# Supplementary material for: Characteristics of stakeholder involvement in systematic and rapid reviews: a methodological review in the area of health services research
Source: PubMed Central journal article supplement — BMJ Open. 2019 Aug 15;9(8):e024587. doi: 10.1136/bmjopen-2018-024587 (PMC6701675; doi:10.1136/bmjopen-2018-024587), 2019-08-15
Supplement: bmjopen-2018-024587.draft_revisions.pdf [file bmjopen-2018-024587.draft_revisions.pdf]

# BMJ Open

BMJ Open is committed to open peer review. As part of this commitment we make the peer review history of every article we publish publicly available.

When an article is published we post the peer reviewers' comments and the authors' responses online. We also post the versions of the paper that were used during peer review. These are the versions that the peer review comments apply to.

The versions of the paper that follow are the versions that were submitted during the peer review process. They are not the versions of record or the final published versions. They should not be cited or distributed as the published version of this manuscript.

BMJ Open is an open access journal and the full, final, typeset and author-corrected version of record of the manuscript is available on our site with no access controls, subscription charges or pay-per-view fees (<http://bmjopen.bmj.com>).

If you have any questions on BMJ Open's open peer review process please email [info.bmjopen@bmj.com](mailto:info.bmjopen@bmj.com)

# BMJ Open

## Characteristics of stakeholder involvement in systematic and rapid reviews: a cross-sectional study in the area of health services research

|                               |                                                                                                                                                                                                                                                                                             |
|-------------------------------|---------------------------------------------------------------------------------------------------------------------------------------------------------------------------------------------------------------------------------------------------------------------------------------------|
| Journal:                      | <i>BMJ Open</i>                                                                                                                                                                                                                                                                             |
| Manuscript ID                 | bmjopen-2018-024587                                                                                                                                                                                                                                                                         |
| Article Type:                 | Research                                                                                                                                                                                                                                                                                    |
| Date Submitted by the Author: | 11-Jun-2018                                                                                                                                                                                                                                                                                 |
| Complete List of Authors:     | Feldmann, Jonas; University of Zurich, Institute of Epidemiology, Biostatistics and Prevention<br>Puhan, Milo; University of Zurich, Institute of Epidemiology, Biostatistics & Prevention<br>Mütsch, Margot; University of Zurich, Institute of Epidemiology, Biostatistics and Prevention |
| Keywords:                     | stakeholder, coproduction, systematic review, rapid review, evidence                                                                                                                                                                                                                        |
|                               |                                                                                                                                                                                                                                                                                             |

SCHOLARONE™  
Manuscripts

Peer Review Only

1  
2  
3 **Characteristics of stakeholder involvement in systematic and rapid**  
4 **reviews:**  
5  
6  
7 **a cross-sectional study in the area of health services research**  
8  
9

10  
11  
12  
13  
14 **Jonas Feldmann, Milo A. Puhan, Margot Mutsch\***  
15

16  
17  
18  
19 For all authors: Department of Epidemiology, Epidemiology, Biostatistics and Prevention  
20  
21 Institute (EBPI), University of Zurich, Zurich, Switzerland  
22  
23  
24  
25  
26  
27

28  
29 \* Corresponding author: Margot Mutsch, Department of Epidemiology, Epidemiology,  
30  
31 Biostatistics and Prevention Institute (EBPI), University of Zurich, Hirschengraben 84, 8001  
32  
33 Zurich, Switzerland. Phone: +41 44 634 4857; Email: margot.muetsch@uzh.ch.  
34  
35  
36  
37  
38

39 Word count:

- 40  
41 • Abstract: 300  
42  
43 • Text: 3,888  
44  
45  
46  
47  
48  
49  
50  
51  
52  
53  
54  
55  
56  
57  
58  
59  
60

## ABSTRACT

**Objective** Little is known about the involvement of stakeholders in reviews of health services research and therefore, the extent and details of their engagement were assessed in systematic and rapid reviews.

**Design** A cross-sectional study

**Search strategy** Four databases (Ovid Medline, Embase, the Cochrane databases of systematic reviews and of other reviews) were searched based on a pre-defined protocol. Targeting health services research, four groups of reviews (systematic reviews (SR), Cochrane systematic reviews (Cochrane SR), rapid reviews (RR) and rapid reviews of the Cochrane database (CD RR) were retrieved between January, 2011 and October, 2015. A sample of 30 reviews for each group was randomly selected resulting in a total of 120 reviews. The standardized data extraction form assessed general and reporting characteristics of included reviews including quality assessment with AMSTAR and nine variables targeting stakeholder involvement.

**Results** From a total of 57,822 articles, 533 (0.9%) were Cochrane SRs, 56,986 (98.5%) SRs, 208 (0.4%) RRs and 95 (0.2%) CD RRs. Overall, 43% (13/30) of SRs and 43% (13/30) of RRs based on a study protocol. Potential conflicts of interests remained unmentioned in 40% (12/30) and 27% (8/30) of SRs and RRs, respectively. We found stakeholder involvement in 13% (4/30) of Cochrane SRs, 20% (6/30) of SRs, 40% (13/30) of RRs and 93% (28/30) of CD RRs. Overall, 33% (17/51) of the responding contact authors mentioned unspecified positive effects of stakeholder involvement.

**Conclusion** RRs and CD RRs involved stakeholders more than twice as frequently than SRs and Cochrane SRs, and they included them in more diverse ways. SRs often targeted decision-makers as audience but rarely involved them directly. Stakeholder engagement was not general practice in either review type (excepted for CD RRs). Especially for SRs, there is still a great potential to improve reporting as well as to engage stakeholders.



1  
2  
3 **Keywords:** stakeholder, coproduction, systematic review, rapid review, evidence  
4  
5  
6  
7

8 **STRENGTHS AND LIMITATIONS OF THIS STUDY**  
9

- 10
- 11 • A systematic approach to assess coproduction and stakeholder involvement in  
12 systematic and rapid reviews was used to fill the gap and to provide an overview of the  
13 current situation.  
14
  - 15 • The broad and joint assessment of reporting and stakeholder characteristics for two  
16 review formats supports the understanding of the current strategies used and informs  
17 future approaches to facilitate integrated knowledge translation.  
18
  - 19 • With the scope of this study being restricted to health services research we intended to  
20 focus on a best-case approach where the context is considered most important and  
21 therefore, stakeholder involvement might be most regularly, but the overall findings  
22 might not be applicable beyond this domain.  
23
  - 24 • The majority of studies were from higher-income countries limiting the generalizability  
25 beyond this setting.  
26
  - 27 • The perception and the reporting of stakeholders might be influenced by the lack of a  
28 uniform definition of stakeholders and depend on the criteria used.  
29  
30  
31  
32  
33  
34  
35  
36  
37  
38  
39  
40  
41  
42  
43  
44  
45  
46  
47  
48  
49  
50  
51  
52  
53  
54  
55  
56  
57  
58  
59  
60

## INTRODUCTION

Evidence synthesis remains a rapidly growing field. There are different methodological approaches and formats depending on the research question and the intended use of the review, such as scoping, systematic or rapid reviews as well as realist syntheses, policy briefs and health technology assessments. A traditional full systematic review (SR) is a review that “attempts to collate all empirical evidence and that fits pre-specified eligibility criteria in order to answer a specific, usually narrow research question or intervention”.<sup>[1]</sup> However, due to their strict regulations in methodology, they require considerable skills and take between 6 months and 2 years to complete.<sup>[2]</sup> It has been estimated that researchers conducting a SR need to invest an average of 1,139 hours (range 216-2,518 hours) and a minimum of 100,000 U.S. dollars.<sup>[3]</sup>

Within SRs, Cochrane full systematic reviews (Cochrane SRs) were established as “gold standard” in knowledge synthesis. Jadad et al. compared Cochrane SRs to other published SRs and found that Cochrane SRs were more likely to be updated. Furthermore, they were found to be less prone to bias due to greater transparency in reporting as well as due to the quality criteria used, such as the risk of bias assessment.<sup>[4]</sup> As a result of their comparison of systematic reviews, Page et al. concluded that the reporting of Cochrane SRs was the most complete one.<sup>[5]</sup> Hopewell et al. described that the inclusion of grey literature routinely performed in Cochrane SRs limited publication bias and provided more conservative treatment effects compared to SR without including grey literature.<sup>[6]</sup>

Rapid reviews (RRs) are characterized by a less complex research question and aim to synthesize evidence within a shorter time period, with time frames ranging from one week to nine months.<sup>[7, 8]</sup> They might, therefore, be prone to be of lower validity as a consequence of accelerating and streamlining the review process.<sup>[7]</sup> However, in response to an increasing

1  
2  
3 demand from end-users, RRs are being performed more frequently than before.[8] Only few  
4 formal definitions of different RRs exist and few studies have examined their methodology.[2] To  
5 contribute to fill this gap, the Cochrane Rapid Reviews Method Group was established in 2015.  
6  
7 Gannan et al. described a lack of transparency and great variability in terms of methods  
8 employed in many RRs.[7] Tricco et al. observed, that there was little coherence in the  
9 terminology of RRs, as only 34% of the reviews matching the RR working definition were  
10 actually described as “rapid review”. Other, less frequently used terms included “rapid evidence  
11 assessment” (11%), “rapid systematic review” (10%), “health technology assessment” (6%) and  
12 “rapid health technology assessment” (6%).[2] Within the Cochrane databases (CD), other  
13 reviews, such as the Dare reviews (Database of Abstracts of Reviews of Effects) or health  
14 technology assessments form special groups, partially including rapid reviews (CD RRs). RRs  
15 target specific audiences including government policymakers, health care institutions, health  
16 professionals and patient associations and research questions are often tailored to these end-  
17 users.[9, 10] Thus, they often involve stakeholders, such as consumers, policymakers or health  
18 institutions, at different phases or levels.  
19  
20  
21  
22  
23  
24  
25  
26  
27  
28  
29  
30  
31  
32  
33

34 Stakeholder as a very broad term may include anyone affected by an issue and/or  
35 anyone who can provide input on the topic.[11, 12] The involvement of stakeholders in health  
36 research may not only direct the research question but also influences the quality,  
37 dissemination and contextualisation of the study results and therefore, contributes to the  
38 sustainability of health systems.[13-15] We especially focused on stakeholder involvement  
39 among health services research, where the context of conducted studies is most important, and  
40 we expected this to be the research field where stakeholders are involved most regularly.  
41  
42  
43  
44  
45  
46  
47  
48  
49

### 50 **Study aim**

51  
52 To date, little is known about the extent and the characteristics of involved stakeholders  
53 in SRs and RRs and there have been few efforts to measure the specific benefits and  
54 challenges of stakeholder involvement. We consider this information to be relevant for an  
55  
56  
57  
58  
59

1  
2  
3 integrated knowledge translation, the dissemination, implementation and acceptance of SRs  
4 and RRs in policy and practice and therefore, for the best planning, adaptation and conduct of  
5 future SRs and RRs. We focused on SRs and RRs as they represent different types of evidence  
6 synthesis. Studies included were restricted to the area of health services research as an  
7 established area for SRs and RRs as well as a best-case sample with a considerable extent of  
8 stakeholder involvement. We aimed to assess all kind of stakeholder involvement in recently  
9 published SRs and RRs and to specifically point out reporting and study characteristics as well  
10 as measures and identified challenges of coproduction.  
11  
12  
13  
14  
15  
16  
17  
18  
19

## 20 **METHODS**

### 21 **Study design**

22  
23  
24  
25 Based on the pre-specified protocol this cross-sectional study was performed to assess  
26 characteristics and reporting of coproduction in random samples of SRs and RRs in the field of  
27 health services research (Supplementary File S1). For the reporting of this study the STROBE  
28 checklist was used (Supplementary File S2).  
29  
30  
31  
32  
33  
34

### 35 **Search strategy and screening**

36  
37 For SR we searched the Cochrane Database for articles including the term “systematic  
38 review” in their title or abstract (Cochrane SR) and Ovid Medline and Embase with excluding the  
39 term “Cochrane” in title or abstract. RR were searched in Ovid Medline and Embase and in the  
40 Cochrane databases (for CD RR) including the terms “rapid systematic review”, “rapid review”,  
41 “rapid evidence assessment” or “rapid health technology assessment” in their title or abstract.  
42  
43 We included studies published between January, 2011 and December, 2015 without language  
44 restriction. Our search was completed on October 22<sup>nd</sup>, 2015 and therefore, the search results  
45 for 2015 did not cover the whole year. All results were pooled by review type and duplicates  
46 excluded. The lists were randomly ordered by an external independent reviewer and were then  
47 screened in consecutive order for inclusion and exclusion criteria by two reviewers (JF following  
48  
49  
50  
51  
52  
53  
54  
55  
56  
57  
58  
59  
60

1  
2  
3 introduction and spot-checking by MM) until a total of 30 studies were reached per group. Full  
4 text screening was performed to ensure the decision. One review author (JF) then performed  
5 data extraction, supervised and spot-checked by a second researcher (MM). Disagreements  
6 were resolved by consensus.  
7  
8  
9

### 10 11 12 **Sample size and selection of review groups**

13  
14 As RR were often targeted to specific audiences [9, 10], they were expected to involve  
15 stakeholders to a greater extent. We estimated a proportion of stakeholder involvement of 0.70  
16 for RR and of 0.25 for SR, which resulted in a minimal expected difference of 0.45. For two  
17 groups with n=25 per group there will be an estimated power of 0.88 and an alpha of 0.023. To  
18 account for a potential subgroup analysis, we include a sample of n=30 reviews per group, with  
19 4 review groups (Cochrane SRs, SRs, RRs and CD RRs). This resulted in an overall sample of  
20 120 studies.  
21  
22  
23  
24  
25  
26  
27  
28  
29

### 30 31 **Inclusion and exclusion criteria**

32 We included studies targeting health services research as defined by Lohr [16]: "Health  
33 services research is the multidisciplinary field of scientific investigation that studies how social  
34 factors, financing systems, organizational structures and processes, health technologies, and  
35 personal behaviors affect access to health care, the quality and cost of health care, and  
36 ultimately, our health and well-being. Its research domains are individuals, families,  
37 organizations, institutions, communities, and populations." Therefore, Health Technology  
38 Assessments (HTAs) targeting effectiveness as well as meta-analyses and systematic reviews  
39 for effectiveness and utility, pharmaceutical trials under everyday conditions, basic research in  
40 care-related fields, quality research, methodological developments in the field of health services  
41 research, the development and application of new technologies (e-health) and the  
42 implementation of knowledge into the clinical practice were included. We excluded studies that  
43 focused exclusively on economic or cost analyses, performed a narrative review, an overview of  
44 reviews or a protocol of a systematic review. Efficacy studies without assessing the quality of  
45  
46  
47  
48  
49  
50  
51  
52  
53  
54  
55  
56  
57  
58  
59  
60

1  
2  
3 life, clinical efficacy trials phases I to III, epidemiological studies to assess determinants or risk  
4 factors, non-human studies, establishment of databases or registries, studies with unclear  
5 design or description of the intervention were also excluded.  
6  
7  
8  
9

### 10 **Data extraction**

11  
12 Stakeholders were defined as people with a particular interest in the research topic (but  
13 are not members of the primary research team).[11, 17] We evaluated any kind of stakeholder  
14 involvement and recorded different groups of stakeholders, such as institutional health care  
15 providers, hospitals, community services, consumers, government agencies and health care  
16 policymakers at Federal, State and local levels and associations of health professionals. If  
17 available, we identified their fields and stages of involvement as well as their contribution to the  
18 study results. In addition, we extracted the following data: institution where the review was  
19 performed, contact details of the corresponding author, the type of intervention, study setting,  
20 characteristics of the population (population size, age range, sex), funding, declared conflict of  
21 interest, year of publication. The methodological quality of included articles was assessed using  
22 the AMSTAR tool, a measurement tool for the assessment of multiple systematic reviews.[18]  
23 Where available, our rating was compared with an already existing one from the “health  
24 evidence” or “health systems evidence” platforms.[19, 20] In addition, the use of the PRISMA  
25 checklist was reporting when mentioned in the articles.[21] To get information about  
26 unpublished stakeholder involvement and to assess the extent or stages of their involvement,  
27 pre-formulated questions were sent by email to the contact authors of the included articles. We  
28 asked them, if there had been any stakeholder involvement and if so, to specify the number of  
29 stakeholders, the stages of involvement and the effect on the review outcome. In case of  
30 missing responses, one reminder was sent.  
31  
32  
33  
34  
35  
36  
37  
38  
39  
40  
41  
42  
43  
44  
45  
46  
47  
48  
49  
50  
51

52 **Patient and Public involvement** None involved.  
53  
54  
55  
56  
57  
58  
59  
60

## RESULTS

Our search identified a total of 89,798 reviews, with 57,822 articles remaining after exclusion of duplicates. 533 (0.9%) of them were categorized as Cochrane SR, 56,986 (98.6%) as SR, 95 (0.2%) as CD RR and 208 (0.4%) as RR. A total of 227 SRs (0.4%), 128 Cochrane SRs (24%), 165 RRs (79.3%) and 89 CD RRs (93.7%) had to be screened to get the study sample.[22-141] Therefore, 197 SRs, 98 Cochrane SRs, 135 RRs and 59 CD RRs were excluded following title and abstract screening, because they did not meet the inclusion criteria. (Supplementary Table S1) Figure 1 presents the flow diagram of study inclusion.

*[insert Figure 1 here]*

The amount of published SRs increased steadily and the annual number of SRs indexed in Ovid Medline, Embase and the Cochrane database almost doubled between 2011 and 2014 from 7,810 to 14,250. The number of RRs published annually increased almost four-fold in only two years, from 25 in 2012 to 98 in 2014. Following the increasing popularity of RRs, the ratio of RRs performed in relation to the number of SRs performed increased. In 2012, only 25 of 9,816 indexed reviews (0.3%) were RRs. In 2014, already 98 of 14,348 reviews (0.7%) were RRs. (Supplementary Table S2)

**Table 1**

**Characteristics of included reviews by review type**

|                                   | Cochrane SR (%) | SR (%)   | RR (%)  | CD RR (%) | Total (%) |
|-----------------------------------|-----------------|----------|---------|-----------|-----------|
| <b>Total number of records</b>    | 533             | 56,986   | 208     | 95        | 57,822    |
| <b>Random sample (% of total)</b> | 30 (6)          | 30 (0.1) | 30 (14) | 30 (32)   | 120 (0.2) |

|                                                                             |          |          |          |          |           |
|-----------------------------------------------------------------------------|----------|----------|----------|----------|-----------|
| <b>Geographic location of the corresponding author (% of random sample)</b> |          |          |          |          |           |
| Africa                                                                      | 2 (7)    | 0        | 0        | 0        | 2 (2)     |
| Asia                                                                        | 5 (17)   | 3 (10)   | 1 (3)    | 0        | 9 (8)     |
| Australia                                                                   | 3 (10)   | 5 (17)   | 2 (7)    | 0        | 10 (8)    |
| Europe                                                                      | 11 (37)  | 13 (43)  | 13 (43)  | 2 (7)    | 39 (33)   |
| North America                                                               | 7 (23)   | 8 (27)   | 14 (47)  | 28 (93)  | 57 (48)   |
| South America                                                               | 2 (7)    | 1 (3)    | 0        | 0        | 3 (3)     |
| <b>Thematic focus</b>                                                       |          |          |          |          |           |
| Prevention                                                                  | 11 (37)  | 5 (17)   | 4 (13)   | 7 (23)   | 27 (23)   |
| Treatment                                                                   | 18 (60)  | 14 (47)  | 15 (50)  | 16 (53)  | 63 (53)   |
| Health system                                                               | 1 (3)    | 2 (7)    | 7 (23)   | 7 (23)   | 17 (14)   |
| Community-based <sup>1</sup>                                                | 0        | 9 (30)   | 4 (13)   | 0        | 13 (11)   |
| <b>Funding</b>                                                              |          |          |          |          |           |
| Governmental, institutional or WHO                                          | 30 (100) | 30 (100) | 30 (100) | 30 (100) | 120 (100) |
| Additional funding by company                                               | 0        | 0        | 1 (3)    | 0        | 1 (1)     |
| <b>Conflict of interest (COI)</b>                                           |          |          |          |          |           |
| Declared none                                                               | 21 (70)  | 15 (50)  | 19 (63)  | 29 (97)  | 84 (70)   |
| COI declared                                                                | 9 (30)   | 3 (10)   | 3 (10)   | 0        | 15 (13)   |
| Unmentioned                                                                 | 0        | 12 (40)  | 8 (27)   | 1 (3)    | 21 (18)   |
| <b>Study protocol</b>                                                       |          |          |          |          |           |



|                                  |            |           |           |           |           |
|----------------------------------|------------|-----------|-----------|-----------|-----------|
| Yes, mentioned in article        | 30 (100)   | 5 (17)    | 4 (13)    | 1 (3)     | 40 (33)   |
| Yes, mentioned in correspondence | 0          | 8 (27)    | 9 (30)    | 0         | 17 (14)   |
| No, confirmed by correspondence  | 0          | 2 (7)     | 4 (13)    | 0         | 6 (5)     |
| Unmentioned                      | 0          | 15 (50)   | 13 (43)   | 29 (97)   | 57 (48)   |
| <b>AMSTAR rating</b>             |            |           |           |           |           |
| Median (range)                   | 11 (7, 11) | 7 (3, 11) | 4 (2, 10) | 8 (5, 11) | 8 (2, 11) |

<sup>1</sup> With exclusion of treatment or preventive interventions

AMSTAR: measurement tool for the “assessment of multiple systematic reviews”, not applicable questions were not counted.

CD: Cochrane database; RR: rapid review; SR: systematic review; WHO: World Health Organisation.

Table 1 presents the characteristics of the included studies. Cochrane SRs generally focused on the prevention and treatment of specific conditions, whereas 30% of SRs were categorized with a community-based topic, with a wide range of participants and possible outcomes and a broader range of study settings. Of note, 23% of each, RRs and CD RRs, were categorized as health system intervention, because they focused on methodological questions or health quality research. We also detected noticeable differences when comparing the median AMSTAR scores: Cochrane SRs and CD RRs showed higher median scores than SRs and RRs. In non-Cochrane reviews information about characteristics and methodological specifications of included studies was often lacking. Also, all 30 Cochrane SRs (100%) mentioned a pre-existing review protocol, whereas 7% of SR and 13% of RRs did not report any protocol and a significant amount of SRs (50%) and RRs (43%) did not clarify if there had been a protocol or not. Similarly, all 30 Cochrane SRs and all but one CD RRs (97%) included a conflict of interest statement, whereas 40% of SRs and 27% of RRs did not include such a paragraph. All reviews were funded by national or international governmental or institutional sources. Only one RR

reported the acceptance of additional funding from a pharmaceutical company.

**Table 2**

**Characteristics of the study population by type of included review**

|                                    | <b>Cochrane<br/>SR (%)</b> | <b>SR (%)</b>              | <b>RR (%)</b>             | <b>CD RR (%)</b>      | <b>Total (%)</b>        |
|------------------------------------|----------------------------|----------------------------|---------------------------|-----------------------|-------------------------|
| <b>Setting</b>                     |                            |                            |                           |                       |                         |
| Hospital setting,<br>inpatients    | 7 (23)                     | 1 (3)                      | 8 (27)                    | 10 (33)               | 26 (22)                 |
| Outpatients                        | 9 (30)                     | 9 (30)                     | 7 (23)                    | 4 (13)                | 29 (24)                 |
| Home setting                       | 0                          | 3 (10)                     | 0                         | 3 (10)                | 6 (5)                   |
| Community setting                  | 5 (17)                     | 10 (33)                    | 13 (43)                   | 7 (23)                | 35 (29)                 |
| Multiple                           | 9 (30)                     | 5 (17)                     | 0                         | 4 (13)                | 18 (15)                 |
| Other                              | 0                          | 2 (7)                      | 2 (7)                     | 2 (7)                 | 6 (5)                   |
| <b>Population size<sup>1</sup></b> |                            |                            |                           |                       |                         |
| Median<br>(range)                  | 733<br>(0; 390,769)        | 2,846.5<br>(36; 4,650,877) | 2,717<br>(102; 1,700,000) | 349.5<br>(0; 372,746) | 1,622<br>(0; 4,650,877) |
| <b>Population type</b>             |                            |                            |                           |                       |                         |
| Patients with<br>disease/condition | 18 (60)                    | 18 (60)                    | 20 (67)                   | 26 (87)               | 82 (68)                 |
| Healthy population                 | 9 (30)                     | 8 (27)                     | 9 (30)                    | 3 (10)                | 29 (24)                 |
| Other                              | 3 (10)                     | 4 (13)                     | 1 (3)                     | 1 (3)                 | 9 (8)                   |
| <b>Age range (yrs)</b>             |                            |                            |                           |                       |                         |
| Adults (>18)                       | 20 (67)                    | 14 (47)                    | 13 (43)                   | 25 (83)               | 72 (60)                 |
| Adolescents (13-18)                | 2 (7)                      | 1 (3)                      | 1 (3)                     | 1 (3)                 | 5 (4)                   |
| Children (0-12)                    | 3 (10)                     | 1 (3)                      | 1 (3)                     | 0                     | 5 (4)                   |
| Youth (0-18)                       | 1 (3)                      | 2 (7)                      | 0                         | 0                     | 3 (3)                   |

|                   |         |         |         |          |          |
|-------------------|---------|---------|---------|----------|----------|
| Other subgroups   | 1 (3)   | 6 (20)  | 2 (7)   | 3 (10)   | 12 (10)  |
| Population        | 3 (10)  | 6 (20)  | 13 (43) | 1 (3)    | 23 (19)  |
| <b>Sex</b>        |         |         |         |          |          |
| Females and males | 29 (97) | 28 (93) | 24 (80) | 30 (100) | 111 (93) |
| Females only      | 1 (3)   | 1 (3)   | 4 (13)  | 0        | 6 (5)    |
| Males only        | 0       | 1 (3)   | 2 (7)   | 0        | 3 (3)    |

CD: Cochrane database; RR: rapid review; SR: systematic review; WHO: World Health Organisation

<sup>1</sup> Zero means that there were no participants mentioned or included in the review.

As shown in Table 2 and with respect to the study population, we detected noticeable differences between the different study types, especially between Cochrane- and non-Cochrane reviews. For example, the median population size was lower for Cochrane reviews compared to non-Cochrane SRs and RRs, respectively. Furthermore, non-Cochrane reviews were not as restrictive regarding the age range and setting or other characteristics of the studies included: 43% of RRs and 20% of SRs declared that they had not applied any restrictions concerning the age of their participants in contrast to 10% of Cochrane SRs and 3% of CD RRs.

**Table 3**

**General characteristics of stakeholder involvement (SI) by review type**

|                                     | <b>Cochrane<br/>SR (%)<br/>(n=30)</b> | <b>SR (%)<br/>(n=30)</b> | <b>RR (%)<br/>(n=30)</b> | <b>CD RR (%)<br/>(n=30)</b> | <b>Total (%)<br/>(N=120)</b> |
|-------------------------------------|---------------------------------------|--------------------------|--------------------------|-----------------------------|------------------------------|
| SI mentioned in article             | 2 (7)                                 | 2 (7)                    | 6 (20)                   | 28 (93)                     | 38 (32)                      |
| SI only mentioned in correspondence | 2 (7)                                 | 4 (13)                   | 7 (23)                   | 0                           | 13 (11)                      |
| <b>Total SI</b>                     | <b>4 (13)</b>                         | <b>6 (20)</b>            | <b>13 (43)</b>           | <b>28 (93)</b>              | <b>51 (43)</b>               |

|                                                                  |          |          |           |             |            |
|------------------------------------------------------------------|----------|----------|-----------|-------------|------------|
| <b>SI per year</b>                                               |          |          |           |             |            |
| 2011                                                             | 0/5 (0)  | 0/1 (0)  | 0/3 (0)   | 0/0 (0)     | 0/9 (0)    |
| 2012                                                             | 3/7 (43) | 1/5 (20) | 1/3 (33)  | 0/0 (0)     | 5/15 (33)  |
| 2013                                                             | 0/9 (0)  | 0/6 (0)  | 3/5 (60)  | 9/10 (90)   | 12/30 (40) |
| 2014                                                             | 1/7 (14) | 3/9 (30) | 6/15 (40) | 2/3 (67)    | 12/34 (35) |
| 2015                                                             | 0/2 (0)  | 2/9 (22) | 3/4 (75)  | 17/17 (100) | 22/32 (69) |
| <b>Number of stakeholders involved per review (% of SI)</b>      |          |          |           |             |            |
| 1                                                                | 2 (50)   | 2 (33)   | 2 (15)    | 0           | 6 (12)     |
| 2-4                                                              | 1 (25)   | 1 (17)   | 4 (31)    | 2 (7)       | 8 (16)     |
| >4                                                               | 1 (25)   | 3 (50)   | 4 (31)    | 26 (93)     | 34 (67)    |
| Unspecified                                                      | 0        | 0        | 3 (23)    | 0           | 3 (6)      |
| <b>Types of stakeholders (multiple roles possible) (% of SI)</b> |          |          |           |             |            |
| Patients/consumers                                               | 2 (50)   | 0        | 2 (15)    | 5 (18)      | 9 (18)     |
| Professional organisations                                       | 1 (25)   | 0        | 0         | 5 (18)      | 6 (12)     |
| Caregivers                                                       | 2 (50)   | 0        | 3 (23)    | 23 (82)     | 28 (55)    |
| Researchers                                                      | 1 (25)   | 3 (50)   | 2 (15)    | 0           | 6 (12)     |
| Policymakers                                                     | 0        | 3 (50)   | 4 (31)    | 3 (11)      | 10 (20)    |
| Unspecified                                                      | 0        | 0        | 2 (15)    | 4 (14)      | 6 (12)     |
| <b>Funding source (% of SI)</b>                                  |          |          |           |             |            |
| Governmental or institutional funding                            | 4 (100)  | 6 (100)  | 13 (100)  | 28 (100)    | 51 (100)   |
| Funding source involved as stakeholder                           | 0        | 1 (17)   | 2 (15)    | 0           | 3 (6)      |

| Thematic focus (% per review type per topic) |           |           |           |             |            |
|----------------------------------------------|-----------|-----------|-----------|-------------|------------|
| Prevention                                   | 0/11 (0)  | 0/5 (0)   | 1/4 (25)  | 6/7 (86)    | 7/27 (26)  |
| Treatment                                    | 4/18 (22) | 3/14 (21) | 6/15 (40) | 16/16 (100) | 29/63 (46) |
| Health system                                | 0/1 (0)   | 1/2 (50)  | 5/7 (71)  | 6/7 (86)    | 12/17 (71) |
| Community-based                              | 0/0 (0)   | 2/9 (22)  | 1/4 (25)  | 0/0 (0)     | 3/13 (23)  |

CD: Cochrane database; SR: systematic review; RR: rapid review; SI: stakeholder involvement

Interestingly, the proportion of stakeholder involvement has been quite constant between the years 2012 (5/15, 33%) and 2014 (12/34, 34%) even though the amount of RR has increased exponentially (Table 3). There was, however, a remarkable increase in the proportion of stakeholder involvement for the year 2015 (22/32, 69%), but this was mostly due to the fact that a majority of CD RR, which presented the highest proportion of stakeholder involvement, was indexed in 2015. When comparing the amount of stakeholder involvement in different review topics, there were notable differences: The proportion of stakeholder involvement in reviews focusing on prevention or treatment of specific conditions was lower than in those targeting health system interventions. Any stakeholder involvement was mentioned in 13% of Cochrane SRs, 20% of SRs, 43% of RRs and 93% of CD RRs. Except for CD RRs, where the involvement of stakeholders was routinely reported in the methods section, about half of the stakeholder involvement was reported in the articles and the other half was confirmed via email by study contact authors and remained unmentioned in the reviews. With 67% the email response rate was highest for RRs.

CD RRs turned out to have by far the highest proportion of reported stakeholder involvement. They are usually conducted and published in a standardised format, which features the contribution of expert panels. In four CD RRs, the exact type of stakeholders was not specified, but for the remaining they were listed in the appendix of the corresponding articles.

It was then, however, not specified what they specifically contributed to the review, e.g. in which phase(s) of the process they were involved or if their contribution had affected the final results and conclusions of the reviews (Table 4). One author mentioned in the review that the reason for involving stakeholders was to understand the clinical perspective.

**Table 4****Engagement characteristics of stakeholder involvement (SI) by review type**

|                                                          | <b>Cochrane<br/>SR (%)<br/>(n=30)</b> | <b>SR (%)<br/>(n=30)</b> | <b>RR (%)<br/>(n=30)</b> | <b>CD RR (%)<br/>(n=30)</b> | <b>Total (%)<br/>(N=120)</b> |
|----------------------------------------------------------|---------------------------------------|--------------------------|--------------------------|-----------------------------|------------------------------|
| <b>Stages of SI (multiple stages possible) (% of SI)</b> |                                       |                          |                          |                             |                              |
| Research question                                        | 1 (25)                                | 1 (17)                   | 4 (31)                   | 0                           | 6 (12)                       |
| Study characteristics                                    | 0                                     | 0                        | 6 (46)                   | 0                           | 6 (12)                       |
| Protocol writing                                         | 0                                     | 1 (17)                   | 2 (15)                   | 0                           | 3 (6)                        |
| Review process                                           | 3 (75)                                | 1 (17)                   | 5 (38)                   | 0                           | 9 (18)                       |
| Interpretation of findings                               | 0                                     | 1 (17)                   | 1 (8)                    | 0                           | 2 (4)                        |
| Result synthesis                                         | 0                                     | 0                        | 2 (15)                   | 0                           | 2 (4)                        |
| Multiple or all stages                                   | 1 (25)                                | 2 (33)                   | 1 (8)                    | 28 (100)                    | 32 (63)                      |
| Unspecified                                              | 0                                     | 2 (33)                   | 1 (8)                    | 0                           | 3 (6)                        |
| <b>Reasons mentioned for SI (% of SI)</b>                |                                       |                          |                          |                             |                              |
| Stakeholder commissioned / requested review              | 0                                     | 1 (17)                   | 4 (31)                   | 0                           | 5 (10)                       |
| To get consumer feedback                                 | 1 (25)                                | 0                        | 0                        | 0                           | 1 (2)                        |

|                                                                                     |        |        |         |          |         |
|-------------------------------------------------------------------------------------|--------|--------|---------|----------|---------|
| To refine research question                                                         | 1 (25) | 0      | 0       | 0        | 1 (2)   |
| To make the review more relevant for target audience                                | 2 (50) | 0      | 8 (62)  | 0        | 10 (20) |
| To understand clinical perspective                                                  | 0      | 1 (17) | 0       | 1 (4)    | 2 (4)   |
| Unspecified                                                                         | 0      | 4 (67) | 1 (7)   | 27 (96)  | 32 (63) |
| <b>Effect of SI mentioned by authors (% of SI)</b>                                  |        |        |         |          |         |
| Substantial or positive effect                                                      | 2 (50) | 4 (67) | 11 (85) | 0        | 17 (33) |
| Negative effect                                                                     | 0      | 0      | 0       | 0        | 0       |
| No effect mentioned                                                                 | 2 (50) | 2 (33) | 2 (15)  | 28 (100) | 34 (67) |
| Explicit encouragement for involving stakeholders in further studies (% of reviews) | 0      | 1 (3)  | 1 (3)   | 1 (3)    | 3 (2)   |

CD: Cochrane database; SR: systematic review; RR: rapid review; SI: stakeholder involvement

We detected stakeholder involvement in 43% (13/30) of RRs. The biggest groups of stakeholders were policymakers and caregivers, followed by researchers and patients. In contrast to CD RRs, there was usually a small number of stakeholders engaged in RRs. They were involved at different phases, such as determining study characteristics, formulating the research question, within the review process in general, and less commonly in protocol writing, result synthesis and the interpretation of findings. One article involved stakeholder throughout all stages, in one case the phase of involvement was not specified. In total, 85% of the authors confirmed, that the stakeholders had significantly contributed to the review. Of these, 62% mentioned that involving stakeholders supported to increase the impact of the review and enabled to focus on the needs of target groups, which made the review more relevant to e.g.

1  
2 patients or policymakers. Stakeholders had commissioned one third of the RRs or had asked for  
3 evidence. Only two of 13 authors (15%) did not mention any substantial effect. In two cases one  
4 of the funding sources were involved as stakeholder.  
5  
6  
7  
8  
9

10 We identified stakeholder involvement in 20% (6/30) of SRs. In four cases the  
11 stakeholder involvement was confirmed via email, two articles mentioned the involvement of  
12 stakeholders. Only two types of stakeholders were reported: policymakers and researchers. If  
13 mentioned, all phases of involvement occurred about equally. A total 67% (4/6) study authors  
14 reported significant benefit from the stakeholders' contributions. One author mentioned that  
15 stakeholder supported the researchers to understand different perspectives of the problem, and  
16 33% (2/6) reported no effect. In one case, the stakeholder was involved as funding source.  
17  
18  
19  
20  
21  
22  
23  
24  
25

26 Cochrane SRs turned out to be the group with the smallest amount of stakeholder  
27 involvement. All stakeholder involvement was confirmed and specified by email. The involved  
28 types of stakeholders were patients, caregivers, professional organisations and researchers.  
29 They were mostly involved for providing feedback during the review process, in one case they  
30 contributed in formulating the review question. One review involved stakeholders at all stages. A  
31 total of 50% (2/4) of the authors reported substantial benefit, the other 50% (2/4) reported no  
32 significant effect on study results or conclusions. Two authors had involved stakeholders to  
33 make the review more relevant for its target audience, one author claimed that stakeholders  
34 helped him to refine the research question. One author involved stakeholders to get direct  
35 consumer feedback before publishing the review. No stakeholders were involved in funding.  
36  
37  
38  
39  
40  
41  
42  
43  
44  
45  
46  
47

## 48 **DISCUSSION**

49 The involvement of stakeholders varies by review type. Our findings suggest that RRs  
50 tend to involve stakeholders more than twice as frequently as SRs. On average, they also  
51 involved a greater number of stakeholders per review. In addition, we detected a significant  
52  
53  
54  
55  
56  
57  
58  
59  
60



1  
2  
3 difference in the phases in which stakeholders were involved. RRs involved them at very early  
4 stages of the review process, such as determining the intentional study characteristics or  
5  
6  
7 formulating the research question. Furthermore, it seemed to be much more common for  
8  
9 policymakers, who were the most frequent group of stakeholders involved in RRs, or other  
10  
11 stakeholder groups, to substantially contribute to RRs than SRs. Of note, the majority of RR and  
12  
13 SR authors reported that the involved stakeholders had positive and considerable effects on the  
14  
15 study results, making the review more relevant for the targeted audience. This corresponds with  
16  
17 Cottrell et al. who mentioned that stakeholders might contribute to different study types and  
18  
19 evidence phases.[142] It is also in agreement with the earlier described findings of Keown et  
20  
21 al.[143] who concluded, that stakeholder involvement led to increased relevance and depth of  
22  
23 review findings, more clarity in defining research questions, broader dissemination of their  
24  
25 results and increased awareness of target groups. Although they mentioned that this  
26  
27 coproduction process required flexibility and might be resource- and time-intensive, they  
28  
29 nevertheless concluded that involving stakeholders facilitated implementation and should be  
30  
31 indispensable for future research.

32  
33 However, the minority of authors reporting no effect of stakeholder involvement on the  
34  
35 review process, may illustrate that the stakeholders' contribution to SRs was seen as an  
36  
37 additional and welcome feature to the review, but not as a substantial part. We, therefore,  
38  
39 suggest that the contribution of involved stakeholders in RRs seemed to be more substantial  
40  
41 than in SRs in general and still needs improvement.

42  
43  
44 The noticeable methodological gaps between SR and RR, which are also visible when  
45  
46 comparing the median AMSTAR scores, are most probably caused by the pre-specified study  
47  
48 protocol and the much more explicit exclusion and inclusion criteria in Cochrane reviews. The  
49  
50 higher median population as well as the less specific age range or study setting in non-  
51  
52 Cochrane reviews illustrates that the studies they included had a broader spectrum of possibly  
53  
54 included patients. Our findings regarding the methodological distinctions between different  
55  
56 review types are consistent with the findings of Tricco et al., who assessed reviews of five  
57  
58  
59

1  
2  
3 different review types using the AMSTAR tool [144], Turner et al [145] and Page et al [5]. They  
4 all suggested strategies to improve the methodological quality of future reviews, for example  
5 through the use of guidelines such as the PRISMA checklists.  
6  
7  
8  
9

10 Watt et al. also studied the differences between SRs and RRs and presented evidence  
11 that their conclusions did not differ much for similar research questions.[8] They found RRs to  
12 be useful in certain cases, e.g. in clinical practice and for policy decisions, especially because of  
13 their ability to be highly responsive to the development of new technologies and technique.[8]  
14 Cameron et al. also emphasized that overall outcomes did not vary significantly in cases where  
15 both RRs and SRs were conducted.[9] However, Gannan et al. claimed that SRs generally  
16 provided greater depth of information and more detail in formulating recommendations and  
17 concluded that RRs were no viable alternatives to full SRs.[7]  
18  
19  
20  
21  
22  
23  
24  
25  
26  
27

28 One author reported that a stakeholder specifically “asked for evidence within four  
29 months”. This may indicate, that RRs better fit to the needs of stakeholders than time-  
30 consuming SRs. And, especially, when the target audience of the review will not be exclusively  
31 academia-based, targeting policymakers for example, there is urgent need for researchers to  
32 include representatives of that audience in the review process, to reflect their perspectives. In  
33 future, this would result in a higher proportion of stakeholder involvement.  
34  
35  
36  
37  
38  
39  
40  
41

42 We could only identify about half of the stakeholder involvement due to missed reporting.  
43 The other half was identified subsequently, via email-contact with study authors. Given the fact  
44 that nearly half of our emails to study authors remained unanswered or could not be sent, the  
45 rate of unmentioned stakeholder involvement might still be higher than our numbers suggest. Of  
46 note, there was no significant difference between SRs and RRs in the percentage of  
47 unmentioned stakeholder involvement, except for CD RRs, where all stakeholder involvement  
48 was mentioned in the reviews.  
49  
50  
51  
52  
53  
54  
55

56 There are several definitions of the term “stakeholder”. Not all study authors used the  
57  
58  
59

1  
2  
3 same criteria to determine, whether any person involved in the review was categorized as  
4 stakeholder or not. In their emails, some authors mentioned experts or peer reviewers and listed  
5 them as stakeholders. One author listed members of the research team, who performed  
6 literature research and data extraction as stakeholders. Given all the information about who was  
7 involved in the reviews, it was sometimes difficult to conclude whom we would count as  
8 stakeholder and whom as “expert” from the same, or from a related field. Interdisciplinary  
9 knowledge exchange is an important part of evidence-based research, but there is great  
10 heterogeneity in whether experts from other fields are considered stakeholders or not, such as  
11 e.g. researchers of the study team. Regarding the fact that we did not count any experts or peer  
12 reviewers to the group of possible stakeholders, we might have presented a significantly higher  
13 percentage of stakeholder involvement by including them. There is, therefore, urgent need to  
14 establish a widely accepted definition of a stakeholder, such as suggested by Pollock et al., who  
15 propose a broad definition of possible stakeholders [17]: “We define stakeholders as any  
16 potential knowledge user whose primary job is not directly in research, including people with a  
17 healthcare condition, their families, friends and caregivers, health professionals, decision  
18 makers and others.” Furthermore, discussion is needed, whether the funding body of a review  
19 might contribute as a stakeholder and how a potentially associated conflict of interest could be  
20 avoided.  
21  
22  
23  
24  
25  
26  
27  
28  
29  
30  
31  
32  
33  
34  
35  
36  
37  
38  
39

40 Although the overall proportion of stakeholder involvement has not yet increased  
41 prominently in the past few years, there have still been considerable efforts in creating  
42 standardized procedures for involving stakeholders in evidence synthesis. Keown et al.  
43 identified five opportunities in the systematic review process, where potential stakeholders could  
44 be engaged on a regular base.[143] The CD RRs included were mainly performed by Health  
45 Quality Ontario (Canada) and routinely hold expert panels, including physicians, caregivers and  
46 sometimes, consumer representatives and professional organisations. The fact that they  
47 included stakeholders on a regular basis confirms, what Keown et al [143] had already  
48 suggested: the engagement of audience members interested in or affected by the investigated  
49  
50  
51  
52  
53  
54  
55  
56  
57  
58  
59  
60

1  
2  
3 topic definitively results in more benefits than limitations. We, therefore, suggest that future  
4 researcher involve stakeholders more broadly in the process of evidence synthesis, to increase  
5 the relevance and acceptance of the knowledge transfer. Furthermore, stakeholder involvement  
6 should be included and evaluated in reporting checklists of all review types.  
7  
8  
9

## 10 11 12 13 14 **ACKNOWLEDGMENT**

15  
16 We are indebted to Julia Kreis and Aline Flatz for reviewing the protocol and our thanks go to  
17 Sarah Haile for generating the random lists. Parts of this work have been presented at the  
18 Global Evidence Summit September 2017 in Cape Town, SA.  
19  
20  
21

22  
23  
24 **Contributors** All authors conceived and designed the study. JF collected and interpreted the  
25 data and essentially contributed to the writing of the manuscript. MP and MM supervised the  
26 overall research and critically revised the manuscript. All authors approved the final manuscript.  
27  
28

29  
30 **Funding** This research received no specific grant from any funding agency in the public,  
31 commercial or not-for-profit sectors.  
32  
33

34  
35 **Competing interests** None declared.  
36

37  
38 **Patient consent** Not required.  
39

40  
41 **Provenance and peer review** Not commissioned; externally peer reviewed.  
42

43  
44 **Data sharing statement** No additional data are available.  
45  
46

## 47 **Legend Figure 1**

48  
49 **Flow diagram of study selection.**

50  
51 CD: Cochrane database; RR: rapid review; SR: systematic review  
52  
53  
54  
55  
56  
57  
58  
59  
60

## REFERENCES

1. Khangura S, Konnyu K, Cushman R, Grimshaw J, Moher D. Evidence summaries: the evolution of a rapid review approach. *Syst Rev.* 2012;1:10. doi: 10.1186/2046-4053-1-10. PubMed PMID: 22587960; PubMed Central PMCID: PMCPMC3351736.
2. Tricco AC, Antony J, Zarin W, Strifler L, Ghassemi M, Ivory J, et al. A scoping review of rapid review methods. *BMC Med.* 2015;13:224. doi: 10.1186/s12916-015-0465-6. PubMed PMID: 26377409; PubMed Central PMCID: PMCPMC4574114.
3. Petticrew M, Roberts H. *Systematic Reviews in the Social Sciences: A Practical Guide.* Systematic Reviews in the Social Sciences: A Practical Guide. 2006:1-336. doi: 10.1002/9780470754887. PubMed PMID: WOS:000301236200012.
4. Jadad AR, Cook DJ, Jones A, Klassen TP, Tugwell P, Moher M, et al. Methodology and reports of systematic reviews and meta-analyses - A comparison of COCHRANE reviews with articles published in paper-based journals. *Jama-J Am Med Assoc.* 1998;280(3):278-80. doi: DOI 10.1001/jama.280.3.278. PubMed PMID: WOS:000074706000026.
5. Page MJ, Shamseer L, Altman DG, Tetzlaff J, Sampson M, Tricco AC, et al. Epidemiology and Reporting Characteristics of Systematic Reviews of Biomedical Research: A Cross-Sectional Study. *PLoS Med.* 2016;13(5):e1002028. doi: 10.1371/journal.pmed.1002028. PubMed PMID: 27218655; PubMed Central PMCID: PMCPMC4878797.
6. Hopewell S, Clarke M, Lefebvre C, Scherer R. Handsearching versus electronic searching to identify reports of randomized trials. *Cochrane Database Syst Rev.* 2007;(2):MR000001. doi: 10.1002/14651858.MR000001.pub2. PubMed PMID: 17443625.
7. Ganann R, Ciliska D, Thomas H. Expediting systematic reviews: methods and implications of rapid reviews. *Implement Sci.* 2010;5:56. doi: 10.1186/1748-5908-5-56. PubMed PMID: 20642853; PubMed Central PMCID: PMCPMC2914085.
8. Watt A, Cameron A, Sturm L, Lathlean T, Babidge W, Blamey S, et al. Rapid versus full systematic reviews: validity in clinical practice? *ANZ J Surg.* 2008;78(11):1037-40. doi: 10.1111/j.1445-2197.2008.04730.x. PubMed PMID: 18959712.
9. Watt A, Cameron A, Sturm L, Lathlean T, Babidge W, Blamey S, et al. Rapid reviews versus full systematic reviews: an inventory of current methods and practice in health technology assessment. *Int J Technol Assess Health Care.* 2008;24(2):133-9. doi: 10.1017/S0266462308080185. PubMed PMID: 18400114.
10. Hailey DM. Health technology assessment in Canada: diversity and evolution. *Med J Aust.* 2007;187(5):286-8. PubMed PMID: 17767434.
11. Mallery C, Ganachari D, Fernandez J, Smeeding L, Robinson S, Moon M, et al. *Innovative Methods in Stakeholder Engagement: An Environmental Scan.* Rockville, MD: Agency for Healthcare Research and Quality; May 2012. <http://www.effectivehealthcare.ahrq.gov/index.cfm/tools-and-resources/how-to-get-involved-in-the-effective-health-care-program/>: 2012.
12. Concannon TW, Fuster M, Saunders T, Patel K, Wong JB, Leslie LK, et al. A systematic review of stakeholder engagement in comparative effectiveness and patient-centered outcomes research. *J Gen Intern Med.* 2014;29(12):1692-701. doi: 10.1007/s11606-014-2878-x. PubMed PMID: 24893581; PubMed Central PMCID: PMCPMC4242886.
13. Kreis J, Puhan MA, Schunemann HJ, Dickersin K. Consumer involvement in systematic reviews of comparative effectiveness research. *Health Expect.* 2013;16(4):323-37. doi: 10.1111/j.1369-7625.2011.00722.x. PubMed PMID: 22390732; PubMed Central PMCID: PMCPMC5060681.

14. Morley R, Norman G, Golder S, Griffith P. A systematic scoping review of the evidence for consumer involvement in organisations undertaking systematic reviews: focus on Cochrane. *Res Involvement Engagement*. 2016;2:36.
15. Boote J, Wong R, Booth A. 'Talking the talk or walking the walk?' A bibliometric review of the literature on public involvement in health research published between 1995 and 2009. *Health Expect*. 2015;18(1):44-57. doi: 10.1111/hex.12007. PubMed PMID: 23033933; PubMed Central PMCID: PMC5060762.
16. Lohr KN, Steinwachs DM. Health services research: an evolving definition of the field. *Health Serv Res*. 2002;37(1):7-9. PubMed PMID: 11949927.
17. Pollock A, Campbell P, Struthers C, Synnot A, Nunn J, Hill S, et al. Stakeholder involvement in systematic reviews: a protocol for a systematic review of methods, outcomes and effects. *Res Involvement Engagem*. 2017;3:9. doi: 10.1186/s40900-017-0060-4. PubMed PMID: 29062534; PubMed Central PMCID: PMC5611627.
18. Shea BJ, Grimshaw JM, Wells GA, Boers M, Andersson N, Hamel C, et al. Development of AMSTAR: a measurement tool to assess the methodological quality of systematic reviews. *BMC Med Res Methodol*. 2007;7:10. doi: 10.1186/1471-2288-7-10. PubMed PMID: 17302989; PubMed Central PMCID: PMC1810543.
19. McMaster University Hamilton (Canada) Health Evidence 2016 <http://www.healthevidence.org> Accessed 06.04.2016.
20. Mc Master Health Forum (McMaster University Hamilton (Canada)) Health Systems Evidence 2016 <https://www.healthsystemsevidence.org> Accessed 06.04.2016.
21. Moher D, Liberati A, Tetzlaff J, Altman DG, Grp P. Preferred Reporting Items for Systematic Reviews and Meta-Analyses: The PRISMA Statement. *Journal of Clinical Epidemiology*. 2009;62(10):1006-12. doi: 10.1016/j.jclinepi.2009.06.005. PubMed PMID: WOS:000270250500003.
22. Akl Elie A, Oxman Andrew D, Herrin J, Vist Gunn E, Terrenato I, Sperati F, et al. Framing of health information messages. *Cochrane Database of Systematic Reviews* [Internet]. 2011; (12). Available from: <http://onlinelibrary.wiley.com/doi/10.1002/14651858.CD006777.pub2/abstract>.
23. Bjelakovic G, Gluud Lise L, Nikolova D, Whitfield K, Krstic G, Wetterslev J, et al. Vitamin D supplementation for prevention of cancer in adults. *Cochrane Database of Systematic Reviews* [Internet]. 2014; (6). Available from: <http://onlinelibrary.wiley.com/doi/10.1002/14651858.CD007469.pub2/abstract>.
24. Carney T, Myers Bronwyn J, Louw J, Okwundu Charles I. Brief school-based interventions and behavioural outcomes for substance-using adolescents. *Cochrane Database of Systematic Reviews* [Internet]. 2014; (2). Available from: <http://onlinelibrary.wiley.com/doi/10.1002/14651858.CD008969.pub2/abstract>.
25. Chen W, Zhang Y, Li X, Yang G, Liu Jian P. Chinese herbal medicine for diabetic peripheral neuropathy. *Cochrane Database of Systematic Reviews* [Internet]. 2013; (10). Available from: <http://onlinelibrary.wiley.com/doi/10.1002/14651858.CD007796.pub3/abstract>.
26. Cheuk Daniel KL, Chiang Alan KS, Lee Tsz L, Chan Godfrey CF, Ha Shau Y. Vaccines for prophylaxis of viral infections in patients with hematological malignancies. *Cochrane Database of Systematic Reviews* [Internet]. 2011; (3). Available from: <http://onlinelibrary.wiley.com/doi/10.1002/14651858.CD006505.pub2/abstract>.
27. Fede G, Germani G, Gluud C, Gurusamy Kurinchi S, Burroughs Andrew K. Propylthiouracil for alcoholic liver disease. *Cochrane Database of Systematic Reviews* [Internet]. 2011; (6). Available from: <http://onlinelibrary.wiley.com/doi/10.1002/14651858.CD002800.pub3/abstract>.



- 1
  - 2
  - 3
  - 4
  - 5
  - 6
  - 7
  - 8
  - 9
  - 10
  - 11
  - 12
  - 13
  - 14
  - 15
  - 16
  - 17
  - 18
  - 19
  - 20
  - 21
  - 22
  - 23
  - 24
  - 25
  - 26
  - 27
  - 28
  - 29
  - 30
  - 31
  - 32
  - 33
  - 34
  - 35
  - 36
  - 37
  - 38
  - 39
  - 40
  - 41
  - 42
  - 43
  - 44
  - 45
  - 46
  - 47
  - 48
  - 49
  - 50
  - 51
  - 52
  - 53
  - 54
  - 55
  - 56
  - 57
  - 58
  - 59
  - 60
28. Fonner Virginia A, Denison J, Kennedy Caitlin E, O'Reilly K, Sweat M. Voluntary counseling and testing (VCT) for changing HIV-related risk behavior in developing countries. *Cochrane Database of Systematic Reviews* [Internet]. 2012; (9). Available from: <http://onlinelibrary.wiley.com/doi/10.1002/14651858.CD001224.pub4/abstract>.
29. Garrison Scott R, Allan GM, Sekhon Ravneet K, Musini Vijaya M, Khan Karim M. Magnesium for skeletal muscle cramps. *Cochrane Database of Systematic Reviews* [Internet]. 2012; (9). Available from: <http://onlinelibrary.wiley.com/doi/10.1002/14651858.CD009402.pub2/abstract>.
30. Jefferson T, Rivetti A, Di Pietrantonj C, Demicheli V, Ferroni E. Vaccines for preventing influenza in healthy children. *Cochrane Database of Systematic Reviews* [Internet]. 2012; (8). Available from: <http://onlinelibrary.wiley.com/doi/10.1002/14651858.CD004879.pub4/abstract>.
31. Jin H, Leng Q, Li C. Dietary flavonoid for preventing colorectal neoplasms. *Cochrane Database of Systematic Reviews* [Internet]. 2012; (8). Available from: <http://onlinelibrary.wiley.com/doi/10.1002/14651858.CD009350.pub2/abstract>.
32. Jorge Eliane C, Jorge Edson N, El Dib Regina P. Early light reduction for preventing retinopathy of prematurity in very low birth weight infants. *Cochrane Database of Systematic Reviews* [Internet]. 2013; (8). Available from: <http://onlinelibrary.wiley.com/doi/10.1002/14651858.CD000122.pub2/abstract>.
33. Junker Anders E, Als-Nielsen B, Gluud C, Gluud Lise L. Dopamine agents for hepatic encephalopathy. *Cochrane Database of Systematic Reviews* [Internet]. 2014; (2). Available from: <http://onlinelibrary.wiley.com/doi/10.1002/14651858.CD003047.pub3/abstract>.
34. Karmali Kunal N, Davies P, Taylor F, Beswick A, Martin N, Ebrahim S. Promoting patient uptake and adherence in cardiac rehabilitation. *Cochrane Database of Systematic Reviews* [Internet]. 2014; (6). Available from: <http://onlinelibrary.wiley.com/doi/10.1002/14651858.CD007131.pub3/abstract>.
35. Kwong Joey SW, Lau Hoi Lam C, Yeung F, Chau Pui H. Yoga for secondary prevention of coronary heart disease. *Cochrane Database of Systematic Reviews* [Internet]. 2015; (7). Available from: <http://onlinelibrary.wiley.com/doi/10.1002/14651858.CD009506.pub4/abstract>.
36. Lager Kate E, Mistri Amit K, Khunti K, Haunton Victoria J, Sett Aung K, Wilson Andrew D. Interventions for improving modifiable risk factor control in the secondary prevention of stroke. *Cochrane Database of Systematic Reviews* [Internet]. 2014; (5). Available from: <http://onlinelibrary.wiley.com/doi/10.1002/14651858.CD009103.pub2/abstract>.
37. Martí-Carvajal Arturo J, Knight-Madden Jennifer M, Martinez-Zapata Maria J. Interventions for treating leg ulcers in people with sickle cell disease. *Cochrane Database of Systematic Reviews* [Internet]. 2014; (12). Available from: <http://onlinelibrary.wiley.com/doi/10.1002/14651858.CD008394.pub3/abstract>.
38. Moi JH, Sriranganathan MK, Edwards CJ, Buchbinder R. Lifestyle interventions for acute gout. *Cochrane Database Syst Rev*. 2013;(11):CD010519. doi: 10.1002/14651858.CD010519.pub2. PubMed PMID: 24186771.
39. Nava F, Ghilotti F, Maggi L, Hatemi G, Del Bianco A, Merlo C, et al. Biologics, colchicine, corticosteroids, immunosuppressants and interferon-alpha for Neuro-Behçet's Syndrome. *Cochrane Database of Systematic Reviews* [Internet]. 2014; (12). Available from: <http://onlinelibrary.wiley.com/doi/10.1002/14651858.CD010729.pub2/abstract>.
40. Njei B, Kongnyuy Eugene J, Kumar S, Okwen Mbah P, Sankar Mari J, Mbuagbaw L. Optimal timing for antiretroviral therapy initiation in patients with HIV infection and concurrent cryptococcal meningitis. *Cochrane Database of Systematic Reviews* [Internet]. 2013; (2). Available from: <http://onlinelibrary.wiley.com/doi/10.1002/14651858.CD009012.pub2/abstract>.

- 1  
2  
3 41. Okwundu Charles I, Nagpal S, Musekiwa A, Sinclair D. Home- or community-based programmes  
4 for treating malaria. Cochrane Database of Systematic Reviews [Internet]. 2013; (5). Available  
5 from: <http://onlinelibrary.wiley.com/doi/10.1002/14651858.CD009527.pub2/abstract>.
- 6  
7 42. Olsen O, Clausen Jette A. Planned hospital birth versus planned home birth. Cochrane Database of  
8 Systematic Reviews [Internet]. 2012; (9). Available from:  
9 <http://onlinelibrary.wiley.com/doi/10.1002/14651858.CD000352.pub2/abstract>.
- 10  
11 43. Overdeest Gijsbert M, Jacobs W, Vleggeert-Lankamp C, Thomé C, Gunzburg R, Peul W.  
12 Effectiveness of posterior decompression techniques compared with conventional laminectomy  
13 for lumbar stenosis. Cochrane Database of Systematic Reviews [Internet]. 2015; (3). Available  
14 from: <http://onlinelibrary.wiley.com/doi/10.1002/14651858.CD010036.pub2/abstract>.
- 15  
16 44. Peckham Emily J, Nelson EA, Greenhalgh J, Cooper K, Roberts ER, Agrawal A. Homeopathy for  
17 treatment of irritable bowel syndrome. Cochrane Database of Systematic Reviews [Internet].  
18 2013; (11). Available from:  
19 <http://onlinelibrary.wiley.com/doi/10.1002/14651858.CD009710.pub2/abstract>.
- 20  
21 45. Rahimi-Movaghar A, Amin-Esmaili M, Hefazi M, Yousefi-Nooraie R. Pharmacological therapies for  
22 maintenance treatments of opium dependence. Cochrane Database of Systematic Reviews  
23 [Internet]. 2013; (1). Available from:  
24 <http://onlinelibrary.wiley.com/doi/10.1002/14651858.CD007775.pub2/abstract>.
- 25  
26 46. Shields L, Zhou H, Pratt J, Taylor M, Hunter J, Pascoe E. Family-centred care for hospitalised  
27 children aged 0-12 years. Cochrane Database of Systematic Reviews [Internet]. 2012; (10).  
28 Available from:  
29 <http://onlinelibrary.wiley.com/doi/10.1002/14651858.CD004811.pub3/abstract>.
- 30  
31 47. Smart Neil A, Marshall Belinda J, Daley M, Boulos E, Windus J, Baker N, et al. Low-fat diets for  
32 acquired hypercholesterolaemia. Cochrane Database of Systematic Reviews [Internet]. 2011; (2).  
33 Available from:  
34 <http://onlinelibrary.wiley.com/doi/10.1002/14651858.CD007957.pub2/abstract>.
- 35  
36 48. Taylor F, Huffman Mark D, Macedo Ana F, Moore Theresa HM, Burke M, Davey Smith G, et al.  
37 Statins for the primary prevention of cardiovascular disease. Cochrane Database of Systematic  
38 Reviews [Internet]. 2013; (1). Available from:  
39 <http://onlinelibrary.wiley.com/doi/10.1002/14651858.CD004816.pub5/abstract>.
- 40  
41 49. Taylor Matthew J, Rudkin L, Bullemor-Day P, Lubin J, Chukwujekwu C, Hawton K. Strategies for  
42 managing sexual dysfunction induced by antidepressant medication. Cochrane Database of  
43 Systematic Reviews [Internet]. 2013; (5). Available from:  
44 <http://onlinelibrary.wiley.com/doi/10.1002/14651858.CD003382.pub3/abstract>.
- 45  
46 50. Tejani Aaron M, Wasdell M, Spiwak R, Rowell G, Nathwani S. Carnitine for fatigue in multiple  
47 sclerosis. Cochrane Database of Systematic Reviews [Internet]. 2012; (5). Available from:  
48 <http://onlinelibrary.wiley.com/doi/10.1002/14651858.CD007280.pub3/abstract>.
- 49  
50 51. Thomas Roger E, Lorenzetti D, Spragins W. Mentoring adolescents to prevent drug and alcohol  
51 use. Cochrane Database of Systematic Reviews [Internet]. 2011; (11). Available from:  
52 <http://onlinelibrary.wiley.com/doi/10.1002/14651858.CD007381.pub2/abstract>.
- 53  
54 52. Agarwal R, Goldenberg M, Perry R, IsHak WW. The quality of life of adults with attention deficit  
55 hyperactivity disorder: a systematic review. *Innov Clin Neurosci*. 2012;9(5-6):10-21. PubMed  
56 PMID: 22808445; PubMed Central PMCID: PMC398685.
- 57  
58 53. Ahmed AA, Alsharief E, Alsharief A. Intensive versus conventional glycemic control: What is best  
59 for patients with type 2 diabetes? *Diabetes and Metabolic Syndrome: Clinical Research and*  
60 *Reviews*. 2013;7(1):48-51.



- 1
  - 2
  - 3
  - 4
  - 5
  - 6
  - 7
  - 8
  - 9
  - 10
  - 11
  - 12
  - 13
  - 14
  - 15
  - 16
  - 17
  - 18
  - 19
  - 20
  - 21
  - 22
  - 23
  - 24
  - 25
  - 26
  - 27
  - 28
  - 29
  - 30
  - 31
  - 32
  - 33
  - 34
  - 35
  - 36
  - 37
  - 38
  - 39
  - 40
  - 41
  - 42
  - 43
  - 44
  - 45
  - 46
  - 47
  - 48
  - 49
  - 50
  - 51
  - 52
  - 53
  - 54
  - 55
  - 56
  - 57
  - 58
  - 59
  - 60
54. Albrecht B, Staiger PK, Hall K, Miller P, Best D, Lubman DI. Benzodiazepine use and aggressive behaviour: A systematic review. *Australian and New Zealand Journal of Psychiatry*. 2014;48(12):1096-114.
55. Bak A, Browne J, Loveday HP, Tsiami A. Systematic review of nutritional interventions to prevent healthcare-associated infections in undernourished elderly. *Proceedings of the Nutrition Society*. 2013;72:E212.
56. Blasco MA, Redleaf MI. Cochlear implantation in unilateral sudden deafness improves tinnitus and speech comprehension: meta-analysis and systematic review. *Otology & neurotology : official publication of the American Otological Society, American Neurotology Society [and] European Academy of Otology and Neurotology*. 2014;35(8):1426-32.
57. Bourke L, Homer KE, Thaha MA, Steed L, Rosario DJ, Robb KA, et al. Interventions to improve exercise behaviour in sedentary people living with and beyond cancer: A systematic review. *British Journal of Cancer*. 2014;110(4):831-41.
58. Chien TJ, Liu CY, Chang YF, Fang CJ, Hsu CH. Acupuncture for treating aromatase inhibitor-related arthralgia in breast cancer: a systematic review and meta-analysis. *J Altern Complement Med*. 2015;21(5):251-60. PubMed PMID: 25915433.
59. Collins CE, Burrows TL, Bray J, Asher R, Young M, Morgan PJ. Effectiveness of parent-centred interventions for the prevention and treatment of childhood overweight and obesity in community settings: A systematic review. *JBIC Database of Systematic Reviews and Implementation Reports*. 2013;11(9):180-257.
60. Foersch M, Jacobs C, Wriedt S, Hechtner M, Wehrbein H. Effectiveness of maxillary protraction using facemask with or without maxillary expansion: a systematic review and meta-analysis. *Clinical Oral Investigations*. 2015;19(6):1181-92. doi: 10.1007/s00784-015-1478-4. PubMed PMID: 25982454.
61. Gibbs M, Winsper C, Marwaha S, Gilbert E, Broome M, Singh SP. Cannabis use and mania symptoms: A systematic review and meta-analysis. *European Psychiatry*. 2015;30:1128.
62. Guerin M, Grimmer K, Kumar S. Community services' involvement in the discharge of older adults from hospital into the community. *International Journal Of Integrated Care*. 2013;13:e032-e. PubMed PMID: 24179455.
63. Hu MB, Xu H, Bai PD, Jiang HW, Ding Q. Obesity has multifaceted impact on biochemical recurrence of prostate cancer: A dose-response meta-analysis of 36,927 patients. *Medical Oncology*. 2014;31(2).
64. Johantgen M, Fountain L, Zangaro G, Newhouse R, Stanik-Hutt J, White K. Comparison of labor and delivery care provided by certified nurse-midwives and physicians: a systematic review, 1990 to 2008. *Womens Health Issues*. 2012;22(1):e73-81. PubMed PMID: 21865056.
65. Lankhaar JA, de Vries WR, Jansen JA, Zelissen PM, Backx FJ. Impact of overt and subclinical hypothyroidism on exercise tolerance: a systematic review. *Res Q Exerc Sport*. 2014;85(3):365-89. PubMed PMID: 25141089.
66. Llewellyn A, Simmonds M, Owen CG, Woolacott N. Childhood obesity as a predictor of morbidity in adulthood: a systematic review and meta-analysis. *Obesity Reviews: An Official Journal Of The International Association For The Study Of Obesity*. 2015. doi: 10.1111/obr.12316. PubMed PMID: 26440472.
67. Maglione MA, Das L, Raaen L, Smith A, Chari R, Newberry S, et al. Safety of vaccines used for routine immunization of US children: A systematic review. *Pediatrics*. 2014;134(2):325-37.
68. Matsuda A, Yamaoka K, Tango T, Matsuda T, Nishimoto H. Effectiveness of psychoeducational

- support on quality of life in early-stage breast cancer patients: a systematic review and meta-analysis of randomized controlled trials. *Quality of life research : an international journal of quality of life aspects of treatment, care and rehabilitation*. 2014;23(1):21-30.
69. Panagioti M, Gooding PA, Triantafyllou K, Tarrrier N. Suicidality and posttraumatic stress disorder (PTSD) in adolescents: a systematic review and meta-analysis. *Social Psychiatry And Psychiatric Epidemiology*. 2015;50(4):525-37. doi: 10.1007/s00127-014-0978-x. PubMed PMID: 25398198.
70. Rodgers M, Asaria M, Walker S, McMillan D, Lucock M, Harden M, et al. The clinical effectiveness and cost-effectiveness of low-intensity psychological interventions for the secondary prevention of relapse after depression: A systematic review. *Health Technology Assessment*. 2012;16(28):1-129.
71. Rolka EJ, Silverman MJ. A systematic review of music and dyslexia. *Arts in Psychotherapy*. 2015;46:24-32.
72. Rozet F, Bastide C, Beuzeboc P, Cormier L, Fromont G, Hennequin C, et al. Prise en charge des tumeurs de la prostate a faible risque evolutif. *Prog Urol*. 2015;25(1):1-10. PubMed PMID: 25454776.
73. Rush CJ, Campbell RT, Jhund PS, Connolly EC, Preiss D, Gardner RS, et al. Falling Cardiovascular Mortality in Heart Failure With Reduced Ejection Fraction and Implications for Clinical Trials. *JACC: Heart Failure*. 2015;3(8):603-14.
74. Scott IC, Tan R, Stahl D, Steer S, Lewis CM, Cope AP. The protective effect of alcohol on developing rheumatoid arthritis: A systematic review and meta-analysis. *Rheumatology (United Kingdom)*. 2013;52(5):856-67.
75. Siffredi V, Anderson V, Leventer RJ, Spencer-Smith MM. Neuropsychological profile of agenesis of the corpus callosum: A systematic review. *Developmental Neuropsychology*. 2013;38(1):36-57.
76. Sipe TA, Finnie RKC, Knopf JA, Qu S, Reynolds JA, Thota AB, et al. Effects of mental health benefits legislation: A community guide systematic review. *American Journal of Preventive Medicine*. 2015;48(6):755-66.
77. Te Morenga L, Mallard S, Mann J. Dietary sugars and body weight: systematic review and meta-analyses of randomised controlled trials and cohort studies. *BMJ (Clinical Research Ed)*. 2012;346:e7492-e. doi: 10.1136/bmj.e7492. PubMed PMID: 23321486.
78. Tricco AC, Antony J, Khan PA, Ghassemi M, Hamid JS, Ashoor H, et al. Safety and effectiveness of dipeptidyl peptidase-4 inhibitors versus intermediate-acting insulin or placebo for patients with type 2 diabetes failing two oral antihyperglycaemic agents: a systematic review and network meta-analysis. *BMJ Open*. 2014;4(12):e005752. PubMed PMID: 25537781.
79. Vasconcellos F, Seabra A, Katzmarzyk PT, Kraemer-Aguiar LG, Bouskela E, Farinatti P. Physical activity in overweight and obese adolescents: systematic review of the effects on physical fitness components and cardiovascular risk factors. *Sports medicine (Auckland, NZ)*. 2014;44(8):1139-52.
80. Wang Z. Age-dependent decline of association between obesity and mortality: A systematic review and meta-analysis. *Obesity Research and Clinical Practice*. 2015;9(1):1-11.
81. Wu S, Cohen D, Shi Y, Pearson M, Sturm R. Economic analysis of physical activity interventions. *American Journal of Preventive Medicine*. 2011;40(2):149-58.
82. Sedation and Anesthesia Options for Diagnostic Procedures: A Review of Clinical Effectiveness and Guidelines. 2015. PubMed PMID: 26180868.
83. Attree P, French B, Milton B, Povall S, Whitehead M, Popay J. The experience of community engagement for individuals: a rapid review of evidence. *Health & Social Care In The Community*. 2011;19(3):250-60. doi: 10.1111/j.1365-2524.2010.00976.x. PubMed PMID: 21138495.

- 1
- 2
- 3 84. Barry MM, D'Eath M, Sixsmith J. Interventions for improving population health literacy: insights
- 4 from a rapid review of the evidence. *Journal Of Health Communication*. 2013;18(12):1507-22. doi:
- 5 10.1080/10810730.2013.840699. PubMed PMID: 24298885.
- 6
- 7 85. Beall RF, Baskerville N, Golfam M, Saeed S, Little J. Modes of delivery in preventive intervention
- 8 studies: A rapid review. *European Journal of Clinical Investigation*. 2014;44(7):688-96.
- 9
- 10 86. Beck CR, Sokal R, Arunachalam N, Puleston R, Cichowska A, Kessel A, et al. Neuraminidase
- 11 inhibitors for influenza: a review and public health perspective in the aftermath of the 2009
- 12 pandemic. *Influenza And Other Respiratory Viruses*. 2013;7 Suppl 1:14-24. doi: 10.1111/irv.12048.
- 13 PubMed PMID: 23279893.
- 14
- 15 87. Boyce T, Holmes A. Addressing Health Inequalities in the Delivery of the Human Papillomavirus
- 16 Vaccination Programme: Examining the Role of the School Nurse. *PLoS ONE*. 2012;7(9).
- 17
- 18 88. Brunton G, Paraskeva N, Caird J, Bird KS, Kavanagh J, Kwan I, et al. Psychosocial predictors,
- 19 assessment, and outcomes of cosmetic procedures: a systematic rapid evidence assessment.
- 20 *Aesthetic Plastic Surgery*. 2014;38(5):1030-40. doi: 10.1007/s00266-014-0369-4. PubMed PMID:
- 21 24962402.
- 22
- 23 89. Butow P, Price MA, Shaw JM, Turner J, Clayton JM, Grimison P, et al. Clinical pathway for the
- 24 screening, assessment and management of anxiety and depression in adult cancer patients:
- 25 Australian guidelines. *Psycho-Oncology*. 2015;24(9):987-1001.
- 26
- 27 90. Costello RB, Lentino CV, Boyd CC, O'Connell ML, Crawford CC, Sprengel ML, et al. The
- 28 effectiveness of melatonin for promoting healthy sleep: A rapid evidence assessment of the
- 29 literature. *Nutrition Journal*. 2014:106.
- 30
- 31 91. Crawford C, Lee C, Bingham J, Buckenmaier CC, Crawford P, Delgado R, et al. Sensory art therapies
- 32 for the self-management of chronic pain symptoms. *Pain Medicine (United States)*.
- 33 2014;15(S1):S66-S75.
- 34
- 35 92. Crawford C, Lee C, May T, Buckenmaier CC, Crawford P, Delgado R, et al. Physically oriented
- 36 therapies for the self-management of chronic pain symptoms. *Pain Medicine (United States)*.
- 37 2014;15(S1):S54-S65.
- 38
- 39 93. Dorresteijn PM, Ipenburg NA, Murphy KJ, Smit M, Van Vulpen JK, Wegner I, et al. Rapid systematic
- 40 review of normal audiometry results as a predictor for benign paroxysmal positional vertigo.
- 41 *Otolaryngology - Head and Neck Surgery (United States)*. 2014;150(6):919-24.
- 42
- 43 94. Geddes R, Frank J, Haw S. A rapid review of key strategies to improve the cognitive and social
- 44 development of children in Scotland. *Health Policy (Amsterdam, Netherlands)*. 2011;101(1):20-8.
- 45 doi: 10.1016/j.healthpol.2010.08.013. PubMed PMID: 20822824.
- 46
- 47 95. Hithersay R, Strydom A, Moulster G, Buszewicz M. Carer-led health interventions to monitor,
- 48 promote and improve the health of adults with intellectual disabilities in the community: a
- 49 systematic review. *Research In Developmental Disabilities*. 2014;35(4):887-907. doi:
- 50 10.1016/j.ridd.2014.01.010. PubMed PMID: 24495402.
- 51
- 52 96. Humphreys DK, Ogilvie D. Synthesising evidence for equity impacts of population-based physical
- 53 activity interventions: A pilot study. *International Journal of Behavioral Nutrition and Physical*
- 54 *Activity*. 2013;10.
- 55
- 56 97. Jiwa M, McManus A, Dadich A. Continuity of cancer care: Where do primary care practitioners fit
- 57 in? *Cancer Forum*. 2013;37(1):31-4.
- 58
- 59 98. Kreindler SA, Cui Y, Metge CJ, Raynard M. Patient characteristics associated with longer
- 60 emergency department stay: A rapid review. *Emergency Medicine Journal*. 2015.
99. Kwok E, Konnyu KJ, Skidmore B, Moher D. Effectiveness and safety of emergency department

- 1  
2  
3 short-stay units: A rapid review. *Canadian Journal of Emergency Medicine*. 2012;14:S5-S6.
- 4 100. Lal S, Adair CE. E-mental health: A rapid review of the literature. *Psychiatric Services*.  
5 2014;65(1):24-32.
- 6  
7 101. Lee C, Crawford C, Schoomaker E, Buckenmaier CC, Crawford P, Delgado R, et al. Movement  
8 therapies for the self-management of chronic pain symptoms. *Pain Medicine (United States)*.  
9 2014;15(S1):S40-S53.
- 10  
11 102. Lee C, Crawford C, Swann S. Multimodal, integrative therapies for the self-management of chronic  
12 pain symptoms. *Pain Medicine (Malden, Mass)*. 2014;15 Suppl 1:S76-S85. doi:  
13 10.1111/pme.12408. PubMed PMID: 24734863.
- 14  
15 103. Mann R, Gilbody S. Validity of two case finding questions to detect postnatal depression: a review  
16 of diagnostic test accuracy. *Journal Of Affective Disorders*. 2011;133(3):388-97. doi:  
17 10.1016/j.jad.2010.11.015. PubMed PMID: 21146230.
- 18  
19 104. McMurrin M. Individual-level interventions for alcohol-related violence: a rapid evidence  
20 assessment. *Criminal Behaviour And Mental Health: CBMH*. 2012;22(1):14-28. doi:  
21 10.1002/cbm.821. PubMed PMID: 21823184.
- 22  
23 105. Menear M, Briand C. Implementing a continuum of evidence-based psychosocial interventions for  
24 people with severe mental illness: part 1-review of major initiatives and implementation  
25 strategies. *Canadian Journal Of Psychiatry Revue Canadienne De Psychiatrie*. 2014;59(4):178-86.  
26 PubMed PMID: 25007110.
- 27  
28 106. Moe-Byrne T, Chambers D, Harden M, McDaid C. Behaviour change interventions to promote  
29 prescribing of generic drugs: a rapid evidence synthesis and systematic review. *BMJ Open*.  
30 2014;4(5):e004623-e. doi: 10.1136/bmjopen-2013-004623. PubMed PMID: 24833683.
- 31  
32 107. Muñoz K, Caballero A, White K. Effectiveness of questionnaires for screening hearing of school-  
33 age children: a comprehensive literature review. *International Journal Of Audiology*.  
34 2014;53(12):910-4. doi: 10.3109/14992027.2014.943846. PubMed PMID: 25140604.
- 35  
36 108. Ndumbe-Eyoh S, Moffatt H. Intersectoral action for health equity: a rapid systematic review. *BMC*  
37 *Public Health*. 2013;13:1056-. doi: 10.1186/1471-2458-13-1056. PubMed PMID: 24209299.
- 38  
39 109. Saeed S, Golfam M, Beall RF, Ashbury FD, Palmer LJ, Little J. Effectiveness of individual-focused  
40 interventions to prevent chronic disease. *European Journal Of Clinical Investigation*.  
41 2014;44(9):883-91. doi: 10.1111/eci.12298. PubMed PMID: 25041535.
- 42  
43 110. Trivedy CR, Cooke MW. Unscheduled Return Visits (URV) in adults to the Emergency Department  
44 (ED): A rapid evidence assessment policy review. *Emergency Medicine Journal*. 2015;32(4):324-9.
- 45  
46 111. Yu J, Wang Y, Li Y, Li X, Li C, Shen JT. The Da Vinci surgical system: A rapid review of the clinical and  
47 economic evidence. *Value in Health*. 2014;17(7):A798.
- 48  
49 112. Aerobic exercise training in patients with heart failure: a rapid review (Structured abstract).  
50 Health Technology Assessment Database [Internet]. 2015; (3). Available from:  
51 <http://onlinelibrary.wiley.com/doi/10.1111/hta.12298>.
- 52  
53 113. Criteria for referral to home care: a rapid review (Structured abstract). Health Technology  
54 Assessment Database [Internet]. 2015; (3). Available from:  
55 <http://onlinelibrary.wiley.com/doi/10.1111/hta.12298>.
- 56  
57 114. Physical activity counselling: a rapid review (Structured abstract). Health Technology Assessment  
58 Database [Internet]. 2015; (3). Available from:  
59 <http://onlinelibrary.wiley.com/doi/10.1111/hta.12298>.
- 60  
61 115. Care coordination for postacute stroke, chronic obstructive pulmonary disease, and heart failure

- clients: an economic rapid review (Structured abstract). Health Technology Assessment Database [Internet]. 2015; (3). Available from: <http://onlinelibrary.wiley.com/o/cochrane/clhta/articles/HTA-32015000492/frame.html>.
116. Sodium restriction in heart failure: a rapid review (Structured abstract). Health Technology Assessment Database [Internet]. 2015; (3). Available from: <http://onlinelibrary.wiley.com/o/cochrane/clhta/articles/HTA-32015000504/frame.html>.
117. Cognitive-behavioural therapy for anxiety and depression in patients with chronic obstructive pulmonary disease (COPD): a rapid review (Structured abstract). Health Technology Assessment Database [Internet]. 2015; (3). Available from: <http://onlinelibrary.wiley.com/o/cochrane/clhta/articles/HTA-32015000486/frame.html>.
118. Communication of discharge instructions: a rapid review (Structured abstract). Health Technology Assessment Database [Internet]. 2015; (3). Available from: <http://onlinelibrary.wiley.com/o/cochrane/clhta/articles/HTA-32015000500/frame.html>.
119. Prophylactic antibiotics for individuals with Chronic Obstructive Pulmonary Disease (COPD): a rapid review (Structured abstract). Health Technology Assessment Database [Internet]. 2015; (3). Available from: <http://onlinelibrary.wiley.com/o/cochrane/clhta/articles/HTA-32015000489/frame.html>.
120. Respiratory therapy services in home care for individuals with chronic obstructive pulmonary disease (COPD): a rapid review (Structured abstract). Health Technology Assessment Database [Internet]. 2015; (3). Available from: <http://onlinelibrary.wiley.com/o/cochrane/clhta/articles/HTA-32015000491/frame.html>.
121. Exercise programs after pulmonary rehabilitation for patients with chronic obstructive pulmonary disease (COPD): a rapid review (Structured abstract). Health Technology Assessment Database [Internet]. 2015; (3). Available from: <http://onlinelibrary.wiley.com/o/cochrane/clhta/articles/HTA-32015000488/frame.html>.
122. Baidoobonso S. Effect of supportive interventions on informal caregivers of people at the end of life: a rapid review (Structured abstract). Health Technology Assessment Database [Internet]. 2014; (3). Available from: <http://onlinelibrary.wiley.com/o/cochrane/clhta/articles/HTA-32015000095/frame.html>.
123. Brener S. Optimal timing to begin an active rehabilitation program after a hip fracture: a rapid review (Structured abstract). Health Technology Assessment Database [Internet]. 2013; (3). Available from: <http://onlinelibrary.wiley.com/o/cochrane/clhta/articles/HTA-32014001040/frame.html>.
124. Brener S. Effectiveness and safety of thrombolytics for the treatment of ischemic stroke: a rapid review (Structured abstract). Health Technology Assessment Database [Internet]. 2013; (3). Available from: <http://onlinelibrary.wiley.com/o/cochrane/clhta/articles/HTA-32014001030/frame.html>.
125. Bungay H, Vella-Burrows T. The effects of participating in creative activities on the health and well-being of children and young people: a rapid review of the literature (Provisional abstract). Perspectives in Public Health [Internet]. 2013; 133(1):[44-52 pp.]. Available from: <http://onlinelibrary.wiley.com/o/cochrane/cldare/articles/DARE-12013008651/frame.html>  
<http://rsh.sagepub.com/content/133/1/44.full.pdf>.
126. Ghazipura M. Optimal timing for antibiotic administration in patients with community-acquired pneumonia: a rapid review (Structured abstract). Health Technology Assessment Database [Internet]. 2013; (3). Available from: <http://onlinelibrary.wiley.com/o/cochrane/clhta/articles/HTA-32014001051/frame.html>.



- 1  
2  
3 127. Ghazipura M. Community versus inpatient rehabilitation in hip fracture patients: a rapid review  
4 (Structured abstract). Health Technology Assessment Database [Internet]. 2013; (3). Available  
5 from: [http://onlinelibrary.wiley.com/o/cochrane/clhta/articles/HTA-](http://onlinelibrary.wiley.com/o/cochrane/clhta/articles/HTA-32014001045/frame.html)  
6 [32014001045/frame.html](http://onlinelibrary.wiley.com/o/cochrane/clhta/articles/HTA-32014001045/frame.html).
- 7  
8 128. Ghazipura M. Cardiovascular and aerobic exercise in postacute stroke patients: a rapid review  
9 (Structured abstract). Health Technology Assessment Database [Internet]. 2015; (3). Available  
10 from: [http://onlinelibrary.wiley.com/o/cochrane/clhta/articles/HTA-](http://onlinelibrary.wiley.com/o/cochrane/clhta/articles/HTA-32015000494/frame.html)  
11 [32015000494/frame.html](http://onlinelibrary.wiley.com/o/cochrane/clhta/articles/HTA-32015000494/frame.html).
- 12  
13 129. Ghazipura M. Home-based versus centre-based rehabilitation for community-dwelling postacute  
14 stroke patients: an economic rapid review (Structured abstract). Health Technology Assessment  
15 Database [Internet]. 2015; (3). Available from:  
16 <http://onlinelibrary.wiley.com/o/cochrane/clhta/articles/HTA-32015000493/frame.html>.
- 17  
18 130. Kabali C. Self-management and educational interventions in the postacute stroke population: a  
19 rapid review (Structured abstract). Health Technology Assessment Database [Internet]. 2015; (3).  
20 Available from: [http://onlinelibrary.wiley.com/o/cochrane/clhta/articles/HTA-](http://onlinelibrary.wiley.com/o/cochrane/clhta/articles/HTA-32015000498/frame.html)  
21 [32015000498/frame.html](http://onlinelibrary.wiley.com/o/cochrane/clhta/articles/HTA-32015000498/frame.html).
- 22  
23 131. Lambrinos A. Preoperative consultation: a rapid review (Structured abstract). Health Technology  
24 Assessment Database [Internet]. 2014; (3). Available from:  
25 <http://onlinelibrary.wiley.com/o/cochrane/clhta/articles/HTA-32014001064/frame.html>.
- 26  
27 132. Lambrinos A. Medication reconciliation at discharge: a rapid review (Structured abstract). Health  
28 Technology Assessment Database [Internet]. 2015; (3). Available from:  
29 <http://onlinelibrary.wiley.com/o/cochrane/clhta/articles/HTA-32015000507/frame.html>.
- 30  
31 133. Lambrinos A. Home-based exercise programs in heart failure: a rapid review (Structured abstract).  
32 Health Technology Assessment Database [Internet]. 2015; (3). Available from:  
33 <http://onlinelibrary.wiley.com/o/cochrane/clhta/articles/HTA-32015000506/frame.html>.
- 34  
35 134. Ling D. Role of screening for respiratory syncytial virus or influenza and empirical antiviral  
36 treatment for patients with community-acquired pneumonia: a rapid review (Structured  
37 abstract). Health Technology Assessment Database [Internet]. 2013; (3). Available from:  
38 <http://onlinelibrary.wiley.com/o/cochrane/clhta/articles/HTA-32014001055/frame.html>.
- 39  
40 135. McCurdy BR. Inhospital physiotherapy for acute exacerbations of chronic obstructive pulmonary  
41 disease (AECOPD): a rapid review (Structured abstract). Health Technology Assessment Database  
42 [Internet]. 2013; (3). Available from:  
43 <http://onlinelibrary.wiley.com/o/cochrane/clhta/articles/HTA-32014001027/frame.html>.
- 44  
45 136. McCurdy BR. Action plans for individuals with chronic obstructive pulmonary disease (COPD): a  
46 rapid review (Structured abstract). Health Technology Assessment Database [Internet]. 2013; (3).  
47 Available from: [http://onlinelibrary.wiley.com/o/cochrane/clhta/articles/HTA-](http://onlinelibrary.wiley.com/o/cochrane/clhta/articles/HTA-32014001026/frame.html)  
48 [32014001026/frame.html](http://onlinelibrary.wiley.com/o/cochrane/clhta/articles/HTA-32014001026/frame.html).
- 49  
50 137. Miani C, Ball S, Pitchforth E, Exley J, King S, Roland M, et al. Organisational interventions to reduce  
51 length of stay in hospital: a rapid evidence assessment (Structured abstract). Health Technology  
52 Assessment Database [Internet]. 2014; (3). Available from:  
53 <http://onlinelibrary.wiley.com/o/cochrane/clhta/articles/HTA-32014001458/frame.html>.
- 54  
55 138. Nikitovic M. Intensity of rehabilitation after hip fracture: a rapid review (Structured abstract).  
56 Health Technology Assessment Database [Internet]. 2013; (3). Available from:  
57 <http://onlinelibrary.wiley.com/o/cochrane/clhta/articles/HTA-32014001044/frame.html>.
- 58  
59 139. Schaink A. The effectiveness of statins for primary prevention: a rapid review (Structured  
60 abstract). Health Technology Assessment Database [Internet]. 2013; (3). Available from:

- 1  
2  
3 <http://onlinelibrary.wiley.com/o/cochrane/clhta/articles/HTA-32014001037/frame.html>.
- 4 140. Wang M. Airway clearance techniques for patients with stable chronic obstructive pulmonary  
5 disease (COPD): a rapid review (Structured abstract). Health Technology Assessment Database  
6 [Internet]. 2015; (3). Available from:  
7 <http://onlinelibrary.wiley.com/o/cochrane/clhta/articles/HTA-32015000487/frame.html>.
- 8  
9 141. Wang M. Pulmonary rehabilitation in the home versus other settings for individuals with chronic  
10 obstructive pulmonary disease (COPD): a rapid review (Structured abstract). Health Technology  
11 Assessment Database [Internet]. 2015; (3). Available from:  
12 <http://onlinelibrary.wiley.com/o/cochrane/clhta/articles/HTA-32015000495/frame.html>.
- 13  
14 142. Cottrell E, Whitlock E, Kato E, Uhl S, Belinson S, Chang C, et al. Defining the Benefits of  
15 Stakeholder Engagement in Systematic Reviews. AHRQ Methods for Effective Health Care.  
16 Rockville (MD)2014.
- 17  
18 143. Keown K, Van Eerd D, Irvin E. Stakeholder engagement opportunities in systematic reviews:  
19 knowledge transfer for policy and practice. J Contin Educ Health Prof. 2008;28(2):67-72. doi:  
20 10.1002/chp.159. PubMed PMID: 18521874.
- 21  
22 144. Tricco AC, Zarin W, Ghassemi M, Nincic V, Lillie E, Page MJ, et al. Same family, different species:  
23 methodological conduct and quality varies according to purpose for five types of knowledge  
24 synthesis. J Clin Epidemiol. 2017. doi: 10.1016/j.jclinepi.2017.10.014. PubMed PMID: 29103958.
- 25  
26 145. Turner L, Galipeau J, Garritty C, Manheimer E, Wieland LS, Yazdi F, et al. An evaluation of  
27 epidemiological and reporting characteristics of complementary and alternative medicine (CAM)  
28 systematic reviews (SRs). PLoS One. 2013;8(1):e53536. doi: 10.1371/journal.pone.0053536.  
29 PubMed PMID: 23341949; PubMed Central PMCID: PMC3544927.
- 30  
31  
32  
33  
34  
35  
36  
37  
38  
39  
40  
41  
42  
43  
44  
45  
46  
47  
48  
49  
50  
51  
52  
53  
54  
55  
56  
57  
58  
59  
60

1  
2  
3 **Supplementary files**  
4  
5

6  
7  
8 **File S1. Study protocol**  
9

10 **File S2. STROBE checklist**  
11

12 **Table S1. References of excluded studies**  
13

14 **Table S2. Overview of reviews of health services research, 2011 to 2015**  
15  
16  
17  
18  
19  
20  
21  
22  
23  
24  
25  
26  
27  
28  
29  
30  
31  
32  
33  
34  
35  
36  
37  
38  
39  
40  
41  
42  
43  
44  
45  
46  
47  
48  
49  
50  
51  
52  
53  
54  
55  
56  
57  
58  
59  
60



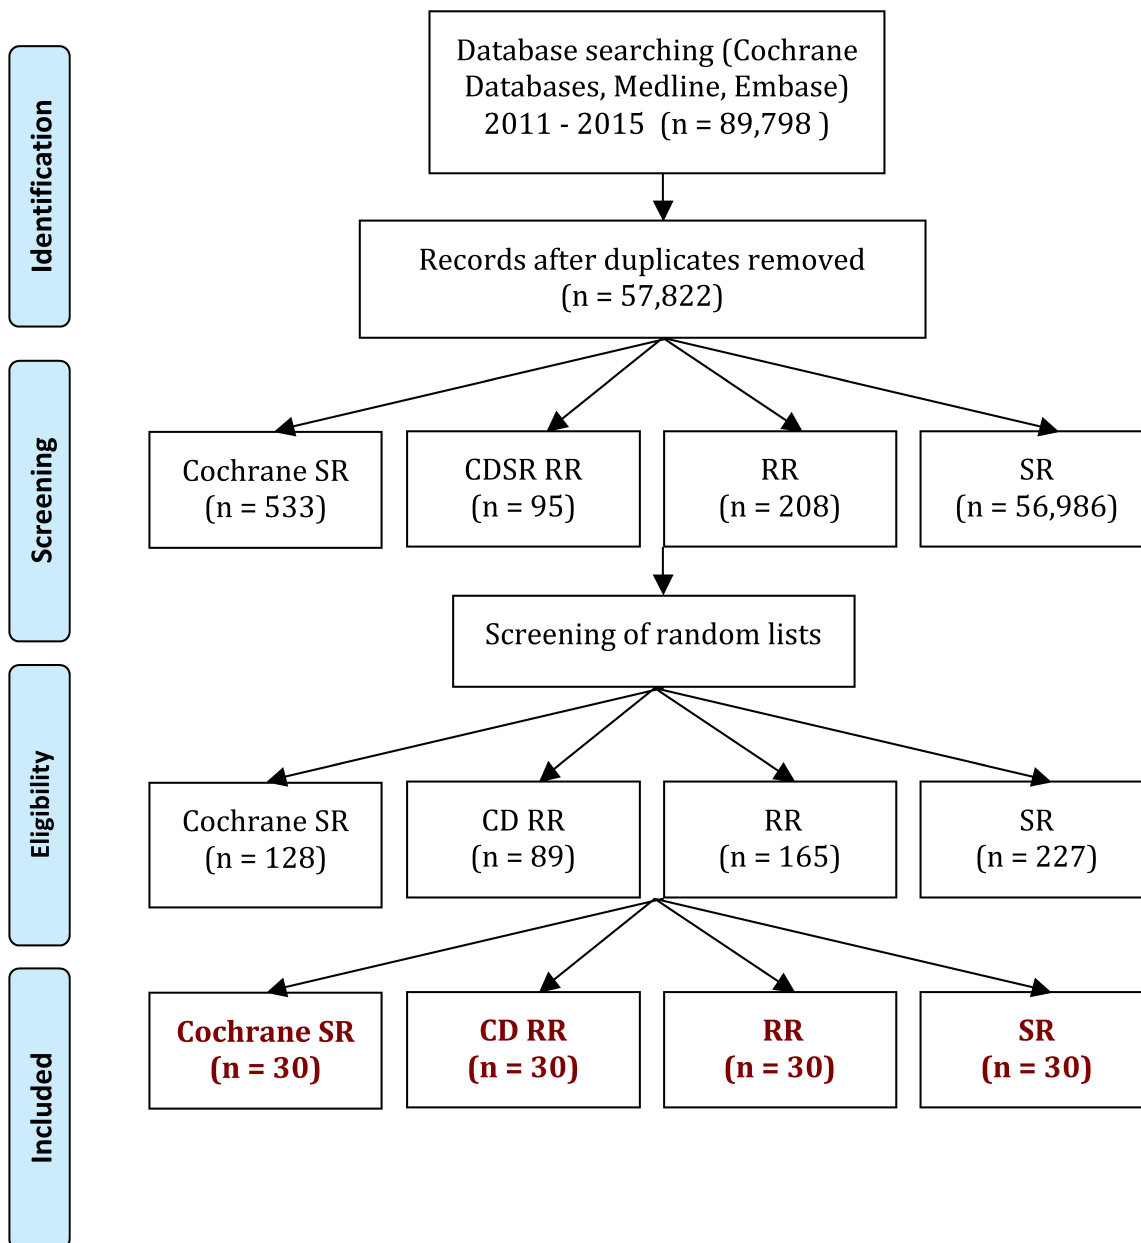

# Stakeholder involvement in systematic and rapid reviews of health services research

Protocol version 2

## 1. Background

### *Description of full systematic reviews (SR) and rapid reviews (RR)*

According to the Cochrane handbook (1), a traditional systematic review is a review that “attempts to collate all empirical evidence that fits pre-specified eligibility criteria in order to answer a specific research question. It uses explicit, systematic methods that are selected with a view to minimizing bias, thus providing more reliable findings from which conclusions can be drawn and decisions made”. While systematic reviews are considered to be the gold standard in knowledge synthesis, they are not without their limitations. For example, they usually require between 6 months and 2 years to complete and often focus on a narrow clinical question or set of questions. (2)

The key characteristics of a systematic review are (a) a clearly stated set of objectives with an explicit, reproducible methodology; (b) a systematic search that attempts to identify all studies that would meet the eligibility criteria; (c) an assessment of the validity of the findings of the included studies (e.g., assessment of risk of bias and confidence in cumulative estimates); and (d) systematic presentation, and synthesis, of the characteristics and findings of the included studies. (3) Systematic reviews should build on a protocol that describes the rationale, hypothesis, and planned methods of the review; few reviews report whether a protocol exists. Detailed, well-described protocols can facilitate the understanding and appraisal of the review methods, as well as the detection of modifications to methods and selective reporting in completed reviews (4).

Full systematic reviews (SR) and rapid reviews (RR) are two types of systematic reviews. They are often distinguished by the shorter time frame needed to produce a RR final report as well as by its less complex research topic (5): “Rapid reviews streamline traditional systematic review methods in order to synthesize evidence within a shortened timeframe” (6). As shown by Watt et al. RR did not have to be inherently inferior to SR despite “axiomatic differences” (7). He found that their conclusions did not differ much for similar research questions. However, SRs included methodologically more broader information, e.g. on economic evaluations or health service impact as well as more in-depth results, e.g. on clinical outcomes (8).

For SRs comprehensive guidance exists, e.g. based on the Cochrane Handbook (1). On the other hand, there is no standardized methodology for RRs and needs for at minimum increased transparency in reporting have been identified (5, 7).

R Rs were often considered to target specific policy questions or to be tailored to a mandate or to the intended end-users (7). Therefore, they are often performed to inform decision making or commissioned by health policy makers.

Description of format contents: PICO or according to PRISMA.

### ***Description of stakeholder involvement***

Stakeholders represent decision- and policy-makers and institutions responsible for the selection and implementation of health policies, HTAs, guidelines or end-users. Experts in the respective field are not considered as stakeholders except if they contribute in the policy-planning as described above. It is also known that stakeholders often represent more than one perspective. Concannon et al. described the 7Ps of stakeholders: patients and the public, providers, purchasers, payers, policy makers, product makers, principal investigators (9)

The U.S. EHC Program defined a “stakeholder” as a person or group with a vested interest in a particular clinical decision and the evidence that supports that decision, including:

- Patients, caregivers, and patient advocacy organizations
- Clinicians and their professional associations
- Institutional health care providers, such as hospital systems and medical clinics
- Government agencies
- Purchasers and payers, such as employers and public and private insurers
- Health care industry representatives
- Health care policymakers at the Federal, State and local levels
- Health care researchers and research institutions.

In general stakeholders might be engaged in evidence prioritization, e.g. proposing the title of a systematic review, setting research priorities, in evidence generation, such as performing trials and observational studies, in evidence synthesis, e.g. SR, RR, meta-analysis, in evidence integration, such as modeling, mapping gaps and evidence or cost effectiveness or in evidence dissemination and application, e.g. implementation formats or feedback assessment. Therefore, engagement of stakeholders may not only direct the targeted research topics but also influence the quality and dissemination of study results (9).

At what stages stakeholders can be involved in during the systematic review process? Cottrell et al. identified six categories where the systematic review might benefit: establishing credibility, anticipating controversy, ensuring transparency and accountability, improving relevance and enhancing quality as well as increasing dissemination and uptake of systematic review findings (10). Several challenges to involve stakeholders were determined. They include limited time and resources, skills of researcher to engage stakeholders, finding the right people, balancing multiple inputs and understanding the most appropriate time in the review process to engage different types of stakeholders (10). On the other hand, factors for successful stakeholder engagement included a-priori clarification of the expectations, the roles, types of activities, early engagement in the process, ongoing relationships to build trust and credibility, equality of different stakeholders, tentative inclusion of a trained facilitator and sensitivity to tight timelines (11).

Methods for identifying, selecting, contacting and engaging stakeholders might differ.

Furthermore, characteristics of stakeholders themselves are important, e.g. their intensity and modes of engagement may vary according to their interests and expectations, their roles and

1  
2  
3 their level of power and influence (11). To date there have been few efforts to measure the  
4 benefits/tradeoffs of specific stakeholder engagement processes or differing approaches to  
5 selecting and engaging differing stakeholder types (10-13).  
6  
7

8 Of all phases of the systematic review, the topic refinement and developing the key questions  
9 was repeatedly identified as the point where stakeholder engagement yielded the greatest  
10 benefit (10).  
11  
12  
13

### 14 ***Definition of health services research***

15 See Appendix 1.  
16  
17  
18

### 19 ***Relevance of this study***

20 Systematic reviews may benefit from involving stakeholders, but less is known about the  
21 practice, e.g. the proportion of involved stakeholders in recently published SRs and RRs and  
22 their type(s) and benefits of engagement in the process of a SR or RR. This information is  
23 considered to be relevant for the implementation and/or acceptance of SRs and RRs.  
24  
25  
26  
27  
28

## 29 **2. Objectives**

30 Our aims are to assess, reflect and compare the current international practice of involving  
31 stakeholders in published full systematic reviews (SR) and in rapid reviews (RR) in the field of  
32 health services research.  
33  
34  
35  
36

## 37 **3. Methods**

### 38 ***Sample size considerations***

39 Sample size considerations are guided by practical reasons and resources available. As the  
40 power of the two proportions is expected to be sufficiently high anyway, due to the big expected  
41 difference of the two proportions reporting stakeholder involvement. We consider a proportion  
42 of 0.70 for RRs and of 0.25 for SRs. This results in a minimal expected difference of 0.45.  
43  
44  
45  
46

47 Two groups with N=25 per group show an estimated power of 0.88 and an alpha of 0.023.

48 To account for potential subgroup analysis, we include a sample of N=30 systematic reviews per  
49 group, with 4 groups (SRs, RRs and Cochrane SRs, Cochrane additional database RRs). This  
50 allows us to include a maximum of six predictors in the analysis when we perform two-group  
51 comparisons.  
52  
53  
54

55 We will proceed according to the STROBE guidelines as far as they are applicable.  
56  
57  
58

### 59 ***Groups to be studied ("study population")***

60 *Full systematic reviews:*

Two groups will be studied:

1. Full systematic reviews in general: self-declaration as SR within the title or Methods section of the article or registration as such in the databases searched.
2. Cochrane systematic reviews: SRs are performed according to the Cochrane handbook (1). They are registered, supervised and released within a Cochrane Review Group. They represent the gold standard.

These two groups are selected as they are expected to differ with respect to their transparency of conduct and quality assessment.

#### *Rapid reviews:*

Rapid reviews articles will be identified on the basis of the respective self-declaration within the title, Methods section of the abstract or registration as such in the databases searched.

As there is heterogeneity regarding methodology, different terms might be used, e.g. rapid review, rapid method, rapid evidence, rapid synthesis or evidence summary.

#### *Inclusion criteria:*

- titled as systematic review or rapid review or reported as such in the objective or method section of the abstract, respectively, or registered as such in the database searched
- studies including rapid review methodology as one part of the overall study
- published between January, 2011 and December, 2015 (it is most crucial to be sure to include sufficient RRs)
- targeting a health services research topic as included in the title or abstract of the article based on the definition provided in Appendix 1

#### *Exclusion criteria:*

- designed to assess exclusively economic or cost analysis as described in the title or abstract
- performing a review or overview of reviews
- describing a protocol of a systematic review
- efficacy studies, clinical trials phases I to III, epidemiological studies to assess determinants or risk factors, economic analyses, non-human studies, establishment of databases or registries
- unclear design or description of the intervention

The inclusion and exclusion criteria are presented in Appendix 2.

#### ***Targeted stakeholders***

We will assess any kind of stakeholder involvement. In addition we will record the following groups of stakeholders:

- Institutional health care providers, such as hospitals and community services

- Government agencies
- Health care policymakers at the Federal, State and local levels

## 4. Outcomes

### *Primary outcomes:*

- to assess any kind of stakeholder involvement: yes or no
- to assess type(s) of stakeholders involved, e.g. decision- or policy-maker, experts involved in policy-planning, such as institutional health care providers or community services
- to determine phase(s)-related contribution(s) of stakeholders, e.g. developing the research question, literature search, study relevance (quality assessment), formulating or judging recommendations etc.

in recently published SRs and RRs.

### *Secondary outcomes:*

- to evaluate some potential predictors: type and topic of included studies, study population, setting (individual, population group, population, policy) and overall quality score
- to assess reported adverse effects or barriers of stakeholder involvement
- to verify stakeholder involvement
- to report publication issues, such as presence of a review protocol, institutional background of the authors, e.g. specialized in evidence synthesis, year of publication, stakeholder included as key word, dissemination information

## 5. Data collection

### *Databases to be searched:*

- The following databases will be searched:  
Biomedical/Health: Ovid Medline, Embase. Within the search strategy Cochrane SRs will be excluded.
- Cochrane library (for Cochrane SRs) and Cochrane additional databases (for RRs, e.g. DARE reviews, named as CD RR)

The search strategy will be presented in Appendix 1.

### *Selection of studies*

Following the searches in the targeted databases all results of the corresponding systematic review type (SR, RR, Cochrane SR, CD RR) will be pooled and duplicates excluded. These lists will be ordered randomly using the statistical program package R and will be exported to an excel file. The resulting lists will enter the study screening.

### ***Screening of studies***

In consecutive order, the randomly ordered references of each group of systematic reviews (SR, RR, Cochrane) will be checked for the general information and the inclusion and exclusion criteria (Appendix 2) until a total of 30 studies are included for each group.

One review authors (JF) will independently screen titles and abstracts for general information, inclusion and exclusion, cross-checked by MM. Inconsistencies or disagreement will be resolved through discussion and with consultation of another review author (MP) where necessary. The process of study selection will be carefully recorded in order to complete the PRISMA-flow diagram.

### ***Data extraction and management***

We will use a data collection form for study characteristics and outcome data which has been piloted on two reviews, one SR and one RR. One author, JF, performs full text extraction, supervised and spot-checked by a second researcher, MM. Within the full text article every step of the review will be checked for stakeholder involvement. We will resolve disagreements by consensus or by involving a third review author (MP).

Regarding Cochrane SRs, the protocol (and not the full text article) will be checked for stakeholder involvement as the protocol is relevant for performing the SR.

In addition to the screening form in Appendix 2 we will extract the following data:

- Institution performing the systematic review and contact details of the corresponding author
- Specific topic and intervention within the field of health services research
- Setting: population, population group, individual, policy; major characteristics of the population (overall N, age range or groups, sex)
- Funding for systematic review and notable conflicts of interest of authors
- Stakeholder involvement: any, number, type(s) and phase(s) of involvement, mentioned as key word
- Methodological quality assessment using the AMSTAR tool

All data will enter an Excel file.

To confirm the presented stakeholder involvement and to ask for reasons, whether benefits of stakeholder involvement were measured and about dissemination, the contact author of the included articles will be contacted by emails with pre-formulated questions. It will be indicated that this information will be used for a publication but only summarized and anonymously.

Contact authors will be sent one reminder in case of missing responses.

If feasible, two experts in the field will be contacted to review and comment this protocol and to contribute to the final article in order to ensure generalizability and transparency.

We will conduct this study according to this protocol and report deviations from it in the 'Differences between protocol and review' section.

### Potential for bias conducting this overview

- selection bias, e.g. regarding year of publication, no search for grey literature
- reporting bias, e.g. incomplete reporting, no study protocol

## 6. Data analysis

There will be a narrative description of the synthesis.

We will assess the overall proportion of stakeholder involvement as well as within subgroups and according to the outcomes described. We will compare the proportion of stakeholders involved between groups using the non-parametric Wilcoxon rank sum test.

The results of the AMSTAR assessment will be entered as a score.

### Differences between protocol and review

Will be listed if applicable.

### Conflicts of interest

None.

### Sources of support and funding

Involved authors: Jonas Feldmann (JF), Margot Mutsch (MM), Milo Alan Puhan (MP)

Internal sources

- Epidemiology, Biostatistics and Prevention Institute, University of Zurich, Zurich Switzerland

This is the host institution for the majority of the authors.

This work is part of the Master thesis of Jonas Feldmann.



## References

1. Higgins J, Green Se. Cochrane Handbook for Systematic Reviews of Interventions Version 5.1.0 [updated March 2011]. . Collaboration TC, editor. Available from <http://www.cochrane-handbook.org.2011>.
2. Khangura S, Konnyu K, Cushman R, Grimshaw J, Moher D. Evidence summaries: the evolution of a rapid review approach. *Syst Rev.* 2012;1:10.
3. Shamseer L, Moher D, Clarke M, Gherzi D, Liberati A, Petticrew M, et al. Preferred reporting items for systematic review and meta-analysis protocols (PRISMA-P) 2015: elaboration and explanation. *BMJ.* 2015;349:g7647.
4. Moher D, Shamseer L, Clarke M, Gherzi D, Liberati A, Petticrew M, et al. Preferred reporting items for systematic review and meta-analysis protocols (PRISMA-P) 2015 statement. *Syst Rev.* 2015;4:1.
5. Polisena J, Garritty C, Kamel C, Stevens A, Abou-Setta AM. Rapid review programs to support health care and policy decision making: a descriptive analysis of processes and methods. *Syst Rev.* 2015;4:26.
6. Ganann R, Ciliska D, Thomas H. Expediting systematic reviews: methods and implications of rapid reviews. *Implement Sci.* 2010;5:56.
7. Watt A, Cameron A, Sturm L, Lathlean T, Babidge W, Blamey S, et al. Rapid versus full systematic reviews: validity in clinical practice? *ANZ J Surg.* 2008;78(11):1037-40.
8. Watt A, Cameron A, Sturm L, Lathlean T, Babidge W, Blamey S, et al. Rapid reviews versus full systematic reviews: an inventory of current methods and practice in health technology assessment. *Int J Technol Assess Health Care.* 2008;24(2):133-9.
9. Concannon TW, Fuster M, Saunders T, Patel K, Wong JB, Leslie LK, et al. A systematic review of stakeholder engagement in comparative effectiveness and patient-centered outcomes research. *J Gen Intern Med.* 2014;29(12):1692-701.
10. Cottrell E, Whitlock E, Kato E, Uhl S, Belinson S, Chang C, et al. Defining the Benefits of Stakeholder Engagement in Systematic Reviews. *AHRQ Methods for Effective Health Care.* Rockville (MD)2014.
11. O'Haire C, McPheeters M, Nakamoto E, LaBrant L, Most C, Lee K, et al. Engaging Stakeholders To Identify and Prioritize Future Research Needs. *AHRQ Methods for Effective Health Care.* Rockville (MD)2011.
12. Keown K, Van Eerd D, Irvin E. Stakeholder engagement opportunities in systematic reviews: knowledge transfer for policy and practice. *J Contin Educ Health Prof.* 2008;28(2):67-72.
13. Kreis J, Puhan MA, Schunemann HJ, Dickersin K. Consumer involvement in systematic reviews of comparative effectiveness research. *Health Expect.* 2013;16(4):323-37.

## Appendix 1: Definition of health services research and search strategy (Ovid Medline)

### *Search strategy*

#### **Systematic reviews:**

- Cochrane Database: “systematic review” (title or abstract)
- Ovid Medline and Embase: “systematic review” (ti, ab), excluding “Cochrane” in title or abstract.
- No language restriction
- Published between January, 2011 and December, 2015

#### **Rapid reviews:**

- Terms: “rapid systematic review”, “rapid review”, “rapid evidence assessment” or “rapid health technology assessment” in title or abstract
- No language restriction
- Published between January, 2011 and December, 2015

### *Definition of health services research*

#### **No longer available:**

**Fields of health services research as defined by the Swiss Academy of Medical Sciences (SAMW)** (<http://www.samw.ch/de/Forschung/Versorgungsforschung/Kriterien.html>):

\*Adaptiert nach (Zugriff 28.11.11)

[www.bundesaerztekammer.de/page.asp?his=0.6.3289.3293.3295&all=true](http://www.bundesaerztekammer.de/page.asp?his=0.6.3289.3293.3295&all=true)

#### **Replaced by:**

Lohr KN, Steinwachs DM. Health services research: an evolving definition of the field. *Health Serv Res.* 2002;37(1):7-9. PubMed PMID: 11949927:

“Health services research is the multidisciplinary field of scientific investigation that studies how social factors, financing systems, organizational structures and processes, health technologies, and personal behaviors affect access to health care, the quality and cost of health care, and ultimately, our health and well-being. Its research domains are individuals, families, organizations, institutions, communities, and populations.”

Health Technology Assessments (HTAs) targeting effectiveness as well as meta-analyses and systematic reviews for effectiveness and utility, pharmaceutical trials under everyday conditions, basic research in care-related fields, quality research, methodological developments in the field of health services research, the development and application of new technologies (e-health) and the implementation of knowledge into the clinical practice were included. We excluded studies that focused exclusively on economic or cost analyses, performed a narrative review, an overview of reviews or a protocol of a systematic review. Efficacy studies without assessing the quality of life, clinical efficacy trials phases I to III, epidemiological studies to assess determinants or risk factors, non-human studies, establishment of databases or registries, studies with unclear design or description of the intervention were also excluded.

## Appendix 2: Screening of general information and check for inclusion and exclusion

### General information

|                             |                |                      |
|-----------------------------|----------------|----------------------|
| Study ID:                   | Report ID:     | Data form completed: |
| First author:               | Year of study: | Version number:      |
| Citation:                   |                |                      |
| Publication type (specify): |                |                      |

### Inclusion and exclusion criteria

#### A) For full systematic reviews

| Inclusion criteria:                                                                                                                             | Criteria fulfilled?<br>Please tick. |    |
|-------------------------------------------------------------------------------------------------------------------------------------------------|-------------------------------------|----|
|                                                                                                                                                 | Yes                                 | No |
| Is the article titled as systematic review or designed as such in the method section of the abstract or registered as such within the database? |                                     |    |
| Is the article published (at least online) between January, 2010 and August, 2015?                                                              |                                     |    |
| Does the article investigate a health services research topic as defined by the SAMW and presented in the title or abstract?                    |                                     |    |
| Does the article assess an intervention to reduce a condition as presented in the title or abstract?                                            |                                     |    |

**To be included, all questions in the above table have to be answered with Yes.**

| Exclusion criteria:                                                                                                                                                                                                                                                                                  | Criteria fulfilled? |    |
|------------------------------------------------------------------------------------------------------------------------------------------------------------------------------------------------------------------------------------------------------------------------------------------------------|---------------------|----|
|                                                                                                                                                                                                                                                                                                      | Yes                 | No |
| Does the article investigate efficacy or describes clinical trials phases I to III, epidemiological studies to assess determinants or risk factors, non-human studies or the establishment of databases or registries as described in the title or the objective or methods section of the abstract? |                     |    |
| Does the article exclusively describe an economic assessment or cost analysis in the title or abstract?                                                                                                                                                                                              |                     |    |
| Does the article describe an overview or review of reviews within the title or abstract?                                                                                                                                                                                                             |                     |    |
| Does the article describe a protocol of a systematic review?                                                                                                                                                                                                                                         |                     |    |

|                                                           |  |  |
|-----------------------------------------------------------|--|--|
| Is the design or the intervention of the article unclear? |  |  |
|-----------------------------------------------------------|--|--|

To be included, all questions in the above table have to be answered with No.

## B) For rapid reviews

| Inclusion criteria:                                                                                                                                                         | Criteria fulfilled?<br>Please tick. |    |
|-----------------------------------------------------------------------------------------------------------------------------------------------------------------------------|-------------------------------------|----|
|                                                                                                                                                                             | Yes                                 | No |
| Is the article titled as rapid review, rapid method or rapid synthesis or designed as such in the method section of the abstract or registered as such within the database? |                                     |    |
| Is the article published (at least online) between January, 2010 and August, 2015?                                                                                          |                                     |    |
| Does the article investigate a health services research topic as defined by the SAMW and presented in the title or abstract?                                                |                                     |    |
| Does the article assess an intervention to reduce a condition as presented in the title or abstract?                                                                        |                                     |    |

To be included, all questions in the above table have to be answered with Yes.

The exclusion criteria are the same as described in A).

## C) For Cochrane systematic reviews

| Inclusion criteria:                                                                                                          | Criteria fulfilled?<br>Please tick. |    |
|------------------------------------------------------------------------------------------------------------------------------|-------------------------------------|----|
|                                                                                                                              | Yes                                 | No |
| Is the article registered and published as Cochrane systematic review within the Cochrane database?                          |                                     |    |
| Is the article published (at least online) between January, 2010 and August, 2015?                                           |                                     |    |
| Does the article investigate a health services research topic as defined by the SAMW and presented in the title or abstract? |                                     |    |
| Does the article assess an intervention to reduce a condition as presented in the title or abstract?                         |                                     |    |

To be included, all questions in the above table have to be answered with Yes.

The exclusion criteria are the same as described in A).

## Appendix 3: Data extraction for full text assessment

### Variables to be assessed (excel file):

- Study type (Cochrane SR, SR, RR, CD RR), Study ID, Report ID
- First study author, contact details of corresponding author, country, mail contact
- Reference citation
- Year of study (publication), version (update or first review)
- Initials of data extractor, initials of people who cross-checked extraction
- Study protocol mentioned, PRISMA checklist used
- Specific review topic, thematic focus, type of intervention, setting
- Study population: size, type, age range of participants included, sex
- Funding source, Conflict of interest statement
- Stakeholder involvement (SI): SI mentioned, SI as key word, number of stakeholders involved, types, stages involved, reasons for SI mentioned, effects of SI mentioned,
- Amstar rating, comparison of rating (Health evidence/health system evidence)

### AMSTAR – a measurement tool to assess the methodological quality of systematic reviews.

#### 1. Was an 'a priori' design provided?

The research question and inclusion criteria should be established before the conduct of the review.

*Note: Need to refer to a protocol, ethics approval, or pre-determined/a priori published research objectives to score a "yes."*

- Yes
- No
- Can't answer
- Not applicable

#### 2. Was there duplicate study selection and data extraction?

There should be at least two independent data extractors and a consensus procedure for disagreements should be in place.

*Note: 2 people do study selection, 2 people do data extraction, consensus process or one person checks the other's work.*

- Yes
- No
- Can't answer
- Not applicable

#### 3. Was a comprehensive literature search performed?

At least two electronic sources should be searched. The report must include years and databases used (e.g., Central, EMBASE, and MEDLINE). Key words and/or MESH terms must be stated and where feasible the search strategy should be provided. All searches should be supplemented by consulting current contents, reviews, textbooks, specialized registers, or experts in the particular field of study, and by reviewing the references in the studies found.

*Note: If at least 2 sources + one supplementary strategy used, select "yes" (Cochrane register/Central counts as 2 sources; a grey literature search counts as supplementary).*

- Yes
- No
- Can't answer
- Not applicable

#### 4. Was the status of publication (i.e. grey literature) used as an inclusion criterion?

The authors should state that they searched for reports regardless of their publication type. The authors should state whether or not they excluded any reports (from the systematic review), based on their publication status, language etc.

*Note: If review indicates that there was a search for "grey literature" or "unpublished literature," indicate "yes." SIGLE database, dissertations, conference proceedings, and*

trial registries are all considered grey for this purpose. If searching a source that contains both grey and non-grey, must specify that they were searching for grey/unpublished lit.

- Yes
- No
- Can't answer
- Not applicable

**5. Was a list of studies (included and excluded) provided?**

A list of included and excluded studies should be provided.

*Note: Acceptable if the excluded studies are referenced. If there is an electronic link to the list but the link is dead, select "no."*

- Yes
- No
- Can't answer
- Not applicable

**6. Were the characteristics of the included studies provided?**

In an aggregated form such as a table, data from the original studies should be provided on the participants, interventions and outcomes. The ranges of characteristics in all the studies analyzed e.g., age, race, sex, relevant socioeconomic data, disease status, duration, severity, or other diseases should be reported.

*Note: Acceptable if not in table format as long as they are described as above.*

- Yes
- No
- Can't answer
- Not applicable

**7. Was the scientific quality of the included studies assessed and documented?**

'A priori' methods of assessment should be provided (e.g., for effectiveness studies if the author(s) chose to include only randomized, double-blind, placebo controlled studies, or allocation concealment as inclusion criteria); for other types of studies alternative items will be relevant.

*Note: Can include use of a quality scoring tool or checklist, e.g., Jadad scale, risk of bias, sensitivity analysis, etc., or a description of quality items, with some kind of result for EACH study ("low" or "high" is fine, as long as it is clear which studies scored "low" and which scored "high"; a summary score/range for all studies is not acceptable).*

- Yes
- No
- Can't answer
- Not applicable

**8. Was the scientific quality of the included studies used appropriately in formulating conclusions?**

The results of the methodological rigor and scientific quality should be considered in the analysis and the conclusions of the review, and explicitly stated in formulating recommendations.

*Note: Might say something such as "the results should be interpreted with caution due to poor quality of included studies." Cannot score "yes" for this question if scored "no" for question 7.*

- Yes
- No
- Can't answer
- Not applicable

**9. Were the methods used to combine the findings of studies appropriate?**

For the pooled results, a test should be done to ensure the studies were combinable, to assess their homogeneity (i.e., Chi-squared test for homogeneity,  $I^2$ ). If heterogeneity exists a random effects model should be used and/or the clinical appropriateness of combining should be taken into consideration (i.e., is it sensible to combine?).

*Note: Indicate "yes" if they mention or describe heterogeneity, i.e., if they explain that they cannot pool because of heterogeneity/variability between interventions.*

- Yes
- No
- Can't answer
- Not applicable

**10. Was the likelihood of publication bias assessed?**

An assessment of publication bias should include a combination of graphical aids (e.g., funnel plot, other available tests) and/or statistical tests (e.g., Egger regression test, Hedges-Olken).

*Note: If no test values or funnel plot included, score "no". Score "yes" if mentions that*

1  
2  
3 *publication bias could not be assessed because there were fewer than 10 included*  
4 *studies.*

- 5  Yes  
6  No  
7  Can't answer  
8  Not applicable

9 **11. Was the conflict of interest included?**

10 Potential sources of support should be clearly acknowledged in both the systematic  
11 review and the included studies.

12 *Note: To get a "yes," must indicate source of funding or support for the systematic*  
13 *review AND for each of the included studies.*

- 14  Yes  
15  No  
16  Can't answer  
17  Not applicable

18 *Shea et al. BMC Medical Research Methodology 2007 7:10 doi:10.1186/1471-2288-7-10*  
19 *Additional notes (in italics) made by Michelle Weir, Julia Worswick, and Carolyn Wayne based on*  
20 *conversations with*

21 *Bev Shea and/or Jeremy Grimshaw in June and October 2008 and July and September 2010.*  
22  
23  
24  
25  
26  
27  
28  
29  
30  
31  
32  
33  
34  
35  
36  
37  
38  
39  
40  
41  
42  
43  
44  
45  
46  
47  
48  
49  
50  
51  
52  
53  
54  
55  
56  
57  
58  
59  
60

STROBE Statement—Checklist of items that should be included in reports of *cross-sectional studies*

|                           | Item No | Recommendation                                                                                                                                                                                    | Page no.                           |
|---------------------------|---------|---------------------------------------------------------------------------------------------------------------------------------------------------------------------------------------------------|------------------------------------|
| <b>Title and abstract</b> | 1       | (a) Indicate the study's design with a commonly used term in the title or the abstract                                                                                                            | 1                                  |
|                           |         | (b) Provide in the abstract an informative and balanced summary of what was done and what was found                                                                                               | 2                                  |
| <b>Introduction</b>       |         |                                                                                                                                                                                                   |                                    |
| Background/rationale      | 2       | Explain the scientific background and rationale for the investigation being reported                                                                                                              | 3-5                                |
| Objectives                | 3       | State specific objectives, including any prespecified hypotheses                                                                                                                                  | 5-6                                |
| <b>Methods</b>            |         |                                                                                                                                                                                                   |                                    |
| Study design              | 4       | Present key elements of study design early in the paper                                                                                                                                           | 6                                  |
| Setting                   | 5       | Describe the setting, locations, and relevant dates, including periods of recruitment, exposure, follow-up, and data collection                                                                   | Inclusion & exclusion criteria: 7  |
| Participants              | 6       | (a) Give the eligibility criteria, and the sources and methods of selection of participants                                                                                                       | Search strategy and screening: 6-7 |
| Variables                 | 7       | Clearly define all outcomes, exposures, predictors, potential confounders, and effect modifiers. Give diagnostic criteria, if applicable                                                          | Data extraction: 8                 |
| Data sources/measurement  | 8*      | For each variable of interest, give sources of data and details of methods of assessment (measurement). Describe comparability of assessment methods if there is more than one group              | Data extraction: 8                 |
| Bias                      | 9       | Describe any efforts to address potential sources of bias                                                                                                                                         | Reporting quality: AMSTAR: 8       |
| Study size                | 10      | Explain how the study size was arrived at                                                                                                                                                         | 7                                  |
| Quantitative variables    | 11      | Explain how quantitative variables were handled in the analyses. If applicable, describe which groupings were chosen and why                                                                      | n.a.                               |
| Statistical methods       | 12      | (a) Describe all statistical methods, including those used to control for confounding                                                                                                             | n.a.                               |
|                           |         | (b) Describe any methods used to examine subgroups and interactions                                                                                                                               | n.a.                               |
|                           |         | (c) Explain how missing data were addressed                                                                                                                                                       | n.a.                               |
|                           |         | (d) If applicable, describe analytical methods taking account of sampling strategy                                                                                                                | n.a.                               |
|                           |         | (e) Describe any sensitivity analyses                                                                                                                                                             | n.a.                               |
| <b>Results</b>            |         |                                                                                                                                                                                                   |                                    |
| Participants              | 13*     | (a) Report numbers of individuals at each stage of study—eg numbers potentially eligible, examined for eligibility, confirmed eligible, included in the study, completing follow-up, and analysed | 9                                  |



|                          |     |                                                                                                                                                                                                              |               |
|--------------------------|-----|--------------------------------------------------------------------------------------------------------------------------------------------------------------------------------------------------------------|---------------|
|                          |     | (b) Give reasons for non-participation at each stage                                                                                                                                                         |               |
|                          |     | (c) Consider use of a flow diagram                                                                                                                                                                           | Figure 1      |
| Descriptive data         | 14* | (a) Give characteristics of study participants (eg demographic, clinical, social) and information on exposures and potential confounders                                                                     | 9-12, Table 1 |
|                          |     | (b) Indicate number of participants with missing data for each variable of interest                                                                                                                          | Table 1       |
| Outcome data             | 15* | Report numbers of outcome events or summary measures                                                                                                                                                         | Tables 3 + 4  |
| Main results             | 16  | (a) Give unadjusted estimates and, if applicable, confounder-adjusted estimates and their precision (eg, 95% confidence interval). Make clear which confounders were adjusted for and why they were included | Tables 1-4    |
|                          |     | (b) Report category boundaries when continuous variables were categorized                                                                                                                                    | Tables        |
|                          |     | (c) If relevant, consider translating estimates of relative risk into absolute risk for a meaningful time period                                                                                             | n.a.          |
| Other analyses           | 17  | Report other analyses done—eg analyses of subgroups and interactions, and sensitivity analyses                                                                                                               | n.a.          |
| <b>Discussion</b>        |     |                                                                                                                                                                                                              |               |
| Key results              | 18  | Summarise key results with reference to study objectives                                                                                                                                                     | 18-19         |
| Limitations              | 19  | Discuss limitations of the study, taking into account sources of potential bias or imprecision. Discuss both direction and magnitude of any potential bias                                                   | 20-21         |
| Interpretation           | 20  | Give a cautious overall interpretation of results considering objectives, limitations, multiplicity of analyses, results from similar studies, and other relevant evidence                                   | 19-20         |
| Generalisability         | 21  | Discuss the generalisability (external validity) of the study results                                                                                                                                        | 21-22         |
| <b>Other information</b> |     |                                                                                                                                                                                                              |               |
| Funding                  | 22  | Give the source of funding and the role of the funders for the present study and, if applicable, for the original study on which the present article is based                                                | 22            |

n.a. not applicable

## Supplementary Table S1

## References of excluded studies

| Review type | Number after randomization | Reference                                                                                                                                                                                                                                       |
|-------------|----------------------------|-------------------------------------------------------------------------------------------------------------------------------------------------------------------------------------------------------------------------------------------------|
| CSR         | 1                          | 2013 C. Verra Wiebe, G. H. van den Boom Lennard, W. Jacobs, J. Clement Darren, A. B. Wymenga Ate and G. H. H. Nelissen Rob Retention versus sacrifice of the posterior cruciate ligament in total knee arthroplasty for treating osteoarthritis |
| CSR         | 2                          | 2014 A. Anie Kofi and P. Massaglia Psychological therapies for thalassaemia                                                                                                                                                                     |
| CSR         | 3                          | 2012 P. Wilkinson and Z. Izmeth Continuation and maintenance treatments for depression in older people                                                                                                                                          |
| CSR         | 4                          | 2011 C. van Dalen Elvira, W. van As Jorrit and B. de Camargo Methotrexate for high-grade osteosarcoma in children and young adults                                                                                                              |
| CSR         | 5                          | 2013 I. Omar Muhammad and E. Alexander Cameron Drug treatment for faecal incontinence in adults                                                                                                                                                 |
| CSR         | 6                          | 2012 J. Preston Nancy, A. Hurlow, J. Brine and I. Bennett Michael Blood transfusions for anaemia in patients with advanced cancer                                                                                                               |
| CSR         | 7                          | 2012 N. Skoetz, K. Bauer, T. Elter, I. Monsef, V. Roloff, M. Hallek and A. Engert Alemtuzumab for patients with chronic lymphocytic leukaemia                                                                                                   |
| CSR         | 8                          | 2014 R. Li Luying, E. Sydenham, B. Chaudhary, D. Beecher and C. You Glucocorticoid with cyclophosphamide for paraquat-induced lung fibrosis                                                                                                     |
| CSR         | 9                          | 2013 A. Ohlsson and B. Lacy Janet Intravenous immunoglobulin for preventing infection in preterm and/or low birth weight infants                                                                                                                |
| CSR         | 10                         | 2015 S. Gurusamy Kurinchi, V. Giljaca, Y. Takwoingi, D. Higgle, G. Poropat, D. A timac and R. Davidson Brian Endoscopic retrograde cholangiopancreatography versus intraoperative cholangiography for diagnosis of common bile duct stones      |
| CSR         | 11                         | 2012 Y. Zhang, C. Fang, R. Dong Bi, T. Wu and L. Deng Jue Oxygen therapy for pneumonia in adults                                                                                                                                                |
| CSR         | 12                         | 2013 J. Qureshi Mosarrat and M. Kumar D-Penicillamine for preventing retinopathy of prematurity in preterm infants                                                                                                                              |
| CSR         | 13                         | 2015 M. Di Nisio, F. Peinemann, E. Porreca and W. S. Rutjes Anne Primary prophylaxis for venous thromboembolism in patients undergoing cardiac or thoracic surgery                                                                              |
| CSR         | 14                         | 2014 B. Tan Hannah, S. Danilla, A. Murray, R. Serra, R. El Dib, O. W. Henderson Tom and J. Wasiak Immunonutrition as an adjuvant therapy for burns                                                                                              |
| CSR         | 15                         | 2012 A. Hurlow, I. Bennett Michael, A. Robb Karen, I. Johnson Mark, H. Simpson Karen and G. Oxberry Stephen Transcutaneous electric nerve stimulation (TENS) for cancer pain in adults                                                          |
| CSR         | 16                         | 2013 Z. Dong, J. Xu, Z. Wang and S. Petrov Maxim Stents for the prevention of pancreatic fistula following pancreaticoduodenectomy                                                                                                              |
| CSR         | 17                         | 2012 G. Feagan Brian and K. MacDonald John Oral 5-aminosalicylic acid for induction of remission in ulcerative colitis                                                                                                                          |
| CSR         | 18                         | 2012 M. Dhiwakar, W. A. Clement, M. Supriya and W. McKerrow Antibiotics to reduce post-tonsillectomy morbidity                                                                                                                                  |
| CSR         | 19                         | 2015 L. Gal Robin, S. Vedula Satyanarayana and R. Beck Corticosteroids for treating optic neuritis                                                                                                                                              |
| CSR         | 20                         | 2012 A. Andras, A. Sala Tenna and F. Crawford Vitamin K antagonists or low-molecular-weight heparin for the long term treatment of symptomatic venous thromboembolism                                                                           |

|    |            |    |                                                                                                                                                                                                                                                              |
|----|------------|----|--------------------------------------------------------------------------------------------------------------------------------------------------------------------------------------------------------------------------------------------------------------|
| 1  |            |    |                                                                                                                                                                                                                                                              |
| 2  |            |    |                                                                                                                                                                                                                                                              |
| 3  | <b>CSR</b> | 21 | 2013 S. Rajaram Sujanthy, K. Desai Nayan, A. Kalra, M. Gajera, K. Cavanaugh Susan, W. Brampton, D. Young, S. Harvey and K. Rowan Pulmonary artery catheters for adult patients in intensive care                                                             |
| 4  |            |    |                                                                                                                                                                                                                                                              |
| 5  | <b>CSR</b> | 22 | 2011 L. Nelson Richard, P. Kelsey, H. Leeman, N. Meardon, H. Patel, K. Paul, R. Rees, B. Taylor, E. Wood and R. Malakun Antibiotic treatment for Clostridium difficile-associated diarrhea in adults                                                         |
| 6  | <b>CSR</b> | 23 | 2012 R. Gurion, Y. Belnik-Plitman, A. Gafer-Gvili, M. Paul, L. Vidal, I. Ben-Bassat, O. Shpilberg and P. Raanani Colony-stimulating factors for prevention and treatment of infectious complications in patients with acute myelogenous leukemia             |
| 7  |            |    |                                                                                                                                                                                                                                                              |
| 8  | <b>CSR</b> | 24 | 2014 A. Akl Elie, P. Ramly Elie, A. Kahale Lara, E. D. Yosucio Victor, M. Barba, F. Sperati, D. Cook and H. Schünemann Anticoagulation for people with cancer and central venous catheters                                                                   |
| 9  | <b>CSR</b> | 25 | 2015 K. Maduwage, A. Buckley Nick, H. J. de Silva, G. Laloo David and K. Isbister Geoffrey Snake antivenom for snake venom induced consumption coagulopathy                                                                                                  |
| 10 | <b>CSR</b> | 26 | 2012 Y. Xiao, M. Luo, J. Wang and H. Luo Losigamone add-on therapy for partial epilepsy                                                                                                                                                                      |
| 11 |            |    |                                                                                                                                                                                                                                                              |
| 12 | <b>CSR</b> | 27 | 2014 H. Lamers Mieke, M. Broekman, P. H. Drenth Joost and C. Gluud Aminoadamantanes versus other antiviral drugs for chronic hepatitis C                                                                                                                     |
| 13 | <b>CSR</b> | 28 | 2015 G. Elbers Roy, J. Verhoef, E. H. van Wegen Erwin, W. Berendse Henk and G. Kwakkel Interventions for fatigue in Parkinson's disease                                                                                                                      |
| 14 | <b>CSR</b> | 29 | 2013 R. Lodha, K. Kabra Sushil and M. Pandey Ravindra Antibiotics for community-acquired pneumonia in children                                                                                                                                               |
| 15 | <b>CSR</b> | 30 | 2012 J. Thornton and S. Rangaraj Disease modifying anti-rheumatic drugs in people with cystic fibrosis-related arthritis                                                                                                                                     |
| 16 | <b>CSR</b> | 31 | 2013 V. Wong, K. L. Cheuk Daniel, S. Lee and V. Chu Acupuncture for acute management and rehabilitation of traumatic brain injury                                                                                                                            |
| 17 | <b>CSR</b> | 32 | 2014 H. Li, J. Wang, C. Li and Z. Xiao Repetitive transcranial magnetic stimulation (rTMS) for panic disorder in adults                                                                                                                                      |
| 18 | <b>CSR</b> | 33 | 2013 T. Allersma, C. Farquhar and E. P. Cantineau Astrid Natural cycle in vitro fertilisation (IVF) for subfertile couples                                                                                                                                   |
| 19 | <b>CSR</b> | 34 | 2011 N. Johnson, A. Bryant, T. Miles, T. Hogberg and P. Cornes Adjuvant chemotherapy for endometrial cancer after hysterectomy                                                                                                                               |
| 20 | <b>CSR</b> | 35 | 2012 L. Choo Karen Jui, F. E. R. Simons and A. Sheikh Glucocorticoids for the treatment of anaphylaxis                                                                                                                                                       |
| 21 | <b>CSR</b> | 36 | 2014 A. Ohlsson, S. Shah Vibhuti and C. Stade Brenda Vaginal chlorhexidine during labour to prevent early-onset neonatal group B streptococcal infection                                                                                                     |
| 22 | <b>CSR</b> | 37 | 2013 Y. Cheng, J. Lu, X. Xiong, S. Wu, Y. Lin, T. Wu and N. Cheng Gases for establishing pneumoperitoneum during laparoscopic abdominal surgery                                                                                                              |
| 23 | <b>CSR</b> | 38 | 2014 J. Zheng, Y. Fang, W. Cai Bo, H. Zhang, W. Liu, B. Wu, G. Xu Jian and C. You Intracystic bleomycin for cystic craniopharyngiomas in children                                                                                                            |
| 24 | <b>CSR</b> | 39 | 2012 T. Tonia, A. Mettler, N. Robert, G. Schwarzer, J. Seidenfeld, O. Weingart, C. Hyde, A. Engert and J. Bohlius Erythropoietin or darbepoetin for patients with cancer                                                                                     |
| 25 | <b>CSR</b> | 40 | 2015 L. Bricker, N. Medley and J. Pratt Jeremy Routine ultrasound in late pregnancy (after 24 weeks' gestation)                                                                                                                                              |
| 26 | <b>CSR</b> | 41 | 2015 X. Lin, J. Lu, M. Yang, R. Dong Bi and M. Wu Hong Macrolides for diffuse panbronchiolitis                                                                                                                                                               |
| 27 | <b>CSR</b> | 42 | 2014 S. Gurusamy Kurinchi, M. Nagendran, F. Broadhurst Jack, D. Anker Stefan and T. Richards Iron therapy in anaemic adults without chronic kidney disease                                                                                                   |
| 28 | <b>CSR</b> | 43 | 2015 R. El Dib, L. F. Gameiro Orsi, S. P. Ogata Matheus, S. P. Módolo Norma, G. Braz Leandro, C. Jorge Eliane, P. do Nascimento Junior and V. Beletate Zinc supplementation for the prevention of type 2 diabetes mellitus in adults with insulin resistance |
| 29 | <b>CSR</b> | 44 | 2014 L. La Mantia, C. Di Pietrantonj, M. Rovaris, G. Rigon, S. Frau, F. Berardo, A. Gandini, A. Longobardi, B. Weinstock-Guttman and A. Vaona Interferons-beta versus glatiramer acetate for relapsing-remitting multiple sclerosis                          |
| 30 | <b>CSR</b> | 45 | 2015 S. Zhao, S. Sampson, J. Xia and B. Jayaram Mahesh Psychoeducation (brief) for people with serious mental illness                                                                                                                                        |
| 31 | <b>CSR</b> | 46 | 2015 L. Gluud Lise, G. Dam, I. Les, J. Córdoba, G. Marchesini, M. Borre, K. Aagaard Niels and H. Vilstrup Branched-chain amino acids for people with hepatic encephalopathy                                                                                  |
| 32 | <b>CSR</b> | 47 | 2013 M. Mason, J. Welsh Emma and I. Smith Drug therapy for obstructive sleep apnoea in adults                                                                                                                                                                |
| 33 |            |    |                                                                                                                                                                                                                                                              |
| 34 |            |    |                                                                                                                                                                                                                                                              |
| 35 |            |    |                                                                                                                                                                                                                                                              |
| 36 |            |    |                                                                                                                                                                                                                                                              |
| 37 |            |    |                                                                                                                                                                                                                                                              |
| 38 |            |    |                                                                                                                                                                                                                                                              |
| 39 |            |    |                                                                                                                                                                                                                                                              |
| 40 |            |    |                                                                                                                                                                                                                                                              |
| 41 |            |    |                                                                                                                                                                                                                                                              |
| 42 |            |    |                                                                                                                                                                                                                                                              |
| 43 |            |    |                                                                                                                                                                                                                                                              |
| 44 |            |    |                                                                                                                                                                                                                                                              |
| 45 |            |    |                                                                                                                                                                                                                                                              |
| 46 |            |    |                                                                                                                                                                                                                                                              |

|    |            |    |                                                                                                                                                                                                                              |
|----|------------|----|------------------------------------------------------------------------------------------------------------------------------------------------------------------------------------------------------------------------------|
| 1  |            |    |                                                                                                                                                                                                                              |
| 2  |            |    |                                                                                                                                                                                                                              |
| 3  | <b>CSR</b> | 48 | 2015 Y. Tanaka, T. Nakayama, M. Nishimori, Y. Tsujimura, M. Kawaguchi and Y. Sato Lidocaine for preventing postoperative sore throat                                                                                         |
| 4  | <b>CSR</b> | 49 | 2013 N. Petrucci and C. De Feo Lung protective ventilation strategy for the acute respiratory distress syndrome                                                                                                              |
| 5  | <b>CSR</b> | 50 | 2012 J. Mehrholz, J. Kugler and M. Pohl Locomotor training for walking after spinal cord injury                                                                                                                              |
| 6  | <b>CSR</b> | 51 | 2013 C. Xander, J. Meerpohl Joerg, D. Galandi, S. Buroh, G. Schwarzer, G. Antes and G. Becker Pharmacological interventions for pruritus in adult palliative care patients                                                   |
| 7  | <b>CSR</b> | 52 | 2011 M. Pammi and A. Abrams Steven Oral lactoferrin for the treatment of sepsis and necrotizing enterocolitis in neonates                                                                                                    |
| 8  | <b>CSR</b> | 53 | 2012 N. Eliakim-Raz, E. Robenshtok, D. Shefet, A. Gafer-Gvili, L. Vidal, M. Paul and L. Leibovici Empiric antibiotic coverage of atypical pathogens for community-acquired pneumonia in hospitalized adults                  |
| 9  | <b>CSR</b> | 54 | 2015 C. T. Hsu Charlie, N. C. Kwan Gigi, A. Thompson Shane, H. Evans-Barns and L. van Driel Mieke Embolisation for pulmonary arteriovenous malformation                                                                      |
| 10 | <b>CSR</b> | 55 | 2012 R. Evans Jennifer and G. Lawrenson John Antioxidant vitamin and mineral supplements for slowing the progression of age-related macular degeneration                                                                     |
| 11 | <b>CSR</b> | 56 | 2013 R. Stanton Tasha, M. Wand Benedict, B. Carr Daniel, F. Birklein, L. Wasner Gunnar and E. O'Connell Neil Local anaesthetic sympathetic blockade for complex regional pain syndrome                                       |
| 12 | <b>CSR</b> | 57 | 2011 A. Afshari, A. Wikkelsø, J. Brok, M. Møller Ann and J. Wetterslev Thrombelastography (TEG) or thromboelastometry (ROTEM) to monitor haemotherapy versus usual care in patients with massive transfusion                 |
| 13 | <b>CSR</b> | 58 | 2012 Q. Zhou, J. Zheng, L. Yu and X. Jia Pregabalin monotherapy for epilepsy                                                                                                                                                 |
| 14 | <b>CSR</b> | 59 | 2014 S. Kumbargere Nagraj, S. Naresh, K. Srinivas, P. Renjith George, A. Shrestha, D. Levenson and M. Ferraiolo Debra Interventions for the management of taste disturbances                                                 |
| 15 | <b>CSR</b> | 60 | 2013 M. Fernandes Ricardo, M. Bialy Liza, B. Vandermeer, L. Tjosvold, C. Plint Amy, H. Patel, W. Johnson David, P. Klassen Terry and L. Hartling Glucocorticoids for acute viral bronchiolitis in infants and young children |
| 16 | <b>CSR</b> | 61 | 2012 J. Meerpohl Joerg, G. Antes, G. Rücker, N. Fleeman, E. Motschall, M. Niemyer Charlotte and D. Bassler Deferasirox for managing iron overload in people with thalassaemia                                                |
| 17 | <b>CSR</b> | 62 | 2015 N. G. Andriolo Brenda, B. Andriolo Régis, H. Saconato, N. Atallah Álvaro and O. Valente Early versus late tracheostomy for critically ill patients                                                                      |
| 18 | <b>CSR</b> | 63 | 2013 R. Magni Laura, M. Purgato, C. Gastaldon, D. Papola, A. Furukawa Toshi, A. Cipriani and C. Barbui Fluoxetine versus other types of pharmacotherapy for depression                                                       |
| 19 | <b>CSR</b> | 64 | 2012 S. Ricci, L. Dinia, M. Del Sette, P. Anzola, T. Mazzoli, S. Cenciarelli and C. Gandolfo Sonothrombolysis for acute ischaemic stroke                                                                                     |
| 20 | <b>CSR</b> | 65 | 2015 A. Fisher Sheila, H. Zhang, C. Doree, A. Mathur and E. Martin-Rendon Stem cell treatment for acute myocardial infarction                                                                                                |
| 21 | <b>CSR</b> | 66 | 2013 T. Daniels, N. Mills and P. Whitaker Nebuliser systems for drug delivery in cystic fibrosis                                                                                                                             |
| 22 | <b>CSR</b> | 67 | 2015 M.-T. Sickinger, B. von Tresckow, C. Kobe, A. Engert, P. Borchmann and N. Skoetz Positron emission tomography-adapted therapy for first-line treatment in individuals with Hodgkin lymphoma                             |
| 23 | <b>CSR</b> | 68 | 2014 C. Kavirajan Harish, K. Lueck and K. Chuang Alternating current cranial electrotherapy stimulation (CES) for depression                                                                                                 |
| 24 | <b>CSR</b> | 69 | 2012 K. Gupta Aditya, M. Paquet, E. Villanueva and W. Brintnell Interventions for actinic keratoses                                                                                                                          |
| 25 | <b>CSR</b> | 70 | 2014 M. Khasraw, S. Ameratunga Malaka, R. Grant, H. Wheeler and N. Pavlakis Antiangiogenic therapy for high-grade glioma                                                                                                     |
| 26 | <b>CSR</b> | 71 | 2012 C. Leucht, M. Huhn and S. Leucht Amitriptyline versus placebo for major depressive disorder                                                                                                                             |
| 27 | <b>CSR</b> | 72 | 2012 L. Malanda Uriëll, M. C. Welschen Laura, I. Riphagen Ingrid, M. Dekker Jacqueline, G. Nijpels and D. M. Bot Sandra Self-monitoring of blood glucose in patients with type 2 diabetes mellitus who are not using insulin |
| 28 | <b>CSR</b> | 73 | 2014 B. Povlsen, T. Hansson and D. Povlsen Sebastian Treatment for thoracic outlet syndrome                                                                                                                                  |
| 29 |            |    |                                                                                                                                                                                                                              |
| 30 |            |    |                                                                                                                                                                                                                              |
| 31 |            |    |                                                                                                                                                                                                                              |
| 32 |            |    |                                                                                                                                                                                                                              |
| 33 |            |    |                                                                                                                                                                                                                              |
| 34 |            |    |                                                                                                                                                                                                                              |
| 35 |            |    |                                                                                                                                                                                                                              |
| 36 |            |    |                                                                                                                                                                                                                              |
| 37 |            |    |                                                                                                                                                                                                                              |
| 38 |            |    |                                                                                                                                                                                                                              |
| 39 |            |    |                                                                                                                                                                                                                              |
| 40 |            |    |                                                                                                                                                                                                                              |
| 41 |            |    |                                                                                                                                                                                                                              |
| 42 |            |    |                                                                                                                                                                                                                              |
| 43 |            |    |                                                                                                                                                                                                                              |
| 44 |            |    |                                                                                                                                                                                                                              |
| 45 |            |    |                                                                                                                                                                                                                              |
| 46 |            |    |                                                                                                                                                                                                                              |

|    |            |    |                                                                                                                                                                     |
|----|------------|----|---------------------------------------------------------------------------------------------------------------------------------------------------------------------|
| 1  |            |    |                                                                                                                                                                     |
| 2  |            |    |                                                                                                                                                                     |
| 3  |            |    | 2015 N. Hofstede Stefanie, A. Nouta Klaas, W. Jacobs, L. van Hooff Miranda, B. Wymenga Ate, G. Pijls Bart, G. H. H. Nelissen Rob and J. Marang-van de Mheen         |
| 4  | <b>CSR</b> | 74 | Perla Mobile bearing vs fixed bearing prostheses for posterior cruciate retaining total knee arthroplasty for postoperative functional status in patients with      |
| 5  |            |    | osteoarthritis and rheumatoid arthritis                                                                                                                             |
| 6  | <b>CSR</b> | 75 | 2013 J. Visser, M. Snel and A. A. M. Van Vliet Huib Hormonal versus non-hormonal contraceptives in women with diabetes mellitus type 1 and 2                        |
| 7  | <b>CSR</b> | 76 | 2014 M. Kleinstäuber, M. Witthöft, A. Steffanowski, H. van Marwijk, W. Hiller and J. Lambert Michael Pharmacological interventions for somatoform disorders in      |
| 8  |            |    | adults                                                                                                                                                              |
| 9  | <b>CSR</b> | 77 | 2013 S. Anderson-James, M. Marchant Julie, P. Acworth Jason, C. Turner and B. Chang Anne Inhaled corticosteroids for subacute cough in children                     |
| 10 | <b>CSR</b> | 78 | 2015 R. Tramm, D. Ilic, R. Davies Andrew, A. Pellegrino Vincent, L. Romero and C. Hodgson Extracorporeal membrane oxygenation for critically ill adults             |
| 11 | <b>CSR</b> | 79 | 2013 B. Scholefield, H. Duncan, P. Davies, F. Gao Smith, K. Khan, D. Perkins Gavin and K. Morris Hypothermia for neuroprotection in children after                  |
| 12 |            |    | cardiopulmonary arrest                                                                                                                                              |
| 13 | <b>CSR</b> | 80 | 2013 K. R. Prabhu Rama, N. Swaminathan and A. Harvey Lisa Passive movements for the treatment and prevention of contractures                                        |
| 14 | <b>CSR</b> | 81 | 2015 M. Kew Kayleigh, K. Undela, I. Kotortsi and G. Ferrara Macrolides for chronic asthma                                                                           |
| 15 | <b>CSR</b> | 82 | 2014 D. Segal, K. MacDonald John and N. Chande Low dose naltrexone for induction of remission in Crohn's disease                                                    |
| 16 |            |    |                                                                                                                                                                     |
| 17 | <b>CSR</b> | 83 | 2012 P. Boonmak, S. Boonmak and P. Pattanittum High initial concentration versus low initial concentration sevoflurane for inhalational induction of anaesthesia    |
| 18 | <b>CSR</b> | 84 | 2015 H. Hunt, S. Stanworth, N. Curry, T. Woolley, C. Cooper, O. Koumounne, Z. Zhelev and C. Hyde Thromboelastography (TEG) and rotational                           |
| 19 |            |    | thromboelastometry (ROTEM) for trauma-induced coagulopathy in adult trauma patients with bleeding                                                                   |
| 20 | <b>CSR</b> | 85 | 2015 J. Ells Louisa, E. Mead, G. Atkinson, E. Corpeleijn, K. Roberts, R. Viner, L. Baur, M.-I. Metzendorf and B. Richter Surgery for the treatment of obesity in    |
| 21 |            |    | children and adolescents                                                                                                                                            |
| 22 | <b>CSR</b> | 86 | 2015 A. Ali, I. Hall, J. Blickwedel and A. Hassiotis Behavioural and cognitive-behavioural interventions for outwardly-directed aggressive behaviour in people with |
| 23 | <b>CSR</b> | 87 | intellectual disabilities                                                                                                                                           |
| 24 | <b>CSR</b> | 88 | 2011 N. Kiwanuka Suzanne, E. Rutebemberwa, C. Nalwadda, O. Okui, F. Ssengooba, A. Kinengyere Alison and W. Pariyo George Interventions to manage dual               |
| 25 |            |    | practice among health workers                                                                                                                                       |
| 26 | <b>CSR</b> | 89 | 2011 A. Vasudev, K. Macritchie, N. K. Rao Sanjay, J. Geddes and H. Young Allan Tiagabine in the maintenance treatment of bipolar disorder                           |
| 27 | <b>CSR</b> | 90 | 2014 C. Daly, D. Cody June, I. Khan, S. Rabindranath Kannaiyan, L. Vale and A. Wallace Sheila Double bag or Y-set versus standard transfer systems for              |
| 28 |            |    | continuous ambulatory peritoneal dialysis in end-stage kidney disease                                                                                               |
| 29 | <b>CSR</b> | 91 | 2013 J. Saldanha Ian, O. Akinyede and A. Robinson Karen Immunosuppressive drug therapy for preventing rejection following lung transplantation in cystic fibrosis   |
| 30 | <b>CSR</b> | 92 | 2013 J. Bradt, C. Dileo and M. Shim Music interventions for preoperative anxiety                                                                                    |
| 31 | <b>CSR</b> | 93 | 2012 W. Jacobs, A. Van der Gaag Niels, A. Tuschel, M. de Kleuver, W. Peul, A. J. Verbout and F. C. Oner Total disc replacement for chronic back pain in the         |
| 32 |            |    | presence of disc degeneration                                                                                                                                       |
| 33 | <b>CSR</b> | 94 | 2011 A. Wakai, R. O'Sullivan and A. McCabe Intra-articular lignocaine versus intravenous analgesia with or without sedation for manual reduction of acute anterior  |
| 34 |            |    | shoulder dislocation in adults                                                                                                                                      |
| 35 | <b>CSR</b> | 95 | 2013 H. Chang Zhi and Y. Liu Zhao Subintimal angioplasty for chronic lower limb arterial occlusion                                                                  |
| 36 | <b>CSR</b> | 96 | 2014 L. Moja, E. Lucenteforte, H. Kwag Koren, V. Bertele, A. Campomori, U. Chakravarthy, R. D'Amico, K. Dickersin, L. Kodjikian, K. Lindsley, Y. Loke, M. Maguire,  |
| 37 |            |    | F. Martin Daniel, A. Mugelli, B. Mühlbauer, I. Püntmann, B. Reeves, C. Rogers, C. Schmucker, L. Subramanian Manju and G. Virgili Systemic safety of bevacizumab     |
| 38 | <b>CSR</b> | 97 | versus ranibizumab for neovascular age-related macular degeneration                                                                                                 |
| 39 | <b>CSR</b> | 98 | 2013 L. Robertson and A. Roche Primary prophylaxis for venous thromboembolism in people undergoing major amputation of the lower extremity                          |
| 40 |            |    |                                                                                                                                                                     |
| 41 | <b>CSR</b> | 97 | 2015 N. Magula and M. Dedicoat Low dose versus high dose stavudine for treating people with HIV infection                                                           |
| 42 |            |    |                                                                                                                                                                     |
| 43 | <b>CSR</b> | 98 | 2014 N. Ghamami, Y. Chiang Sandy Hsiang, C. Dormuth and M. Wright James Time course for blood pressure lowering of dihydropyridine calcium channel blockers         |
| 44 |            |    |                                                                                                                                                                     |
| 45 |            |    |                                                                                                                                                                     |
| 46 |            |    |                                                                                                                                                                     |

- 1  
2  
3 **SR** 99 2015 A. Sculean, D. Nikolidakis, G. Nikou, A. Ivanovic, I. L. C. Chapple and A. Stavropoulos Biomaterials for promoting periodontal regeneration in human intrabony defects: a systematic review *Periodontology* 2000
- 4 **SR** 100 2015 R. Bright, K. Hynes, S. Gronthos and P. M. Bartold Periodontal ligament-derived cells for periodontal regeneration in animal models: a systematic review *Journal Of Periodontal Research*
- 5 **SR** 101 2011 A. V. Hernandez, A. Usmani, A. Rajamanickam and A. Moheet Thiazolidinediones and risk of heart failure in patients with or at high risk of type 2 diabetes mellitus: A meta-analysis and meta-regression analysis of placebo-controlled randomized clinical trials *American Journal of Cardiovascular Drugs*
- 6 **SR** 102 2014 P. C. Valery, S. P. Moore, J. Meiklejohn and F. Bray International variations in childhood cancer in indigenous populations: A systematic review *The Lancet Oncology*
- 7 **SR** 103 2015 S. H. Kim, N. Stoicea, S. Soghomonyan and S. D. Bergese Remifentanyl-Acute opioid tolerance and opioid-induced hyperalgesia: A systematic review *American Journal of Therapeutics*
- 8 **SR** 104 2011 X. Xiao, L. Li, Y. Feng, Y. S. Jiang, Q. W. He, X. G. Tan and S. Y. Tang Sevoflurane in the anesthesia of child short period surgery: A systematic review *Chinese Journal of Evidence-Based Medicine*
- 9 **SR** 105 2013 A. Ranjan, E. Penninga, A. M. Jelsig, H. C. Hasselbalch and O. W. Bjerrum Inheritance of the chronic myeloproliferative neoplasms. A systematic review *Clinical Genetics*
- 10 **SR** 106 2015 A. Usenbo, V. Kramer, T. Young and A. Musekiwa Prevalence of arthritis in Africa: A systematic review and meta-analysis *PLoS ONE*
- 11 **SR** 107 2012 W. Siebert Adhesions after previous cesarean section. Meta-analysis and systematic review *Gynakologische Praxis*
- 12 **SR** 108 2012 M. T. Drake, M. H. Murad, K. F. Mauck, M. A. Lane, C. Undavalli, T. Elraiyah, L. M. Stuart, C. Prasad, A. Shahrour, R. J. Mullan, A. Hazem, P. J. Erwin and V. M. Montori Risk factors for low bone mass-related fractures in men: A systematic review and meta-analysis *Journal of Clinical Endocrinology and Metabolism*
- 13 **SR** 109 2013 E. N. Butler, N. Chawla, J. Lund, L. C. Harlan, J. L. Warren and K. R. Yabroff Patterns of colorectal cancer care in the United States and Canada: A systematic review
- 14 **SR** 110 2014 L. Montin and J. M. Koivisto Effectiveness of self-directed learning methods compared with other learning methods in nursing education related to nursing students' or registered nurses' learning outcomes: A systematic review protocol *JBI Database of Systematic Reviews and Implementation Reports*
- 15 **SR** 111 2015 A. Jindal, A. Bal and R. Agarwal Inflammatory myofibroblastic tumor of the trachea in the pediatric age group: Case report and systematic review of the literature *Journal of Bronchology and Interventional Pulmonology*
- 16 **SR** 112 2011 C. Baldwin and N. K. Brusco The effect of vocational rehabilitation on return-to-work rates post stroke: A systematic review *Topics in Stroke Rehabilitation*
- 17 **SR** 113 2012 S. Sundar, J. Wu, K. Hillaby, J. Yap and R. Lilford A systematic review evaluating the relationship between progression free survival and post progression survival in advanced ovarian cancer *Gynecologic Oncology*
- 18 **SR** 114 2013 A. K. Detjen, A. R. DiNardo, J. Leyden, K. R. Steingart, D. Menzies, I. Schiller, N. Dendukuri and A. M. Mandalakas Xpert MTB/RIF for the diagnosis of tuberculosis in children-a systematic review and meta-analysis *American Journal of Tropical Medicine and Hygiene*
- 19 **SR** 115 2012 A. Bellemain-Appaix, S. A. O'Connor, J. Silvain, M. Cucherat, F. Beygui, O. Barthelme, J. P. Collet, L. Jacq, F. Bernasconi and G. Montalescot Association of clopidogrel pretreatment with mortality, cardiovascular events, and major bleeding among patients undergoing percutaneous coronary intervention: A systematic review and meta-analysis *JAMA - Journal of the American Medical Association*
- 20 **SR** 116 2011 J. Liese, F. Ulrich, T. Schreckenbach, M. Wahle, S. Zeuzem, W. O. Bechstein and C. Moench A rare cause of acute liver failure: Adult onset still's disease-case report and systematic review of the literature *Transplant International*
- 21 **SR** 117 2013 A. Davie, V. Damera, F. Bianic, J. Ricci, P. Bernhardt, S. Gokhale and J. Lake CNI-related renal impairment in liver transplantation: A comparison of cyclosporine and tacrolimus-based regimens *American Journal of Transplantation*
- 22 **SR** 118 2013 J. Loar Diagnostic accuracy and radiation dose of CT coronary angiography in atrial fibrillation: Systematic review and meta-analysis: Vorre MM, Abdulla J. *Radiology* 2013;267:376-86 *Journal of Emergency Medicine*
- 23 **SR** 119 2014 V. Sharma, S. V. Deo, S. E. Altarabsheh, Y. H. Cho, P. J. Erwin and S. J. Park Comparison of the early haemodynamics of stented pericardial and porcine aortic valves *European Journal of Cardio-thoracic Surgery*
- 24 **SR** 120 2014 L. H. Van Tuyl, W. F. Lems and M. Boers Measurement of stiffness in patients with rheumatoid arthritis in low disease activity or remission: A systematic review *BMC Musculoskeletal Disorders*
- 25 **SR** 121 2013 D. Shumay, F. Del Gaudio, M. Melisko and L. Dunn Factors related to fear of recurrence in breast cancer survivors *Psycho-Oncology*
- 26 **SR** 122 2012 A. Rawlinson, N. Kitchingham, C. Hart, G. McMahon, S. L. Ong and A. Khanna Mechanisms of reducing postoperative pain, nausea and vomiting: A systematic review of current techniques *Evidence-Based Medicine*



- 1  
2  
3 **SR** 123 2014 L. Chen, Z. Xiao-Qing, L. Qin and W. Hong Influencing factors related to sun protection in children and adolescents: A systematic review Chinese Journal of Evidence-Based Medicine
- 4 **SR** 124 2012 S. Y. Qin, H. X. Jiang, H. J. Ning, H. M. Nie, L. Tao, B. L. Hu and X. Y. Guo Effect of Helicobacter pylori eradication on blood ammonia levels in cirrhotic patients: A systematic review Hepato-Gastroenterology
- 5 **SR** 125 2015 S. A. Mller, P. Vavken and G. Pagenstert Simulated activity but real trauma: A systematic review on nintendo wii injuries based on a case report of an acute anterior cruciate ligament rupture Medicine (United States)
- 6 **SR** 126 2014 S.-H. Kim, M. Lilot, K. S. Sidhu, J. Rinehart, Z. Yu, C. Canales and M. Cannesson Accuracy and precision of continuous noninvasive arterial pressure monitoring compared with invasive arterial pressure: a systematic review and meta-analysis Anesthesiology
- 7 **SR** 127 2012 J. W. Nickerson, S. Chackungal, L. Knowlton, K. McQueen and F. M. Burkle Surgical care during humanitarian crises: a systematic review of published surgical caseload data from foreign medical teams Prehospital And Disaster Medicine
- 8 **SR** 128 2011 D. M. Zulman, J. B. Sussman, X. Chen, C. T. Cigolle, C. S. Blaum and R. A. Hayward Examining the evidence: A systematic review of the inclusion and analysis of older adults in randomized controlled trials Journal of General Internal Medicine
- 9 **SR** 129 2015 S. Singh, S. K. Venkatesh, Z. Wang, F. H. Miller, U. Motosugi, R. N. Low, T. Hassanein, P. Asbach, E. M. Godfrey, M. Yin, J. Chen, A. P. Keaveny, M. Bridges, A. Bohte, M. H. Murad, D. J. Lomas, J. A. Talwalkar and R. L. Ehman Diagnostic performance of magnetic resonance elastography in staging liver fibrosis: A systematic review and meta-analysis of individual participant data Clinical Gastroenterology and Hepatology
- 10 **SR** 130 2011 D. Hergan, D. Thut, O. Sherman and M. S. Day Meniscal allograft transplantation Arthroscopy - Journal of Arthroscopic and Related Surgery
- 11 **SR** 131 2015 Z. Gong and D. Zhao Cardiovascular diseases and risk factors among Chinese immigrants Internal And Emergency Medicine
- 12 **SR** 132 2014 R. W. Jordan, N. A. Smith, G. S. Chahal, C. Casson, M. R. Reed and A. P. Sprowson Enhanced education and physiotherapy before knee replacement; is it worth it? A systematic review Physiotherapy (United Kingdom)
- 13 **SR** 133 2014 F. Lalidou, G. Kolios, A. Tavridou and G. I. Drosos Bone grafts as carriers for local antibiotic delivery for the treatment and prevention of bone infections Surgical Technology International
- 14 **SR** 134 2012 S. Cheng, L. Grasso, J. A. Martinez-Orozco, R. Al-Agha, R. Pivonello, A. Colao and S. Ezzat Pregnancy in acromegaly: Experience from two referral centers and systematic review of the literature Clinical Endocrinology
- 15 **SR** 135 2015 F. Wu, S. Weng, C. Li, J. Sun, L. Li and Q. Gao Submandibular gland transfer for the prevention of postradiation xerostomia in patients with head and neck cancer: A systematic review and meta-analysis ORL
- 16 **SR** 136 2015 R. Torn, A. Rodrguez-Hernndez, T. Bernard, F. Arikani Abell, J. Vilalta Castan and J. Sahuquillo Subarachnoid hemorrhage in systemic lupus erythematosus: Systematic review and report of three cases Clinical Neurology and Neurosurgery
- 17 **SR** 137 2012 K. Jokiniemi, A.-M. Pietil, J. Kylm and K. Haatainen Advanced nursing roles: a systematic review Nursing & Health Sciences
- 18 **SR** 138 2014 D. Gerstner, S. Walsler, B. Brenner, J. Bnger, T. Eikmann, M. Raulf-Heimsoth, A. Kolk, D. Nowak, H. Sagunski, N. Sedlmaier, R. Suchenwirth, G. Wiesmller, K. M. Wollin, I. Tesseraux and C. Herr Health relevance of exposure to bioaerosols Allergologie
- 19 **SR** 139 2011 E. Kurth, H. P. Kennedy, E. Spichiger, I. Hsli and E. Zemp Stutz Crying babies, tired mothers: What do we know? A systematic review Midwifery
- 20 **SR** 140 2013 D. A. Cook, R. Brydges, B. Zendejas, S. J. Hamstra and R. Hatala Technology-enhanced simulation to assess health professionals: A systematic review of validity evidence, research methods, and reporting quality Academic Medicine
- 21 **SR** 141 2015 L. Xia, X. Wang, T. Xu, X. Zhang, Z. Zhu, L. Qin, X. Zhang, C. Fang, M. Zhang, S. Zhong and Z. Shen Robotic versus open radical cystectomy: An updated systematic review and meta-analysis PLoS ONE
- 22 **SR** 142 2014 R. S. Taylor, M. J. Desai, P. Rigoard and R. J. Taylor Predictors of pain relief following spinal cord stimulation in chronic back and leg pain and failed back surgery syndrome: A systematic review and meta-regression analysis Pain Practice
- 23 **SR** 143 2011 N. Manouchehri, D. W. Birch, X. Shi, G. Hadi and S. Karmali Heated versus cold insufflation for minimally invasive abdominal surgery has minimal benefit on patient outcomes Surgical Endoscopy and Other Interventional Techniques
- 24 **SR** 144 2012 E. Chiappini, G. Accetta, F. Bonsignori, V. Boddp, L. Galli, A. Biggeri and M. De Martino Interferon- release assays for the diagnosis of mycobacterium tuberculosis infection in children: A systematic review and meta-analysis International Journal of Immunopathology and Pharmacology
- 25 **SR** 145 2013 S. J. Carson Limited evidence for existing caries assessment systems Evidence-Based Dentistry
- 26 **SR** 146 2014 C. Siriwardhana, S. S. Ali, B. Roberts and R. Stewart A systematic review of resilience and mental health outcomes of conflict-driven adult forced migrants Conflict And Health
- 27  
28  
29  
30  
31  
32  
33  
34  
35  
36  
37  
38  
39  
40  
41  
42  
43  
44  
45  
46



- 1  
2  
3 **SR** 147 2013 C. Chamberlain, B. McNamara, E. D. Williams, D. Yore, B. Oldenburg, J. Oats and S. Eades Diabetes in pregnancy among indigenous women in australia, canada, new zealand and the united states: A systematic review of the evidence for screening in early pregnancy *Diabetes/Metabolism Research and Reviews*
- 4 **SR** 148 2012 R. M. Leadley, N. Armstrong, Y. C. Lee, A. Allen and J. Kleijnen Chronic diseases in the European Union: The prevalence and health cost implications of chronic pain *Journal of Pain and Palliative Care Pharmacotherapy*
- 5 **SR** 149 2012 K. Xiangjun To ensure all ward 22a patients on atypical antipsychotics are monitored according to protocol *Annals of the Academy of Medicine Singapore*
- 6 **SR** 150 2011 N. D. Weatherley and P. R. Jackson The new Sheffield risk and benefit tables for the elderly *QJM*
- 7 **SR** 151 2013 J. A. Strigley, D. Lightfoot, G. Fernie, M. Gardam and M. P. Muller Hand hygiene monitoring technology: protocol for a systematic review *Systematic reviews*
- 8 **SR** 152 2013 J. L. Morgan, K. Thomas, S. Braungart and R. L. Nelson Transparent cap colonoscopy versus standard colonoscopy: A systematic review and meta-analysis *Techniques in Coloproctology*
- 9 **SR** 153 2012 A. Hahn, D. Jochai, C. Caufield-Noll, R. Rios, L. Allen and G. Cordts Self inflicted burns: A systematic review of the literature *Journal of Burn Care and Research*
- 10 **SR** 154 2013 *Canadian Respiratory Journal*
- 11 **SR** 155 2014 S. R. Dawe, J. A. Windsor, J. A. J. L. Broeders, P. C. Cregan, P. J. Hewett and G. J. Maddern A systematic review of surgical skills transfer after simulation-based training: Laparoscopic cholecystectomy and endoscopy *Annals of Surgery*
- 12 **SR** 156 2015 C. Xiong, G. Liu, R. Ma, J. Xue and A. Wu Efficacy of palonosetron for preventing postoperative nausea and vomiting: a systematic review and meta-analysis *Canadian Journal of Anesthesia*
- 13 **SR** 157 2012 J. C. O'Horo, G. L. M. Silva, L. S. Munoz-Price and N. Safdar The efficacy of daily bathing with chlorhexidine for reducing healthcare-associated bloodstream infections: a meta-analysis *Infection Control And Hospital Epidemiology*
- 14 **SR** 158 2014 J. Rehm, S. Kailasapillai, E. Larsen, M. X. Rehm, A. V. Samokhvalov, K. D. Shield, M. Roerecke and D. W. Lachenmeier A systematic review of the epidemiology of unrecorded alcohol consumption and the chemical composition of unrecorded alcohol *Addiction (Abingdon, England)*
- 15 **SR** 159 2013 V. Schadewaldt, E. McInnes, J. E. Hiller and A. Gardner Views and experiences of nurse practitioners and medical practitioners with collaborative practice in primary health care - an integrative review *BMC Family Practice*
- 16 **SR** 160 2014 Z. Hao, C. Yang, M. Liu and B. Wu Renal dysfunction and thrombolytic therapy in patients with acute ischemic stroke: A systematic review and meta-analysis *Medicine (United States)*
- 17 **SR** 161 2015 T. Kishi, S. Matsunaga and N. Iwata Suvorexant for primary insomnia: A systematic review and meta-analysis of randomized placebo-controlled trials *PLoS ONE*
- 18 **SR** 162 2015 C. J. Jones, H. E. Smith and C. D. Llewellyn A systematic review of the effectiveness of interventions using the Common Sense Self-Regulatory Model to improve adherence behaviours *Journal Of Health Psychology*
- 19 **SR** 163 2014 A. White Outpatient interventions for hepatology patients with fluid retention: a review and synthesis of the literature *Gastroenterology Nursing: The Official Journal Of The Society Of Gastroenterology Nurses And Associates*
- 20 **SR** 164 2013 M. Williams, L. Lewis, Z. McKeough, A. Holland, A. Lee, R. McNamara, A. Phillips, L. Wiles, L. Dowman, S. Wootton, M. Milross and T. Effing Association between exercise session attendance and improvements in exercise outcomes in people with COPD *Respirology*
- 21 **SR** 165 2014 E. Heck, N. Jaworska, E. DeSomma, A. S. Dhoopar, F. P. MacMaster, D. Dewey and G. MacQueen A survey of mental health services at post-secondary institutions in Alberta *Canadian Journal of Psychiatry*
- 22 **SR** 166 2013 A. M. N. Renzaho, P. Romios, C. Crock and A. L. SÅnderlund The effectiveness of cultural competence programs in ethnic minority patientcentered health care- a systematic review of the literature *International Journal for Quality in Health Care*
- 23 **SR** 167 2011 J. L. Soong and W. H. Lim Vasopressin and terlipressin in the treatment of vasodilatory septic shock: A systematic review *Proceedings of Singapore Healthcare*
- 24 **SR** 168 2015 C. E. Sexton, J. F. Betts, N. Demnitz, H. Dawes, K. P. Ebmeier and H. Johansen-Berg A systematic review of MRI studies examining the relationship between physical fitness and activity and the white matter of the ageing brain *Neuroimage*
- 25 **SR** 169 2014 M. Foroozan, A. Beauchet, E. Funck-Brentano, J. F. Sei and P. Saiag Current evidence on recurrence rate of basal cell and squamous cell carcinomas treated by Mohs micrographic surgery: Systematic review *Journal of the American Academy of Dermatology*
- 26 **SR** 170 2014 Q. Zhang, J. Li, F. Liu and Z. Li Comments on Li H et al. A systematic review of matrix metalloproteinase 9 as a biomarker of survival in patients with osteosarcoma *Tumor Biology*
- 27 **SR** 171 2013 D. Coghill, T. Banaschewski, A. Zuddas, A. Pelaz, A. Gagliano and M. Doepfner Long-acting methylphenidate formulations in the treatment of attention-deficit/hyperactivity disorder: A systematic review of head-to-head studies *BMC Psychiatry*

|    |    |     |                                                                                                                                                                                                                                                                                                                                                                                                                                                        |
|----|----|-----|--------------------------------------------------------------------------------------------------------------------------------------------------------------------------------------------------------------------------------------------------------------------------------------------------------------------------------------------------------------------------------------------------------------------------------------------------------|
| 1  |    |     |                                                                                                                                                                                                                                                                                                                                                                                                                                                        |
| 2  |    |     |                                                                                                                                                                                                                                                                                                                                                                                                                                                        |
| 3  | SR | 172 | 2014 M. Sacchetti, F. Mantelli, A. Lambiase, A. Mastropasqua, D. Merlo and S. Bonini Systematic review of randomised clinical trials on topical ciclosporin a for the treatment of dry eye disease British Journal of Ophthalmology                                                                                                                                                                                                                    |
| 4  |    |     |                                                                                                                                                                                                                                                                                                                                                                                                                                                        |
| 5  | SR | 173 | 2013 J. A. Cramer, C. Sapin and C. Fran ois Indirect comparison of clobazam and other therapies for Lennox-Gastaut syndrome Acta Neurologica Scandinavica                                                                                                                                                                                                                                                                                              |
| 6  | SR | 174 | 2012 O. L. Rueda-Ochoa, D. Munoz-Suarez, L. Calvo-Betancourt, E. Lopez, C. Vargas, M. Delgado and C. Morillo Heart rate variability as a prognostic marker of mortality in patients with myocardial infarction systematic review and meta-analysis Europace                                                                                                                                                                                            |
| 7  |    |     |                                                                                                                                                                                                                                                                                                                                                                                                                                                        |
| 8  | SR | 175 | 2015 G. Hatfield, C. Hammond and M. A. Hunt Clinical tests of balance in the knee osteoarthritis population: A systematic review Osteoarthritis and Cartilage                                                                                                                                                                                                                                                                                          |
| 9  | SR | 176 | 2014 N. Christopher, N. Mehta and R. Sinert Systematic review: Lung ultrasound for the diagnosis of pneumonia in the emergency department Academic Emergency Medicine                                                                                                                                                                                                                                                                                  |
| 10 |    |     |                                                                                                                                                                                                                                                                                                                                                                                                                                                        |
| 11 | SR | 177 | 2013 E. Nettis, P. Delle Donne, E. Di Leo, G. F. Calogiuri, A. Ferrannini and A. Vacca Rupatadine for the treatment of urticaria Expert Opinion on Pharmacotherapy                                                                                                                                                                                                                                                                                     |
| 12 | SR | 178 | 2015 F. A. Zeiler, K. J. Zeiler, J. Teitelbaum, L. M. Gillman and M. West VNS for refractory status epilepticus Epilepsy Research                                                                                                                                                                                                                                                                                                                      |
| 13 | SR | 179 | 2012 N. Sofaer and D. Strech The need for systematic reviews of reasons Bioethics                                                                                                                                                                                                                                                                                                                                                                      |
| 14 |    |     |                                                                                                                                                                                                                                                                                                                                                                                                                                                        |
| 15 | SR | 180 | 2014 C. Lecl re, S. Viaux, M. Avril, C. Achard, M. Chetouani, S. Missonnier and D. Cohen Why synchrony matters during mother-child interactions: A systematic review PLoS ONE                                                                                                                                                                                                                                                                          |
| 16 | SR | 181 | 2012 V. Patel, P. Patel and J. Dawson Comment on: Non-infectious pulmonary toxicity of rituximab: A systematic review Rheumatology (United Kingdom)                                                                                                                                                                                                                                                                                                    |
| 17 |    |     |                                                                                                                                                                                                                                                                                                                                                                                                                                                        |
| 18 | SR | 182 | 2015 K. E. O'Sullivan, E. T. Hurley, R. Segurado, D. Sugrue and J. P. Hurley Transaortic TAVI is a valid alternative to transapical approach Journal of Cardiac Surgery                                                                                                                                                                                                                                                                                |
| 19 | SR | 183 | 2013 S.-H. Tseng, H.-C. Chen and K.-W. Tam Systematic review and meta-analysis of the effect of equine assisted activities and therapies on gross motor outcome in children with cerebral palsy Disability And Rehabilitation                                                                                                                                                                                                                          |
| 20 |    |     |                                                                                                                                                                                                                                                                                                                                                                                                                                                        |
| 21 | SR | 184 | 2014 T. T. Jayakrishnan, R. T. Groeschl, B. George, J. P. Thomas, S. Pappas, T. C. Gamblin and K. K. Turaga Management of acute cholecystitis in cancer patients: A comparative effectiveness approach Surgical Endoscopy and Other Interventional Techniques                                                                                                                                                                                          |
| 22 | SR | 185 | 2015 G. S. Alves, V. Oertel Kn chel, C. Kn chel, A. F. Carvalho, J. Pantel, E. Engelhardt and J. Laks Integrating retrogenesis theory to alzheimer's disease pathology: Insight from DTI-TBSS investigation of the white matter microstructural integrity BioMed Research International                                                                                                                                                                |
| 23 |    |     |                                                                                                                                                                                                                                                                                                                                                                                                                                                        |
| 24 | SR | 186 | 2014 K. M. Huster, A. M ller, M. J. Prohn, D. Nowak and B. Herbig Medical risks in older pilots: a systematic review on incapacitation and age International archives of occupational and environmental health                                                                                                                                                                                                                                         |
| 25 | SR | 187 | 2011 A. Alcaraz, J. Gonz lez-Zuelgaray and F. Augustovski Cost-effectiveness of cardioverter defibrillators in patients with risk factors for sudden death in Argentina Value in Health                                                                                                                                                                                                                                                                |
| 26 |    |     |                                                                                                                                                                                                                                                                                                                                                                                                                                                        |
| 27 | SR | 188 | 2013 A. Lopez, V. Billioud, C. Peyrin-Biroulet and L. Peyrin-Biroulet Adherence to anti-TNF therapy in inflammatory bowel diseases: A systematic review Inflammatory Bowel Diseases                                                                                                                                                                                                                                                                    |
| 28 | SR | 189 | 2013 M. Khan, C. Wendel, H. Thai and M. Movahed Failed percutaneous recanalization of chronic total occlusion is associated with higher in-hospital mortality: A systematic review and meta-analysis of the literature Catheterization and Cardiovascular Interventions                                                                                                                                                                                |
| 29 |    |     |                                                                                                                                                                                                                                                                                                                                                                                                                                                        |
| 30 | SR | 190 | 2014 C. E. Neville, M. C. McKinley, V. A. Holmes, D. Spence and J. V. Woodside The relationship between breastfeeding and postpartum weight change-a systematic review and critical evaluation International Journal of Obesity                                                                                                                                                                                                                        |
| 31 | SR | 191 | 2014 G. Hawley, T. Janamian, C. Jackson and S. A. Wilkinson In a maternity shared-care environment, what do we know about the paper hand-held and electronic health record: A systematic literature review BMC Pregnancy and Childbirth                                                                                                                                                                                                                |
| 32 |    |     |                                                                                                                                                                                                                                                                                                                                                                                                                                                        |
| 33 | SR | 192 | 2013 F. A. Raja, N. Counsell, N. Colombo, J. Pfisterer, A. du Bois, M. K. Parmar, I. B. Vergote, A. Gonzalez-Martin, D. S. Alberts, M. Plante, V. Torri and J. A. Ledermann Platinum versus platinum-combination chemotherapy in platinum-sensitive recurrent ovarian cancer: A meta-analysis using individual patient data Annals of Oncology                                                                                                         |
| 34 |    |     |                                                                                                                                                                                                                                                                                                                                                                                                                                                        |
| 35 | SR | 193 | 2015 S. Lipka, R. Rabbanifard, A. Kumar and P. Brady Single versus double balloon enteroscopy for small bowel diagnostics: A systematic review and meta-analysis Journal of Clinical Gastroenterology                                                                                                                                                                                                                                                  |
| 36 |    |     |                                                                                                                                                                                                                                                                                                                                                                                                                                                        |
| 37 | SR | 194 | 2011 B. Wilhelm, A. Raji , J. D. Greig, L. Waddell and J. Harris The effect of Hazard analysis critical control point programs on microbial contamination of carcasses in abattoirs: A systematic review of published data Foodborne Pathogens and Disease                                                                                                                                                                                             |
| 38 |    |     |                                                                                                                                                                                                                                                                                                                                                                                                                                                        |
| 39 | SR | 195 | 2015 K. V. Hurst, R. Lee, I. Milosevic and A. Handa Re: 'Efficacy and Safety of the New Oral Anticoagulants Dabigatran, Rivaroxaban, Apixaban, and Edoxaban in the Treatment and Secondary Prevention of Venous Thromboembolism: A Systematic Review and Meta-analysis of Phase III Trials'- Key Learning Points for Surgeons European Journal Of Vascular And Endovascular Surgery: The Official Journal Of The European Society For Vascular Surgery |
| 40 |    |     |                                                                                                                                                                                                                                                                                                                                                                                                                                                        |
| 41 |    |     |                                                                                                                                                                                                                                                                                                                                                                                                                                                        |
| 42 |    |     |                                                                                                                                                                                                                                                                                                                                                                                                                                                        |
| 43 |    |     |                                                                                                                                                                                                                                                                                                                                                                                                                                                        |
| 44 |    |     |                                                                                                                                                                                                                                                                                                                                                                                                                                                        |
| 45 |    |     |                                                                                                                                                                                                                                                                                                                                                                                                                                                        |
| 46 |    |     |                                                                                                                                                                                                                                                                                                                                                                                                                                                        |

- 1  
2  
3 **SR** 196 2014 A. K. Antony, A. K. Antony and J. L. Hootnick Ulnar forearm free flaps in head and neck reconstruction: Systematic review of the literature and a case report  
Microsurgery
- 4 **SR** 197 2015 M. Pantelic, Y. Shenderovich, L. Cluver and M. Boyes Predictors of internalised HIV-related stigma: a systematic review of studies in sub-Saharan Africa Health  
Psychology Review
- 5 **SR** 198 2013 Z. Zhang, J. Xu, Y. Yao, S. Chu, H. Cheng, D. Chen and P. Zhong Giant cell tumors of the skull: A series of 18 cases and review of the literature Journal of  
Neuro-Oncology
- 6 **SR** 199 2015 O. C. Freedman, G. G. Fletcher, S. Gandhi, M. Mates, S. F. Dent, M. E. Trudeau and A. Eisen Adjuvant endocrine therapy for early breast cancer: A systematic  
review of the evidence for the 2014 cancer care Ontario systemic therapy guideline Current Oncology
- 7 **SR** 200 2014 H. J. Carr, A. McDermott, H. Tadbiri, A. M. Uebbing and M. Londrigan The effectiveness of computer-based learning in hospitalized adults with heart failure on  
knowledge, re-admission, self-care, quality of life and patient satisfaction: A systematic review JBI Database of Systematic Reviews and Implementation Reports
- 8 **SR** 201 2013 M. Frank and T. Mittendorf Influence of pharmacogenomic profiling prior to pharmaceutical treatment in metastatic colorectal cancer on cost effectiveness: A  
systematic review Pharmacoeconomics
- 9 **SR** 202 2015 F. V. Do Nascimento, V. Piccoli, M. A. Beer, A. D. Von Frankenberg, D. Crispim and F. Gerchman Association of HSD11B1 polymorphic variants and adipose  
tissue gene expression with metabolic syndrome, obesity and type 2 diabetes mellitus: A systematic review Diabetology and Metabolic Syndrome
- 10 **SR** 203 2012 A. J. McKay, P. A. Mahesh, J. Z. Fordham and A. Majeed Prevalence of COPD in India: A systematic review Primary Care Respiratory Journal
- 11 **SR** 204 2015 J. G. Cárdena-Soriano, R. Puri, I. Amat-Santos, H. B. Ribeiro, O. Abdul-Jawad Altisent, M. del Trigo, J.-M. Paradis, E. Dumont, M. Urena and J. Rodríguez-  
Cabau Valve thrombosis following transcatheter aortic valve implantation: a systematic review Revista Española De Cardiología (English Ed.)
- 12 **SR** 205 2012 A. Tan, D. T. Tan, X.-W. Tan and J. S. Mehta Osteo-odonto keratoprosthesis: systematic review of surgical outcomes and complication rates The Ocular Surface
- 13 **SR** 206 2014 E. W. Somerville, P. F. Chinnery, G. S. Gorman and R. W. Taylor Genotypic and phenotypic heterogeneity in adult-onset progressive external ophthalmoplegia  
(PEO) with mitochondrial DNA instability: A systematic review Neuromuscular Disorders
- 14 **SR** 207 2015 G. Lippi, C. Mattiuzzi and M. Franchini Sleep apnea and venous thromboembolism. A systematic review Thrombosis And Haemostasis
- 15 **SR** 208 2012 H. M. van Loo, P. de Jonge, J.-W. Romeijn, R. C. Kessler and R. A. Schoevers Data-driven subtypes of major depressive disorder: a systematic review BMC  
Medicine
- 16 **SR** 209 2013 C. Kriza, M. Emmert, P. Wahlster, C. Niederländer and P. Kolominsky-Rabas A comparison of the main cost-effectiveness drivers of virtual colonography  
versus conventional colonoscopy for colorectal cancer screening: An international review Annals of Oncology
- 17 **SR** 210 2015 R. A. G. de Ruijter, B. Stegenga, R. M. H. Schaub, M. F. Reneman and B. Middel Determinants of physical and mental health complaints in dentists: a  
systematic review Community Dentistry And Oral Epidemiology
- 18 **SR** 211 2011 K. Leitmeyer European risk assessment guidance for infectious diseases transmitted on aircraft--the RAGIDA project Euro Surveillance: Bulletin Européen Sur  
Les Maladies Transmissibles = European Communicable Disease Bulletin
- 19 **SR** 212 2011 M. Fitzharris, J. Yu, N. Hammond, C. Taylor, Y. Wu, S. Finfer and J. Myburgh Injury in China: A systematic review of injury surveillance studies conducted in  
Chinese hospital emergency departments BMC Emergency Medicine
- 20 **SR** 213 2011 A. C. Linhares, J. A. Stupka, A. Ciapponi, A. E. Bardach, D. Glujovsky, P. K. Aruj, A. Mazzoni, J. A. B. Rodriguez, A. Rearte, T. M. Lanzieri, E. Ortega-Barria and  
R. Colindres Burden and typing of rotavirus group A in Latin America and the Caribbean: Systematic review and meta-analysis Reviews in Medical Virology
- 21 **SR** 214 2013 L. Billeci, F. Sicca, K. Maharatna, F. Apicella, A. Narzisi, G. Campatelli, S. Calderoni, G. Pioggia and F. Muratori On the application of Quantitative EEG for  
characterizing autistic brain: A systematic review Frontiers in Human Neuroscience
- 22 **SR** 215 2015 K. V. Sendt, D. K. Tracy and S. Bhattacharyya A systematic review of factors influencing adherence to antipsychotic medication in schizophrenia-spectrum  
disorders Psychiatry Research
- 23 **SR** 216 2011 R. F. Johnson and J. Gustin Acute renal failure requiring renal replacement therapy in the intensive care unit: Impact on prognostic assessment for shared  
decision making Journal of Palliative Medicine
- 24 **SR** 217 2013 H. Wang, T. Chen, H. Wang, Y. Song, X. Li and J. Wang A systematic review of the physiological and operative severity score for the enumeration of mortality  
and morbidity and its Portsmouth modification as predictors of post-operative morbidity and mortality in patients undergoing pancreatic surgery American Journal of  
Surgery
- 25 **SR** 218 2013 H. B. J.H Role of occupational therapy in dysphagia management for children with special needs Archives of Physical Medicine and Rehabilitation
- 26 **SR** 219 2015 R. M. Cervero and J. K. Gaines The impact of CME on physician performance and patient health outcomes: an updated synthesis of systematic reviews The  
Journal Of Continuing Education In The Health Professions

|    |    |     |                                                                                                                                                                                                                                                                                                                             |
|----|----|-----|-----------------------------------------------------------------------------------------------------------------------------------------------------------------------------------------------------------------------------------------------------------------------------------------------------------------------------|
| 1  |    |     |                                                                                                                                                                                                                                                                                                                             |
| 2  |    |     |                                                                                                                                                                                                                                                                                                                             |
| 3  | SR | 220 | 2015 G. N. Marta, R. Riera, C. R. Macedo, G. De Castro Jr, A. L. Carvalho and L. P. Kowalski Induction chemotherapy prior to surgery with or without postoperative radiotherapy for oral cavity cancer patients: Systematic review and meta-analysis Head and Neck                                                          |
| 4  |    |     |                                                                                                                                                                                                                                                                                                                             |
| 5  | SR | 221 | 2014 L. Peñáz, C. B. Moreno and A. M. Gutierrez-Alvarez Pain management in Guillain-Barre syndrome: A systematic review Neurologia (Barcelona, Spain)                                                                                                                                                                       |
| 6  | SR | 222 | 2015 A. S. Patil, J. Martin, K. Tsukahara, A. Skljarevski, K. Miller, R. Towns and F. P. Schubert Pseudomonoamniotic Pregnancy: Case Report and Review of Etiologic Considerations Fetal and Pediatric Pathology                                                                                                            |
| 7  |    |     |                                                                                                                                                                                                                                                                                                                             |
| 8  | SR | 223 | 2014 B. J. Visser, R. W. Wieten, D. Kroon, I. M. Nagel, S. Bālard, M. van Vugt and M. P. Grobusch Efficacy and safety of artemisinin combination therapy (ACT) for non-falciparum malaria: a systematic review Malaria Journal                                                                                              |
| 9  | SR | 224 | 2015 I. Booksmythe, B. Mautz, J. Davis, S. Nakagawa and M. D. Jennions Facultative adjustment of the offspring sex ratio and male attractiveness: a systematic review and meta-analysis Biological Reviews Of The Cambridge Philosophical Society                                                                           |
| 10 |    |     |                                                                                                                                                                                                                                                                                                                             |
| 11 | SR | 225 | 2015 Y. F. Liu, H. Dong, Z. Chen, Y. Wang and S. H. Tu Impact of ankylosing spondylitis on sexual function: A systematic review and meta analysis Experimental and Therapeutic Medicine                                                                                                                                     |
| 12 | SR | 226 | 2013 J. Rathbone, E. Kaltenthaler, A. Richards, P. Tappenden, A. Bessey and A. Cantrell A systematic review of eculizumab for atypical haemolytic uraemic syndrome (aHUS) BMJ Open                                                                                                                                          |
| 13 |    |     |                                                                                                                                                                                                                                                                                                                             |
| 14 | SR | 227 | 2012 R. Konno, H. S. Kang and K. Makimoto The best evidence for minimizing resistance-to-care during assisted personal care for older adults with dementia in nursing homes: A systematic review JBI Database of Systematic Reviews and Implementation Reports                                                              |
| 15 | SR | 228 | 2011 M. R. Lee, J. G. Unger and R. J. Rohrich Management of the nasal dorsum in rhinoplasty: a systematic review of the literature regarding technique, outcomes, and complications Plastic and reconstructive surgery                                                                                                      |
| 16 |    |     |                                                                                                                                                                                                                                                                                                                             |
| 17 | SR | 229 | 2012 J. A. J. L. Broeders, D. J. G. H. Roks, U. Ahmed Ali, W. A. Draaisma, A. J. P. M. Smout and E. J. Hazebroek Laparoscopic anterior versus posterior fundoplication for gastroesophageal reflux disease: Systematic review and meta-analysis of randomised trials Surgical Endoscopy and Other Interventional Techniques |
| 18 |    |     |                                                                                                                                                                                                                                                                                                                             |
| 19 | SR | 230 | 2012 Y. Jia, C. Chen, C. S. Ng and S. W. Leung Meta-analysis of randomized controlled trials on the efficacy of Di'ao Xinxuekang capsule and isosorbide dinitrate in treating angina pectoris Evidence-based Complementary and Alternative Medicine                                                                         |
| 20 |    |     |                                                                                                                                                                                                                                                                                                                             |
| 21 | SR | 231 | 2012 E. Chiappini, F. Fossi, F. Bonsignori, S. Sollai, L. Galli and M. de Martino Utility of Interferon- $\beta$ Release Assay Results to Monitor Anti-Tubercular Treatment in Adults and Children Clinical Therapeutics                                                                                                    |
| 22 | SR | 232 | 2013 A. Elnahas, K. Graybiel, F. Farrokhyar, S. Gmora, M. Anvari and D. Hong Revisional surgery after failed laparoscopic adjustable gastric banding: A systematic review Surgical Endoscopy and Other Interventional Techniques                                                                                            |
| 23 |    |     |                                                                                                                                                                                                                                                                                                                             |
| 24 | SR | 233 | 2014 A. M. Noyes and P. D. Thompson A systematic review of the time course of atherosclerotic plaque regression Atherosclerosis                                                                                                                                                                                             |
| 25 | SR | 234 | 2014 E. Al-Moraissi, T. M. El-Sharkawy, T. I. El-Ghareeb and B. R. Chrcanovic Three-dimensional versus standard miniplate fixation in the management of mandibular angle fractures: A systematic review and meta-analysis International Journal of Oral and Maxillofacial Surgery                                           |
| 26 | SR | 235 | 2011 V. B. Domínguez, N. Ramos, D. García, M. Bustamante, A. Torrents, S. Varea, A. Cruceta, A. Pejenaute, H. Beleta, J. A. Arnaiz and X. Carnà Clinical trials during pregnancy: What has been done. A systematic review Basic and Clinical Pharmacology and Toxicology                                                    |
| 27 |    |     |                                                                                                                                                                                                                                                                                                                             |
| 28 | SR | 236 | 2015 M. Punukollu, N. Mushet, M. Linney, C. Hennessy and M. Morton Neuropsychiatric manifestations of Sydenham's chorea: A systematic review Developmental Medicine and Child Neurology                                                                                                                                     |
| 29 | SR | 237 | 2011 N. Dourdin, M. Wagner, P. Melnyk and D. Rindress Systematic review to assess the quality of published health economic evaluations Journal of Population Therapeutics and Clinical Pharmacology                                                                                                                         |
| 30 |    |     |                                                                                                                                                                                                                                                                                                                             |
| 31 | SR | 238 | 2013 C. Hills, K. Boshoff and K. Jewell Preferred teaching and learning approaches of students considered 'Generation Y' in health professions pre registration education: A comprehensive systematic review protocol JBI Database of Systematic Reviews and Implementation Reports                                         |
| 32 |    |     |                                                                                                                                                                                                                                                                                                                             |
| 33 | SR | 239 | 2014 E. A. Klonoff Introduction to the special section on discrimination Health Psychology: Official Journal Of The Division Of Health Psychology, American Psychological Association                                                                                                                                       |
| 34 | SR | 240 | 2013 S. Al Shemeili, S. Klein, A. Strath and D. Stewart Identifying inappropriate anticholinergic prescribing in the elderly: A systematic review International Journal of Clinical Pharmacy                                                                                                                                |
| 35 |    |     |                                                                                                                                                                                                                                                                                                                             |
| 36 | SR | 241 | 2013 M. A. d. Oliveira, H. Ribeiro and C. Castillo-Salgado Geospatial analysis applied to epidemiological studies of dengue: a systematic review Revista Brasileira De Epidemiologia = Brazilian Journal Of Epidemiology                                                                                                    |
| 37 | SR | 242 | 2014 A. C. Miller, E. M. Elamin and A. F. Suffredini Inhaled anticoagulation regimens for the treatment of smoke inhalation-associated acute lung injury: A systematic review Critical Care Medicine                                                                                                                        |
| 38 |    |     |                                                                                                                                                                                                                                                                                                                             |
| 39 | SR | 243 | 2012 M. Belvederi Murri, C. M. Pariante, P. Dazzan, N. Hepgul, A. S. Papadopoulos, P. Zunszain, M. Di Forti, R. M. Murray and V. Mondelli Hypothalamic-pituitary-adrenal axis and clinical symptoms in first-episode psychosis Psychoneuroendocrinology                                                                     |
| 40 |    |     |                                                                                                                                                                                                                                                                                                                             |
| 41 |    |     |                                                                                                                                                                                                                                                                                                                             |
| 42 |    |     |                                                                                                                                                                                                                                                                                                                             |
| 43 |    |     |                                                                                                                                                                                                                                                                                                                             |
| 44 |    |     |                                                                                                                                                                                                                                                                                                                             |
| 45 |    |     |                                                                                                                                                                                                                                                                                                                             |
| 46 |    |     |                                                                                                                                                                                                                                                                                                                             |

- 1  
2  
3 **SR** 244 2012 M. B. Zeni Systematic review of health literacy in Cochrane database studies on paediatric asthma educational interventions: Searching beyond rigorous design International Journal of Evidence-Based Healthcare
- 4 **SR** 245 2014 M. A. H. Fleuren, T. G. W. M. Paulussen, P. Van Dommelen and S. Van Buuren Towards a measurement instrument for determinants of innovations International Journal For Quality In Health Care: Journal Of The International Society For Quality In Health Care / Isqua
- 6 **SR** 246 2012 C. Yampolsky, S. Hem and D. Bendersky Dorsal column stimulator applications Surgical Neurology International
- 7 **SR** 247 2011 J. Polisen, S. Chen, K. Cimon, S. McGill, K. Forward and M. Gardam Clinical effectiveness of rapid tests for methicillin resistant Staphylococcus aureus (MRSA) in hospitalized patients: A systematic review BMC Infectious Diseases
- 9 **SR** 248 2015 Z. Hu, X. Yin, J. Liao, C. Zhou, Z. Yang and S. Zou The effect of teeth extraction for orthodontic treatment on the upper airway: a systematic review Sleep and Breathing
- 11 **SR** 249 2014 I. Cleynen, E. Vazeille, M. Artieda, H. W. Verspaget, M. Szczypiorska, M.-A. Bringer, P. L. Lakatos, F. Seibold, K. Parnell, R. K. Weersma, J. M. Mahachie John, R. Morgan-Walsh, D. Staelens, I. Arijis, G. De Hertogh, S. MÅller, A. Tordai, D. W. Hommes, T. Ahmad, C. Wijmenga, S. Pender, P. Rutgeerts, K. Van Steen, D. Lottaz, S. Vermeire and A. Darfeuille-Michaud Genetic and microbial factors modulating the ubiquitin proteasome system in inflammatory bowel disease Gut
- 13 **SR** 250 2012 A. Gupta, J. L. Chazen, M. Hartman, D. Delgado, N. Anumula, H. Shao, M. Mazumdar, A. Z. Segal, H. Kamel, D. Leifer and P. C. Sanelli Cerebrovascular reserve and stroke risk in patients with carotid stenosis or occlusion: A systematic review and meta-analysis Stroke
- 14 **SR** 251 2013 R. Armstrong, S. White, J. Streak and D. Tivey The effect of nasal introduction of anaesthetic in adults undergoing fiberoptic endoscopic evaluation of swallowing (FEES): A systematic review protocol JBI Database of Systematic Reviews and Implementation Reports
- 16 **SR** 252 2015 Q. Gao, K. K. F. Tsoi, H. W. Hirai, M. C. S. Wong, F. K. L. Chan, J. C. Y. Wu, J. Y. W. Lau, J. J. Y. Sung and S. C. Ng Serrated polyps and the risk of synchronous colorectal advanced neoplasia: A systematic review and meta-analysis American Journal of Gastroenterology
- 17 **SR** 253 2015 R. Sproat, P. Radford and A. Hunt Hemostatic glues in tonsillectomy: A systematic review Laryngoscope
- 18 **SR** 254 2014 L. Bourke, D. J. Rosario, L. Steed and S. J. C. Taylor Response to comment on 'Interventions to improve exercise behaviour in sedentary people living with and beyond cancer: A systematic review' British Journal of Cancer
- 20 **SR** 255 2014 G. J. Rodrigo and V. Plaza Efficacy and safety of a fixed-dose combination of indacaterol and glycopyrronium for the treatment of COPD: A systematic review Chest
- 22 **SR** 256 2011 J. Mooney, I. Ranasinghe, C. Chow, F. Barzi, S. Zoungas, T. Tan, V. Perkovic and G. Hillis Pre-operative kidney function as a predictor of adverse outcomes after surgery- A systematic review and meta-analysis Heart Lung and Circulation
- 23 **SR** 257 2015 M.-B. Ben Hadj Yahia, A. Jouin-Bortolotti and B. Dervaux Extending the Human Papillomavirus Vaccination Programme to Include Males in High-Income Countries: A Systematic Review of the Cost-Effectiveness Studies Clinical Drug Investigation
- 24 **SR** 258 2011 A. D. Singh, M. E. Turell and A. K. Topham Uveal melanoma: Trends in incidence, treatment, and survival Ophthalmology
- 26 **SR** 259 2013 B. F. Gornall, P. S. Myles, C. L. Smith, J. A. Burke, K. Leslie, M. J. Pereira, J. E. Bost, K. B. Kluivers, U. G. Nilsson, Y. Tanaka and A. Forbes Measurement of quality of recovery using the QoR-40: A quantitative systematic review British Journal of Anaesthesia
- 27 **SR** 260 2014 M. Luijten, M. W. J. Machielsen, D. J. Veltman, R. Hester, L. de Haan and I. H. A. Franken Systematic review of ERP and fMRI studies investigating inhibitory control and error processing in people with substance dependence and behavioural addictions Journal of Psychiatry and Neuroscience
- 28 **SR** 261 2014 C. C. Wu, C. H. Bai, M. T. Huang, C. H. Wu and K. W. Tam Local anesthetic infusion pump for pain management following open inguinal hernia repair: A meta-analysis International Journal of Surgery
- 30 **SR** 262 2014 K. Tsukamoto and K. Machida Effects of psychological stress on neutrophil phagocytosis and bactericidal activity in humans--a meta-analysis International Journal Of Psychophysiology: Official Journal Of The International Organization Of Psychophysiology
- 31 **SR** 263 2012 K. Clark and D. C. Currow Assessing constipation in palliative care within a gastroenterology framework Palliative Medicine
- 32 **SR** 264 2013 M. Boers Using literature to solve clinical problems Annals of the Rheumatic Diseases
- 33 **SR** 265 2012 C. P. de-Almeida, A. Wenzel, C. S. de-Carvalho, V. B. Powell, C. Arajo-Neto, L. C. Quarantini and I. R. de-Oliveira Amygdalar volume in borderline personality disorder with and without comorbid post-traumatic stress disorder: A meta-analysis CNS Spectrums
- 35 **SR** 266 2015 K. E. Boerner, K. A. Birnie, C. T. Chambers, A. Taddio, C. M. McMurtry, M. Noel, V. Shah and R. Pillai Riddell Simple Psychological Interventions for Reducing Pain From Common Needle Procedures in Adults: Systematic Review of Randomized and Quasi-Randomized Controlled Trials The Clinical Journal Of Pain
- 36 **SR** 267 2011 K. C. Jeon, L. S. Chen and P. Goodson Decision to abort after a prenatal diagnosis of sex chromosome abnormality: A systematic review of the literature Genetics in Medicine



|    |    |     |                                                                                                                                                                                                                                                                                                                                                                                                    |
|----|----|-----|----------------------------------------------------------------------------------------------------------------------------------------------------------------------------------------------------------------------------------------------------------------------------------------------------------------------------------------------------------------------------------------------------|
| 1  |    |     |                                                                                                                                                                                                                                                                                                                                                                                                    |
| 2  |    |     |                                                                                                                                                                                                                                                                                                                                                                                                    |
| 3  | SR | 268 | 2015 A. Muth, O. Ragnarsson, G. Johannsson and B. Wångberg Systematic review of surgery and outcomes in patients with primary aldosteronism The British journal of surgery                                                                                                                                                                                                                         |
| 4  | SR | 269 | 2015 X.-F. Pan, U. K. Griffiths, M. Pennington, H. Yu and M. Jit Systematic review of economic evaluations of vaccination programs in mainland China: Are they sufficient to inform decision making? Vaccine                                                                                                                                                                                       |
| 5  | SR | 270 | 2012 X. Zeng, P. Dong and X. Xie Disease burden of rheumatoid arthritis in mainland China: A systematic review and meta-analysis Value in Health                                                                                                                                                                                                                                                   |
| 6  | SR | 271 | 2015 V. Sharma, S. V. Deo, S. E. Altarabsheh, Y. H. Cho, P. J. Erwin and S. J. Park Comparison of the early haemodynamics of stented pericardial and porcine aortic valves European Journal Of Cardio-Thoracic Surgery: Official Journal Of The European Association For Cardio-Thoracic Surgery                                                                                                   |
| 7  | SR | 272 | 2014 Y. Liu, D. L. Lv, J. J. Duan, S. L. Xu, J. F. Zhang, X. J. Yang, X. Zhang, Y. H. Cui, X. W. Bian and S. C. Yu ALDH1A1 expression correlates with clinicopathologic features and poor prognosis of breast cancer patients: A systematic review and meta-analysis BMC Cancer                                                                                                                    |
| 8  | SR | 273 | 2014 S. Capolongo, M. Buffoli, A. Oppio and M. G. Petronio [Sustainability and hygiene of building: future perspectives] Epidemiologia E Prevenzione                                                                                                                                                                                                                                               |
| 9  | SR | 274 | 2015 S. F. Ahsan and Y. Wang In response to "systematic review and meta-analysis of Meniett therapy for Meniere's disease" Laryngoscope                                                                                                                                                                                                                                                            |
| 10 | SR | 275 | 2015 L. C. Moraes, M. V. R. SÁ, T. d. S. Dal Pizzol, M. B. C. Ferreira and F. Montagner Distribution of genes related to antimicrobial resistance in different oral environments: a systematic review Journal Of Endodontics                                                                                                                                                                       |
| 11 | SR | 276 | 2015 J. M. McMahon, E. M. Volpe, K. Klostermann, N. Trabold and Y. Xue A systematic review of the psychometric properties of the Sexual Relationship Power Scale in HIV/AIDS research Archives Of Sexual Behavior                                                                                                                                                                                  |
| 12 | SR | 277 | 2015 D. Bennabi, B. Aouizerate, W. El-Hage, O. Doumy, F. Moliere, P. Courtet, I. Nieto, F. Bellivier, M. Bubrovsky, G. Vaiva, J. Holztman, T. Bougerol, R. Richieri, C. Lancon, V. Camus, G. Saba, F. Haesbaert, T. d'Amato, T. Charpeaud, P. M. Llorca, M. Leboyer and E. Haffen Risk factors for treatment resistance in unipolar depression: a systematic review Journal Of Affective Disorders |
| 13 | SR | 278 | 2014 A. Joshi and K. Trout The role of health information kiosks in diverse settings: a systematic review Health Information And Libraries Journal                                                                                                                                                                                                                                                 |
| 14 | SR | 279 | 2011 J.-Y. Li, Y.-F. Zhang, G. S. Smith, C.-J. Xue, Y.-N. Luo, W.-H. Chen, C. J. Skinner and J. Finkelstein Quality of reporting of randomized clinical trials in tai chi interventions-a systematic review Evidence-Based Complementary And Alternative Medicine: Ecam                                                                                                                            |
| 15 | SR | 280 | 2013 T. J. Wood, K. M. Quinn, F. Farrokhyar, B. Deheshi, T. Corbett and M. A. Ghert Local control of extra-abdominal desmoid tumors: Systematic review and meta-analysis Rare Tumors                                                                                                                                                                                                               |
| 16 | SR | 281 | 2012 L. Mounesan, M. Sepidarkish, H. Hosseini, A. Ahmadi, G. Ardalan, R. Kelishadi and R. Majdzadeh Policy brief on promoting physical activity among adolescents International Journal of Preventive Medicine                                                                                                                                                                                     |
| 17 | SR | 282 | 2014 M. Dulon, C. Peters, A. Schablon and A. Nienhaus MRSA carriage among healthcare workers in non-outbreak settings in Europe and the United States: A systematic review BMC Infectious Diseases                                                                                                                                                                                                 |
| 18 | SR | 283 | 2014 Z.-B. Xie, L. Ma, X.-B. Wang, T. Bai, J.-Z. Ye, J.-H. Zhong and L.-Q. Li Transarterial embolization with or without chemotherapy for advanced hepatocellular carcinoma: a systematic review Tumour Biology: The Journal Of The International Society For Oncodevelopmental Biology And Medicine                                                                                               |
| 19 | SR | 284 | 2015 H. X. Zhou, L. Lu, T. Chu, T. Wang, D. Cao, F. Li, G. Ning and S. Feng Skeletal cryptococcosis from 1977 to 2013 Frontiers in Microbiology                                                                                                                                                                                                                                                    |
| 20 | SR | 285 | 2015 H. Creemers, H. Grupstra, F. Nollet, L. H. van den Berg and A. Beelen Prognostic factors for the course of functional status of patients with ALS: a systematic review Journal of Neurology                                                                                                                                                                                                   |
| 21 | SR | 286 | 2013 B. Malchow, A. Hasan, P. Fusar-Poli, A. Schmitt, P. Falkai and T. Wobrock Cannabis abuse and brain morphology in schizophrenia: A review of the available evidence European Archives of Psychiatry and Clinical Neuroscience                                                                                                                                                                  |
| 22 | SR | 287 | 2015 S. H. Rahimtoola and G. Huang Treatment of obstructive thrombosed prosthetic heart valve Cardiology (Switzerland)                                                                                                                                                                                                                                                                             |
| 23 | SR | 288 | 2015 I. Wolz, A. B. Fagundo, J. Treasure and F. Fernández-Aranda The processing of food stimuli in abnormal eating: A systematic review of electrophysiology European Eating Disorders Review                                                                                                                                                                                                      |
| 24 | SR | 289 | 2014 L. Schinasi and M. E. Leon Non-hodgkin lymphoma and occupational exposure to agricultural pesticide chemical groups and active ingredients: A systematic review and meta-analysis International Journal of Environmental Research and Public Health                                                                                                                                           |
| 25 | SR | 290 | 2015 L. Baker, A. L. Beres and R. Baird A systematic review and meta-analysis of gastrostomy insertion techniques in children Journal of Pediatric Surgery                                                                                                                                                                                                                                         |
| 26 | SR | 291 | 2015 F. W. Abdallah, S. H. Halpern, K. Aoyama and R. Brull Will the real benefits of single-shot interscalene block please stand up? A systematic review and meta-analysis Anesthesia and Analgesia                                                                                                                                                                                                |
| 27 | SR | 292 | 2013 A. Bryden, B. Roberts, M. Petticrew and M. McKee A systematic review of the influence of community level social factors on alcohol use Health and Place                                                                                                                                                                                                                                       |
| 28 |    |     |                                                                                                                                                                                                                                                                                                                                                                                                    |
| 29 |    |     |                                                                                                                                                                                                                                                                                                                                                                                                    |
| 30 |    |     |                                                                                                                                                                                                                                                                                                                                                                                                    |
| 31 |    |     |                                                                                                                                                                                                                                                                                                                                                                                                    |
| 32 |    |     |                                                                                                                                                                                                                                                                                                                                                                                                    |
| 33 |    |     |                                                                                                                                                                                                                                                                                                                                                                                                    |
| 34 |    |     |                                                                                                                                                                                                                                                                                                                                                                                                    |
| 35 |    |     |                                                                                                                                                                                                                                                                                                                                                                                                    |
| 36 |    |     |                                                                                                                                                                                                                                                                                                                                                                                                    |
| 37 |    |     |                                                                                                                                                                                                                                                                                                                                                                                                    |
| 38 |    |     |                                                                                                                                                                                                                                                                                                                                                                                                    |
| 39 |    |     |                                                                                                                                                                                                                                                                                                                                                                                                    |
| 40 |    |     |                                                                                                                                                                                                                                                                                                                                                                                                    |
| 41 |    |     |                                                                                                                                                                                                                                                                                                                                                                                                    |
| 42 |    |     |                                                                                                                                                                                                                                                                                                                                                                                                    |
| 43 |    |     |                                                                                                                                                                                                                                                                                                                                                                                                    |
| 44 |    |     |                                                                                                                                                                                                                                                                                                                                                                                                    |
| 45 |    |     |                                                                                                                                                                                                                                                                                                                                                                                                    |
| 46 |    |     |                                                                                                                                                                                                                                                                                                                                                                                                    |

- 1  
2  
3 **SR** 293 2013 R. Zwiers, J. I. Wiegerinck, C. D. Murawski, N. A. Smyth, J. G. Kennedy and C. N. Van Dijk Surgical treatment for posterior ankle impingement Arthroscopy -  
Journal of Arthroscopic and Related Surgery
- 4 **SR** 294 2012 F. J. Van Der Meer, E. Velthorst, C. J. Meijer, M. W. Machielsen, P. Fusar-Poli and L. De Haan Cannabis use in patients at clinical high risk of psychosis: Impact  
on prodromal symptoms and transition to psychosis-a systematic review Schizophrenia Research
- 5 **SR** 295 2015 R. Zhang, Y. Xu, S. Yang, H. Liang, Y. Zhang and Y. Liu OnabotulinumtoxinA for neurogenic detrusor overactivity and dose differences: a systematic review  
International braz j urol : official journal of the Brazilian Society of Urology
- 6 **RR** 296 2013 K. Kiezebrink, J. Coyle, P. Hoddinott, M. Witham, A. Clarke and A. Avenell Ways to intervene and support engagement of older adults weight loss study (wise  
owls) a mixed methods project developing an intervention Annals of Nutrition and Metabolism
- 7 **RR** 297 2014 K. H. Chaiyachati, O. Ogbuaji, M. Price, A. B. Suthar, E. K. Negussie and T. Bärnighausen Interventions to improve adherence to antiretroviral therapy: a rapid  
systematic review AIDS (London, England)
- 8 **RR** 298 2013 J. Franek Challenges of developing rapid guidance for complex interventions BMJ Quality and Safety
- 9 **RR** 299 2013 S. M. Dennis, M. Harris, J. Lloyd, G. Powell Davies, N. Faruqi and N. Zwar Do people with existing chronic conditions benefit from telephone coaching? A rapid  
review Australian Health Review: A Publication Of The Australian Hospital Association
- 10 **RR** 300 2012 Z. Hildon, J. Neuburger, D. Allwood, J. van der Meulen and N. Black Clinicians' and patients' views of metrics of change derived from patient reported outcome  
measures (PROMs) for comparing providers' performance of surgery BMC Health Services Research
- 11 **RR** 301 2013 I. A. Elliott and A. R. Beech A U.K. Cost-Benefit Analysis of Circles of Support and Accountability Interventions Sexual Abuse: Journal of Research and  
Treatment
- 12 **RR** 302 2013 N. Jarrett, I. Scott, J. Addington-Hall, Z. Amir, S. Brearley, L. Hodges, A. Richardson, M. Sharpe, Z. Stamataki, D. Stark, C. Siller, L. Ziegler and C. Foster  
Informing future research priorities into the psychological and social problems faced by cancer survivors: a rapid review and synthesis of the literature European  
Journal Of Oncology Nursing: The Official Journal Of European Oncology Nursing Society
- 13 **RR** 303 2015 T. Varker, D. Forbes, L. Dell, A. Weston, T. Merlin, S. Hodson and M. O'Donnell Rapid evidence assessment: increasing the transparency of an emerging  
methodology Journal Of Evaluation In Clinical Practice
- 14 **RR** 304 2012 S. Khangura, K. Konnyu, R. Cushman, J. Grimshaw and D. Moher Evidence summaries: The evolution of a rapid review approach Systematic Reviews
- 15 **RR** 305 2015 S. Jain, C. Boyd, L. Fiorentino, R. Khorsan and C. Crawford Are there efficacious treatments for treating the fatigue-sleep disturbance-depression  
symptom cluster in breast cancer patients? A Rapid Evidence Assessment of the Literature (REAL©) Breast Cancer: Targets and Therapy
- 16 **RR** 306 2015 F. Feys and D. Devroey Dapoxetine for premature ejaculation: A rapid evidence assessment Journal of Sexual Medicine
- 17 **RR** 307 2011 A. Sutton and M. J. Grant Cost-effective ways of delivering enquiry services: a rapid review Health Information And Libraries Journal
- 18 **RR** 308 2013 S. Jain, L. Fiorentino, C. Lee, C. Crawford, R. Khorsan and W. Jonas A rapid evidence assessment (real©) of the literature: Are there efficacious treatments for  
treating the fatigue-sleep disturbance-depression symptom cluster in breast cancer patients? Psycho-Oncology
- 19 **RR** 309 2014 A. Manayi and S. Saeidnia A concern on phthalate pollution of herbal extracts/medicines and detection methods Research Journal of Pharmacognosy
- 20 **RR** 310 2012 N. Boycott, J. Schneider and M. McMurrin Additional interventions to enhance the effectiveness of individual placement and support: a rapid evidence  
assessment Rehabilitation Research And Practice
- 21 **RR** 311 2011 S. B. N. Tavares, N. L. Alves de Sousa, E. J. C. Manrique, Z. B. Pinheiro de Albuquerque, L. C. Zeferino and R. G. Amaral Improvement in the routine screening  
of cervical smears: A study using rapid prescreening and 100% rapid review as internal quality control methods Cancer Cytopathology
- 22 **RR** 312 2014 R. Khorsan, C. Crawford, J. A. Ives, A. R. Walter and W. B. Jonas The effect of omega-3 fatty acids on biomarkers of inflammation: a rapid evidence  
assessment of the literature Military Medicine
- 23 **RR** 313 2014 B. Thomas, J. Potter, G. Sacks and J. Webster Evaluation of national food reformulation initiatives: A proposed evaluation tool Global Heart
- 24 **RR** 314 2012 C. Lee, C. Crawford, D. Wallerstedt, A. York, A. Duncan, J. Smith, M. Sprengel, R. Welton and W. Jonas The effectiveness of acupuncture research across  
components of the trauma spectrum response (tsr): A systematic review of reviews Systematic Reviews
- 25 **RR** 315 2012 D. McDaid and A. Park Investing in integrative medicine for mental health and wellbeing: Making the economic case BMC Complementary and Alternative  
Medicine
- 26 **RR** 316 2012 S. Kim, B. Wang, J. Lee, B. Kim, H. La, Y. M. Park and I. Choi Statistical analysis system of spontaneous adverse drug reaction reports Journal of Korean  
Society for Clinical Pharmacology and Therapeutics



|    |    |     |                                                                                                                                                                                                                                                                                                                                                                                                                                                  |
|----|----|-----|--------------------------------------------------------------------------------------------------------------------------------------------------------------------------------------------------------------------------------------------------------------------------------------------------------------------------------------------------------------------------------------------------------------------------------------------------|
| 1  |    |     |                                                                                                                                                                                                                                                                                                                                                                                                                                                  |
| 2  |    |     |                                                                                                                                                                                                                                                                                                                                                                                                                                                  |
| 3  | RR | 317 | 2012 J. J. Shin, R. M. Rosenfeld, S. R. Schwartz, R. B. Mitchell and D. G. Weinberger Rapid review: The guidelines in pediatric otolaryngology Otolaryngology - Head and Neck Surgery (United States)                                                                                                                                                                                                                                            |
| 4  |    |     |                                                                                                                                                                                                                                                                                                                                                                                                                                                  |
| 5  | RR | 318 | 2014 E. M. J. M. van den Broek, H. J. van der Zaag-Loonen and T. D. Buintjes Systematic Review: Efficacy of Gufoni Maneuver for Treatment of Lateral Canal Benign Paroxysmal Positional Vertigo with Geotropic Nystagmus Otolaryngology--Head And Neck Surgery: Official Journal Of American Academy Of Otolaryngology-Head And Neck Surgery                                                                                                     |
| 6  |    |     |                                                                                                                                                                                                                                                                                                                                                                                                                                                  |
| 7  | RR | 319 | 2015 P. Reynolds Gap analysis of animal hemorrhagic shock models through rapid evidence assessment strategies Shock                                                                                                                                                                                                                                                                                                                              |
| 8  | RR | 320 | 2014 R. Macaulay What the english could learn from the Irish: Making the nice approval process more cost-effective Value in Health                                                                                                                                                                                                                                                                                                               |
| 9  |    |     |                                                                                                                                                                                                                                                                                                                                                                                                                                                  |
| 10 | RR | 321 | 2012 M. Sadlier and M. Murphy Do standardized referral forms improve the quality of general practitioner referral letters to pigmented lesion clinics? A pilot study British Journal of Dermatology                                                                                                                                                                                                                                              |
| 11 | RR | 322 | 2015 M. Lui, C. A. Jones and M. D. Westby Effect of non-surgical, non-pharmacological weight loss interventions in patients who are obese prior to hip and knee arthroplasty surgery: a rapid review Systematic Reviews                                                                                                                                                                                                                          |
| 12 | RR | 323 | 2014 P. J. Wiffen, S. Derry and R. A. Moore Impact of morphine, fentanyl, oxycodone or codeine on patient consciousness, appetite and thirst when used to treat cancer pain The Cochrane Database Of Systematic Reviews                                                                                                                                                                                                                          |
| 13 | RR | 324 | 2011 R. Moran and P. Davidson An uneven spread: a review of public involvement in the National Institute of Health Research's Health Technology Assessment program International Journal Of Technology Assessment In Health Care                                                                                                                                                                                                                 |
| 14 | RR | 325 | 2011 S. Ryu, J. James, P. Gerszten, F. Yin, R. Timmerman, Y. Hitchcock, B. Movsas, A. Kanner, L. Berk and L. Kachnic RTOG 0631 Phase II/III study of image-guided stereotactic radiosurgery for localized spine metastases: Phase II results International Journal of Radiation Oncology Biology Physics                                                                                                                                         |
| 15 | RR | 326 | 2013 L. Marks, H. Weatherly and A. Mason Prioritizing investment in public health and health equity: what can commissioners do? Public Health                                                                                                                                                                                                                                                                                                    |
| 16 | RR | 327 | 2013 M. Koster, C. Garrity, C. Gallagher, H. Schunemann and S. Norris The role of rapid systematic reviews for development of rapid guidance in health care and health policy settings BMJ Quality and Safety                                                                                                                                                                                                                                    |
| 17 | RR | 328 | 2015 C. W. Halladay, T. A. Trikalinos, I. T. Schmid, C. H. Schmid and I. J. Dahabreh Using data sources beyond PubMed has a modest impact on the results of systematic reviews of therapeutic interventions Journal of Clinical Epidemiology                                                                                                                                                                                                     |
| 18 | RR | 329 | 2013 E. W. Klee, E. Winter and M. J. Ferber Bioinformatics decision support for interpretation of clinical NGS variants Journal of Molecular Diagnostics                                                                                                                                                                                                                                                                                         |
| 19 | RR | 330 | 2014 S. W. Kirkland, M. Bullard, S. Couperthwaite and B. H. Rowe Establishing a standardized process of gathering evidence-based information to support clinical knowledge development Canadian Journal of Emergency Medicine                                                                                                                                                                                                                    |
| 20 | RR | 331 | 2014 S. Ryu, S. L. Pugh, P. C. Gerszten, F.-F. Yin, R. D. Timmerman, Y. J. Hitchcock, B. Movsas, A. A. Kanner, L. B. Berk, D. S. Followill and L. A. Kachnic RTOG 0631 phase 2/3 study of image guided stereotactic radiosurgery for localized (1-3) spine metastases: phase 2 results Practical Radiation Oncology                                                                                                                              |
| 21 | RR | 332 | 2014 Z. X. Yang, J. T. Shen, Y. P. Li, K. Zhao, C. H. Shi, Y. Xiao, J. J. Yu, W. D. Guo, C. C. Li, Y. Q. Wang and X. L. Li Helical tomotherapy for cancer treatment: a rapid health technology assessment Journal Of Evidence-Based Medicine                                                                                                                                                                                                     |
| 22 | RR | 333 | 2015 R. J. M. de Bruin, R. Hage, H. van der Zaag-Loonen and P. P. G. van Benthem Rapid review: sinonasal surgery vs. medical therapy for asthma in patients with chronic rhinosinusitis with or without nasal polyps European Archives Of Oto-Rhino-Laryngology: Official Journal Of The European Federation Of Oto-Rhino-Laryngological Societies (EUFOS): Affiliated With The German Society For Oto-Rhino-Laryngology - Head And Neck Surgery |
| 23 | RR | 334 | 2013 H. L. Neville-Webbe, J. E. Carsar, H. Wong, J. Andrews, T. Poulter, R. Smith and E. Marshall The impact of a new acute oncology service in acute hospitals: Experience from the Clatterbridge Cancer Centre and Merseyside and Cheshire Cancer Network Clinical Medicine, Journal of the Royal College of Physicians of London                                                                                                              |
| 24 | RR | 335 | 2012 G. Lombardi, F. Zustovich, P. Farina, V. Polo, M. Farina, A. D. Puppa, R. Bertorelle, M. P. Gardiman, F. Berti and V. Zagonel Cilengitide in bevacizumab-refractory high-grade glioma: two case reports and critical review of the literature Anti-Cancer Drugs                                                                                                                                                                             |
| 25 | RR | 336 | 2015 A. Petrosino, P. Campie, J. Pace, T. Fronius, S. Guckenburg, M. Wiatrowski and L. Rivera Cross-sector, multi-agency interventions to address urban youth firearms violence: A Rapid Evidence Assessment Aggression and Violent Behavior                                                                                                                                                                                                     |
| 26 | RR | 337 | 2012 M. G. Freitas, K. M. Souza, M. T. Silva and F. T. S. Elias Bariatric surgery from the perspective of brazilian national health system (sus) Value in Health                                                                                                                                                                                                                                                                                 |
| 27 | RR | 338 | 2011 P. Coleman and J. Turner Patient priorities and decision-making about using 999 EMS? A review of the literature Emergency Medicine Journal                                                                                                                                                                                                                                                                                                  |
| 28 | RR | 339 | 2015 G. Davidson, B. Kelly, G. Macdonald, M. Rizzo, L. Lombard, O. Abogunrin, V. Cliff-Matthews and A. Martin Supported decision making: a review of the international literature International Journal Of Law And Psychiatry                                                                                                                                                                                                                    |
| 29 |    |     |                                                                                                                                                                                                                                                                                                                                                                                                                                                  |
| 30 |    |     |                                                                                                                                                                                                                                                                                                                                                                                                                                                  |
| 31 |    |     |                                                                                                                                                                                                                                                                                                                                                                                                                                                  |
| 32 |    |     |                                                                                                                                                                                                                                                                                                                                                                                                                                                  |
| 33 |    |     |                                                                                                                                                                                                                                                                                                                                                                                                                                                  |
| 34 |    |     |                                                                                                                                                                                                                                                                                                                                                                                                                                                  |
| 35 |    |     |                                                                                                                                                                                                                                                                                                                                                                                                                                                  |
| 36 |    |     |                                                                                                                                                                                                                                                                                                                                                                                                                                                  |
| 37 |    |     |                                                                                                                                                                                                                                                                                                                                                                                                                                                  |
| 38 |    |     |                                                                                                                                                                                                                                                                                                                                                                                                                                                  |
| 39 |    |     |                                                                                                                                                                                                                                                                                                                                                                                                                                                  |
| 40 |    |     |                                                                                                                                                                                                                                                                                                                                                                                                                                                  |
| 41 |    |     |                                                                                                                                                                                                                                                                                                                                                                                                                                                  |
| 42 |    |     |                                                                                                                                                                                                                                                                                                                                                                                                                                                  |
| 43 |    |     |                                                                                                                                                                                                                                                                                                                                                                                                                                                  |
| 44 |    |     |                                                                                                                                                                                                                                                                                                                                                                                                                                                  |
| 45 |    |     |                                                                                                                                                                                                                                                                                                                                                                                                                                                  |
| 46 |    |     |                                                                                                                                                                                                                                                                                                                                                                                                                                                  |

- 1  
2  
3 2015 L. Hartling, J.-M. Guise, E. Kato, J. Anderson, N. Aronson, S. Belinson, E. Berliner, D. Dryden, R. Featherstone, M. Foisy, M. Mitchell, M. Motu'apuaka, H.  
4 **RR** 340 Noorani, R. Paynter, K. A. Robinson, K. Schoelles, C. A. Umscheid and E. Whitlock EPC Methods: An Exploration of Methods and Context for the Production of Rapid  
5 **RR** 341 2013 V. S. Talaulikar and S. Arulkumaran Medico-legal issues with CTG interpretation *Current Women's Health Reviews*  
6 **RR** 342 2012 R. Yadav, A. K. Shah, J. A. Loeb, M. N. S. Swamy and R. Agarwal Morphology-based automatic seizure detector for intracerebral EEG recordings *IEEE*  
7 **RR** 343 2014 C. Crawford, C. Lee, D. Freilich, C. C. Buckenmaier, P. Crawford, R. Delgado, D. Freilich, A. Hickey, W. B. Jonas, T. May, R. P. Petri, E. B. Schoemaker, C.  
8 **RR** 344 Spevak, S. Swann and A. York Effectiveness of active self-care complementary and integrative medicine therapies: Options for the management of chronic pain  
9 **RR** 345 2015 E. Toomey, L. Currie-Murphy, J. Matthews and D. A. Hurley Implementation fidelity of physiotherapist-delivered group education and exercise interventions to  
10 **RR** 346 2014 C. J. Treanor and M. Donnelly The late effects of cancer and cancer treatment: a rapid review *The Journal Of Community And Supportive Oncology*  
11 **RR** 347 2014 C. Miani, S. Ball, E. Pitchforth, J. Exley, S. King, M. Roland, J. Fuld and E. Nolte Organisational interventions to reduce length of stay in hospital: a rapid  
12 **RR** 348 2013 C. Kilpatrick, H. Murdoch and A. Paterson The rapid delivery of national evidence based recommendations for HAI care bundles *Antimicrobial Resistance and*  
13 **RR** 349 2015 S. Attipoe, S. A. Zeno, C. Lee, C. Crawford, R. Khorsan, A. R. Walter and P. A. Deuster Tyrosine for Mitigating Stress and Enhancing Performance in Healthy  
14 **RR** 350 2014 C. Lee, C. Crawford, C. Buckenmaier, E. Schoemaker, R. Delgado and A. York Active, self-care complementary and integrative medicine therapies for the  
15 **RR** 351 2015 S. A. Nancarrow, A. Roots, S. Grace and V. Saberi Models of care involving district hospitals: a rapid review to inform the Australian rural and remote context  
16 **RR** 352 2013 H. Bungay and T. Vella-Burrows The effects of participating in creative activities on the health and well-being of children and young people: a rapid review of the  
17 **RR** 353 2015 J. Polisen, C. Garrity, C. Kamel, A. Stevens and A. M. Abou-Setta Rapid review programs to support health care and policy decision making: a descriptive  
18 **RR** 354 2011 D. Fitzpatrick-Lewis, R. Ganann, S. Krishnaratne, D. Ciliska, F. Kouyoumdjian and S. W. Hwang Effectiveness of interventions to improve the health and housing  
19 **RR** 355 2015 Z. Belshaw, L. Asher, N. D. Harvey and R. S. Dean Quality of life assessment in domestic dogs: An evidence-based rapid review *Veterinary Journal (London,*  
20 **RR** 356 2015 A. C. Tricco, W. Zarin, J. Antony, B. Hutton, D. Moher, D. Sherifali and S. E. Straus An international survey and modified Delphi approach revealed numerous  
21 **RR** 357 2012 M. Mobinizadeh, A. Oliyaeemanesh, S. Doaee, M. Nejati, P. Aboee, M. Azadbakht and M. Valadkhani Health technology assessment of infliximab: A rapid  
22 **RR** 358 2011 A. York, C. Crawford, A. Walter, J. A. G. Walter, W. B. Jonas and R. Coeytaux Acupuncture research in military and veteran populations: A rapid evidence  
23 **RR** 359 2015 J.-Q. Cai, K. Chen, Y.-P. Mou, Y. Pan, X.-W. Xu, Y.-C. Zhou and C.-J. Huang Laparoscopic versus open wedge resection for gastrointestinal stromal tumors of  
24 **RR** 360 2011 M. Visnansky and S. Mesaros Patient self-testing of oral anticoagulation therapy by coaguChek® xs system. Rapid health technology assessment in Slovak  
25 **RR** 361 2013 R. M. Turner, S. M. Bird and J. P. T. Higgins The impact of study size on meta-analyses: examination of underpowered studies in Cochrane reviews *Plos One*  
26 **RR** 362 2015 M. Hersi, A. Stevens, P. Quach, C. Hamel, K. Thavorn, C. Garrity, B. Skidmore, C. Vallen, S. L. Norris, M. Egger, S. Eremin, M. Ferri, N. Shindo and D.  
27 **RR** 363 2013 S. Doaee, M. Mobinizadeh and A. Oliyaeemanesh Rapid health technology assessment in rehabilitation hospital: Review article *Journal of Isfahan Medical*  
28 **RR** 363 2014 S. T. Chao, T. Meier, A. Godley, B. Hugebeck, M. Kolar, P. Barrett, C. A. Reddy and J. H. Suh One-year experience with the workflow enhancement (we) team:  
29 Does continuous improvement have to be continuous? *International Journal of Radiation Oncology Biology Physics*

|    |    |     |                                                                                                                                                                                                                                                                                                                                                                  |
|----|----|-----|------------------------------------------------------------------------------------------------------------------------------------------------------------------------------------------------------------------------------------------------------------------------------------------------------------------------------------------------------------------|
| 1  |    |     |                                                                                                                                                                                                                                                                                                                                                                  |
| 2  |    |     |                                                                                                                                                                                                                                                                                                                                                                  |
| 3  | RR | 364 | 2011 B. J. Kelly, D. A. Perkins, J. D. Fuller and S. M. Parker Shared care in mental illness: A rapid review to inform implementation International Journal Of Mental Health Systems                                                                                                                                                                             |
| 4  |    |     |                                                                                                                                                                                                                                                                                                                                                                  |
| 5  | RR | 365 | 2014 C. Lee, C. Crawford, L. Teo and C. Spevak An analysis of the various chronic pain conditions captured in a systematic review of active self-care complementary and integrative medicine therapies for the management of chronic pain symptoms Pain Medicine (Malden, Mass.)                                                                                 |
| 6  | RR | 366 | 2015 J. A. Hayden, L. Killian, A. Zygmunt, J. Babineau, R. Martin-Misener, J. L. Jensen and A. J. Carter Methods of a multi-faceted rapid knowledge synthesis project to inform the implementation of a new health service model: Collaborative Emergency Centres Systematic Reviews                                                                             |
| 7  |    |     |                                                                                                                                                                                                                                                                                                                                                                  |
| 8  | RR | 367 | 2015 E. Toomey, L. Currie-Murphy, J. Matthews and D. A. Hurley The effectiveness of physiotherapist-delivered group education and exercise interventions to promote self-management for people with osteoarthritis and chronic low back pain: a rapid review part I Manual Therapy                                                                               |
| 9  | RR | 368 | 2014 Y. Tse and H. Charters Rapid response to safety incidences in a children's hospital-reconstructing a system fit for the Francis report era Archives of Disease in Childhood                                                                                                                                                                                 |
| 10 |    |     |                                                                                                                                                                                                                                                                                                                                                                  |
| 11 | RR | 369 | 2011 M. McMurrin Individual-level interventions for alcohol-related violence: A rapid evidence assessment Criminal Behaviour and Mental Health                                                                                                                                                                                                                   |
| 12 | RR | 370 | 2015 A. Twycross, R. Parker, A. Williams and F. Gibson Cancer-Related Pain and Pain Management: Sources, Prevalence, and the Experiences of Children and Parents Journal Of Pediatric Oncology Nursing: Official Journal Of The Association Of Pediatric Oncology Nurses                                                                                         |
| 13 |    |     |                                                                                                                                                                                                                                                                                                                                                                  |
| 14 | RR | 371 | 2011 G. Vujanic, B. Sandstedt, I. Leuschner and B. Sznajder Central pathology review in multicentre tumour trials-do we really need it? Pediatric Blood and Cancer                                                                                                                                                                                               |
| 15 | RR | 372 | 2013 S. Mahon, S. Redmond and P. Carney Transparency of the medicines reimbursement system in Ireland: A quantitative analysis of the influences on reimbursement decisions [2006-2013] Value in Health                                                                                                                                                          |
| 16 |    |     |                                                                                                                                                                                                                                                                                                                                                                  |
| 17 | RR | 373 | 2014 Treatments for Constipation: A Review of Systematic Reviews                                                                                                                                                                                                                                                                                                 |
| 18 | RR | 374 | 2015 R. M. Featherstone, D. M. Dryden, M. Foisy, J.-M. Guise, M. D. Mitchell, R. A. Paynter, K. A. Robinson, C. A. Umscheid and L. Hartling Advancing knowledge of rapid reviews: an analysis of results, conclusions and recommendations from published review articles examining rapid reviews Systematic Reviews                                              |
| 19 |    |     |                                                                                                                                                                                                                                                                                                                                                                  |
| 20 | RR | 375 | 2015 Y. Geng, C. S. Fowler and S. Fulton Clinical librarian support for rapid review of clinical utility of cancer molecular biomarkers Medical Reference Services Quarterly                                                                                                                                                                                     |
| 21 | RR | 376 | 2012 J. C. Beani PSolar protection products: Efficacy and risks Annales de Dermatologie et de Venereologie                                                                                                                                                                                                                                                       |
| 22 | RR | 377 | 2015 K. Moeller-Saxone, E. Davis and H. Herrman Promoting mental health in Asia-Pacific: Systematic review focusing on Thailand and China Asia-Pacific Psychiatry: Official Journal Of The Pacific Rim College Of Psychiatrists                                                                                                                                  |
| 23 |    |     |                                                                                                                                                                                                                                                                                                                                                                  |
| 24 | RR | 378 | 2014 H. Ju and K. Hewson Health technology assessment and evidence-based policy making: Queensland Department of Health experience International Journal Of Technology Assessment In Health Care                                                                                                                                                                 |
| 25 |    |     |                                                                                                                                                                                                                                                                                                                                                                  |
| 26 | RR | 379 | 2011 E. J. C. Manrique, N. L. A. Souza, S. B. N. Tavares, Z. B. P. Albuquerque, L. C. Zeferino and R. G. Amaral Analysis of the performance of 100% rapid review using an average time of 1 and 2 minutes according to the quality of cervical cytology specimens Cytopathology: Official Journal Of The British Society For Clinical Cytology                   |
| 27 |    |     |                                                                                                                                                                                                                                                                                                                                                                  |
| 28 | RR | 380 | 2015 P. Bragge, L. Piccenna, J. W. Middleton, S. Williams, G. Creasey, S. Dunlop, D. Brown and R. L. Gruen Developing a spinal cord injury research strategy using a structured process of evidence review and stakeholder dialogue. Part I: rapid review of SCI prioritisation literature Spinal Cord                                                           |
| 29 | RR | 381 | 2014 C. Lee, C. Crawford and A. Hickey Mind-body therapies for the self-management of chronic pain symptoms Pain Medicine (Malden, Mass.)                                                                                                                                                                                                                        |
| 30 |    |     |                                                                                                                                                                                                                                                                                                                                                                  |
| 31 | RR | 382 | 2014 T. Luckett, J. Phillips, M. Agar, C. Virdun, A. Green and P. M. Davidson Elements of effective palliative care models: a rapid review BMC Health Services Research                                                                                                                                                                                          |
| 32 | RR | 383 | 2011 S. Van De Velde, E. De Buck, T. Dieltjens and B. Aertgeerts Medicinal use of potato-derived products: Conclusions of a rapid versus full systematic review Phytotherapy Research                                                                                                                                                                            |
| 33 |    |     |                                                                                                                                                                                                                                                                                                                                                                  |
| 34 | RR | 384 | 2015 T. Szmuda, P. Sloniewski, P. M. Waszak, J. Springer and M. Szmuda Towards a new treatment paradigm for ruptured blood blister-like aneurysms of the internal carotid artery? A rapid systematic review Journal Of Neurointerventional Surgery                                                                                                               |
| 35 | RR | 385 | 2013 T. Heard, A. Chandra, G. Culora, S. S. Gupta, A. Herbert and M. Morgan Use of the ThinPrep Imaging System for internal quality control of cervical cytology Cytopathology: Official Journal Of The British Society For Clinical Cytology                                                                                                                    |
| 36 |    |     |                                                                                                                                                                                                                                                                                                                                                                  |
| 37 | RR | 386 | 2014 Q. Qi, G. Fang, Y. X. Chen, Y. Liu, C. L. Zhou, J. Wang, Z. Y. Qin, X. C. Chen, Y. L. Jing, Q. L. Ma, H. R. Zheng and Q. L. Liu Mass vaccination campaign of hepatitis a vaccine and measles-mumps-rubella live attenuated vaccine in children in stricken regions of 4.20 lushan earthquake in Sichuan Province Chinese Journal of Evidence-Based Medicine |
| 38 |    |     |                                                                                                                                                                                                                                                                                                                                                                  |
| 39 | RR | 387 | 2014 A. Migliore, T. Jefferson, M. Cerbo, I. Abraha and A. Montedori Implantable devices for the closure of patent foramen ovale in adults: an Italian rapid health technology assessment Expert Review Of Medical Devices                                                                                                                                       |
| 40 |    |     |                                                                                                                                                                                                                                                                                                                                                                  |
| 41 |    |     |                                                                                                                                                                                                                                                                                                                                                                  |
| 42 |    |     |                                                                                                                                                                                                                                                                                                                                                                  |
| 43 |    |     |                                                                                                                                                                                                                                                                                                                                                                  |
| 44 |    |     |                                                                                                                                                                                                                                                                                                                                                                  |
| 45 |    |     |                                                                                                                                                                                                                                                                                                                                                                  |
| 46 |    |     |                                                                                                                                                                                                                                                                                                                                                                  |

|    |    |     |                                                                                                                                                                                                                                                                                                                                                             |
|----|----|-----|-------------------------------------------------------------------------------------------------------------------------------------------------------------------------------------------------------------------------------------------------------------------------------------------------------------------------------------------------------------|
| 1  |    |     |                                                                                                                                                                                                                                                                                                                                                             |
| 2  |    |     |                                                                                                                                                                                                                                                                                                                                                             |
| 3  | RR | 388 | 2015 J. Polisen, C. Garrity, C. A. Umscheid, C. Kamel, K. Samra, J. Smith and A. Vosilla Rapid Review Summit: an overview and initiation of a research agenda Systematic Reviews                                                                                                                                                                            |
| 4  | RR | 389 | 2013 B. Lavery, S. Orton, H. Baker, J. Ross, R. Walsh, R. Stevens, N. Clarke, F. Fairman, K. Mitchell and A. Clements Transforming follow-up: Patients as true partners in a major multi-disciplinary change project European Journal of Cancer                                                                                                             |
| 5  | RR | 390 | 2013 S. Venugopal, J. Blundell, A. Raja Sri and G. Bennett Current management of iron deficiency in pregnancy at a district general hospital British Journal of Haematology                                                                                                                                                                                 |
| 6  | RR | 391 | 2015 J. T. Mattivi and B. Buchberger [Rapid Reviews: Sisyphos' Salvation? - An Inventory] Gesundheitswesen (Bundesverband Der Arzte Des Offentlichen Gesundheitsdienstes (Germany))                                                                                                                                                                         |
| 7  | RR | 392 | 2014 L. Wolfenden, J. Carruthers, R. Wyse and S. Yoong Translation of tobacco control programs in schools: findings from a rapid review of systematic reviews of implementation and dissemination interventions Health Promotion Journal Of Australia: Official Journal Of Australian Association Of Health Promotion Professionals                         |
| 8  | RR | 393 | 2014 E. S. van der Scheer-Horst, P. P. G. van Benthem, T. D. Bruintjes, R. B. van Leeuwen and H. J. van der Zaag-Loonen The efficacy of vestibular rehabilitation in patients with benign paroxysmal positional vertigo: a rapid review Otolaryngology--Head And Neck Surgery: Official Journal Of American Academy Of Otolaryngology-Head And Neck Surgery |
| 9  | RR | 394 | 2015 Antidepressants in Elderly Patients with Major and Minor Depression: A Review of Clinical Effectiveness and Guidelines                                                                                                                                                                                                                                 |
| 10 | RR | 395 | 2011 R. Yadav, A. K. Shah, J. A. Loeb, M. N. Swamy and R. Agarwal A novel unsupervised spike sorting algorithm for intracranial EEG Conference proceedings : ... Annual International Conference of the IEEE Engineering in Medicine and Biology Society. IEEE Engineering in Medicine and Biology Society. Conference                                      |
| 11 | RR | 396 | 2015 A. C. Tricco, J. Antony, W. Zarin, L. Strifler, M. Ghassemi, J. Ivory, L. Perrier, B. Hutton, D. Moher and S. E. Straus A scoping review of rapid review methods BMC Medicine                                                                                                                                                                          |
| 12 | RR | 397 | 2015 M. Golfam, R. Beall, J. Brehaut, S. Saeed, C. Relton, F. D. Ashbury and J. Little Comparing alternative design options for chronic disease prevention interventions European Journal Of Clinical Investigation                                                                                                                                         |
| 13 | RR | 398 | 2014 E. L. van der Veen, R. A. van Hulst and J. A. de Ru Hyperbaric Oxygen Therapy in Acute Acoustic Trauma: A Rapid Systematic Review Otolaryngology--Head And Neck Surgery: Official Journal Of American Academy Of Otolaryngology-Head And Neck Surgery                                                                                                  |
| 14 | RR | 399 | 2015 A. Vogus and K. Graff PEPFAR Transitions to Country Ownership: Review of Past Donor Transitions and Application of Lessons Learned to the Eastern Caribbean Global Health, Science And Practice                                                                                                                                                        |
| 15 | RR | 400 | 2014 Y. Liew, D. De Berker and J. Sansom Rapid clinical review of patients assessed by a teledermatology service: Analysis of pathways and outcomes British Journal of Dermatology                                                                                                                                                                          |
| 16 | RR | 401 | 2014 E. H. Hwang, M. Hwang, B. C. Shin and G. S. Lee Effect of Tai Chi as therapeutic exercise on blood pressure: Rapid systematic review Journal of Alternative and Complementary Medicine                                                                                                                                                                 |
| 17 | RR | 402 | 2014 A. Banbury, A. Roots and S. Nancarrow Rapid review of applications of e-health and remote monitoring for rural residents The Australian Journal Of Rural Health                                                                                                                                                                                        |
| 18 | RR | 403 | 2014 K. M. Souza and L. Goncalves HTA studies on orphan drugs by rebratsxmembers Value in Health                                                                                                                                                                                                                                                            |
| 19 | RR | 404 | 2014 C. Briand and M. Menear Implementing a continuum of evidence-based psychosocial interventions for people with severe mental illness: Part 2 - Review of critical implementation issues Canadian Journal of Psychiatry                                                                                                                                  |
| 20 | RR | 405 | 2014 Exploring the method and process of rapid review Chinese Journal of Evidence-Based Medicine                                                                                                                                                                                                                                                            |
| 21 | RR | 406 | 2015 S. Parker and J. Fuller Are nurses well placed as care co-ordinators in primary care and what is needed to develop their role: a rapid review? Health & Social Care In The Community                                                                                                                                                                   |
| 22 | RR | 407 | 2015 K. Ball, A. Carver, K. Downing, M. Jackson and K. O'Rourke Addressing the social determinants of inequities in physical activity and sedentary behaviours Health Promotion International                                                                                                                                                               |
| 23 | RR | 408 | 2013 R. A. Bavolek, C. D. Aubin and A. J. Kim Team-based learning: Electrocardiogram interpretation and application for emergency medicine residents Academic Emergency Medicine                                                                                                                                                                            |
| 24 | RR | 409 | 2013 A. Li, T. Giaddui, W. Chen, Y. Cui, S. McNulty, G. Freedman, J. Galvin, D. Arthur, F. Vicini and J. White An analysis of rapid review cases that failed to meet the RTOG 1005 contouring and dosevolume criteria International Journal of Radiation Oncology Biology Physics                                                                           |
| 25 | RR | 410 | 2014 F. G. Neville, C. A. Goodall, D. J. Williams and P. D. Donnelly Violence brief interventions: A rapid review Aggression and Violent Behavior                                                                                                                                                                                                           |
| 26 | RR | 411 | 2014 I. Wegner, M. E. F. Niesten, C. H. van Werkhoven and W. Grolman Rapid Systematic Review of the Epley Maneuver versus Vestibular Rehabilitation for Benign Paroxysmal Positional Vertigo Otolaryngology--Head And Neck Surgery: Official Journal Of American Academy Of Otolaryngology-Head And Neck Surgery                                            |
| 27 |    |     |                                                                                                                                                                                                                                                                                                                                                             |
| 28 |    |     |                                                                                                                                                                                                                                                                                                                                                             |
| 29 |    |     |                                                                                                                                                                                                                                                                                                                                                             |
| 30 |    |     |                                                                                                                                                                                                                                                                                                                                                             |
| 31 |    |     |                                                                                                                                                                                                                                                                                                                                                             |
| 32 |    |     |                                                                                                                                                                                                                                                                                                                                                             |
| 33 |    |     |                                                                                                                                                                                                                                                                                                                                                             |
| 34 |    |     |                                                                                                                                                                                                                                                                                                                                                             |
| 35 |    |     |                                                                                                                                                                                                                                                                                                                                                             |
| 36 |    |     |                                                                                                                                                                                                                                                                                                                                                             |
| 37 |    |     |                                                                                                                                                                                                                                                                                                                                                             |
| 38 |    |     |                                                                                                                                                                                                                                                                                                                                                             |
| 39 |    |     |                                                                                                                                                                                                                                                                                                                                                             |
| 40 |    |     |                                                                                                                                                                                                                                                                                                                                                             |
| 41 |    |     |                                                                                                                                                                                                                                                                                                                                                             |
| 42 |    |     |                                                                                                                                                                                                                                                                                                                                                             |
| 43 |    |     |                                                                                                                                                                                                                                                                                                                                                             |
| 44 |    |     |                                                                                                                                                                                                                                                                                                                                                             |
| 45 |    |     |                                                                                                                                                                                                                                                                                                                                                             |
| 46 |    |     |                                                                                                                                                                                                                                                                                                                                                             |

|    |       |     |                                                                                                                                                                                                                                                                                                                                                                                                    |
|----|-------|-----|----------------------------------------------------------------------------------------------------------------------------------------------------------------------------------------------------------------------------------------------------------------------------------------------------------------------------------------------------------------------------------------------------|
| 1  |       |     |                                                                                                                                                                                                                                                                                                                                                                                                    |
| 2  |       |     |                                                                                                                                                                                                                                                                                                                                                                                                    |
| 3  | RR    | 412 | 2013 J. Oh and P. A. Calabresi Emerging injectable therapies for multiple sclerosis <i>The Lancet. Neurology</i>                                                                                                                                                                                                                                                                                   |
| 4  | RR    | 413 | 2013 J. Phillips Palliative care systems: Evidence for key models of care elements <i>Asia-Pacific Journal of Clinical Oncology</i>                                                                                                                                                                                                                                                                |
| 5  | RR    | 414 | 2012 A. Hinchliffe Minor ailments schemes: A rapid review of the evidence <i>International Journal of Pharmacy Practice</i>                                                                                                                                                                                                                                                                        |
| 6  | RR    | 415 | 2014 H. P. Loveday, J. A. Wilson, K. Kerr, R. Pitchers, J. T. Walker and J. Browne Association between healthcare water systems and <i>Pseudomonas aeruginosa</i> infections: a rapid systematic review <i>The Journal Of Hospital Infection</i>                                                                                                                                                   |
| 7  | RR    | 416 | 2014 S. B. Do Nascimento Tavares, N. L. A. De Souza, E. J. C. Manrique, C. Z. S. Ázara, E. A. Da Silveira and R. G. Amaral Internal quality control for cervical cytopathology: Comparison of potential false-negatives detected at rapid prescreening and at 100% rapid review <i>Acta Cytologica</i>                                                                                             |
| 8  | RR    | 417 | 2012 K. J. Konnyu, E. Kwok, B. Skidmore and D. Moher The effectiveness and safety of emergency department short stay units: a rapid review <i>Open Medicine: A Peer-Reviewed, Independent, Open-Access Journal</i>                                                                                                                                                                                 |
| 9  | RR    | 418 | 2014 Gabapentin for Adults with Neuropathic Pain: A Review of the Clinical Evidence and Guidelines                                                                                                                                                                                                                                                                                                 |
| 10 | RR    | 419 | 2012 J. Harker and J. Kleijnen What is a rapid review? A methodological exploration of rapid reviews in Health Technology Assessments <i>International Journal Of Evidence-Based Healthcare</i>                                                                                                                                                                                                    |
| 11 | RR    | 420 | 2014 A. L. McCullough, J. C. Haycock, D. P. Forward and C. G. Moran Early management of the severely injured major trauma patient <i>British Journal Of Anaesthesia</i>                                                                                                                                                                                                                            |
| 12 | RR    | 421 | 2015 Z. Munn, C. Lockwood and S. Moola The Development and Use of Evidence Summaries for Point of Care Information Systems: A Streamlined Rapid Review Approach <i>Worldviews On Evidence-Based Nursing / Sigma Theta Tau International, Honor Society Of Nursing</i>                                                                                                                              |
| 13 | RR    | 422 | 2015 K. Fiscella, J. N. Tobin, J. K. Carroll, H. He and G. Ogedegbe Ethical oversight in quality improvement and quality improvement research: new approaches to promote a learning health care system <i>BMC Medical Ethics</i>                                                                                                                                                                   |
| 14 | RR    | 423 | 2014 C. Davis and J. Tomas Care of the dying: how do we replace the Liverpool Care Pathway? <i>British Medical Bulletin</i>                                                                                                                                                                                                                                                                        |
| 15 | RR    | 424 | 2012 L. Blank, J. Coster, A. O' Cathain, E. Knowles, J. Tosh, J. Turner and J. Nicholl The appropriateness of, and compliance with, telephone triage decisions: a systematic review and narrative synthesis <i>Journal Of Advanced Nursing</i>                                                                                                                                                     |
| 16 | RR    | 425 | 2011 H. C. Oh and W. H. Ng Rapid health technology assessment-intrathecal baclofen pump therapy for intractable spasticity <i>Proceedings of Singapore Healthcare</i>                                                                                                                                                                                                                              |
| 17 | RR    | 426 | 2014 V. M. Drennan, M. Halter, S. Brearley, W. Carneiro, J. Gabe, H. Gage, R. Grant, L. Joly and S. de Lusignan Investigating the contribution of physician assistants to primary care in England: a mixed-methods study                                                                                                                                                                           |
| 18 | RR    | 427 | 2012 B. Dangott and M. Salama Automated image analysis and scoring of tartrate resistance acid phosphatase preparations <i>Laboratory Investigation</i>                                                                                                                                                                                                                                            |
| 19 | RR    | 428 | 2014 S. Hinrichs, D. Jahagirdar, C. Miani, B. Guerin and E. Nolte Learning for the NHS on procurement and supply chain management: a rapid evidence assessment                                                                                                                                                                                                                                     |
| 20 | RR    | 429 | 2011 S. G. Brearley, Z. Stamataki, J. Addington-Hall, C. Foster, L. Hodges, N. Jarrett, A. Richardson, I. Scott, M. Sharpe, D. Stark, C. Siller, L. Ziegler and Z. Amir The physical and practical problems experienced by cancer survivors: a rapid review and synthesis of the literature <i>European Journal Of Oncology Nursing: The Official Journal Of European Oncology Nursing Society</i> |
| 21 | RR    | 430 | 2011 M. A. Moyad Heart health = urologic health and heart unhealthy = urologic unhealthy: Rapid review of lifestyle changes and dietary supplements <i>Urologic Clinics of North America</i>                                                                                                                                                                                                       |
| 22 | CD RR | 431 | 2014 Pre-emptive oral non-steroidal anti-inflammatory drugs or acetaminophen for knee arthroscopy: a rapid review (Structured abstract)                                                                                                                                                                                                                                                            |
| 23 | CD RR | 432 | 2013 G. Pron Coronary revascularization in ischemic heart failure patients: a rapid review (Structured abstract)                                                                                                                                                                                                                                                                                   |
| 24 | CD RR | 433 | 2015 A. Schaik and A. Lambrinos Vasodilators for in-hospital heart failure management: a rapid review (update) (Structured abstract)                                                                                                                                                                                                                                                               |
| 25 | CD RR | 434 | 2013 S. Brener Local infiltration analgesia in hip and knee arthroplasty: a rapid review (Structured abstract)                                                                                                                                                                                                                                                                                     |
| 26 | CD RR | 435 | 2014 Bracing after knee arthroscopy: a rapid review (Structured abstract)                                                                                                                                                                                                                                                                                                                          |
| 27 | CD RR | 436 | 2014 Preoperative shower or bath with antiseptics before knee arthroscopy: a rapid review (Structured abstract)                                                                                                                                                                                                                                                                                    |
| 28 | CD RR | 437 | 2013 G. Pron Early mobilization and ambulation in hospitalized heart failure patients: a rapid review (Structured abstract)                                                                                                                                                                                                                                                                        |
| 29 |       |     |                                                                                                                                                                                                                                                                                                                                                                                                    |
| 30 |       |     |                                                                                                                                                                                                                                                                                                                                                                                                    |
| 31 |       |     |                                                                                                                                                                                                                                                                                                                                                                                                    |
| 32 |       |     |                                                                                                                                                                                                                                                                                                                                                                                                    |
| 33 |       |     |                                                                                                                                                                                                                                                                                                                                                                                                    |
| 34 |       |     |                                                                                                                                                                                                                                                                                                                                                                                                    |
| 35 |       |     |                                                                                                                                                                                                                                                                                                                                                                                                    |
| 36 |       |     |                                                                                                                                                                                                                                                                                                                                                                                                    |
| 37 |       |     |                                                                                                                                                                                                                                                                                                                                                                                                    |
| 38 |       |     |                                                                                                                                                                                                                                                                                                                                                                                                    |
| 39 |       |     |                                                                                                                                                                                                                                                                                                                                                                                                    |
| 40 |       |     |                                                                                                                                                                                                                                                                                                                                                                                                    |
| 41 |       |     |                                                                                                                                                                                                                                                                                                                                                                                                    |
| 42 |       |     |                                                                                                                                                                                                                                                                                                                                                                                                    |
| 43 |       |     |                                                                                                                                                                                                                                                                                                                                                                                                    |
| 44 |       |     |                                                                                                                                                                                                                                                                                                                                                                                                    |
| 45 |       |     |                                                                                                                                                                                                                                                                                                                                                                                                    |
| 46 |       |     |                                                                                                                                                                                                                                                                                                                                                                                                    |



|    |              |     |                                                                                                                                                                                                                                                                                          |
|----|--------------|-----|------------------------------------------------------------------------------------------------------------------------------------------------------------------------------------------------------------------------------------------------------------------------------------------|
| 1  |              |     |                                                                                                                                                                                                                                                                                          |
| 2  |              |     |                                                                                                                                                                                                                                                                                          |
| 3  | <b>CD RR</b> | 438 | 2014 Intra-articular analgesia after knee arthroscopy: a rapid review (Structured abstract)                                                                                                                                                                                              |
| 4  | <b>CD RR</b> | 439 | 2014 R. B. Costello, C. V. Lentino, C. C. Boyd, M. L. O'Connell, C. C. Crawford, M. L. Sprengel and P. A. Deuster The effectiveness of melatonin for promoting healthy sleep: a rapid evidence assessment of the literature (Provisional abstract)                                       |
| 5  | <b>CD RR</b> | 440 | 2013 Monotherapy versus combination therapy for adults hospitalized for community-acquired pneumonia: a rapid review (Structured abstract)                                                                                                                                               |
| 6  | <b>CD RR</b> | 441 | 2015 Cost-effectiveness of urgent care for transient ischemic attack: an economic rapid review (Structured abstract)                                                                                                                                                                     |
| 7  | <b>CD RR</b> | 442 | 2015 S. L. Birmingham Pulmonary rehabilitation setting for adults with chronic obstructive pulmonary disease (COPD): an economic rapid review (Structured abstract)                                                                                                                      |
| 8  | <b>CD RR</b> | 443 | 2014 K. McMartin Preoperative cardiac stress tests for noncardiac surgery: a rapid review (Structured abstract)                                                                                                                                                                          |
| 9  | <b>CD RR</b> | 444 | 2014 Hemoglobin A1c testing in diabetes: a rapid review (Structured abstract)                                                                                                                                                                                                            |
| 10 | <b>CD RR</b> | 445 | 2014 A. Migliore, T. Jefferson, M. Cerbo, I. Abraha and A. Montedori Implantable devices for the closure of patent foramen ovale in adults: an Italian rapid health technology assessment (Provisional abstract)                                                                         |
| 11 | <b>CD RR</b> | 446 | 2013 A. Schaink Optimized timing of thrombolytic therapy for the treatment of stroke: a rapid review (Structured abstract)                                                                                                                                                               |
| 12 | <b>CD RR</b> | 447 | 2014 T. Lockett, J. Phillips, M. Agar, C. Virdun, A. Green and P. M. Davidson Elements of effective palliative care models: a rapid review (Provisional abstract)                                                                                                                        |
| 13 | <b>CD RR</b> | 448 | 2014 P. M. Dorresteyn, N. A. Ipenburg, K. J. Murphy, M. Smit, J. K. Vulpen, I. Wegner, I. Stegeman and W. Grolman Rapid systematic review of normal audiometry results as a predictor for benign paroxysmal positional vertigo (Provisional abstract)                                    |
| 14 | <b>CD RR</b> | 449 | 2015 D. Roberfroid, L. San Miguel and D. Paulus Non-invasive markers of subclinical atherosclerosis for predicting a primary cardiovascular event: a rapid systematic review (Structured abstract)                                                                                       |
| 15 | <b>CD RR</b> | 450 | 2015 J. Fergenbaum Harms of Prostate-Specific Antigen (PSA) screening in prostate cancer: a rapid review (Structured abstract)                                                                                                                                                           |
| 16 | <b>CD RR</b> | 451 | 2013 Total hip arthroplasty versus hemiarthroplasty for displaced femoral neck fractures: a rapid review (Structured abstract)                                                                                                                                                           |
| 17 | <b>CD RR</b> | 452 | 2013 S. Brener Anesthesia among patients undergoing knee arthroplasty: a rapid review (Structured abstract)                                                                                                                                                                              |
| 18 | <b>CD RR</b> | 453 | 2013 M. Nikitovic Antibiotic-laden bone cement for primary knee arthroplasty: a rapid review (Structured abstract)                                                                                                                                                                       |
| 19 | <b>CD RR</b> | 454 | 2013 M. Nikitovic Clinical utility of echocardiography for patients with hip fracture: a rapid review (Structured abstract)                                                                                                                                                              |
| 20 | <b>CD RR</b> | 455 | 2013 M. Ghazipura Shorter versus longer duration of antibiotic therapy in patients with community-acquired pneumonia: a rapid review (Structured abstract)                                                                                                                               |
| 21 | <b>CD RR</b> | 456 | 2015 M. Ghazipura Home-based versus centre-based rehabilitation for community-dwelling postacute stroke patients: an economic rapid review (Structured abstract)                                                                                                                         |
| 22 | <b>CD RR</b> | 457 | 2013 M. Ghazipura Usefulness of urinary antigen testing for Legionella in the treatment of community-acquired pneumonia: a rapid review (Structured abstract)                                                                                                                            |
| 23 | <b>CD RR</b> | 458 | 2014 K. H. Chaiyachati, O. Ogbuaji, M. Price, A. B. Suthar, E. K. Negussie and T. Barnighausen Interventions to improve adherence to antiretroviral therapy: a rapid systematic review (Provisional abstract)                                                                            |
| 24 | <b>CD RR</b> | 459 | 2013 S. Brener Optimal timing of hip fracture surgery: a rapid review (Structured abstract)                                                                                                                                                                                              |
| 25 | <b>CD RR</b> | 460 | 2014 E. S. Scheer-Horst, P. P. Benthem, T. D. Bruintjes, R. B. Leeuwen and H. J. Zaag-Loonen The efficacy of vestibular rehabilitation in patients with benign paroxysmal positional vertigo: a rapid review (Provisional abstract)                                                      |
| 26 | <b>CD RR</b> | 461 | 2014 S. Hinrichs, D. Jahagirdar, C. Miani, B. Guerin and E. Nolte Learning for the NHS on procurement and supply chain management: a rapid evidence assessment (Structured abstract)                                                                                                     |
| 27 | <b>CD RR</b> | 462 | 2014 E. Toomey, L. Currie-Murphy, J. Matthews and D. A. Hurley The effectiveness of physiotherapist-delivered group education and exercise interventions to promote self-management for people with osteoarthritis and chronic low back pain: rapid review Part I (Provisional abstract) |
| 28 | <b>CD RR</b> | 463 | 2013 Simultaneous or staged bilateral knee arthroplasty: a rapid review (Structured abstract)                                                                                                                                                                                            |
| 29 |              |     |                                                                                                                                                                                                                                                                                          |
| 30 |              |     |                                                                                                                                                                                                                                                                                          |
| 31 |              |     |                                                                                                                                                                                                                                                                                          |
| 32 |              |     |                                                                                                                                                                                                                                                                                          |
| 33 |              |     |                                                                                                                                                                                                                                                                                          |
| 34 |              |     |                                                                                                                                                                                                                                                                                          |
| 35 |              |     |                                                                                                                                                                                                                                                                                          |
| 36 |              |     |                                                                                                                                                                                                                                                                                          |
| 37 |              |     |                                                                                                                                                                                                                                                                                          |
| 38 |              |     |                                                                                                                                                                                                                                                                                          |
| 39 |              |     |                                                                                                                                                                                                                                                                                          |
| 40 |              |     |                                                                                                                                                                                                                                                                                          |
| 41 |              |     |                                                                                                                                                                                                                                                                                          |
| 42 |              |     |                                                                                                                                                                                                                                                                                          |
| 43 |              |     |                                                                                                                                                                                                                                                                                          |
| 44 |              |     |                                                                                                                                                                                                                                                                                          |
| 45 |              |     |                                                                                                                                                                                                                                                                                          |
| 46 |              |     |                                                                                                                                                                                                                                                                                          |

|    |              |     |                                                                                                                                                                                                                                                                             |
|----|--------------|-----|-----------------------------------------------------------------------------------------------------------------------------------------------------------------------------------------------------------------------------------------------------------------------------|
| 1  |              |     |                                                                                                                                                                                                                                                                             |
| 2  |              |     |                                                                                                                                                                                                                                                                             |
| 3  | <b>CD RR</b> | 464 | 2013 S. Brener The effectiveness of cement in primary hip replacements: a rapid review (Structured abstract)                                                                                                                                                                |
| 4  | <b>CD RR</b> | 465 | 2013 L. Dennett and C. Harstall Stingray catheter and guidewire for recanalization of coronary chronic total occlusions: A rapid evidence assessment (Structured abstract)                                                                                                  |
| 5  | <b>CD RR</b> | 466 | 2014 J. Turner, L. Preston, A. Booth, C. O'Keeffe, F. Campbell, A. Jesurasa, K. Cooper and Goyder What evidence is there for a relationship between organisational features and patient outcomes in congenital heart disease services? A rapid review (Structured abstract) |
| 6  | <b>CD RR</b> | 467 | 2014 I. Wegner, M. E. Niesten, C. H. Werkhoven and W. Grolman Rapid systematic review of the Epley maneuver versus vestibular rehabilitation for benign paroxysmal positional vertigo (Provisional abstract)                                                                |
| 7  | <b>CD RR</b> | 468 | 2013 Antibiotic coverage in atypical pathogens for adults hospitalized with community-acquired pneumonia: a rapid review (Structured abstract)                                                                                                                              |
| 8  | <b>CD RR</b> | 469 | 2013 S. Brener Electrocardiograms for diagnosing ischemia as a precipitant to acute heart failure: a rapid review (Structured abstract)                                                                                                                                     |
| 9  | <b>CD RR</b> | 470 | 2013 A. Schaink Vasodilators for in-hospital heart failure management: a rapid review (Structured abstract)                                                                                                                                                                 |
| 10 | <b>CD RR</b> | 471 | 2013 Severity assessment tools for patients with community-acquired pneumonia: a rapid review (Structured abstract)                                                                                                                                                         |
| 11 | <b>CD RR</b> | 472 | 2014 H. Reinink, I. Wegner, I. Stegeman and W. Grolman Rapid systematic review of repeated application of the Epley maneuver for treating posterior BPPV (Provisional abstract)                                                                                             |
| 12 | <b>CD RR</b> | 473 | 2015 Effect of a 60-minute door-to-needle tissue plasminogen activator on stroke disability: a rapid review (Structured abstract)                                                                                                                                           |
| 13 | <b>CD RR</b> | 474 | 2013 S. Brener Chest X-rays for diagnosing pulmonary infection as a precipitant of acute heart failure: a rapid review (Structured abstract)                                                                                                                                |
| 14 | <b>CD RR</b> | 475 | 2014 Predictive validity of tools used to assess the risk of unplanned admissions: A rapid review of the evidence (Structured abstract)                                                                                                                                     |
| 15 | <b>CD RR</b> | 476 | 2014 Testing vitamin B12 levels in neuropathy, alopecia, dizziness, and fatigue: a rapid review (Structured abstract)                                                                                                                                                       |
| 16 | <b>CD RR</b> | 477 | 2015 Ultrafiltration in heart failure: a rapid review (Structured abstract)                                                                                                                                                                                                 |
| 17 | <b>CD RR</b> | 478 | 2013 Optimal onset-to-admission interval for inpatient stroke rehabilitation: a rapid review (Structured abstract)                                                                                                                                                          |
| 18 | <b>CD RR</b> | 479 | 2012 B. H. Jang, H. Y. Lee, Y. J. Jung and J. H. An Efficacy of atomoxetine and methylphenidate in attention deficits hyperactivity disorder in adults: a rapid review (Structured abstract)                                                                                |
| 19 | <b>CD RR</b> | 480 | 2013 K. Bond, L. Dennett, C. Harstall, C. Yan and A. Chuck Total prosthetic replacement of the temporomandibular joint: a rapid evidence assessment and economic analysis (Structured abstract)                                                                             |
| 20 | <b>CD RR</b> | 481 | 2013 S. Sehatzadeh Effectiveness of increased intensity of rehabilitation in post-stroke patients: a rapid review (Structured abstract)                                                                                                                                     |
| 21 | <b>CD RR</b> | 482 | 2014 Z. X. Yang, J. T. Shen, Y. P. Li, K. Zhao, C. H. Shi, Y. Xiao, J. J. Yu, W. D. Guo, C. C. Li, Y. Q. Wang and X. L. Li Helical tomotherapy for cancer treatment: a rapid health technology assessment (Provisional abstract)                                            |
| 22 | <b>CD RR</b> | 483 | 2013 S. Sehatzadeh Transient ischemic attack: where can patients receive optimal care? A rapid review (Structured abstract)                                                                                                                                                 |
| 23 | <b>CD RR</b> | 484 | 2013 M. Nikitovic Intramedullary nails in comparison with sliding hip screws for intertrochanteric hip fractures: a rapid review (Structured abstract)                                                                                                                      |
| 24 | <b>CD RR</b> | 485 | 2013 K. McMartin B-type natriuretic peptide testing: a rapid review (Structured abstract)                                                                                                                                                                                   |
| 25 | <b>CD RR</b> | 486 | 2013 M. Nikitovic Intensity of rehabilitation during the acute hospitalization period after hip or knee arthroplasty: a rapid review (Structured abstract)                                                                                                                  |
| 26 | <b>CD RR</b> | 487 | 2013 Criteria for switching from intravenous to oral antibiotics in patients hospitalized with community-acquired pneumonia: a rapid review (Structured abstract)                                                                                                           |
| 27 | <b>CD RR</b> | 488 | 2014 J. G. Duijn, L. M. Isfordink, J. A. Nij Bijvank, C. W. Stapper, A. J. Vuren, I. Wegner, M. F. Kortekaas and W. Grolman Rapid systematic review of the Epley maneuver for treating posterior canal benign paroxysmal positional vertigo (Provisional abstract)          |
| 28 | <b>CD RR</b> | 489 | 2013 S. Brener Nerve blocks for pain management in patients with hip fractures: a rapid review (Structured abstract)                                                                                                                                                        |
| 29 |              |     |                                                                                                                                                                                                                                                                             |
| 30 |              |     |                                                                                                                                                                                                                                                                             |
| 31 |              |     |                                                                                                                                                                                                                                                                             |
| 32 |              |     |                                                                                                                                                                                                                                                                             |
| 33 |              |     |                                                                                                                                                                                                                                                                             |
| 34 |              |     |                                                                                                                                                                                                                                                                             |
| 35 |              |     |                                                                                                                                                                                                                                                                             |
| 36 |              |     |                                                                                                                                                                                                                                                                             |
| 37 |              |     |                                                                                                                                                                                                                                                                             |
| 38 |              |     |                                                                                                                                                                                                                                                                             |
| 39 |              |     |                                                                                                                                                                                                                                                                             |
| 40 |              |     |                                                                                                                                                                                                                                                                             |
| 41 |              |     |                                                                                                                                                                                                                                                                             |
| 42 |              |     |                                                                                                                                                                                                                                                                             |
| 43 |              |     |                                                                                                                                                                                                                                                                             |
| 44 |              |     |                                                                                                                                                                                                                                                                             |
| 45 |              |     |                                                                                                                                                                                                                                                                             |
| 46 |              |     |                                                                                                                                                                                                                                                                             |



|    |       |                                |
|----|-------|--------------------------------|
| 1  |       |                                |
| 2  |       |                                |
| 3  | CSR   | Cochrane systematic review     |
| 4  |       |                                |
| 5  | SR    | Systematic review              |
| 6  |       |                                |
| 7  | RR    | Rapid review                   |
| 8  |       |                                |
| 9  | CD RR | Cochrane database rapid review |
| 10 |       |                                |
| 11 |       |                                |
| 12 |       |                                |
| 13 |       |                                |
| 14 |       |                                |
| 15 |       |                                |
| 16 |       |                                |
| 17 |       |                                |
| 18 |       |                                |
| 19 |       |                                |
| 20 |       |                                |
| 21 |       |                                |
| 22 |       |                                |
| 23 |       |                                |
| 24 |       |                                |
| 25 |       |                                |
| 26 |       |                                |
| 27 |       |                                |
| 28 |       |                                |
| 29 |       |                                |
| 30 |       |                                |
| 31 |       |                                |
| 32 |       |                                |
| 33 |       |                                |
| 34 |       |                                |
| 35 |       |                                |
| 36 |       |                                |
| 37 |       |                                |
| 38 |       |                                |
| 39 |       |                                |
| 40 |       |                                |
| 41 |       |                                |
| 42 |       |                                |
| 43 |       |                                |
| 44 |       |                                |
| 45 |       |                                |
| 46 |       |                                |

For peer review only

1  
2  
3  
4  
5  
6  
7  
8  
9  
10  
11  
12  
13  
14  
15  
16  
17  
18  
19  
20  
21  
22  
23  
24  
25  
26  
27  
28  
29  
30  
31  
32  
33  
34  
35  
36  
37  
38  
39  
40  
41  
42  
43  
44  
45  
46  
47

**Supplementary Table S2: Retrieved reviews of health services research, 2011 to 2015.**

|                                                          | 2011 (%)     | 2012 (%)     | 2013 (%)      | 2014 (%)      | 2015 (%)      | Total (%)     |
|----------------------------------------------------------|--------------|--------------|---------------|---------------|---------------|---------------|
| <b>Cochrane SR</b>                                       | 64 (0.8)     | 115 (1.2)    | 121 (1.0)     | 119 (0.8)     | 114 (0.8)     | 533 (0.9)     |
| Extracted                                                | 5            | 7            | 9             | 7             | 2             | 30            |
| <b>SR</b>                                                | 7,746 (98.9) | 9,676 (98.6) | 11,860 (98.4) | 14,131 (98.5) | 13,573 (98.6) | 56,986 (98.6) |
| Extracted                                                | 1            | 5            | 6             | 9             | 9             | 30            |
| <b>SR total</b>                                          | 7,810 (99.7) | 9,791 (99.8) | 11,981 (99.4) | 14,250 (99.3) | 13,687 (99.4) | 57,519 (99.5) |
| <b>RR</b>                                                | 26 (0.3)     | 24 (0.2)     | 37 (0.3)      | 71 (0.5)      | 50 (0.4)      | 208 (0.4)     |
| Extracted                                                | 3            | 3            | 5             | 15            | 4             | 30            |
| <b>CD RR</b>                                             | 0            | 1 (0)        | 40 (0.3)      | 27 (0.2)      | 27 (0.2)      | 95 (0.2)      |
| Extracted                                                | 0            | 0            | 10            | 3             | 17            | 30            |
| <b>RR total</b>                                          | 26 (0.3)     | 25 (0.2)     | 77 (0.6)      | 98 (0.7)      | 77 (0.6)      | 303 (0.5)     |
| <b>Total, overall</b>                                    | 7,836 (100)  | 9,816 (100)  | 12,058 (100)  | 14,348 (100)  | 13,764 (100)  | 57,822 (100)  |
| <b>Proportion All SR/RR</b>                              | 300.4        | 391.6        | 155.6         | 145.4         | 177.8         | 189.8         |
| <b>Proportion All RR/SR (<math>\cdot 10^{-3}</math>)</b> | 3.3          | 2.6          | 6.4           | 6.9           | 5.6           | 5.3           |

1  
2  
3  
4  
5  
6  
7  
8  
9  
10  
11  
12  
13  
14  
15  
16  
17  
18  
19  
20  
21  
22  
23  
24  
25  
26  
27  
28  
29  
30  
31  
32  
33  
34  
35  
36  
37  
38  
39  
40  
41  
42  
43  
44  
45  
46  
47

RR: Rapid review; SR: Systematic review; CD: Cochrane database

For peer review only

1  
2  
3  
4  
5  
6  
7  
8  
9  
10  
11  
12  
13  
14  
15  
16  
17  
18  
19  
20  
21  
22  
23  
24  
25  
26  
27  
28  
29  
30  
31  
32  
33  
34  
35  
36  
37  
38  
39  
40  
41  
42  
43  
44  
45  
46  
47  
48  
49  
50  
51  
52  
53  
54  
55  
56  
57  
58  
59  
60

For peer review only

# BMJ Open

## Characteristics of stakeholder involvement in systematic and rapid reviews: a methodological review in the area of health services research

|                                 |                                                                                                                                                                                                                                                                                             |
|---------------------------------|---------------------------------------------------------------------------------------------------------------------------------------------------------------------------------------------------------------------------------------------------------------------------------------------|
| Journal:                        | <i>BMJ Open</i>                                                                                                                                                                                                                                                                             |
| Manuscript ID                   | bmjopen-2018-024587.R1                                                                                                                                                                                                                                                                      |
| Article Type:                   | Research                                                                                                                                                                                                                                                                                    |
| Date Submitted by the Author:   | 21-Jan-2019                                                                                                                                                                                                                                                                                 |
| Complete List of Authors:       | Feldmann, Jonas; University of Zurich, Institute of Epidemiology, Biostatistics and Prevention<br>Puhan, Milo; University of Zurich, Institute of Epidemiology, Biostatistics & Prevention<br>Mütsch, Margot; University of Zurich, Institute of Epidemiology, Biostatistics and Prevention |
| <b>Primary Subject Heading</b>: | Research methods                                                                                                                                                                                                                                                                            |
| Secondary Subject Heading:      | Health services research                                                                                                                                                                                                                                                                    |
| Keywords:                       | stakeholder, systematic review, rapid review, evidence                                                                                                                                                                                                                                      |
|                                 |                                                                                                                                                                                                                                                                                             |

SCHOLARONE™  
Manuscripts

1  
2  
3  
4 **Characteristics of stakeholder involvement in systematic and rapid**  
5 **reviews:**  
6  
7  
8 **a methodological review in the area of health services research**  
9  
10  
11  
12  
13  
14

15 **Jonas Feldmann, Milo A. Puhan, Margot Mutsch\***  
16  
17  
18  
19

20 For all authors: Department of Epidemiology, Epidemiology, Biostatistics and Prevention  
21 Institute (EBPI), University of Zurich, Zurich, Switzerland  
22  
23  
24  
25  
26  
27  
28  
29

30 \* Corresponding author: Margot Mutsch, Department of Epidemiology, Epidemiology,  
31 Biostatistics and Prevention Institute (EBPI), University of Zurich, Hirschengraben 84, 8001  
32 Zurich, Switzerland. Phone: +41 44 634 4857; Email: [margot.muetsch@uzh.ch](mailto:margot.muetsch@uzh.ch).  
33  
34  
35  
36  
37  
38  
39  
40  
41  
42  
43  
44  
45  
46  
47  
48  
49  
50  
51  
52  
53  
54  
55  
56  
57  
58  
59  
60

## ABSTRACT

**Objective** Engaging stakeholders in reviews is considered to generate more relevant evidence and to facilitate its dissemination and use. As little is known about stakeholder involvement, we assessed the extent and characteristics of their engagement in systematic and rapid reviews. Stakeholders were defined as people with a particular interest in the research topic (but were not members of the primary research team).

**Design** Methodological review

**Search strategy** Four databases (Medline, Embase, Cochrane database of systematic reviews, databases of the University of York, Center for Reviews and Dissemination (CRD)) were searched based on an a priori protocol. Four types of reviews (Cochrane and non-Cochrane systematic reviews, rapid and CRD rapid reviews) were retrieved between January, 2011 and October, 2015, pooled by review type and duplicates excluded. A sample of 30 reviews for each group was randomly selected resulting in a total of 120 reviews. Reporting characteristics, reporting quality using AMSTAR and factors of stakeholder involvement were assessed.

**Results** A total of 533 (0.9%) reviews were Cochrane, 56,986 (98.5%) non-Cochrane systematic reviews, 208 (0.4%) rapid reviews and 95 (0.2%) CRD reviews. We found stakeholder involvement in 13% (4/30) of Cochrane, 20% (6/30) of non-Cochrane systematic reviews, 40% (13/30) of rapid reviews and 93% (28/30) of CRD rapid reviews. Overall, 33% (17/51) of the responding contact authors mentioned, but did not specify, positive effects of stakeholder involvement. A conflict of interest statement remained unmentioned in 40% (12/30) of non-Cochrane systematic reviews and in 27% (8/30) of rapid reviews, but not in Cochrane or CRD reviews.

**Conclusion** Stakeholder engagement was not general practice in either review type (except for CRD rapid reviews), although it was more common in rapid reviews. Especially for non-Cochrane systematic reviews, there is a potential to improve reporting, such as including an a priori study protocol, or to engage stakeholders.



1  
2  
3  
4  
5 **Keywords:** stakeholder, systematic review, rapid review, evidence  
6  
7  
8  
9  
10

## 11 **STRENGTHS AND LIMITATIONS OF THIS STUDY**

12

- 13 • A systematic approach to assess stakeholder engagement in systematic and rapid  
14 reviews was used to fill the gap and to provide an overview of the current situation.  
15
- 16 • Different review types were able to inform on stakeholder involvement and pointed to  
17 potential improvements.  
18
- 19 • With the scope of this study being restricted to health services research we intended to  
20 focus on a best-case approach where the context is considered most important and  
21 therefore, stakeholder involvement might be most regularly, but the overall findings  
22 might not be applicable beyond this domain.  
23
- 24 • The majority of studies were from higher-income countries limiting the generalizability  
25 beyond this setting.  
26
- 27 • The perception and the reporting of stakeholder involvement might be influenced by the  
28 lack of a uniform definition of stakeholders and depend on the criteria used.  
29  
30  
31  
32  
33  
34  
35  
36  
37  
38  
39  
40  
41  
42  
43  
44  
45  
46  
47  
48  
49  
50  
51  
52  
53  
54  
55  
56  
57  
58  
59  
60

## INTRODUCTION

Evidence synthesis remains a rapidly growing field. There are different methodological approaches and formats depending on the research question and the intended use of the review, such as scoping, systematic or rapid reviews as well as realist syntheses, policy briefs and health technology assessments. We will focus on full systematic reviews as a well-established review type in healthcare and on rapid reviews as an emerging one. A traditional full systematic review is a review that “attempts to collate all empirical evidence and that fits pre-specified eligibility criteria in order to answer a specific, usually narrow research question or intervention”. [1] Within systematic reviews, Cochrane full systematic reviews were established as “gold standard” in knowledge synthesis. A couple of studies compared Cochrane and non-Cochrane systematic reviews and found that the reporting of Cochrane systematic reviews was the most complete one [2], that they were less prone to bias due to greater transparency in reporting as well as due to the quality criteria used, such as the risk of bias assessment [3]. Furthermore, Hopewell et al. described that the inclusion of grey literature routinely performed in Cochrane systematic reviews limited publication bias and provided more conservative treatment effects compared to non-Cochrane systematic reviews without including grey literature. [4]

Rapid reviews are characterized by a less complex research question and aim to synthesize evidence within a shorter time period, with time frames ranging from one week to nine months. [5, 6] They might, therefore, be prone to be of lower validity as a consequence of accelerating and streamlining the review process. [5] However, in response to an increasing demand from stakeholders, rapid reviews are being performed more frequently than before. [6] Only few formal definitions of different rapid reviews exist and few studies have examined their methodology. [7] To contribute to fill this gap, the Cochrane Rapid Reviews Method Group was established in 2015. To cover the variety of rapid reviews we included rapid reviews listed in medical databases as well as other rapid reviews from the databases of the University of York,

1  
2  
3 Center for Reviews and Dissemination ([www.crd.york.ac.uk/CRDWeb](http://www.crd.york.ac.uk/CRDWeb)), such as the Dare  
4 reviews (Database of Abstracts of Reviews of Effects) or health technology assessments (CRD  
5 rapid reviews). Rapid reviews target specific audiences including government policymakers,  
6 health care institutions, health professionals and patient associations and research questions  
7 are often tailored to these stakeholders .[8, 9]  
8  
9  
10  
11  
12  
13  
14

15 Stakeholder as a very broad term may include anyone affected by an issue and/or anyone  
16 who can provide input on the topic.[10, 11] Hence, not only decision makers, health  
17 professionals and their organisations are targeted, but also citizen or patients, other researchers  
18 and the media. Involving stakeholders in health research might be possible at all stages of  
19 systematic or rapid reviews and this is often referred to as coproduction. Hence, stakeholder  
20 engagement aims participatory research and might include directing the research question,  
21 defining the scope and context of the review as well as contributing to the literature search, the  
22 evidence synthesis and interpretation and facilitating dissemination and use. Therefore, it  
23 enhances the relevance of findings for policy and practice and contributes to the sustainability of  
24 health systems.[12-14] We especially focused on stakeholder involvement among health  
25 services research. This embraced the multidisciplinary field of scientific studies regarding social,  
26 financing and personal factors, organizational structures and processes, health technologies,  
27 and how these factors affect access to, the quality and cost of health care, and ultimately, our  
28 health and well-being".[15] Here, we considered the context of conducted studies and  
29 dissemination issues as most important, and hence, we expected health services research to be  
30 the research field where stakeholders were involved most regularly.  
31  
32  
33  
34  
35  
36  
37  
38  
39  
40  
41  
42  
43  
44  
45  
46  
47  
48  
49  
50  
51  
52

### 53 **Study aim**

54 To date, little is known about the extent of stakeholder engagement in systematic and  
55 rapid reviews and there have been few efforts to directly report the specific effects regarding  
56 stakeholder involvement in reviews. We consider this information to be relevant for integrated  
57  
58  
59  
60

1  
2  
3 knowledge translation, the dissemination and acceptance of systematic and rapid reviews in  
4 policy and practice. We focused on systematic and rapid reviews as they represent different  
5 types of evidence synthesis and are well-established in research and practice. In addition,  
6 reviews needed to belong to the area of health services research as an established field for  
7 systematic and rapid reviews as well as a best-case sample with a considerable extent of  
8 stakeholder involvement. We aimed to assess the extent and characteristics of stakeholder  
9 engagement in recently published systematic and rapid reviews and to specifically determine  
10 reporting characteristics.  
11  
12  
13  
14  
15  
16  
17  
18  
19  
20  
21

## 22 **METHODS**

### 23 **Study design**

24  
25  
26 Based on the pre-specified protocol this methodological review was performed to assess  
27 characteristics and reporting of stakeholder engagement in random samples of systematic and  
28 rapid reviews in the field of health services research (Supplementary File S1). A total of four  
29 types of reviews, two groups of each, systematic and rapid reviews, were assessed as they  
30 were considered to exhibit potentially differences in stakeholder involvement. This included  
31 Cochrane systematic reviews, non-Cochrane systematic reviews, rapid reviews and rapid  
32 reviews of the databases of the University of York, Center for Reviews and Dissemination (CRD  
33 rapid reviews). For the reporting of this study the PRISMA checklist was used (Supplementary  
34 File S2).  
35  
36  
37  
38  
39  
40  
41  
42  
43  
44  
45  
46  
47

### 48 **Search strategy and screening**

49  
50 For systematic reviews, we searched the Cochrane database of systematic reviews for  
51 articles including the term “systematic review” in their title or abstract (Cochrane systematic  
52 reviews) and EBSCO Medline and Embase with excluding the term “Cochrane” in title or  
53 abstract (non-Cochrane systematic reviews). Rapid reviews were searched in EBSCO Medline  
54 and Embase and in the databases of the University of York, Center for Reviews and  
55  
56  
57  
58  
59  
60

1  
2  
3 Dissemination ([www.crd.york.ac.uk/CRDWeb](http://www.crd.york.ac.uk/CRDWeb)) (CRD rapid reviews). Sample search strategies  
4 are depicted in Supplementary Files S3a and S3b. We included studies published between  
5 January, 2011 and December, 2015 without language restriction. Our search was completed on  
6 October 22<sup>nd</sup>, 2015 and therefore, the search results for 2015 did not cover the whole year. All  
7 results were pooled by review type and duplicates were excluded based on authors, journal and  
8 publication year. For each of the four lists of study types, each reference was given a unique  
9 random number using the `sample()` function available in R [16]. Each list was then sorted by the  
10 random number, and the articles were screened in order for inclusion and exclusion criteria by  
11 two reviewers (JF following introduction and spot-checking by MM) until a total of 30 studies  
12 were reached per group. Full text screening was performed to ensure the decision. One review  
13 author (JF) performed data extraction, supervised and spot-checked by a second researcher  
14 (MM). Disagreements were resolved by consensus.

### 30 **Sample size and selection of review groups**

31  
32 As rapid reviews were often targeted to specific audiences [8, 9], they were expected to  
33 involve stakeholders to a greater extent. We estimated a proportion of stakeholder involvement  
34 of 0.70 for rapid reviews and of 0.25 for systematic reviews, which resulted in a minimal  
35 expected difference of 0.45. For a two group-comparison, rapid and systematic reviews, with  
36  $n=25$  per group there will be an estimated power of 0.88 and an alpha of 0.023. To account for  
37 a potential subgroup analysis, we included a sample of  $n=30$  reviews per group, with four  
38 review groups (Cochrane and non-Cochrane systematic reviews, rapid and CRD rapid reviews).  
39 This resulted in an overall sample of 120 studies.

### 51 **Inclusion and exclusion criteria**

52  
53 We included reviews targeting health services research as defined by Lohr [15]: "Health  
54 services research is the multidisciplinary field of scientific investigation that studies how social  
55 factors, financing systems, organizational structures and processes, health technologies, and  
56 personal behaviors affect access to health care, the quality and cost of health care, and  
57  
58  
59  
60

1  
2  
3 ultimately, our health and well-being. Its research domains are individuals, families,  
4 organizations, institutions, communities, and populations.” Therefore, we included Health  
5 Technology Assessments (e.g. rapid reviews as part of HTAs) targeting effectiveness as well as  
6 meta-analyses and systematic reviews for effectiveness and utility, reviews of pharmaceutical  
7 trials under everyday conditions, reviews of basic research in care-related fields, reviews of  
8 quality research or of methodological developments in the field of health services research,  
9 reviews about the development and application of new technologies (ehealth) and the  
10 implementation of knowledge into clinical practice. We excluded reviews that focused  
11 exclusively on economic or cost analyses, performed a narrative review, an overview of reviews  
12 or a protocol of a systematic review in order not to mix so different methodological approaches.  
13 The following study types were also excluded: Reviews of efficacy studies without assessing the  
14 quality of life, reviews including clinical efficacy trials phase I to III, epidemiological reviews to  
15 assess determinants or risk factors, non-human studies, establishment of databases or  
16 registries, reviews with unclear design or description of the intervention.

### 34 **Data extraction**

35  
36 Stakeholders were defined as people with a particular interest in the research topic (but  
37 were not members of the primary research team).[10, 17] We evaluated any kind of stakeholder  
38 involvement and recorded different groups of stakeholders: Institutional health care providers,  
39 representatives of hospitals or community services, patients/consumers, participants of  
40 government agencies and health care policymakers at Federal, State and local levels,  
41 associations of health professionals and researchers (if not members of the primary study team).  
42 If available, we identified their fields and stages of involvement as well as their contribution to  
43 the study. This included all review steps, such as formulating the research question(s),  
44 determining study characteristics, contributing to the writing of the protocol, participating within  
45 the review process with searching, screening, data extraction, synthesizing, interpreting the  
46 study results and/or establishing recommendations. In addition, we extracted the following data:  
47 institution where the review was performed, contact details of the corresponding author, the  
48  
49  
50  
51  
52  
53  
54  
55  
56  
57  
58  
59  
60

1  
2  
3 type of intervention, study setting, characteristics of the population (sample size, age range,  
4 sex), funding, declared conflict of interest, year of publication. The methodological quality of  
5 included articles was assessed using the AMSTAR tool, a measurement tool for the  
6 assessment of the methodological quality of systematic reviews.[18] Where available, our rating  
7 was compared with an already existing one from the “health evidence” or “health systems  
8 evidence” platforms.[19, 20] Both quality ratings were then categorized as strong ( $\geq 8$ ), moderate  
9 (4-7) or weak ( $< 4$ ). In the absence of a quality assessment tool for rapid reviews, we used  
10 AMSTAR also for rapid reviews, being aware that this might result in lower rating scores due to  
11 abbreviated procedures. In addition, the use of the PRISMA checklist was recorded when  
12 mentioned in the articles.[21] AMSTAR ratings are presented as Supplementary file S4, study  
13 characteristics as Supplementary file S5.

14  
15  
16  
17  
18  
19  
20  
21  
22  
23  
24  
25  
26 To ascertain stakeholder engagement as well as to assess the extent or stages of their  
27 involvement, pre-formulated questions were sent by email to the contact authors of the included  
28 articles. We asked them, if there had been any stakeholder involvement (yes or no) and if so, to  
29 specify the number of stakeholders, the stages of involvement and their self-assessed  
30 estimation of the effect of stakeholder engagement on the review outcome. In case of missing  
31 responses, one reminder was sent.

32  
33  
34  
35  
36  
37  
38  
39  
40  
41 **Patient and Public involvement** None involved.

## 42 43 44 45 46 **RESULTS**

47  
48 Our search identified 57,822 citations remaining after exclusion of duplicates. 533 (0.9%)  
49 of them were categorized as Cochrane systematic reviews, 56,986 (98.6%) as non-Cochrane  
50 systematic reviews, 95 (0.2%) as CRD rapid reviews and 208 (0.4%) as rapid reviews. A total of  
51 227 non-Cochrane systematic reviews (0.4%), 128 Cochrane systematic reviews (24%), 165  
52 rapid reviews (79.3%) and 89 CRD rapid reviews (93.7%) had to be screened to get the study  
53 sample.[22-141] Therefore, 197 non-Cochrane systematic reviews, 98 Cochrane systematic  
54  
55  
56  
57  
58  
59  
60



1  
2  
3 reviews, 135 rapid reviews and 59 CRD rapid reviews were excluded following title and abstract  
4 screening, because they did not meet the inclusion criteria. (Supplementary Table S1). Figure 1  
5 presents the flow diagram of study inclusion.  
6  
7  
8  
9

10  
11 *[insert Figure 1 here]*  
12  
13  
14  
15

16 **Table 1**

17 **Characteristics of included reviews by review type**

18  
19  
20

|                                                                             | <b>Cochrane<br/>SR (%)</b> | <b>Non-Cochrane<br/>SR (%)</b> | <b>RR (%)</b> | <b>CRD RR<br/>(%)</b> | <b>Total (%)</b> |
|-----------------------------------------------------------------------------|----------------------------|--------------------------------|---------------|-----------------------|------------------|
| <b>Total number of records</b>                                              | 533                        | 56,986                         | 208           | 95                    | 57,822           |
| <b>Random sample (% of total)</b>                                           | 30 (6)                     | 30 (0.1)                       | 30 (14)       | 30 (32)               | 120 (0.2)        |
| <b>Geographic location of the corresponding author (% of random sample)</b> |                            |                                |               |                       |                  |
| Africa                                                                      | 2 (7)                      | 0                              | 0             | 0                     | 2 (2)            |
| Asia                                                                        | 5 (17)                     | 3 (10)                         | 1 (3)         | 0                     | 9 (8)            |
| Australia                                                                   | 3 (10)                     | 5 (17)                         | 2 (7)         | 0                     | 10 (8)           |
| Europe                                                                      | 11 (37)                    | 13 (43)                        | 13 (43)       | 2 (7)                 | 39 (33)          |
| North America                                                               | 7 (23)                     | 8 (27)                         | 14 (47)       | 28 (93)               | 57 (48)          |
| South America                                                               | 2 (7)                      | 1 (3)                          | 0             | 0                     | 3 (3)            |
| <b>Thematic focus</b>                                                       |                            |                                |               |                       |                  |
| Prevention                                                                  | 11 (37)                    | 5 (17)                         | 4 (13)        | 7 (23)                | 27 (23)          |
| Treatment                                                                   | 18 (60)                    | 14 (47)                        | 15 (50)       | 16 (53)               | 63 (53)          |

21  
22  
23  
24  
25  
26  
27  
28  
29  
30  
31  
32  
33  
34  
35  
36  
37  
38  
39  
40  
41  
42  
43  
44  
45  
46  
47  
48  
49  
50  
51  
52  
53  
54  
55  
56  
57  
58  
59  
60

|                                    |            |           |           |           |           |
|------------------------------------|------------|-----------|-----------|-----------|-----------|
| Health system                      | 1 (3)      | 2 (7)     | 7 (23)    | 7 (23)    | 17 (14)   |
| Community-based <sup>1</sup>       | 0          | 9 (30)    | 4 (13)    | 0         | 13 (11)   |
| <b>Funding</b>                     |            |           |           |           |           |
| Governmental, institutional or WHO | 30 (100)   | 30 (100)  | 30 (100)  | 30 (100)  | 120 (100) |
| Additional funding by company      | 0          | 0         | 1 (3)     | 0         | 1 (1)     |
| <b>Conflict of interest (COI)</b>  |            |           |           |           |           |
| Declared none                      | 21 (70)    | 15 (50)   | 19 (63)   | 29 (97)   | 84 (70)   |
| COI declared                       | 9 (30)     | 3 (10)    | 3 (10)    | 0         | 15 (13)   |
| Unmentioned                        | 0          | 12 (40)   | 8 (27)    | 1 (3)     | 21 (18)   |
| <b>Study protocol</b>              |            |           |           |           |           |
| Yes, mentioned in article          | 30 (100)   | 5 (17)    | 4 (13)    | 1 (3)     | 40 (33)   |
| Yes, mentioned in correspondence   | 0          | 8 (27)    | 9 (30)    | 0         | 17 (14)   |
| No, confirmed by correspondence    | 0          | 2 (7)     | 4 (13)    | 0         | 6 (5)     |
| Unmentioned                        | 0          | 15 (50)   | 13 (43)   | 29 (97)   | 57 (48)   |
| <b>AMSTAR rating</b>               |            |           |           |           |           |
| Median (range)                     | 11 (7, 11) | 7 (3, 11) | 4 (2, 10) | 8 (5, 11) | 8 (2, 11) |

With exclusion of treatment or preventive interventions

AMSTAR: measurement tool for the “assessment of the methodological quality of systematic reviews”, not applicable questions were not counted. Higher AMSTAR scores indicate higher quality.

SR: systematic review; RR: rapid review; CRD: databases of the University of York, Center for Reviews and Dissemination; WHO: World Health Organisation.

1  
2  
3  
4  
5  
6  
7  
8  
9  
10  
11  
12  
13  
14  
15  
16  
17  
18  
19  
20  
21  
22  
23  
24  
25  
26  
27  
28  
29  
30  
31  
32  
33  
34  
35  
36  
37  
38  
39  
40  
41  
42  
43  
44  
45  
46  
47  
48  
49  
50  
51  
52  
53  
54  
55  
56  
57  
58  
59  
60

Table 1 presents the characteristics of the included studies. Cochrane systematic reviews generally focused on the prevention and treatment of specific conditions, whereas 30% of non-Cochrane systematic reviews were categorized with a community-based topic, with a wide range of participants and possible outcomes and a broader range of study settings. Of note, 23% of each, rapid reviews and CRD rapid reviews, were categorized as health system intervention, because they focused on methodological questions or health quality research. We detected noticeable differences when comparing the median AMSTAR scores: Cochrane systematic reviews and CRD rapid reviews showed higher median scores than non-Cochrane systematic reviews and rapid reviews. Where available, we also collected existing AMSTAR ratings from the “health evidence” or “health systems evidence” platforms. For 68% (13/19 study ratings) we found a congruent classification as strong, moderate or weak, respectively (Supplementary File S4). In non-Cochrane reviews information about methodological specifications of included studies were often lacking. As an example, all 30 Cochrane systematic reviews (100%) mentioned a pre-existing review protocol, whereas 7% of non-Cochrane systematic reviews and 13% of rapid reviews did not report any protocol and a considerable amount of non-Cochrane systematic reviews (50%) and rapid reviews (43%) did not clarify if there had been a protocol or not. Similarly, all 30 Cochrane systematic reviews and all but one CRD rapid reviews (97%) included a conflict of interest statement, whereas 40% of non-Cochrane systematic reviews and 27% of rapid reviews lacked such a paragraph. All reviews were funded by national or international governmental or institutional sources. Only one rapid review reported the acceptance of additional funding from a pharmaceutical company. Characteristics of the study population by type of included review are presented in the Supplementary Table S2.

**Table 2****General characteristics of stakeholder involvement (SI) by review type**

|                                                                          | <b>Cochrane<br/>SR (%)<br/>(n=30)</b> | <b>Non-<br/>Cochrane<br/>SR (%)<br/>(n=30)</b> | <b>RR (%)<br/>(n=30)</b> | <b>CRD RR (%)<br/>(n=30)</b> | <b>Total (%)<br/>(N=120)</b> |
|--------------------------------------------------------------------------|---------------------------------------|------------------------------------------------|--------------------------|------------------------------|------------------------------|
| SI mentioned in article                                                  | 2 (7)                                 | 2 (7)                                          | 6 (20)                   | 28 (93)                      | 38 (32)                      |
| SI only mentioned in<br>correspondence                                   | 2 (7)                                 | 4 (13)                                         | 7 (23)                   | 0                            | 13 (11)                      |
| <b>Total SI</b>                                                          | <b>4 (13)</b>                         | <b>6 (20)</b>                                  | <b>13 (43)</b>           | <b>28 (93)</b>               | <b>51 (43)</b>               |
| <b>SI per year</b>                                                       |                                       |                                                |                          |                              |                              |
| 2011                                                                     | 0/5 (0)                               | 0/1 (0)                                        | 0/3 (0)                  | 0/0 (0)                      | 0/9 (0)                      |
| 2012                                                                     | 3/7 (43)                              | 1/5 (20)                                       | 1/3 (33)                 | 0/0 (0)                      | 5/15 (33)                    |
| 2013                                                                     | 0/9 (0)                               | 0/6 (0)                                        | 3/5 (60)                 | 9/10 (90)                    | 12/30 (40)                   |
| 2014                                                                     | 1/7 (14)                              | 3/9 (30)                                       | 6/15 (40)                | 2/3 (67)                     | 12/34 (35)                   |
| 2015                                                                     | 0/2 (0)                               | 2/9 (22)                                       | 3/4 (75)                 | 17/17 (100)                  | 22/32 (69)                   |
| <b>Number of stakeholders<br/>involved per review (%<br/>of SI)</b>      |                                       |                                                |                          |                              |                              |
| 1                                                                        | 2 (50)                                | 2 (33)                                         | 2 (15)                   | 0                            | 6 (12)                       |
| 2-4                                                                      | 1 (25)                                | 1 (17)                                         | 4 (31)                   | 2 (7)                        | 8 (16)                       |
| >4                                                                       | 1 (25)                                | 3 (50)                                         | 4 (31)                   | 26 (93)                      | 34 (67)                      |
| Unspecified                                                              | 0                                     | 0                                              | 3 (23)                   | 0                            | 3 (6)                        |
| <b>Types of stakeholders<br/>(multiple roles possible)<br/>(% of SI)</b> |                                       |                                                |                          |                              |                              |

|                                                     |           |           |           |             |            |
|-----------------------------------------------------|-----------|-----------|-----------|-------------|------------|
| Patients/consumers                                  | 2 (50)    | 0         | 2 (15)    | 5 (18)      | 9 (18)     |
| Professional organisations                          | 1 (25)    | 0         | 0         | 5 (18)      | 6 (12)     |
| Caregivers                                          | 2 (50)    | 0         | 3 (23)    | 23 (82)     | 28 (55)    |
| Researchers                                         | 1 (25)    | 3 (50)    | 2 (15)    | 0           | 6 (12)     |
| Policymakers                                        | 0         | 3 (50)    | 4 (31)    | 3 (11)      | 10 (20)    |
| Unspecified                                         | 0         | 0         | 2 (15)    | 4 (14)      | 6 (12)     |
| <b>Funding source (% of SI)</b>                     |           |           |           |             |            |
| Governmental or institutional funding               | 4 (100)   | 6 (100)   | 13 (100)  | 28 (100)    | 51 (100)   |
| Funding source involved as stakeholder              | 0         | 1 (17)    | 2 (15)    | 0           | 3 (6)      |
| <b>Thematic focus (% per review type per topic)</b> |           |           |           |             |            |
| Prevention                                          | 0/11 (0)  | 0/5 (0)   | 1/4 (25)  | 6/7 (86)    | 7/27 (26)  |
| Treatment                                           | 4/18 (22) | 3/14 (21) | 6/15 (40) | 16/16 (100) | 29/63 (46) |
| Health system                                       | 0/1 (0)   | 1/2 (50)  | 5/7 (71)  | 6/7 (86)    | 12/17 (71) |
| Community-based                                     | 0/0 (0)   | 2/9 (22)  | 1/4 (25)  | 0/0 (0)     | 3/13 (23)  |

CRD: databases of the University of York, Center for Reviews and Dissemination; SR:

systematic review; RR: rapid review; SI: stakeholder involvement

Any stakeholder involvement was mentioned in 13% of Cochrane systematic reviews, 20% of non-Cochrane systematic reviews, 43% of rapid reviews and 93% of CRD rapid reviews.

Except for CRD rapid reviews, where the involvement of stakeholders was routinely reported in the methods or appendix section, about half of the stakeholder involvement was reported in the articles and the other half was confirmed via email by contact authors and remained unmentioned in the reviews. With 67% the email response rate was highest for rapid reviews.

When comparing the amount of stakeholder involvement in different review topics, there were

notable differences: The proportion of stakeholder involvement in reviews focusing on prevention or treatment of specific conditions was lower than in those targeting health system interventions. Interestingly, the proportion of stakeholder involvement has been quite constant between the years 2012 (5/15, 33%) and 2014 (12/34, 34%) even though the amount of rapid reviews has increased exponentially (Table 2). There was, however, a remarkable increase in the proportion of stakeholder involvement for the year 2015 (22/32, 69%), but this was mostly due to the fact that a majority of CRD rapid reviews, which presented the highest proportion of stakeholder involvement, was indexed in 2015.

CRD rapid reviews turned out to have by far the highest proportion of reported stakeholder involvement. The types of stakeholders engaged were listed in the appendix of 26/30 articles, but it was not specified what they had specifically contributed to the review, e.g. if their contribution had affected the final results and conclusions of the reviews (Table 3). One author mentioned in the review that the reason for involving stakeholders was to understand the clinical perspective.

**Table 3**

**Engagement characteristics of stakeholder involvement (SI) by review type**

|                                                          | <b>Cochrane<br/>SR (%)<br/>(n=30)</b> | <b>Non-<br/>Cochrane<br/>SR (%)<br/>(n=30)</b> | <b>RR (%)<br/>(n=30)</b> | <b>CRD RR (%)<br/>(n=30)</b> | <b>Total (%)<br/>(N=120)</b> |
|----------------------------------------------------------|---------------------------------------|------------------------------------------------|--------------------------|------------------------------|------------------------------|
| <b>Stages of SI (multiple stages possible) (% of SI)</b> |                                       |                                                |                          |                              |                              |
| Research question                                        | 1 (25)                                | 1 (17)                                         | 4 (31)                   | 0                            | 6 (12)                       |
| Study characteristics                                    | 0                                     | 0                                              | 6 (46)                   | 0                            | 6 (12)                       |
| Protocol writing                                         | 0                                     | 1 (17)                                         | 2 (15)                   | 0                            | 3 (6)                        |

|                                                                                     |        |        |         |          |         |
|-------------------------------------------------------------------------------------|--------|--------|---------|----------|---------|
| Review process                                                                      | 3 (75) | 1 (17) | 5 (38)  | 0        | 9 (18)  |
| Interpretation of findings                                                          | 0      | 1 (17) | 1 (8)   | 0        | 2 (4)   |
| Result synthesis                                                                    | 0      | 0      | 2 (15)  | 0        | 2 (4)   |
| Multiple or all stages                                                              | 1 (25) | 2 (33) | 1 (8)   | 28 (100) | 32 (63) |
| Unspecified                                                                         | 0      | 2 (33) | 1 (8)   | 0        | 3 (6)   |
| <b>Reasons mentioned for SI (% of SI)</b>                                           |        |        |         |          |         |
| Stakeholder commissioned / requested review                                         | 0      | 1 (17) | 4 (31)  | 0        | 5 (10)  |
| To get consumer feedback                                                            | 1 (25) | 0      | 0       | 0        | 1 (2)   |
| To refine research question                                                         | 1 (25) | 0      | 0       | 0        | 1 (2)   |
| To make the review more relevant for target audience                                | 2 (50) | 0      | 8 (62)  | 0        | 10 (20) |
| To understand clinical perspective                                                  | 0      | 1 (17) | 0       | 1 (4)    | 2 (4)   |
| Unspecified                                                                         | 0      | 4 (67) | 1 (7)   | 27 (96)  | 32 (63) |
| <b>Effect of SI mentioned by authors (% of SI)</b>                                  |        |        |         |          |         |
| Substantial or positive effect                                                      | 2 (50) | 4 (67) | 11 (85) | 0        | 17 (33) |
| Negative effect                                                                     | 0      | 0      | 0       | 0        | 0       |
| No effect mentioned                                                                 | 2 (50) | 2 (33) | 2 (15)  | 28 (100) | 34 (67) |
| Explicit encouragement for involving stakeholders in further studies (% of reviews) | 0      | 1 (3)  | 1 (3)   | 1 (3)    | 3 (2)   |

CRD: databases of the University of York, Center for Reviews and Dissemination; SR:

systematic review; RR: rapid review; SI: stakeholder involvement



1  
2  
3  
4  
5 We detected stakeholder involvement in 43% (13/30) of rapid reviews. In contrast to  
6  
7 CRD rapid reviews, there was usually a small number of stakeholders engaged. They were  
8  
9 involved at different phases, such as determining study characteristics, formulating the research  
10  
11 question, within the review process in general, and less commonly in protocol writing, result  
12  
13 synthesis and the interpretation of findings. One article involved stakeholder throughout all  
14  
15 stages, in one case the phase of involvement was not specified. In total, 85% of the authors  
16  
17 confirmed, that the stakeholders had significantly contributed to the review. Of these, 62%  
18  
19 mentioned that involving stakeholders led to an increased impact of the review and enabled to  
20  
21 focus on the needs of target groups, which made the review more relevant to e.g. patients or  
22  
23 policymakers. Stakeholders had commissioned one third of the rapid reviews or had asked for  
24  
25 evidence. Only two of 13 authors (15%) did not mention any substantial effect. In two cases one  
26  
27 of the funding sources was involved as stakeholder.  
28  
29  
30  
31

32 We identified stakeholder involvement in 20% (6/30) of non-Cochrane systematic  
33  
34 reviews. In four cases the stakeholder involvement was confirmed via email, two articles  
35  
36 mentioned the involvement of stakeholders. Only two types of stakeholders were reported:  
37  
38 policymakers and researchers. If mentioned, all phases of involvement occurred about equally.  
39  
40 A total 67% (4/6) study authors reported significant benefit from the stakeholders' contributions.  
41  
42 One author mentioned that stakeholder supported the researchers to understand different  
43  
44 perspectives of the problem, and 33% (2/6) reported no effect. In one case, the stakeholder was  
45  
46 involved as funding source.  
47  
48  
49  
50  
51

52 Cochrane systematic reviews turned out to be the group with the smallest amount of  
53  
54 stakeholder involvement. All stakeholder engagement was confirmed and specified by email.  
55  
56 The types of stakeholders engaged were patients, caregivers, professional organisations and  
57  
58 researchers. They were mostly involved for providing feedback during the review process, in  
59  
60 one case they contributed in formulating the review question. One review involved stakeholders

1  
2  
3 at all stages. A total of 50% (2/4) of the authors reported substantial benefit, the other 50% (2/4)  
4 reported no significant effect on study results or conclusions. Two authors had involved  
5 stakeholders to make the review more relevant for its target audience, one author claimed that  
6 stakeholders helped him to refine the research question. One author involved stakeholders to  
7 get direct consumer feedback before publishing the review. No stakeholders were involved in  
8 funding.  
9  
10  
11  
12  
13  
14  
15  
16  
17

## 18 **DISCUSSION**

19  
20 The involvement of stakeholders varies by review type. Our findings suggest that rapid  
21 reviews tend to involve stakeholders more than twice as frequently than systematic reviews. On  
22 average, they also involved a greater number of stakeholders per review. In addition, we  
23 detected considerable differences in the phases in which stakeholders were involved. Rapid  
24 reviews involved them at very early stages of the review process, such as determining the  
25 intentional study characteristics or formulating the research question. Furthermore, it seemed to  
26 be much more common for policymakers, who were the most frequent group of stakeholders  
27 involved in rapid reviews, or other stakeholder groups, to substantially contribute to rapid  
28 reviews than to systematic reviews.  
29  
30  
31  
32  
33  
34  
35  
36  
37  
38

39 Of note, the majority of rapid and non-Cochrane systematic review authors reported that  
40 the involved stakeholders had positive and considerable effects on the study results, making the  
41 review more relevant for the targeted audience. However, the minority of rapid and non-  
42 Cochrane systematic review authors reporting no effect of stakeholder involvement on the  
43 review process, may illustrate that the stakeholders' contribution to non-Cochrane systematic  
44 reviews was seen as an additional and welcomed feature to the review, but not as a substantial  
45 part. This shows the importance that within and between review types an information and  
46 experiences exchange between researchers could benefit the stakeholder engagement.  
47  
48  
49  
50  
51  
52  
53  
54  
55  
56  
57

58 A strength of this study is to provide an overview with its rather low amount of  
59  
60

1  
2  
3 stakeholder engagement in the assessed review types despite known benefits regarding the  
4 use of evidence in policy and practice. With respect to the different procedures used by review  
5 types, the reported experiences of stakeholder engagement, e.g. in rapid reviews, could further  
6 benefit and facilitate stakeholder engagement in other review types, for example in systematic  
7 reviews.  
8  
9  
10  
11  
12

13 One limitation of this study is the low response rate to our emails by contact authors.  
14 Given the fact that nearly half of our emails to study authors remained unanswered or could not  
15 be sent, the rate of unmentioned stakeholder involvement might still be higher than our numbers  
16 suggest. Of note, there was no considerable difference between systematic reviews and rapid  
17 reviews in the percentage of unmentioned stakeholder involvement.  
18  
19  
20  
21  
22  
23

24 Although when using a broad definition of the term “stakeholder” including everyone with  
25 a particular interest in the research topic (but who are not members of the primary research  
26 team), this term was not consistently used by contact authors. In their emails, some authors  
27 listed peer reviewers as stakeholders or one author erroneously mentioned members of the  
28 research team, who performed literature research and data extraction as stakeholders. In  
29 addition, interdisciplinary knowledge exchange is an important part of evidence-based research,  
30 but there is a difference whether experts from other fields were included as researchers in the  
31 study team or whether they were considered as stakeholders. We did not count any experts or  
32 peer reviewers as stakeholders, Furthermore, discussion is needed, whether the funding body  
33 of a review might contribute as a stakeholder and how a potentially associated conflict of  
34 interest could be avoided.  
35  
36  
37  
38  
39  
40  
41  
42  
43  
44  
45  
46  
47  
48  
49

50 The reported involvement of stakeholders corresponded with Cottrell et al. who  
51 mentioned that stakeholders might contribute to different study types and evidence phases.[142]  
52 Based upon, Keown et al.[143] concluded, that stakeholder involvement led to an increased  
53 relevance and depth of review findings, more clarity in defining research questions, broader  
54 dissemination of their results and increased awareness of target groups. Although they  
55 mentioned that this engagement process required flexibility and might be resource- and time-  
56  
57  
58  
59  
60

1  
2  
3 intensive, they nevertheless concluded that involving stakeholders facilitated implementation  
4  
5 and should be indispensable for future research.  
6  
7  
8

9  
10 Although the overall proportion of stakeholder involvement has not yet increased  
11 prominently in the past few years, there have still been considerable efforts in creating  
12 standardized procedures for involving stakeholders in evidence synthesis. Keown et al.  
13 identified five opportunities in the systematic review process, where potential stakeholders could  
14 be engaged on a regular base.[143] The CRD rapid reviews included were mainly performed by  
15 Health Quality Ontario (Canada) and routinely held expert panels, including physicians,  
16 caregivers and sometimes, consumer representatives and professional organisations. The fact  
17 that they included stakeholders on a regular basis might confirm, what Keown et al [143] had  
18 already suggested: the engagement of audience members interested in or affected by the  
19 investigated topic definitively resulted in more benefits than limitations. We, therefore, suggest  
20 that future researcher involve stakeholders more broadly in the process of evidence synthesis,  
21 to increase the relevance and acceptance of the knowledge transfer. One example of an  
22 organisation ensuring that stakeholders are involved in research is the James Lind Alliance  
23 (<http://www.jla.nihr.ac.uk>).  
24  
25  
26  
27  
28  
29  
30  
31  
32  
33  
34  
35  
36  
37  
38

39 In future, the reporting of stakeholder involvement should be improved and its effects  
40 better evaluated and communicated. Stakeholder engagement could also be included in  
41 reporting checklists of all review types.  
42  
43  
44  
45  
46  
47  
48

## 49 **ACKNOWLEDGEMENT**

50  
51 We are indebted to Julia Kreis and Aline Flatz for reviewing the protocol and our thanks go to  
52 Sarah Haile for generating the random lists. Parts of this work have been presented at the  
53 Global Evidence Summit September 2017 in Cape Town, SA.  
54  
55  
56  
57  
58  
59  
60

**Contributors** All authors conceived and designed the study. JF collected and interpreted the

1  
2  
3 data and essentially contributed to the writing of the manuscript. MP and MM supervised the  
4 overall research and critically revised the manuscript. All authors approved the final manuscript.  
5  
6

7 **Funding** This research received no specific grant from any funding agency in the public,  
8 commercial or not-for-profit sectors.  
9

10  
11 **Competing interests** None declared.  
12

13 **Patient consent** Not required.  
14

15 **Provenance and peer review** Not commissioned; externally peer reviewed.  
16

17 **Data sharing statement** No additional data are available.  
18  
19  
20  
21  
22  
23

## 24 **Legend Figure 1**

### 25 **Flow diagram of study selection.**

26  
27  
28 CRD: Databases of the University of York, Center for Reviews and Dissemination; RR: rapid  
29 review; SR: systematic review  
30  
31  
32  
33  
34  
35  
36  
37  
38  
39  
40  
41  
42  
43  
44  
45  
46  
47  
48  
49  
50  
51  
52  
53  
54  
55  
56  
57  
58  
59  
60

## REFERENCES

1. Khangura S, Konnyu K, Cushman R, Grimshaw J, Moher D. Evidence summaries: the evolution of a rapid review approach. *Syst Rev*. 2012;1:10. doi: 10.1186/2046-4053-1-10. PubMed PMID: 22587960; PubMed Central PMCID: PMC3351736.
2. Page MJ, Shamseer L, Altman DG, Tetzlaff J, Sampson M, Tricco AC, et al. Epidemiology and Reporting Characteristics of Systematic Reviews of Biomedical Research: A Cross-Sectional Study. *PLoS Med*. 2016;13(5):e1002028. doi: 10.1371/journal.pmed.1002028. PubMed PMID: 27218655; PubMed Central PMCID: PMC4878797.
3. Jadad AR, Cook DJ, Jones A, Klassen TP, Tugwell P, Moher M, et al. Methodology and reports of systematic reviews and meta-analyses - A comparison of COCHRANE reviews with articles published in paper-based journals. *Jama-Journal of the American Medical Association*. 1998;280(3):278-80. doi: DOI 10.1001/jama.280.3.278. PubMed PMID: WOS:000074706000026.
4. Hopewell S, Clarke M, Lefebvre C, Scherer R. Handsearching versus electronic searching to identify reports of randomized trials. *Cochrane Database Syst Rev*. 2007;(2):MR000001. doi: 10.1002/14651858.MR000001.pub2. PubMed PMID: 17443625.
5. Ganann R, Ciliska D, Thomas H. Expediting systematic reviews: methods and implications of rapid reviews. *Implement Sci*. 2010;5:56. doi: 10.1186/1748-5908-5-56. PubMed PMID: 20642853; PubMed Central PMCID: PMC2914085.
6. Watt A, Cameron A, Sturm L, Lathlean T, Babidge W, Blamey S, et al. Rapid versus full systematic reviews: validity in clinical practice? *ANZ J Surg*. 2008;78(11):1037-40. doi: 10.1111/j.1445-2197.2008.04730.x. PubMed PMID: 18959712.
7. Tricco AC, Antony J, Zarin W, Striffler L, Ghassemi M, Ivory J, et al. A scoping review of rapid review methods. *BMC Med*. 2015;13:224. doi: 10.1186/s12916-015-0465-6. PubMed PMID: 26377409; PubMed Central PMCID: PMC4574114.
8. Watt A, Cameron A, Sturm L, Lathlean T, Babidge W, Blamey S, et al. Rapid reviews versus full systematic reviews: an inventory of current methods and practice in health technology assessment. *Int J Technol Assess Health Care*. 2008;24(2):133-9. doi: 10.1017/S0266462308080185. PubMed PMID: 18400114.
9. Hailey DM. Health technology assessment in Canada: diversity and evolution. *Med J Aust*. 2007;187(5):286-8. PubMed PMID: 17767434.
10. Mallery C, Ganachari D, Fernandez J, Smeeding L, Robinson S, Moon M, et al. Innovative Methods in Stakeholder Engagement: An Environmental Scan. Rockville, MD: Agency for Healthcare Research and Quality; May 2012. <http://www.effectivehealthcare.ahrq.gov/index.cfm/tools-and-resources/how-to-get-involved-in-the-effective-health-care-program/>: 2012.
11. Concannon TW, Fuster M, Saunders T, Patel K, Wong JB, Leslie LK, et al. A systematic review of stakeholder engagement in comparative effectiveness and patient-centered outcomes research. *J Gen Intern Med*. 2014;29(12):1692-701. doi: 10.1007/s11606-014-2878-x. PubMed PMID: 24893581; PubMed Central PMCID: PMC4242886.
12. Boote J, Wong R, Booth A. 'Talking the talk or walking the walk?' A bibliometric review of the literature on public involvement in health research published between 1995 and 2009. *Health Expect*. 2015;18(1):44-57. doi: 10.1111/hex.12007. PubMed PMID: 23033933; PubMed Central PMCID: PMC45060762.
13. Kreis J, Puhan MA, Schunemann HJ, Dickersin K. Consumer involvement in systematic reviews of comparative effectiveness research. *Health Expect*. 2013;16(4):323-37. doi:

- 10.1111/j.1369-7625.2011.00722.x. PubMed PMID: 22390732; PubMed Central PMCID: PMC5060681.
14. Morley RF, Norman G, Golder S, Griffith P. A systematic scoping review of the evidence for consumer involvement in organisations undertaking systematic reviews: focus on Cochrane. *Res Involv Engagem*. 2016;2:36. doi: 10.1186/s40900-016-0049-4. PubMed PMID: 29507770; PubMed Central PMCID: PMC5831869.
  15. Lohr KN, Steinwachs DM. Health services research: an evolving definition of the field. *Health Serv Res*. 2002;37(1):7-9. PubMed PMID: 11949927.
  16. R Core Team. R: A language and environment for statistical computing. Vienna, Austria. URL <https://www.R-project.org/2018>.
  17. Pollock A, Campbell P, Struthers C, Synnot A, Nunn J, Hill S, et al. Stakeholder involvement in systematic reviews: a protocol for a systematic review of methods, outcomes and effects. *Res Involv Engagem*. 2017;3:9. doi: 10.1186/s40900-017-0060-4. PubMed PMID: 29062534; PubMed Central PMCID: PMC5611627.
  18. Shea BJ, Grimshaw JM, Wells GA, Boers M, Andersson N, Hamel C, et al. Development of AMSTAR: a measurement tool to assess the methodological quality of systematic reviews. *BMC Med Res Methodol*. 2007;7:10. doi: 10.1186/1471-2288-7-10. PubMed PMID: 17302989; PubMed Central PMCID: PMC1810543.
  19. McMaster University Hamilton (Canada) Health Evidence 2016 <http://www.healthevidence.org> Accessed 06.04.2016.
  20. Mc Master Health Forum (McMaster University Hamilton (Canada)) Health Systems Evidence 2016 <https://www.healthsystemsevidence.org> Accessed 06.04.2016.
  21. Moher D, Liberati A, Tetzlaff J, Altman DG, Grp P. Preferred Reporting Items for Systematic Reviews and Meta-Analyses: The PRISMA Statement. *Journal of Clinical Epidemiology*. 2009;62(10):1006-12. doi: 10.1016/j.jclinepi.2009.06.005. PubMed PMID: WOS:000270250500003.
  22. Akl Elie A, Oxman Andrew D, Herrin J, Vist Gunn E, Terrenato I, Sperati F, et al. Framing of health information messages. *Cochrane Database of Systematic Reviews [Internet]*. 2011; (12). Available from: <http://onlinelibrary.wiley.com/doi/10.1002/14651858.CD006777.pub2/abstract>.
  23. Bjelakovic G, Gluud Lise L, Nikolova D, Whitfield K, Krstic G, Wetterslev J, et al. Vitamin D supplementation for prevention of cancer in adults. *Cochrane Database of Systematic Reviews [Internet]*. 2014; (6). Available from: <http://onlinelibrary.wiley.com/doi/10.1002/14651858.CD007469.pub2/abstract>.
  24. Carney T, Myers Bronwyn J, Louw J, Okwundu Charles I. Brief school-based interventions and behavioural outcomes for substance-using adolescents. *Cochrane Database of Systematic Reviews [Internet]*. 2014; (2). Available from: <http://onlinelibrary.wiley.com/doi/10.1002/14651858.CD008969.pub2/abstract>.
  25. Chen W, Zhang Y, Li X, Yang G, Liu Jian P. Chinese herbal medicine for diabetic peripheral neuropathy. *Cochrane Database of Systematic Reviews [Internet]*. 2013; (10). Available from: <http://onlinelibrary.wiley.com/doi/10.1002/14651858.CD007796.pub3/abstract>.
  26. Cheuk Daniel KL, Chiang Alan KS, Lee Tsz L, Chan Godfrey CF, Ha Shau Y. Vaccines for prophylaxis of viral infections in patients with hematological malignancies. *Cochrane Database of Systematic Reviews [Internet]*. 2011; (3). Available from: <http://onlinelibrary.wiley.com/doi/10.1002/14651858.CD006505.pub2/abstract>.
  27. Fede G, Germani G, Gluud C, Gurusamy Kurinchi S, Burroughs Andrew K. Propylthiouracil for alcoholic liver disease. *Cochrane Database of Systematic Reviews [Internet]*. 2011; (6).



- Available from:  
<http://onlinelibrary.wiley.com/doi/10.1002/14651858.CD002800.pub3/abstract>.
28. Fonner Virginia A, Denison J, Kennedy Caitlin E, O'Reilly K, Sweat M. Voluntary counseling and testing (VCT) for changing HIV-related risk behavior in developing countries. Cochrane Database of Systematic Reviews [Internet]. 2012; (9). Available from: <http://onlinelibrary.wiley.com/doi/10.1002/14651858.CD001224.pub4/abstract>.
  29. Garrison Scott R, Allan GM, Sekhon Ravneet K, Musini Vijaya M, Khan Karim M. Magnesium for skeletal muscle cramps. Cochrane Database of Systematic Reviews [Internet]. 2012; (9). Available from: <http://onlinelibrary.wiley.com/doi/10.1002/14651858.CD009402.pub2/abstract>.
  30. Jefferson T, Rivetti A, Di Pietrantonj C, Demicheli V, Ferroni E. Vaccines for preventing influenza in healthy children. Cochrane Database of Systematic Reviews [Internet]. 2012; (8). Available from: <http://onlinelibrary.wiley.com/doi/10.1002/14651858.CD004879.pub4/abstract>.
  31. Jin H, Leng Q, Li C. Dietary flavonoid for preventing colorectal neoplasms. Cochrane Database of Systematic Reviews [Internet]. 2012; (8). Available from: <http://onlinelibrary.wiley.com/doi/10.1002/14651858.CD009350.pub2/abstract>.
  32. Jorge Eliane C, Jorge Edson N, El Dib Regina P. Early light reduction for preventing retinopathy of prematurity in very low birth weight infants. Cochrane Database of Systematic Reviews [Internet]. 2013; (8). Available from: <http://onlinelibrary.wiley.com/doi/10.1002/14651858.CD000122.pub2/abstract>.
  33. Junker Anders E, Als-Nielsen B, Gluud C, Gluud Lise L. Dopamine agents for hepatic encephalopathy. Cochrane Database of Systematic Reviews [Internet]. 2014; (2). Available from: <http://onlinelibrary.wiley.com/doi/10.1002/14651858.CD003047.pub3/abstract>.
  34. Karmali Kunal N, Davies P, Taylor F, Beswick A, Martin N, Ebrahim S. Promoting patient uptake and adherence in cardiac rehabilitation. Cochrane Database of Systematic Reviews [Internet]. 2014; (6). Available from: <http://onlinelibrary.wiley.com/doi/10.1002/14651858.CD007131.pub3/abstract>.
  35. Kwong Joey SW, Lau Hoi Lam C, Yeung F, Chau Pui H. Yoga for secondary prevention of coronary heart disease. Cochrane Database of Systematic Reviews [Internet]. 2015; (7). Available from: <http://onlinelibrary.wiley.com/doi/10.1002/14651858.CD009506.pub4/abstract>.
  36. Lager Kate E, Mistri Amit K, Khunti K, Haunton Victoria J, Sett Aung K, Wilson Andrew D. Interventions for improving modifiable risk factor control in the secondary prevention of stroke. Cochrane Database of Systematic Reviews [Internet]. 2014; (5). Available from: <http://onlinelibrary.wiley.com/doi/10.1002/14651858.CD009103.pub2/abstract>.
  37. Martí-Carvajal Arturo J, Knight-Madden Jennifer M, Martínez-Zapata Maria J. Interventions for treating leg ulcers in people with sickle cell disease. Cochrane Database of Systematic Reviews [Internet]. 2014; (12). Available from: <http://onlinelibrary.wiley.com/doi/10.1002/14651858.CD008394.pub3/abstract>.
  38. Moi JH, Sriranganathan MK, Edwards CJ, Buchbinder R. Lifestyle interventions for acute gout. Cochrane Database Syst Rev. 2013;(11):CD010519. doi: 10.1002/14651858.CD010519.pub2. PubMed PMID: 24186771.
  39. Nava F, Ghilotti F, Maggi L, Hatemi G, Del Bianco A, Merlo C, et al. Biologics, colchicine, corticosteroids, immunosuppressants and interferon-alpha for Neuro-Behçet's Syndrome. Cochrane Database of Systematic Reviews [Internet]. 2014; (12). Available from:

- 1  
2  
3 <http://onlinelibrary.wiley.com/doi/10.1002/14651858.CD010729.pub2/abstract>.
- 4 40. Njei B, Kongnyuy Eugene J, Kumar S, Okwen Mbah P, Sankar Mari J, Mbuagbaw L. Optimal  
5 timing for antiretroviral therapy initiation in patients with HIV infection and concurrent  
6 cryptococcal meningitis. Cochrane Database of Systematic Reviews [Internet]. 2013; (2).  
7 Available from:  
8 <http://onlinelibrary.wiley.com/doi/10.1002/14651858.CD009012.pub2/abstract>.
- 9  
10 41. Okwundu Charles I, Nagpal S, Musekiwa A, Sinclair D. Home- or community-based  
11 programmes for treating malaria. Cochrane Database of Systematic Reviews [Internet].  
12 2013; (5). Available from:  
13 <http://onlinelibrary.wiley.com/doi/10.1002/14651858.CD009527.pub2/abstract>.
- 14  
15 42. Olsen O, Clausen Jette A. Planned hospital birth versus planned home birth. Cochrane  
16 Database of Systematic Reviews [Internet]. 2012; (9). Available from:  
17 <http://onlinelibrary.wiley.com/doi/10.1002/14651858.CD000352.pub2/abstract>.
- 18  
19 43. Overdeest Gijsbert M, Jacobs W, Vleggeert-Lankamp C, Thomé C, Gunzburg R, Peul W.  
20 Effectiveness of posterior decompression techniques compared with conventional  
21 laminectomy for lumbar stenosis. Cochrane Database of Systematic Reviews [Internet].  
22 2015; (3). Available from:  
23 <http://onlinelibrary.wiley.com/doi/10.1002/14651858.CD010036.pub2/abstract>.
- 24  
25 44. Peckham Emily J, Nelson EA, Greenhalgh J, Cooper K, Roberts ER, Agrawal A. Homeopathy  
26 for treatment of irritable bowel syndrome. Cochrane Database of Systematic Reviews  
27 [Internet]. 2013; (11). Available from:  
28 <http://onlinelibrary.wiley.com/doi/10.1002/14651858.CD009710.pub2/abstract>.
- 29  
30 45. Rahimi-Movaghar A, Amin-Esmaeili M, Hefazi M, Yousefi-Nooraie R. Pharmacological  
31 therapies for maintenance treatments of opium dependence. Cochrane Database of  
32 Systematic Reviews [Internet]. 2013; (1). Available from:  
33 <http://onlinelibrary.wiley.com/doi/10.1002/14651858.CD007775.pub2/abstract>.
- 34  
35 46. Shields L, Zhou H, Pratt J, Taylor M, Hunter J, Pascoe E. Family-centred care for  
36 hospitalised children aged 0-12 years. Cochrane Database of Systematic Reviews  
37 [Internet]. 2012; (10). Available from:  
38 <http://onlinelibrary.wiley.com/doi/10.1002/14651858.CD004811.pub3/abstract>.
- 39  
40 47. Smart Neil A, Marshall Belinda J, Daley M, Boulos E, Windus J, Baker N, et al. Low-fat diets  
41 for acquired hypercholesterolaemia. Cochrane Database of Systematic Reviews [Internet].  
42 2011; (2). Available from:  
43 <http://onlinelibrary.wiley.com/doi/10.1002/14651858.CD007957.pub2/abstract>.
- 44  
45 48. Taylor F, Huffman Mark D, Macedo Ana F, Moore Theresa HM, Burke M, Davey Smith G,  
46 et al. Statins for the primary prevention of cardiovascular disease. Cochrane Database of  
47 Systematic Reviews [Internet]. 2013; (1). Available from:  
48 <http://onlinelibrary.wiley.com/doi/10.1002/14651858.CD004816.pub5/abstract>.
- 49  
50 49. Taylor Matthew J, Rudkin L, Bullemor-Day P, Lubin J, Chukwujekwu C, Hawton K.  
51 Strategies for managing sexual dysfunction induced by antidepressant medication.  
52 Cochrane Database of Systematic Reviews [Internet]. 2013; (5). Available from:  
53 <http://onlinelibrary.wiley.com/doi/10.1002/14651858.CD003382.pub3/abstract>.
- 54  
55 50. Tejani Aaron M, Wasdell M, Spiwak R, Rowell G, Nathwani S. Carnitine for fatigue in  
56 multiple sclerosis. Cochrane Database of Systematic Reviews [Internet]. 2012; (5).  
57 Available from:  
58 <http://onlinelibrary.wiley.com/doi/10.1002/14651858.CD007280.pub3/abstract>.
- 59  
60 51. Thomas Roger E, Lorenzetti D, Spragins W. Mentoring adolescents to prevent drug and

- 1  
2  
3 alcohol use. Cochrane Database of Systematic Reviews [Internet]. 2011; (11). Available  
4 from: <http://onlinelibrary.wiley.com/doi/10.1002/14651858.CD007381.pub2/abstract>.
52. Agarwal R, Goldenberg M, Perry R, IsHak WW. The quality of life of adults with attention  
6 deficit hyperactivity disorder: a systematic review. *Innov Clin Neurosci*. 2012;9(5-6):10-21.  
7 PubMed PMID: 22808445; PubMed Central PMCID: PMCPMC3398685.
- 8 53. Ahmed AA, Alsharief E, Alsharief A. Intensive versus conventional glycemic control: What  
9 is best for patients with type 2 diabetes? *Diabetes and Metabolic Syndrome: Clinical*  
10 *Research and Reviews*. 2013;7(1):48-51.
- 11 54. Albrecht B, Staiger PK, Hall K, Miller P, Best D, Lubman DI. Benzodiazepine use and  
12 aggressive behaviour: A systematic review. *Australian and New Zealand Journal of*  
13 *Psychiatry*. 2014;48(12):1096-114.
- 14 55. Bak A, Browne J, Loveday HP, Tsiami A. Systematic review of nutritional interventions to  
15 prevent healthcare-associated infections in undernourished elderly. *Proceedings of the*  
16 *Nutrition Society*. 2013;72:E212.
- 17 56. Blasco MA, Redleaf MI. Cochlear implantation in unilateral sudden deafness improves  
18 tinnitus and speech comprehension: meta-analysis and systematic review. *Otology &*  
19 *neurotology* : official publication of the American Otological Society, American  
20 *Neurotology Society [and] European Academy of Otology and Neurotology*.  
21 2014;35(8):1426-32.
- 22 57. Bourke L, Homer KE, Thaha MA, Steed L, Rosario DJ, Robb KA, et al. Interventions to  
23 improve exercise behaviour in sedentary people living with and beyond cancer: A  
24 systematic review. *British Journal of Cancer*. 2014;110(4):831-41.
- 25 58. Chien TJ, Liu CY, Chang YF, Fang CJ, Hsu CH. Acupuncture for treating aromatase inhibitor-  
26 related arthralgia in breast cancer: a systematic review and meta-analysis. *Journal of*  
27 *Alternative & Complementary Medicine*. 2015;21(5):251-60. PubMed PMID: 25915433.
- 28 59. Collins CE, Burrows TL, Bray J, Asher R, Young M, Morgan PJ. Effectiveness of parent-  
29 centred interventions for the prevention and treatment of childhood overweight and  
30 obesity in community settings: A systematic review. *JBIC Database of Systematic Reviews*  
31 *and Implementation Reports*. 2013;11(9):180-257.
- 32 60. Foersch M, Jacobs C, Wriedt S, Hechtner M, Wehrbein H. Effectiveness of maxillary  
33 protraction using facemask with or without maxillary expansion: a systematic review and  
34 meta-analysis. *Clinical Oral Investigations*. 2015;19(6):1181-92. doi: 10.1007/s00784-015-  
35 1478-4. PubMed PMID: 25982454.
- 36 61. Gibbs M, Winsper C, Marwaha S, Gilbert E, Broome M, Singh SP. Cannabis use and mania  
37 symptoms: A systematic review and meta-analysis. *European Psychiatry*. 2015;30:1128.
- 38 62. Guerin M, Grimmer K, Kumar S. Community services' involvement in the discharge of  
39 older adults from hospital into the community. *International Journal Of Integrated Care*.  
40 2013;13:e032-e. PubMed PMID: 24179455.
- 41 63. Hu MB, Xu H, Bai PD, Jiang HW, Ding Q. Obesity has multifaceted impact on biochemical  
42 recurrence of prostate cancer: A dose-response meta-analysis of 36,927 patients. *Medical*  
43 *Oncology*. 2014;31(2).
- 44 64. Johantgen M, Fountain L, Zangaro G, Newhouse R, Stanik-Hutt J, White K. Comparison of  
45 labor and delivery care provided by certified nurse-midwives and physicians: a systematic  
46 review, 1990 to 2008. *Womens Health Issues*. 2012;22(1):e73-81. PubMed PMID:  
47 21865056.
- 48 65. Lankhaar JA, de Vries WR, Jansen JA, Zelissen PM, Backx FJ. Impact of overt and  
49 subclinical hypothyroidism on exercise tolerance: a systematic review. *Research Quarterly*  
50  
51  
52  
53  
54  
55  
56  
57  
58  
59  
60

- 1  
2  
3 for Exercise & Sport. 2014;85(3):365-89. PubMed PMID: 25141089.
- 4 66. Llewellyn A, Simmonds M, Owen CG, Woolacott N. Childhood obesity as a predictor of  
5 morbidity in adulthood: a systematic review and meta-analysis. *Obesity Reviews: An*  
6 *Official Journal Of The International Association For The Study Of Obesity*. 2015. doi:  
7 10.1111/obr.12316. PubMed PMID: 26440472.
- 8 67. Maglione MA, Das L, Raaen L, Smith A, Chari R, Newberry S, et al. Safety of vaccines used  
9 for routine immunization of US children: A systematic review. *Pediatrics*.  
10 2014;134(2):325-37.
- 11 68. Matsuda A, Yamaoka K, Tango T, Matsuda T, Nishimoto H. Effectiveness of  
12 psychoeducational support on quality of life in early-stage breast cancer patients: a  
13 systematic review and meta-analysis of randomized controlled trials. *Quality of life*  
14 *research : an international journal of quality of life aspects of treatment, care and*  
15 *rehabilitation*. 2014;23(1):21-30.
- 16 69. Panagioti M, Gooding PA, Triantafyllou K, Tarrier N. Suicidality and posttraumatic stress  
17 disorder (PTSD) in adolescents: a systematic review and meta-analysis. *Social Psychiatry*  
18 *And Psychiatric Epidemiology*. 2015;50(4):525-37. doi: 10.1007/s00127-014-0978-x.  
19 PubMed PMID: 25398198.
- 20 70. Rodgers M, Asaria M, Walker S, McMillan D, Lucock M, Harden M, et al. The clinical  
21 effectiveness and cost-effectiveness of low-intensity psychological interventions for the  
22 secondary prevention of relapse after depression: A systematic review. *Health*  
23 *Technology Assessment*. 2012;16(28):1-129.
- 24 71. Rolka EJ, Silverman MJ. A systematic review of music and dyslexia. *Arts in Psychotherapy*.  
25 2015;46:24-32.
- 26 72. Rozet F, Bastide C, Beuzeboc P, Cormier L, Fromont G, Hennequin C, et al. Prise en charge  
27 des tumeurs de la prostate a faible risque evolutif. *Progres en Urologie*. 2015;25(1):1-10.  
28 PubMed PMID: 25454776.
- 29 73. Rush CJ, Campbell RT, Jhund PS, Connolly EC, Preiss D, Gardner RS, et al. Falling  
30 Cardiovascular Mortality in Heart Failure With Reduced Ejection Fraction and Implications  
31 for Clinical Trials. *JACC: Heart Failure*. 2015;3(8):603-14.
- 32 74. Scott IC, Tan R, Stahl D, Steer S, Lewis CM, Cope AP. The protective effect of alcohol on  
33 developing rheumatoid arthritis: A systematic review and meta-analysis. *Rheumatology*  
34 *(United Kingdom)*. 2013;52(5):856-67.
- 35 75. Siffredi V, Anderson V, Leventer RJ, Spencer-Smith MM. Neuropsychological profile of  
36 agenesis of the corpus callosum: A systematic review. *Developmental Neuropsychology*.  
37 2013;38(1):36-57.
- 38 76. Sipe TA, Finnie RKC, Knopf JA, Qu S, Reynolds JA, Thota AB, et al. Effects of mental health  
39 benefits legislation: A community guide systematic review. *American Journal of*  
40 *Preventive Medicine*. 2015;48(6):755-66.
- 41 77. Te Morenga L, Mallard S, Mann J. Dietary sugars and body weight: systematic review and  
42 meta-analyses of randomised controlled trials and cohort studies. *BMJ (Clinical Research*  
43 *Ed)*. 2012;346:e7492-e. doi: 10.1136/bmj.e7492. PubMed PMID: 23321486.
- 44 78. Tricco AC, Antony J, Khan PA, Ghassemi M, Hamid JS, Ashoor H, et al. Safety and  
45 effectiveness of dipeptidyl peptidase-4 inhibitors versus intermediate-acting insulin or  
46 placebo for patients with type 2 diabetes failing two oral antihyperglycaemic agents: a  
47 systematic review and network meta-analysis. *BMJ Open*. 2014;4(12):e005752. PubMed  
48 PMID: 25537781.
- 49 79. Vasconcellos F, Seabra A, Katzmarzyk PT, Kraemer-Aguiar LG, Bouskela E, Farinatti P.
- 50  
51  
52  
53  
54  
55  
56  
57  
58  
59  
60



- 1  
2  
3 Physical activity in overweight and obese adolescents: systematic review of the effects on  
4 physical fitness components and cardiovascular risk factors. *Sports medicine (Auckland,*  
5 *NZ)*. 2014;44(8):1139-52.  
6  
7 80. Wang Z. Age-dependent decline of association between obesity and mortality: A  
8 systematic review and meta-analysis. *Obesity Research and Clinical Practice*. 2015;9(1):1-  
9 11.  
10 81. Wu S, Cohen D, Shi Y, Pearson M, Sturm R. Economic analysis of physical activity  
11 interventions. *American Journal of Preventive Medicine*. 2011;40(2):149-58.  
12 82. Sedation and Anesthesia Options for Diagnostic Procedures: A Review of Clinical  
13 Effectiveness and Guidelines. 2015. PubMed PMID: 26180868.  
14 83. Attree P, French B, Milton B, Povall S, Whitehead M, Popay J. The experience of  
15 community engagement for individuals: a rapid review of evidence. *Health & Social Care*  
16 *In The Community*. 2011;19(3):250-60. doi: 10.1111/j.1365-2524.2010.00976.x. PubMed  
17 PMID: 21138495.  
18 84. Barry MM, D'Eath M, Sixsmith J. Interventions for improving population health literacy:  
19 insights from a rapid review of the evidence. *Journal Of Health Communication*.  
20 2013;18(12):1507-22. doi: 10.1080/10810730.2013.840699. PubMed PMID: 24298885.  
21 85. Beall RF, Baskerville N, Golfam M, Saeed S, Little J. Modes of delivery in preventive  
22 intervention studies: A rapid review. *European Journal of Clinical Investigation*.  
23 2014;44(7):688-96.  
24 86. Beck CR, Sokal R, Arunachalam N, Puleston R, Cichowska A, Kessel A, et al. Neuraminidase  
25 inhibitors for influenza: a review and public health perspective in the aftermath of the  
26 2009 pandemic. *Influenza And Other Respiratory Viruses*. 2013;7 Suppl 1:14-24. doi:  
27 10.1111/irv.12048. PubMed PMID: 23279893.  
28 87. Boyce T, Holmes A. Addressing Health Inequalities in the Delivery of the Human  
29 Papillomavirus Vaccination Programme: Examining the Role of the School Nurse. *PLoS*  
30 *ONE*. 2012;7(9).  
31 88. Brunton G, Paraskeva N, Caird J, Bird KS, Kavanagh J, Kwan I, et al. Psychosocial  
32 predictors, assessment, and outcomes of cosmetic procedures: a systematic rapid  
33 evidence assessment. *Aesthetic Plastic Surgery*. 2014;38(5):1030-40. doi:  
34 10.1007/s00266-014-0369-4. PubMed PMID: 24962402.  
35 89. Butow P, Price MA, Shaw JM, Turner J, Clayton JM, Grimison P, et al. Clinical pathway for  
36 the screening, assessment and management of anxiety and depression in adult cancer  
37 patients: Australian guidelines. *Psycho-Oncology*. 2015;24(9):987-1001.  
38 90. Costello RB, Lentino CV, Boyd CC, O'Connell ML, Crawford CC, Sprengel ML, et al. The  
39 effectiveness of melatonin for promoting healthy sleep: A rapid evidence assessment of  
40 the literature. *Nutrition Journal*. 2014:106.  
41 91. Crawford C, Lee C, Bingham J, Buckenmaier CC, Crawford P, Delgado R, et al. Sensory art  
42 therapies for the self-management of chronic pain symptoms. *Pain Medicine (United*  
43 *States)*. 2014;15(S1):S66-S75.  
44 92. Crawford C, Lee C, May T, Buckenmaier CC, Crawford P, Delgado R, et al. Physically  
45 oriented therapies for the self-management of chronic pain symptoms. *Pain Medicine*  
46 *(United States)*. 2014;15(S1):S54-S65.  
47 93. Dorresteyn PM, Ipenburg NA, Murphy KJ, Smit M, Van Vulpen JK, Wegner I, et al. Rapid  
48 systematic review of normal audiometry results as a predictor for benign paroxysmal  
49 positional vertigo. *Otolaryngology - Head and Neck Surgery (United States)*.  
50 2014;150(6):919-24.  
51  
52  
53  
54  
55  
56  
57  
58  
59  
60

- 1
  - 2
  - 3
  - 4
  - 5
  - 6
  - 7
  - 8
  - 9
  - 10
  - 11
  - 12
  - 13
  - 14
  - 15
  - 16
  - 17
  - 18
  - 19
  - 20
  - 21
  - 22
  - 23
  - 24
  - 25
  - 26
  - 27
  - 28
  - 29
  - 30
  - 31
  - 32
  - 33
  - 34
  - 35
  - 36
  - 37
  - 38
  - 39
  - 40
  - 41
  - 42
  - 43
  - 44
  - 45
  - 46
  - 47
  - 48
  - 49
  - 50
  - 51
  - 52
  - 53
  - 54
  - 55
  - 56
  - 57
  - 58
  - 59
  - 60
94. Geddes R, Frank J, Haw S. A rapid review of key strategies to improve the cognitive and social development of children in Scotland. *Health Policy (Amsterdam, Netherlands)*. 2011;101(1):20-8. doi: 10.1016/j.healthpol.2010.08.013. PubMed PMID: 20822824.
95. Hithersay R, Strydom A, Moulster G, Buszewicz M. Carer-led health interventions to monitor, promote and improve the health of adults with intellectual disabilities in the community: a systematic review. *Research In Developmental Disabilities*. 2014;35(4):887-907. doi: 10.1016/j.ridd.2014.01.010. PubMed PMID: 24495402.
96. Humphreys DK, Ogilvie D. Synthesising evidence for equity impacts of population-based physical activity interventions: A pilot study. *International Journal of Behavioral Nutrition and Physical Activity*. 2013;10.
97. Jiwa M, McManus A, Dadich A. Continuity of cancer care: Where do primary care practitioners fit in? *Cancer Forum*. 2013;37(1):31-4.
98. Kreindler SA, Cui Y, Metge CJ, Raynard M. Patient characteristics associated with longer emergency department stay: A rapid review. *Emergency Medicine Journal*. 2015.
99. Kwok E, Konnyu KJ, Skidmore B, Moher D. Effectiveness and safety of emergency department short-stay units: A rapid review. *Canadian Journal of Emergency Medicine*. 2012;14:S5-S6.
100. Lal S, Adair CE. E-mental health: A rapid review of the literature. *Psychiatric Services*. 2014;65(1):24-32.
101. Lee C, Crawford C, Schoomaker E, Buckenmaier CC, Crawford P, Delgado R, et al. Movement therapies for the self-management of chronic pain symptoms. *Pain Medicine (United States)*. 2014;15(S1):S40-S53.
102. Lee C, Crawford C, Swann S. Multimodal, integrative therapies for the self-management of chronic pain symptoms. *Pain Medicine (Malden, Mass)*. 2014;15 Suppl 1:S76-S85. doi: 10.1111/pme.12408. PubMed PMID: 24734863.
103. Mann R, Gilbody S. Validity of two case finding questions to detect postnatal depression: a review of diagnostic test accuracy. *Journal Of Affective Disorders*. 2011;133(3):388-97. doi: 10.1016/j.jad.2010.11.015. PubMed PMID: 21146230.
104. McMurrin M. Individual-level interventions for alcohol-related violence: a rapid evidence assessment. *Criminal Behaviour And Mental Health: CBMH*. 2012;22(1):14-28. doi: 10.1002/cbm.821. PubMed PMID: 21823184.
105. Menear M, Briand C. Implementing a continuum of evidence-based psychosocial interventions for people with severe mental illness: part 1-review of major initiatives and implementation strategies. *Canadian Journal Of Psychiatry Revue Canadienne De Psychiatrie*. 2014;59(4):178-86. PubMed PMID: 25007110.
106. Moe-Byrne T, Chambers D, Harden M, McDaid C. Behaviour change interventions to promote prescribing of generic drugs: a rapid evidence synthesis and systematic review. *BMJ Open*. 2014;4(5):e004623-e. doi: 10.1136/bmjopen-2013-004623. PubMed PMID: 24833683.
107. Muñoz K, Caballero A, White K. Effectiveness of questionnaires for screening hearing of school-age children: a comprehensive literature review. *International Journal Of Audiology*. 2014;53(12):910-4. doi: 10.3109/14992027.2014.943846. PubMed PMID: 25140604.
108. Ndumbe-Eyoh S, Moffatt H. Intersectoral action for health equity: a rapid systematic review. *BMC Public Health*. 2013;13:1056-. doi: 10.1186/1471-2458-13-1056. PubMed PMID: 24209299.
109. Saeed S, Golfam M, Beall RF, Ashbury FD, Palmer LJ, Little J. Effectiveness of individual-

- 1  
2  
3 focused interventions to prevent chronic disease. *European Journal Of Clinical*  
4 *Investigation*. 2014;44(9):883-91. doi: 10.1111/eci.12298. PubMed PMID: 25041535.
- 5  
6 110. Trivedy CR, Cooke MW. Unscheduled Return Visits (URV) in adults to the Emergency  
7 Department (ED): A rapid evidence assessment policy review. *Emergency Medicine*  
8 *Journal*. 2015;32(4):324-9.
- 9  
10 111. Yu J, Wang Y, Li Y, Li X, Li C, Shen JT. The Da Vinci surgical system: A rapid review of the  
11 clinical and economic evidence. *Value in Health*. 2014;17(7):A798.
- 12  
13 112. Aerobic exercise training in patients with heart failure: a rapid review (Structured  
14 abstract). *Health Technology Assessment Database [Internet]*. 2015; (3). Available from:  
15 <http://onlinelibrary.wiley.com/o/cochrane/clhta/articles/HTA-32015000505/frame.html>.
- 16  
17 113. Criteria for referral to home care: a rapid review (Structured abstract). *Health Technology*  
18 *Assessment Database [Internet]*. 2015; (3). Available from:  
19 <http://onlinelibrary.wiley.com/o/cochrane/clhta/articles/HTA-32015000501/frame.html>.
- 20  
21 114. Physical activity counselling: a rapid review (Structured abstract). *Health Technology*  
22 *Assessment Database [Internet]*. 2015; (3). Available from:  
23 <http://onlinelibrary.wiley.com/o/cochrane/clhta/articles/HTA-32015000508/frame.html>.
- 24  
25 115. Care coordination for postacute stroke, chronic obstructive pulmonary disease, and heart  
26 failure clients: an economic rapid review (Structured abstract). *Health Technology*  
27 *Assessment Database [Internet]*. 2015; (3). Available from:  
28 <http://onlinelibrary.wiley.com/o/cochrane/clhta/articles/HTA-32015000492/frame.html>.
- 29  
30 116. Sodium restriction in heart failure: a rapid review (Structured abstract). *Health*  
31 *Technology Assessment Database [Internet]*. 2015; (3). Available from:  
32 <http://onlinelibrary.wiley.com/o/cochrane/clhta/articles/HTA-32015000504/frame.html>.
- 33  
34 117. Cognitive-behavioural therapy for anxiety and depression in patients with chronic  
35 obstructive pulmonary disease (COPD): a rapid review (Structured abstract). *Health*  
36 *Technology Assessment Database [Internet]*. 2015; (3). Available from:  
37 <http://onlinelibrary.wiley.com/o/cochrane/clhta/articles/HTA-32015000486/frame.html>.
- 38  
39 118. Communication of discharge instructions: a rapid review (Structured abstract). *Health*  
40 *Technology Assessment Database [Internet]*. 2015; (3). Available from:  
41 <http://onlinelibrary.wiley.com/o/cochrane/clhta/articles/HTA-32015000500/frame.html>.
- 42  
43 119. Prophylactic antibiotics for individuals with Chronic Obstructive Pulmonary Disease  
44 (COPD): a rapid review (Structured abstract). *Health Technology Assessment Database*  
45 *[Internet]*. 2015; (3). Available from:  
46 <http://onlinelibrary.wiley.com/o/cochrane/clhta/articles/HTA-32015000489/frame.html>.
- 47  
48 120. Respiratory therapy services in home care for individuals with chronic obstructive  
49 pulmonary disease (COPD): a rapid review (Structured abstract). *Health Technology*  
50 *Assessment Database [Internet]*. 2015; (3). Available from:  
51 <http://onlinelibrary.wiley.com/o/cochrane/clhta/articles/HTA-32015000491/frame.html>.
- 52  
53 121. Exercise programs after pulmonary rehabilitation for patients with chronic obstructive  
54 pulmonary disease (COPD): a rapid review (Structured abstract). *Health Technology*  
55 *Assessment Database [Internet]*. 2015; (3). Available from:  
56 <http://onlinelibrary.wiley.com/o/cochrane/clhta/articles/HTA-32015000488/frame.html>.
- 57  
58 122. Baidoobonso S. Effect of supportive interventions on informal caregivers of people at the  
59 end of life: a rapid review (Structured abstract). *Health Technology Assessment Database*  
60 *[Internet]*. 2014; (3). Available from:  
<http://onlinelibrary.wiley.com/o/cochrane/clhta/articles/HTA-32015000095/frame.html>.
123. Brenner S. Optimal timing to begin an active rehabilitation program after a hip fracture: a



- rapid review (Structured abstract). Health Technology Assessment Database [Internet]. 2013; (3). Available from: <http://onlinelibrary.wiley.com/o/cochrane/clhta/articles/HTA-32014001040/frame.html>.
124. Brener S. Effectiveness and safety of thrombolytics for the treatment of ischemic stroke: a rapid review (Structured abstract). Health Technology Assessment Database [Internet]. 2013; (3). Available from: <http://onlinelibrary.wiley.com/o/cochrane/clhta/articles/HTA-32014001030/frame.html>.
125. Bungay H, Vella-Burrows T. The effects of participating in creative activities on the health and well-being of children and young people: a rapid review of the literature (Provisional abstract). Perspectives in Public Health [Internet]. 2013; 133(1):[44-52 pp.]. Available from: <http://onlinelibrary.wiley.com/o/cochrane/cldare/articles/DARE-12013008651/frame.html>  
<http://rsh.sagepub.com/content/133/1/44.full.pdf>.
126. Ghazipura M. Optimal timing for antibiotic administration in patients with community-acquired pneumonia: a rapid review (Structured abstract). Health Technology Assessment Database [Internet]. 2013; (3). Available from: <http://onlinelibrary.wiley.com/o/cochrane/clhta/articles/HTA-32014001051/frame.html>.
127. Ghazipura M. Community versus inpatient rehabilitation in hip fracture patients: a rapid review (Structured abstract). Health Technology Assessment Database [Internet]. 2013; (3). Available from: <http://onlinelibrary.wiley.com/o/cochrane/clhta/articles/HTA-32014001045/frame.html>.
128. Ghazipura M. Cardiovascular and aerobic exercise in postacute stroke patients: a rapid review (Structured abstract). Health Technology Assessment Database [Internet]. 2015; (3). Available from: <http://onlinelibrary.wiley.com/o/cochrane/clhta/articles/HTA-32015000494/frame.html>.
129. Ghazipura M. Home-based versus centre-based rehabilitation for community-dwelling postacute stroke patients: an economic rapid review (Structured abstract). Health Technology Assessment Database [Internet]. 2015; (3). Available from: <http://onlinelibrary.wiley.com/o/cochrane/clhta/articles/HTA-32015000493/frame.html>.
130. Kabali C. Self-management and educational interventions in the postacute stroke population: a rapid review (Structured abstract). Health Technology Assessment Database [Internet]. 2015; (3). Available from: <http://onlinelibrary.wiley.com/o/cochrane/clhta/articles/HTA-32015000498/frame.html>.
131. Lambrinos A. Preoperative consultation: a rapid review (Structured abstract). Health Technology Assessment Database [Internet]. 2014; (3). Available from: <http://onlinelibrary.wiley.com/o/cochrane/clhta/articles/HTA-32014001064/frame.html>.
132. Lambrinos A. Medication reconciliation at discharge: a rapid review (Structured abstract). Health Technology Assessment Database [Internet]. 2015; (3). Available from: <http://onlinelibrary.wiley.com/o/cochrane/clhta/articles/HTA-32015000507/frame.html>.
133. Lambrinos A. Home-based exercise programs in heart failure: a rapid review (Structured abstract). Health Technology Assessment Database [Internet]. 2015; (3). Available from: <http://onlinelibrary.wiley.com/o/cochrane/clhta/articles/HTA-32015000506/frame.html>.
134. Ling D. Role of screening for respiratory syncytial virus or influenza and empirical antiviral treatment for patients with community-acquired pneumonia: a rapid review (Structured abstract). Health Technology Assessment Database [Internet]. 2013; (3). Available from: <http://onlinelibrary.wiley.com/o/cochrane/clhta/articles/HTA-32014001055/frame.html>.
135. McCurdy BR. Inhospital physiotherapy for acute exacerbations of chronic obstructive

- 1  
2  
3 pulmonary disease (AECOPD): a rapid review (Structured abstract). Health Technology  
4 Assessment Database [Internet]. 2013; (3). Available from:  
5 <http://onlinelibrary.wiley.com/doi/10.1111/j.1472-2148.2013.001027.x>.  
6
- 7 136. McCurdy BR. Action plans for individuals with chronic obstructive pulmonary disease  
8 (COPD): a rapid review (Structured abstract). Health Technology Assessment Database  
9 [Internet]. 2013; (3). Available from:  
10 <http://onlinelibrary.wiley.com/doi/10.1111/j.1472-2148.2013.001026.x>.  
11
- 12 137. Miani C, Ball S, Pitchforth E, Exley J, King S, Roland M, et al. Organisational interventions  
13 to reduce length of stay in hospital: a rapid evidence assessment (Structured abstract).  
14 Health Technology Assessment Database [Internet]. 2014; (3). Available from:  
15 <http://onlinelibrary.wiley.com/doi/10.1111/j.1472-2148.2014.001458.x>.  
16
- 17 138. Nikitovic M. Intensity of rehabilitation after hip fracture: a rapid review (Structured  
18 abstract). Health Technology Assessment Database [Internet]. 2013; (3). Available from:  
19 <http://onlinelibrary.wiley.com/doi/10.1111/j.1472-2148.2013.001044.x>.  
20
- 21 139. Schaink A. The effectiveness of statins for primary prevention: a rapid review (Structured  
22 abstract). Health Technology Assessment Database [Internet]. 2013; (3). Available from:  
23 <http://onlinelibrary.wiley.com/doi/10.1111/j.1472-2148.2013.001037.x>.  
24
- 25 140. Wang M. Airway clearance techniques for patients with stable chronic obstructive  
26 pulmonary disease (COPD): a rapid review (Structured abstract). Health Technology  
27 Assessment Database [Internet]. 2015; (3). Available from:  
28 <http://onlinelibrary.wiley.com/doi/10.1111/j.1472-2148.2015.000487.x>.  
29
- 30 141. Wang M. Pulmonary rehabilitation in the home versus other settings for individuals with  
31 chronic obstructive pulmonary disease (COPD): a rapid review (Structured abstract).  
32 Health Technology Assessment Database [Internet]. 2015; (3). Available from:  
33 <http://onlinelibrary.wiley.com/doi/10.1111/j.1472-2148.2015.000495.x>.  
34
- 35 142. Cottrell E, Whitlock E, Kato E, Uhl S, Belinson S, Chang C, et al. Defining the Benefits of  
36 Stakeholder Engagement in Systematic Reviews. AHRQ Methods for Effective Health Care.  
37 Rockville (MD)2014.  
38
- 39 143. Keown K, Van Eerd D, Irvin E. Stakeholder engagement opportunities in systematic  
40 reviews: knowledge transfer for policy and practice. J Contin Educ Health Prof.  
41 2008;28(2):67-72. doi: 10.1002/chp.159. PubMed PMID: 18521874.  
42  
43  
44  
45  
46  
47  
48  
49  
50  
51  
52  
53  
54  
55  
56  
57  
58  
59  
60

## Supplementary files

**File S1. Study protocol**

**File S2. PRISMA checklist**

**File S3a. Search strategy for systematic reviews in EBSCO Medline**

**File S3b. Search strategy for rapid reviews in Embase**

**File S4. Data extraction file: AMSTAR ratings**

**File S5. Data extraction file: Study characteristics**

**Table S1. References of excluded studies**

**Table S2. Characteristics of the study population by type of included review**

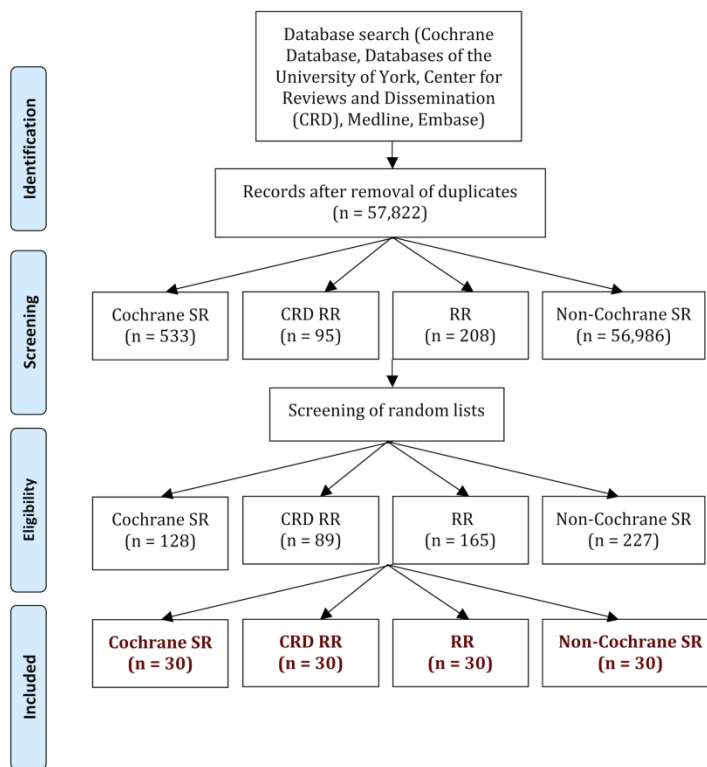

Flow diagram of study selection.

CRD: Databases of the University of York, Center for Reviews and Dissemination; RR: rapid review; SR: systematic review

99x129mm (600 x 600 DPI)

# Stakeholder involvement in systematic and rapid reviews of health services research

Protocol version 2

## 1. Background

### *Description of full systematic reviews (SR) and rapid reviews (RR)*

According to the Cochrane handbook (1), a traditional systematic review is a review that “attempts to collate all empirical evidence that fits pre-specified eligibility criteria in order to answer a specific research question. It uses explicit, systematic methods that are selected with a view to minimizing bias, thus providing more reliable findings from which conclusions can be drawn and decisions made”. While systematic reviews are considered to be the gold standard in knowledge synthesis, they are not without their limitations. For example, they usually require between 6 months and 2 years to complete and often focus on a narrow clinical question or set of questions. (2)

The key characteristics of a systematic review are (a) a clearly stated set of objectives with an explicit, reproducible methodology; (b) a systematic search that attempts to identify all studies that would meet the eligibility criteria; (c) an assessment of the validity of the findings of the included studies (e.g., assessment of risk of bias and confidence in cumulative estimates); and (d) systematic presentation, and synthesis, of the characteristics and findings of the included studies. (3) Systematic reviews should build on a protocol that describes the rationale, hypothesis, and planned methods of the review; few reviews report whether a protocol exists. Detailed, well-described protocols can facilitate the understanding and appraisal of the review methods, as well as the detection of modifications to methods and selective reporting in completed reviews (4).

Full systematic reviews (SR) and rapid reviews (RR) are two types of systematic reviews. They are often distinguished by the shorter time frame needed to produce a RR final report as well as by its less complex research topic (5): “Rapid reviews streamline traditional systematic review methods in order to synthesize evidence within a shortened timeframe” (6). As shown by Watt et al. RR did not have to be inherently inferior to SR despite “axiomatic differences” (7). He found that their conclusions did not differ much for similar research questions. However, SRs included methodologically more broader information, e.g. on economic evaluations or health service impact as well as more in-depth results, e.g. on clinical outcomes (8).

For SRs comprehensive guidance exists, e.g. based on the Cochrane Handbook (1). On the other hand, there is no standardized methodology for RRs and needs for at minimum increased transparency in reporting have been identified (5, 7).

RRs were often considered to target specific policy questions or to be tailored to a mandate or to the intended end-users (7). Therefore, they are often performed to inform decision making or commissioned by health policy makers.

Description of format contents: PICO or according to PRISMA.

### ***Description of stakeholder involvement***

Stakeholders represent decision- and policy-makers and institutions responsible for the selection and implementation of health policies, HTAs, guidelines or end-users. Experts in the respective field are not considered as stakeholders except if they contribute in the policy-planning as described above. It is also known that stakeholders often represent more than one perspective. Concannon et al. described the 7Ps of stakeholders: patients and the public, providers, purchasers, payers, policy makers, product makers, principal investigators (9)

The U.S. EHC Program defined a “stakeholder” as a person or group with a vested interest in a particular clinical decision and the evidence that supports that decision, including:

- Patients, caregivers, and patient advocacy organizations
- Clinicians and their professional associations
- Institutional health care providers, such as hospital systems and medical clinics
- Government agencies
- Purchasers and payers, such as employers and public and private insurers
- Health care industry representatives
- Health care policymakers at the Federal, State and local levels
- Health care researchers and research institutions.

In general stakeholders might be engaged in evidence prioritization, e.g. proposing the title of a systematic review, setting research priorities, in evidence generation, such as performing trials and observational studies, in evidence synthesis, e.g. SR, RR, meta-analysis, in evidence integration, such as modeling, mapping gaps and evidence or cost effectiveness or in evidence dissemination and application, e.g. implementation formats or feedback assessment . Therefore, engagement of stakeholders may not only direct the targeted research topics but also influence the quality and dissemination of study results (9).

At what stages stakeholders can be involved in during the systematic review process? Cottrell et al. identified six categories where the systematic review might benefit: establishing credibility, anticipating controversy, ensuring transparency and accountability, improving relevance and enhancing quality as well as increasing dissemination and uptake of systematic review findings (10). Several challenges to involve stakeholders were determined. They include limited time and resources, skills of researcher to engage stakeholders, finding the right people, balancing multiple inputs and understanding the most appropriate time in the review process to engage different types of stakeholders (10). On the other hand, factors for successful stakeholder engagement included a-priori clarification of the expectations, the roles, types of activities, early engagement in the process, ongoing relationships to build trust and credibility, equality of different stakeholders, tentative inclusion of a trained facilitator and sensitivity to tight timelines (11).

Methods for identifying, selecting, contacting and engaging stakeholders might differ.

Furthermore, characteristics of stakeholders themselves are important, e.g. their intensity and modes of engagement may vary according to their interests and expectations, their roles and

1  
2  
3 their level of power and influence (11). To date there have been few efforts to measure the  
4 benefits/tradeoffs of specific stakeholder engagement processes or differing approaches to  
5 selecting and engaging differing stakeholder types (10-13).  
6  
7

8 Of all phases of the systematic review, the topic refinement and developing the key questions  
9 was repeatedly identified as the point where stakeholder engagement yielded the greatest  
10 benefit (10).  
11  
12  
13

### 14 ***Definition of health services research***

15 See Appendix 1.  
16  
17  
18

### 19 ***Relevance of this study***

20 Systematic reviews may benefit from involving stakeholders, but less is known about the  
21 practice, e.g. the proportion of involved stakeholders in recently published SRs and RRs and  
22 their type(s) and benefits of engagement in the process of a SR or RR. This information is  
23 considered to be relevant for the implementation and/or acceptance of SRs and RRs.  
24  
25  
26  
27  
28

## 29 **2. Objectives**

30 Our aims are to assess, reflect and compare the current international practice of involving  
31 stakeholders in published full systematic reviews (SR) and in rapid reviews (RR) in the field of  
32 health services research.  
33  
34  
35  
36

## 37 **3. Methods**

### 38 ***Sample size considerations***

39 Sample size considerations are guided by practical reasons and resources available. As the  
40 power of the two proportions is expected to be sufficiently high anyway, due to the big expected  
41 difference of the two proportions reporting stakeholder involvement. We consider a proportion  
42 of 0.70 for RRs and of 0.25 for SRs. This results in a minimal expected difference of 0.45.  
43  
44  
45  
46

47 Two groups with N=25 per group show an estimated power of 0.88 and an alpha of 0.023.

48 To account for potential subgroup analysis, we include a sample of N=30 systematic reviews per  
49 group, with 4 groups (SRs, RRs and Cochrane SRs, Cochrane additional database RRs). This  
50 allows us to include a maximum of six predictors in the analysis when we perform two-group  
51 comparisons.  
52  
53  
54

55 We will proceed according to the STROBE guidelines as far as they are applicable.  
56  
57  
58

### 59 ***Groups to be studied ("study population")***

60 *Full systematic reviews:*



Two groups will be studied:

1. Full systematic reviews in general: self-declaration as SR within the title or Methods section of the article or registration as such in the databases searched.
2. Cochrane systematic reviews: SRs are performed according to the Cochrane handbook (1). They are registered, supervised and released within a Cochrane Review Group. They represent the gold standard.

These two groups are selected as they are expected to differ with respect to their transparency of conduct and quality assessment.

#### *Rapid reviews:*

Rapid reviews articles will be identified on the basis of the respective self-declaration within the title, Methods section of the abstract or registration as such in the databases searched.

As there is heterogeneity regarding methodology, different terms might be used, e.g. rapid review, rapid method, rapid evidence, rapid synthesis or evidence summary.

#### *Inclusion criteria:*

- titled as systematic review or rapid review or reported as such in the objective or method section of the abstract, respectively, or registered as such in the database searched
- studies including rapid review methodology as one part of the overall study
- published between January, 2011 and December, 2015 (it is most crucial to be sure to include sufficient RRs)
- targeting a health services research topic as included in the title or abstract of the article based on the definition provided in Appendix 1

#### *Exclusion criteria:*

- designed to assess exclusively economic or cost analysis as described in the title or abstract
- performing a review or overview of reviews
- describing a protocol of a systematic review
- efficacy studies, clinical trials phases I to III, epidemiological studies to assess determinants or risk factors, economic analyses, non-human studies, establishment of databases or registries
- unclear design or description of the intervention

The inclusion and exclusion criteria are presented in Appendix 2.

#### ***Targeted stakeholders***

We will assess any kind of stakeholder involvement. In addition we will record the following groups of stakeholders:

- Institutional health care providers, such as hospitals and community services

- Government agencies
- Health care policymakers at the Federal, State and local levels

## 4. Outcomes

### *Primary outcomes:*

- to assess any kind of stakeholder involvement: yes or no
- to assess type(s) of stakeholders involved, e.g. decision- or policy-maker, experts involved in policy-planning, such as institutional health care providers or community services
- to determine phase(s)-related contribution(s) of stakeholders, e.g. developing the research question, literature search, study relevance (quality assessment), formulating or judging recommendations etc.

in recently published SRs and RRs.

### *Secondary outcomes:*

- to evaluate some potential predictors: type and topic of included studies, study population, setting (individual, population group, population, policy) and overall quality score
- to assess reported adverse effects or barriers of stakeholder involvement
- to verify stakeholder involvement
- to report publication issues, such as presence of a review protocol, institutional background of the authors, e.g. specialized in evidence synthesis, year of publication, stakeholder included as key word, dissemination information

## 5. Data collection

### *Databases to be searched:*

- The following databases will be searched:  
Biomedical/Health: Ovid Medline, Embase. Within the search strategy Cochrane SRs will be excluded.
- Cochrane library (for Cochrane SRs) and Cochrane additional databases (for RRs, e.g. DARE reviews, named as CD RR)

The search strategy will be presented in Appendix 1.

### *Selection of studies*

Following the searches in the targeted databases all results of the corresponding systematic review type (SR, RR, Cochrane SR, CD RR) will be pooled and duplicates excluded. These lists will be ordered randomly using the statistical program package R and will be exported to an excel file. The resulting lists will enter the study screening.

### ***Screening of studies***

In consecutive order, the randomly ordered references of each group of systematic reviews (SR, RR, Cochrane) will be checked for the general information and the inclusion and exclusion criteria (Appendix 2) until a total of 30 studies are included for each group.

One review authors (JF) will independently screen titles and abstracts for general information, inclusion and exclusion, cross-checked by MM. Inconsistencies or disagreement will be resolved through discussion and with consultation of another review author (MP) where necessary. The process of study selection will be carefully recorded in order to complete the PRISMA-flow diagram.

### ***Data extraction and management***

We will use a data collection form for study characteristics and outcome data which has been piloted on two reviews, one SR and one RR. One author, JF, performs full text extraction, supervised and spot-checked by a second researcher, MM. Within the full text article every step of the review will be checked for stakeholder involvement. We will resolve disagreements by consensus or by involving a third review author (MP).

Regarding Cochrane SRs, the protocol (and not the full text article) will be checked for stakeholder involvement as the protocol is relevant for performing the SR.

In addition to the screening form in Appendix 2 we will extract the following data:

- Institution performing the systematic review and contact details of the corresponding author
- Specific topic and intervention within the field of health services research
- Setting: population, population group, individual, policy; major characteristics of the population (overall N, age range or groups, sex)
- Funding for systematic review and notable conflicts of interest of authors
- Stakeholder involvement: any, number, type(s) and phase(s) of involvement, mentioned as key word
- Methodological quality assessment using the AMSTAR tool

All data will enter an Excel file.

To confirm the presented stakeholder involvement and to ask for reasons, whether benefits of stakeholder involvement were measured and about dissemination, the contact author of the included articles will be contacted by emails with pre-formulated questions. It will be indicated that this information will be used for a publication but only summarized and anonymously. Contact authors will be sent one reminder in case of missing responses.

If feasible, two experts in the field will be contacted to review and comment this protocol and to contribute to the final article in order to ensure generalizability and transparency.

We will conduct this study according to this protocol and report deviations from it in the 'Differences between protocol and review' section.

### Potential for bias conducting this overview

- selection bias, e.g. regarding year of publication, no search for grey literature
- reporting bias, e.g. incomplete reporting, no study protocol

## 6. Data analysis

There will be a narrative description of the synthesis.

We will assess the overall proportion of stakeholder involvement as well as within subgroups and according to the outcomes described. We will compare the proportion of stakeholders involved between groups using the non-parametric Wilcoxon rank sum test.

The results of the AMSTAR assessment will be entered as a score.

### Differences between protocol and review

Will be listed if applicable.

### Conflicts of interest

None.

### Sources of support and funding

Involved authors: Jonas Feldmann (JF), Margot Mutsch (MM), Milo Alan Puhan (MP)

Internal sources

- Epidemiology, Biostatistics and Prevention Institute, University of Zurich, Zurich Switzerland

This is the host institution for the majority of the authors.

This work is part of the Master thesis of Jonas Feldmann.

## References

1. Higgins J, Green Se. Cochrane Handbook for Systematic Reviews of Interventions Version 5.1.0 [updated March 2011]. . Collaboration TC, editor. Available from <http://www.cochrane-handbook.org.2011>.
2. Khangura S, Konnyu K, Cushman R, Grimshaw J, Moher D. Evidence summaries: the evolution of a rapid review approach. *Syst Rev.* 2012;1:10.
3. Shamseer L, Moher D, Clarke M, Gherzi D, Liberati A, Petticrew M, et al. Preferred reporting items for systematic review and meta-analysis protocols (PRISMA-P) 2015: elaboration and explanation. *BMJ.* 2015;349:g7647.
4. Moher D, Shamseer L, Clarke M, Gherzi D, Liberati A, Petticrew M, et al. Preferred reporting items for systematic review and meta-analysis protocols (PRISMA-P) 2015 statement. *Syst Rev.* 2015;4:1.
5. Polisena J, Garritty C, Kamel C, Stevens A, Abou-Setta AM. Rapid review programs to support health care and policy decision making: a descriptive analysis of processes and methods. *Syst Rev.* 2015;4:26.
6. Ganann R, Ciliska D, Thomas H. Expediting systematic reviews: methods and implications of rapid reviews. *Implement Sci.* 2010;5:56.
7. Watt A, Cameron A, Sturm L, Lathlean T, Babidge W, Blamey S, et al. Rapid versus full systematic reviews: validity in clinical practice? *ANZ J Surg.* 2008;78(11):1037-40.
8. Watt A, Cameron A, Sturm L, Lathlean T, Babidge W, Blamey S, et al. Rapid reviews versus full systematic reviews: an inventory of current methods and practice in health technology assessment. *Int J Technol Assess Health Care.* 2008;24(2):133-9.
9. Concannon TW, Fuster M, Saunders T, Patel K, Wong JB, Leslie LK, et al. A systematic review of stakeholder engagement in comparative effectiveness and patient-centered outcomes research. *J Gen Intern Med.* 2014;29(12):1692-701.
10. Cottrell E, Whitlock E, Kato E, Uhl S, Belinson S, Chang C, et al. Defining the Benefits of Stakeholder Engagement in Systematic Reviews. *AHRQ Methods for Effective Health Care.* Rockville (MD)2014.
11. O'Haire C, McPheeters M, Nakamoto E, LaBrant L, Most C, Lee K, et al. Engaging Stakeholders To Identify and Prioritize Future Research Needs. *AHRQ Methods for Effective Health Care.* Rockville (MD)2011.
12. Keown K, Van Eerd D, Irvin E. Stakeholder engagement opportunities in systematic reviews: knowledge transfer for policy and practice. *J Contin Educ Health Prof.* 2008;28(2):67-72.
13. Kreis J, Puhan MA, Schunemann HJ, Dickersin K. Consumer involvement in systematic reviews of comparative effectiveness research. *Health Expect.* 2013;16(4):323-37.

## Appendix 1: Definition of health services research and search strategy (Ovid Medline)

### *Search strategy*

#### **Systematic reviews:**

- Cochrane Database: “systematic review” (title or abstract)
- Ovid Medline and Embase: “systematic review” (ti, ab), excluding “Cochrane” in title or abstract.
- No language restriction
- Published between January, 2011 and December, 2015

#### **Rapid reviews:**

- Terms: “rapid systematic review”, “rapid review”, “rapid evidence assessment” or “rapid health technology assessment” in title or abstract
- No language restriction
- Published between January, 2011 and December, 2015

### *Definition of health services research*

#### **No longer available:**

**Fields of health services research as defined by the Swiss Academy of Medical Sciences (SAMW)** (<http://www.samw.ch/de/Forschung/Versorgungsforschung/Kriterien.html>):

\*Adaptiert nach (Zugriff 28.11.11)

[www.bundesaerztekammer.de/page.asp?his=0.6.3289.3293.3295&all=true](http://www.bundesaerztekammer.de/page.asp?his=0.6.3289.3293.3295&all=true)

#### **Replaced by:**

Lohr KN, Steinwachs DM. Health services research: an evolving definition of the field. *Health Serv Res.* 2002;37(1):7-9. PubMed PMID: 11949927:

“Health services research is the multidisciplinary field of scientific investigation that studies how social factors, financing systems, organizational structures and processes, health technologies, and personal behaviors affect access to health care, the quality and cost of health care, and ultimately, our health and well-being. Its research domains are individuals, families, organizations, institutions, communities, and populations.”

Health Technology Assessments (HTAs) targeting effectiveness as well as meta-analyses and systematic reviews for effectiveness and utility, pharmaceutical trials under everyday conditions, basic research in care-related fields, quality research, methodological developments in the field of health services research, the development and application of new technologies (e-health) and the implementation of knowledge into the clinical practice were included. We excluded studies that focused exclusively on economic or cost analyses, performed a narrative review, an overview of reviews or a protocol of a systematic review. Efficacy studies without assessing the quality of life, clinical efficacy trials phases I to III, epidemiological studies to assess determinants or risk factors, non-human studies, establishment of databases or registries, studies with unclear design or description of the intervention were also excluded.

## Appendix 2: Screening of general information and check for inclusion and exclusion

### General information

|                             |                |                      |
|-----------------------------|----------------|----------------------|
| Study ID:                   | Report ID:     | Data form completed: |
| First author:               | Year of study: | Version number:      |
| Citation:                   |                |                      |
| Publication type (specify): |                |                      |

### Inclusion and exclusion criteria

#### A) For full systematic reviews

| Inclusion criteria:                                                                                                                             | Criteria fulfilled?<br>Please tick. |    |
|-------------------------------------------------------------------------------------------------------------------------------------------------|-------------------------------------|----|
|                                                                                                                                                 | Yes                                 | No |
| Is the article titled as systematic review or designed as such in the method section of the abstract or registered as such within the database? |                                     |    |
| Is the article published (at least online) between January, 2010 and August, 2015?                                                              |                                     |    |
| Does the article investigate a health services research topic as defined by the SAMW and presented in the title or abstract?                    |                                     |    |
| Does the article assess an intervention to reduce a condition as presented in the title or abstract?                                            |                                     |    |

**To be included, all questions in the above table have to be answered with Yes.**

| Exclusion criteria:                                                                                                                                                                                                                                                                                  | Criteria fulfilled? |    |
|------------------------------------------------------------------------------------------------------------------------------------------------------------------------------------------------------------------------------------------------------------------------------------------------------|---------------------|----|
|                                                                                                                                                                                                                                                                                                      | Yes                 | No |
| Does the article investigate efficacy or describes clinical trials phases I to III, epidemiological studies to assess determinants or risk factors, non-human studies or the establishment of databases or registries as described in the title or the objective or methods section of the abstract? |                     |    |
| Does the article exclusively describe an economic assessment or cost analysis in the title or abstract?                                                                                                                                                                                              |                     |    |
| Does the article describe an overview or review of reviews within the title or abstract?                                                                                                                                                                                                             |                     |    |
| Does the article describe a protocol of a systematic review?                                                                                                                                                                                                                                         |                     |    |



|                                                           |  |  |
|-----------------------------------------------------------|--|--|
| Is the design or the intervention of the article unclear? |  |  |
|-----------------------------------------------------------|--|--|

**To be included, all questions in the above table have to be answered with No.**

### B) For rapid reviews

| Inclusion criteria:                                                                                                                                                         | Criteria fulfilled?<br>Please tick. |    |
|-----------------------------------------------------------------------------------------------------------------------------------------------------------------------------|-------------------------------------|----|
|                                                                                                                                                                             | Yes                                 | No |
| Is the article titled as rapid review, rapid method or rapid synthesis or designed as such in the method section of the abstract or registered as such within the database? |                                     |    |
| Is the article published (at least online) between January, 2010 and August, 2015?                                                                                          |                                     |    |
| Does the article investigate a health services research topic as defined by the SAMW and presented in the title or abstract?                                                |                                     |    |
| Does the article assess an intervention to reduce a condition as presented in the title or abstract?                                                                        |                                     |    |

**To be included, all questions in the above table have to be answered with Yes.**

The exclusion criteria are the same as described in A).

### C) For Cochrane systematic reviews

| Inclusion criteria:                                                                                                          | Criteria fulfilled?<br>Please tick. |    |
|------------------------------------------------------------------------------------------------------------------------------|-------------------------------------|----|
|                                                                                                                              | Yes                                 | No |
| Is the article registered and published as Cochrane systematic review within the Cochrane database?                          |                                     |    |
| Is the article published (at least online) between January, 2010 and August, 2015?                                           |                                     |    |
| Does the article investigate a health services research topic as defined by the SAMW and presented in the title or abstract? |                                     |    |
| Does the article assess an intervention to reduce a condition as presented in the title or abstract?                         |                                     |    |

**To be included, all questions in the above table have to be answered with Yes.**

The exclusion criteria are the same as described in A).

## Appendix 3: Data extraction for full text assessment

### Variables to be assessed (excel file):

- Study type (Cochrane SR, SR, RR, CD RR), Study ID, Report ID
- First study author, contact details of corresponding author, country, mail contact
- Reference citation
- Year of study (publication), version (update or first review)
- Initials of data extractor, initials of people who cross-checked extraction
- Study protocol mentioned, PRISMA checklist used
- Specific review topic, thematic focus, type of intervention, setting
- Study population: size, type, age range of participants included, sex
- Funding source, Conflict of interest statement
- Stakeholder involvement (SI): SI mentioned, SI as key word, number of stakeholders involved, types, stages involved, reasons for SI mentioned, effects of SI mentioned,
- Amstar rating, comparison of rating (Health evidence/health system evidence)

### AMSTAR – a measurement tool to assess the methodological quality of systematic reviews.

#### 1. Was an 'a priori' design provided?

The research question and inclusion criteria should be established before the conduct of the review.

*Note: Need to refer to a protocol, ethics approval, or pre-determined/a priori published research objectives to score a "yes."*

- Yes
- No
- Can't answer
- Not applicable

#### 2. Was there duplicate study selection and data extraction?

There should be at least two independent data extractors and a consensus procedure for disagreements should be in place.

*Note: 2 people do study selection, 2 people do data extraction, consensus process or one person checks the other's work.*

- Yes
- No
- Can't answer
- Not applicable

#### 3. Was a comprehensive literature search performed?

At least two electronic sources should be searched. The report must include years and databases used (e.g., Central, EMBASE, and MEDLINE). Key words and/or MESH terms must be stated and where feasible the search strategy should be provided. All searches should be supplemented by consulting current contents, reviews, textbooks, specialized registers, or experts in the particular field of study, and by reviewing the references in the studies found.

*Note: If at least 2 sources + one supplementary strategy used, select "yes" (Cochrane register/Central counts as 2 sources; a grey literature search counts as supplementary).*

- Yes
- No
- Can't answer
- Not applicable

#### 4. Was the status of publication (i.e. grey literature) used as an inclusion criterion?

The authors should state that they searched for reports regardless of their publication type. The authors should state whether or not they excluded any reports (from the systematic review), based on their publication status, language etc.

*Note: If review indicates that there was a search for "grey literature" or "unpublished literature," indicate "yes." SIGLE database, dissertations, conference proceedings, and*

1  
2  
3 *trial registries are all considered grey for this purpose. If searching a source that contains*  
4 *both grey and non-grey, must specify that they were searching for grey/unpublished lit.*

- 5  Yes  
6  No  
7  Can't answer  
8  Not applicable

9 **5. Was a list of studies (included and excluded) provided?**

10 A list of included and excluded studies should be provided.

11 *Note: Acceptable if the excluded studies are referenced. If there is an electronic link to*  
12 *the list but the link is dead, select "no."*

- 13  Yes  
14  No  
15  Can't answer  
16  Not applicable

17 **6. Were the characteristics of the included studies provided?**

18 In an aggregated form such as a table, data from the original studies should be provided  
19 on the participants, interventions and outcomes. The ranges of characteristics in all the  
20 studies analyzed e.g., age, race, sex, relevant socioeconomic data, disease status,  
21 duration, severity, or other diseases should be reported.

22 *Note: Acceptable if not in table format as long as they are described as above.*

- 23  Yes  
24  No  
25  Can't answer  
26  Not applicable

27 **7. Was the scientific quality of the included studies assessed and documented?**

28 'A priori' methods of assessment should be provided (e.g., for effectiveness studies if the  
29 author(s) chose to include only randomized, double-blind, placebo controlled studies, or  
30 allocation concealment as inclusion criteria); for other types of studies alternative items  
31 will be relevant.

32 *Note: Can include use of a quality scoring tool or checklist, e.g., Jadad scale, risk of bias,*  
33 *sensitivity analysis, etc., or a description of quality items, with some kind of result for*  
34 *EACH study ("low" or "high" is fine, as long as it is clear which studies scored "low" and*  
35 *which scored "high"; a summary score/range for all studies is not acceptable).*

- 36  Yes  
37  No  
38  Can't answer  
39  Not applicable

40 **8. Was the scientific quality of the included studies used appropriately in**  
41 **formulating conclusions?**

42 The results of the methodological rigor and scientific quality should be considered in the  
43 analysis and the conclusions of the review, and explicitly stated in formulating  
44 recommendations.

45 *Note: Might say something such as "the results should be interpreted with caution due to*  
46 *poor quality of included studies." Cannot score "yes" for this question if scored "no" for*  
47 *question 7.*

- 48  Yes  
49  No  
50  Can't answer  
51  Not applicable

52 **9. Were the methods used to combine the findings of studies appropriate?**

53 For the pooled results, a test should be done to ensure the studies were combinable, to  
54 assess their homogeneity (i.e., Chi-squared test for homogeneity, I<sup>2</sup>). If heterogeneity  
55 exists a random effects model should be used and/or the clinical appropriateness of  
56 combining should be taken into consideration (i.e., is it sensible to combine?).

57 *Note: Indicate "yes" if they mention or describe heterogeneity, i.e., if they explain that*  
58 *they cannot pool because of heterogeneity/variability between interventions.*

- 59  Yes  
60  No  
61  Can't answer  
62  Not applicable

63 **10. Was the likelihood of publication bias assessed?**

64 An assessment of publication bias should include a combination of graphical aids (e.g.,  
65 funnel plot, other available tests) and/or statistical tests (e.g., Egger regression test,  
66 Hedges-Olken).

67 *Note: If no test values or funnel plot included, score "no". Score "yes" if mentions that*

1  
2  
3 *publication bias could not be assessed because there were fewer than 10 included*  
4 *studies.*

- 5  Yes  
6  No  
7  Can't answer  
8  Not applicable

9 **11. Was the conflict of interest included?**

10 Potential sources of support should be clearly acknowledged in both the systematic  
11 review and the included studies.

12 *Note: To get a "yes," must indicate source of funding or support for the systematic*  
13 *review AND for each of the included studies.*

- 14  Yes  
15  No  
16  Can't answer  
17  Not applicable

18 *Shea et al. BMC Medical Research Methodology 2007 7:10 doi:10.1186/1471-2288-7-10*  
19 *Additional notes (in italics) made by Michelle Weir, Julia Worswick, and Carolyn Wayne based on*  
20 *conversations with*

21 *Bev Shea and/or Jeremy Grimshaw in June and October 2008 and July and September 2010.*  
22  
23  
24  
25  
26  
27  
28  
29  
30  
31  
32  
33  
34  
35  
36  
37  
38  
39  
40  
41  
42  
43  
44  
45  
46  
47  
48  
49  
50  
51  
52  
53  
54  
55  
56  
57  
58  
59  
60

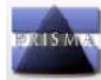

# PRISMA 2009 Checklist

For: **Characteristics of stakeholder involvement in systematic and rapid reviews:  
a methodological review in the area of health services research**

| Section/topic                      | #  | Checklist item                                                                                                                                                                                                                                                                                                                                 | Reported on page #     |
|------------------------------------|----|------------------------------------------------------------------------------------------------------------------------------------------------------------------------------------------------------------------------------------------------------------------------------------------------------------------------------------------------|------------------------|
| <b>TITLE</b>                       |    |                                                                                                                                                                                                                                                                                                                                                |                        |
| Title                              | 1  | Identify the report as a (systematic) <a href="#">methodological</a> review, meta-analysis, or both.                                                                                                                                                                                                                                           | 1                      |
| <b>ABSTRACT</b>                    |    |                                                                                                                                                                                                                                                                                                                                                |                        |
| Structured summary                 | 2  | Provide a structured summary including, as applicable: background; objectives; data sources; study eligibility criteria, participants, and interventions; study appraisal and synthesis methods; results; limitations; conclusions and implications of key findings; systematic review registration number ( <a href="#">not applicable</a> ). | 2                      |
| <b>INTRODUCTION</b>                |    |                                                                                                                                                                                                                                                                                                                                                |                        |
| Rationale                          | 3  | Describe the rationale for the review in the context of what is already known.                                                                                                                                                                                                                                                                 | 5                      |
| Objectives                         | 4  | Provide an explicit statement of questions being addressed with reference to participants, interventions, comparisons, outcomes, and study design (PICOS). <a href="#">Methodological assessment, no intervention</a>                                                                                                                          | 5-6                    |
| <b>METHODS</b>                     |    |                                                                                                                                                                                                                                                                                                                                                |                        |
| Protocol and registration          | 5  | Indicate if a review protocol exists, if and where it can be accessed (e.g., Web address), and, if available, provide registration information including registration number.                                                                                                                                                                  | 6                      |
| Eligibility criteria               | 6  | Specify study characteristics (e.g., PICOS, length of follow-up) and report characteristics (e.g., years considered, language, publication status) used as criteria for eligibility, giving rationale.                                                                                                                                         | 7-8                    |
| Information sources                | 7  | Describe all information sources (e.g., databases with dates of coverage, contact with study authors to identify additional studies) in the search and date last searched.                                                                                                                                                                     | 6-7                    |
| Search                             | 8  | Present full electronic search strategy for at least one database, including any limits used, such that it could be repeated.                                                                                                                                                                                                                  | Suppl. File S3a and 3b |
| Study selection                    | 9  | State the process for selecting studies (i.e., screening, eligibility, included in systematic review, and, if applicable, included in the meta-analysis).                                                                                                                                                                                      | 7-8                    |
| Data collection process            | 10 | Describe method of data extraction from reports (e.g., piloted forms, independently, in duplicate) and any processes for obtaining and confirming data from investigators.                                                                                                                                                                     | 7                      |
| Data items                         | 11 | List and define all variables for which data were sought (e.g., PICOS, funding sources) and any assumptions and simplifications made.                                                                                                                                                                                                          | 8-9                    |
| Risk of bias in individual studies | 12 | Describe methods used for assessing risk of bias of individual studies (including specification of whether this was done at the <a href="#">Study or outcome level</a> ), and how this information is to be used in any data synthesis.                                                                                                        | n/a<br>AMSTAR for      |

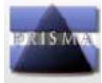

# PRISMA 2009 Checklist

For: **Characteristics of stakeholder involvement in systematic and rapid reviews:  
a methodological review in the area of health services research**

|                      |    |                                                                                                                                                           |                                              |
|----------------------|----|-----------------------------------------------------------------------------------------------------------------------------------------------------------|----------------------------------------------|
|                      |    |                                                                                                                                                           | methodological quality                       |
| Summary measures     | 13 | State the principal summary measures (e.g., risk ratio, difference in means).                                                                             | Stakeholder involvement per review type in % |
| Synthesis of results | 14 | Describe the methods of handling data and combining results of studies, if done, including measures of consistency (e.g., $I^2$ ) for each meta-analysis. | No meta-analysis                             |

Page 1 of 2

| Section/topic                 | #  | Checklist item                                                                                                                                                                                                                                                      | Reported on page #                      |
|-------------------------------|----|---------------------------------------------------------------------------------------------------------------------------------------------------------------------------------------------------------------------------------------------------------------------|-----------------------------------------|
| Risk of bias across studies   | 15 | Specify any assessment of risk of bias that may affect the cumulative evidence (e.g., publication bias, selective reporting within studies).                                                                                                                        | Reporting bias 19                       |
| Additional analyses           | 16 | Describe methods of additional analyses (e.g., sensitivity or subgroup analyses, meta-regression), if done, indicating which were pre-specified.                                                                                                                    | Not applicable                          |
| <b>RESULTS</b>                |    |                                                                                                                                                                                                                                                                     |                                         |
| Study selection               | 17 | Give numbers of studies screened, assessed for eligibility, and included in the review, with reasons for exclusions at each stage, ideally with a flow diagram.                                                                                                     | Figure 1                                |
| Study characteristics         | 18 | For each study, present characteristics for which data were extracted (e.g., study size, PICOS, follow-up period) and provide the citations.                                                                                                                        | Supplementary File S4 (part, AMSTAR)    |
| Risk of bias within studies   | 19 | Present data on risk of bias of each study and, if available, any outcome level assessment (see item 12).                                                                                                                                                           | AMSTAR (methodological characteristics) |
| Results of individual studies | 20 | For all outcomes considered (benefits or harms), present, for each study: (a) simple summary data for each intervention group (b) effect estimates and confidence intervals, ideally with a forest plot.                                                            | Not applicable                          |
| Synthesis of results          | 21 | Present results of each meta-analysis done, including confidence intervals and measures of consistency.                                                                                                                                                             | Not applicable                          |
| Risk of bias across studies   | 22 | Present results of any assessment of risk of bias across studies (see Item 15).                                                                                                                                                                                     |                                         |
| Additional analysis           | 23 | Give results of additional analyses, if done (e.g., sensitivity or subgroup analyses, meta-regression [see Item 16]).<br>For peer review only - <a href="http://bmjopen.bmj.com/site/about/guidelines.xhtml">http://bmjopen.bmj.com/site/about/guidelines.xhtml</a> | Not applicable                          |

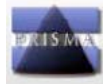

# PRISMA 2009 Checklist

For: **Characteristics of stakeholder involvement in systematic and rapid reviews:  
a methodological review in the area of health services research**

| DISCUSSION          |    |                                                                                                                                                                                      |       |
|---------------------|----|--------------------------------------------------------------------------------------------------------------------------------------------------------------------------------------|-------|
| Summary of evidence | 24 | Summarize the main findings including the strength of evidence for each main outcome; consider their relevance to key groups (e.g., healthcare providers, users, and policy makers). | 19-20 |
| Limitations         | 25 | Discuss limitations at study and outcome level (e.g., risk of bias), and at review-level (e.g., incomplete retrieval of identified research, reporting bias).                        | 19-22 |
| Conclusions         | 26 | Provide a general interpretation of the results in the context of other evidence, and implications for future research.                                                              | 23    |
| FUNDING             |    |                                                                                                                                                                                      |       |
| Funding             | 27 | Describe sources of funding for the systematic review and other support (e.g., supply of data); role of funders for the systematic review.                                           | 23    |

From: Moher D, Liberati A, Tetzlaff J, Altman DG, The PRISMA Group (2009). Preferred Reporting Items for Systematic Reviews and Meta-Analyses: The PRISMA Statement. PLoS Med 6(7): e1000097. doi:10.1371/journal.pmed1000097

For more information, visit: [www.prisma-statement.org](http://www.prisma-statement.org).

Page 2 of 2



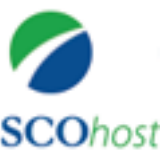

Thursday, October 22, 2015 6:29:28 AM

1  
2  
3  
4  
5  
6  
7  
8  
9  
10  
11  
12  
13  
14  
15  
16  
17  
18  
19  
20  
21  
22  
23  
24  
25  
26  
27  
28  
29  
30  
31  
32  
33  
34  
35  
36  
37  
38  
39  
40  
41  
42  
43  
44  
45  
46  
47  
48  
49  
50  
51  
52  
53  
54  
55  
56  
57  
58  
59  
60

| Query                                                                     | Limiters/Expanders                                                                                     | Last Run Via                                                                                            | Results |
|---------------------------------------------------------------------------|--------------------------------------------------------------------------------------------------------|---------------------------------------------------------------------------------------------------------|---------|
| AB "systematic review"<br>OR TI "systematic<br>review" NOT AB<br>cochrane | Limiters - Date of<br>Publication: 20110101-<br>20151231<br>Search modes - Find all<br>my search terms | Interface - EBSCOhost<br>Research Databases<br>Search Screen - Advanced<br>Search<br>Database - MEDLINE | 38,740  |
| AB "systematic review"<br>OR TI "systematic<br>review"                    | Limiters - Date of<br>Publication: 20110101-<br>20151231<br>Search modes - Find all<br>my search terms | Interface - EBSCOhost<br>Research Databases<br>Search Screen - Advanced<br>Search<br>Database - MEDLINE | 42,718  |

## Embase Session Results

| No. | Query                                                                                                                                                                                                                                                                                                                                     | Results |
|-----|-------------------------------------------------------------------------------------------------------------------------------------------------------------------------------------------------------------------------------------------------------------------------------------------------------------------------------------------|---------|
| #13 | 'rapid systematic review' OR 'rapid review' OR 'rapid evidence assessment' OR 'rapid health technology assessment' OR 'rapid assessment':ab,ti AND [2011-2015]/py                                                                                                                                                                         | 1,343   |
| #12 | 'rapid systematic review' OR 'rapid review' OR 'rapid evidence assessment' OR 'rapid health technology assessment':ab,ti AND [2011-2015]/py                                                                                                                                                                                               | 188     |
| #11 | 'rapid systematic review' OR 'rapid review' OR 'rapid evidence assessment' OR 'rapid health technology assessment' OR 'brief review':ab,ti AND [2011-2015]/py                                                                                                                                                                             | 3,710   |
| #10 | 'rapid systematic review' OR 'rapid review' OR 'rapid evidence assessment' OR 'rapid evidence' OR 'rapid health technology assessment' OR 'evidence brief' OR 'evidence summary' OR 'brief review':ab,ti AND [2011-2015]/py                                                                                                               | 3,801   |
| #9  | 'rapid assessment' OR 'rapid systematic review' OR 'rapid review' OR 'rapid evidence assessment' OR 'rapid evidence' OR 'rapid health technology assessment' OR 'evidence brief' OR 'evidence summary' OR 'brief review':ab,ti AND [2011-2015]/py                                                                                         | 4,977   |
| #8  | 'rapid assessment' OR 'rapid systematic review' OR 'rapid review' OR 'rapid evidence assessment' OR 'rapid evidence' OR 'rapid synthesis' OR 'rapid health technology assessment' OR 'evidence brief' OR 'evidence summary' OR 'brief review':ab,ti AND [2011-2015]/py                                                                    | 5,372   |
| #7  | 'rapid assessment' OR 'rapid systematic review' OR 'rapid review' OR 'rapid evidence assessment' OR 'rapid method' OR 'rapid evidence' OR 'rapid synthesis' OR 'rapid health technology assessment' OR 'evidence brief' OR 'evidence summary' OR 'brief review':ab,ti AND [2011-2015]/py                                                  | 7,285   |
| #6  | rapid AND (assessment OR 'systematic review'/exp OR 'systematic review' OR 'evidence assessment' OR 'health technology assessment' OR 'method'/exp OR method OR 'review'/exp OR review OR evidence OR 'synthesis'/exp OR synthesis) OR 'brief review' OR 'evidence brief' OR 'evidence summary':ab,ti AND [embase]/lim AND [2011-2015]/py | 143,957 |

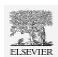

© 2015 Reed Elsevier Properties SA. All rights reserved.

Embase is a registered trademark of Reed Elsevier Properties SA, used under license.

Tabelle 1

### Characteristics of stakeholder involvement in systematic and rapid reviews: Data extraction: AMSTAR ratings

| Type<br>(SR, RR,<br>CRD<br>RR)     | Study ID | Year of<br>study | Citation                                                                                                                                                                                                                                                        | AMSTAR assessment  |                                 |                                                                                                                                            |                                                                                                                                               |
|------------------------------------|----------|------------------|-----------------------------------------------------------------------------------------------------------------------------------------------------------------------------------------------------------------------------------------------------------------|--------------------|---------------------------------|--------------------------------------------------------------------------------------------------------------------------------------------|-----------------------------------------------------------------------------------------------------------------------------------------------|
|                                    |          |                  |                                                                                                                                                                                                                                                                 | Review<br>protocol | A priori<br>design<br>provided? | Was there duplicate<br>study selection and<br>data extraction? (at<br>least two independent<br>data extractors and<br>consensus procedure) | Comprehensive<br>literature search<br>performed? (at least two<br>electronic sources,<br>reports must include<br>years and databases<br>used) |
| <b>Cochrane systematic reviews</b> |          |                  |                                                                                                                                                                                                                                                                 |                    |                                 |                                                                                                                                            |                                                                                                                                               |
| CSR                                | 101      | 2012             | Olsen O, Clausen JA. Planned hospital birth versus planned home birth. Cochrane Database of Systematic Reviews 2012, Issue 9. Art. No.: CD000352. DOI: 10.1002/14651858.CD000352.pub2.                                                                          | yes                | 1                               | 1                                                                                                                                          | 1                                                                                                                                             |
| CSR                                | 102      | 2013             | Moi JHY, Sriranganathan MK, Edwards CJ, Buchbinder R. Lifestyle interventions for acute gout. Cochrane Database of Systematic Reviews 2013, Issue 11. Art. No.: CD010519. DOI: 10.1002/14651858.CD010519.pub2.                                                  | yes                | 1                               | 1                                                                                                                                          | 1                                                                                                                                             |
| CSR                                | 103      | 2011             | Thomas RE, Lorenzetti D, Spragins W. Mentoring adolescents to prevent drug and alcohol use. Cochrane Database of Systematic Reviews 2011, Issue 11. Art. No.: CD007381. DOI: 10.1002/14651858.CD007381.pub2.                                                    | yes                | 1                               | 1                                                                                                                                          | 1                                                                                                                                             |
| CSR                                | 104      | 2012             | Garrison SR, Allan GM, Sekhon RK, Musini VM, Khan KM. Magnesium for skeletal muscle cramps. Cochrane Database of Systematic Reviews 2012, Issue 9. Art. No.: CD009402. DOI: 10.1002/14651858.CD009402.pub2.                                                     | yes                | 1                               | 1                                                                                                                                          | 1                                                                                                                                             |
| CSR                                | 105      | 2012             | Tejani AM, Wasdell M, Spiwak R, Rowell G, Nathwani S. Carnitine for fatigue in multiple sclerosis. Cochrane Database of Systematic Reviews 2012, Issue 5. Art. No.: CD007280. DOI: 10.1002/14651858.CD007280.pub3.                                              | yes                | 1                               | 1                                                                                                                                          | 1                                                                                                                                             |
| CSR                                | 106      | 2013             | Taylor F, Huffman MD, Macedo AF, Moore THM, Burke M, Davey Smith G, Ward K, Ebrahim S. Statins for the primary prevention of cardiovascular disease. Cochrane Database of Systematic Reviews 2013, Issue 1. Art. No.: CD004816. DOI: 10.1002/14651858.CD004816. | yes                | 1                               | 1                                                                                                                                          | 1                                                                                                                                             |
| CSR                                | 107      | 2013             | Jorge EC, Jorge EN, El Dib RP. Early light reduction for preventing retinopathy of prematurity in very low birth weight infants. Cochrane Database of Systematic Reviews 2013, Issue 8. Art. No.: CD000122. DOI: 10.1002/14651858.CD000122.pub2.                | yes                | 1                               | 1                                                                                                                                          | 1                                                                                                                                             |
| CSR                                | 108      | 2012             | Jin H, Leng Q, Li C. Dietary flavonoid for preventing colorectal neoplasms. Cochrane Database of Systematic Reviews 2012, Issue 8. Art. No.: CD009350. DOI: 10.1002/14651858.CD009350.pub2.                                                                     | yes                | 1                               | 1                                                                                                                                          | 1                                                                                                                                             |
| CSR                                | 109      | 2014             | Karmali KN, Davies P, Taylor F, Beswick A, Martin N, Ebrahim S. Promoting patient uptake and adherence in cardiac rehabilitation. Cochrane Database of Systematic Reviews 2014, Issue 6. Art. No.: CD007131. DOI: 10.1002/14651858.CD007131.pub3.               | yes                | 1                               | 1                                                                                                                                          | 1                                                                                                                                             |

Tabelle1

| Status of publication used as inclusion criterion? (search for grey or unpublished literature?) | List of studies provided? (excluded studies referenced?) | Characteristics of included studies provided? | Scientific quality of included studies assessed and documented? (methods provided) | Scientific quality of included studies used appropriately in formulating conclusions? | Methods used to combine findings of studies appropriate? (mentions or describes heterogeneity?) | Likelihood of publication bias assessed? (graphical aids and/or statistical tests) | Conflict of interest included? | Final Score | Grouping of scores (strong: ≥8=2; moderate: 4-7=1; weak <4=0) | health evidence / health systems evidence platforms |
|-------------------------------------------------------------------------------------------------|----------------------------------------------------------|-----------------------------------------------|------------------------------------------------------------------------------------|---------------------------------------------------------------------------------------|-------------------------------------------------------------------------------------------------|------------------------------------------------------------------------------------|--------------------------------|-------------|---------------------------------------------------------------|-----------------------------------------------------|
| 1                                                                                               | 1                                                        | 1                                             | 1                                                                                  | 1                                                                                     | 1                                                                                               | 1                                                                                  | 1                              | 11          | 2                                                             | 6/9                                                 |
| 1                                                                                               | 1                                                        | 1                                             | 1                                                                                  | 1                                                                                     | 1                                                                                               | 1                                                                                  | 1                              | 11          | 2                                                             | not found                                           |
| 1                                                                                               | 1                                                        | 1                                             | 1                                                                                  | 1                                                                                     | 1                                                                                               | 1                                                                                  | 1                              | 11          | 2                                                             | 9 (strong)                                          |
| 1                                                                                               | 1                                                        | 1                                             | 1                                                                                  | 1                                                                                     | 1                                                                                               | 1                                                                                  | 1                              | 11          | 2                                                             | not found                                           |
| 1                                                                                               | 1                                                        | 1                                             | 1                                                                                  | 1                                                                                     | 1 na                                                                                            | 1                                                                                  | 1                              | 10          | 2                                                             | not found                                           |
| 1                                                                                               | 1                                                        | 1                                             | 1                                                                                  | 1                                                                                     | 1                                                                                               | 1                                                                                  | 1                              | 11          | 2                                                             | not found                                           |
| 1                                                                                               | 1                                                        | 1                                             | 1                                                                                  | 1                                                                                     | 1                                                                                               | 1                                                                                  | 1                              | 11          | 2                                                             | not found                                           |
| 1                                                                                               | 1                                                        | 1                                             | 1                                                                                  | 1                                                                                     | 1                                                                                               | 1                                                                                  | 1                              | 11          | 2                                                             | not found                                           |
| 1                                                                                               | 1                                                        | 1                                             | 1                                                                                  | 1                                                                                     | 1                                                                                               | 1                                                                                  | 1                              | 11          | 2                                                             | 9/10                                                |

Tabelle1

|    |     |     |      |                                                                                              |     |   |   |   |
|----|-----|-----|------|----------------------------------------------------------------------------------------------|-----|---|---|---|
| 1  |     |     |      |                                                                                              |     |   |   |   |
| 2  |     |     |      |                                                                                              |     |   |   |   |
| 3  |     |     |      |                                                                                              |     |   |   |   |
| 4  |     |     |      | Bjelakovic G, Gluud LL, Nikolova D, Whitfield K, Krstic G, Wetterslev J, Gluud C. Vitamin D  |     |   |   |   |
| 5  | CSR | 110 | 2014 | supplementation for prevention of cancer in adults. Cochrane Database of Systematic          | yes | 1 | 1 | 1 |
| 6  |     |     |      | Reviews 2014, Issue 6. Art. No.: CD007469. DOI: 10.1002/14651858.CD007469.pub2.              |     |   |   |   |
| 7  |     |     |      |                                                                                              |     |   |   |   |
| 8  | CSR | 111 | 2014 | Carney T, Myers BJ, Louw J, Okwundu CI. Brief school-based interventions and                 | yes | 1 | 1 | 1 |
| 9  |     |     |      | behavioural outcomes for substance-using adolescents. Cochrane Database of Systematic        |     |   |   |   |
| 10 |     |     |      | Reviews 2014, Issue 2. Art. No.: CD008969. DOI: 10.1002/14651858.CD008969.pub2.              |     |   |   |   |
| 11 | CSR | 112 | 2013 | Taylor MJ, Rudkin L, Bullemor-Day P, Lubin J, Chukwujekwu C, Hawton K. Strategies for        | yes | 1 | 1 | 1 |
| 12 |     |     |      | managing sexual dysfunction induced by antidepressant medication. Cochrane Database          |     |   |   |   |
| 13 |     |     |      | of Systematic Reviews 2013, Issue 5. Art. No.: CD003382. DOI:                                |     |   |   |   |
| 14 | CSR | 113 | 2012 | 10.1002/14651858.CD0033                                                                      | yes | 1 | 1 | 1 |
| 15 |     |     |      |                                                                                              |     |   |   |   |
| 16 | CSR | 114 | 2012 | Fonner VA, Denison J, Kennedy CE, O'Reilly K, Sweat M. Voluntary counseling and testing      | yes | 1 | 1 | 1 |
| 17 |     |     |      | (VCT) for changing HIV-related risk behavior in developing countries. Cochrane Database      |     |   |   |   |
| 18 |     |     |      | of Systematic Reviews 2012, Issue 9. Art. No.: CD001224. DOI: 10.1002/14651858.              |     |   |   |   |
| 19 | CSR | 115 | 2014 | Shields L, Zhou H, Pratt J, Taylor M, Hunter J, Pascoe E. Family-centred care for            | yes | 1 | 1 | 1 |
| 20 |     |     |      | hospitalised children aged 0-12 years. Cochrane Database of Systematic Reviews 2012,         |     |   |   |   |
| 21 |     |     |      | Issue 10. Art. No.: CD004811. DOI: 10.1002/14651858.CD004811.pub3.                           |     |   |   |   |
| 22 | CSR | 116 | 2013 | Nava F, Ghilotti F, Maggi L, Hatemi G, Del Bianco A, Merlo C, Filippini G, Tramacere I.      | yes | 1 | 1 | 1 |
| 23 |     |     |      | Biologics, colchicine, corticosteroids, immunosuppressants and interferon-alpha for Neuro-   |     |   |   |   |
| 24 |     |     |      | Behçet's Syndrome. Cochrane Database of Systematic Reviews 2014, Issue 12. Ar                |     |   |   |   |
| 25 | CSR | 117 | 2014 | Njei B, Kongnyuy EJ, Kumar S, Okwen MP, Sankar MJ, Mbuagbaw L. Optimal timing for            | yes | 1 | 1 | 1 |
| 26 |     |     |      | antiretroviral therapy initiation in patients with HIV infection and concurrent cryptococcal |     |   |   |   |
| 27 |     |     |      | meningitis. Cochrane Database of Systematic Reviews 2013, Issue 2. Art. No.: CD0             |     |   |   |   |
| 28 | CSR | 118 | 2013 | 10.1002/14651858.CD007796                                                                    | yes | 1 | 1 | 1 |
| 29 |     |     |      |                                                                                              |     |   |   |   |
| 30 | CSR | 119 | 2011 | Lager KE, Mistri AK, Khunti K, Haunton VJ, Sett AK, Wilson AD. Interventions for             | yes | 1 | 1 | 1 |
| 31 |     |     |      | improving modifiable risk factor control in the secondary prevention of stroke. Cochrane     |     |   |   |   |
| 32 |     |     |      | Database of Systematic Reviews 2014, Issue 5. Art. No.: CD009103. DOI: 10.1002/146518        |     |   |   |   |
| 33 | CSR | 120 | 2012 | 5. Art. No.: CD004879. DOI: 10.1002/14651858.CD004879.pub4.                                  | yes | 1 | 1 | 1 |
| 34 |     |     |      |                                                                                              |     |   |   |   |
| 35 | CSR | 121 | 2011 | Chen W, Zhang Y, Li X, Yang G, Liu JP. Chinese herbal medicine for diabetic peripheral       | yes | 1 | 1 | 1 |
| 36 |     |     |      | neuropathy. Cochrane Database of Systematic Reviews 2013, Issue 10. Art. No.:                |     |   |   |   |
| 37 |     |     |      | CD007796. DOI: 10.1002/14651858.CD007796.pub3.                                               |     |   |   |   |
| 38 | CSR | 122 | 2011 | Fede G, Germani G, Gluud C, Gurusamy KS, Burroughs AK. Propylthiouracil for alcoholic        | yes | 1 | 1 | 1 |
| 39 |     |     |      | liver disease. Cochrane Database of Systematic Reviews 2011, Issue 6. Art. No.:              |     |   |   |   |
| 40 |     |     |      | CD002800. DOI: 10.1002/14651858.CD002800.pub3.                                               |     |   |   |   |
| 41 | CSR | 120 | 2012 | Jefferson T, Rivetti A, Di Pietrantonj C, Demicheli V, Ferroni E. Vaccines for preventing    | yes | 1 | 1 | 1 |
| 42 |     |     |      | influenza in healthy children. Cochrane Database of Systematic Reviews 2012, Issue 8.        |     |   |   |   |
| 43 |     |     |      | Art. No.: CD004879. DOI: 10.1002/14651858.CD004879.pub4.                                     |     |   |   |   |
| 44 | CSR | 121 | 2011 | Akl EA, Oxman AD, Herrin J, Vist GE, Terrenato I, Sperati F, Costiniuk C, Blank D,           | yes | 1 | 1 | 1 |
| 45 |     |     |      | Schünemann H. Framing of health information messages. Cochrane Database of                   |     |   |   |   |
| 46 |     |     |      | Systematic Reviews 2011, Issue 12. Art. No.: CD006777. DOI:                                  |     |   |   |   |

Tabelle1

|    |   |      |    |    |    |    |   |   |   |    |   |                    |  |
|----|---|------|----|----|----|----|---|---|---|----|---|--------------------|--|
| 1  |   |      |    |    |    |    |   |   |   |    |   |                    |  |
| 2  |   |      |    |    |    |    |   |   |   |    |   |                    |  |
| 3  |   |      |    |    |    |    |   |   |   |    |   |                    |  |
| 4  |   |      |    |    |    |    |   |   |   |    |   |                    |  |
| 5  | 1 | 1    | 1  | 1  | 1  | 1  | 1 | 1 | 1 | 11 | 2 | 9 (strong)         |  |
| 6  |   |      |    |    |    |    |   |   |   |    |   |                    |  |
| 7  |   |      |    |    |    |    |   |   |   |    |   |                    |  |
| 8  | 1 | 1    | 1  | 1  | 1  | 1  | 1 | 1 | 1 | 11 | 2 | 10 (strong)        |  |
| 9  |   |      |    |    |    |    |   |   |   |    |   |                    |  |
| 10 |   |      |    |    |    |    |   |   |   |    |   |                    |  |
| 11 | 1 | 1    | 1  | 1  | 1  | 1  | 1 | 1 | 1 | 11 | 2 | not found          |  |
| 12 |   |      |    |    |    |    |   |   |   |    |   |                    |  |
| 13 |   |      |    |    |    |    |   |   |   |    |   |                    |  |
| 14 | 1 | 1    | 1  | 1  | 1  | 1  | 1 | 1 | 1 | 11 | 2 | 10/11              |  |
| 15 |   |      |    |    |    |    |   |   |   |    |   |                    |  |
| 16 |   |      |    |    |    |    |   |   |   |    |   |                    |  |
| 17 | 1 | 1    | 1  | 1  | 1  | na |   | 1 | 1 | 10 | 2 | 9/10               |  |
| 18 |   |      |    |    |    |    |   |   |   |    |   |                    |  |
| 19 | 1 | 1 na | na | na | na |    |   | 1 | 1 | 7  | 1 | not found          |  |
| 20 |   |      |    |    |    |    |   |   |   |    |   |                    |  |
| 21 | 1 | 1    | 1  | 1  | 1  | 1  | 1 | 1 | 1 | 11 | 2 | not found          |  |
| 22 |   |      |    |    |    |    |   |   |   |    |   |                    |  |
| 23 |   |      |    |    |    |    |   |   |   |    |   |                    |  |
| 24 | 1 | 1    | 1  | 1  | 1  | 1  | 1 | 1 | 1 | 11 | 2 | not found          |  |
| 25 |   |      |    |    |    |    |   |   |   |    |   |                    |  |
| 26 |   |      |    |    |    |    |   |   |   |    |   |                    |  |
| 27 | 1 | 1    | 1  | 1  | 1  | 1  | 1 | 1 | 1 | 11 | 2 | not found          |  |
| 28 |   |      |    |    |    |    |   |   |   |    |   |                    |  |
| 29 | 1 | 1    | 1  | 1  | 1  | 1  | 1 | 1 | 1 | 11 | 2 | not found          |  |
| 30 |   |      |    |    |    |    |   |   |   |    |   |                    |  |
| 31 |   |      |    |    |    |    |   |   |   |    |   |                    |  |
| 32 | 1 | 1    | 0  | 1  | 1  | 1  | 1 | 1 | 1 | 10 | 2 | 10 (strong)        |  |
| 33 |   |      |    |    |    |    |   |   |   |    |   |                    |  |
| 34 |   |      |    |    |    |    |   |   |   |    |   |                    |  |
| 35 | 1 | 1    | 1  | 1  | 1  | 1  | 1 | 1 | 1 | 11 | 2 | 10/11 & 9 (strong) |  |
| 36 |   |      |    |    |    |    |   |   |   |    |   |                    |  |
| 37 | 1 | 1 na | na | na | na |    |   | 1 | 1 | 7  | 1 | not found          |  |
| 38 |   |      |    |    |    |    |   |   |   |    |   |                    |  |
| 39 |   |      |    |    |    |    |   |   |   |    |   |                    |  |
| 40 |   |      |    |    |    |    |   |   |   |    |   |                    |  |
| 41 |   |      |    |    |    |    |   |   |   |    |   |                    |  |
| 42 |   |      |    |    |    |    |   |   |   |    |   |                    |  |
| 43 |   |      |    |    |    |    |   |   |   |    |   |                    |  |
| 44 |   |      |    |    |    |    |   |   |   |    |   |                    |  |
| 45 |   |      |    |    |    |    |   |   |   |    |   |                    |  |
| 46 |   |      |    |    |    |    |   |   |   |    |   |                    |  |

Tabelle1

|                                          |     |      |                                                                                                                                                                                                                                                                 |                     |   |   |   |  |
|------------------------------------------|-----|------|-----------------------------------------------------------------------------------------------------------------------------------------------------------------------------------------------------------------------------------------------------------------|---------------------|---|---|---|--|
| CSR                                      | 123 | 2011 | Cheuk DKL, Chiang AKS, Lee TL, Chan GCF, Ha SY. Vaccines for prophylaxis of viral infections in patients with hematological malignancies. Cochrane Database of Systematic Reviews 2011, Issue 3. Art. No.: CD006505. DOI: 10.1002/14651858.CD006505.pub2.       | yes                 | 1 | 1 | 1 |  |
| CSR                                      | 124 | 2015 | Kwong JSW, Lau HLC, Yeung F, Chau PH. Yoga for secondary prevention of coronary heart disease. Cochrane Database of Systematic Reviews 2015, Issue 7. Art. No.: CD009506. DOI: 10.1002/14651858.CD009506.pub4.                                                  | yes                 | 1 | 1 | 1 |  |
| CSR                                      | 125 | 2015 | Overdevest GM, Jacobs W, Vleggeert-Lankamp C, Thomé C, Gunzburg R, Peul W. Effectiveness of posterior decompression techniques compared with conventional laminectomy for lumbar stenosis. Cochrane Database of Systematic Reviews 2015, Issue 3. Art. No.: CD0 | yes                 | 1 | 1 | 1 |  |
| CSR                                      | 126 | 2014 | Marti-Carvajal AJ, Knight-Madden JM, Martinez-Zapata MJ. Interventions for treating leg ulcers in people with sickle cell disease. Cochrane Database of Systematic Reviews 2014, Issue 12. Art. No.: CD008394. DOI: 10.1002/14651858.CD008394.pub3.             | yes                 | 1 | 1 | 1 |  |
| CSR                                      | 127 | 2014 | Junker AE, Als-Nielsen B, Gluud C, Gluud LL. Dopamine agents for hepatic encephalopathy. Cochrane Database of Systematic Reviews 2014, Issue 2. Art. No.: CD003047. DOI: 10.1002/14651858.CD003047.pub3.                                                        | yes                 | 1 | 1 | 1 |  |
| CSR                                      | 128 | 2013 | Peckham EJ, Nelson EA, Greenhalgh J, Cooper K, Roberts ER, Agrawal A. Homeopathy for treatment of irritable bowel syndrome. Cochrane Database of Systematic Reviews 2013, Issue 11. Art. No.: CD009710. DOI: 10.1002/14651858.CD009710.pub2.                    | yes                 | 1 | 1 | 1 |  |
| CSR                                      | 129 | 2013 | Okwundu CI, Nagpal S, Musekiwa A, Sinclair D. Home- or community-based programmes for treating malaria. Cochrane Database of Systematic Reviews 2013, Issue 5. Art. No.: CD009527. DOI: 10.1002/14651858.CD009527.pub2.                                         | yes                 | 1 | 1 | 1 |  |
| CSR                                      | 130 | 2013 | Rahimi-Movaghar A, Amin-Esmaili M, Hefazi M, Yousefi-Nooraie R. Pharmacological therapies for maintenance treatments of opium dependence. Cochrane Database of Systematic Reviews 2013, Issue 1. Art. No.: CD007775. DOI: 10.1002/14651858.CD007775.pub2.       | yes                 | 1 | 1 | 1 |  |
| <b>Systematic reviews (non-Cochrane)</b> |     |      |                                                                                                                                                                                                                                                                 |                     |   |   |   |  |
| SR                                       | 131 | 2015 | Rush CJ, Campbell RT, Jhund PS, et al. Falling cardiovascular mortality in heart failure with reduced ejection fraction and implications for clinical trials. JACC Heart Fail. 2015;3(8):603–14.                                                                | none mentioned      | 1 | 1 | 1 |  |
| SR                                       | 132 | 2015 | Foersch M, Jacobs C, Wriedt S, Hechtner M, Wehrbein H. Effectiveness of maxillary protraction using facemask with or without maxillary expansion: a systematic review and meta-analysis. Clinical Oral Investigations [serial online]. July 2015;19(6):1181-119 | yes                 | 1 | 1 | 1 |  |
| SR                                       | 133 | 2015 | Sipe TA, Finnie RKC, Knopf JA, et al. Effects of mental health benefits legislation: A Community Guide systematic review. Am J Prev Med. 2015;48(6):755–766.                                                                                                    | yes (not mentioned) | 1 | 1 | 1 |  |
| SR                                       | 134 | 2013 | A.A. Ahmed, E. Alsharief, A. Alsharief, Intensive versus conventional glycemic control: what is best for patients with type 2 diabetes? Diabetes Metab Syndr, 7 (2013), pp. 48–51                                                                               | none mentioned      | 1 | 1 | 1 |  |
| SR                                       | 135 | 2012 | M. Panagioti, P.A. Gooding, N. Tarrier A meta-analysis of the association between posttraumatic stress disorder and suicidality: the role of comorbid depression; Compr. Psychiatry, 53 (2012), pp. 915–930                                                     | none mentioned      | 1 | 1 | 1 |  |
| SR                                       | 136 | 2015 | Z. Wang Age-dependent decline of association between obesity and mortality: a systematic review and meta-analysis Obes Res Clin Pract, 9 (2015), pp. 1–11                                                                                                       | yes (not mentioned) | 1 | 1 | 1 |  |
| SR                                       | 137 | 2015 | E. Rolka A systematic review of music and dyslexia, The Arts in Psychotherapy, 46 (2015), pp 24-32                                                                                                                                                              | no                  | 1 | 1 | 1 |  |



Tabelle1

1  
2  
3  
4  
5  
6  
7  
8  
9  
10  
11  
12  
13  
14  
15  
16  
17  
18  
19  
20  
21  
22  
23  
24  
25  
26  
27  
28  
29  
30  
31  
32  
33  
34  
35  
36  
37  
38  
39  
40  
41  
42  
43  
44  
45  
46

|    |   |      |    |    |    |   |   |   |   |    |   |                   |
|----|---|------|----|----|----|---|---|---|---|----|---|-------------------|
| 1  | 1 | 1    | 1  | 1  | 1  | 1 | 1 | 1 | 1 | 11 | 2 | not found         |
| 2  | 1 | 1 na | na | na | na |   |   | 1 | 1 | 7  | 1 | 9 (strong)        |
| 3  | 1 | 1    | 1  | 1  | 1  | 1 | 1 | 1 | 1 | 11 | 2 | not found         |
| 4  | 1 | 1    | 1  | 1  | 1  | 1 | 1 | 1 | 1 | 11 | 2 | not found         |
| 5  | 1 | 1    | 1  | 1  | 1  | 1 | 1 | 1 | 1 | 11 | 2 | not found         |
| 6  | 1 | 1    | 1  | 1  | 1  | 1 | 1 | 1 | 1 | 11 | 2 | not found         |
| 7  | 1 | 1    | 0  | 1  | 1  | 1 | 1 | 1 | 1 | 10 | 2 | 10/10             |
| 8  | 1 | 1    | 1  | 1  | 1  | 1 | 1 | 1 | 1 | 11 | 2 | not found         |
| 9  | 1 | 1    | 1  | 1  | 1  | 1 | 1 | 1 | 1 | 11 | 2 | not found         |
| 10 | 0 | 0    | 1  | 0  | 0  | 1 | 0 | 0 | 0 | 5  | 1 | not found         |
| 11 | 1 | 1    | 1  | 1  | 1  | 1 | 1 | 1 | 1 | 11 | 2 | not found         |
| 12 | 1 | 1    | 0  | 1  | 1  | 0 | 0 | 0 | 0 | 7  | 1 | 5/10 & 9 (strong) |
| 13 | 1 | 0    | 1  | 1  | 1  | 0 | 0 | 0 | 1 | 8  | 2 | not found         |
| 14 | 0 | 1    | 1  | 1  | 1  | 1 | 1 | 0 | 0 | 9  | 2 | not found         |
| 15 | 1 | 1    | 1  | 1  | 1  | 1 | 0 | 0 | 1 | 10 | 2 | not found         |
| 16 | 1 | 1    | 1  | 0  | 0  | 0 | 0 | 0 | 0 | 6  | 1 | not found         |

Tabelle1

|    |    |     |      |                                                                                                                                                                              |                |   |   |   |
|----|----|-----|------|------------------------------------------------------------------------------------------------------------------------------------------------------------------------------|----------------|---|---|---|
| 1  |    |     |      |                                                                                                                                                                              |                |   |   |   |
| 2  |    |     |      |                                                                                                                                                                              |                |   |   |   |
| 3  |    |     |      |                                                                                                                                                                              |                |   |   |   |
| 4  | SR | 138 | 2011 | Wu S, Cohen D, Shi Y, Pearson M, Sturm R. Economic analysis of physical activity interventions. <i>Am J Prev Med.</i> 2011;40(2):149–58.                                     | none mentioned | 1 | 1 | 1 |
| 5  |    |     |      | Rodgers M, Asaria M, Walker S, McMillan D, Lucock M, Harden M, et al. The clinical effectiveness and cost-effectiveness of low-intensity psychological interventions for the |                |   |   |   |
| 6  | SR | 139 | 2012 | secondary prevention of relapse after depression: a systematic review. <i>Health Technol</i>                                                                                 | yes            | 1 | 1 | 1 |
| 7  |    |     |      | Chien T-J, Liu C-Y, Chang Y-F, Fang C-J, Hsu C-H. Acupuncture for Treating Aromatase                                                                                         |                |   |   |   |
| 8  |    |     |      | Inhibitor-Related Arthralgia in Breast Cancer: A Systematic Review and Meta-Analysis. <i>Journal of Alternative and Complementary Medicine.</i> 2015;21(5):251-260.          | none           |   |   |   |
| 9  | SR | 140 | 2015 | doi:10.1089/acm.2014.0083.                                                                                                                                                   | mentioned      | 1 | 1 | 1 |
| 10 |    |     |      | Int J Integr Care 2013; Jul-Sep; URN:NBN:NL:Ui:10-1-114740 , Community services'                                                                                             | none           |   |   |   |
| 11 | SR | 141 | 2013 | involvement in the discharge of older adults from hospital into the community,                                                                                               | mentioned      | 1 | 1 | 1 |
| 12 |    |     |      | Johantgen M, Fountain L, Zangaro G, Newhouse R, Stanik-Hutt J, White K. Comparison of                                                                                        |                |   |   |   |
| 13 |    |     |      | labor and delivery care provided by certified nurse-midwives and physicians: a systematic                                                                                    | none           |   |   |   |
| 14 | SR | 142 | 2012 | review, 1990 to 2008. <i>Womens Health Issues Off Publ Jacobs Inst Womens Health.</i>                                                                                        | mentioned      | 1 | 1 | 1 |
| 15 |    |     |      | 2012;22:e73–e81. doi: 10.1016/j.whi.2011.06.005.                                                                                                                             |                |   |   |   |
| 16 |    |     |      | Rozet, F., Bastide, C., Beuzeboc, P., Cormier, L., Fromont, G., Hennequin, C., Soulié,                                                                                       |                |   |   |   |
| 17 |    |     |      | A6:1134 (2015). [Management of low-risk prostate cancer]. <i>Progrès En Urologie : Journal</i>                                                                               | none           |   |   |   |
| 18 | SR | 143 | 2015 | de l'Association Française d'urologie et de La Société Française d'urologie, 25(1), 1–10.                                                                                    | mentioned      | 1 | 0 | 0 |
| 19 |    |     |      | https://doi.org/10.1016/j.purol.2014.10.007                                                                                                                                  |                |   |   |   |
| 20 |    |     |      | Maglione, Margaret A.; Das, Lopamudra; Raaen, Laura; et al. Safety of Vaccines Used for                                                                                      | yes (not       |   |   |   |
| 21 | SR | 144 | 2014 | Routine Immunization of US Children: A Systematic Review <i>PEDIATRICS</i> Volume: 134                                                                                       | mentioned)     | 1 | 1 | 1 |
| 22 |    |     |      | Issue: 2 Pages: 325-337 Published: AUG 2014 DOI http://dx.doi.org/10.1542/peds.                                                                                              |                |   |   |   |
| 23 |    |     |      | Albrecht B, Staiger PK, Hall K, et al. (2014) Benzodiazepine use and aggressive                                                                                              | yes (not       |   |   |   |
| 24 | SR | 145 | 2014 | behaviour: A systematic review. <i>Australian and New Zealand Journal of Psychiatry</i> 48:                                                                                  | mentioned)     | 1 | 1 | 1 |
| 25 |    |     |      | 1096–1114. doi: 10.1177/0004867414548902                                                                                                                                     |                |   |   |   |
| 26 |    |     |      | Te Morenga Lisa, Mallard Simonette, Mann Jim. Dietary sugars and body weight:                                                                                                | yes            | 1 | 1 | 1 |
| 27 | SR | 146 | 2012 | systematic review and meta-analyses of randomised controlled trials and cohort studies                                                                                       |                |   |   |   |
| 28 |    |     |      | <i>BMJ</i> 2013; 346 :e7492 doi: http://dx.doi.org/10.1136/bmj.e7492                                                                                                         |                |   |   |   |
| 29 |    |     |      | Jeannette A. C. Lankhaar, Wouter R. de Vries, Jaap A. C. G. Jansen, Pierre M. J. Zelissen                                                                                    | none           |   |   |   |
| 30 | SR | 147 | 2014 | & Frank J. G. Backx (2014) Impact of Overt and Subclinical Hypothyroidism on Exercise                                                                                        | mentioned)     | 1 | 1 | 1 |
| 31 |    |     |      | Tolerance: A Systematic Review, <i>Research Quarterly for Exercise and Sport</i> , 85:3, 365-                                                                                |                |   |   |   |
| 32 |    |     |      | 389, DOI: 10.1080/02701367.2014.930405                                                                                                                                       |                |   |   |   |
| 33 |    |     |      | Vanessa Siffredi , Vicki Anderson , Richard J. Leventer & Megan M. Spencer- Smith (2013)                                                                                     | none           |   |   |   |
| 34 | SR | 148 | 2013 | Neuropsychological Profile of Agenesis of the Corpus Callosum: A Systematic Review,                                                                                          | mentioned)     | 1 | 1 | 1 |
| 35 |    |     |      | <i>Developmental Neuropsychology</i> , 38:1, 36-57, DOI: 10.1080/87565641.2012.721421                                                                                        |                |   |   |   |
| 36 |    |     |      | Llewellyn, A., Simmonds, M., Owen, C. G., and Woolacott, N. (2015) Childhood obesity as                                                                                      | yes            | 1 | 0 | 1 |
| 37 | SR | 149 | 2015 | a predictor of morbidity in adulthood: a systematic review and meta-analysis. <i>Obes Rev</i> ,                                                                              |                |   |   |   |
| 38 |    |     |      | 17: 56–67. doi: 10.1111/obr.12316.                                                                                                                                           | none           |   |   |   |
| 39 |    |     |      | Matsuda, A., Yamaoka, K., Tango, T., Matsuda, T., Nishimoto, H. (2014). Effectiveness of                                                                                     | mentioned)     | 1 | 1 | 1 |
| 40 | SR | 150 | 2014 | psychoeducational support on quality of life in early-stage breast cancer patients: A                                                                                        |                |   |   |   |
| 41 |    |     |      | systematic review and meta-analysis of randomized controlled trials. <i>Qual Life R</i>                                                                                      |                |   |   |   |
| 42 |    |     |      | A. Bak, J. Browne, H. P. Loveday and A. Tsiami (2013). Systematic review of nutritional                                                                                      | yes (not       |   |   |   |
| 43 | SR | 151 | 2013 | interventions to prevent healthcare-associated infections in undernourished elderly.                                                                                         | mentioned)     | 1 | 0 | 1 |
| 44 |    |     |      | Proceedings of the Nutrition Society, 72, E212 doi:10.1017/S0029665113002371.                                                                                                |                |   |   |   |

1  
2  
3  
4  
5  
6  
7  
8  
9  
10  
11  
12  
13  
14  
15  
16  
17  
18  
19  
20  
21  
22  
23  
24  
25  
26  
27  
28  
29  
30  
31  
32  
33  
34  
35  
36  
37  
38  
39  
40  
41  
42  
43  
44  
45  
46

Tabelle1

|   |   |   |   |    |   |   |   |   |   |    |           |            |
|---|---|---|---|----|---|---|---|---|---|----|-----------|------------|
| 0 | 1 | 0 | 0 | 0  | 0 | 0 | 0 | 0 | 0 | 4  | 1         | not found  |
| 1 | 1 | 0 | 1 | 1  | 1 | 1 | 1 | 1 | 1 | 10 | 2         | 8 (strong) |
| 1 | 0 | 1 | 1 | 1  | 1 | 1 | 0 | 1 | 9 | 2  | not found |            |
| 1 | 0 | 0 | 1 | 1  | 1 | 0 | 0 | 0 | 6 | 1  | not found |            |
| 0 | 0 | 1 | 1 | 1  | 1 | 1 | 0 | 0 | 7 | 1  | not found |            |
| 0 | 0 | 0 | 0 | na |   | 1 | 0 | 1 | 3 | 0  | not found |            |
| 1 | 0 | 0 | 0 | 0  | 0 | 0 | 0 | 1 | 5 | 1  | 3 (weak)  |            |
| 1 | 0 | 1 | 0 | 0  | 0 | 1 | 1 | 1 | 8 | 2  | not found |            |
| 1 | 0 | 1 | 0 | 0  | 0 | 1 | 1 | 1 | 8 | 2  | not found |            |
| 0 | 0 | 1 | 1 | 1  | 1 | 1 | 0 | 0 | 7 | 1  | not found |            |
| 0 | 0 | 1 | 0 | 0  | 0 | 0 | 0 | 0 | 4 | 1  | not found |            |
| 0 | 1 | 1 | 1 | 1  | 1 | 1 | 1 | 1 | 9 | 2  | not found |            |
| 0 | 0 | 1 | 1 | 1  | 1 | 1 | 0 | 0 | 7 | 1  | not found |            |
| 0 | 0 | 1 | 0 | 1  | 1 | 0 | 0 | 0 | 4 | 1  | not found |            |

Tabelle1

|    |     |      |                                                                                                                                                                                                                                                                                                                                                                 |                     |   |   |   |
|----|-----|------|-----------------------------------------------------------------------------------------------------------------------------------------------------------------------------------------------------------------------------------------------------------------------------------------------------------------------------------------------------------------|---------------------|---|---|---|
| SR | 152 | 2014 | L. Bourke, K. E. Homer, M. A. Thaha, L. Steed, D. J. Rosario, K. A. Robb, J. M. Saxton and S. J. C. Taylor Interventions to improve exercise behaviour in sedentary people living with and beyond cancer: A systematic review British Journal of Cancer (2014)                                                                                                  | yes (not mentioned) | 1 | 1 | 1 |
| SR | 153 | 2013 | BRAY, James et al. Effectiveness of parent-centred interventions [etc]. JBI Library of Systematic Reviews, [S.l.], v. 8, n. 16 Suppl, p. S34 - 45, jul. 2010. ISSN 1838-2142. <a href="http://www.joannabriggslibrary.org/jbilibrary/index.php/jbisrir/article/view/571/">http://www.joannabriggslibrary.org/jbilibrary/index.php/jbisrir/article/view/571/</a> | yes (not mentioned) | 1 | 1 | 0 |
| SR | 154 | 2014 | Tricco AC, Antony J, Khan PA, et al. Safety and effectiveness of dipeptidyl peptidase-4 inhibitors versus intermediate-acting insulin or placebo for patients with type 2 diabetes failing two oral antihyperglycaemic agents: a systematic review and network meta-analysis. BMJ Open 2014;4:e005752. doi:10.1136/bmjopen-2014-005752                          | yes                 | 1 | 1 | 1 |
| SR | 155 | 2012 | Agarwal R, Goldenberg M, Perry R, Ishak WW. The Quality of Life of Adults with Attention Deficit Hyperactivity Disorder: A Systematic Review. Innovations in Clinical Neuroscience. 2012;9(5-6):10-21.                                                                                                                                                          | no                  | 1 | 0 | 1 |
| SR | 156 | 2013 | Ian C. Scott, Rachael Tan, Daniel Stahl, Sophia Steer, Cathryn M. Lewis, and Andrew P. Cope The protective effect of alcohol on developing rheumatoid arthritis: a systematic review and meta-analysis Rheumatology (2013) 52 (5): 856-867 first published onli                                                                                                 | none mentioned      | 1 | 1 | 1 |
| SR | 157 | 2014 | Hu MB, Xu H, Bai PD, et al. Obesity has multifaceted impact on biochemical recurrence of prostate cancer: a dose-response meta-analysis of 36,927 patients. Med Oncol 2014; 31:829. DOI: 10.1007/s12032-013-0829-8                                                                                                                                              | none mentioned      | 1 | 1 | 1 |
| SR | 158 | 2014 | Blasco, M.A., Redleaf, M.I., 2014. Cochlear implantation in unilateral sudden deafness improves tinnitus and speech comprehension: meta-analysis and systematic review. Otol. Neurotol. 35 (8), 1426-1432. DOI: 10.1097/MAO.0000000000000431                                                                                                                    | none mentioned      | 1 | 1 | 1 |
| SR | 159 | 2014 | Vasconcellos, Fabricio; Seabra, Andre; Katzmarzyk, Peter T.; et al., Physical Activity in Overweight and Obese Adolescents: Systematic Review of the Effects on Physical Fitness Components and Cardiovascular Risk Factors SPORTS MEDICINE Volume: 44 Issue: 8 Pages: 1139-1152 Published: AUG 2014                                                            | none mentioned      | 1 | 1 | 1 |
| SR | 160 | 2015 | Gibbs et al., 2014, M. Gibbs, C. Winsper, S. Marwaha, E. Gilbert, M. Broome, S.P. Singh, Cannabis use and mania symptoms: a systematic review and meta-analysis J. Affect. Disord., 171C (2014), pp. 39–47, doi:10.1016/j.jad.2014.09.016                                                                                                                       | yes (not mentioned) | 1 | 1 | 1 |

**Rapid reviews**

1  
2  
3  
4  
5  
6  
7  
8  
9  
10  
11  
12  
13  
14  
15  
16  
17  
18  
19  
20  
21  
22  
23  
24  
25  
26  
27  
28  
29  
30  
31  
32  
33  
34  
35  
36  
37  
38  
39  
40  
41  
42  
43  
44  
45  
46

Tabelle1

|   |   |   |      |   |   |   |   |   |    |    |           |             |
|---|---|---|------|---|---|---|---|---|----|----|-----------|-------------|
| 1 | 1 | 1 | 1    | 1 | 1 | 1 | 1 | 1 | 0  | 10 | 2         | 10 (strong) |
| 0 | 0 | 0 | 0    | 0 | 0 | 1 | 1 | 1 | 5  | 1  | not found |             |
| 0 | 1 | 1 | 1    | 1 | 1 | 1 | 1 | 1 | 10 | 2  | not found |             |
| 0 | 0 | 1 | 0 na |   |   | 0 | 0 | 1 | 4  | 1  | not found |             |
| 0 | 0 | 1 | 0    | 0 | 0 | 1 | 0 | 1 | 6  | 1  | not found |             |
| 1 | 0 | 1 | 0    | 1 | 1 | 1 | 1 | 1 | 9  | 2  | not found |             |
| 1 | 1 | 1 | 0    | 0 | 0 | 0 | 0 | 1 | 7  | 1  | not found |             |
| 1 | 1 | 1 | 1    | 1 | 1 | 1 | 0 | 1 | 10 | 2  | not found |             |
| 1 | 1 | 1 | 1    | 1 | 1 | 1 | 1 | 1 | 11 | 2  | not found |             |

7

only

Tabelle1

|    |     |      |                                                                                                                                                                                                                                                                                                                                                           |                     |   |   |   |
|----|-----|------|-----------------------------------------------------------------------------------------------------------------------------------------------------------------------------------------------------------------------------------------------------------------------------------------------------------------------------------------------------------|---------------------|---|---|---|
| RR | 161 | 2015 | Sedation and Anesthesia Options for Diagnostic Procedures: A Review of Clinical Effectiveness and Guidelines<br>Menear M, Briand C.. Implementing a continuum of evidence-based psychosocial interventions for people with severe mental illness: part 1-review of major initiatives and implementation strategies. Can J Psychiatry (2014) 59(4):178–86. | no protocol         | 1 | 1 | 1 |
| RR | 162 | 2014 | Saeed S, Golfam M, Beall RF, Ashbury FD, Palmer LJ, Little J. Effectiveness of individual-focused interventions to prevent chronic disease. Eur J Clin Invest 2014;44:883–91.                                                                                                                                                                             | no protocol         | 0 | 1 | 1 |
| RR | 163 | 2014 | Sara A Kreindler, Yang Cui, Colleen J Metge, Melissa Raynard, Patient characteristics associated with longer emergency department stay: a rapid review, Emerg Med J 2016;33:3 194-199 Published Online First: 4 September 2015 doi:10.1136/emermed-2015-204913                                                                                            | none mentioned      | 1 | 1 | 1 |
| RR | 164 | 2015 | Chetan R Trivedy, Matthew W Cooke, Unscheduled return visits (URV) in adults to the emergency department (ED): a rapid evidence assessment policy review, Emerg Med J 2015;32:4 324-329 Published Online First: 28 October 2013 doi:10.1136/emermed-2013-202719                                                                                           | yes                 | 1 | 0 | 0 |
| RR | 165 | 2015 | J. Yu, Y. Wang, Y. Li, X. Li, C. Li, J.T. Shen, PHP74 - The DA Vinci Surgical System: A Rapid Review of the Clinical and Economic Evidence, Value in Health, Volume 17, Issue 7, November 2014, Page A798, ISSN 1098-3015, <a href="http://dx.doi.org/10.1016/j.jval.2014.08.476">http://dx.doi.org/10.1016/j.jval.2014.08.476</a> .                      | none mentioned      | 1 | 1 | 0 |
| RR | 166 | 2014 | Lal S, Adair CE. E-mental health: a rapid review of the literature. Psychiatr Serv. 2014;65:24–32.                                                                                                                                                                                                                                                        | none mentioned      | 1 | 0 | 0 |
| RR | 167 | 2014 | Beall RF, Baskerville N, Golfam M, Saeed S, Little J. Modes of delivery in prevention intervention studies: a rapid review. Eur J Clin Invest 2014;44:688–96. DOI: 10.1111/eci.12279                                                                                                                                                                      | mentioned           | 1 | 0 | 0 |
| RR | 168 | 2014 | Jiwa, M., McManus, A., and Dadich, A. (2013) Continuity of cancer care: Where do primary care practitioners fit in? Cancer Forum, 37(1): 31-34.                                                                                                                                                                                                           | yes                 | 1 | 1 | 1 |
| RR | 169 | 2013 | Movement Therapies for the Self-Management of Chronic Pain Symptoms, Courtney Lee, Cindy Crawford, Eric Schoomaker, Active Self-Care Therapies for Pain (PACT) Working Group, Pain Medicine Apr 2014, 15 (S1) S40-S53; DOI: 10.1111/pme.12411                                                                                                             | yes (not mentioned) | 1 | 0 | 0 |
| RR | 170 | 2014 | Boyce T, Holmes A (2012) Addressing Health Inequalities in the Delivery of the Human Papillomavirus Vaccination Programme: Examining the Role of the School Nurse. PLoS ONE 7(9): e43416. doi:10.1371/journal.pone.0043416                                                                                                                                | yes (not mentioned) | 1 | 1 | 1 |
| RR | 171 | 2012 | Attree P, French B, Milton B, Povall S, Whitehead M, Popay J. The experience of community engagement for individuals: a rapid review of evidence. Health & Social Care In The Community [serial online]. May 2011;19(3):250-260. Available from: MEDLINE, Ipswich, MA. doi: 10.1111/j.1365-2524.2010.00976.x                                              | none mentioned      | 1 | 0 | 0 |
| RR | 172 | 2011 | Sensory Art Therapies for the Self-Management of Chronic Pain Symptoms, Cindy Crawford, Courtney Lee, John Bingham, Active Self-Care Therapies for Pain (PACT) Working Group, Pain Medicine Apr 2014, 15 (S1) S66-S75; DOI: 10.1111/pme.12409                                                                                                             | none mentioned      | 1 | 0 | 0 |
| RR | 173 | 2014 | Ndumbe-Eyoh S, Moffatt H. Intersectoral action for health equity: a rapid systematic review. BMC Public Health. 2013;13:1056-2458-13-1056. DOI: 10.1186/1471-2458-13-1056                                                                                                                                                                                 | yes (not mentioned) | 1 | 1 | 1 |

Tabelle1

|    |   |   |   |   |   |   |   |   |   |    |   |           |    |  |
|----|---|---|---|---|---|---|---|---|---|----|---|-----------|----|--|
| 1  |   |   |   |   |   |   |   |   |   |    |   |           |    |  |
| 2  |   |   |   |   |   |   |   |   |   |    |   |           |    |  |
| 3  |   |   |   |   |   |   |   |   |   |    |   |           |    |  |
| 4  | 1 | 1 | 1 | 1 | 1 | 1 | 1 | 0 | 0 | 9  | 2 | not found | 9  |  |
| 5  |   |   |   |   |   |   |   |   |   |    |   |           |    |  |
| 6  |   |   |   |   |   |   |   |   |   |    |   |           |    |  |
| 7  | 0 | 0 | 0 | 0 | 0 | 0 | 0 | 0 | 1 | 3  | 0 | not found |    |  |
| 8  | 0 | 0 | 0 | 0 | 0 | 0 | 1 | 0 | 0 | 4  | 1 | not found | 4  |  |
| 9  |   |   |   |   |   |   |   |   |   |    |   |           |    |  |
| 10 |   |   |   |   |   |   |   |   |   |    |   |           |    |  |
| 11 |   |   |   |   |   |   |   |   |   |    |   |           |    |  |
| 12 | 0 | 1 | 1 | 0 | 0 | 0 | 0 | 0 | 1 | 4  | 1 | not found |    |  |
| 13 |   |   |   |   |   |   |   |   |   |    |   |           |    |  |
| 14 |   |   |   |   |   |   |   |   |   |    |   |           |    |  |
| 15 | 0 | 0 | 0 | 0 | 0 | 0 | 1 | 0 | 1 | 4  | 1 | not found | 4  |  |
| 16 |   |   |   |   |   |   |   |   |   |    |   |           |    |  |
| 17 |   |   |   |   |   |   |   |   |   |    |   |           |    |  |
| 18 | 0 | 0 | 0 | 0 | 0 | 0 | 0 | 0 | 0 | 2  | 0 | not found |    |  |
| 19 | 0 | 0 | 0 | 0 | 0 | 0 | 0 | 0 | 1 | 2  | 0 | not found |    |  |
| 20 |   |   |   |   |   |   |   |   |   |    |   |           |    |  |
| 21 |   |   |   |   |   |   |   |   |   |    |   |           |    |  |
| 22 | 0 | 0 | 0 | 0 | 0 | 0 | 0 | 0 | 0 | 3  | 0 | not found |    |  |
| 23 |   |   |   |   |   |   |   |   |   |    |   |           |    |  |
| 24 | 0 | 0 | 0 | 0 | 1 | 0 | 0 | 0 | 0 | 2  | 0 | not found |    |  |
| 25 |   |   |   |   |   |   |   |   |   |    |   |           |    |  |
| 26 |   |   |   |   |   |   |   |   |   |    |   |           |    |  |
| 27 | 0 | 0 | 1 | 1 | 0 | 0 | 0 | 0 | 1 | 6  | 1 | not found | 6  |  |
| 28 |   |   |   |   |   |   |   |   |   |    |   |           |    |  |
| 29 | 0 | 0 | 0 | 0 | 0 | 0 | 0 | 0 | 1 | 2  | 0 | not found |    |  |
| 30 |   |   |   |   |   |   |   |   |   |    |   |           |    |  |
| 31 |   |   |   |   |   |   |   |   |   |    |   |           |    |  |
| 32 | 0 | 0 | 0 | 0 | 0 | 0 | 0 | 0 | 1 | 3  | 0 | not found |    |  |
| 33 |   |   |   |   |   |   |   |   |   |    |   |           |    |  |
| 34 |   |   |   |   |   |   |   |   |   |    |   |           |    |  |
| 35 | 0 | 0 | 1 | 1 | 1 | 0 | 0 | 1 | 1 | 6  | 1 | not found |    |  |
| 36 |   |   |   |   |   |   |   |   |   |    |   |           |    |  |
| 37 | 1 | 0 | 1 | 1 | 1 | 1 | 1 | 1 | 1 | 10 | 2 | 7/10      | 10 |  |
| 38 |   |   |   |   |   |   |   |   |   |    |   |           |    |  |
| 39 |   |   |   |   |   |   |   |   |   |    |   |           |    |  |
| 40 |   |   |   |   |   |   |   |   |   |    |   |           |    |  |
| 41 |   |   |   |   |   |   |   |   |   |    |   |           |    |  |
| 42 |   |   |   |   |   |   |   |   |   |    |   |           |    |  |
| 43 |   |   |   |   |   |   |   |   |   |    |   |           |    |  |
| 44 |   |   |   |   |   |   |   |   |   |    |   |           |    |  |
| 45 |   |   |   |   |   |   |   |   |   |    |   |           |    |  |
| 46 |   |   |   |   |   |   |   |   |   |    |   |           |    |  |



Tabelle1

|    |     |      |                                                                                                                                                                                                                                                                                                                                                                                                  |                     |   |   |   |
|----|-----|------|--------------------------------------------------------------------------------------------------------------------------------------------------------------------------------------------------------------------------------------------------------------------------------------------------------------------------------------------------------------------------------------------------|---------------------|---|---|---|
| RR | 175 | 2014 | Brunton, G., Paraskeva, N., Caird, J., Bird, K. S., Kavanagh, J., Kwan, I., & ... Thomas, J. (2014). Psychosocial predictors, assessment, and outcomes of cosmetic procedures: a systematic rapid evidence assessment. <i>Aesthetic Plastic Surgery</i> , 38(5), 1030-1040. doi:10.1007/s00266-014-0369-4                                                                                        | yes (not mentioned) | 1 | 0 | 1 |
| RR | 176 | 2011 | Geddes et al., 2011, R. Geddes, J. Frank, S. Haw, A rapid review of key strategies to improve the cognitive and social development of children in Scotland, <i>Health Policy</i> , 101 (2011), pp. 20–28 doi:10.1016/j.healthpol.2010.08.013                                                                                                                                                     | none mentioned      | 1 | 1 | 1 |
| RR | 177 | 2013 | Humphreys, DK, Ogilvie, D. Synthesising evidence for equity impacts of population-based physical activity interventions: A pilot study. <i>Int J Behav Nutr Phys Act.</i> 2013;10:76. DOI: 10.1186/1479-5868-10-76                                                                                                                                                                               | none mentioned      | 1 | 0 | 1 |
| RR | 178 | 2014 | Muñoz, K., Caballero, A., & White, K. (2014). Effectiveness of questionnaires for screening hearing of school-age children: a comprehensive literature review. <i>International Journal Of Audiology</i> , 53(12), 910-914. doi:10.3109/14992027.2014.943846                                                                                                                                     | yes (not mentioned) | 1 | 0 | 1 |
| RR | 179 | 2014 | Physically Oriented Therapies for the Self-Management of Chronic Pain Symptoms, Cindy Crawford, Courtney Lee, Todd May, Active Self-Care Therapies for Pain (PACT) Working Group, <i>Pain Medicine</i> Apr 2014, 15 (S1) S54-S65; DOI: 10.1111/pme.12410                                                                                                                                         | none mentioned      | 1 | 1 | 1 |
| RR | 180 | 2014 | Moe-Byrne, T., Chambers, D., Harden, M., McDaid, C., Behaviour change interventions to promote prescribing of generic drugs: A rapid evidence synthesis and systematic review (2014) <i>BMJ Open</i> , 4 (5), art. no. e004623. doi: 10.1136/bmjopen-2013-004623                                                                                                                                 | yes                 | 1 | 1 | 1 |
| RR | 181 | 2014 | Hiithersay R, Strydom A, Moulster G & Buszewicz M (2014) Carer-led health interventions to monitor, promote and improve the health of adults with intellectual disabilities in the community: a systematic review. <i>Research in Developmental Disabilities</i> 35, 887–907. doi: 10.1016/j.ridd.2014.01.010                                                                                    | yes                 | 1 | 1 | 1 |
| RR | 182 | 2011 | Mann R, Gilbody S. Validity of two case finding questions to detect postnatal depression: a review of diagnostic test accuracy. <i>J Affect Disord.</i> 2011;133:388–97. doi:10.1016/j.jad.2010.11.015.                                                                                                                                                                                          | yes (not mentioned) | 1 | 0 | 1 |
| RR | 183 | 2013 | Barry, M. M., D'Eath, M., & Sixsmith, J. (2013). Interventions for improving population health literacy: insights from a rapid review of the evidence. <i>Journal Of Health Communication</i> , 18(12), 1507-1522. doi:10.1080/10810730.2013.840699                                                                                                                                              | yes (not mentioned) | 1 | 1 | 1 |
| RR | 184 | 2013 | Beck, C. R., Sokal, R., Arunachalam, N., Puleston, R., Cichowska, A., Kessel, A., Zambon, M., Nguyen-Van-Tam, J. S. and on behalf of the UK Antiviral Effectiveness Review Group (2013), Neuraminidase inhibitors for influenza: a review and public health perspective in the aftermath of the 2009 pandemic. <i>Influenza and Other Respiratory Viruses</i> , 7: 14–24. doi: 10.1111/irv.12048 |                     | 1 | 1 | 0 |
| RR | 185 | 2012 | McMurrin, M. (2012). Individual-level interventions for alcohol-related violence: a rapid evidence assessment. <i>Criminal Behaviour And Mental Health: CBMH</i> , 22(1), 14-28. doi:10.1002/cbm.821                                                                                                                                                                                             | yes (not mentioned) | 1 | 0 | 1 |
| RR | 186 | 2014 | Paul M. Dorresteyn, Norbertus A. Ipenburg, Kathryn J. Murphy, Michelle Smit, Jonna K. van Vulpen, Inge Wegner, Inge Stegeman, and Wilko Grolman, Rapid Systematic Review of Normal Audiometry Results as a Predictor for Benign Paroxysmal Positional Vertigo, <i>Otolaryngology -- Head and Neck Surgery</i> June 2014 150: 919-924, doi:10.1177/0194599814527233                               | none mentioned      | 1 | 1 | 1 |

1  
2  
3  
4  
5  
6  
7  
8  
9  
10  
11  
12  
13  
14  
15  
16  
17  
18  
19  
20  
21  
22  
23  
24  
25  
26  
27  
28  
29  
30  
31  
32  
33  
34  
35  
36  
37  
38  
39  
40  
41  
42  
43  
44  
45  
46

Tabelle1

|    |   |   |   |   |   |   |   |   |   |   |                                                                                  |   |
|----|---|---|---|---|---|---|---|---|---|---|----------------------------------------------------------------------------------|---|
| 1  | 1 | 0 | 0 | 1 | 1 | 1 | 0 | 1 | 7 | 1 | not found                                                                        | 7 |
| 2  | 0 | 0 | 0 | 0 | 0 | 0 | 0 | 0 | 3 | 0 | not found                                                                        |   |
| 3  | 0 | 0 | 0 | 0 | 0 | 1 | 0 | 1 | 4 | 1 | not found                                                                        |   |
| 4  | 0 | 0 | 1 | 0 | 0 | 0 | 0 | 1 | 4 | 1 | 6<br>(moderate)                                                                  |   |
| 5  | 0 | 0 | 1 | 1 | 1 | 1 | 1 | 1 | 9 | 2 | not found<br>na (no<br>rating tool<br>available for<br>this type of<br>document) | 9 |
| 6  | 0 | 0 | 1 | 1 | 0 | 0 | 0 | 1 | 6 | 1 | not found                                                                        |   |
| 7  | 0 | 0 | 1 | 1 | 1 | 0 | 1 | 1 | 7 | 1 | not found                                                                        |   |
| 8  | 0 | 0 | 1 | 1 | 1 | 1 | 1 | 1 | 0 | 8 | 7<br>(moderate)                                                                  | 8 |
| 9  | 0 | 0 | 0 | 0 | 0 | 1 | 0 | 1 | 4 | 1 | not found                                                                        | 4 |
| 10 | 0 | 0 | 1 | 0 | 0 | 0 | 0 | 0 | 3 | 0 | not found                                                                        |   |
| 11 | 0 | 0 | 1 | 1 | 1 | 0 | 0 | 1 | 7 | 1 | not found                                                                        |   |

Tabelle1

|                                      |     |      |                                                                                                                                                                                                                                                                                                                                                          |                     |   |   |   |
|--------------------------------------|-----|------|----------------------------------------------------------------------------------------------------------------------------------------------------------------------------------------------------------------------------------------------------------------------------------------------------------------------------------------------------------|---------------------|---|---|---|
| RR                                   | 187 | 2012 | KONNYU, K., KWOK, E., SKIDMORE, B., MOHER, D.. The effectiveness and safety of emergency department short stay units: a rapid review. Open Medicine, North America, 6, jan. 2012. Available at: <a href="http://www.openmedicine.ca/article/view/478/449">http://www.openmedicine.ca/article/view/478/449</a> .                                          | no protocol         | 1 | 1 | 1 |
| RR                                   | 188 | 2015 | Butow, P., Price, M. A., Shaw, J. M., Turner, J., Clayton, J. M., Grimison, P., Rankin, N., and Kirsten, L. (2015) Clinical pathway for the screening, assessment and management of anxiety and depression in adult cancer patients: Australian guidelines. Psycho-Oncology, 24: 987–1001. doi: 10.1002/pon.3920.                                        | no protocol         | 1 | 1 | 1 |
| RR                                   | 189 | 2014 | R.B. Costello, C.V. Lentino, C.C. Boyd, M.L. O'Connell, C.C. Crawford, M.L. Sprengel, et al., The effectiveness of melatonin for promoting healthy sleep: a rapid evidence assessment of the literature, Nutr. J., 13 (2014), p. 106 DOI: 10.1186/1475-2891-13-106                                                                                       | not published       | 1 | 0 | 1 |
| RR                                   | 190 | 2014 | Lee, C., Crawford, C., & Swann, S. (2014). Multimodal, integrative therapies for the self-management of chronic pain symptoms. Pain Medicine (Malden, Mass.), 15 Suppl 1S76-S85. doi:10.1111/pme.12408                                                                                                                                                   | yes (not mentioned) | 1 | 0 | 1 |
| <b>Rapid reviews (CRD databases)</b> |     |      |                                                                                                                                                                                                                                                                                                                                                          |                     |   |   |   |
| CRD RR                               | 191 | 2015 | Health Quality Ontario. Prophylactic antibiotics for individuals with chronic obstructive pulmonary disease (COPD): a rapid review. Health Quality Ontario; 2015 February. 26 p. Available from: <a href="http://www.hqontario.ca/evidence/evidence-process/episodes-of-">http://www.hqontario.ca/evidence/evidence-process/episodes-of-</a>             | none mentioned      | 1 | 0 | 1 |
| CRD RR                               | 192 | 2013 | Ghazipura M. Community versus inpatient rehabilitation in hip fracture patients: a rapid review. Toronto, Ontario; 2013 Apr. 23 p. Available from: <a href="http://www.hqontario.ca/evidence/publications-and-ohac-recommendations/rapid-reviews">http://www.hqontario.ca/evidence/publications-and-ohac-recommendations/rapid-reviews</a> .             | none mentioned      | 1 | 0 | 0 |
| CRD RR                               | 193 | 2015 | Health Quality Ontario. Sodium restriction in heart failure: a rapid review. Toronto: Health Quality Ontario; 2015 February. 20 p. Available from: <a href="http://www.hqontario.ca/evidence/evidence-process/episodes-of-care#community-chf">http://www.hqontario.ca/evidence/evidence-process/episodes-of-care#community-chf</a>                       | none mentioned      | 1 | 0 | 1 |
| CRD RR                               | 194 | 2014 | Lambrinos, A. Preoperative consultations: a rapid review. Toronto: Health Quality Ontario; 2014 March. 19 p. Available from: <a href="http://www.hqontario.ca/evidence/evidence-process/appropriateness-initiative#preop-consult">http://www.hqontario.ca/evidence/evidence-process/appropriateness-initiative#preop-consult</a> .                       | none mentioned      | 1 | 0 | 1 |
| CRD RR                               | 195 | 2013 | Ling D. Role of screening for respiratory syncytial virus or influenza and empirical antiviral treatment for patients with community-acquired pneumonia: a rapid review. Toronto, ON: Health Quality Ontario; 2013 November. 17 p. Available from: <a href="http://www.h">http://www.h</a>                                                               | none mentioned      | 1 | 0 | 1 |
| CRD RR                               | 196 | 2015 | Health Quality Ontario. Communication of discharge instructions: a rapid review. Toronto: Health Quality Ontario; 2015 February. 18 p. Available from: <a href="http://www.hqontario.ca/evidence/evidence-process/episodes-of-care#community-chf">http://www.hqontario.ca/evidence/evidence-process/episodes-of-care#community-chf</a> .                 | none mentioned      | 1 | 0 | 1 |
| CRD RR                               | 197 | 2013 | Ghazipura M. Optimal Timing for Antibiotic Administration in Patients with Community-Acquired Pneumonia. Toronto, ON: Health Quality Ontario; 2013 November. 23 p. Available from: <a href="http://www.hqontario.ca/evidence/publications-and-ohac-recommendations/rapi">http://www.hqontario.ca/evidence/publications-and-ohac-recommendations/rapi</a> | none mentioned      | 1 | 0 | 1 |

Tabelle1

|    |   |   |    |    |    |    |   |   |   |    |   |                                                         |   |
|----|---|---|----|----|----|----|---|---|---|----|---|---------------------------------------------------------|---|
|    |   |   |    |    |    |    |   |   |   |    |   | na (no rating tool available for this type of document) |   |
| 1  | 1 | 0 | 1  | 1  | 1  | 1  | 1 | 0 | 1 | 9  | 2 |                                                         | 9 |
| 2  | 0 | 0 | 0  | 0  | 0  | 0  | 0 | 0 | 0 | 3  | 0 | not found                                               | 3 |
| 3  | 0 | 0 | 1  | 0  | 0  | 1  | 0 | 0 | 1 | 5  | 1 | not found                                               | 5 |
| 4  | 0 | 0 | 1  | 1  | 1  | 0  | 1 | 1 | 1 | 7  | 1 | not found                                               | 7 |
| 5  |   |   |    |    |    |    |   |   |   | 4  |   |                                                         | 7 |
| 6  | 1 | 1 | 1  | 1  | 1  | 1  | 1 | 1 | 1 | 10 | 2 | not found                                               |   |
| 7  | 0 | 0 | 1  | 1  | 1  | na |   | 1 | 1 | 6  | 1 | not found                                               |   |
| 8  | 1 | 0 | 1  | 1  | 1  | 1  | 1 | 1 | 1 | 9  | 2 | not found                                               |   |
| 9  | 0 | 0 | 1  | 1  | 1  | 1  | 1 | 1 | 1 | 8  | 2 | not found                                               |   |
| 10 | 1 | 0 | na | na | na | na |   | 1 | 1 | 5  | 1 | not found                                               |   |
| 11 |   |   |    |    |    |    |   |   |   |    |   | na (no rating tool available for this type of document) |   |
| 12 | 1 | 0 | na | na | na | na |   | 1 | 1 | 5  | 1 | not found                                               |   |
| 13 | 1 | 0 | 0  | 1  | 1  | 1  | 1 | 1 | 1 | 8  | 1 | not found                                               |   |

Tabelle1

|        |     |      |                                                                                                                                                                                                                                                                                                                                                                   |                |   |   |   |
|--------|-----|------|-------------------------------------------------------------------------------------------------------------------------------------------------------------------------------------------------------------------------------------------------------------------------------------------------------------------------------------------------------------------|----------------|---|---|---|
|        |     |      | McCurdy BR. Action plans for individuals with chronic obstructive pulmonary disease (COPD): a rapid review. Toronto, ON: Health Quality Ontario; 2013 Jan. 20 p. Available from: <a href="http://www.hqontario.ca/evidence/publications-and-ohrac-recommendations/rapid-review">www.hqontario.ca/evidence/publications-and-ohrac-recommendations/rapid-review</a> | none mentioned | 1 | 0 | 1 |
| CRD RR | 198 | 2013 |                                                                                                                                                                                                                                                                                                                                                                   |                |   |   |   |
|        |     |      | Wang M. Pulmonary rehabilitation in the home versus other settings for individuals with chronic obstructive pulmonary disease (COPD): a rapid review. Toronto: Health Quality Ontario; 2015 February. 23 p. Available from: <a href="http://www.hqontario.ca/evidence/ev">http://www.hqontario.ca/evidence/ev</a>                                                 | none mentioned | 1 | 0 | 1 |
| CRD RR | 199 | 2015 |                                                                                                                                                                                                                                                                                                                                                                   |                |   |   |   |
|        |     |      | Bungay, H., & Vella-Burrows, T. (2013). The effects of participating in creative activities on the health and well-being of children and young people: A rapid review of the literature. Perspectives in Public Health, 133(1), 44–52.                                                                                                                            | none mentioned | 1 | 0 | 1 |
| CRD RR | 200 | 2013 |                                                                                                                                                                                                                                                                                                                                                                   |                |   |   |   |
|        |     |      | Lambrinos A. Home-based exercise programs in heart failure: a rapid review. Toronto: Health Quality Ontario; 2015 February. 21 p. Available from: <a href="http://www.hqontario.ca/evidence/evidence-process/episodes-of-care#community-chf">http://www.hqontario.ca/evidence/evidence-process/episodes-of-care#community-chf</a> .                               | none mentioned | 1 | 0 | 1 |
| CRD RR | 201 | 2015 |                                                                                                                                                                                                                                                                                                                                                                   |                |   |   |   |
|        |     |      | Health Quality Ontario. Home-based versus centre-based rehabilitation for community-dwelling postacute stroke patients: an economic rapid review. Toronto: Health Quality Ontario; 2015 February. 23 p. Available from: <a href="http://www.hqontario.ca/evidence/eviden">http://www.hqontario.ca/evidence/eviden</a>                                             | none mentioned | 1 | 0 | 1 |
| CRD RR | 202 | 2015 |                                                                                                                                                                                                                                                                                                                                                                   |                |   |   |   |
|        |     |      | Nikitovic M. Intensity of rehabilitation after hip fracture: a rapid review. Toronto, ON: Health Quality Ontario; 2013 Apr. 17 p. Available from: <a href="http://www.hqontario.ca/evidence/publications-and-ohrac-recommendations/rapid-reviews">http://www.hqontario.ca/evidence/publications-and-ohrac-recommendations/rapid-reviews</a> .                     | none mentioned | 1 | 0 | 1 |
| CRD RR | 203 | 2013 |                                                                                                                                                                                                                                                                                                                                                                   |                |   |   |   |
|        |     |      | Self-management and educational interventions in the postacute stroke population: a rapid review. Toronto, ON: Health Quality Ontario; 2015 February. 23 p. Available from: <a href="http://www.hqontario.ca/evidence/evidence-process/episodes-of-care#community-strok">http://www.hqontario.ca/evidence/evidence-process/episodes-of-care#community-strok</a>   | none mentioned | 1 | 0 | 1 |
| CRD RR | 204 | 2015 |                                                                                                                                                                                                                                                                                                                                                                   |                |   |   |   |
|        |     |      | Health Quality Ontario. Criteria for referral to home care: a rapid review. Toronto: Health Quality Ontario; 2015 February. 20 p. Available from: <a href="http://www.hqontario.ca/evidence/evidence-process/episodes-of-care#community-chf">http://www.hqontario.ca/evidence/evidence-process/episodes-of-care#community-chf</a> .                               | none mentioned | 1 | 0 | 1 |
| CRD RR | 205 | 2015 |                                                                                                                                                                                                                                                                                                                                                                   |                |   |   |   |
|        |     |      | Baidoobonso S. Effect of supportive interventions on informal caregivers of people at the end of life: a rapid review. Toronto: Health Quality Ontario; 2014 December. 25 p. Available from: <a href="http://www.hqontario.ca/evidence/publications-and-ohrac-recommenda">http://www.hqontario.ca/evidence/publications-and-ohrac-recommenda</a>                  | none mentioned | 1 | 0 | 0 |
| CRD RR | 206 | 2014 |                                                                                                                                                                                                                                                                                                                                                                   |                |   |   |   |
|        |     |      | Miani C, Ball S, Pitchforth E, Exley J, King S, Roland M, et al. Organisational interventions to reduce length of stay in hospital: a rapid evidence assessment. Health Serv Deliv Res 2014;2(52). DOI: 10.3310/hsdr02520                                                                                                                                         | yes            | 1 | 1 | 1 |
| CRD RR | 207 | 2014 |                                                                                                                                                                                                                                                                                                                                                                   |                |   |   |   |
|        |     |      | Wang M. Airway clearance techniques for patients with stable chronic obstructive pulmonary disease (COPD): a rapid review. Toronto: Health Quality Ontario; 2015 February. 23 p. Available from: <a href="http://www.hqontario.ca/evidence/evidence-process/episodes-of-">http://www.hqontario.ca/evidence/evidence-process/episodes-of-</a>                      | none mentioned | 1 | 0 | 1 |
| CRD RR | 208 | 2015 |                                                                                                                                                                                                                                                                                                                                                                   |                |   |   |   |

Tabelle1

|    |   |   |    |    |    |    |   |   |   |    |   |  |                                                         |
|----|---|---|----|----|----|----|---|---|---|----|---|--|---------------------------------------------------------|
| 1  |   |   |    |    |    |    |   |   |   |    |   |  |                                                         |
| 2  |   |   |    |    |    |    |   |   |   |    |   |  |                                                         |
| 3  |   |   |    |    |    |    |   |   |   |    |   |  |                                                         |
| 4  |   |   |    |    |    |    |   |   |   |    |   |  | na (no rating tool available for this type of document) |
| 5  |   |   |    |    |    |    |   |   |   |    |   |  |                                                         |
| 6  |   |   |    |    |    |    |   |   |   |    |   |  |                                                         |
| 7  | 1 | 0 | 1  | 1  | 1  | na |   | 1 | 1 | 8  | 2 |  |                                                         |
| 8  |   |   |    |    |    |    |   |   |   |    |   |  |                                                         |
| 9  | 1 | 0 | 0  | 1  | 1  |    | 1 | 1 | 1 | 8  | 2 |  | not found                                               |
| 10 |   |   |    |    |    |    |   |   |   |    |   |  |                                                         |
| 11 | 1 | 0 | 1  | 1  | 1  |    | 1 | 1 | 0 | 8  | 2 |  | 6 (moderate)                                            |
| 12 |   |   |    |    |    |    |   |   |   |    |   |  |                                                         |
| 13 | 1 | 0 | 1  | 1  | 1  |    | 1 | 1 | 1 | 9  | 2 |  | not found                                               |
| 14 |   |   |    |    |    |    |   |   |   |    |   |  | na (no rating tool available for this type of document) |
| 15 |   |   |    |    |    |    |   |   |   |    |   |  |                                                         |
| 16 |   |   |    |    |    |    |   |   |   |    |   |  |                                                         |
| 17 |   |   |    |    |    |    |   |   |   |    |   |  |                                                         |
| 18 | 1 | 0 | 0  | 0  | 0  |    | 0 | 1 | 1 | 5  | 1 |  | not found                                               |
| 19 |   |   |    |    |    |    |   |   |   |    |   |  |                                                         |
| 20 |   |   |    |    |    |    |   |   |   |    |   |  |                                                         |
| 21 | 1 | 0 | na | na | na | na |   | 1 | 1 | 5  | 1 |  | not found                                               |
| 22 |   |   |    |    |    |    |   |   |   |    |   |  |                                                         |
| 23 | 1 | 0 | 0  | 1  | 1  |    | 0 | 1 | 1 | 7  | 1 |  | not found                                               |
| 24 |   |   |    |    |    |    |   |   |   |    |   |  |                                                         |
| 25 | 1 | 0 | 1  | 1  | 1  |    | 0 | 1 | 1 | 8  | 2 |  | not found                                               |
| 26 |   |   |    |    |    |    |   |   |   |    |   |  | na (no rating tool available for this type of document) |
| 27 |   |   |    |    |    |    |   |   |   |    |   |  | na (no rating tool available for this type of document) |
| 28 |   |   |    |    |    |    |   |   |   |    |   |  | na (no rating tool available for this type of document) |
| 29 |   |   |    |    |    |    |   |   |   |    |   |  |                                                         |
| 30 | 0 | 0 | 1  | 1  | 1  |    | 0 | 1 | 1 | 6  | 1 |  | na (no rating tool available for this type of document) |
| 31 |   |   |    |    |    |    |   |   |   |    |   |  | na (no rating tool available for this type of document) |
| 32 |   |   |    |    |    |    |   |   |   |    |   |  |                                                         |
| 33 |   |   |    |    |    |    |   |   |   |    |   |  |                                                         |
| 34 | 1 | 1 | 1  | 1  | 1  |    | 1 | 1 | 1 | 11 | 2 |  | not found                                               |
| 35 |   |   |    |    |    |    |   |   |   |    |   |  |                                                         |
| 36 |   |   |    |    |    |    |   |   |   |    |   |  |                                                         |
| 37 | 1 | 0 | 1  | 1  | 1  |    | 0 | 1 | 1 | 8  | 2 |  | not found                                               |
| 38 |   |   |    |    |    |    |   |   |   |    |   |  |                                                         |
| 39 |   |   |    |    |    |    |   |   |   |    |   |  |                                                         |
| 40 |   |   |    |    |    |    |   |   |   |    |   |  |                                                         |
| 41 |   |   |    |    |    |    |   |   |   |    |   |  |                                                         |
| 42 |   |   |    |    |    |    |   |   |   |    |   |  |                                                         |
| 43 |   |   |    |    |    |    |   |   |   |    |   |  |                                                         |
| 44 |   |   |    |    |    |    |   |   |   |    |   |  |                                                         |
| 45 |   |   |    |    |    |    |   |   |   |    |   |  |                                                         |
| 46 |   |   |    |    |    |    |   |   |   |    |   |  |                                                         |

Tabelle1

|        |     |      |                                                                                                                                                                                                                                                                                                                                                                                     |                |   |   |   |
|--------|-----|------|-------------------------------------------------------------------------------------------------------------------------------------------------------------------------------------------------------------------------------------------------------------------------------------------------------------------------------------------------------------------------------------|----------------|---|---|---|
|        |     |      | Health Quality Ontario. Exercise programs after pulmonary rehabilitation for patients with chronic obstructive pulmonary disease (COPD). Toronto: Health Quality Ontario; 2015 February. 20 p. Available from: <a href="http://www.hqontario.ca/evidence/evidence-proces">http://www.hqontario.ca/evidence/evidence-proces</a>                                                      | none mentioned | 1 | 0 | 1 |
| CRD RR | 209 | 2015 | Health Quality Ontario. Respiratory services in home care for individuals with chronic obstructive pulmonary disease (COPD): a rapid review. Toronto: Health Quality Ontario; 2015 February. 20 p. Available from: <a href="http://www.hqontario.ca/evidence/evidence-pr">http://www.hqontario.ca/evidence/evidence-pr</a>                                                          | none mentioned | 1 | 0 | 1 |
| CRD RR | 210 | 2015 | Brener S. Optimal timing to begin an active rehabilitation program after a hip fracture: a rapid review. Toronto, ON: Health Quality Ontario; 2013 Apr. 20 p. Available from: <a href="http://www.hqontario.ca/evidence/publications-and-ohtac-recommendations/rapid-re">http://www.hqontario.ca/evidence/publications-and-ohtac-recommendations/rapid-re</a>                       | none mentioned | 1 | 0 | 1 |
| CRD RR | 211 | 2013 | Schaik A. The effectiveness of statins for primary prevention: a rapid review. Toronto, ON: Health Quality Ontario; 2013 Feb. 23 p. Available from: <a href="http://www.hqontario.ca/evidence/publications-and-ohtac-recommendations/rapid-reviews">http://www.hqontario.ca/evidence/publications-and-ohtac-recommendations/rapid-reviews</a>                                       | none mentioned | 1 | 0 | 1 |
| CRD RR | 212 | 2013 | Health Quality Ontario. Physical activity counselling: a rapid review. Toronto: Health Quality Ontario; 2015 February. 20 p. Available from: <a href="http://www.hqontario.ca/evidence/evidence-process/episodes-of-care#community-chf">http://www.hqontario.ca/evidence/evidence-process/episodes-of-care#community-chf</a>                                                        | none mentioned | 1 | 0 | 1 |
| CRD RR | 213 | 2015 | Health Quality Ontario. Cognitive-behavioural therapy for anxiety and depression in patients with COPD: a rapid review. Toronto: Health Quality Ontario; 2015 February. 21 p. Available from: <a href="http://www.hqontario.ca/evidence/evidence-process/episodes-of-care#community-stroke">http://www.hqontario.ca/evidence/evidence-process/episodes-of-care#community-stroke</a> | none mentioned | 1 | 0 | 1 |
| CRD RR | 214 | 2015 | Ghazipura M. Cardiovascular and aerobic exercise in postacute stroke patients: a rapid review. Toronto, ON: Health Quality Ontario; 2015 February. 17 p. Available from: <a href="http://www.hqontario.ca/evidence/evidence-process/episodes-of-care#community-chf">http://www.hqontario.ca/evidence/evidence-process/episodes-of-care#community-chf</a>                            | none mentioned | 1 | 0 | 1 |
| CRD RR | 215 | 2015 | Health Quality Ontario. Aerobic exercise training in patients with heart failure: a rapid review. Toronto: Health Quality Ontario; 2015 February. 19 p. Available from: <a href="http://www.hqontario.ca/evidence/evidence-process/episodes-of-care#community-chf">http://www.hqontario.ca/evidence/evidence-process/episodes-of-care#community-chf</a>                             | none mentioned | 1 | 0 | 1 |
| CRD RR | 216 | 2015 | Health Quality Ontario. Care coordination for postacute stroke, chronic obstructive pulmonary disease, and heart failure clients: an economic rapid review. Toronto: Health Quality Ontario; 2015 February. 20 p. Available from: <a href="http://www.hqontario.ca/evidence">http://www.hqontario.ca/evidence</a>                                                                   | none mentioned | 1 | 0 | 1 |
| CRD RR | 217 | 2015 | Lambrinos A. Medication reconciliation at discharge: a rapid review. Toronto: Health Quality Ontario; 2015 February. 24 p. Available from: <a href="http://www.hqontario.ca/evidence/evidence-process/episodes-of-care#community-chf">http://www.hqontario.ca/evidence/evidence-process/episodes-of-care#community-chf</a>                                                          | none mentioned | 1 | 0 | 1 |
| CRD RR | 218 | 2015 | McCurdy BR. Inhospital physiotherapy for acute exacerbations of chronic obstructive pulmonary disease (AECOPD): a rapid review. Toronto, ON: Health Quality Ontario; 2012 Dec. 28 p. Available from: <a href="http://www.hqontario.ca/evidence/publications-and-ohtac-recommend">http://www.hqontario.ca/evidence/publications-and-ohtac-recommend</a>                              | none mentioned | 1 | 0 | 1 |
| CRD RR | 219 | 2013 | Health Quality Ontario. Effectiveness and safety of thrombolytics for ischemic stroke: a rapid review. Toronto, ON: Health Quality Ontario; 2013 Jan. 25 p. Available from: <a href="http://www.hqontario.ca/evidence/publications-and-ohtac-recommendations/rapid-revi">http://www.hqontario.ca/evidence/publications-and-ohtac-recommendations/rapid-revi</a>                     | none mentioned | 1 | 0 | 1 |
| CRD RR | 220 | 2013 |                                                                                                                                                                                                                                                                                                                                                                                     |                |   |   |   |



Tabelle1

|    |   |      |    |    |      |   |   |   |   |   |                                                                                  |  |
|----|---|------|----|----|------|---|---|---|---|---|----------------------------------------------------------------------------------|--|
| 1  |   |      |    |    |      |   |   |   |   |   |                                                                                  |  |
| 2  |   |      |    |    |      |   |   |   |   |   |                                                                                  |  |
| 3  |   |      |    |    |      |   |   |   |   |   |                                                                                  |  |
| 4  |   |      |    |    |      |   |   |   |   |   |                                                                                  |  |
| 5  | 1 | 0    | 0  | 1  | 1    | 0 | 1 | 1 | 7 | 1 | not found                                                                        |  |
| 6  |   |      |    |    |      |   |   |   |   |   |                                                                                  |  |
| 7  | 1 | 0    | 1  | 1  | 1    | 0 | 1 | 1 | 8 | 2 | not found                                                                        |  |
| 8  |   |      |    |    |      |   |   |   |   |   |                                                                                  |  |
| 9  |   |      |    |    |      |   |   |   |   |   |                                                                                  |  |
| 10 | 1 | 0    | 1  | 1  | 1 na |   | 1 | 1 | 8 | 2 | not found                                                                        |  |
| 11 |   |      |    |    |      |   |   |   |   |   |                                                                                  |  |
| 12 |   |      |    |    |      |   |   |   |   |   |                                                                                  |  |
| 13 | 1 | 0    | 1  | 1  | 1    | 1 | 1 | 1 | 9 | 2 | not found                                                                        |  |
| 14 |   |      |    |    |      |   |   |   |   |   |                                                                                  |  |
| 15 | 1 | 0    | 1  | 1  | 1    | 0 | 1 | 1 | 8 | 2 | not found                                                                        |  |
| 16 |   |      |    |    |      |   |   |   |   |   |                                                                                  |  |
| 17 | 1 | 0    | 0  | 1  | 1    | 1 | 1 | 1 | 8 | 2 | not found                                                                        |  |
| 18 |   |      |    |    |      |   |   |   |   |   |                                                                                  |  |
| 19 |   |      |    |    |      |   |   |   |   |   |                                                                                  |  |
| 20 | 1 | 0    | 1  | 1  | 1    | 1 | 1 | 1 | 9 | 2 | not found                                                                        |  |
| 21 |   |      |    |    |      |   |   |   |   |   |                                                                                  |  |
| 22 | 1 | 0    | 1  | 1  | 1    | 1 | 1 | 1 | 9 | 2 | not found                                                                        |  |
| 23 |   |      |    |    |      |   |   |   |   |   |                                                                                  |  |
| 24 |   |      |    |    |      |   |   |   |   |   |                                                                                  |  |
| 25 |   |      |    |    |      |   |   |   |   |   |                                                                                  |  |
| 26 |   |      |    |    |      |   |   |   |   |   |                                                                                  |  |
| 27 | 1 | 0 na | na | na | na   |   | 1 | 1 | 5 | 1 | not found<br>na (no<br>rating tool<br>available for<br>this type of<br>document) |  |
| 28 |   |      |    |    |      |   |   |   |   |   |                                                                                  |  |
| 29 | 1 | 0    | 1  | 1  | 1    | 1 | 1 | 1 | 9 | 2 | not found                                                                        |  |
| 30 |   |      |    |    |      |   |   |   |   |   |                                                                                  |  |
| 31 | 1 | 0    | 0  | 1  | 0    | 1 | 1 | 1 | 7 | 1 | not found                                                                        |  |
| 32 |   |      |    |    |      |   |   |   |   |   |                                                                                  |  |
| 33 |   |      |    |    |      |   |   |   |   |   |                                                                                  |  |
| 34 | 1 | 0    | 1  | 1  | 1    | 1 | 1 | 1 | 9 | 2 | not found                                                                        |  |

median  
amstar: 8

Characteristics of stakeholder involvement in systematic and rapid reviews: Study characteristics

General Information

| Study type                     | Study ID | Year of study | version number | Citation                                                                                                                                                                                                                                                        | Institution performing review                                                                                                              | country | year | contact details, corresponding author (not shown) | specific topic                               | Thematic Focus | Type of intervention       | Setting specified                     | Setting            |
|--------------------------------|----------|---------------|----------------|-----------------------------------------------------------------------------------------------------------------------------------------------------------------------------------------------------------------------------------------------------------------|--------------------------------------------------------------------------------------------------------------------------------------------|---------|------|---------------------------------------------------|----------------------------------------------|----------------|----------------------------|---------------------------------------|--------------------|
| 15 Cochrane systematic reviews |          |               |                |                                                                                                                                                                                                                                                                 |                                                                                                                                            |         |      |                                                   |                                              |                |                            |                                       |                    |
| CSR                            | 101      | 2012          | 1              | Olsen O, Clausen JA. Planned hospital birth versus planned home birth. Cochrane Database of Systematic Reviews 2012, Issue 9. Art. No.: CD000352. DOI: 10.1002/14651858.CD000352.pub2.                                                                          | General Practice and Section of General Practice, Department of Public Health, University of                                               | DNK     | 2012 |                                                   | childbirth                                   | Treatment      | Type of birth              | birth setting hospital/home           | Multiple           |
| CSR                            | 102      | 2013          | 1              | Moi JHY, Sriranganathan MK, Edwards CJ, Buchbinder R. Lifestyle interventions for acute gout. Cochrane Database of Systematic Reviews 2013, Issue 11. Art. No.: CD010519. DOI: 10.1002/14651858.CD010519.pub2.                                                  | Department of Rheumatology, The Royal Melbourne Hospital, Parkville, Australia.                                                            | AUS     | 2013 |                                                   | Acute gout treatment                         | Treatment      | lifestyle interventions    | inpatients and outpatients            | multiple           |
| CSR                            | 103      | 2011          | 1              | Thomas RE, Lorenzetti D, Spragins W. Mentoring adolescents to prevent drug and alcohol use. Cochrane Database of Systematic Reviews 2011, Issue 11. Art. No.: CD007381. DOI: 10.1002/14651858.CD007381.pub2.                                                    | University of Calgary, Department of Medicine, Calgary, Alberta, Canada                                                                    | CAN     | 2011 |                                                   | drug/alcohol prevention                      | Prevention     | mentoring acts of any kind | mentoring programs                    | Multiple           |
| CSR                            | 104      | 2012          | 1              | Garrison SR, Allan GM, Sekhon RK, Musini VM, Khan KM. Magnesium for skeletal muscle cramps. Cochrane Database of Systematic Reviews 2012, Issue 9. Art. No.: CD009402. DOI: 10.1002/14651858.CD009402.pub2.                                                     | University of British Columbia, Vancouver, BC, Canada                                                                                      | CAN     | 2012 |                                                   | Skeltal muscle cramps                        | Treatment      | Magnesium supplementation  | outpatients (primary care, community) | Outpatient         |
| CSR                            | 105      | 2012          | update         | Tejani AM, Wasdell M, Spiwak R, Rowell G, Nathwani S. Carnitine for fatigue in multiple sclerosis. Cochrane Database of Systematic Reviews 2012, Issue 5. Art. No.: CD007280. DOI: 10.1002/14651858.CD007280.pub3.                                              | University of British Columbia, Vancouver, BC, Canada                                                                                      | CAN     | 2012 |                                                   | Multiple Sclerosis fatigue                   | Treatment      | Carnitine supplementation  | outpatients                           | Outpatient         |
| CSR                            | 106      | 2013          | update         | Taylor F, Huffman MD, Macedo AF, Moore THM, Burke M, Davey Smith G, Ward K, Ebrahim S. Statins for the primary prevention of cardiovascular disease. Cochrane Database of Systematic Reviews 2013, Issue 1. Art. No.: CD004816. DOI: 10.1002/14651858.CD004816. | University of British Columbia, Vancouver, BC, Canada & Tropical Medicine, Department of Non-communicable Disease Epidemiology, London, UK | GBR     | 2013 |                                                   | primary prevention of cardiovascular disease | Prevention     | statins                    | community setting                     | Community          |
| CSR                            | 107      | 2013          | update         | Jorge EC, Jorge EN, El Dib RP. Early light reduction for preventing retinopathy of prematurity in very low birth weight infants. Cochrane Database of Systematic Reviews 2013, Issue 8. Art. No.: CD000122. DOI: 10.1002/14651858.CD000122.pub2.                | Botucatu Medical School, Universidade Estadual Paulista (UNESP), Botucatu, São Paulo, Brazil                                               | BRA     | 2013 |                                                   | ROP prevention in premature infants          | Prevention     | light reduction            | hospital                              | Inpatient/Hospital |
| CSR                            | 108      | 2012          | 1              | Jin H, Leng Q, Li C. Dietary flavonoid for preventing colorectal neoplasms. Cochrane Database of Systematic Reviews 2012, Issue 8. Art. No.: CD009350. DOI: 10.1002/14651858.CD009350.pub2.                                                                     | University of Traditional Chinese Medicine, National Center of Colorectal Surgery, Nanjing, Jiangsu                                        | CHN     | 2012 |                                                   | colorectal neoplasm prevention               | Prevention     | Flavonoid intake           | community setting                     | Community          |

1  
2  
3  
4  
5  
6  
7  
8  
9  
10  
11  
12  
13  
14  
15  
16  
17  
18  
19  
20  
21  
22  
23  
24  
25  
26  
27  
28  
29  
30  
31  
32  
33  
34  
35  
36  
37  
38  
39  
40  
41  
42  
43  
44  
45  
46

**Stakeholder involvement SHI** **PRISMA**

**notable conflicts of interests of authors** **review protocol** **SHI: yes = 1, no = 0** **Procedure according to PRISMA-guidelines**

| Population               | N      | overall age range | sex | Funding (who?)                                                                                                                          | notable conflicts of interests of authors           | review protocol | SHI: yes = 1, no = 0 | Procedure according to PRISMA-guidelines |
|--------------------------|--------|-------------------|-----|-----------------------------------------------------------------------------------------------------------------------------------------|-----------------------------------------------------|-----------------|----------------------|------------------------------------------|
| Low risk pregnant women  | 11     | pregnant          | f   | governmental, institutional: National Institute for Health Research, UK.                                                                | none                                                | yes             |                      | 1                                        |
| adults with acute gout   | 19     | adult             | f/m | governmental, institutional                                                                                                             | none                                                | yes             |                      | 0                                        |
| adolescents              | 1994   | 13 - 18           | f/m | governmental, institutional                                                                                                             | none                                                | yes             |                      | 0                                        |
| adults                   | 406    | adult             | f/m | governmental, institutional: Canadian Institutes of Health Research                                                                     | and Khan are co-authors of a RCT which was included | yes             |                      | 0                                        |
| adults with MS diagnosed | 36     | adult             | f/m | institutional: Fraser Health Research Administration and Development Office, Department of Social Medicine, University of Bristol, UK., | none                                                | yes             |                      | 1                                        |
| adults                   | 56934  | adult             | f/m | institutional: University of Rochester, NY, USA., Department of                                                                         | none                                                | yes             |                      | 0                                        |
| Premature human infants  | 897    | premature         | f/m | institutional: University of Rochester, NY, USA., Department of                                                                         | served as a member of the Data Safety               | yes             |                      | 0                                        |
| adults                   | 390769 | adult             | f/m | governmental, institutional                                                                                                             | none                                                | yes             |                      | 0                                        |



|    |               |               |     |                         |                |                |     |
|----|---------------|---------------|-----|-------------------------|----------------|----------------|-----|
| 1  |               |               |     |                         |                |                |     |
| 2  | adults with   |               |     | institutional: National |                |                |     |
| 3  | past          |               |     | Institute for Health    |                |                |     |
| 4  | cardiovascul  | 2505 adult    | f/m | Research (NIHR)         | none           | yes            | 0   |
| 5  | ar event      |               |     | programme grant,        |                |                |     |
| 6  |               |               |     | institutional: Centre   |                |                |     |
| 7  | adults        | 390769 adult  | f/m | for Clinical            | none           | yes            | 0   |
| 8  |               |               |     | Intervention            |                |                |     |
| 9  |               |               |     | Research,               |                |                |     |
| 10 | adolescents   | 1139 < 19     | f/m | institutional: South    | none           | yes            | 0   |
| 11 | antidepressa  |               |     | African Medical         |                |                |     |
| 12 | nt-induced    |               |     | Research Council,       | previously     |                |     |
| 13 | sexual        |               |     | South Africa., Open     | acted as a     |                |     |
| 14 | dysfunction   | 1886 adult    | f/m | Department of           | temporary      | yes            | 0   |
| 15 | adults, low-  |               |     | Psychiatry, University  | consultant for |                |     |
| 16 | or middle-    |               |     | of Oxford, UK.,         |                |                |     |
| 17 | income        | 40309 adult   | f/m | institutional: World    |                |                |     |
| 18 | country       |               |     | Health Organization,    | none           | yes            | 0   |
| 19 | children 0 -  |               |     | Department of           |                |                |     |
| 20 | 12            | 288 0 - 12    | f/m | HIV/AIDS,               | and MT work    | for paediatric |     |
| 21 | patients > 13 |               |     |                         | health         | facilities     | yes |
| 22 | with NBS      |               |     | governmental,           |                |                |     |
| 23 | diagnosed     | 0 > 13        | f/m | institutional           |                |                | 1   |
| 24 | HIV patients  |               |     | institutional:          |                |                |     |
| 25 | with          |               |     | Fondazione              |                |                |     |
| 26 | cryptococcal  |               |     | I.R.C.C.S. Istituto     | none           | yes            | 0   |
| 27 | meningitis    | 337 adult     | f/m | Neurologico Carlo       |                |                |     |
| 28 | patients with |               |     | governmental,           |                |                |     |
| 29 | ischaemic/ha  |               |     | institutional:          | has received   |                |     |
| 30 | emorrhagic    | 8021 adult    | f/m | Cochrane HIV/AIDS       | speaker fees   |                |     |
| 31 | stroke or TIA |               |     | Review Group, USA.      | for talks on   | yes            | 0   |
| 32 | diabetic      |               |     | institutional: National |                |                |     |
| 33 | peripheral    | no            |     | Basic Research          |                |                |     |
| 34 | neuropathy    | restriction   | f/m | Program of China,       | none           | yes            | 0   |
| 35 | DPN           | 3639 s        |     | Centre for Evidence-    |                |                |     |
| 36 | alcoholic     |               |     | institutional: The      |                |                |     |
| 37 | steatosis,    |               |     | Copenhagen Trial        |                |                |     |
| 38 | fibrosis,     | 710 adult     | f/m | Unit, Denmark., The     | none           | yes            | 0   |
| 39 | hepatitis,    |               |     | Danish Medical          |                |                |     |
| 40 | healthy       |               |     | institutional:          | Jefferson was  |                |     |
| 41 | children      | 300000 0 - 16 | f/m | REGIONE                 | an ad hoc      |                |     |
| 42 |               |               |     | PIEMONTE ASL 20         | consultant for |                |     |
| 43 |               |               |     | ALESSANDRIA,            | F. Hoffman-    | yes            | 0   |



|    |               |         |             |     |                        |                       |          |  |   |
|----|---------------|---------|-------------|-----|------------------------|-----------------------|----------|--|---|
| 1  | consumers,    |         |             |     | institutional: State   | review                |          |  |   |
| 2  | health        |         |             |     | University of New      | authors were          |          |  |   |
| 3  | professionals |         |             |     | York at Buffalo, NY,   | also authors          |          |  |   |
| 4  | , policy      | 16342   | adult       | f/m | USA., Italian National | of one                | yes      |  | 0 |
| 5  | acquired (not |         |             |     | institutional: Primary |                       |          |  |   |
| 6  | familial)     |         |             |     | Healthcare Research    |                       |          |  |   |
| 7  | hypercholest  | 0       | adult       | f/m | Development            | none                  | yes      |  | 0 |
| 8  | erolaemia     |         |             |     | institutional: The     |                       |          |  |   |
| 9  | patients with |         |             |     | University of Hong     |                       |          |  |   |
| 10 | hematologica  |         | no          |     | Kong, Hong Kong,       |                       |          |  |   |
| 11 | l             |         | restriction |     | Cochrane               | none                  | yes      |  | 0 |
| 12 | malignancies  | 593     | s           | f/m | institutional: The     |                       |          |  |   |
| 13 | adults with   |         |             |     | Chinese University of  |                       |          |  |   |
| 14 | diagnosis of  |         |             |     | Hong Kong, Hong        |                       |          |  |   |
| 15 | acute or      | 0       | adult       | f/m | Kong.                  | none                  | yes      |  | 0 |
| 16 | chronic CHD   |         |             |     | governmental,          |                       |          |  |   |
| 17 | patients with |         |             |     | institutional: Leiden  |                       |          |  |   |
| 18 | lumbar        | 733     | adult       | f/m | University Medical     | none                  | yes      |  | 0 |
| 19 | stenosis      |         |             |     | Center, Netherlands.   |                       |          |  |   |
| 20 | adults with   |         |             |     | institutional:         | Carvajal was          |          |  |   |
| 21 | sickle cell   |         |             |     | Iberoamerican          | employed by           |          |  |   |
| 22 | disease       | 198     | adult       | f/m | Cochrane Center,       | Eli Lilly to run      |          |  | 1 |
| 23 | patients with |         |             |     | Spain., Cystic         | a four-hour           | yes      |  |   |
| 24 | hepatic       |         |             |     | institutional:         |                       |          |  |   |
| 25 | encephalopa   |         |             |     | Copenhagen Trial       |                       |          |  |   |
| 26 | thy           | 144     | adult       | f/m | Unit, Denmark., The    | none                  | yes      |  | 0 |
| 27 | patients with |         |             |     | 1991 Pharmacy          | contributed to        |          |  |   |
| 28 | irritable     |         |             |     | institutional:         | the design            |          |  |   |
| 29 | bowel         | 213     | adult       | f/m | University of Leeds,   | and                   |          |  |   |
| 30 | syndrome      |         |             |     | Research Institute,    | management            | yes      |  | 0 |
| 31 | and adults    |         |             |     | institutional: Centre  |                       |          |  |   |
| 32 | with fever or | not     | no          |     | for Evidence-Based     |                       |          |  |   |
| 33 | malaria       | mention | restriction |     | Health Care,           |                       |          |  |   |
| 34 | symptoms      | ed      | s           | f/m | Stellenbosch           | none                  | yes      |  | 0 |
| 35 | opium         |         |             |     | governmental,          |                       |          |  |   |
| 36 | dependend     |         |             |     | institutional: Tehran  |                       |          |  |   |
| 37 | adults        | 870     | adult       | f/m | University of Medical  | none                  | yes      |  | 0 |
| 38 | patients with |         |             |     | Sciences, Iran.        |                       |          |  |   |
| 39 | chronic heart |         |             |     | institutional:         | universities, British | none     |  |   |
| 40 | failure       | 136182  | adult       | f/m | Heart Foundation       | not                   | mentione |  | 0 |
| 41 |               |         |             |     | Project Grant,         | mentioned             | d        |  | 0 |
| 42 |               |         |             |     |                        |                       |          |  |   |
| 43 |               |         |             |     |                        |                       |          |  |   |
| 44 |               |         |             |     |                        |                       |          |  |   |
| 45 |               |         |             |     |                        |                       |          |  |   |
| 46 |               |         |             |     |                        |                       |          |  |   |





|    |                |           |             |               |                         |           |          |   |   |
|----|----------------|-----------|-------------|---------------|-------------------------|-----------|----------|---|---|
| 1  |                |           |             |               |                         |           |          |   |   |
| 2  | patients       |           |             |               |                         |           |          |   |   |
| 3  | treated with   |           |             | governmental, |                         |           |          |   |   |
| 4  | face mask      | 936       | adult       | f/m           | institutional           | none      | yes      | 0 | 1 |
| 5  | covered by     |           |             |               |                         |           |          |   |   |
| 6  | private or     | not       | no          |               | governmental,           |           | yes (not |   |   |
| 7  | public         | mention   | restriction | f/m           | institutional,          | not       | mentione | 1 | 1 |
| 8  | insurance      | ed        | s           |               | institutional           | mentioned | d)       |   |   |
| 9  | patients with  |           |             |               |                         |           | none     |   |   |
| 10 | type 2         |           |             |               | governmental,           |           | mentione |   |   |
| 11 | diabetes       | 23182     | adult       | f/m           | institutional           | none      | d        | 0 | 0 |
| 12 | diagnosed      |           |             |               |                         |           |          |   |   |
| 13 | with           |           |             |               |                         |           | none     |   |   |
| 14 | posttraumati   |           |             |               | governmental,           | not       | mentione |   |   |
| 15 | c stress       | 354       | > 14        | f/m           | institutional           | mentioned | d        | 0 | 1 |
| 16 | individuals    |           |             |               | institutional: National |           | yes (not |   |   |
| 17 | with BMI >     |           |             |               | Health andMedical       |           | mentione |   |   |
| 18 | 30             | 4650877   | adult       | f/m           | Australia               | none      | d)       | 1 | 1 |
| 19 | patients       |           |             |               |                         |           |          |   |   |
| 20 | suffering      |           |             |               | governmental,           | not       |          |   |   |
| 21 | from dyslexia  | 2726      | 6 to 36     | f/m           | institutional           | mentioned | no       | 0 | 1 |
| 22 |                |           |             |               | governmental,           |           | none     |   |   |
| 23 | Population     | not       | no          |               | institutional: National | not       | mentione |   |   |
| 24 | adults         | mentioned | restriction | f/m           | Cancer research         | mentioned | d        | 0 | 1 |
| 25 | receiving      |           |             |               | institute, UK           |           |          |   |   |
| 26 | treatment for  | not       |             |               |                         |           |          |   |   |
| 27 | depression     | mentioned | adult       | f/m           | governmental,           | none      | yes      | 0 | 0 |
| 28 | women with     |           |             |               | institutional           |           |          |   |   |
| 29 | breast         |           |             |               |                         |           | none     |   |   |
| 30 | cancer         |           |             |               | governmental,           |           | mentione |   |   |
| 31 | stages I - III | 207       | adult       | f             | institutional           | none      | d        | 0 | 1 |
| 32 | patients > 65  |           |             |               |                         |           | none     |   |   |
| 33 | discharged     |           |             |               | governmental,           | not       | mentione |   |   |
| 34 | from hospital  | 8440      | > 65        | f/m           | institutional           | mentioned | d        | 0 | 0 |
| 35 |                |           |             |               | institutional,          |           | none     |   |   |
| 36 | pregnant       |           |             |               | supported by Tri-       |           | mentione |   |   |
| 37 | women          | 2836410   | s           | f             | Council for Nursing     | not       | d        | 0 | 0 |
| 38 | patients with  |           |             |               | and the Advanced        | mentioned |          |   |   |
| 39 | low-risk       |           |             |               |                         |           |          |   |   |
| 40 | prostate       | not       |             |               | governmental,           |           | mentione |   |   |
| 41 | cancer         | mentioned | adult       | m             | institutional           | none      | d        | 0 | 1 |



|    |                |          |             |     |                          |                |  |          |     |
|----|----------------|----------|-------------|-----|--------------------------|----------------|--|----------|-----|
| 1  |                |          |             |     | institutional: Agency    |                |  |          |     |
| 2  |                |          |             |     | for Healthcare           |                |  |          |     |
| 3  |                | not      |             |     | Research and             |                |  | yes (not |     |
| 4  | children       | mention  | children    | f/m | Quality, US              | none           |  | mentione |     |
| 5  |                | ed       |             |     |                          |                |  | d)       | 1 1 |
| 6  |                |          |             |     |                          | has received   |  |          |     |
| 7  | adults         |          | 74536 adult | f/m | governmental,            | speaking       |  | yes (not |     |
| 8  |                |          |             |     | institutional            | from           |  | mentione |     |
| 9  |                |          | no          |     | institutional:           | the University |  | d)       | 1 1 |
| 10 | Population     |          | restriction | f/m | University of Otago      | of Otago,      |  |          |     |
| 11 | patients with  | 517844 s |             |     | and the Riddet           | Riddet         |  | yes      | 1 1 |
| 12 | primary        |          |             |     | Institute, a New         | Institute, and |  |          |     |
| 13 | hypothyreosi   |          |             |     |                          |                |  |          |     |
| 14 | s              | 1379     | 16 - 80     | f/m | governmental,            | not            |  | none     |     |
| 15 | with           |          |             |     | institutional            | mentioned      |  | mentione | 0 1 |
| 16 | diagnosed      |          |             |     | institutional: Victorian |                |  | d)       |     |
| 17 | agenesis of    |          |             |     | Government's             |                |  |          |     |
| 18 | Corpus         | 110      | 0 - 73      | f/m | Operational              | not            |  | none     |     |
| 19 |                |          |             |     | Infrastructure           | mentioned      |  | mentione | 0 0 |
| 20 | children and   |          |             |     | governmental,            |                |  | d)       |     |
| 21 | adolescents    | 4648420  | 0 - 18      | f/m | institutional: NIHR      | none           |  | yes      | 0 1 |
| 22 | early- stage   |          |             |     | HTA Programme,           |                |  |          |     |
| 23 | breast         |          |             |     | institutional: Ministry  |                |  |          |     |
| 24 | cancer         |          |             |     | of Education, Culture,   |                |  | none     |     |
| 25 | patients       | 1159     | adult       | f   | Sports, Science and      | not            |  | mentione | 0 1 |
| 26 | (some          |          |             |     | Technology in Japan      | mentioned      |  | d)       |     |
| 27 | undernourish   |          |             |     |                          |                |  |          |     |
| 28 | ed, some       |          |             |     | governmental,            | not            |  | yes (not |     |
| 29 | well           | 2485     | > 59        | m/f | institutional            | mentioned      |  | mentione | 0 0 |
| 30 | people with    |          |             |     |                          |                |  | d)       |     |
| 31 | primary        |          |             |     | governmental,            |                |  | yes (not |     |
| 32 | cancer         |          |             |     | institutional            | not            |  | mentione |     |
| 33 | diagnosis      | 648      | adult       | m/f |                          | mentioned      |  | d)       | 0 1 |
| 34 | school,        |          |             |     | institutional:           |                |  |          |     |
| 35 | primary and    | not      |             |     | Canadian Institutes      |                |  | yes (not |     |
| 36 | secondary      | mention  |             |     | for Health               |                |  | mentione |     |
| 37 | school)        | ed       | < 18        | m/f | Research/Drug            | none           |  | d)       | 0 0 |
| 38 | patients with  |          |             |     |                          |                |  |          |     |
| 39 | type 2         |          |             |     | Canadian Institutes      |                |  |          |     |
| 40 | diabetes       | 2967     | adult       | m/f | for Health               | none           |  | yes      | 1 1 |
| 41 |                |          |             |     | Research/Drug            |                |  |          |     |
| 42 |                |          |             |     |                          |                |  |          |     |
| 43 |                |          |             |     | governmental,            |                |  |          |     |
| 44 | no restriction | 18933    | s           | m/f | institutional            | none           |  | no       | 0 0 |
| 45 |                |          |             |     |                          |                |  |          |     |
| 46 |                |          |             |     |                          |                |  |          |     |

1  
2  
3  
4  
5  
6  
7  
8  
9  
10  
11  
12  
13  
14  
15  
16  
17  
18  
19  
20  
21  
22  
23  
24  
25  
26  
27  
28  
29  
30  
31  
32  
33  
34  
35  
36  
37  
38  
39  
40  
41  
42  
43  
44  
45  
46

|    |     |      |   |                                                                                                                                                                                                                                                                                |                                                                                                                                         |     |      |                      |                 |                                                 |                            |            |
|----|-----|------|---|--------------------------------------------------------------------------------------------------------------------------------------------------------------------------------------------------------------------------------------------------------------------------------|-----------------------------------------------------------------------------------------------------------------------------------------|-----|------|----------------------|-----------------|-------------------------------------------------|----------------------------|------------|
| SR | 156 | 2013 | 1 | Ian C. Scott, Rachael Tan, Daniel Stahl, Sophia Steer, Cathryn M. Lewis, and Andrew P. Cope The protective effect of alcohol on developing rheumatoid arthritis: a systematic review and meta-analysis Rheumatology (2013) 52 (5): 856-867 first published online 15 June 2013 | Cellular Biology of Inflammation, Department of Medical and Molecular Genetics, Guy's Hospital, St Thomas' Hospital, London SE1 1UL, UK | GBR | 2013 | rheumatoid arthritis | community-based | alcohol intake                                  | community setting          | Community  |
| SR | 157 | 2014 | 1 | Hu MB, Xu H, Bai PD, et al. Obesity has multifaceted impact on biochemical recurrence of prostate cancer: a dose-response meta-analysis of 36,927 patients. Med Oncol 2014; 31:829. DOI: 10.1007/s12032-013-0829-8                                                             | Huashan Hospital, Fudan University, No.12 Wulumuqi Road, Shanghai, 200040, China                                                        | CHN | 2014 | prostate cancer      | Prevention      | assessing effect of obesity (BMI) on recurrence | clinical setting           | Outpatient |
| SR | 158 | 2014 | 1 | Blasco, M.A., Redleaf, M.I., 2014. Cochlear implantation in unilateral sudden deafness improves tinnitus and speech comprehension: meta-analysis and systematic review. Otol. Neurotol. 35 (8), 1426-1432. DOI: 10.1097/MAO.0000000000000431                                   | College of Medicine, University of Illinois at Chicago, Chicago, Illinois                                                               | USA | 2014 | cochlear implants    | Treatment       | hearing loss                                    | outpatients                | Outpatient |
| SR | 159 | 2014 | 1 | Physical Activity in Overweight and Obese Adolescents: Systematic Review of the Effects on Physical Fitness Components and Cardiovascular Risk Factors SPORTS MEDICINE Volume: 44 Issue: 8 Pages: 1139-1152 Published: AUG 2014                                                | Janeiro, Lab Phys Act & Hlth Promot, Inst Phys Educ & Sports, BR-20550013 Rio De Janeiro,                                               | BRA | 2014 | obesity prevention   | Prevention      | physical activity                               | community, therapy setting | Multiple   |
| SR | 160 | 2015 | 1 | Gibbs et al., 2014, M. Gibbs, C. Winsper, S. Marwaha, E. Gilbert, M. Broome, S.P. Singh, Cannabis use and mania symptoms: a systematic review and meta-analysis J. Affect. Disord., 171C (2014), pp. 39–47, doi:10.1016/j.jad.2014.09.016                                      | Division of Mental Health and Wellbeing, Warwick Medical School, University of Warwick, CV4 7AL, UK                                     | GBR | 2015 | cannabis use         | community-based | cannabis use and association with mania         | community setting          | Community  |

Rapid reviews

|    |               |       |         |     |                          |              |          |     |
|----|---------------|-------|---------|-----|--------------------------|--------------|----------|-----|
| 1  |               |       |         |     |                          |              |          |     |
| 2  |               |       |         |     | undertaking a            |              |          |     |
| 3  | drinkers/non- | 96462 | adult   | m/f | governmental,            | clinical re- | none     |     |
| 4  | drinkers      |       |         |     | institutional: Arthritis | search       | mentione |     |
| 5  | patients with |       |         |     | Research UK              | fellowship,  | d        | 0 0 |
| 6  | primary       |       |         |     | governmental,            |              |          |     |
| 7  | prostate      | 36927 | adult   | m   | institutional: National  |              | none     |     |
| 8  | cancer        |       |         |     | Natural Science          |              | mentione |     |
| 9  | patients with |       |         |     | Foundation of China      | none         | d        | 0 0 |
| 10 | unilateral    |       |         |     |                          |              |          |     |
| 11 | hearing loss  | 36    | adult   | m/f | governmental,            |              | none     |     |
| 12 | overweight    |       |         |     | institutional            | none         | mentione |     |
| 13 | and obese     |       |         |     | institutional: Carlos    |              | d        | 0 0 |
| 14 | adolescents   | 1616  | 12 - 17 | m/f | Chagas Filho             |              |          |     |
| 15 | who had       |       |         |     | Foundation for the       | none         | mentione |     |
| 16 | experienced   |       |         |     | Research Support in      | none         | d        | 0 1 |
| 17 | mania         |       |         |     |                          |              |          |     |
| 18 | symptoms      | 2391  | > 12    | m/f | governmental,            |              | yes (not |     |
| 19 |               |       |         |     | institutional            | none         | mentione |     |
| 20 |               |       |         |     |                          |              | d)       | 0 1 |





|    |                 |             |             |               |                         |                |            |   |
|----|-----------------|-------------|-------------|---------------|-------------------------|----------------|------------|---|
| 1  |                 |             |             |               |                         |                |            |   |
| 2  | Anesthesia      | no          |             |               |                         |                |            |   |
| 3  | patients of all | restriction |             | governmental, | not                     | no             |            |   |
| 4  | ages            | 3538        | s           | m/f           | institutional           | mentioned      | protocol   | 1 |
| 5  | adults with     |             |             |               | governmental,           |                |            |   |
| 6  | severe          | not         |             |               | institutional:          |                |            |   |
| 7  | mental          | mention     |             |               | Canadian Psychiatric    |                | no         |   |
| 8  | illness SMI     | ed          | adult       | m/f           | Association             | none           | protocol   | 0 |
| 9  |                 |             |             |               | institutional: Cancer   |                |            |   |
| 10 |                 | not         |             |               | Care Ontario,           |                | none       |   |
| 11 | adults          | mentioned   | adult       | m/f           | Ministry of Health      | not            | mentioned  | 1 |
| 12 | patients in     | >           | no          |               | and Long-Term Care      | mentioned      |            |   |
| 13 | emergency       | 1700000     | restriction |               | governmental,           |                |            |   |
| 14 | department      | 0           | s           | m/f           | institutional           | none           | yes        | 1 |
| 15 | repeatedly      |             |             |               |                         |                |            |   |
| 16 | visiting ED     | not         | no          |               | governmental,           |                | none       |   |
| 17 | within 48 or    | mentioned   | restriction |               | institutional           | none           | mentioned  | 0 |
| 18 | 72h             | ed          | s           | m/f           |                         |                |            |   |
| 19 | patients        |             |             |               |                         |                |            |   |
| 20 | undergoing      |             |             |               | governmental,           | not            | none       |   |
| 21 | surgery         | 45516       | adult       | m             | institutional           | mentioned      | mentioned  | 0 |
| 22 | receiving       |             |             |               |                         |                |            |   |
| 23 | mental          | not         | no          |               | governmental,           |                | none       |   |
| 24 | health          | mentioned   | restriction |               | institutional           | none           | mentioned  | 0 |
| 25 | services        | ed          | s           | m/f           | institutional: Cancer   |                |            |   |
| 26 |                 |             |             |               | Care Ontario,           |                |            |   |
| 27 | Population      | not         | no          |               | Ministry of Health      | not            |            |   |
| 28 |                 | mentioned   | restriction |               | and Long-Term Care      | mentioned      | yes        | 0 |
| 29 | Patients with   |             |             |               | governmental,           |                | yes (not   |   |
| 30 | cancer          | mentioned   | restriction |               | institutional: Cancer   | not            | mentioned) | 0 |
| 31 |                 | ed          | s           | m/f           | Institute NSW           | mentioned      |            |   |
| 32 | patients with   |             |             |               |                         |                |            |   |
| 33 | chronic pain    |             |             |               | governmental,           |                | yes (not   |   |
| 34 | symptoms        | 2418        | adult       | m/f           | institutional           | none           | mentioned) | 1 |
| 35 |                 |             |             |               | institutional; National |                |            |   |
| 36 | adolescent      |             | adolescen   |               | Institute for Health    | the authors of | none       |   |
| 37 | girls           | 16744       | t           | f             | Research (NIHR), UK     | The Marmot     | mentioned  |   |
| 38 |                 |             |             |               | Clinical Research       | Society        |            |   |
| 39 |                 |             |             |               | institutional: National |                |            |   |
| 40 | Population      | not         | no          |               | Institute for Health    |                | none       |   |
| 41 |                 | mentioned   | restriction |               | and Clinical            |                | mentioned  |   |
| 42 |                 | ed          | s           | m/f           | Excellence (NICE),      | none           |            | 0 |



|    |                 |         |             |     |                          |               |          |   |
|----|-----------------|---------|-------------|-----|--------------------------|---------------|----------|---|
| 1  | patients        |         |             |     |                          |               |          |   |
| 2  | suffering       |         |             |     |                          |               | none     |   |
| 3  | from chronic    |         |             |     | governmental,            |               | mentione |   |
| 4  | pain            | 711     | adult       | m/f | institutional            | none          | d        | 0 |
| 5  |                 |         |             |     |                          |               |          |   |
| 6  | general         |         | no          |     | governmental,            |               | yes (not |   |
| 7  | population      | 115613  | restriction | m/f | institutional            | none          | d)       | 1 |
| 8  | participants    |         |             |     | institutional: Policy    |               |          |   |
| 9  | requesting      | not     | no          |     | Research                 |               | yes (not |   |
| 10 | cosmetic        | mention | restriction | m/f | Programme in the         |               | mentione |   |
| 11 | procedures      | ed      | s           |     | Department of Health     | none          | d)       | 1 |
| 12 |                 |         |             |     | institutional:           |               |          |   |
| 13 | children 0–5    | not     |             |     | SCPHRP is funded         |               | none     |   |
| 14 | years           | mention | 0 - 5       | m/f | by the Medical           | not           | mentione |   |
| 15 |                 |         |             |     | Research Council         | mentioned     | d        | 0 |
| 16 | general         |         |             |     | institutional: British   |               |          |   |
| 17 | population      | not     | no          | m/f | Heart Foundation,        |               | none     |   |
| 18 |                 | mention | restriction |     | Economic and Social      |               | mentione |   |
| 19 |                 | ed      | s           |     | Research Council,        | none          | d        | 0 |
| 20 | school age      |         |             |     |                          |               |          |   |
| 21 | children        | 2717    | 2 - 13      | m/f | governmental,            |               | yes (not |   |
| 22 | patients        |         |             |     | institutional            | none          | d)       | 0 |
| 23 | suffering       |         |             |     |                          |               |          |   |
| 24 | from chronic    |         |             |     | governmental,            |               | none     |   |
| 25 | pain            | 1087    | adult       | m/f | institutional            | none          | mentione | 0 |
| 26 | healthcare      | not     |             |     | governmental,            |               |          |   |
| 27 | providers       | mention | adult       | m/f | institutional: NIHR      |               | yes      | 1 |
| 28 | patients with   | ed      |             |     | CLAHRC for Leeds,        | none          |          |   |
| 29 | and without     |         |             |     | York & Bradford          |               |          |   |
| 30 | intellectual    |         |             |     | institutional: National  |               |          |   |
| 31 | disabilities    | 4721    | > 2         | m/f | Institute for Health     | none          | yes      | 0 |
| 32 |                 |         |             |     | Research (NIHR)          |               |          |   |
| 33 | adult women     |         |             |     | institutional: Hull York |               | yes (not |   |
| 34 | with live birth | 506     | adult       | f   | Medical School           |               | mentione |   |
| 35 |                 |         |             |     | (HYMS), University of    | none          | d)       | 0 |
| 36 | adult health    | not     |             |     | York, York               |               |          |   |
| 37 | service users   | mention | adult       | m/f | institutional:           |               | yes (not |   |
| 38 |                 | ed      |             |     | European Centre for      | not           | mentione |   |
| 39 | Population      |         |             |     | Disease Prevention       | mentioned     | d)       | 1 |
| 40 |                 |         |             |     | and Control (ECDC)       |               |          |   |
| 41 |                 |         |             |     | institutional: Health    |               |          |   |
| 42 |                 |         |             |     | Protection Agency        | funding for   |          |   |
| 43 |                 | not     | no          | m/f | (HPA) and the            | influenza-    |          |   |
| 44 |                 | mention | restriction |     | Department of            | related       |          |   |
| 45 |                 | ed      | s           |     | Department of            | research from |          | 1 |
| 46 |                 |         |             |     |                          |               |          |   |



|    |               |              |     |                                 |                  |                            |   |
|----|---------------|--------------|-----|---------------------------------|------------------|----------------------------|---|
| 1  |               |              |     |                                 |                  |                            |   |
| 2  | alcohol-      |              |     |                                 |                  |                            |   |
| 3  | associated    |              |     |                                 |                  |                            |   |
| 4  | violence      | 1265 > 14    | m/f | governmental,<br>institutional  | not<br>mentioned | yes (not<br>mentione<br>d) | 0 |
| 5  | problems      |              |     |                                 |                  |                            |   |
| 6  |               |              |     |                                 |                  | none                       |   |
| 7  | Patients with | 102 adult    | m/f | governmental,<br>institutional  | none             | mentione<br>d              | 0 |
| 8  | vertigo       |              |     |                                 |                  |                            |   |
| 9  | patients at   | no           |     | governmental,<br>institutional: | is a             | contributing               |   |
| 10 | emergency     | restriction  |     | Canadian Institutes             | editor for       | no                         |   |
| 11 | department    | 9963 s       | m/f | of Health Research              | Open             | protocol                   | 1 |
| 12 |               | not          |     |                                 |                  |                            |   |
| 13 | cancer        | mention      |     | governmental,<br>institutional  | not              | no                         |   |
| 14 | patients      | ed adult     | m/f |                                 | mentioned        | protocol                   | 1 |
| 15 | healthy       |              |     | institutional: Defense          |                  |                            |   |
| 16 | poplation or  |              |     | Health Program and              |                  |                            |   |
| 17 | patients with | 1903 adult   | m/f | USUHS, Consortium               | none             | not<br>published           | 1 |
| 18 | insomnia      |              |     | for Health and                  |                  |                            |   |
| 19 | patients with |              |     | governmental,<br>institutional  |                  | yes (not<br>mentione<br>d) |   |
| 20 | chronic pain  | 3561 adult   | m/f |                                 | none             |                            | 1 |
| 21 | symptoms      |              |     |                                 |                  |                            |   |
| 22 |               |              |     |                                 |                  |                            |   |
| 23 |               |              |     |                                 |                  |                            |   |
| 24 |               |              |     |                                 |                  |                            |   |
| 25 |               |              |     |                                 |                  | none                       |   |
| 26 | COPD          |              |     | governmental,<br>institutional  | none             | mentione<br>d              | 1 |
| 27 | patients      | 176 adult    | m/f |                                 |                  |                            |   |
| 28 |               |              |     |                                 |                  |                            |   |
| 29 | hip fracture  |              |     | governmental,<br>institutional  | none             | none<br>mentione<br>d      | 1 |
| 30 | patients      | 195 > 65     | m/f |                                 |                  |                            |   |
| 31 |               |              |     |                                 |                  |                            |   |
| 32 | patients with |              |     | governmental,<br>institutional  | none             | none<br>mentione<br>d      | 1 |
| 33 | heart failure | 3318 > 53    | m/f |                                 |                  |                            |   |
| 34 |               |              |     |                                 |                  |                            |   |
| 35 |               |              |     |                                 |                  | none                       |   |
| 36 | surgery       |              |     | governmental,<br>institutional  | none             | mentione<br>d              | 1 |
| 37 | patients      | 372746 adult | m/f |                                 |                  |                            |   |
| 38 |               |              |     |                                 |                  |                            |   |
| 39 | patients with |              |     | governmental,<br>institutional  | none             | none<br>mentione<br>d      | 1 |
| 40 | CAP           | 0 adult      | f/m |                                 |                  |                            |   |



|    |               |         |          |     |                       |           |          |   |
|----|---------------|---------|----------|-----|-----------------------|-----------|----------|---|
| 1  | patients      |         |          |     |                       |           |          |   |
| 2  | being         |         |          |     |                       | none      |          |   |
| 3  | discharged    |         |          |     | governmental,         | mentione  |          |   |
| 4  | from hospital | 0       | adult    | f/m | institutional         | d         | none     | 1 |
| 5  |               |         |          |     |                       |           |          |   |
| 6  | patients with | not     |          |     |                       |           | none     |   |
| 7  | CAP           | mention | adult    | m/f | governmental,         | mentione  | d        | 1 |
| 8  |               | ed      |          |     | institutional         |           |          |   |
| 9  |               |         |          |     |                       |           | none     |   |
| 10 | patients with |         |          |     |                       |           | mentione |   |
| 11 | COPD          | 574     | adult    | m/f | governmental,         | d         | none     | 1 |
| 12 |               |         |          |     | institutional         |           |          |   |
| 13 | patients with |         |          |     |                       |           | none     |   |
| 14 | COPD          | ca 400  | > 40     | m/f | governmental,         | d         | mentione | 1 |
| 15 |               |         |          |     | institutional         |           |          |   |
| 16 | children 11 - |         |          |     |                       |           | none     |   |
| 17 | 18            | ca 3500 | 11 to 18 | m/f | funded by Lambeth     | not       | mentione |   |
| 18 |               |         |          |     | PCT                   | mentioned | d        | 0 |
| 19 |               |         |          |     |                       |           |          |   |
| 20 | heart failure |         |          |     |                       |           | none     |   |
| 21 | patients      | 296     | adult    | m/f | governmental,         | d         | mentione | 1 |
| 22 |               |         |          |     | institutional         |           |          |   |
| 23 | postacute     | not     |          |     |                       |           | none     |   |
| 24 | stroke        | mention | adult    | m/f | governmental,         | d         | mentione | 1 |
| 25 | patients      | ed      |          |     | institutional         |           |          |   |
| 26 |               |         |          |     |                       |           | none     |   |
| 27 | patients with |         |          |     |                       |           | mentione |   |
| 28 | hip fracture  | 0       | adult    | f/m | governmental,         | d         |          | 1 |
| 29 | post-acute    |         |          |     | institutional         |           |          |   |
| 30 | stroke, CHF,  | not     |          |     |                       |           | none     |   |
| 31 | and COPD      | mention | adult    | m/f | governmental,         | d         | mentione | 1 |
| 32 | patients      | ed      |          |     | institutional         |           |          |   |
| 33 |               |         |          |     |                       |           | none     |   |
| 34 | adults        | 895     | adult    | m/f | governmental,         | d         | mentione | 1 |
| 35 |               |         |          |     | institutional         |           |          |   |
| 36 | patients at   |         |          |     |                       |           | none     |   |
| 37 | the end of    |         |          |     |                       |           | mentione |   |
| 38 | life          | 1836    | adult    | m/f | governmental,         | d         |          | 1 |
| 39 |               |         |          |     | institutional,        |           |          |   |
| 40 | acute         |         |          |     | institutional: funded |           |          |   |
| 41 | hospital      |         |          |     | by the HS&DR          |           |          |   |
| 42 | patients      | 142899  | adult    | m/f | programme, NIHR       | none      | yes      | 0 |



|    |        |     |      |   |                                                                                                                                                                                                                                                                                                                                                                                                                   |                                                                                       |     |      |                                         |                 |                                          |                                               |                    |
|----|--------|-----|------|---|-------------------------------------------------------------------------------------------------------------------------------------------------------------------------------------------------------------------------------------------------------------------------------------------------------------------------------------------------------------------------------------------------------------------|---------------------------------------------------------------------------------------|-----|------|-----------------------------------------|-----------------|------------------------------------------|-----------------------------------------------|--------------------|
| 1  |        |     |      |   | Wang M. Airway clearance techniques for patients with stable chronic obstructive pulmonary disease (COPD): a rapid review. Toronto: Health Quality Ontario; 2015 February. 23 p. Available from:                                                                                                                                                                                                                  | Health Quality Ontario, <a href="http://www.hqontario.ca">http://www.hqontario.ca</a> | CAN | 2015 | COPD management                         | Treatment       | airway clearance techniques              | outpatients                                   | Outpatient         |
| 2  |        |     |      |   | Health Quality Ontario. Exercise programs after pulmonary rehabilitation for patients with chronic obstructive pulmonary disease (COPD). Toronto: Health Quality Ontario; 2015 February. 20 p. Available from:                                                                                                                                                                                                    | Health Quality Ontario, <a href="http://www.hqontario.ca">http://www.hqontario.ca</a> | CAN | 2015 | COPD rehabilitation                     | Treatment       | exercise programs                        | community setting (exercise)                  | Community          |
| 3  |        |     |      |   | Health Quality Ontario. Respiratory services in home care for individuals with chronic obstructive pulmonary disease (COPD): a rapid review. Toronto: Health Quality Ontario; 2015 February. 20 p. Available from:                                                                                                                                                                                                | Health Quality Ontario, <a href="http://www.hqontario.ca">http://www.hqontario.ca</a> | CAN | 2015 | respiratory rehabilitation              | Treatment       | respiratory therapy                      | therapy setting                               | Outpatient         |
| 4  | CRD RF | 208 | 2015 | 1 | <a href="http://www.hqontario.ca/evidence/evidence-process/episodes-of-care#community-chf">http://www.hqontario.ca/evidence/evidence-process/episodes-of-care#community-chf</a>                                                                                                                                                                                                                                   | Health Quality Ontario, <a href="http://www.hqontario.ca">http://www.hqontario.ca</a> | CAN | 2015 | COPD management                         | Treatment       | airway clearance techniques              | outpatients                                   | Outpatient         |
| 5  |        |     |      |   | Health Quality Ontario. Exercise programs after pulmonary rehabilitation for patients with chronic obstructive pulmonary disease (COPD). Toronto: Health Quality Ontario; 2015 February. 20 p. Available from:                                                                                                                                                                                                    | Health Quality Ontario, <a href="http://www.hqontario.ca">http://www.hqontario.ca</a> | CAN | 2015 | COPD rehabilitation                     | Treatment       | exercise programs                        | community setting (exercise)                  | Community          |
| 6  | CRD RF | 209 | 2015 | 1 | <a href="http://www.hqontario.ca/evidence/evidence-process/episodes-of-care#community-chf">http://www.hqontario.ca/evidence/evidence-process/episodes-of-care#community-chf</a>                                                                                                                                                                                                                                   | Health Quality Ontario, <a href="http://www.hqontario.ca">http://www.hqontario.ca</a> | CAN | 2015 | COPD rehabilitation                     | Treatment       | exercise programs                        | community setting (exercise)                  | Community          |
| 7  |        |     |      |   | Health Quality Ontario. Respiratory services in home care for individuals with chronic obstructive pulmonary disease (COPD): a rapid review. Toronto: Health Quality Ontario; 2015 February. 20 p. Available from:                                                                                                                                                                                                | Health Quality Ontario, <a href="http://www.hqontario.ca">http://www.hqontario.ca</a> | CAN | 2015 | respiratory rehabilitation              | Treatment       | respiratory therapy                      | therapy setting                               | Outpatient         |
| 8  | CRD RF | 210 | 2015 | 1 | <a href="http://www.hqontario.ca/evidence/evidence-process/episodes-of-care#community-chf">http://www.hqontario.ca/evidence/evidence-process/episodes-of-care#community-chf</a>                                                                                                                                                                                                                                   | Health Quality Ontario, <a href="http://www.hqontario.ca">http://www.hqontario.ca</a> | CAN | 2015 | COPD rehabilitation                     | Treatment       | exercise programs                        | community setting (exercise)                  | Community          |
| 9  |        |     |      |   | Health Quality Ontario. Optimal timing to begin an active rehabilitation program after a hip fracture: a rapid review. Toronto, ON: Health Quality Ontario; 2013 Apr. 20 p. Available from: <a href="http://www.hqontario.ca/evidence/publications-and-ohtac-recommendations/rapid-re">http://www.hqontario.ca/evidence/publications-and-ohtac-recommendations/rapid-re</a>                                       | Health Quality Ontario, <a href="http://www.hqontario.ca">http://www.hqontario.ca</a> | CAN | 2013 | rehabilitation after hip fracture       | Treatment       | active rehabilitation program            | rehabilitation setting                        | Inpatient/Hospital |
| 10 | CRD RF | 211 | 2013 | 1 | <a href="http://www.hqontario.ca/evidence/publications-and-ohtac-recommendations/rapid-reviews">http://www.hqontario.ca/evidence/publications-and-ohtac-recommendations/rapid-reviews</a>                                                                                                                                                                                                                         | Health Quality Ontario, <a href="http://www.hqontario.ca">http://www.hqontario.ca</a> | CAN | 2013 | rehabilitation after hip fracture       | Treatment       | active rehabilitation program            | rehabilitation setting                        | Inpatient/Hospital |
| 11 |        |     |      |   | Health Quality Ontario. Physical activity counselling: a rapid review. Toronto: Health Quality Ontario; 2015 February. 20 p. Available from: <a href="http://www.hqontario.ca/evidence/evidence-process/episodes-of-care#community-chf">http://www.hqontario.ca/evidence/evidence-process/episodes-of-care#community-chf</a>                                                                                      | Health Quality Ontario, <a href="http://www.hqontario.ca">http://www.hqontario.ca</a> | CAN | 2015 | coronary/stroke prevention              | Prevention      | statin administration                    | community setting                             | Community          |
| 12 | CRD RF | 212 | 2013 | 1 | <a href="http://www.hqontario.ca/evidence/evidence-process/episodes-of-care#community-chf">http://www.hqontario.ca/evidence/evidence-process/episodes-of-care#community-chf</a>                                                                                                                                                                                                                                   | Health Quality Ontario, <a href="http://www.hqontario.ca">http://www.hqontario.ca</a> | CAN | 2015 | coronary/stroke prevention              | Prevention      | statin administration                    | community setting                             | Community          |
| 13 |        |     |      |   | Health Quality Ontario. Cognitive-behavioural therapy for anxiety and depression in patients with COPD: a rapid review. Toronto: Health Quality Ontario; 2015 February. 21 p. Available from: <a href="http://www.hqontario.ca/evidence/evidence-process/episodes-of-care#community-chf">http://www.hqontario.ca/evidence/evidence-process/episodes-of-care#community-chf</a>                                     | Health Quality Ontario, <a href="http://www.hqontario.ca">http://www.hqontario.ca</a> | CAN | 2015 | secondary prevention of heart failure   | Prevention      | exercise counselling                     | community setting (exercise)                  | Community          |
| 14 | CRD RF | 213 | 2015 | 1 | <a href="http://www.hqontario.ca/evidence/evidence-process/episodes-of-care#community-chf">http://www.hqontario.ca/evidence/evidence-process/episodes-of-care#community-chf</a>                                                                                                                                                                                                                                   | Health Quality Ontario, <a href="http://www.hqontario.ca">http://www.hqontario.ca</a> | CAN | 2015 | secondary prevention of heart failure   | Prevention      | exercise counselling                     | community setting (exercise)                  | Community          |
| 15 |        |     |      |   | Health Quality Ontario. Cognitive-behavioural therapy for anxiety and depression in patients with COPD: a rapid review. Toronto: Health Quality Ontario; 2015 February. 21 p. Available from: <a href="http://www.hqontario.ca/evidence/evidence-process/episodes-of-care#community-chf">http://www.hqontario.ca/evidence/evidence-process/episodes-of-care#community-chf</a>                                     | Health Quality Ontario, <a href="http://www.hqontario.ca">http://www.hqontario.ca</a> | CAN | 2015 | anxiety and depression in COPD patients | Treatment       | cognitive-behavioural therapy (CBT)      | therapy setting                               | Outpatient         |
| 16 | CRD RF | 214 | 2015 | 1 | <a href="http://www.hqontario.ca/evidence/evidence-process/episodes-of-care#community-chf">http://www.hqontario.ca/evidence/evidence-process/episodes-of-care#community-chf</a>                                                                                                                                                                                                                                   | Health Quality Ontario, <a href="http://www.hqontario.ca">http://www.hqontario.ca</a> | CAN | 2015 | anxiety and depression in COPD patients | Treatment       | cognitive-behavioural therapy (CBT)      | therapy setting                               | Outpatient         |
| 17 |        |     |      |   | Health Quality Ontario. Cardiovascular and aerobic exercise in postacute stroke patients: a rapid review. Toronto, ON: Health Quality Ontario; 2015 February. 17 p. Available from: <a href="http://www.hqontario.ca/evidence/evidence-process/episodes-of-care#community-stroke">http://www.hqontario.ca/evidence/evidence-process/episodes-of-care#community-stroke</a>                                         | Health Quality Ontario, <a href="http://www.hqontario.ca">http://www.hqontario.ca</a> | CAN | 2015 | secondary prevention of stroke          | Treatment       | aerobic training/cardiovascular exercise | community setting (exercise)                  | Community          |
| 18 | CRD RF | 215 | 2015 | 1 | <a href="http://www.hqontario.ca/evidence/evidence-process/episodes-of-care#community-stroke">http://www.hqontario.ca/evidence/evidence-process/episodes-of-care#community-stroke</a>                                                                                                                                                                                                                             | Health Quality Ontario, <a href="http://www.hqontario.ca">http://www.hqontario.ca</a> | CAN | 2015 | secondary prevention of stroke          | Treatment       | aerobic training/cardiovascular exercise | community setting (exercise)                  | Community          |
| 19 |        |     |      |   | Health Quality Ontario. Aerobic exercise training in patients with heart failure: a rapid review. Toronto: Health Quality Ontario; 2015 February. 19 p. Available from: <a href="http://www.hqontario.ca/evidence/evidence-process/episodes-of-care#community-chf">http://www.hqontario.ca/evidence/evidence-process/episodes-of-care#community-chf</a>                                                           | Health Quality Ontario, <a href="http://www.hqontario.ca">http://www.hqontario.ca</a> | CAN | 2015 | secondary prevention of heart failure   | Prevention      | aerobic exercise                         | community setting (exercise)                  | Community          |
| 20 | CRD RF | 216 | 2015 | 1 | <a href="http://www.hqontario.ca/evidence/evidence-process/episodes-of-care#community-chf">http://www.hqontario.ca/evidence/evidence-process/episodes-of-care#community-chf</a>                                                                                                                                                                                                                                   | Health Quality Ontario, <a href="http://www.hqontario.ca">http://www.hqontario.ca</a> | CAN | 2015 | secondary prevention of heart failure   | Prevention      | aerobic exercise                         | community setting (exercise)                  | Community          |
| 21 |        |     |      |   | Health Quality Ontario. Care coordination for postacute stroke, chronic obstructive pulmonary disease, and heart failure clients: an economic rapid review. Toronto: Health Quality Ontario; 2015 February. 20 p. Available from: <a href="http://www.hqontario.ca/evidence/evidence-process/episodes-of-care#community-chf">http://www.hqontario.ca/evidence/evidence-process/episodes-of-care#community-chf</a> | Health Quality Ontario, <a href="http://www.hqontario.ca">http://www.hqontario.ca</a> | CAN | 2015 | post-acute stroke, COPD, or CHF         | Health Services | care coordination intervention           | hospital hospital to home (discharge-setting) | Inpatient/Hospital |
| 22 | CRD RF | 217 | 2015 | 1 | <a href="http://www.hqontario.ca/evidence/evidence-process/episodes-of-care#community-chf">http://www.hqontario.ca/evidence/evidence-process/episodes-of-care#community-chf</a>                                                                                                                                                                                                                                   | Health Quality Ontario, <a href="http://www.hqontario.ca">http://www.hqontario.ca</a> | CAN | 2015 | post-acute stroke, COPD, or CHF         | Health Services | care coordination intervention           | hospital hospital to home (discharge-setting) | Inpatient/Hospital |
| 23 |        |     |      |   | Health Quality Ontario. Medication reconciliation at discharge: a rapid review. Toronto: Health Quality Ontario; 2015 February. 24 p. Available from: <a href="http://www.hqontario.ca/evidence/evidence-process/episodes-of-care#community-chf">http://www.hqontario.ca/evidence/evidence-process/episodes-of-care#community-chf</a>                                                                             | Health Quality Ontario, <a href="http://www.hqontario.ca">http://www.hqontario.ca</a> | CAN | 2015 | Discharge procedure                     | Health Services | medication reconciliation                | (discharge-setting)                           | Different/other    |
| 24 | CRD RF | 218 | 2015 | 1 | <a href="http://www.hqontario.ca/evidence/evidence-process/episodes-of-care#community-chf">http://www.hqontario.ca/evidence/evidence-process/episodes-of-care#community-chf</a>                                                                                                                                                                                                                                   | Health Quality Ontario, <a href="http://www.hqontario.ca">http://www.hqontario.ca</a> | CAN | 2015 | Discharge procedure                     | Health Services | medication reconciliation                | (discharge-setting)                           | Different/other    |
| 25 |        |     |      |   | Health Quality Ontario. Inhospital physiotherapy for acute exacerbations of chronic obstructive pulmonary disease (AECOPD): a rapid review. Toronto, ON: Health Quality Ontario; 2012 Dec. 28 p. Available from: <a href="http://www.hqontario.ca/evidence/publications-and-ohtac-recommendations/rapid-re">http://www.hqontario.ca/evidence/publications-and-ohtac-recommendations/rapid-re</a>                  | Health Quality Ontario, <a href="http://www.hqontario.ca">http://www.hqontario.ca</a> | CAN | 2013 | acute exacerbating COPD                 | Treatment       | inhospital physiotherapy                 | hospital                                      | Inpatient/Hospital |
| 26 | CRD RF | 219 | 2013 | 1 | <a href="http://www.hqontario.ca/evidence/publications-and-ohtac-recommendations/rapid-re">http://www.hqontario.ca/evidence/publications-and-ohtac-recommendations/rapid-re</a>                                                                                                                                                                                                                                   | Health Quality Ontario, <a href="http://www.hqontario.ca">http://www.hqontario.ca</a> | CAN | 2013 | acute exacerbating COPD                 | Treatment       | inhospital physiotherapy                 | hospital                                      | Inpatient/Hospital |

|    |               |              |       |               |      |          |  |   |
|----|---------------|--------------|-------|---------------|------|----------|--|---|
| 1  |               |              |       |               |      |          |  |   |
| 2  |               |              |       |               |      |          |  |   |
| 3  | patients with |              |       | governmental, |      | none     |  |   |
| 4  | stable COPD   | 525 adult    | m/f   | institutional | none | mentione |  | 1 |
| 5  |               |              |       |               |      | d        |  |   |
| 6  | patients with | not          |       | governmental, |      | none     |  |   |
| 7  | COPD or       | mention      |       | institutional | none | mentione |  | 1 |
| 8  | pneumonia     | ed           | adult |               |      | d        |  |   |
| 9  | patients with |              |       | governmental, |      | none     |  |   |
| 10 | respiratory   |              |       | institutional | none | mentione |  | 1 |
| 11 | disease       | 37 adult     | m/f   |               |      | d        |  |   |
| 12 |               |              |       |               |      |          |  |   |
| 13 | patients with |              |       | governmental, |      | none     |  |   |
| 14 | hip fracture  | 339 adult    | m/f   | institutional | none | mentione |  | 1 |
| 15 |               |              |       |               |      | d        |  |   |
| 16 |               |              |       | governmental, |      | none     |  |   |
| 17 | adults        | 169921 adult | m/f   | institutional | none | mentione |  | 1 |
| 18 |               |              |       |               |      | d        |  |   |
| 19 | patients with |              |       | governmental, |      | none     |  |   |
| 20 | heart failure | 1628 adult   | m/f   | institutional | none | mentione |  | 1 |
| 21 |               |              |       |               |      | d        |  |   |
| 22 |               | not          |       | governmental, |      | none     |  |   |
| 23 | patients with | mention      |       | institutional | none | mentione |  | 1 |
| 24 | COPD          | ed           | adult |               |      | d        |  |   |
| 25 | postacute     |              |       | governmental, |      | none     |  |   |
| 26 | stroke        |              |       | institutional | none | mentione |  | 1 |
| 27 | patients      | 399 adult    | m/f   |               |      | d        |  |   |
| 28 |               |              |       |               |      |          |  |   |
| 29 | patients with |              |       | governmental, |      | none     |  |   |
| 30 | heart failure | 3662 adult   | m/f   | institutional | none | mentione |  | 1 |
| 31 | post-acute    |              |       |               |      | d        |  |   |
| 32 | stroke,       |              |       | governmental, |      | none     |  |   |
| 33 | COPD, or      |              |       | institutional | none | mentione |  | 1 |
| 34 | CHF           | 0 -          | f/m   |               |      | d        |  |   |
| 35 | being         |              |       |               |      |          |  |   |
| 36 | discharged,   |              |       | governmental, |      | none     |  |   |
| 37 | receiving     |              |       | institutional | none | mentione |  | 1 |
| 38 | medication    | 2447 adult   | m/f   |               |      | d        |  |   |
| 39 | patients with |              |       |               |      |          |  |   |
| 40 | acute         | not          |       | governmental, |      | none     |  |   |
| 41 | exacerbating  | mention      |       | institutional | none | mentione |  | 1 |
| 42 | COPD          | ed           | adult |               |      | d        |  |   |

Health Quality Ontario. Effectiveness and safety of thrombolytics for  
ischemic stroke: a rapid review. Toronto, ON: Health Quality Ontario; 2013  
Jan. 25 p. Available from: [http://www.hqontario.ca/evidence/publications-  
and-ohrac-recommendations/rapid-revi](http://www.hqontario.ca/evidence/publications-and-ohrac-recommendations/rapid-revi)

Health Quality Ontario,  
<http://www.hqontario.ca>

CAN 2013

treatment of  
ischemic stroke

Treatment

intravenous  
thrombolytics  
administration

hospital

Inpatient/  
Hospital

For peer review only

1  
2  
3  
4  
5  
6  
7  
8  
9  
10  
11  
12  
13  
14  
15  
16  
17  
18  
19  
20  
21  
22  
23  
24  
25  
26  
27  
28  
29  
30  
31  
32  
33  
34  
35  
36  
37  
38  
39  
40  
41  
42  
43  
44  
45  
46

|                                |      |       |     |                             |      |                |   |
|--------------------------------|------|-------|-----|-----------------------------|------|----------------|---|
| patients with ischaemic stroke | 6288 | adult | m/f | governmental, institutional | none | none mentioned | 1 |
|--------------------------------|------|-------|-----|-----------------------------|------|----------------|---|

For peer review only

| Review type | Sequence of exclusion after randomization | Reference                                                                                                                                                                                                                                                                             |
|-------------|-------------------------------------------|---------------------------------------------------------------------------------------------------------------------------------------------------------------------------------------------------------------------------------------------------------------------------------------|
| CSR         | 1                                         | Verra Wiebe C, van den Boom Lennard GH, Jacobs W, Clement Darren J, Wymenga Ate AB, Nelissen Rob GHH. Retention versus sacrifice of the posterior cruciate ligament in total knee arthroplasty for treating osteoarthritis. Cochrane Database of Systematic Reviews [Internet]. 2013. |
| CSR         | 2                                         | Anie Kofi A, Massaglia P. Psychological therapies for thalassaemia. Cochrane Database of Systematic Reviews [Internet]. 2014.                                                                                                                                                         |
| CSR         | 3                                         | Wilkinson P, Izmeth Z. Continuation and maintenance treatments for depression in older people. Cochrane Database of Systematic Reviews [Internet]. 2012.                                                                                                                              |
| CSR         | 4                                         | van Dalen Elvira C, van As Jorrit W, de Camargo B. Methotrexate for high-grade osteosarcoma in children and young adults. Cochrane Database of Systematic Reviews [Internet]. 2011.                                                                                                   |
| CSR         | 5                                         | Omar Muhammad I, Alexander Cameron E. Drug treatment for faecal incontinence in adults. Cochrane Database of Systematic Reviews [Internet]. 2013.                                                                                                                                     |
| CSR         | 6                                         | Preston Nancy J, Hurlow A, Brine J, Bennett Michael I. Blood transfusions for anaemia in patients with advanced cancer. Cochrane Database of Systematic Reviews [Internet]. 2012.                                                                                                     |
| CSR         | 7                                         | Skoetz N, Bauer K, Elter T, Monsef I, Roloff V, Hallek M, et al. Alemtuzumab for patients with chronic lymphocytic leukaemia. Cochrane Database of Systematic Reviews [Internet]. 2012.                                                                                               |
| CSR         | 8                                         | Li Luying R, Sydenham E, Chaudhary B, Beecher D, You C. Glucocorticoid with cyclophosphamide for paraquat-induced lung fibrosis. Cochrane Database of Systematic Reviews [Internet]. 2014.                                                                                            |
| CSR         | 9                                         | Ohlsson A, Lacy Janet B. Intravenous immunoglobulin for preventing infection in preterm and/or low birth weight infants. Cochrane Database of Systematic Reviews [Internet]. 2013.                                                                                                    |
| CSR         | 10                                        | Gurusamy Kurinchi S, Giljaca V, Takwoingi Y, Higgie D, Poropat G, Štimac D, et al. Endoscopic retrograde cholangiopancreatography versus intraoperative cholangiography for diagnosis of common bile duct stones. Cochrane Database of Systematic Reviews [Internet]. 2015.           |
| CSR         | 11                                        | Zhang Y, Fang C, Dong Bi R, Wu T, Deng Jue L. Oxygen therapy for pneumonia in adults. Cochrane Database of Systematic Reviews [Internet]. 2012.                                                                                                                                       |
| CSR         | 12                                        | Qureshi Mosarrat J, Kumar M. D-Penicillamine for preventing retinopathy of prematurity in preterm infants. Cochrane Database of Systematic Reviews [Internet]. 2013.                                                                                                                  |
| CSR         | 13                                        | Di Nisio M, Peinemann F, Porreca E, Rutjes Anne WS. Primary prophylaxis for venous thromboembolism in patients undergoing cardiac or thoracic surgery. Cochrane Database of Systematic Reviews [Internet]. 2015.                                                                      |
| CSR         | 14                                        | Tan Hannah B, Danilla S, Murray A, Serra R, El Dib R, Henderson Tom OW, et al. Immunonutrition as an adjuvant therapy for burns. Cochrane Database of Systematic Reviews [Internet]. 2014.                                                                                            |
| CSR         | 15                                        | Hurlow A, Bennett Michael I, Robb Karen A, Johnson Mark I, Simpson Karen H, Oxberry Stephen G. Transcutaneous electric nerve stimulation (TENS) for cancer pain in adults. Cochrane Database of Systematic Reviews [Internet]. 2012.                                                  |
| CSR         | 16                                        | Dong Z, Xu J, Wang Z, Petrov Maxim S. Stents for the prevention of pancreatic fistula following pancreaticoduodenectomy. Cochrane Database of Systematic Reviews [Internet]. 2013.                                                                                                    |
| CSR         | 17                                        | Feagan Brian G, MacDonald John K. Oral 5-aminosalicylic acid for induction of remission in ulcerative colitis. Cochrane Database of Systematic Reviews [Internet]. 2012.                                                                                                              |
| CSR         | 18                                        | Dhiwakar M, Clement WA, Supriya M, McKerrow W. Antibiotics to reduce post-tonsillectomy morbidity. Cochrane Database of Systematic Reviews [Internet]. 2012.                                                                                                                          |
| CSR         | 19                                        | Gal Robin L, Vedula Satyanarayana S, Beck R. Corticosteroids for treating optic neuritis. Cochrane Database of Systematic Reviews [Internet]. 2015.                                                                                                                                   |
| CSR         | 20                                        | Andras A, Sala Tenna A, Crawford F. Vitamin K antagonists or low-molecular-weight heparin for the long term treatment of symptomatic venous thromboembolism. Cochrane Database of Systematic Reviews [Internet]. 2012.                                                                |
| CSR         | 21                                        | Rajaram Sujanthi S, Desai Nayan K, Kalra A, Gajera M, Cavanaugh Susan K, Brampton W, et al. Pulmonary artery catheters for adult patients in intensive care. Cochrane Database of Systematic Reviews [Internet]. 2013.                                                                |
| CSR         | 22                                        | Nelson Richard L, Kelsey P, Leeman H, Meardon N, Patel H, Paul K, et al. Antibiotic treatment for Clostridium difficile-associated diarrhea in adults. Cochrane Database of Systematic Reviews [Internet]. 2011.                                                                      |
| CSR         | 23                                        | Gurion R, Belnik-Plitman Y, Gafter-Gvili A, Paul M, Vidal L, Ben-Bassat I, et al. Colony-stimulating factors for prevention and treatment of infectious complications in patients with acute myelogenous leukemia. Cochrane Database of Systematic Reviews [Internet]. 2012.          |

|     |    |                                                                                                                                                                                                                                                                              |
|-----|----|------------------------------------------------------------------------------------------------------------------------------------------------------------------------------------------------------------------------------------------------------------------------------|
| CSR | 24 | Akl Elie A, Ramly Elie P, Kahale Lara A, Yosuico Victor ED, Barba M, Sperati F, et al. Anticoagulation for people with cancer and central venous catheters. <i>Cochrane Database of Systematic Reviews</i> [Internet]. 2014.                                                 |
| CSR | 25 | Maduwage K, Buckley Nick A, de Silva HJ, Laloo David G, Isbister Geoffrey K. Snake antivenom for snake venom induced consumption coagulopathy. <i>Cochrane Database of Systematic Reviews</i> [Internet]. 2015.                                                              |
| CSR | 26 | Xiao Y, Luo M, Wang J, Luo H. Losigamone add-on therapy for partial epilepsy. <i>Cochrane Database of Systematic Reviews</i> [Internet]. 2012.                                                                                                                               |
| CSR | 27 | Lamers Mieke H, Broekman M, Drenth Joost PH, Gluud C. Aminoadamantanes versus other antiviral drugs for chronic hepatitis C. <i>Cochrane Database of Systematic Reviews</i> [Internet]. 2014.                                                                                |
| CSR | 28 | Elbers Roy G, Verhoef J, van Wegen Erwin EH, Berendse Henk W, Kwakkel G. Interventions for fatigue in Parkinson's disease. <i>Cochrane Database of Systematic Reviews</i> [Internet]. 2015.                                                                                  |
| CSR | 29 | Lodha R, Kabra Sushil K, Pandey Ravindra M. Antibiotics for community-acquired pneumonia in children. <i>Cochrane Database of Systematic Reviews</i> [Internet]. 2013.                                                                                                       |
| CSR | 30 | Thornton J, Rangaraj S. Disease modifying anti-rheumatic drugs in people with cystic fibrosis-related arthritis. <i>Cochrane Database of Systematic Reviews</i> [Internet]. 2012.                                                                                            |
| CSR | 31 | Wong V, Cheuk Daniel KL, Lee S, Chu V. Acupuncture for acute management and rehabilitation of traumatic brain injury. <i>Cochrane Database of Systematic Reviews</i> [Internet]. 2013.                                                                                       |
| CSR | 32 | Li H, Wang J, Li C, Xiao Z. Repetitive transcranial magnetic stimulation (rTMS) for panic disorder in adults. <i>Cochrane Database of Systematic Reviews</i> [Internet]. 2014.                                                                                               |
| CSR | 33 | Allersma T, Farquhar C, Cantineau Astrid EP. Natural cycle in vitro fertilisation (IVF) for subfertile couples. <i>Cochrane Database of Systematic Reviews</i> [Internet]. 2013.                                                                                             |
| CSR | 34 | Johnson N, Bryant A, Miles T, Hogberg T, Cornes P. Adjuvant chemotherapy for endometrial cancer after hysterectomy. <i>Cochrane Database of Systematic Reviews</i> [Internet]. 2011.                                                                                         |
| CSR | 35 | Choo Karen Jui L, Simons FER, Sheikh A. Glucocorticoids for the treatment of anaphylaxis. <i>Cochrane Database of Systematic Reviews</i> [Internet]. 2012.                                                                                                                   |
| CSR | 36 | Ohlsson A, Shah Vibhuti S, Stade Brenda C. Vaginal chlorhexidine during labour to prevent early-onset neonatal group B streptococcal infection. <i>Cochrane Database of Systematic Reviews</i> [Internet]. 2014.                                                             |
| CSR | 37 | Cheng Y, Lu J, Xiong X, Wu S, Lin Y, Wu T, et al. Gases for establishing pneumoperitoneum during laparoscopic abdominal surgery. <i>Cochrane Database of Systematic Reviews</i> [Internet]. 2013.                                                                            |
| CSR | 38 | Zheng J, Fang Y, Cai Bo W, Zhang H, Liu W, Wu B, et al. Intracystic bleomycin for cystic craniopharyngiomas in children. <i>Cochrane Database of Systematic Reviews</i> [Internet]. 2014.                                                                                    |
| CSR | 39 | Tonia T, Mettler A, Robert N, Schwarzer G, Seidenfeld J, Weingart O, et al. Erythropoietin or darbepoetin for patients with cancer. <i>Cochrane Database of Systematic Reviews</i> [Internet]. 2012.                                                                         |
| CSR | 40 | Bricker L, Medley N, Pratt Jeremy J. Routine ultrasound in late pregnancy (after 24 weeks' gestation). <i>Cochrane Database of Systematic Reviews</i> [Internet]. 2015.                                                                                                      |
| CSR | 41 | Lin X, Lu J, Yang M, Dong Bi R, Wu Hong M. Macrolides for diffuse panbronchiolitis. <i>Cochrane Database of Systematic Reviews</i> [Internet]. 2015.                                                                                                                         |
| CSR | 42 | Gurusamy Kurinchi S, Nagendran M, Broadhurst Jack F, Anker Stefan D, Richards T. Iron therapy in anaemic adults without chronic kidney disease. <i>Cochrane Database of Systematic Reviews</i> [Internet]. 2014.                                                             |
| CSR | 43 | El Dib R, Gameiro Orsi LF, Ogata Matheus SP, Módolo Norma SP, Braz Leandro G, Jorge Eliane C, et al. Zinc supplementation for the prevention of type 2 diabetes mellitus in adults with insulin resistance. <i>Cochrane Database of Systematic Reviews</i> [Internet]. 2015. |
| CSR | 44 | La Mantia L, Di Pietrantonj C, Rovaris M, Rigon G, Frau S, Berardo F, et al. Interferon-beta versus glatiramer acetate for relapsing-remitting multiple sclerosis. <i>Cochrane Database of Systematic Reviews</i> [Internet]. 2014.                                          |
| CSR | 45 | Zhao S, Sampson S, Xia J, Jayaram Mahesh B. Psychoeducation (brief) for people with serious mental illness. <i>Cochrane Database of Systematic Reviews</i> [Internet]. 2015.                                                                                                 |
| CSR | 46 | Gluud Lise L, Dam G, Les I, Córdoba J, Marchesini G, Borre M, et al. Branched-chain amino acids for people with hepatic encephalopathy. <i>Cochrane Database of Systematic Reviews</i> [Internet]. 2015.                                                                     |
| CSR | 47 | Mason M, Welsh Emma J, Smith I. Drug therapy for obstructive sleep apnoea in adults. <i>Cochrane Database of Systematic Reviews</i> [Internet]. 2013.                                                                                                                        |
| CSR | 48 | Tanaka Y, Nakayama T, Nishimori M, Tsujimura Y, Kawaguchi M, Sato Y. Lidocaine for preventing postoperative sore throat. <i>Cochrane Database of Systematic Reviews</i> [Internet]. 2015.                                                                                    |
| CSR | 49 | Petrucchi N, De Feo C. Lung protective ventilation strategy for the acute respiratory distress syndrome. <i>Cochrane Database of Systematic Reviews</i> [Internet]. 2013.                                                                                                    |
| CSR | 50 | Mehrholtz J, Kugler J, Pohl M. Locomotor training for walking after spinal cord injury. <i>Cochrane Database of Systematic Reviews</i> [Internet]. 2012.                                                                                                                     |
| CSR | 51 | Xander C, Meerpohl Joerg J, Galandi D, Buroh S, Schwarzer G, Antes G, et al. Pharmacological interventions for pruritus in adult palliative care patients. <i>Cochrane Database of Systematic Reviews</i> [Internet]. 2013.                                                  |
| CSR | 52 | Pammi M, Abrams Steven A. Oral lactoferrin for the treatment of sepsis and necrotizing enterocolitis in neonates. <i>Cochrane Database of Systematic Reviews</i> [Internet]. 2011.                                                                                           |

|     |    |                                                                                                                                                                                                                                                                                                                                                                           |
|-----|----|---------------------------------------------------------------------------------------------------------------------------------------------------------------------------------------------------------------------------------------------------------------------------------------------------------------------------------------------------------------------------|
| CSR | 53 | Eliakim-Raz N, Robenshtok E, Shefet D, Gafter-Gvili A, Vidal L, Paul M, et al. Empiric antibiotic coverage of atypical pathogens for community-acquired pneumonia in hospitalized adults. <i>Cochrane Database of Systematic Reviews</i> [Internet]. 2012.                                                                                                                |
| CSR | 54 | Hsu Charlie CT, Kwan Gigi NC, Thompson Shane A, Evans-Barns H, van Driel Mieke L. Embolisation for pulmonary arteriovenous malformation. <i>Cochrane Database of Systematic Reviews</i> [Internet]. 2015.                                                                                                                                                                 |
| CSR | 55 | Evans Jennifer R, Lawrenson John G. Antioxidant vitamin and mineral supplements for slowing the progression of age-related macular degeneration. <i>Cochrane Database of Systematic Reviews</i> [Internet]. 2012.                                                                                                                                                         |
| CSR | 56 | Stanton Tasha R, Wand Benedict M, Carr Daniel B, Birklein F, Wasner Gunnar L, O'Connell Neil E. Local anaesthetic sympathetic blockade for complex regional pain syndrome. <i>Cochrane Database of Systematic Reviews</i> [Internet]. 2013.                                                                                                                               |
| CSR | 57 | Afshari A, Wikkelso A, Brok J, Møller Ann M, Wetterslev J. Thrombelastography (TEG) or thromboelastometry (ROTEM) to monitor haemotherapy versus usual care in patients with massive transfusion. <i>Cochrane Database of Systematic Reviews</i> [Internet]. 2011.                                                                                                        |
| CSR | 58 | Zhou Q, Zheng J, Yu L, Jia X. Pregabalin monotherapy for epilepsy. <i>Cochrane Database of Systematic Reviews</i> [Internet]. 2012.                                                                                                                                                                                                                                       |
| CSR | 59 | Kumbargere Nagraj S, Naresh S, Srinivas K, Renjith George P, Shrestha A, Levenson D, et al. Interventions for the management of taste disturbances. <i>Cochrane Database of Systematic Reviews</i> [Internet]. 2014.                                                                                                                                                      |
| CSR | 60 | Fernandes Ricardo M, Bialy Liza M, Vandermeer B, Tjosvold L, Plint Amy C, Patel H, et al. Glucocorticoids for acute viral bronchiolitis in infants and young children. <i>Cochrane Database of Systematic Reviews</i> [Internet]. 2013.                                                                                                                                   |
| CSR | 61 | Meerpohl Joerg J, Antes G, Rücker G, Fleeman N, Motschall E, Niemeyer Charlotte M, et al. Deferasirox for managing iron overload in people with thalassaemia. <i>Cochrane Database of Systematic Reviews</i> [Internet]. 2012.                                                                                                                                            |
| CSR | 62 | Andriolo Brenda NG, Andriolo Régis B, Saconato H, Atallah Álvaro N, Valente O. Early versus late tracheostomy for critically ill patients. <i>Cochrane Database of Systematic Reviews</i> [Internet]. 2015.                                                                                                                                                               |
| CSR | 63 | Magni Laura R, Purgato M, Gastaldon C, Papola D, Furukawa Toshi A, Cipriani A, et al. Fluoxetine versus other types of pharmacotherapy for depression. <i>Cochrane Database of Systematic Reviews</i> [Internet]. 2013.                                                                                                                                                   |
| CSR | 64 | Ricci S, Dinia L, Del Sette M, Anzola P, Mazzoli T, Cenciarelli S, et al. Sonothrombolysis for acute ischaemic stroke. <i>Cochrane Database of Systematic Reviews</i> [Internet]. 2012.                                                                                                                                                                                   |
| CSR | 65 | Fisher Sheila A, Zhang H, Doree C, Mathur A, Martin-Rendon E. Stem cell treatment for acute myocardial infarction. <i>Cochrane Database of Systematic Reviews</i> [Internet]. 2015.                                                                                                                                                                                       |
| CSR | 66 | Daniels T, Mills N, Whitaker P. Nebuliser systems for drug delivery in cystic fibrosis. <i>Cochrane Database of Systematic Reviews</i> [Internet]. 2013.                                                                                                                                                                                                                  |
| CSR | 67 | Sickinger M-T, von Tresckow B, Kobe C, Engert A, Borchmann P, Skoetz N. Positron emission tomography-adapted therapy for first-line treatment in individuals with Hodgkin lymphoma. <i>Cochrane Database of Systematic Reviews</i> [Internet]. 2015.                                                                                                                      |
| CSR | 68 | Kavirajan Harish C, Lueck K, Chuang K. Alternating current cranial electrotherapy stimulation (CES) for depression. <i>Cochrane Database of Systematic Reviews</i> [Internet]. 2014.                                                                                                                                                                                      |
| CSR | 69 | Gupta Aditya K, Paquet M, Villanueva E, Brintnell W. Interventions for actinic keratoses. <i>Cochrane Database of Systematic Reviews</i> [Internet]. 2012.                                                                                                                                                                                                                |
| CSR | 70 | Khasraw M, Ameratunga Malaka S, Grant R, Wheeler H, Pavlakis N. Antiangiogenic therapy for high-grade glioma. <i>Cochrane Database of Systematic Reviews</i> [Internet]. 2014.                                                                                                                                                                                            |
| CSR | 71 | Leucht C, Huhn M, Leucht S. Amitriptyline versus placebo for major depressive disorder. <i>Cochrane Database of Systematic Reviews</i> [Internet]. 2012.                                                                                                                                                                                                                  |
| CSR | 72 | Malanda Uriëll L, Welschen Laura MC, Riphagen Ingrid I, Dekker Jacqueline M, Nijpels G, Bot Sandra DM. Self-monitoring of blood glucose in patients with type 2 diabetes mellitus who are not using insulin. <i>Cochrane Database of Systematic Reviews</i> [Internet]. 2012.                                                                                             |
| CSR | 73 | Povlsen B, Hansson T, Povlsen Sebastian D. Treatment for thoracic outlet syndrome. <i>Cochrane Database of Systematic Reviews</i> [Internet]. 2014.                                                                                                                                                                                                                       |
| CSR | 74 | Hofstede Stefanie N, Nouta Klaas A, Jacobs W, van Hooff Miranda L, Wymenga Ate B, Pijls Bart G, et al. Mobile bearing vs fixed bearing prostheses for posterior cruciate retaining total knee arthroplasty for postoperative functional status in patients with osteoarthritis and rheumatoid arthritis. <i>Cochrane Database of Systematic Reviews</i> [Internet]. 2015. |
| CSR | 75 | Visser J, Snel M, Van Vliet Huib AAM. Hormonal versus non-hormonal contraceptives in women with diabetes mellitus type 1 and 2. <i>Cochrane Database of Systematic Reviews</i> [Internet]. 2013.                                                                                                                                                                          |
| CSR | 76 | Kleinstäuber M, Witthöft M, Steffanowski A, van Marwijk H, Hiller W, Lambert Michael J. Pharmacological interventions for somatoform disorders in adults. <i>Cochrane Database of Systematic Reviews</i> [Internet]. 2014.                                                                                                                                                |
| CSR | 77 | Anderson-James S, Marchant Julie M, Acworth Jason P, Turner C, Chang Anne B. Inhaled corticosteroids for subacute cough in children. <i>Cochrane Database of Systematic Reviews</i> [Internet]. 2013.                                                                                                                                                                     |
| CSR | 78 | Tramm R, Ilic D, Davies Andrew R, Pellegrino Vincent A, Romero L, Hodgson C. Extracorporeal membrane oxygenation for critically ill adults. <i>Cochrane Database of Systematic Reviews</i> [Internet]. 2015.                                                                                                                                                              |



|     |     |                                                                                                                                                                                                                                                                                                                                  |
|-----|-----|----------------------------------------------------------------------------------------------------------------------------------------------------------------------------------------------------------------------------------------------------------------------------------------------------------------------------------|
| CSR | 79  | Scholefield B, Duncan H, Davies P, Gao Smith F, Khan K, Perkins Gavin D, et al. Hypothermia for neuroprotection in children after cardiopulmonary arrest. <i>Cochrane Database of Systematic Reviews</i> [Internet]. 2013.                                                                                                       |
| CSR | 80  | Prabhu Rama KR, Swaminathan N, Harvey Lisa A. Passive movements for the treatment and prevention of contractures. <i>Cochrane Database of Systematic Reviews</i> [Internet]. 2013.                                                                                                                                               |
| CSR | 81  | Kew Kayleigh M, Undela K, Kotorts I, Ferrara G. Macrolides for chronic asthma. <i>Cochrane Database of Systematic Reviews</i> [Internet]. 2015.                                                                                                                                                                                  |
| CSR | 82  | Segal D, MacDonald John K, Chande N. Low dose naltrexone for induction of remission in Crohn's disease. <i>Cochrane Database of Systematic Reviews</i> [Internet]. 2014.                                                                                                                                                         |
| CSR | 83  | Boonmak P, Boonmak S, Pattanittum P. High initial concentration versus low initial concentration sevoflurane for inhalational induction of anaesthesia. <i>Cochrane Database of Systematic Reviews</i> [Internet]. 2012.                                                                                                         |
| CSR | 84  | Hunt H, Stanworth S, Curry N, Woolley T, Cooper C, Ukoumunne O, et al. Thromboelastography (TEG) and rotational thromboelastometry (ROTEM) for trauma-induced coagulopathy in adult trauma patients with bleeding. <i>Cochrane Database of Systematic Reviews</i> [Internet]. 2015.                                              |
| CSR | 85  | Ells Louisa J, Mead E, Atkinson G, Corpeleijn E, Roberts K, Viner R, et al. Surgery for the treatment of obesity in children and adolescents. <i>Cochrane Database of Systematic Reviews</i> [Internet]. 2015.                                                                                                                   |
| CSR | 86  | Ali A, Hall I, Blickwedel J, Hassiotis A. Behavioural and cognitive-behavioural interventions for outwardly-directed aggressive behaviour in people with intellectual disabilities. <i>Cochrane Database of Systematic Reviews</i> [Internet]. 2015.                                                                             |
| CSR | 87  | Kiwanuka Suzanne N, Rutebemberwa E, Nalwadda C, Okui O, Ssenooba F, Kinengyere Alison A, et al. Interventions to manage dual practice among health workers. <i>Cochrane Database of Systematic Reviews</i> [Internet]. 2011.                                                                                                     |
| CSR | 88  | Vasudev A, Macritchie K, Rao Sanjay NK, Geddes J, Young Allan H. Tiagabine in the maintenance treatment of bipolar disorder. <i>Cochrane Database of Systematic Reviews</i> [Internet]. 2011.                                                                                                                                    |
| CSR | 89  | Daly C, Cody June D, Khan I, Rabindranath Kannaiyan S, Vale L, Wallace Sheila A. Double bag or Y-set versus standard transfer systems for continuous ambulatory peritoneal dialysis in end-stage kidney disease. <i>Cochrane Database of Systematic Reviews</i> [Internet]. 2014.                                                |
| CSR | 90  | Saldanha Ian J, Akinyede O, Robinson Karen A. Immunosuppressive drug therapy for preventing rejection following lung transplantation in cystic fibrosis. <i>Cochrane Database of Systematic Reviews</i> [Internet]. 2013.                                                                                                        |
| CSR | 91  | Bradt J, Dileo C, Shim M. Music interventions for preoperative anxiety. <i>Cochrane Database of Systematic Reviews</i> [Internet]. 2013.                                                                                                                                                                                         |
| CSR | 92  | Jacobs W, Van der Gaag Niels A, Tuschel A, de Kleuver M, Peul W, Verbout AJ, et al. Total disc replacement for chronic back pain in the presence of disc degeneration. <i>Cochrane Database of Systematic Reviews</i> [Internet]. 2012.                                                                                          |
| CSR | 93  | Wakai A, O'Sullivan R, McCabe A. Intra-articular lignocaine versus intravenous analgesia with or without sedation for manual reduction of acute anterior shoulder dislocation in adults. <i>Cochrane Database of Systematic Reviews</i> [Internet]. 2011.                                                                        |
| CSR | 94  | Chang Zhi H, Liu Zhao Y. Subintimal angioplasty for chronic lower limb arterial occlusion. <i>Cochrane Database of Systematic Reviews</i> [Internet]. 2013.                                                                                                                                                                      |
| CSR | 95  | Moja L, Lucenteforte E, Kwag Koren H, Bertele V, Campomori A, Chakravarthy U, et al. Systemic safety of bevacizumab versus ranibizumab for neovascular age-related macular degeneration. <i>Cochrane Database of Systematic Reviews</i> [Internet]. 2014.                                                                        |
| CSR | 96  | Robertson L, Roche A. Primary prophylaxis for venous thromboembolism in people undergoing major amputation of the lower extremity. <i>Cochrane Database of Systematic Reviews</i> [Internet]. 2013.                                                                                                                              |
| CSR | 97  | Magula N, Dediccoat M. Low dose versus high dose stavudine for treating people with HIV infection. <i>Cochrane Database of Systematic Reviews</i> [Internet]. 2015.                                                                                                                                                              |
| CSR | 98  | Ghamami N, Chiang Sandy Hsiang Y, Dormuth C, Wright James M. Time course for blood pressure lowering of dihydropyridine calcium channel blockers. <i>Cochrane Database of Systematic Reviews</i> [Internet]. 2014.                                                                                                               |
| SR  | 99  | Sculean A, Nikolidakis D, Nikou G, Ivanovic A, Chapple ILC, Stavropoulos A. Biomaterials for promoting periodontal regeneration in human intrabony defects: a systematic review. <i>Periodontology</i> 2000. 2015;68(1):182-216.                                                                                                 |
| SR  | 100 | Bright R, Hynes K, Gronthos S, Bartold PM. Periodontal ligament-derived cells for periodontal regeneration in animal models: a systematic review. <i>Journal Of Periodontal Research</i> . 2015;50(2):160-72.                                                                                                                    |
| SR  | 101 | Hernandez AV, Usmani A, Rajamanickam A, Moheet A. Thiazolidinediones and risk of heart failure in patients with or at high risk of type 2 diabetes mellitus: A meta-analysis and meta-regression analysis of placebo-controlled randomized clinical trials. <i>American Journal of Cardiovascular Drugs</i> . 2011;11(2):115-28. |
| SR  | 102 | Valery PC, Moore SP, Meiklejohn J, Bray F. International variations in childhood cancer in indigenous populations: A systematic review. <i>The Lancet Oncology</i> . 2014;15(2):e90-103.                                                                                                                                         |
| SR  | 103 | Kim SH, Stoicea N, Soghomonyan S, Bergese SD. Remifentanyl-Acute opioid tolerance and opioid-induced hyperalgesia: A systematic review. <i>American Journal of Therapeutics</i> . 2015;22(3):e62-e74.                                                                                                                            |

|    |     |                                                                                                                                                                                                                                                                                                                                                                                 |
|----|-----|---------------------------------------------------------------------------------------------------------------------------------------------------------------------------------------------------------------------------------------------------------------------------------------------------------------------------------------------------------------------------------|
| SR | 104 | Xiao X, Li L, Feng Y, Jiang YS, He QW, Tan XG, et al. Sevoflurane in the anesthesia of child short period surgery: A systematic review. <i>Chinese Journal of Evidence-Based Medicine</i> . 2011;11(10):1184-91.                                                                                                                                                                |
| SR | 105 | Ranjan A, Penninga E, Jelsig AM, Hasselbalch HC, Bjerrum OW. Inheritance of the chronic myeloproliferative neoplasms. A systematic review. <i>Clinical Genetics</i> . 2013;83(2):99-107.                                                                                                                                                                                        |
| SR | 106 | Usenbo A, Kramer V, Young T, Musekiwa A. Prevalence of arthritis in Africa: A systematic review and meta-analysis. <i>PLoS ONE</i> . 2015;10(8).                                                                                                                                                                                                                                |
| SR | 107 | Siebert W. Adhesions after previous cesarean section. Meta-analysis and systematic review. <i>Gynakologische Praxis</i> . 2012;36(2):336.                                                                                                                                                                                                                                       |
| SR | 108 | Drake MT, Murad MH, Mauck KF, Lane MA, Undavalli C, Elraiyah T, et al. Risk factors for low bone mass-related fractures in men: A systematic review and meta-analysis. <i>Journal of Clinical Endocrinology and Metabolism</i> . 2012;97(6):1861-70.                                                                                                                            |
| SR | 109 | Butler EN, Chawla N, Lund J, Harlan LC, Warren JL, Yabroff KR. Patterns of colorectal cancer care in the United States and Canada: A systematic review. <i>Journal of the National Cancer Institute</i> . 2013. p. 13-35.                                                                                                                                                       |
| SR | 110 | Montin L, Koivisto JM. Effectiveness of self-directed learning methods compared with other learning methods in nursing education related to nursing students' or registered nurses' learning outcomes: A systematic review protocol. <i>Journal of Systematic Reviews and Implementation Reports</i> . 2014;12(2):1-8.                                                          |
| SR | 111 | Jindal A, Bal A, Agarwal R. Inflammatory myofibroblastic tumor of the trachea in the pediatric age group: Case report and systematic review of the literature. <i>Journal of Bronchology and Interventional Pulmonology</i> . 2015;22(1):58-65.                                                                                                                                 |
| SR | 112 | Baldwin C, Brusco NK. The effect of vocational rehabilitation on return-to-work rates post stroke: A systematic review. <i>Topics in Stroke Rehabilitation</i> . 2011;18(5):562-72.                                                                                                                                                                                             |
| SR | 113 | Sundar S, Wu J, Hillaby K, Yap J, Lilford R. A systematic review evaluating the relationship between progression free survival and post progression survival in advanced ovarian cancer. <i>Gynecologic Oncology</i> . 2012;125(2):493-9.                                                                                                                                       |
| SR | 114 | Detjen AK, DiNardo AR, Leyden J, Steingart KR, Menzies D, Schiller I, et al. Xpert MTB/RIF for the diagnosis of tuberculosis in children-a systematic review and meta-analysis. <i>American Journal of Tropical Medicine and Hygiene</i> . 2013;89(5):418-9.                                                                                                                    |
| SR | 115 | Bellemain-Appaix A, O'Connor SA, Silvain J, Cucherat M, Beygui F, Barthélémy O, et al. Association of clopidogrel pretreatment with mortality, cardiovascular events, and major bleeding among patients undergoing percutaneous coronary intervention: A systematic review and meta-analysis. <i>JAMA - Journal of the American Medical Association</i> . 2012;308(23):2507-17. |
| SR | 116 | Liese J, Ulrich F, Schreckenbach T, Wahle M, Zeuzem S, Bechstein WO, et al. A rare cause of acute liver failure: Adult onset still's disease-case report and systematic review of the literature. <i>Transplant International</i> . 2011;24:237.                                                                                                                                |
| SR | 117 | Davie A, Damera V, Bianic F, Ricci J, Bernhardt P, Gokhale S, et al. CNI-related renal impairment in liver transplantation: A comparison of cyclosporine and tacrolimus-based regimens. <i>American Journal of Transplantation</i> . 2013;13:533.                                                                                                                               |
| SR | 118 | Loar J. Diagnostic accuracy and radiation dose of CT coronary angiography in atrial fibrillation: Systematic review and meta-analysis: Vorre MM, Abdulla J. <i>Radiology</i> 2013;267:376-86. <i>Journal of Emergency Medicine</i> . 2013;45(2):308.                                                                                                                            |
| SR | 119 | Sharma V, Deo SV, Altarabsheh SE, Cho YH, Erwin PJ, Park SJ. Comparison of the early haemodynamics of stented pericardial and porcine aortic valves. <i>European Journal of Cardio-thoracic Surgery</i> . 2014;47(1):4-10.                                                                                                                                                      |
| SR | 120 | Van Tuyl LH, Lems WF, Boers M. Measurement of stiffness in patients with rheumatoid arthritis in low disease activity or remission: A systematic review. <i>BMC Musculoskeletal Disorders</i> . 2014;15(1).                                                                                                                                                                     |
| SR | 121 | Shumay D, Del Gaudio F, Melisko M, Dunn L. Factors related to fear of recurrence in breast cancer survivors. <i>Psycho-Oncology</i> . 2013;22:134.                                                                                                                                                                                                                              |
| SR | 122 | Rawlinson A, Kitchingham N, Hart C, McMahon G, Ong SL, Khanna A. Mechanisms of reducing postoperative pain, nausea and vomiting: A systematic review of current techniques. <i>Evidence-Based Medicine</i> . 2012;17(3):75-80.                                                                                                                                                  |
| SR | 123 | Chen L, Xiao-Qing Z, Qin L, Hong W. Influencing factors related to sun protection in children and adolescents: A systematic review. <i>Chinese Journal of Evidence-Based Medicine</i> . 2014;14(12):1429-33.                                                                                                                                                                    |
| SR | 124 | Qin SY, Jiang HX, Ning HJ, Nie HM, Tao L, Hu BL, et al. Effect of Helicobacter pylori eradication on blood ammonia levels in cirrhotic patients: A systematic review. <i>Hepato-Gastroenterology</i> . 2012;59(120):2576-81.                                                                                                                                                    |
| SR | 125 | Müller SA, Vavken P, Pagenstert G. Simulated activity but real trauma: A systematic review on nintendo wii injuries based on a case report of an acute anterior cruciate ligament rupture. <i>Medicine (United States)</i> . 2015;94(12):e648.                                                                                                                                  |
| SR | 126 | Kim S-H, Lilot M, Sidhu KS, Rinehart J, Yu Z, Canales C, et al. Accuracy and precision of continuous noninvasive arterial pressure monitoring compared with invasive arterial pressure: a systematic review and meta-analysis. <i>Anesthesiology</i> . 2014;120(5):1080-97.                                                                                                     |
| SR | 127 | Nickerson JW, Chackungal S, Knowlton L, McQueen K, Burkle FM. Surgical care during humanitarian crises: a systematic review of published surgical caseload data from foreign medical teams. <i>Prehospital And Disaster Medicine</i> . 2012;27(2):184-9.                                                                                                                        |
| SR | 128 | Zulman DM, Sussman JB, Chen X, Cigolle CT, Blaum CS, Hayward RA. Examining the evidence: A systematic review of the inclusion and analysis of older adults in randomized controlled trials. <i>Journal of General Internal Medicine</i> . 2011;26(7):783-90.                                                                                                                    |
| SR | 129 | Singh S, Venkatesh SK, Wang Z, Miller FH, Motosugi U, Low RN, et al. Diagnostic performance of magnetic resonance elastography in staging liver fibrosis: A systematic                                                                                                                                                                                                          |

|    |     |                                                                                                                                                                                                                                                                                                                              |
|----|-----|------------------------------------------------------------------------------------------------------------------------------------------------------------------------------------------------------------------------------------------------------------------------------------------------------------------------------|
|    |     | review and meta-analysis of individual participant data. <i>Clinical Gastroenterology and Hepatology</i> . 2015;13(3):440-51.                                                                                                                                                                                                |
| SR | 130 | Hergan D, Thut D, Sherman O, Day MS. Meniscal allograft transplantation. <i>Arthroscopy - Journal of Arthroscopic and Related Surgery</i> . 2011;27(1):101-12.                                                                                                                                                               |
| SR | 131 | Gong Z, Zhao D. Cardiovascular diseases and risk factors among Chinese immigrants. <i>Internal And Emergency Medicine</i> . 2015.                                                                                                                                                                                            |
| SR | 132 | Jordan SJ, Nagle CM, Coory MD, Maresco D, Protani MM, Pandeya NA, et al. Has the association between hysterectomy and ovarian cancer changed over time? A systematic review and meta-analysis. <i>European Journal of Cancer</i> . 2013;49(17):3638-47.                                                                      |
| SR | 133 | Lalidou F, Kolios G, Tavridou A, Drosos GI. Bone grafts as carriers for local antibiotic delivery for the treatment and prevention of bone infections. <i>Surgical Technology International</i> . 2014;25:239-45.                                                                                                            |
| SR | 134 | Cheng S, Grasso L, Martinez-Orozco JA, Al-Agha R, Pivonello R, Colao A, et al. Pregnancy in acromegaly: Experience from two referral centers and systematic review of the literature. <i>Clinical Endocrinology</i> . 2012;76(2):264-71.                                                                                     |
| SR | 135 | Wu F, Weng S, Li C, Sun J, Li L, Gao Q. Submandibular gland transfer for the prevention of postradiation xerostomia in patients with head and neck cancer: A systematic review and meta-analysis. <i>ORL</i> . 2015;77(2):70-86.                                                                                             |
| SR | 136 | Torné R, Rodríguez-Hernández A, Bernard T, Arian Abelló F, Vilalta Castan J, Sahuquillo J. Subarachnoid hemorrhage in systemic lupus erythematosus: Systematic review and report of three cases. <i>Clinical Neurology and Neurosurgery</i> . 2015;128:17-24.                                                                |
| SR | 137 | Jokiniemi K, Pietilä A-M, Kylmä J, Haatainen K. Advanced nursing roles: a systematic review. <i>Nursing &amp; Health Sciences</i> . 2012;14(3):421-31.                                                                                                                                                                       |
| SR | 138 | Gerstner D, Walser S, Brenner B, Büniger J, Eikmann T, Raulf-Heimsoth M, et al. Health relevance of exposure to bioaerosols. <i>Allergologie</i> . 2014;37(5):190-7.                                                                                                                                                         |
| SR | 139 | Kurth E, Kennedy HP, Spichiger E, Hösli I, Zemp Stutz E. Crying babies, tired mothers: What do we know? A systematic review. <i>Midwifery</i> . 2011;27(2):187-94.                                                                                                                                                           |
| SR | 140 | Cook DA, Brydges R, Zendejas B, Hamstra SJ, Hatala R. Technology-enhanced simulation to assess health professionals: A systematic review of validity evidence, research methods, and reporting quality. <i>Academic Medicine</i> . 2013;88(6):872-83.                                                                        |
| SR | 141 | Xia L, Wang X, Xu T, Zhang X, Zhu Z, Qin L, et al. Robotic versus open radical cystectomy: An updated systematic review and meta-analysis. <i>PLoS ONE</i> . 2015;10(3).                                                                                                                                                     |
| SR | 142 | Taylor RS, Desai MJ, Rigoard P, Taylor RJ. Predictors of pain relief following spinal cord stimulation in chronic back and leg pain and failed back surgery syndrome: A systematic review and meta-regression analysis. <i>Pain Practice</i> . 2014;14(6):489-505.                                                           |
| SR | 143 | Manouchehri N, Birch DW, Shi X, Hadi G, Karmali S. Heated versus cold insufflation for minimally invasive abdominal surgery has minimal benefit on patient outcomes. <i>Surgical Endoscopy and Other Interventional Techniques</i> . 2011;25:S346.                                                                           |
| SR | 144 | Chiappini E, Accetta G, Bonsignori F, Boddp V, Galli L, Biggeri A, et al. Interferon-γ release assays for the diagnosis of mycobacterium tuberculosis infection in children: A systematic review and meta-analysis. <i>International Journal of Immunopathology and Pharmacology</i> . 2012;25(3):557-64.                    |
| SR | 145 | Carson SJ. Limited evidence for existing caries assessment systems. <i>Evidence-Based Dentistry</i> . 2013;14(1):10-1.                                                                                                                                                                                                       |
| SR | 146 | Siriwardhana C, Ali SS, Roberts B, Stewart R. A systematic review of resilience and mental health outcomes of conflict-driven adult forced migrants. <i>Conflict And Health</i> . 2014;8:13.                                                                                                                                 |
| SR | 147 | Chamberlain C, McNamara B, Williams ED, Yore D, Oldenburg B, Oats J, et al. Diabetes in pregnancy among indigenous women in australia, canada, new zealand and the united states: A systematic review of the evidence for screening in early pregnancy. <i>Diabetes/Metabolism Research and Reviews</i> . 2013;29(4):241-56. |
| SR | 148 | Leadley RM, Armstrong N, Lee YC, Allen A, Kleijnen J. Chronic diseases in the European Union: The prevalence and health cost implications of chronic pain. <i>Journal of Pain and Palliative Care Pharmacotherapy</i> . 2012;26(4):310-25.                                                                                   |
| SR | 149 | Xiangjun K. To ensure all ward 22a patients on atypical antipsychotics are monitored according to protocol. <i>Annals of the Academy of Medicine Singapore</i> . 2012;41(9):S181.                                                                                                                                            |
| SR | 150 | Weatherley ND, Jackson PR. The new Sheffield risk and benefit tables for the elderly. <i>QJM</i> . 2011;104(1):3-12.                                                                                                                                                                                                         |
| SR | 151 | Srigley JA, Lightfoot D, Fernie G, Gardam M, Muller MP. Hand hygiene monitoring technology: protocol for a systematic review. <i>Systematic reviews</i> . 2013;2:101.                                                                                                                                                        |
| SR | 152 | Morgan JL, Thomas K, Braungart S, Nelson RL. Transparent cap colonoscopy versus standard colonoscopy: A systematic review and meta-analysis. <i>Techniques in Coloproctology</i> . 2013;17(4):353-60.                                                                                                                        |
| SR | 153 | Hahn A, Jochai D, Caufield-Noll C, Rios R, Allen L, Cordts G. Self inflicted burns: A systematic review of the literature. <i>Journal of Burn Care and Research</i> . 2012;33(2):S181.                                                                                                                                       |
| SR | 154 | <i>Canadian Respiratory Journal</i> . 2013;20(2).                                                                                                                                                                                                                                                                            |
| SR | 155 | Dawe SR, Windsor JA, Broeders JA, Cregan PC, Hewett PJ, Maddern GJ. A systematic review of surgical skills transfer after simulation-based training: Laparoscopic cholecystectomy and endoscopy. <i>Annals of Surgery</i> . 2014;259(2):236-48.                                                                              |
| SR | 156 | Xiong C, Liu G, Ma R, Xue J, Wu A. Efficacy of palonosetron for preventing postoperative nausea and vomiting: a systematic review and meta-analysis. <i>Canadian Journal of Anesthesia</i> . 2015.                                                                                                                           |
| SR | 157 | O'Horo JC, Silva GLM, Silvia Munoz-Price L, Safdar N. The efficacy of daily bathing with chlorhexidine for reducing healthcare-associated bloodstream infections: A meta-analysis. <i>Infection Control and Hospital Epidemiology</i> . 2012;33(3):257-67.                                                                   |

|    |     |                                                                                                                                                                                                                                                                              |
|----|-----|------------------------------------------------------------------------------------------------------------------------------------------------------------------------------------------------------------------------------------------------------------------------------|
| SR | 158 | Rehm J, Kailasapillai S, Larsen E, Rehm MX, Samokhvalov AV, Shield KD, et al. A systematic review of the epidemiology of unrecorded alcohol consumption and the chemical composition of unrecorded alcohol. <i>Addiction (Abingdon, England)</i> . 2014;109(6):880-93.       |
| SR | 159 | Schadewaldt V, McInnes E, Hiller JE, Gardner A. Views and experiences of nurse practitioners and medical practitioners with collaborative practice in primary health care - an integrative review. <i>BMC Family Practice</i> . 2013;14:132-.                                |
| SR | 160 | Hao Z, Yang C, Liu M, Wu B. Renal dysfunction and thrombolytic therapy in patients with acute ischemic stroke: A systematic review and meta-analysis. <i>Medicine (United States)</i> . 2014;93(28):e286.                                                                    |
| SR | 161 | Kishi T, Matsunaga S, Iwata N. Suvorexant for primary insomnia: A systematic review and meta-analysis of randomized placebo-controlled trials. <i>PLoS ONE</i> . 2015;10(8).                                                                                                 |
| SR | 162 | Jones CJ, Smith HE, Llewellyn CD. A systematic review of the effectiveness of interventions using the Common Sense Self-Regulatory Model to improve adherence behaviours. <i>Journal Of Health Psychology</i> . 2015.                                                        |
| SR | 163 | White A. Outpatient interventions for hepatology patients with fluid retention: a review and synthesis of the literature. <i>Gastroenterology Nursing: The Official Journal Of The Society Of Gastroenterology Nurses And Associates</i> . 2014;37(3):236-44.                |
| SR | 164 | Williams M, Lewis L, McKeough Z, Holland A, Lee A, McNamara R, et al. Association between exercise session attendance and improvements in exercise outcomes in people with COPD. <i>Respirology</i> . 2013;18:56.                                                            |
| SR | 165 | Heck E, Jaworska N, DeSomma E, Dhoopar AS, MacMaster FP, Dewey D, et al. A survey of mental health services at post-secondary institutions in Alberta. <i>Canadian Journal of Psychiatry</i> . 2014;59(5):250-8.                                                             |
| SR | 166 | Renzaho AMN, Romios P, Crock C, Sønderlund AL. The effectiveness of cultural competence programs in ethnic minority patient-centered health care-a systematic review of the literature. <i>International Journal for Quality in Health Care</i> . 2013;25(3):261-9.          |
| SR | 167 | Soong JL, Lim WH. Vasopressin and terlipressin in the treatment of vasodilatory septic shock: A systematic review. <i>Proceedings of Singapore Healthcare</i> . 2011;20(3):208-18.                                                                                           |
| SR | 168 | Sexton CE, Betts JF, Demnitz N, Dawes H, Ebmeier KP, Johansen-Berg H. A systematic review of MRI studies examining the relationship between physical fitness and activity and the white matter of the ageing brain. <i>Neuroimage</i> . 2015.                                |
| SR | 169 | Foroozan M, Beauchet A, Funck-Brentano E, Sei JF, Saiag P. Current evidence on recurrence rate of basal cell and squamous cell carcinomas treated by Mohs micrographic surgery: Systematic review. <i>Journal of the American Academy of Dermatology</i> . 2014;70(5):AB195. |
| SR | 170 | Zhang Q, Li J, Liu F, Li Z. Comments on Li H et al. "A systematic review of matrix metalloproteinase 9 as a biomarker of survival in patients with osteosarcoma". <i>Tumor Biology</i> . 2014;36(1):5-6.                                                                     |
| SR | 171 | Coghill D, Banaschewski T, Zuddas A, Pelaz A, Gagliano A, Doepfner M. Long-acting methylphenidate formulations in the treatment of attention-deficit/hyperactivity disorder: A systematic review of head-to-head studies. <i>BMC Psychiatry</i> . 2013;13.                   |
| SR | 172 | Sacchetti M, Mantelli F, Lambiasi A, Mastropasqua A, Merlo D, Bonini S. Systematic review of randomised clinical trials on topical ciclosporin a for the treatment of dry eye disease. <i>British Journal of Ophthalmology</i> . 2014;98(8):1016-22.                         |
| SR | 173 | Cramer JA, Sapin C, François C. Indirect comparison of clobazam and other therapies for Lennox-Gastaut syndrome. <i>Acta Neurologica Scandinavica</i> . 2013;128(2):91-9.                                                                                                    |
| SR | 174 | Rueda-Ochoa OL, Munoz-Suarez D, Calvo-Betancourt L, Lopez E, Vargas C, Delgado M, et al. Heart rate variability as a prognostic marker of mortality in patients with myocardial infarction systematic review and meta-analysis. <i>Europace</i> . 2012;14:iv31.              |
| SR | 175 | Hatfield G, Hammond C, Hunt MA. Clinical tests of balance in the knee osteoarthritis population: A systematic review. <i>Osteoarthritis and Cartilage</i> . 2015;23:A374.                                                                                                    |
| SR | 176 | Christopher N, Mehta N, Sinert R. Systematic review: Lung ultrasound for the diagnosis of pneumonia in the emergency department. <i>Academic Emergency Medicine</i> . 2014;21(5):S36.                                                                                        |
| SR | 177 | Nettis E, Delle Donne P, Di Leo E, Calogiuri GF, Ferrannini A, Vacca A. Rupatadine for the treatment of urticaria. <i>Expert Opinion on Pharmacotherapy</i> . 2013;14(13):1807-13.                                                                                           |
| SR | 178 | Zeiler FA, Zeiler KJ, Teitelbaum J, Gillman LM, West M. VNS for refractory status epilepticus. <i>Epilepsy Research</i> . 2015;112:100-13.                                                                                                                                   |
| SR | 179 | Sofaer N, Strech D. The need for systematic reviews of reasons. <i>Bioethics</i> . 2012;26(6):315-28.                                                                                                                                                                        |
| SR | 180 | Leclère C, Viaux S, Avril M, Achard C, Chetouani M, Missonnier S, et al. Why synchrony matters during mother-child interactions: A systematic review. <i>PLoS ONE</i> . 2014;9(12).                                                                                          |
| SR | 181 | Patel V, Patel P, Dawson J. Comment on: Non-infectious pulmonary toxicity of rituximab: A systematic review. <i>Rheumatology (United Kingdom)</i> . 2012;51(11):2111-2.                                                                                                      |
| SR | 182 | O'Sullivan KE, Hurley ET, Segurado R, Sugrue D, Hurley JP. Transaortic TAVI is a valid alternative to transapical approach. <i>Journal of Cardiac Surgery</i> . 2015;30(5):381-90.                                                                                           |
| SR | 183 | Tseng S-H, Chen H-C, Tam K-W. Systematic review and meta-analysis of the effect of equine assisted activities and therapies on gross motor outcome in children with cerebral palsy. <i>Disability And Rehabilitation</i> . 2013;35(2):89-99.                                 |
| SR | 184 | Jayakrishnan TT, Groeschl RT, George B, Thomas JP, Pappas S, Gamblin TC, et al. Management of acute cholecystitis in cancer patients: A comparative effectiveness approach. <i>Surgical Endoscopy and Other Interventional Techniques</i> . 2014;28(5):1505-14.              |
| SR | 185 | Alves GS, Oertel Knöchel V, Knöchel C, Carvalho AF, Pantel J, Engelhardt E, et al. Integrating retrogenesis theory to alzheimer's disease pathology: Insight from DTI-TBSS                                                                                                   |



|    |     |                                                                                                                                                                                                                                                                                                                                                                                                                                                                       |
|----|-----|-----------------------------------------------------------------------------------------------------------------------------------------------------------------------------------------------------------------------------------------------------------------------------------------------------------------------------------------------------------------------------------------------------------------------------------------------------------------------|
|    |     | investigation of the white matter microstructural integrity. <i>BioMed Research International</i> . 2015;2015.                                                                                                                                                                                                                                                                                                                                                        |
| SR | 186 | Huster KM, Müller A, Prohn MJ, Nowak D, Herbig B. Medical risks in older pilots: a systematic review on incapacitation and age. <i>International archives of occupational and environmental health</i> . 2014;87(6):567-78.                                                                                                                                                                                                                                           |
| SR | 187 | Alcaraz A, González-Zuelgaray J, Augustovski F. Cost-effectiveness of cardioverter defibrillators in patients with risk factors for sudden death in Argentina. <i>Value in Health</i> . 2011;14(5 SUPPL.):S33-S8.                                                                                                                                                                                                                                                     |
| SR | 188 | Lopez A, Billioud V, Peyrin-Biroulet C, Peyrin-Biroulet L. Adherence to anti-TNF therapy in inflammatory bowel diseases: A systematic review. <i>Inflammatory Bowel Diseases</i> . 2013;19(7):1528-33.                                                                                                                                                                                                                                                                |
| SR | 189 | Khan M, Wendel C, Thai H, Movahed M. Failed percutaneous recanalization of chronic total occlusion is associated with higher in-hospital mortality: A systematic review and meta-analysis of the literature. <i>Catheterization and Cardiovascular Interventions</i> . 2013;81:S33-S4.                                                                                                                                                                                |
| SR | 190 | Neville CE, McKinley MC, Holmes VA, Spence D, Woodside JV. The relationship between breastfeeding and postpartum weight change-a systematic review and critical evaluation. <i>International Journal of Obesity</i> . 2014;38(4):577-90.                                                                                                                                                                                                                              |
| SR | 191 | Hawley G, Janamian T, Jackson C, Wilkinson SA. In a maternity shared-care environment, what do we know about the paper hand-held and electronic health record: A systematic literature review. <i>BMC Pregnancy and Childbirth</i> . 2014;14(1).                                                                                                                                                                                                                      |
| SR | 192 | Raja FA, Counsell N, Colombo N, Pfisterer J, du Bois A, Parmar MK, et al. Platinum versus platinum-combination chemotherapy in platinum-sensitive recurrent ovarian cancer: A meta-analysis using individual patient data. <i>Annals of Oncology</i> . 2013;24(12):3028-34.                                                                                                                                                                                           |
| SR | 193 | Lipka S, Rabbanifard R, Kumar A, Brady P. Single versus double balloon enteroscopy for small bowel diagnostics: A systematic review and meta-analysis. <i>Journal of Clinical Gastroenterology</i> . 2015;49(3):177-84.                                                                                                                                                                                                                                               |
| SR | 194 | Wilhelm B, Rajić A, Greig JD, Waddell L, Harris J. The effect of Hazard analysis critical control point programs on microbial contamination of carcasses in abattoirs: A systematic review of published data. <i>Foodborne Pathogens and Disease</i> . 2011;8(9):949-60.                                                                                                                                                                                              |
| SR | 195 | Hurst KV, Lee R, Milosevic I, Handa A. Re: 'Efficacy and Safety of the New Oral Anticoagulants Dabigatran, Rivaroxaban, Apixaban, and Edoxaban in the Treatment and Secondary Prevention of Venous Thromboembolism: A Systematic Review and Meta-analysis of Phase III Trials'- Key Learning Points for Surgeons. <i>European Journal Of Vascular And Endovascular Surgery: The Official Journal Of The European Society For Vascular Surgery</i> . 2015;50(1):126-7. |
| SR | 196 | Antony AK, Hootnick JL, Antony AK. Ulnar forearm free flaps in head and neck reconstruction: systematic review of the literature and a case report. <i>Microsurgery</i> . 2014;34(1):68-75.                                                                                                                                                                                                                                                                           |
| SR | 197 | Pantelic M, Shenderovich Y, Cluver L, Boyes M. Predictors of internalised HIV-related stigma: a systematic review of studies in sub-Saharan Africa. <i>Health Psychology Review</i> . 2015:1-22.                                                                                                                                                                                                                                                                      |
| SR | 198 | Zhang Z, Xu J, Yao Y, Chu S, Cheng H, Chen D, et al. Giant cell tumors of the skull: A series of 18 cases and review of the literature. <i>Journal of Neuro-Oncology</i> . 2013;115(3):437-44.                                                                                                                                                                                                                                                                        |
| SR | 199 | Freedman OC, Fletcher GG, Gandhi S, Mates M, Dent SF, Trudeau ME, et al. Adjuvant endocrine therapy for early breast cancer: A systematic review of the evidence for the 2014 cancer care Ontario systemic therapy guideline. <i>Current Oncology</i> . 2015;22:S95-S113.                                                                                                                                                                                             |
| SR | 200 | Carr HJ, McDermott A, Tadbiri H, Uebbing AM, Londrigan M. The effectiveness of computer-based learning in hospitalized adults with heart failure on knowledge, re-admission, self-care, quality of life and patient satisfaction: A systematic review. <i>JBI Database of Systematic Reviews and Implementation Reports</i> . 2014;12(5):430-65.                                                                                                                      |
| SR | 201 | Frank M, Mittendorf T. Influence of pharmacogenomic profiling prior to pharmaceutical treatment in metastatic colorectal cancer on cost effectiveness: A systematic review. <i>PharmacoEconomics</i> . 2013;31(3):215-28.                                                                                                                                                                                                                                             |
| SR | 202 | Do Nascimento FV, Piccoli V, Beer MA, Von Frankenberg AD, Crispim D, Gerchman F. Association of HSD11B1 polymorphic variants and adipose tissue gene expression with metabolic syndrome, obesity and type 2 diabetes mellitus: A systematic review. <i>Diabetology and Metabolic Syndrome</i> . 2015;7(1).                                                                                                                                                            |
| SR | 203 | McKay AJ, Mahesh PA, Fordham JZ, Majeed A. Prevalence of COPD in India: A systematic review. <i>Primary Care Respiratory Journal</i> . 2012;21(3):313-21.                                                                                                                                                                                                                                                                                                             |
| SR | 204 | Córdoba-Soriano JG, Puri R, Amat-Santos I, Ribeiro HB, Abdul-Jawad Altisent O, del Trigo M, et al. Valve thrombosis following transcatheter aortic valve implantation: a systematic review. <i>Revista Española De Cardiología (English Ed)</i> . 2015;68(3):198-204.                                                                                                                                                                                                 |
| SR | 205 | Tan A, Tan DT, Tan X-W, Mehta JS. Osteo-odonto keratoprosthesis: systematic review of surgical outcomes and complication rates. <i>The Ocular Surface</i> . 2012;10(1):15-25.                                                                                                                                                                                                                                                                                         |
| SR | 206 | Sommerville EW, Chinnery PF, Gorman GS, Taylor RW. Genotypic and phenotypic heterogeneity in adult-onset progressive external ophthalmoplegia (PEO) with mitochondrial DNA instability: A systematic review. <i>Neuromuscular Disorders</i> . 2014;24:S15.                                                                                                                                                                                                            |
| SR | 207 | Lippi G, Mattiuzzi C, Franchini M. Sleep apnea and venous thromboembolism. A systematic review. <i>Thrombosis And Haemostasis</i> . 2015;114(4).                                                                                                                                                                                                                                                                                                                      |

|    |     |                                                                                                                                                                                                                                                                                                                                                                |
|----|-----|----------------------------------------------------------------------------------------------------------------------------------------------------------------------------------------------------------------------------------------------------------------------------------------------------------------------------------------------------------------|
| SR | 208 | Van Loo HM, de Jonge P, Romeijn J-W, Kessler RC, Schoevers RA. Data-driven subtypes of major depressive disorder: a systematic review. <i>BMC Medicine</i> . 2012;10:156-.                                                                                                                                                                                     |
| SR | 209 | Kriza C, Emmert M, Wahlster P, Niederländer C, Kolominsky-Rabas P. A comparison of the main cost-effectiveness drivers of virtual colonography versus conventional colonoscopy for colorectal cancer screening: An international review. <i>Annals of Oncology</i> . 2013;24:iv120.                                                                            |
| SR | 210 | De Ruijter RAG, Stegenga B, Schaub RMH, Reneman MF, Middel B. Determinants of physical and mental health complaints in dentists: a systematic review. <i>Community Dentistry And Oral Epidemiology</i> . 2015;43(1):86-96.                                                                                                                                     |
| SR | 211 | Leitmeyer K. European risk assessment guidance for infectious diseases transmitted on aircraft—the RAGIDA project. <i>Euro Surveillance: Bulletin Européen Sur Les Maladies Transmissibles = European Communicable Disease Bulletin</i> . 2011;16(16).                                                                                                         |
| SR | 212 | Fitzharris M, Yu J, Hammond N, Taylor C, Wu Y, Finfer S, et al. Injury in China: A systematic review of injury surveillance studies conducted in Chinese hospital emergency departments. <i>BMC Emergency Medicine</i> . 2011;11.                                                                                                                              |
| SR | 213 | Linhares AC, Stupka JA, Ciapponi A, Bardach AE, Glujovsky D, Aruj PK, et al. Burden and typing of rotavirus group A in Latin America and the Caribbean: Systematic review and meta-analysis. <i>Reviews in Medical Virology</i> . 2011;21(2):89-109.                                                                                                           |
| SR | 214 | Billeci L, Sicca F, Maharatna K, Apicella F, Narzisi A, Campatelli G, et al. On the application of Quantitative EEG for characterizing autistic brain: A systematic review. <i>Frontiers in Human Neuroscience</i> . 2013(JUL).                                                                                                                                |
| SR | 215 | Sendt KV, Tracy DK, Bhattacharyya S. A systematic review of factors influencing adherence to antipsychotic medication in schizophrenia-spectrum disorders. <i>Psychiatry Research</i> . 2015;225(1-2):14-30.                                                                                                                                                   |
| SR | 216 | Johnson RF, Gustin J. Acute renal failure requiring renal replacement therapy in the intensive care unit: Impact on prognostic assessment for shared decision making. <i>Journal of Palliative Medicine</i> . 2011;14(7):883-9.                                                                                                                                |
| SR | 217 | Wang H, Chen T, Wang H, Song Y, Li X, Wang J. A systematic review of the physiological and operative severity score for the enUmeration of mortality and morbidity and its Portsmouth modification as predictors of post-operative morbidity and mortality in patients undergoing pancreatic surgery. <i>American Journal of Surgery</i> . 2013;205(4):466-72. |
| SR | 218 | Bose H. Role of occupational therapy in dysphagia management for children with special needs. <i>Archives of Physical Medicine and Rehabilitation</i> . 2013;94(10):e60.                                                                                                                                                                                       |
| SR | 219 | Cervero RM, Gaines JK. The impact of CME on physician performance and patient health outcomes: an updated synthesis of systematic reviews. <i>The Journal Of Continuing Education In The Health Professions</i> . 2015;35(2):131-8.                                                                                                                            |
| SR | 220 | Marta GN, Riera R, Macedo CR, De Castro Jr G, Carvalho AL, Kowalski LP. Induction chemotherapy prior to surgery with or without postoperative radiotherapy for oral cavity cancer patients: Systematic review and meta-analysis. <i>Head and Neck</i> . 2015;37:E187.                                                                                          |
| SR | 221 | Peña L, Moreno CB, Gutierrez-Alvarez AM. Pain management in Guillain-Barre syndrome: A systematic review. <i>Neurologia (Barcelona, Spain)</i> . 2014.                                                                                                                                                                                                         |
| SR | 222 | Patil AS, Martin J, Tsukahara K, Skljarevski A, Miller K, Towns R, et al. Pseudomonoamniotic Pregnancy: Case Report and Review of Etiologic Considerations. <i>Fetal and Pediatric Pathology</i> . 2015.                                                                                                                                                       |
| SR | 223 | Visser BJ, Wieten RW, Kroon D, Nagel IM, Bélard S, van Vugt M, et al. Efficacy and safety of artemisinin combination therapy (ACT) for non-falciparum malaria: a systematic review. <i>Malaria Journal</i> . 2014;13:463-.                                                                                                                                     |
| SR | 224 | Booksmythe I, Mautz B, Davis J, Nakagawa S, Jennions MD. Facultative adjustment of the offspring sex ratio and male attractiveness: a systematic review and meta-analysis. <i>Biological Reviews Of The Cambridge Philosophical Society</i> . 2015.                                                                                                            |
| SR | 225 | Liu YF, Dong H, Chen Z, Wang Y, Tu SH. Impact of ankylosing spondylitis on sexual function: A systematic review and meta analysis. <i>Experimental and Therapeutic Medicine</i> . 2015;9(4):1501-7.                                                                                                                                                            |
| SR | 226 | Rathbone J, Kaltenthaler E, Richards A, Tappenden P, Bessey A, Cantrell A. A systematic review of eculizumab for atypical haemolytic uraemic syndrome (aHUS). <i>BMJ Open</i> . 2013;3(11).                                                                                                                                                                    |
| SR | 227 | Konno R, Kang HS, Makimoto K. The best evidence for minimizing resistance-to-care during assisted personal care for older adults with dementia in nursing homes: A systematic review. <i>JBHI Database of Systematic Reviews and Implementation Reports</i> . 2012;10(58):4622-32.                                                                             |
| SR | 228 | Lee MR, Unger JG, Rohrich RJ. Management of the nasal dorsum in rhinoplasty: a systematic review of the literature regarding technique, outcomes, and complications. <i>Plastic and reconstructive surgery</i> . 2011;128(5):538e-50e.                                                                                                                         |
| SR | 229 | Broeders JAJL, Roks DJGH, Ahmed Ali U, Draaisma WA, Smout AJPM, Hazebroek EJ. Laparoscopic anterior versus posterior fundoplication for gastroesophageal reflux disease: Systematic review and meta-analysis of randomised trials. <i>Surgical Endoscopy and Other Interventional Techniques</i> . 2012;26:S2.                                                 |
| SR | 230 | Jia Y, Chen C, Ng CS, Leung SW. Meta-analysis of randomized controlled trials on the efficacy of Di'ao Xinxuekang capsule and isosorbide dinitrate in treating angina pectoris. <i>Evidence-based Complementary and Alternative Medicine</i> . 2012;2012.                                                                                                      |
| SR | 231 | Chiappini E, Accetta G, Bonsignori F, Boddp V, Galli L, Biggeri A, et al. Interferon-γ release assays for the diagnosis of mycobacterium tuberculosis infection in children: A systematic review and meta-analysis. <i>International Journal of Immunopathology and Pharmacology</i> . 2012;25(3):557-64.                                                      |

|    |     |                                                                                                                                                                                                                                                                                                         |
|----|-----|---------------------------------------------------------------------------------------------------------------------------------------------------------------------------------------------------------------------------------------------------------------------------------------------------------|
| SR | 232 | Elnahas A, Graybiel K, Farrokhhyar F, Gmora S, Anvari M, Hong D. Revisional surgery after failed laparoscopic adjustable gastric banding: A systematic review. <i>Surgical Endoscopy and Other Interventional Techniques</i> . 2013;27(3):740-5.                                                        |
| SR | 233 | Noyes AM, Thompson PD. A systematic review of the time course of atherosclerotic plaque regression. <i>Atherosclerosis</i> . 2014;234(1):75-84.                                                                                                                                                         |
| SR | 234 | Al-Moraissi EA, El-Sharkawy TM, El-Ghareeb TI, Chrcanovic BR. Three-dimensional versus standard miniplate fixation in the management of mandibular angle fractures: A systematic review and meta-analysis. <i>International Journal of Oral and Maxillofacial Surgery</i> . 2014;43(6):708-16.          |
| SR | 235 | Domínguez VB, Ramos N, García D, Bustamante M, Torrents A, Varea S, et al. Clinical trials during pregnancy: What has been done. A systematic review. <i>Basic and Clinical Pharmacology and Toxicology</i> . 2011;109:71.                                                                              |
| SR | 236 | Punukollu M, Mushet N, Linney M, Hennessy C, Morton M. Neuropsychiatric manifestations of Sydenham's chorea: A systematic review. <i>Developmental Medicine and Child Neurology</i> . 2015.                                                                                                             |
| SR | 237 | Dourdin N, Wagner M, Melnyk P, Rindress D. Systematic review to assess the quality of published health economic evaluations. <i>Journal of Population Therapeutics and Clinical Pharmacology</i> . 2011;18(2):e210.                                                                                     |
| SR | 238 | Hills C, Boshoff K, Jewell K. Preferred teaching and learning approaches of students considered 'Generation Y' in health professions pre registration education: A comprehensive systematic review protocol. <i>JB I Database of Systematic Reviews and Implementation Reports</i> . 2013;11(5):140-56. |
| SR | 239 | Klonoff EA. Introduction to the special section on discrimination. <i>Health Psychology: Official Journal Of The Division Of Health Psychology, American Psychological Association</i> . 2014;33(1):1-2.                                                                                                |
| SR | 240 | Al Shemeili S, Klein S, Strath A, Stewart D. Identifying inappropriate anticholinergic prescribing in the elderly: A systematic review. <i>International Journal of Clinical Pharmacy</i> . 2013;35(6):1343.                                                                                            |
| SR | 241 | Oliveira MAd, Ribeiro H, Castillo-Salgado C. Geospatial analysis applied to epidemiological studies of dengue: a systematic review. <i>Revista Brasileira De Epidemiologia = Brazilian Journal Of Epidemiology</i> . 2013;16(4):907-17.                                                                 |
| SR | 242 | Miller AC, Elamin EM, Suffredini AF. Inhaled anticoagulation regimens for the treatment of smoke inhalation-associated acute lung injury: A systematic review. <i>Critical Care Medicine</i> . 2014;42(2):413-9.                                                                                        |
| SR | 243 | Belvederi Murri M, Pariante CM, Dazzan P, Hepgul N, Papadopoulos AS, Zunszain P, et al. Hypothalamic-pituitary-adrenal axis and clinical symptoms in first-episode psychosis. <i>Psychoneuroendocrinology</i> . 2012;37(5):629-44.                                                                      |
| SR | 244 | Zeni MB. Systematic review of health literacy in Cochrane database studies on paediatric asthma educational interventions: Searching beyond rigorous design. <i>International Journal of Evidence-Based Healthcare</i> . 2012;10(1):3-8.                                                                |
| SR | 245 | Fleuren MAH, Paulussen TGWM, Van Dommelen P, Van Buuren S. Towards a measurement instrument for determinants of innovations. <i>International Journal For Quality In Health Care: Journal Of The International Society For Quality In Health Care / Isqua</i> . 2014;26(5):501-10.                      |
| SR | 246 | Yampolsky C, Hem S, Bendersky D. Dorsal column stimulator applications. <i>Surgical Neurology International</i> . 2012;3(SUPPL4):S275-S89.                                                                                                                                                              |
| SR | 247 | Polisena J, Chen S, Cimon K, McGill S, Forward K, Gardam M. Clinical effectiveness of rapid tests for methicillin resistant <i>Staphylococcus aureus</i> (MRSA) in hospitalized patients: A systematic review. <i>BMC Infectious Diseases</i> . 2011:336.                                               |
| SR | 248 | Hu Z, Yin X, Liao J, Zhou C, Yang Z, Zou S. The effect of teeth extraction for orthodontic treatment on the upper airway: a systematic review. <i>Sleep and Breathing</i> . 2015.                                                                                                                       |
| SR | 249 | Cleyen I, Vazeille E, Artieda M, Verspaget HW, Szczypiorska M, Bringer M-A, et al. Genetic and microbial factors modulating the ubiquitin proteasome system in inflammatory bowel disease. <i>Gut</i> . 2014;63(8):1265-74.                                                                             |
| SR | 250 | Gupta A, Chazen JL, Hartman M, Delgado D, Anumula N, Shao H, et al. Cerebrovascular reserve and stroke risk in patients with carotid stenosis or occlusion: A systematic review and meta-analysis. <i>Stroke</i> . 2012;43(11):2884-91.                                                                 |
| SR | 251 | Armstrong R, White S, Streak J, Tivey D. The effect of nasal introduction of anaesthetic in adults undergoing fiberoptic endoscopic evaluation of swallowing (FEES): A systematic review protocol. <i>JB I Database of Systematic Reviews and Implementation Reports</i> . 2013;11(6):259-74.           |
| SR | 252 | Gao Q, Tsoi KKF, Hirai HW, Wong MCS, Chan FKL, Wu JCY, et al. Serrated polyps and the risk of synchronous colorectal advanced neoplasia: A systematic review and meta-analysis. <i>American Journal of Gastroenterology</i> . 2015;110(4):501-9.                                                        |
| SR | 253 | Sproat R, Radford P, Hunt A. Hemostatic glues in tonsillectomy: A systematic review. <i>Laryngoscope</i> . 2015.                                                                                                                                                                                        |
| SR | 254 | Bourke L, Rosario DJ, Steed L, Taylor SJC. Response to comment on 'Interventions to improve exercise behaviour in sedentary people living with and beyond cancer: A systematic review'. <i>British Journal of Cancer</i> . 2014;111(12):2378-9.                                                         |
| SR | 255 | Rodrigo GJ, Plaza V. Efficacy and safety of a fixed-dose combination of indacaterol and glycopyrronium for the treatment of COPD: A systematic review. <i>Chest</i> . 2014;146(2):309-17.                                                                                                               |
| SR | 256 | Mooney J, Ranasinghe I, Chow C, Barzi F, Zoungas S, Tan T, et al. Pre-operative kidney function as a predictor of adverse outcomes after surgery- A systematic review and meta-analysis. <i>Heart Lung and Circulation</i> . 2011;20:S212.                                                              |



|    |     |                                                                                                                                                                                                                                                                                                                 |
|----|-----|-----------------------------------------------------------------------------------------------------------------------------------------------------------------------------------------------------------------------------------------------------------------------------------------------------------------|
| SR | 257 | Ben Hadj Yahia M-B, Jouin-Bortolotti A, Dervaux B. Extending the Human Papillomavirus Vaccination Programme to Include Males in High-Income Countries: A Systematic Review of the Cost-Effectiveness Studies. <i>Clinical Drug Investigation</i> . 2015;35(8):471-85.                                           |
| SR | 258 | Singh AD, Turell ME, Topham AK. Uveal melanoma: Trends in incidence, treatment, and survival. <i>Ophthalmology</i> . 2011;118(9):1881-5.                                                                                                                                                                        |
| SR | 259 | Gornall BF, Myles PS, Smith CL, Burke JA, Leslie K, Pereira MJ, et al. Measurement of quality of recovery using the QoR-40: A quantitative systematic review. <i>British Journal of Anaesthesia</i> . 2013;111(2):161-9.                                                                                        |
| SR | 260 | Luijten M, Machielsen MWJ, Veltman DJ, Hester R, de Haan L, Franken IHA. Systematic review of ERP and fMRI studies investigating inhibitory control and error processing in people with substance dependence and behavioural addictions. <i>Journal of Psychiatry and Neuroscience</i> . 2014;39(3):149-69.     |
| SR | 261 | Wu CC, Bai CH, Huang MT, Wu CH, Tam KW. Local anesthetic infusion pump for pain management following open inguinal hernia repair: A meta-analysis. <i>International Journal of Surgery</i> . 2014;12(3):245-50.                                                                                                 |
| SR | 262 | Tsukamoto K, Machida K. Effects of psychological stress on neutrophil phagocytosis and bactericidal activity in humans a meta-analysis. <i>International Journal of Psychophysiology</i> . 2014;91(2):67-72.                                                                                                    |
| SR | 263 | Clark K, Currow DC. Assessing constipation in palliative care within a gastroenterology framework. <i>Palliative Medicine</i> . 2012;26(6):834-41.                                                                                                                                                              |
| SR | 264 | Boers M. Using literature to solve clinical problems. <i>Annals of the Rheumatic Diseases</i> . 2013;72.                                                                                                                                                                                                        |
| SR | 265 | De-Almeida CP, Wenzel A, de-Carvalho CS, Powell VB, Araújo-Neto C, Quarantini LC, et al. Amygdalar volume in borderline personality disorder with and without comorbid post-traumatic stress disorder: A meta-analysis. <i>CNS Spectrums</i> . 2012;17(2):70-5.                                                 |
| SR | 266 | Boerner KE, Birnie KA, Chambers CT, Taddio A, McMurtry CM, Noel M, et al. Simple Psychological Interventions for Reducing Pain From Common Needle Procedures in Adults: Systematic Review of Randomized and Quasi-Randomized Controlled Trials. <i>The Clinical Journal Of Pain</i> . 2015;31(10 Suppl):S90-S8. |
| SR | 267 | Jeon KC, Chen LS, Goodson P. Decision to abort after a prenatal diagnosis of sex chromosome abnormality: A systematic review of the literature. <i>Genetics in Medicine</i> . 2011.                                                                                                                             |
| SR | 268 | Muth A, Ragnarsson O, Johannsson G, Wängberg B. Systematic review of surgery and outcomes in patients with primary aldosteronism. <i>The British journal of surgery</i> . 2015;102(4):307-17.                                                                                                                   |
| SR | 269 | Pan X-F, Griffiths UK, Pennington M, Yu H, Jit M. Systematic review of economic evaluations of vaccination programs in mainland China: Are they sufficient to inform decision making? <i>Vaccine</i> . 2015.                                                                                                    |
| SR | 270 | Zeng X, Dong P, Xie X. Disease burden of rheumatoid arthritis in mainland China: A systematic review and meta-analysis. <i>Value in Health</i> . 2012;15(7):A672.                                                                                                                                               |
| SR | 271 | Sharma V, Deo SV, Altarabsheh SE, Cho YH, Erwin PJ, Park SJ. Comparison of the early haemodynamics of stented pericardial and porcine aortic valves. <i>European Journal Of Cardio-Thoracic Surgery: Official Journal Of The European Association For Cardio-Thoracic Surgery</i> . 2015;47(1):4-10.            |
| SR | 272 | Liu Y, Lv DL, Duan JJ, Xu SL, Zhang JF, Yang XJ, et al. ALDH1A1 expression correlates with clinicopathologic features and poor prognosis of breast cancer patients: A systematic review and meta-analysis. <i>BMC Cancer</i> . 2014;14(1).                                                                      |
| SR | 273 | Capolongo S, Buffoli M, Oppio A, Petronio MG. [Sustainability and hygiene of building: future perspectives]. <i>Epidemiologia E Prevenzione</i> . 2014;38(6 Suppl 2):46-50.                                                                                                                                     |
| SR | 274 | Ahsan SF, Wang Y. In response to "systematic review and meta-analysis of Meniett therapy for Meniere's disease". <i>Laryngoscope</i> . 2015.                                                                                                                                                                    |
| SR | 275 | Moraes LC, Só MVR, Dal Pizzol TdS, Ferreira MBC, Montagner F. Distribution of genes related to antimicrobial resistance in different oral environments: a systematic review. <i>Journal Of Endodontics</i> . 2015;41(4):434-41.                                                                                 |
| SR | 276 | McMahon JM, Volpe EM, Klostermann K, Trabold N, Xue Y. A systematic review of the psychometric properties of the Sexual Relationship Power Scale in HIV/AIDS research. <i>Archives Of Sexual Behavior</i> . 2015;44(2):267-94.                                                                                  |
| SR | 277 | Bennabi D, Aouizerate B, El-Hage W, Doumy O, Moliere F, Courtet P, et al. Risk factors for treatment resistance in unipolar depression: a systematic review. <i>Journal Of Affective Disorders</i> . 2015;171:137-41.                                                                                           |
| SR | 278 | Joshi A, Trout K. The role of health information kiosks in diverse settings: a systematic review. <i>Health Information And Libraries Journal</i> . 2014;31(4):254-73.                                                                                                                                          |
| SR | 279 | i JY, Zhang YF, Smith GS, Xue CJ, Luo YN, Chen WH, et al. Quality of reporting of randomized clinical trials in tai chi interventions-A systematic review. <i>Evidence-based Complementary and Alternative Medicine</i> . 2011;2011.                                                                            |
| SR | 280 | Wood TJ, Quinn KM, Farrokhyar F, Deheshi B, Corbett T, Ghert MA. Local control of extra-abdominal desmoid tumors: Systematic review and meta-analysis. <i>Rare Tumors</i> . 2013;5(1):5-10.                                                                                                                     |
| SR | 281 | Mounesan L, Sepidarkish M, Hosseini H, Ahmadi A, Ardalan G, Kelishadi R, et al. Policy brief on promoting physical activity among adolescents. <i>International Journal of Preventive Medicine</i> . 2012;3(9):599-606.                                                                                         |
| SR | 282 | Dulon M, Peters C, Schablon A, Nienhaus A. MRSA carriage among healthcare workers in non-outbreak settings in Europe and the United States: A systematic review. <i>BMC Infectious Diseases</i> . 2014;14(1).                                                                                                   |

|    |     |                                                                                                                                                                                                                                                                                                                                                                   |
|----|-----|-------------------------------------------------------------------------------------------------------------------------------------------------------------------------------------------------------------------------------------------------------------------------------------------------------------------------------------------------------------------|
| SR | 283 | Xie ZB, Ma L, Wang XB, Bai T, Ye JZ, Zhong JH, et al. Transarterial embolization with or without chemotherapy for advanced hepatocellular carcinoma: a systematic review. <i>Tumor Biology</i> . 2014;35(9):8451-9.                                                                                                                                               |
| SR | 284 | Zhou H-X, Lu L, Chu T, Wang T, Cao D, Li F, et al. Skeletal cryptococcosis from 1977 to 2013. <i>Frontiers In Microbiology</i> . 2015;5:740-.                                                                                                                                                                                                                     |
| SR | 285 | Creemers H, Grupstra H, Nollet F, van den Berg LH, Beelen A. Prognostic factors for the course of functional status of patients with ALS: a systematic review. <i>Journal of Neurology</i> . 2015;262(6):1407-23.                                                                                                                                                 |
| SR | 286 | Malchow B, Hasan A, Fusar-Poli P, Schmitt A, Falkai P, Wobrock T. Cannabis abuse and brain morphology in schizophrenia: A review of the available evidence. <i>European Archives of Psychiatry and Clinical Neuroscience</i> . 2013;263(1):3-13.                                                                                                                  |
| SR | 287 | Rahimtoola SH, Huang G. Treatment of obstructive thrombosed prosthetic heart valve. <i>Cardiology (Switzerland)</i> . 2015;131:98.                                                                                                                                                                                                                                |
| SR | 288 | Wolz I, Fagundo AB, Treasure J, Fernández-Aranda F. The processing of food stimuli in abnormal eating: A systematic review of electrophysiology. <i>European Eating Disorders Review</i> . 2015;23(4):251-61.                                                                                                                                                     |
| SR | 289 | Schinasi L, Leon ME. Non-hodgkin lymphoma and occupational exposure to agricultural pesticide chemical groups and active ingredients: A systematic review and meta-analysis. <i>International Journal of Environmental Research and Public Health</i> . 2014;11(4):4449-527.                                                                                      |
| SR | 290 | Baker L, Beres AL, Baird R. A systematic review and meta-analysis of gastrostomy insertion techniques in children. <i>Journal of Pediatric Surgery</i> . 2015;50(5):718-25.                                                                                                                                                                                       |
| SR | 291 | Abdallah FW, Halpern SH, Aoyama K, Brull R. Will the real benefits of single-shot interscalene block please stand up? A systematic review and meta-analysis. <i>Anesthesia and Analgesia</i> . 2015;120(5):1114-29.                                                                                                                                               |
| SR | 292 | Bryden A, Roberts B, Petticrew M, McKee M. A systematic review of the influence of community level social factors on alcohol use. <i>Health and Place</i> . 2013;21:70-85.                                                                                                                                                                                        |
| SR | 293 | Zwiers R, Wiegerinck JI, Murawski CD, Smyth NA, Kennedy JG, Van Dijk CN. Surgical treatment for posterior ankle impingement. <i>Arthroscopy - Journal of Arthroscopic and Related Surgery</i> . 2013;29(7):1263-70.                                                                                                                                               |
| SR | 294 | Van Der Meer FJ, Velthorst E, Meijer CJ, Machielsen MW, Fusar-Poli P, De Haan L. Cannabis use in patients at clinical high risk of psychosis: Impact on prodromal symptoms and transition to psychosis-a systematic review. <i>Schizophrenia Research</i> . 2012;136:S347.                                                                                        |
| SR | 295 | Zhang R, Xu Y, Yang S, Liang H, Zhang Y, Liu Y. OnabotulinumtoxinA for neurogenic detrusor overactivity and dose differences: a systematic review. <i>International braz j urol : official journal of the Brazilian Society of Urology</i> . 2015;41(2):207-19.                                                                                                   |
| RR | 296 | Kiezebrink K, Coyle J, Hoddinott P, Witham M, Clarke A, Avenell A. Ways to intervene and support engagement of older adults weight loss study (wise owls) c mixed methods project developing an intervention. <i>Annals of Nutrition and Metabolism</i> . 2013;63:721-2.                                                                                          |
| RR | 297 | Chaiyachati KH, Ogbuoji O, Price M, Suthar AB, Negussie EK, Bärnighausen T. Interventions to improve adherence to antiretroviral therapy: a rapid systematic review. <i>AIDS (London, England)</i> . 2014;28 Suppl 2:S187-S204.                                                                                                                                   |
| RR | 298 | Franek J. Challenges of developing rapid guidance for complex interventions. <i>BMJ Quality and Safety</i> . 2013;22:A33.                                                                                                                                                                                                                                         |
| RR | 299 | Dennis SM, Harris M, Lloyd J, Powell Davies G, Faruqi N, Zwar N. Do people with existing chronic conditions benefit from telephone coaching? A rapid review. <i>Australian Health Review: A Publication Of The Australian Hospital Association</i> . 2013;37(3):381-8.                                                                                            |
| RR | 300 | Hildon Z, Neuburger J, Allwood D, van der Meulen J, Black N. Clinicians' and patients' views of metrics of change derived from patient reported outcome measures (PROMs) for comparing providers' performance of surgery. <i>BMC health services research</i> . 2012;12:171.                                                                                      |
| RR | 301 | Elliott IA, Beech AR. A U.K. Cost-Benefit Analysis of Circles of Support and Accountability Interventions. <i>Sexual Abuse: Journal of Research and Treatment</i> . 2013;25(3):211-29.                                                                                                                                                                            |
| RR | 302 | Jarrett N, Scott I, Addington-Hall J, Amir Z, Brearley S, Hodges L, et al. Informing future research priorities into the psychological and social problems faced by cancer survivors: a rapid review and synthesis of the literature. <i>European Journal Of Oncology Nursing: The Official Journal Of European Oncology Nursing Society</i> . 2013;17(5):510-20. |
| RR | 303 | Varker T, Forbes D, Dell L, Weston A, Merlin T, Hodson S, et al. Rapid evidence assessment: increasing the transparency of an emerging methodology. <i>Journal Of Evaluation In Clinical Practice</i> . 2015.                                                                                                                                                     |
| RR | 304 | Khangura S, Konnyu K, Cushman R, Grimshaw J, Moher D. Evidence summaries: The evolution of a rapid review approach. <i>Systematic Reviews</i> . 2012;1(1).                                                                                                                                                                                                        |
| RR | 305 | Jain S, Boyd C, Fiorentino L, Khorsan R, Crawford C. Are there efficacious treatments for treating the fatigue-sleep disturbance-depression symptom cluster in breast cancer patients? A Rapid Evidence Assessment of the Literature (REAL®). <i>Breast Cancer: Targets and Therapy</i> . 2015;7:267-91.                                                          |
| RR | 306 | Feys F, Devroey D. Dapoxetine for premature ejaculation: A rapid evidence assessment. <i>Journal of Sexual Medicine</i> . 2015;12:24.                                                                                                                                                                                                                             |
| RR | 307 | Sutton A, Grant MJ. Cost-effective ways of delivering enquiry services: a rapid review. <i>Health Information And Libraries Journal</i> . 2011;28(4):249-55.                                                                                                                                                                                                      |
| RR | 308 | Jain S, Fiorentino L, Lee C, Crawford C, Khorsan R, Jonas W. A rapid evidence assessment (real®) of the literature: Are there efficacious treatments for treating the                                                                                                                                                                                             |

|    |     |                                                                                                                                                                                                                                                                                                                                                       |
|----|-----|-------------------------------------------------------------------------------------------------------------------------------------------------------------------------------------------------------------------------------------------------------------------------------------------------------------------------------------------------------|
|    |     | fatigue-sleep disturbance-depression symptom cluster in breast cancer patients? <i>Psycho-Oncology</i> . 2013;22:75-6.                                                                                                                                                                                                                                |
| RR | 309 | Manayi A, Saeidnia S. A concern on phthalate pollution of herbal extracts/medicines and detection methods. <i>Research Journal of Pharmacognosy</i> . 2014;2(3):49-54.                                                                                                                                                                                |
| RR | 310 | Boycott N, Schneider J, McMurran M. Additional interventions to enhance the effectiveness of individual placement and support: a rapid evidence assessment. <i>Rehabilitation Research And Practice</i> . 2012;2012:382420-.                                                                                                                          |
| RR | 311 | Tavares SBN, Alves de Sousa NL, Manrique EJC, Pinheiro de Albuquerque ZB, Zeferino LC, Amaral RG. Improvement in the routine screening of cervical smears: A study using rapid prescreening and 100% rapid review as internal quality control methods. <i>Cancer Cytopathology</i> . 2011;119(6):367-76.                                              |
| RR | 312 | Khorsan R, Crawford C, Ives JA, Walter AR, Jonas WB. The effect of omega-3 fatty acids on biomarkers of inflammation: a rapid evidence assessment of the literature. <i>Military Medicine</i> . 2014;179(11 Suppl):2-60.                                                                                                                              |
| RR | 313 | Thomas B, Potter J, Sacks G, Webster J. Evaluation of national food reformulation initiatives: A proposed evaluation tool. <i>Global Heart</i> . 2014;9(1):e309.                                                                                                                                                                                      |
| RR | 314 | Lee C, Crawford C, Wallerstedt D, York A, Duncan A, Smith J, et al. The effectiveness of acupuncture research across components of the trauma spectrum response (tsr): A systematic review of reviews. <i>Systematic Reviews</i> . 2012;1(1).                                                                                                         |
| RR | 315 | McDaid D, Park A. Investing in integrative medicine for mental health and wellbeing: Making the economic case. <i>BMC Complementary and Alternative Medicine</i> . 2012;12.                                                                                                                                                                           |
| RR | 316 | Kim S, Wang B, Lee J, Kim B, La H, Park YM, et al. Statistical analysis system of spontaneous adverse drug reaction reports. <i>Journal of Korean Society for Clinical Pharmacology and Therapeutics</i> . 2012;20(2):155-64.                                                                                                                         |
| RR | 317 | Shin JJ, Rosenfeld RM, Schwartz SR, Mitchell RB, Weinberger DG. Rapid review: The guidelines in pediatric otolaryngology. <i>Otolaryngology - Head and Neck Surgery (United States)</i> . 2012;147:P30.                                                                                                                                               |
| RR | 318 | van den Broek EMJM, van der Zaag-Loonen HJ, Bruinjes TD. Systematic Review: Efficacy of Gufoni Maneuver for Treatment of Lateral Canal Benign Paroxysmal Positional Vertigo with Geotropic Nystagmus. <i>Otolaryngology--Head And Neck Surgery: Official Journal Of American Academy Of Otolaryngology-Head And Neck Surgery</i> . 2014;150(6):933-8. |
| RR | 319 | Reynolds P. Gap analysis of animal hemorrhagic shock models through rapid evidence assessment strategies. <i>Shock</i> . 2015;43(6):42.                                                                                                                                                                                                               |
| RR | 320 | Macaulay R. What the english could learn from the Irish: Making the nice approval process more cost-effective. <i>Value in Health</i> . 2014;17(7):A440.                                                                                                                                                                                              |
| RR | 321 | Sadler M, Murphy M. Do standardized referral forms improve the quality of general practitioner referral letters to pigmented lesion clinics? A pilot study. <i>British Journal of Dermatology</i> . 2012;167(6):e29.                                                                                                                                  |
| RR | 322 | Lui M, Jones CA, Westby MD. Effect of non-surgical, non-pharmacological weight loss interventions in patients who are obese prior to hip and knee arthroplasty surgery: a rapid review. <i>Systematic Reviews</i> . 2015;4:121-.                                                                                                                      |
| RR | 323 | Wiffen PJ, Derry S, Moore RA. Impact of morphine, fentanyl, oxycodone or codeine on patient consciousness, appetite and thirst when used to treat cancer pain. <i>The Cochrane Database Of Systematic Reviews</i> . 2014;5:CD011056.                                                                                                                  |
| RR | 324 | Moran R, Davidson P. An uneven spread: a review of public involvement in the National Institute of Health Research's Health Technology Assessment program. <i>International Journal Of Technology Assessment In Health Care</i> . 2011;27(4):343-7.                                                                                                   |
| RR | 325 | Ryu S, James J, Gerszten P, Yin F, Timmerman R, Hitchcock Y, et al. RTOG 0631 Phase II/III study of image-guided stereotactic radiosurgery for localized spine metastases: Phase II results. <i>International Journal of Radiation Oncology Biology Physics</i> . 2011;81(2):S131-S2.                                                                 |
| RR | 326 | Marks L, Weatherly H, Mason A. Prioritizing investment in public health and health equity: what can commissioners do? <i>Public Health</i> . 2013;127(5):410-8.                                                                                                                                                                                       |
| RR | 327 | Koster M, Garrity C, Gallagher C, Schunemann H, Norris S. The role of rapid systematic reviews for development of rapid guidance in health care and health policy settings. <i>BMJ Quality and Safety</i> . 2013;22:A6.                                                                                                                               |
| RR | 328 | Halladay CW, Trikalinos TA, Schmid IT, Schmid CH, Dahabreh IJ. Using data sources beyond PubMed has a modest impact on the results of systematic reviews of therapeutic interventions. <i>Journal of Clinical Epidemiology</i> . 2015;68(9):1076-84.                                                                                                  |
| RR | 329 | Klee EW, Winter E, Ferber MJ. Bioinformatics decision support for interpretation of clinical NGS variants. <i>Journal of Molecular Diagnostics</i> . 2013;15(6):940-1.                                                                                                                                                                                |
| RR | 330 | Kirkland SW, Bullard M, Couperthwaite S, Rowe BH. Establishing a standardized process of gathering evidence-based information to support clinical knowledge development. <i>Canadian Journal of Emergency Medicine</i> . 2014;16:S95.                                                                                                                 |
| RR | 331 | Ryu S, Pugh SL, Gerszten PC, Yin F-F, Timmerman RD, Hitchcock YJ, et al. RTOG 0631 phase 2/3 study of image guided stereotactic radiosurgery for localized (1-3) spine metastases: phase 2 results. <i>Practical Radiation Oncology</i> . 2014;4(2):76-81.                                                                                            |
| RR | 332 | Yang ZX, Shen JT, Li YP, Zhao K, Shi CH, Xiao Y, et al. Helical tomotherapy for cancer treatment: a rapid health technology assessment. <i>Journal Of Evidence-Based Medicine</i> . 2014;7(3):192-218.                                                                                                                                                |
| RR | 333 | de Bruin RJM, Hage R, van der Zaag-Loonen H, van Benthem PPG. Rapid review: sinonasal surgery vs. medical therapy for asthma in patients with chronic rhinosinusitis with or without nasal polyps. <i>European Archives Of Oto-Rhino-Laryngology: Official Journal Of The European Federation Of Oto-Rhino-Laryngological Societies (EUFOS)</i> :     |

|    |     |                                                                                                                                                                                                                                                                                                                                           |
|----|-----|-------------------------------------------------------------------------------------------------------------------------------------------------------------------------------------------------------------------------------------------------------------------------------------------------------------------------------------------|
|    |     | Affiliated With The German Society For Oto-Rhino-Laryngology - Head And Neck Surgery. 2015.                                                                                                                                                                                                                                               |
| RR | 334 | Neville-Webbe HL, Carser JE, Wong H, Andrews J, Poulter T, Smith R, et al. The impact of a new acute oncology service in acute hospitals: Experience from the Clatterbridge Cancer Centre and Merseyside and Cheshire Cancer Network. <i>Clinical Medicine, Journal of the Royal College of Physicians of London.</i> 2013;13(6):565-659. |
| RR | 335 | Lombardi G, Zustovich F, Farina P, Polo V, Farina M, Puppa AD, et al. Cilengitide in bevacizumab-refractory high-grade glioma: two case reports and critical review of the literature. <i>Anti-Cancer Drugs.</i> 2012;23(7):749-53.                                                                                                       |
| RR | 336 | Petrosino A, Campie P, Pace J, Fronius T, Guckenbunrg S, Wiatrowski M, et al. Cross-sector, multi-agency interventions to address urban youth firearms violence: A Rapid Evidence Assessment. <i>Aggression and Violent Behavior.</i> 2015;22:87-96.                                                                                      |
| RR | 337 | Freitas MG, Souza KM, Silva MT, Elias FTS. Bariatric surgery from the perspective of brazilian national health system (sus). <i>Value in Health.</i> 2012;15(7):A402-A3.                                                                                                                                                                  |
| RR | 338 | Coleman P, Turner J. Patient priorities and decision-making about using 999 EMS? A review of the literature. <i>Emergency Medicine Journal.</i> 2011;28(11):e2.                                                                                                                                                                           |
| RR | 339 | Davidson G, Kelly B, Macdonald G, Rizzo M, Lombard L, Abogunrin O, et al. Supported decision making: a review of the international literature. <i>International Journal Of Law And Psychiatry.</i> 2015;38:61-7.                                                                                                                          |
| RR | 340 | Hartling L, Guise J-M, Kato E, Anderson J, Aronson N, Belinson S, et al. EPC Methods: An Exploration of Methods and Context for the Production of Rapid Reviews. 2015.                                                                                                                                                                    |
| RR | 341 | Talaulikar VS, Arulkumaran S. Medico-legal issues with CTG interpretation. <i>Current Women's Health Reviews.</i> 2013;9(3):145-57.                                                                                                                                                                                                       |
| RR | 342 | Yadav R, Shah AK, Loeb JA, Swamy MNS, Agarwal R. Morphology-based automatic seizure detector for intracerebral EEG recordings. <i>IEEE Transactions on Biomedical Engineering.</i> 2012;59(7):1871-81.                                                                                                                                    |
| RR | 343 | Crawford C, Lee C, Freilich D, Buckenmaier CC, Crawford P, Delgado R, et al. Effectiveness of active self-care complementary and integrative medicine therapies: Options for the management of chronic pain symptoms. <i>Pain Medicine (United States).</i> 2014;15(S1):S86-S95.                                                          |
| RR | 344 | Toomey E, Currie-Murphy L, Matthews J, Hurley DA. Implementation fidelity of physiotherapist-delivered group education and exercise interventions to promote self-management in people with osteoarthritis and chronic low back pain: a rapid review part II. <i>Manual Therapy.</i> 2015;20(2):287-94.                                   |
| RR | 345 | Treanor CJ, Donnelly M. The late effects of cancer and cancer treatment: a rapid review. <i>The Journal Of Community And Supportive Oncology.</i> 2014;12(4):137-48.                                                                                                                                                                      |
| RR | 346 | Miani C, Ball S, Pitchforth E, Exley J, King S, Roland M, et al. Organisational interventions to reduce length of stay in hospital: a rapid evidence assessment. 2014.                                                                                                                                                                    |
| RR | 347 | Kilpatrick C, Murdoch H, Paterson A. The rapid delivery of national evidence based recommendations for HAI care bundles. <i>Antimicrobial Resistance and Infection Control.</i> 2013;2.                                                                                                                                                   |
| RR | 348 | Attipoe S, Zeno SA, Lee C, Crawford C, Khorsan R, Walter AR, et al. Tyrosine for Mitigating Stress and Enhancing Performance in Healthy Adult Humans, a Rapid Evidence Assessment of the Literature. <i>Military Medicine.</i> 2015;180(7):754-65.                                                                                        |
| RR | 349 | Lee C, Crawford C, Buckenmaier C, Schoomaker E, Delgado R, York A. Active, self-care complementary and integrative medicine therapies for the management of chronic pain symptoms: A rapid evidence assessment of the literature. <i>Journal of Alternative and Complementary Medicine.</i> 2014;20(5):A137-A8.                           |
| RR | 350 | Nancarrow SA, Roots A, Grace S, Saberi V. Models of care involving district hospitals: a rapid review to inform the Australian rural and remote context. <i>Australian Health Review: A Publication Of The Australian Hospital Association.</i> 2015.                                                                                     |
| RR | 351 | Bungay H, Vella-Burrows T. The effects of participating in creative activities on the health and well-being of children and young people: a rapid review of the literature. <i>Perspectives In Public Health.</i> 2013;133(1):44-52.                                                                                                      |
| RR | 352 | Polisena J, Garrity C, Kamel C, Stevens A, Abou-Setta AM. Rapid review programs to support health care and policy decision making: a descriptive analysis of processes and methods. <i>Systematic Reviews.</i> 2015;4:26-.                                                                                                                |
| RR | 353 | Fitzpatrick-Lewis D, Ganann R, Krishnaratne S, Ciliska D, Kouyoumdjian F, Hwang SW. Effectiveness of interventions to improve the health and housing status of homeless people: a rapid systematic review. <i>BMC public health.</i> 2011;11:638.                                                                                         |
| RR | 354 | Belshaw Z, Asher L, Harvey ND, Dean RS. Quality of life assessment in domestic dogs: An evidence-based rapid review. <i>Veterinary Journal.</i> 2015.                                                                                                                                                                                     |
| RR | 355 | Tricco AC, Zarin W, Antony J, Hutton B, Moher D, Sherfali D, et al. An international survey and modified Delphi approach revealed numerous rapid review methods. <i>Journal Of Clinical Epidemiology.</i> 2015.                                                                                                                           |
| RR | 356 | Mobiniazadeh M, Oliyaeemanesh A, Doaee S, Nejati M, Aboee P, Azadbakht M, et al. Health technology assessment of infliximab: A rapid review of type 2 studies. <i>Journal of Isfahan Medical School.</i> 2012;30(178).                                                                                                                    |
| RR | 357 | York A, Crawford C, Walter A, Walter JAG, Jonas WB, Coeytaux R. Acupuncture research in military and veteran populations: A rapid evidence assessment of the literature. <i>Medical Acupuncture.</i> 2011;23(4):229-36.                                                                                                                   |
| RR | 358 | Cai J-Q, Chen K, Mou Y-P, Pan Y, Xu X-W, Zhou Y-C, et al. Laparoscopic versus open wedge resection for gastrointestinal stromal tumors of the stomach: a single-center 8-year retrospective cohort study of 156 patients with long-term follow-up. <i>BMC Surgery.</i> 2015;15:58-.                                                       |



|    |     |                                                                                                                                                                                                                                                                                                                                             |
|----|-----|---------------------------------------------------------------------------------------------------------------------------------------------------------------------------------------------------------------------------------------------------------------------------------------------------------------------------------------------|
| RR | 359 | Visnansky M, Mesaros S. Patient self-testing of oral anticoagulation therapy by coaguchek® xs system. Rapid health technology assessment in Slovak health care environment. <i>Value in Health</i> . 2011;14(7):A257-A8.                                                                                                                    |
| RR | 360 | Turner RM, Bird SM, Higgins JPT. The impact of study size on meta-analyses: examination of underpowered studies in Cochrane reviews. <i>Plos One</i> . 2013;8(3):e59202-e.                                                                                                                                                                  |
| RR | 361 | Hersi M, Stevens A, Quach P, Hamel C, Thavorn K, Garritty C, et al. Effectiveness of Personal Protective Equipment for Healthcare Workers Caring for Patients with Filovirus Disease: A Rapid Review. <i>Plos One</i> . 2015;10(10):e0140290-e.                                                                                             |
| RR | 362 | Doaee S, Mobinizadeh M, Oliyaeemanesh A. Rapid health technology assessment in rehabilitation hospital: Review article. <i>Journal of Isfahan Medical School</i> . 2013;31(237).                                                                                                                                                            |
| RR | 363 | Chao ST, Meier T, Godley A, Hugebeck B, Kolar M, Barrett P, et al. One-year experience with the workflow enhancement (we) team: Does continuous improvement have to be continuous? <i>International Journal of Radiation Oncology Biology Physics</i> . 2014;90(1):S744.                                                                    |
| RR | 364 | Kelly BJ, Perkins DA, Fuller JD, Parker SM. Shared care in mental illness: A rapid review to inform implementation. <i>International Journal Of Mental Health Systems</i> . 2011;5:31-.                                                                                                                                                     |
| RR | 365 | Lee C, Crawford C, Teo L, Spevak C. An analysis of the various chronic pain conditions captured in a systematic review of active self-care complementary and integrative medicine therapies for the management of chronic pain symptoms. <i>Pain Medicine (Malden, Mass)</i> . 2014;15 Suppl 1:S96-S103.                                    |
| RR | 366 | Hayden JA, Killian L, Zygmunt A, Babineau J, Martin-Misener R, Jensen JL, et al. Methods of a multi-faceted rapid knowledge synthesis project to inform the implementation of a new health service model: Collaborative Emergency Centres. <i>Systematic Reviews</i> . 2015;4(1).                                                           |
| RR | 367 | Toomey E, Currie-Murphy L, Matthews J, Hurley DA. The effectiveness of physiotherapist-delivered group education and exercise interventions to promote self-management for people with osteoarthritis and chronic low back pain: a rapid review part I. <i>Manual Therapy</i> . 2015;20(2):265-86.                                          |
| RR | 368 | Tse Y, Charters H. Rapid response to safety incidences in a children's hospital-reconstructing a system fit for the Francis report era. <i>Archives of Disease in Childhood</i> . 2014;99:A201.                                                                                                                                             |
| RR | 369 | McMurrin M. Individual-level interventions for alcohol-related violence: A rapid evidence assessment. <i>Criminal Behaviour and Mental Health</i> . 2011.                                                                                                                                                                                   |
| RR | 370 | Twycross A, Parker R, Williams A, Gibson F. Cancer-Related Pain and Pain Management: Sources, Prevalence, and the Experiences of Children and Parents. <i>Journal Of Pediatric Oncology Nursing: Official Journal Of The Association Of Pediatric Oncology Nurses</i> . 2015;32(6):369-84.                                                  |
| RR | 371 | Vujanic G, Sandstedt B, Leuschner I, Sznajder B. Central pathology review in multicentre tumour trials-do we really need it? <i>Pediatric Blood and Cancer</i> . 2011;57(5):742.                                                                                                                                                            |
| RR | 372 | Mahon S, Redmond S, Carney P. Transparency of the medicines reimbursement system in Ireland: A quantitative analysis of the influences on reimbursement decisions [2006-2013]. <i>Value in Health</i> . 2013;16(7):A459.                                                                                                                    |
| RR | 373 | Treatments for Constipation: A Review of Systematic Reviews. Canadian Agency for Drugs and Technologies in Health Rapid Response Reports. 2014.                                                                                                                                                                                             |
| RR | 374 | Featherstone RM, Dryden DM, Foisy M, Guise J-M, Mitchell MD, Paynter RA, et al. Advancing knowledge of rapid reviews: an analysis of results, conclusions and recommendations from published review articles examining rapid reviews. <i>Systematic Reviews</i> . 2015;4:50-.                                                               |
| RR | 375 | Geng Y, Fowler CS, Fulton S. Clinical librarian support for rapid review of clinical utility of cancer molecular biomarkers. <i>Medical Reference Services Quarterly</i> . 2015;34(2):202-14.                                                                                                                                               |
| RR | 376 | Beani JC. Solar protection products: Efficacy and risks. <i>Annales de Dermatologie et de Venereologie</i> . 2012;139(4):261-72.                                                                                                                                                                                                            |
| RR | 377 | Moeller-Saxone K, Davis E, Herrman H. Promoting mental health in Asia-Pacific: Systematic review focusing on Thailand and China. <i>Asia-Pacific Psychiatry: Official Journal Of The Pacific Rim College Of Psychiatrists</i> . 2015;7(4):355-65.                                                                                           |
| RR | 378 | Ju H, Hewson K. Health technology assessment and evidence-based policy making: Queensland Department of Health experience. <i>International Journal Of Technology Assessment In Health Care</i> . 2014;30(6):595-600.                                                                                                                       |
| RR | 379 | Manrique EJC, Souza NLA, Tavares SBN, Albuquerque ZBP, Zeferino LC, Amaral RG. Analysis of the performance of 100% rapid review using an average time of 1 and 2 minutes according to the quality of cervical cytology specimens. <i>Cytopathology: Official Journal Of The British Society For Clinical Cytology</i> . 2011;22(3):195-201. |
| RR | 380 | Bragge P, Piccenna L, Middleton JW, Williams S, Creasey G, Dunlop S, et al. Developing a spinal cord injury research strategy using a structured process of evidence review and stakeholder dialogue. Part I: rapid review of SCI prioritisation literature. <i>Spinal Cord</i> . 2015;53(10):714-20.                                       |
| RR | 381 | Lee C, Crawford C, Hickey A. Mind-body therapies for the self-management of chronic pain symptoms. <i>Pain Medicine (Malden, Mass)</i> . 2014;15 Suppl 1:S21-S39.                                                                                                                                                                           |
| RR | 382 | Luckett T, Phillips J, Agar M, Virdun C, Green A, Davidson PM. Elements of effective palliative care models: a rapid review. <i>BMC Health Services Research</i> . 2014;14:136-.                                                                                                                                                            |
| RR | 383 | Van De Velde S, De Buck E, Dieltjens T, Aertgeerts B. Medicinal use of potato-derived products: Conclusions of a rapid versus full systematic review. <i>Phytotherapy Research</i> . 2011;25(5):787-8.                                                                                                                                      |

|    |     |                                                                                                                                                                                                                                                                                                                                                                 |
|----|-----|-----------------------------------------------------------------------------------------------------------------------------------------------------------------------------------------------------------------------------------------------------------------------------------------------------------------------------------------------------------------|
| RR | 384 | Szmuda T, Sloniewski P, Waszak PM, Springer J, Szmuda M. Towards a new treatment paradigm for ruptured blood blister-like aneurysms of the internal carotid artery? A rapid systematic review. <i>Journal Of Neurointerventional Surgery</i> . 2015.                                                                                                            |
| RR | 385 | Heard T, Chandra A, Culora G, Gupta SS, Herbert A, Morgan M. Use of the ThinPrep Imaging System for internal quality control of cervical cytology. <i>Cytopathology: Official Journal Of The British Society For Clinical Cytology</i> . 2013;24(4):246-53.                                                                                                     |
| RR | 386 | Qi Q, Fang G, Chen YX, Liu Y, Zhou CL, Wang J, et al. Mass vaccination campaign of hepatitis a vaccine and measles-mumps-rubella live attenuated vaccine in children in stricken regions of 4.20 lushan earthquake in Sichuan Province. <i>Chinese Journal of Evidence-Based Medicine</i> . 2014;14(5):501-4.                                                   |
| RR | 387 | Migliore A, Jefferson T, Cerbo M, Abraha I, Montedori A. Implantable devices for the closure of patent foramen ovale in adults: an Italian rapid health technology assessment. <i>Expert Review Of Medical Devices</i> . 2014;11(2):151-61.                                                                                                                     |
| RR | 388 | Polisena J, Garritty C, Umscheid CA, Kamel C, Samra K, Smith J, et al. Rapid Review Summit: an overview and initiation of a research agenda. <i>Systematic Reviews</i> . 2015;4:111-.                                                                                                                                                                           |
| RR | 389 | Lavery B, Orton S, Baker H, Ross J, Walsh R, Stevens R, et al. Transforming follow-up: Patients as true partners in a major multi-disciplinary change project. <i>European Journal of Cancer</i> . 2013;49:S438.                                                                                                                                                |
| RR | 390 | Venugopal S, Blundell J, Raja Sri A, Bennett G. Current management of iron deficiency in pregnancy at a district general hospital. <i>British Journal of Haematology</i> . 2013;161:74.                                                                                                                                                                         |
| RR | 391 | Mattivi JT, Buchberger B. [Rapid Reviews: Sisyphos' Salvation? - An Inventory]. <i>Gesundheitswesen (Bundesverband Der Arzte Des Offentlichen Gesundheitsdienstes (Germany))</i> . 2015.                                                                                                                                                                        |
| RR | 392 | Wolfenden L, Carruthers J, Wyse R, Yoong S. Translation of tobacco control programs in schools: findings from a rapid review of systematic reviews of implementation and dissemination interventions. <i>Health Promotion Journal Of Australia: Official Journal Of Australian Association Of Health Promotion Professionals</i> . 2014;25(2):136-8.            |
| RR | 393 | Van der Scheer-Horst ES, van Benthem PPG, Bruitjes TD, van Leeuwen RB, van der Zaag-Loonen HJ. The efficacy of vestibular rehabilitation in patients with benign paroxysmal positional vertigo: a rapid review. <i>Otolaryngology--Head And Neck Surgery: Official Journal Of American Academy Of Otolaryngology-Head And Neck Surgery</i> . 2014;151(5):740-5. |
| RR | 394 | Antidepressants in Elderly Patients with Major and Minor Depression: A Review of Clinical Effectiveness and Guidelines. Canadian Agency for Drugs and Technologies in Health Rapid Response Reports. 2015.                                                                                                                                                      |
| RR | 395 | Yadav R, Shah AK, Loeb JA, Swamy MN, Agarwal R. A novel unsupervised spike sorting algorithm for intracranial EEG. Conference proceedings : Annual International Conference of the IEEE Engineering in Medicine and Biology Society IEEE Engineering in Medicine and Biology Society Conference. 2011;2011:7545-8.                                              |
| RR | 396 | Tricco AC, Antony J, Zarin W, Striffler L, Ghassemi M, Ivory J, et al. A scoping review of rapid review methods. <i>BMC Medicine</i> . 2015;13(1).                                                                                                                                                                                                              |
| RR | 397 | Golfam M, Beall R, Brehaut J, Saeed S, Relton C, Ashbury FD, et al. Comparing alternative design options for chronic disease prevention interventions. <i>European Journal Of Clinical Investigation</i> . 2015;45(1):87-99.                                                                                                                                    |
| RR | 398 | Van der Veen EL, van Hulst RA, de Ru JA. Hyperbaric Oxygen Therapy in Acute Acoustic Trauma: A Rapid Systematic Review. <i>Otolaryngology--Head And Neck Surgery: Official Journal Of American Academy Of Otolaryngology-Head And Neck Surgery</i> . 2014;151(1):42-5.                                                                                          |
| RR | 399 | Vogus A, Graff K. PEPFAR Transitions to Country Ownership: Review of Past Donor Transitions and Application of Lessons Learned to the Eastern Caribbean. <i>Global Health, Science And Practice</i> . 2015;3(2):274-86.                                                                                                                                         |
| RR | 400 | Liew Y, De Berker D, Sansom J. Rapid clinical review of patients assessed by a teledermatology service: Analysis of pathways and outcomes. <i>British Journal of Dermatology</i> . 2014;171:138.                                                                                                                                                                |
| RR | 401 | Hwang EH, Hwang M, Shin BC, Lee GS. Effect of Tai Chi as therapeutic exercise on blood pressure: Rapid systematic review. <i>Journal of Alternative and Complementary Medicine</i> . 2014;20(5):A57.                                                                                                                                                            |
| RR | 402 | Banbury A, Roots A, Nancarrow S. Rapid review of applications of e-health and remote monitoring for rural residents. <i>The Australian Journal Of Rural Health</i> . 2014;22(5):211-22.                                                                                                                                                                         |
| RR | 403 | Souza KM, Goncalves L. HTA studies on orphan drugs by rebratsxmembers. <i>Value in Health</i> . 2014;17(7):A540.                                                                                                                                                                                                                                                |
| RR | 404 | Briand C, Menear M. Implementing a continuum of evidence-based psychosocial interventions for people with severe mental illness: Part 2 - Review of critical implementation issues. <i>Canadian Journal of Psychiatry</i> . 2014;59(4):187-95.                                                                                                                  |
| RR | 405 | Exploring the method and process of rapid review. <i>Chinese Journal of Evidence-Based Medicine</i> . 2014;14(5):497-500.                                                                                                                                                                                                                                       |
| RR | 406 | Parker S, Fuller J. Are nurses well placed as care co-ordinators in primary care and what is needed to develop their role: a rapid review? <i>Health &amp; Social Care In The Community</i> . 2015.                                                                                                                                                             |
| RR | 407 | Ball K, Carver A, Downing K, Jackson M, O'Rourke K. Addressing the social determinants of inequities in physical activity and sedentary behaviours. <i>Health Promotion International</i> . 2015;30 Suppl 2:ii8-ii19.                                                                                                                                           |

|        |     |                                                                                                                                                                                                                                                                                                                                     |
|--------|-----|-------------------------------------------------------------------------------------------------------------------------------------------------------------------------------------------------------------------------------------------------------------------------------------------------------------------------------------|
| RR     | 408 | Bavolek RA, Aubin CD, Kim AJ. Team-based learning: Electrocardiogram interpretation and application for emergency medicine residents. <i>Academic Emergency Medicine</i> . 2013;20(5):S346.                                                                                                                                         |
| RR     | 409 | Li A, Giaddui T, Chen W, Cui Y, McNulty S, Freedman G, et al. An analysis of rapid review cases that failed to meet the RTOG 1005 contouring and dose-volume criteria. <i>International Journal of Radiation Oncology Biology Physics</i> . 2013;87(2):S228.                                                                        |
| RR     | 410 | Neville FG, Goodall CA, Williams DJ, Donnelly PD. Violence brief interventions: A rapid review. <i>Aggression and Violent Behavior</i> . 2014;19(6):692-8.                                                                                                                                                                          |
| RR     | 411 | Wegner I, Niesten MEF, van Werkhoven CH, Grolman W. Rapid Systematic Review of the Epley Maneuver versus Vestibular Rehabilitation for Benign Paroxysmal Positional Vertigo. <i>Otolaryngology--Head And Neck Surgery: Official Journal Of American Academy Of Otolaryngology-Head And Neck Surgery</i> . 2014;151(2):201-7.        |
| RR     | 412 | Oh J, Calabresi PA. Emerging injectable therapies for multiple sclerosis. <i>The Lancet Neurology</i> . 2013;12(11):1115-26.                                                                                                                                                                                                        |
| RR     | 413 | Phillips J. Palliative care systems: Evidence for key models of care elements. <i>Asia-Pacific Journal of Clinical Oncology</i> . 2013;9:95.                                                                                                                                                                                        |
| RR     | 414 | Hinchliffe A. Minor ailments schemes: A rapid review of the evidence. <i>International Journal of Pharmacy Practice</i> . 2012;20:39-40.                                                                                                                                                                                            |
| RR     | 415 | Loveday HP, Wilson JA, Kerr K, Pitchers R, Walker JT, Browne J. Association between healthcare water systems and <i>Pseudomonas aeruginosa</i> infections: a rapid systematic review. <i>The Journal Of Hospital Infection</i> . 2014;86(1):7-15.                                                                                   |
| RR     | 416 | Do Nascimento Tavares SB, De Souza NLA, Manrique EJC, Azara CZS, Da Silveira EA, Amaral RG. Internal quality control for cervical cytopathology: Comparison of potential false-negatives detected at rapid prescreening and at 100% rapid review. <i>Acta Cytologica</i> . 2014;58(5):439-45.                                       |
| RR     | 417 | Konnyu KJ, Kwok E, Skidmore B, Moher D. The effectiveness and safety of emergency department short stay units: a rapid review. <i>Open Medicine: A Peer-Reviewed, Independent, Open-Access Journal</i> . 2012;6(1):e10-e6.                                                                                                          |
| RR     | 418 | Gabapentin for Adults with Neuropathic Pain: A Review of the Clinical Evidence and Guidelines. Canadian Agency for Drugs and Technologies in Health Rapid Response Reports. 2014.                                                                                                                                                   |
| RR     | 419 | Harker J, Kleijnen J. What is a rapid review? A methodological exploration of rapid reviews in Health Technology Assessments. <i>International Journal Of Evidence-Based Healthcare</i> . 2012;10(4):397-410.                                                                                                                       |
| RR     | 420 | McCullough AL, Haycock JC, Forward DP, Moran CG. Early management of the severely injured major trauma patient. <i>British Journal Of Anaesthesia</i> . 2014;113(2):234-41.                                                                                                                                                         |
| RR     | 421 | Munn Z, Lockwood C, Moola S. The Development and Use of Evidence Summaries for Point of Care Information Systems: A Streamlined Rapid Review Approach. <i>Worldviews On Evidence-Based Nursing / Sigma Theta Tau International, Honor Society Of Nursing</i> . 2015;12(3):131-8.                                                    |
| RR     | 422 | Fiscella K, Tobin JN, Carroll JK, He H, Ogedegbe G. Ethical oversight in quality improvement and quality improvement research: new approaches to promote a learning health care system. <i>BMC Medical Ethics</i> . 2015;16(1):63-.                                                                                                 |
| RR     | 423 | Davis C, Tomas J. Care of the dying: how do we replace the Liverpool Care Pathway? <i>British Medical Bulletin</i> . 2014;112(1):5-15.                                                                                                                                                                                              |
| RR     | 424 | Blank L, Coster J, O' Cathain A, Knowles E, Tosh J, Turner J, et al. The appropriateness of, and compliance with, telephone triage decisions: a systematic review and narrative synthesis. <i>Journal Of Advanced Nursing</i> . 2012;68(12):2610-21.                                                                                |
| RR     | 425 | Oh HC, Ng WH. Rapid health technology assessment-intrathecal baclofen pump therapy for intractable spasticity. <i>Proceedings of Singapore Healthcare</i> . 2011;20:66.                                                                                                                                                             |
| RR     | 426 | Drennan VM, Halter M, Brearley S, Carneiro W, Gabe J, Gage H, et al. Investigating the contribution of physician assistants to primary care in England: a mixed-methods study. 2014.                                                                                                                                                |
| RR     | 427 | Dangott B, Salama M. Automated image analysis and scoring of tartrate resistance acid phosphatase preparations. <i>Laboratory Investigation</i> . 2012;92:331A.                                                                                                                                                                     |
| RR     | 428 | Hinrichs S, Jahagirdar D, Miani C, Guerin B, Nolte E. Learning for the NHS on procurement and supply chain management: a rapid evidence assessment. <i>NIHR Journals Library</i> . 2014.                                                                                                                                            |
| RR     | 429 | Brearley SG, Stamatakis Z, Addington-Hall J, Foster C, Hodges L, Jarrett N, et al. The physical and practical problems experienced by cancer survivors: a rapid review and synthesis of the literature. <i>European Journal Of Oncology Nursing: The Official Journal Of European Oncology Nursing Society</i> . 2011;15(3):204-12. |
| RR     | 430 | Moyad MA. Heart health = urologic health and heart unhealthy = urologic unhealthy: Rapid review of lifestyle changes and dietary supplements. <i>Urologic Clinics of North America</i> . 2011;38(3):359-67.                                                                                                                         |
| CRD RR | 431 | Pre-emptive oral non-steroidal anti-inflammatory drugs or acetaminophen for knee arthroscopy: a rapid review (Structured abstract). <i>Health Technology Assessment Database [Internet]</i> . 2014; (3).                                                                                                                            |
| CRD RR | 432 | Pron G. Coronary revascularization in ischemic heart failure patients: a rapid review (Structured abstract). <i>Health Technology Assessment Database [Internet]</i> . 2013; (3).                                                                                                                                                   |
| CRD RR | 433 | Schaink A, Lambrinos A. Vasodilators for in-hospital heart failure management: a rapid review (update) (Structured abstract). <i>Health Technology Assessment Database [Internet]</i> . 2015; (3).                                                                                                                                  |
| CRD RR | 434 | Brener S. Local infiltration analgesia in hip and knee arthroplasty: a rapid review (Structured abstract). <i>Health Technology Assessment Database [Internet]</i> . 2013; (3).                                                                                                                                                     |



|        |     |                                                                                                                                                                                                                                                                                                |
|--------|-----|------------------------------------------------------------------------------------------------------------------------------------------------------------------------------------------------------------------------------------------------------------------------------------------------|
| CRD RR | 435 | Bracing after knee arthroscopy: a rapid review (Structured abstract). Health Technology Assessment Database [Internet]. 2014; (3).                                                                                                                                                             |
| CRD RR | 436 | Preoperative shower or bath with antiseptics before knee arthroscopy: a rapid review (Structured abstract). Health Technology Assessment Database [Internet]. 2014; (3).                                                                                                                       |
| CRD RR | 437 | Pron G. Early mobilization and ambulation in hospitalized heart failure patients: a rapid review (Structured abstract). Health Technology Assessment Database [Internet]. 2013; (3).                                                                                                           |
| CRD RR | 438 | Intra-articular analgesia after knee arthroscopy: a rapid review (Structured abstract). Health Technology Assessment Database [Internet]. 2014; (3).                                                                                                                                           |
| CRD RR | 439 | Costello RB, Lentino CV, Boyd CC, O'Connell ML, Crawford CC, Sprengel ML, et al. The effectiveness of melatonin for promoting healthy sleep: a rapid evidence assessment of the literature (Provisional abstract). Database of Abstracts of Reviews of Effects [Internet]. 2014; (2):[106 p.]. |
| CRD RR | 440 | Monotherapy versus combination therapy for adults hospitalized for community-acquired pneumonia: a rapid review (Structured abstract). Health Technology Assessment Database [Internet]. 2013; (3).                                                                                            |
| CRD RR | 441 | Cost-effectiveness of urgent care for transient ischemic attack: an economic rapid review (Structured abstract). Health Technology Assessment Database [Internet]. 2015; (3).                                                                                                                  |
| CRD RR | 442 | Birmingham SL. Pulmonary rehabilitation setting for adults with chronic obstructive pulmonary disease (COPD): an economic rapid review (Structured abstract). Health Technology Assessment Database [Internet]. 2015; (3).                                                                     |
| CRD RR | 443 | McMartin K. Preoperative cardiac stress tests for noncardiac surgery: a rapid review (Structured abstract). Health Technology Assessment Database [Internet]. 2014; (3).                                                                                                                       |
| CRD RR | 444 | Hemoglobin A1c testing in diabetes: a rapid review (Structured abstract). Health Technology Assessment Database [Internet]. 2014; (3).                                                                                                                                                         |
| CRD RR | 445 | Migliore A, Jefferson T, Cerbo M, Abraha I, Montedori A. Implantable devices for the closure of patent foramen ovale in adults: an Italian rapid health technology assessment (Provisional abstract). Database of Abstracts of Reviews of Effects [Internet]. 2014; (2):[151-61 pp.].          |
| CRD RR | 446 | Schlink A. Optimized timing of thrombolytic therapy for the treatment of stroke: a rapid review (Structured abstract). Health Technology Assessment Database [Internet]. 2013; (3).                                                                                                            |
| CRD RR | 447 | Luckett T, Phillips J, Agar M, Virdun C, Green A, Davidson PM. Elements of effective palliative care models: a rapid review (Provisional abstract). BMC Health Services Research [Internet]. 2014; 14(1):[136 p.].                                                                             |
| CRD RR | 448 | Dorresteyn PM, Ipenburg NA, Murphy KJ, Smit M, Vulpen JK, Wegner I, et al. Rapid systematic review of normal audiometry results as a predictor for benign paroxysmal positional vertigo (Provisional abstract). Otolaryngology - Head and Neck Surgery [Internet]. 2014; 150(6):[919-24 pp.].  |
| CRD RR | 449 | Roberfroid D, San Miguel L, Paulus D. Non-invasive markers of subclinical atherosclerosis for predicting a primary cardiovascular event: a rapid systematic review (Structured abstract). Health Technology Assessment Database [Internet]. 2015; (3).                                         |
| CRD RR | 450 | Fergenbaum J. Harms of Prostate-Specific Antigen (PSA) screening in prostate cancer: a rapid review (Structured abstract). Health Technology Assessment Database [Internet]. 2015; (3).                                                                                                        |
| CRD RR | 451 | Total hip arthroplasty versus hemiarthroplasty for displaced femoral neck fractures: a rapid review (Structured abstract). Health Technology Assessment Database [Internet]. 2013; (3).                                                                                                        |
| CRD RR | 452 | Brener S. Anesthesia among patients undergoing knee arthroplasty: a rapid review (Structured abstract). Health Technology Assessment Database [Internet]. 2013; (3).                                                                                                                           |
| CRD RR | 453 | Nikitovic M. Antibiotic-laden bone cement for primary knee arthroplasty: a rapid review (Structured abstract). Health Technology Assessment Database [Internet]. 2013; (3).                                                                                                                    |
| CRD RR | 454 | Nikitovic M. Clinical utility of echocardiography for patients with hip fracture: a rapid review (Structured abstract). Health Technology Assessment Database [Internet]. 2013; (3).                                                                                                           |
| CRD RR | 455 | Ghazipura M. Shorter versus longer duration of antibiotic therapy in patients with community-acquired pneumonia: a rapid review (Structured abstract). Health Technology Assessment Database [Internet]. 2013; (3).                                                                            |
| CRD RR | 456 | Ghazipura M. Care coordination on postacute stroke, chronic obstructive pulmonary disease, and heart failure clients: a rapid review (Structured abstract). Health Technology Assessment Database [Internet]. 2015; (3).                                                                       |
| CRD RR | 457 | Ghazipura M. Usefulness of urinary antigen testing for Legionella in the treatment of community-acquired pneumonia: a rapid review (Structured abstract). Health Technology Assessment Database [Internet]. 2013; (3).                                                                         |
| CRD RR | 458 | Chaiyachati KH, Ogbuaji O, Price M, Suthar AB, Negussie EK, Barnighausen T. Interventions to improve adherence to antiretroviral therapy: a rapid systematic review (Provisional abstract). Database of Abstracts of Reviews of Effects [Internet]. 2014; (2):[S187-s204 pp.].                 |
| CRD RR | 459 | Brener S. Optimal timing of hip fracture surgery: a rapid review (Structured abstract). Health Technology Assessment Database [Internet]. 2013; (3).                                                                                                                                           |
| CRD RR | 460 | Scheer-Horst ES, Benthem PP, Bruinijes TD, Leeuwen RB, Zaag-Loonen HJ. The efficacy of vestibular rehabilitation in patients with benign paroxysmal positional vertigo: a rapid review (Provisional abstract). Database of Abstracts of Reviews of Effects [Internet]. 2014; (2):[740-5 pp.].  |

|        |     |                                                                                                                                                                                                                                                                                                                                                           |
|--------|-----|-----------------------------------------------------------------------------------------------------------------------------------------------------------------------------------------------------------------------------------------------------------------------------------------------------------------------------------------------------------|
| CRD RR | 461 | Hinrichs S, Jahagirdar D, Miani C, Guerin B, Nolte E. Learning for the NHS on procurement and supply chain management: a rapid evidence assessment (Structured abstract). Health Technology Assessment Database [Internet]. 2014; (3).                                                                                                                    |
| CRD RR | 462 | Toomey E, Currie-Murphy L, Matthews J, Hurley DA. The effectiveness of physiotherapist-delivered group education and exercise interventions to promote self-management for people with osteoarthritis and chronic low back pain: rapid review Part I (Provisional abstract). Database of Abstracts of Reviews of Effects [Internet]. 2014; (2);[epub p.]. |
| CRD RR | 463 | Simultaneous or staged bilateral knee arthroplasty: a rapid review (Structured abstract). Health Technology Assessment Database [Internet]. 2013; (3).                                                                                                                                                                                                    |
| CRD RR | 464 | Brener S. The effectiveness of cement in primary hip replacements: a rapid review (Structured abstract). Health Technology Assessment Database [Internet]. 2013; (3).                                                                                                                                                                                     |
| CRD RR | 465 | Dennett L, Harstall C. Stingray catheter and guidewire for recanalization of coronary chronic total occlusions: A rapid evidence assessment (Structured abstract). Health Technology Assessment Database [Internet]. 2013; (3);[28 p.].                                                                                                                   |
| CRD RR | 466 | Turner J, Preston L, Booth A, O'Keeffe C, Campbell F, Jesurasa A, et al. What evidence is there for a relationship between organisational features and patient outcomes in congenital heart disease services? A rapid review (Structured abstract). Health Technology Assessment Database [Internet]. 2014; (3).                                          |
| CRD RR | 467 | Wegner I, Niesten ME, Werkhoven CH, Grolman W. Rapid systematic review of the Epley maneuver versus vestibular rehabilitation for benign paroxysmal positional vertigo (Provisional abstract). Database of Abstracts of Reviews of Effects [Internet]. 2014; (2);[201-7 pp.].                                                                             |
| CRD RR | 468 | Antibiotic coverage in atypical pathogens for adults hospitalized with community-acquired pneumonia: a rapid review (Structured abstract). Health Technology Assessment Database [Internet]. 2013; (3).                                                                                                                                                   |
| CRD RR | 469 | Brener S. Electrocardiograms for diagnosing ischemia as a precipitant to acute heart failure: a rapid review (Structured abstract). Health Technology Assessment Database [Internet]. 2013; (3).                                                                                                                                                          |
| CRD RR | 470 | Schaink A. Vasodilators for in-hospital heart failure management: a rapid review (Structured abstract). Health Technology Assessment Database [Internet]. 2013; (3).                                                                                                                                                                                      |
| CRD RR | 471 | Severity assessment tools for patients with community-acquired pneumonia: a rapid review (Structured abstract). Health Technology Assessment Database [Internet]. 2013; (3).                                                                                                                                                                              |
| CRD RR | 472 | Reinink H, Wegner I, Stegeman I, Grolman W. Rapid systematic review of repeated application of the Epley maneuver for treating posterior BPPV (Provisional abstract). Database of Abstracts of Reviews of Effects [Internet]. 2014; (2);[399-406 pp.].                                                                                                    |
| CRD RR | 473 | Effect of a 60-minute door-to-needle tissue plasminogen activator on stroke disability: a rapid review (Structured abstract). Health Technology Assessment Database [Internet]. 2015; (3).                                                                                                                                                                |
| CRD RR | 474 | Brener S. Chest X-rays for diagnosing pulmonary infection as a precipitant of acute heart failure: a rapid review (Structured abstract). Health Technology Assessment Database [Internet]. 2013; (3).                                                                                                                                                     |
| CRD RR | 475 | Predictive validity of tools used to assess the risk of unplanned admissions: A rapid review of the evidence (Structured abstract). Health Technology Assessment Database [Internet]. 2014; (3).                                                                                                                                                          |
| CRD RR | 476 | Testing vitamin B12 levels in neuropathy, alopecia, dizziness, and fatigue: a rapid review (Structured abstract). Health Technology Assessment Database [Internet]. 2014; (3).                                                                                                                                                                            |
| CRD RR | 477 | Ultrafiltration in heart failure: a rapid review (Structured abstract). Health Technology Assessment Database [Internet]. 2015; (3).                                                                                                                                                                                                                      |
| CRD RR | 478 | Optimal onset-to-admission interval for inpatient stroke rehabilitation: a rapid review (Structured abstract). Health Technology Assessment Database [Internet]. 2013; (3).                                                                                                                                                                               |
| CRD RR | 479 | Jang BH, Lee HY, Jung YJ, An JH. Efficacy of atomoxetine and methylphenidate in attention deficits hyperactivity disorder in adults: a rapid review (Structured abstract). Health Technology Assessment Database [Internet]. 2012; (3).                                                                                                                   |
| CRD RR | 480 | Bond K, Dennett L, Harstall C, Yan C, Chuck A. Total prosthetic replacement of the temporomandibular joint: a rapid evidence assessment and economic analysis (Structured abstract). Health Technology Assessment Database [Internet]. 2013; (3).                                                                                                         |
| CRD RR | 481 | Sehatazadeh S. Effectiveness of increased intensity of rehabilitation in post-stroke patients: a rapid review (Structured abstract). Health Technology Assessment Database [Internet]. 2013; (3).                                                                                                                                                         |
| CRD RR | 482 | Yang ZX, Shen JT, Li YP, Zhao K, Shi CH, Xiao Y, et al. Helical tomotherapy for cancer treatment: a rapid health technology assessment (Provisional abstract). Database of Abstracts of Reviews of Effects [Internet]. 2014; (2);[192-218 pp.].                                                                                                           |
| CRD RR | 483 | Sehatazadeh S. Transient ischemic attack: where can patients receive optimal care? A rapid review (Structured abstract). Health Technology Assessment Database [Internet]. 2013; (3).                                                                                                                                                                     |
| CRD RR | 484 | Nikitovic M. Intramedullary nails in comparison with sliding hip screws for intertrochanteric hip fractures: a rapid review (Structured abstract). Health Technology Assessment Database [Internet]. 2013; (3).                                                                                                                                           |
| CRD RR | 485 | McMartin K. B-type natriuretic peptide testing: a rapid review (Structured abstract). Health Technology Assessment Database [Internet]. 2013; (3).                                                                                                                                                                                                        |
| CRD RR | 486 | Nikitovic M. Intensity of rehabilitation during the acute hospitalization period after hip or knee arthroplasty: a rapid review (Structured abstract). Health Technology Assessment Database [Internet]. 2013; (3).                                                                                                                                       |

|        |     |                                                                                                                                                                                                                                                                                                        |
|--------|-----|--------------------------------------------------------------------------------------------------------------------------------------------------------------------------------------------------------------------------------------------------------------------------------------------------------|
| CRD RR | 487 | Criteria for switching from intravenous to oral antibiotics in patients hospitalized with community-acquired pneumonia: a rapid review (Structured abstract). Health Technology Assessment Database [Internet]. 2013; (3).                                                                             |
| CRD RR | 488 | Duijn JG, Isfordink LM, Nij Bijvank JA, Stapper CW, Vuren AJ, Wegner I, et al. Rapid systematic review of the Epley maneuver for treating posterior canal benign paroxysmal positional vertigo (Provisional abstract). Database of Abstracts of Reviews of Effects [Internet]. 2014; (2):[925-32 pp.]. |
| CRD RR | 489 | Brener S. Nerve blocks for pain management in patients with hip fractures: a rapid review (Structured abstract). Health Technology Assessment Database [Internet]. 2013; (3).                                                                                                                          |

CSR: Cochrane systematic reviews; SR: non-Cochrane systematic reviews; RR: rapid reviews; CRD RR: Rapid reviews of the University of York, databases of the Center for Reviews and Dissemination

For peer review only

**Characteristics of stakeholder involvement in systematic and rapid reviews:  
a methodological review in the area of health services research**

**Jonas Feldmann, Milo A. Puhan, Margot Mutsch\***

**Supplementary Table S2:**

**Characteristics of the study population by type of included review**

|                                    | <b>Cochrane<br/>SR (%)</b> | <b>Non-Cochrane<br/>SR (%)</b> | <b>RR (%)</b>             | <b>CRD RR<br/>(%)</b> | <b>Total (%)</b>        |
|------------------------------------|----------------------------|--------------------------------|---------------------------|-----------------------|-------------------------|
| <b>Setting</b>                     |                            |                                |                           |                       |                         |
| Hospital setting,<br>inpatients    | 7 (23)                     | 1 (3)                          | 8 (27)                    | 10 (33)               | 26 (22)                 |
| Outpatients                        | 9 (30)                     | 9 (30)                         | 7 (23)                    | 4 (13)                | 29 (24)                 |
| Home setting                       | 0                          | 3 (10)                         | 0                         | 3 (10)                | 6 (5)                   |
| Community setting                  | 5 (17)                     | 10 (33)                        | 13 (43)                   | 7 (23)                | 35 (29)                 |
| Multiple                           | 9 (30)                     | 5 (17)                         | 0                         | 4 (13)                | 18 (15)                 |
| Other                              | 0                          | 2 (7)                          | 2 (7)                     | 2 (7)                 | 6 (5)                   |
| <b>Population size<sup>1</sup></b> |                            |                                |                           |                       |                         |
| Median<br>(range)                  | 733<br>(0; 390,769)        | 2,846.5<br>(36; 4,650,877)     | 2,717<br>(102; 1,700,000) | 349.5<br>(0; 372,746) | 1,622<br>(0; 4,650,877) |
| <b>Population type</b>             |                            |                                |                           |                       |                         |
| Patients with<br>disease/condition | 18 (60)                    | 18 (60)                        | 20 (67)                   | 26 (87)               | 82 (68)                 |
| Healthy population                 | 9 (30)                     | 8 (27)                         | 9 (30)                    | 3 (10)                | 29 (24)                 |
| Other                              | 3 (10)                     | 4 (13)                         | 1 (3)                     | 1 (3)                 | 9 (8)                   |
| <b>Age range (yrs)</b>             |                            |                                |                           |                       |                         |
| Adults (>18)                       | 20 (67)                    | 14 (47)                        | 13 (43)                   | 25 (83)               | 72 (60)                 |

|                     |         |         |         |          |          |
|---------------------|---------|---------|---------|----------|----------|
| Adolescents (13-18) | 2 (7)   | 1 (3)   | 1 (3)   | 1 (3)    | 5 (4)    |
| Children (0-12)     | 3 (10)  | 1 (3)   | 1 (3)   | 0        | 5 (4)    |
| Youth (0-18)        | 1 (3)   | 2 (7)   | 0       | 0        | 3 (3)    |
| Other subgroups     | 1 (3)   | 6 (20)  | 2 (7)   | 3 (10)   | 12 (10)  |
| Population          | 3 (10)  | 6 (20)  | 13 (43) | 1 (3)    | 23 (19)  |
| <b>Sex</b>          |         |         |         |          |          |
| Females and males   | 29 (97) | 28 (93) | 24 (80) | 30 (100) | 111 (93) |
| Females only        | 1 (3)   | 1 (3)   | 4 (13)  | 0        | 6 (5)    |
| Males only          | 0       | 1 (3)   | 2 (7)   | 0        | 3 (3)    |

CRD: University of York, Centre for Reviews and Dissemination; RR: rapid review; SR: systematic review; WHO: World Health Organisation

<sup>1</sup> Zero means that there were no participants mentioned or included in the review.

# BMJ Open

## Characteristics of stakeholder involvement in systematic and rapid reviews: a methodological review in the area of health services research

|                                 |                                                                                                                                                                                                                                                                                             |
|---------------------------------|---------------------------------------------------------------------------------------------------------------------------------------------------------------------------------------------------------------------------------------------------------------------------------------------|
| Journal:                        | <i>BMJ Open</i>                                                                                                                                                                                                                                                                             |
| Manuscript ID                   | bmjopen-2018-024587.R2                                                                                                                                                                                                                                                                      |
| Article Type:                   | Research                                                                                                                                                                                                                                                                                    |
| Date Submitted by the Author:   | 03-Apr-2019                                                                                                                                                                                                                                                                                 |
| Complete List of Authors:       | Feldmann, Jonas; University of Zurich, Institute of Epidemiology, Biostatistics and Prevention<br>Puhan, Milo; University of Zurich, Institute of Epidemiology, Biostatistics & Prevention<br>Mütsch, Margot; University of Zurich, Institute of Epidemiology, Biostatistics and Prevention |
| <b>Primary Subject Heading</b>: | Research methods                                                                                                                                                                                                                                                                            |
| Secondary Subject Heading:      | Health services research                                                                                                                                                                                                                                                                    |
| Keywords:                       | stakeholder, systematic review, rapid review, evidence                                                                                                                                                                                                                                      |
|                                 |                                                                                                                                                                                                                                                                                             |

SCHOLARONE™  
Manuscripts

1  
2  
3  
4 **Characteristics of stakeholder involvement in systematic and rapid**  
5 **reviews:**  
6  
7  
8 **a methodological review in the area of health services research**  
9  
10  
11  
12  
13  
14

15 **Jonas Feldmann, Milo A. Puhan, Margot Mutsch\***  
16  
17  
18  
19

20 For all authors: Department of Epidemiology, Epidemiology, Biostatistics and Prevention  
21 Institute (EBPI), University of Zurich, Zurich, Switzerland  
22  
23  
24  
25  
26  
27  
28  
29

30 \* Corresponding author: Margot Mutsch, Department of Epidemiology, Epidemiology,  
31 Biostatistics and Prevention Institute (EBPI), University of Zurich, Hirschengraben 84, 8001  
32 Zurich, Switzerland. Phone: +41 44 634 4857; Email: [margot.muetsch@uzh.ch](mailto:margot.muetsch@uzh.ch).  
33  
34  
35  
36  
37  
38  
39  
40  
41  
42  
43  
44  
45  
46  
47  
48  
49  
50  
51  
52  
53  
54  
55  
56  
57  
58  
59  
60



## ABSTRACT

**Objective** Engaging stakeholders in reviews is considered to generate more relevant evidence and to facilitate its dissemination and use. As little is known about stakeholder involvement, we assessed the extent and characteristics of their engagement in systematic and rapid reviews. Stakeholders were defined as people with a particular interest in the research topic.

**Design** Methodological review

**Search strategy** Four databases (Medline, Embase, Cochrane database of systematic reviews, databases of the University of York, Center for Reviews and Dissemination (CRD)) were searched based on an a priori protocol. Four types of reviews (Cochrane and non-Cochrane systematic reviews, rapid and CRD rapid reviews) were retrieved between January, 2011 and October, 2015, pooled by potential review type and duplicates excluded. Articles of each potential review type were randomly ordered and screened for inclusion and exclusion criteria until 30 reviews per group were reached. Their methodological quality was assessed using AMSTAR and characteristics of stakeholder involvement were collected.

**Results** A total of 57,822 deduplicated citations were detected with potential non-Cochrane systematic reviews being the biggest group (56,986 records). We found stakeholder involvement in 13% (4/30) of Cochrane, 20% (6/30) of non-Cochrane systematic reviews, 40% (13/30) of rapid reviews and 93% (28/30) of CRD rapid reviews. Overall, 33% (17/51) of the responding contact authors mentioned, but did not specify, positive effects of stakeholder involvement. A conflict of interest statement remained unmentioned in 40% (12/30) of non-Cochrane systematic reviews and in 27% (8/30) of rapid reviews, but not in Cochrane or CRD reviews.

**Conclusion** Stakeholder engagement was not general practice in either review type (except for CRD rapid reviews), although it was more common in rapid reviews. Especially for non-Cochrane systematic reviews, there is a potential to improve reporting, such as including an a priori study protocol, or to engage stakeholders.

1  
2  
3  
4  
5 **Keywords:** stakeholder, systematic review, rapid review, evidence  
6  
7  
8  
9  
10

11 **STRENGTHS AND LIMITATIONS OF THIS STUDY**  
12

- 13
- 14 • A systematic approach to assess stakeholder engagement in systematic and rapid  
15 reviews was used to fill the gap and to provide an overview of the current situation.  
16
  - 17 • The different review types were able to inform on stakeholder involvement and pointed  
18 to potential improvements.  
19
  - 20 • With the scope of this study being restricted to health services research we intended to  
21 focus on a best-case approach where the context is considered most important and  
22 therefore, stakeholder involvement might be most regularly, but the overall findings  
23 might not be applicable beyond this domain.  
24
  - 25 • The majority of studies were from higher-income countries limiting the generalizability  
26 beyond this setting.  
27
  - 28 • The perception and the reporting of stakeholder involvement might be influenced by the  
29 lack of a uniform definition of stakeholders and depend on the criteria used.  
30  
31  
32  
33  
34  
35  
36  
37  
38  
39  
40  
41  
42  
43  
44  
45  
46  
47  
48  
49  
50  
51  
52  
53  
54  
55  
56  
57  
58  
59  
60

## INTRODUCTION

Evidence synthesis remains a rapidly growing field. There are different methodological approaches and formats depending on the research question and the intended use of the review, such as scoping, systematic or rapid reviews as well as realist syntheses, policy briefs and health technology assessments. We will focus on full systematic reviews as a well-established review type in healthcare and on rapid reviews as an emerging one. A traditional full systematic review is a review that “attempts to collate all empirical evidence and that fits pre-specified eligibility criteria in order to answer a specific, usually narrow research question or intervention”. [1] Within systematic reviews, Cochrane full systematic reviews were established as “gold standard” in knowledge synthesis. A couple of studies compared Cochrane and non-Cochrane systematic reviews and found that the reporting of Cochrane systematic reviews was the most complete one [2], that they were less prone to bias due to greater transparency in reporting as well as due to the quality criteria used, such as the risk of bias assessment [3]. Furthermore, Hopewell et al. described that the inclusion of grey literature routinely performed in Cochrane systematic reviews limited publication bias and provided more conservative treatment effects compared to non-Cochrane systematic reviews without including grey literature. [4]

Rapid reviews are characterized by a less complex research question and aim to synthesize evidence within a shorter time period, with time frames ranging from one week to nine months. [5, 6] They might, therefore, be prone to be of lower validity as a consequence of accelerating and streamlining the review process. [5] However, in response to an increasing demand from stakeholders, rapid reviews are being performed more frequently than before. [6] Only few formal definitions of different rapid reviews exist and few studies have examined their methodology. [7] To cover the variety of rapid reviews we included rapid reviews listed in medical databases as well as other rapid reviews from the databases of the University of York, Center for Reviews and Dissemination ([www.crd.york.ac.uk/CRDWeb](http://www.crd.york.ac.uk/CRDWeb)), such as the Dare

1  
2  
3 reviews (Database of Abstracts of Reviews of Effects) or health technology assessments (CRD  
4 rapid reviews). Rapid reviews target specific audiences including government policymakers,  
5 health care institutions, health professionals and patient associations and research questions  
6 are often tailored to these stakeholders .[8, 9]  
7  
8  
9  
10

11  
12  
13 Stakeholder as a very broad term may include anyone affected by an issue and/or anyone  
14 who can provide input on the topic.[10, 11] Hence, not only decision makers, health  
15 professionals and their organisations are targeted, but also citizen or patients, other researchers  
16 and the media. Involving stakeholders in health services research might be possible at all  
17 stages of systematic or rapid reviews and this is often referred to as coproduction. Thus,  
18 stakeholder engagement aims participatory research and might direct the research question,  
19 define the scope and context of the review as well as contribute to the literature search, the  
20 evidence synthesis and interpretation and might facilitate dissemination and use. Therefore, it  
21 enhances the relevance of findings for policy and practice and contributes to the sustainability of  
22 health systems.[12-14] We especially focused on stakeholder involvement among health  
23 services research. This embraced the multidisciplinary field of scientific studies regarding social,  
24 financing and personal factors, organizational structures and processes, health technologies,  
25 and how these factors affect access to, the quality and cost of health care, and ultimately, our  
26 health and well-being".[15] Here, we considered the context of conducted studies and  
27 dissemination issues as most important, and we expected health services research to be the  
28 research field where stakeholders were involved most regularly.  
29  
30  
31  
32  
33  
34  
35  
36  
37  
38  
39  
40  
41  
42  
43  
44  
45  
46  
47  
48  
49  
50

## 51 **Study aim**

52 To date, little is known about the extent of stakeholder engagement in systematic and  
53 rapid reviews and there have been few efforts to directly report the specific effects regarding  
54 their involvement. We consider this information to be relevant for integrated knowledge  
55 translation, the dissemination and acceptance of systematic and rapid reviews in policy and  
56  
57  
58  
59  
60

1  
2  
3 practice. We focused on systematic and rapid reviews as they represent different types of  
4 evidence synthesis and are well-established in research and practice. In addition, reviews  
5 needed to belong to the area of health services research as an established field for systematic  
6 and rapid reviews as well as a best-case sample with a considerable extent of stakeholder  
7 involvement. We aimed to assess the extent and characteristics of stakeholder engagement in  
8 published systematic and rapid reviews and to specifically determine reporting characteristics.  
9  
10  
11  
12  
13  
14  
15  
16  
17

## 18 **METHODS**

### 19 **Study design**

20  
21  
22 Based on the pre-specified protocol this methodological review was performed to assess  
23 characteristics and reporting of stakeholder engagement in random samples of systematic and  
24 rapid reviews in the field of health services research (Supplementary File S1). A total of four  
25 types of reviews, two groups of each, systematic and rapid reviews, were assessed as they  
26 were considered to exhibit potentially differences in stakeholder involvement. This included  
27 Cochrane systematic reviews, non-Cochrane systematic reviews, rapid reviews and rapid  
28 reviews of the databases of the University of York, Center for Reviews and Dissemination (CRD  
29 rapid reviews). For the reporting of this study the PRISMA checklist was used (Supplementary  
30 File S2).  
31  
32  
33  
34  
35  
36  
37  
38  
39  
40  
41  
42  
43  
44

### 45 **Search strategy and screening**

46 For systematic reviews, we searched the Cochrane database of systematic reviews for  
47 articles including the term “systematic review” in their title or abstract (Cochrane systematic  
48 reviews) and EBSCO Medline and Embase with excluding the term “Cochrane” in title or  
49 abstract (non-Cochrane systematic reviews). Rapid reviews were searched in EBSCO Medline  
50 and Embase and in the databases of the University of York, Center for Reviews and  
51 Dissemination ([www.crd.york.ac.uk/CRDWeb](http://www.crd.york.ac.uk/CRDWeb)) (CRD rapid reviews). Sample search strategies  
52 are depicted in Supplementary Files S3a and S3b. We included studies published between  
53  
54  
55  
56  
57  
58  
59  
60

1  
2  
3 January, 2011 and December, 2015 without language restriction. Our search was completed on  
4  
5 October 22<sup>nd</sup>, 2015 and therefore, the search results for 2015 did not cover the whole year. All  
6  
7 results were pooled by review type and duplicates were excluded based on authors, journal and  
8  
9 publication year. For each of the four lists of potential study types, each reference was given a  
10  
11 unique random number using the `sample()` function available in R [16]. Each list was then  
12  
13 sorted by the random number, and the articles were screened in order for inclusion and  
14  
15 exclusion criteria by two reviewers until a total of 30 studies were reached per group (JF and  
16  
17 MM tested their consistency in assessing the inclusion and exclusion criteria for about ten  
18  
19 different studies and MM checked the assignment for about half of the study sample). Full text  
20  
21 screening was performed to ensure the decision. One review author (JF) performed data  
22  
23 extraction, supervised and spot-checked by a second researcher (MM). Disagreements were  
24  
25 resolved by consensus.  
26  
27  
28  
29

### 30 **Sample size and selection of review groups**

31  
32 As rapid reviews were often targeted to specific audiences [8, 9], they were expected to  
33  
34 involve stakeholders to a greater extent. We estimated a proportion of stakeholder involvement  
35  
36 of 0.70 for rapid reviews and of 0.25 for systematic reviews, which resulted in a minimal  
37  
38 expected difference of 0.45. For a two group-comparison, rapid and systematic reviews, with  
39  
40  $n=25$  per group there will be an estimated power of 0.88 and an alpha of 0.023. To account for  
41  
42 a potential subgroup analysis, we included a sample of  $n=30$  reviews per group, with four  
43  
44 review groups (Cochrane and non-Cochrane systematic reviews, rapid and CRD rapid reviews).  
45  
46 This resulted in an overall sample of 120 studies.  
47  
48  
49

### 50 **Inclusion and exclusion criteria**

51  
52 We included reviews targeting health services research as defined by Lohr [15]: "Health  
53  
54 services research is the multidisciplinary field of scientific investigation that studies how social  
55  
56 factors, financing systems, organizational structures and processes, health technologies, and  
57  
58 personal behaviors affect access to health care, the quality and cost of health care, and  
59  
60

1  
2  
3 ultimately, our health and well-being. Its research domains are individuals, families,  
4 organizations, institutions, communities, and populations.” Therefore, we included Health  
5 Technology Assessments (e.g. rapid reviews as part of HTAs) targeting effectiveness as well as  
6 meta-analyses and systematic reviews for effectiveness and utility, reviews of pharmaceutical  
7 trials under everyday conditions, reviews of basic research in care-related fields, reviews of  
8 quality research or of methodological developments in the field of health services research,  
9 reviews about the development and application of new technologies (ehealth) and the  
10 implementation of knowledge into clinical practice. We excluded reviews that focused  
11 exclusively on economic or cost analyses, performed a narrative review, an overview of reviews  
12 or a protocol of a systematic review in order not to mix so different methodological approaches.  
13 The following study types were also excluded: Reviews of efficacy studies without assessing the  
14 quality of life, reviews including clinical efficacy trials phase I to III, epidemiological reviews to  
15 assess determinants or risk factors, non-human studies, establishment of databases or  
16 registries, reviews with unclear design or description of the intervention.  
17  
18  
19  
20  
21  
22  
23  
24  
25  
26  
27  
28  
29  
30  
31  
32  
33  
34

### 35 **Data extraction**

36 Stakeholders were defined as people with a particular interest in the research topic (but  
37 were not members of the primary research team).[10, 17] We evaluated any kind of stakeholder  
38 involvement and recorded different groups of stakeholders: Institutional health care providers,  
39 representatives of hospitals or community services, patients/consumers, participants of  
40 government agencies and health care policymakers at Federal, State and local levels,  
41 associations of health professionals and researchers (if not members of the primary study  
42 team). If available, we identified their fields and stages of involvement as well as their  
43 contribution to the study. This included all review steps, such as formulating the research  
44 question(s), determining study characteristics, contributing to the writing of the protocol,  
45 participating within the review process with searching, screening, data extraction, synthesizing,  
46 interpreting the study results and/or establishing recommendations. In addition, we extracted  
47 the following data: institution where the review was performed, contact details of the  
48  
49  
50  
51  
52  
53  
54  
55  
56  
57  
58  
59  
60



1  
2  
3 corresponding author, the type of intervention, study setting, characteristics of the population  
4 (sample size, age range, sex), funding, declared conflict of interest, year of publication. The  
5 methodological quality of included articles was assessed using the AMSTAR tool, a  
6 measurement tool for the assessment of the methodological quality of systematic reviews.[18]  
7  
8 Where available, our rating was compared with an already existing one from the “health  
9 evidence” or “health systems evidence” platforms.[19, 20] Both quality ratings were then  
10 categorized as strong ( $\geq 8$ ), moderate (4-7) or weak ( $< 4$ ). In the absence of a quality assessment  
11 tool for rapid reviews, we used AMSTAR also for rapid reviews, being aware that this might  
12 result in lower rating scores due to abbreviated procedures. In addition, the use of the PRISMA  
13 checklist was recorded when mentioned in the articles.[21] AMSTAR ratings are presented as  
14 Supplementary file S4, study characteristics as Supplementary file S5.

15  
16 To ascertain stakeholder engagement as well as to assess the extent or stages of their  
17 involvement, pre-formulated questions were sent by email to the contact authors of the included  
18 articles. We asked them, if there had been any stakeholder involvement (yes or no) and if so, to  
19 specify the number of stakeholders, the stages of involvement and their self-assessed  
20 estimation of the effect of stakeholder engagement on the review outcome. In case of missing  
21 responses, one reminder was sent.

22  
23  
24  
25  
26  
27  
28  
29  
30  
31  
32  
33  
34  
35  
36  
37  
38  
39  
40  
41 **Patient and Public involvement** None involved.

## 42 43 44 45 46 **RESULTS**

47  
48 Our search identified 57,822 citations remaining after exclusion of duplicates. Although,  
49 not all of these records will fulfil the inclusion criteria, such as e.g. being designed as a  
50 systematic review, we assigned them as potential review group. For the screening step, the  
51 counts of the articles that needed to be screened to reach the final set of studies are depicted in  
52 Figure 1.[22-141] The excluded studies are presented in Supplementary Table S1.

[insert Figure 1 here]

**Table 1**

**Characteristics of included reviews by review type**

|                                                                             | <b>Cochrane SR (%)</b> | <b>Non-Cochrane SR (%)</b> | <b>RR (%)</b> | <b>CRD RR (%)</b> | <b>Total (%)</b> |
|-----------------------------------------------------------------------------|------------------------|----------------------------|---------------|-------------------|------------------|
| <b>Random sample (% of total per group)</b>                                 | 30 (6)                 | 30 (0.1)                   | 30 (14)       | 30 (32)           | 120 (0.2)        |
| <b>Geographic location of the corresponding author (% of random sample)</b> |                        |                            |               |                   |                  |
| Africa                                                                      | 2 (7)                  | 0                          | 0             | 0                 | 2 (2)            |
| Asia                                                                        | 5 (17)                 | 3 (10)                     | 1 (3)         | 0                 | 9 (8)            |
| Australia                                                                   | 3 (10)                 | 5 (17)                     | 2 (7)         | 0                 | 10 (8)           |
| Europe                                                                      | 11 (37)                | 13 (43)                    | 13 (43)       | 2 (7)             | 39 (33)          |
| North America                                                               | 7 (23)                 | 8 (27)                     | 14 (47)       | 28 (93)           | 57 (48)          |
| South America                                                               | 2 (7)                  | 1 (3)                      | 0             | 0                 | 3 (3)            |
| <b>Thematic focus</b>                                                       |                        |                            |               |                   |                  |
| Prevention                                                                  | 11 (37)                | 5 (17)                     | 4 (13)        | 7 (23)            | 27 (23)          |
| Treatment                                                                   | 18 (60)                | 14 (47)                    | 15 (50)       | 16 (53)           | 63 (53)          |
| Health system                                                               | 1 (3)                  | 2 (7)                      | 7 (23)        | 7 (23)            | 17 (14)          |
| Community-based <sup>1</sup>                                                | 0                      | 9 (30)                     | 4 (13)        | 0                 | 13 (11)          |
| <b>Funding</b>                                                              |                        |                            |               |                   |                  |
| Governmental, institutional or WHO                                          | 30 (100)               | 30 (100)                   | 30 (100)      | 30 (100)          | 120 (100)        |
| Additional funding by                                                       | 0                      | 0                          | 1 (3)         | 0                 | 1 (1)            |

|                                   |            |           |           |           |           |
|-----------------------------------|------------|-----------|-----------|-----------|-----------|
| company                           |            |           |           |           |           |
| <b>Conflict of interest (COI)</b> |            |           |           |           |           |
| Declared none                     | 21 (70)    | 15 (50)   | 19 (63)   | 29 (97)   | 84 (70)   |
| COI declared                      | 9 (30)     | 3 (10)    | 3 (10)    | 0         | 15 (13)   |
| Unmentioned                       | 0          | 12 (40)   | 8 (27)    | 1 (3)     | 21 (18)   |
| <b>Study protocol</b>             |            |           |           |           |           |
| Yes, mentioned in article         | 30 (100)   | 5 (17)    | 4 (13)    | 1 (3)     | 40 (33)   |
| Yes, mentioned in correspondence  | 0          | 8 (27)    | 9 (30)    | 0         | 17 (14)   |
| No, confirmed by correspondence   | 0          | 2 (7)     | 4 (13)    | 0         | 6 (5)     |
| Unmentioned                       | 0          | 15 (50)   | 13 (43)   | 29 (97)   | 57 (48)   |
| <b>AMSTAR rating</b>              |            |           |           |           |           |
| Median (range)                    | 11 (7, 11) | 7 (3, 11) | 4 (2, 10) | 8 (5, 11) | 8 (2, 11) |

With exclusion of treatment or preventive interventions

AMSTAR: measurement tool for the "assessment of the methodological quality of systematic reviews", not applicable questions were not counted. Higher AMSTAR scores indicate higher quality.

SR: systematic review; RR: rapid review; CRD: databases of the University of York, Center for Reviews and Dissemination; WHO: World Health Organisation.

Table 1 presents the characteristics of the included studies. Cochrane systematic reviews generally focused on the prevention and treatment of specific conditions, whereas 30% of non-Cochrane systematic reviews were categorized with a community-based topic, with a wide range of participants and possible outcomes and a broader range of study settings. Of note, 23% of each, rapid reviews and CRD rapid reviews, were categorized as health system

1  
2  
3 intervention, because they focused on methodological questions or health quality research.  
4  
5 We detected noticeable differences when comparing the median AMSTAR scores: Cochrane  
6  
7 systematic reviews and CRD rapid reviews showed higher median scores than non-Cochrane  
8  
9 systematic reviews and rapid reviews. Where available, we also collected existing AMSTAR  
10  
11 ratings from the “health evidence” or “health systems evidence” platforms. For 68% (13/19 study  
12  
13 ratings) we found a congruent classification as strong, moderate or weak, respectively  
14  
15 (Supplementary File S4). In non-Cochrane reviews information about methodological  
16  
17 specifications of included studies were often lacking. As an example, all 30 Cochrane  
18  
19 systematic reviews (100%) mentioned a pre-existing review protocol, whereas a high amount of  
20  
21 non-Cochrane systematic reviews (59%) and of rapid reviews (43%) did not clarify whether  
22  
23 there had been a protocol or not. Similarly, all 30 Cochrane systematic reviews and all but one  
24  
25 CRD rapid reviews (97%) included a conflict of interest statement, whereas 40% of non-  
26  
27 Cochrane systematic reviews and 27% of rapid reviews lacked such a paragraph. All reviews  
28  
29 were funded by national or international governmental or institutional sources. Only one rapid  
30  
31 review reported the acceptance of additional funding from a pharmaceutical company.  
32  
33 Characteristics of the study population by type of included review are presented in the  
34  
35 Supplementary Table S2.  
36  
37  
38  
39  
40  
41  
42  
43  
44  
45  
46  
47  
48  
49  
50  
51  
52  
53  
54  
55  
56  
57  
58  
59  
60

**Table 2****General characteristics of stakeholder involvement (SI) by review type**

|                                                                          | <b>Cochrane<br/>SR (%)<br/>(n=30)</b> | <b>Non-<br/>Cochrane<br/>SR (%)<br/>(n=30)</b> | <b>RR (%)<br/>(n=30)</b> | <b>CRD RR (%)<br/>(n=30)</b> | <b>Total (%)<br/>(N=120)</b> |
|--------------------------------------------------------------------------|---------------------------------------|------------------------------------------------|--------------------------|------------------------------|------------------------------|
| SI mentioned in article                                                  | 2 (7)                                 | 2 (7)                                          | 6 (20)                   | 28 (93)                      | 38 (32)                      |
| SI only mentioned in<br>correspondence                                   | 2 (7)                                 | 4 (13)                                         | 7 (23)                   | 0                            | 13 (11)                      |
| <b>Total SI</b>                                                          | <b>4 (13)</b>                         | <b>6 (20)</b>                                  | <b>13 (43)</b>           | <b>28 (93)</b>               | <b>51 (43)</b>               |
| <b>SI per year</b>                                                       |                                       |                                                |                          |                              |                              |
| 2011                                                                     | 0/5 (0)                               | 0/1 (0)                                        | 0/3 (0)                  | 0/0 (0)                      | 0/9 (0)                      |
| 2012                                                                     | 3/7 (43)                              | 1/5 (20)                                       | 1/3 (33)                 | 0/0 (0)                      | 5/15 (33)                    |
| 2013                                                                     | 0/9 (0)                               | 0/6 (0)                                        | 3/5 (60)                 | 9/10 (90)                    | 12/30 (40)                   |
| 2014                                                                     | 1/7 (14)                              | 3/9 (30)                                       | 6/15 (40)                | 2/3 (67)                     | 12/34 (35)                   |
| 2015                                                                     | 0/2 (0)                               | 2/9 (22)                                       | 3/4 (75)                 | 17/17 (100)                  | 22/32 (69)                   |
| <b>Number of stakeholders<br/>involved per review (%<br/>of SI)</b>      |                                       |                                                |                          |                              |                              |
| 1                                                                        | 2 (50)                                | 2 (33)                                         | 2 (15)                   | 0                            | 6 (12)                       |
| 2-4                                                                      | 1 (25)                                | 1 (17)                                         | 4 (31)                   | 2 (7)                        | 8 (16)                       |
| >4                                                                       | 1 (25)                                | 3 (50)                                         | 4 (31)                   | 26 (93)                      | 34 (67)                      |
| Unspecified                                                              | 0                                     | 0                                              | 3 (23)                   | 0                            | 3 (6)                        |
| <b>Types of stakeholders<br/>(multiple roles possible)<br/>(% of SI)</b> |                                       |                                                |                          |                              |                              |
| Patients/consumers                                                       | 2 (50)                                | 0                                              | 2 (15)                   | 5 (18)                       | 9 (18)                       |

|                                                     |           |           |           |             |            |
|-----------------------------------------------------|-----------|-----------|-----------|-------------|------------|
| Professional organisations                          | 1 (25)    | 0         | 0         | 5 (18)      | 6 (12)     |
| Caregivers                                          | 2 (50)    | 0         | 3 (23)    | 23 (82)     | 28 (55)    |
| Researchers                                         | 1 (25)    | 3 (50)    | 2 (15)    | 0           | 6 (12)     |
| Policymakers                                        | 0         | 3 (50)    | 4 (31)    | 3 (11)      | 10 (20)    |
| Unspecified                                         | 0         | 0         | 2 (15)    | 4 (14)      | 6 (12)     |
| <b>Funding source (% of SI)</b>                     |           |           |           |             |            |
| Governmental or institutional funding               | 4 (100)   | 6 (100)   | 13 (100)  | 28 (100)    | 51 (100)   |
| Funding source involved as stakeholder              | 0         | 1 (17)    | 2 (15)    | 0           | 3 (6)      |
| <b>Thematic focus (% per review type per topic)</b> |           |           |           |             |            |
| Prevention                                          | 0/11 (0)  | 0/5 (0)   | 1/4 (25)  | 6/7 (86)    | 7/27 (26)  |
| Treatment                                           | 4/18 (22) | 3/14 (21) | 6/15 (40) | 16/16 (100) | 29/63 (46) |
| Health system                                       | 0/1 (0)   | 1/2 (50)  | 5/7 (71)  | 6/7 (86)    | 12/17 (71) |
| Community-based                                     | 0/0 (0)   | 2/9 (22)  | 1/4 (25)  | 0/0 (0)     | 3/13 (23)  |

CRD: databases of the University of York, Center for Reviews and Dissemination; SR:

systematic review; RR: rapid review; SI: stakeholder involvement

Any stakeholder involvement was mentioned in 13% of Cochrane systematic reviews, 20% of non-Cochrane systematic reviews, 43% of rapid reviews and 93% of CRD rapid reviews. Except for CRD rapid reviews, where the involvement of stakeholders was routinely reported in the methods or appendix section, about half of the stakeholder involvement was reported in the articles and the other half was confirmed via email by contact authors and remained unmentioned in the reviews. With 67% the email response rate was highest for rapid reviews. When comparing the amount of stakeholder involvement in different review topics, there were notable differences: The proportion of stakeholder involvement in reviews focusing on

prevention or treatment of specific conditions was lower than in those targeting health system interventions. Interestingly, the proportion of stakeholder involvement has been quite constant between the years 2012 (5/15, 33%) and 2014 (12/34, 34%) even though the amount of rapid reviews has increased substantially (Table 2). There was, however, a remarkable increase in the proportion of stakeholder involvement for the year 2015 (22/32, 69%), but this was mostly due to the fact that a majority of CRD rapid reviews, which presented the highest proportion of stakeholder involvement, was indexed in 2015.

CRD rapid reviews turned out to have by far the highest proportion of reported stakeholder involvement. The types of stakeholders engaged were listed in the appendix of 26/30 articles, but it was not specified what they had specifically contributed to the review, e.g. if their contribution had affected the final results and conclusions of the reviews (Table 3). One author mentioned in the review that the reason for involving stakeholders was to understand the clinical perspective.

**Table 3**

**Engagement characteristics of stakeholder involvement (SI) by review type**

|                                                          | <b>Cochrane<br/>SR (%)<br/>(n=30)</b> | <b>Non-<br/>Cochrane<br/>SR (%)<br/>(n=30)</b> | <b>RR (%)<br/>(n=30)</b> | <b>CRD RR (%)<br/>(n=30)</b> | <b>Total (%)<br/>(N=120)</b> |
|----------------------------------------------------------|---------------------------------------|------------------------------------------------|--------------------------|------------------------------|------------------------------|
| <b>Stages of SI (multiple stages possible) (% of SI)</b> |                                       |                                                |                          |                              |                              |
| Research question                                        | 1 (25)                                | 1 (17)                                         | 4 (31)                   | 0                            | 6 (12)                       |
| Study characteristics                                    | 0                                     | 0                                              | 6 (46)                   | 0                            | 6 (12)                       |
| Protocol writing                                         | 0                                     | 1 (17)                                         | 2 (15)                   | 0                            | 3 (6)                        |



|                                                                                     |        |        |         |          |         |
|-------------------------------------------------------------------------------------|--------|--------|---------|----------|---------|
| Review process                                                                      | 3 (75) | 1 (17) | 5 (38)  | 0        | 9 (18)  |
| Interpretation of findings                                                          | 0      | 1 (17) | 1 (8)   | 0        | 2 (4)   |
| Result synthesis                                                                    | 0      | 0      | 2 (15)  | 0        | 2 (4)   |
| Multiple or all stages                                                              | 1 (25) | 2 (33) | 1 (8)   | 28 (100) | 32 (63) |
| Unspecified                                                                         | 0      | 2 (33) | 1 (8)   | 0        | 3 (6)   |
| <b>Reasons mentioned for SI (% of SI)</b>                                           |        |        |         |          |         |
| Stakeholder commissioned / requested review                                         | 0      | 1 (17) | 4 (31)  | 0        | 5 (10)  |
| To get consumer feedback                                                            | 1 (25) | 0      | 0       | 0        | 1 (2)   |
| To refine research question                                                         | 1 (25) | 0      | 0       | 0        | 1 (2)   |
| To make the review more relevant for target audience                                | 2 (50) | 0      | 8 (62)  | 0        | 10 (20) |
| To understand clinical perspective                                                  | 0      | 1 (17) | 0       | 1 (4)    | 2 (4)   |
| Unspecified                                                                         | 0      | 4 (67) | 1 (7)   | 27 (96)  | 32 (63) |
| <b>Effect of SI mentioned by authors (% of SI)</b>                                  |        |        |         |          |         |
| Substantial or positive effect                                                      | 2 (50) | 4 (67) | 11 (85) | 0        | 17 (33) |
| Negative effect                                                                     | 0      | 0      | 0       | 0        | 0       |
| No effect mentioned                                                                 | 2 (50) | 2 (33) | 2 (15)  | 28 (100) | 34 (67) |
| Explicit encouragement for involving stakeholders in further studies (% of reviews) | 0      | 1 (3)  | 1 (3)   | 1 (3)    | 3 (2)   |

CRD: databases of the University of York, Center for Reviews and Dissemination; SR:

systematic review; RR: rapid review; SI: stakeholder involvement

1  
2  
3  
4  
5 We detected stakeholder involvement in 43% (13/30) of rapid reviews. In contrast to  
6  
7 CRD rapid reviews, there was usually a small number of stakeholders engaged. They were  
8  
9 involved at different phases, such as determining study characteristics, formulating the research  
10  
11 question, within the review process in general, and less commonly in protocol writing, result  
12  
13 synthesis and the interpretation of findings. One article involved stakeholder throughout all  
14  
15 stages, in one case the phase of involvement was not specified. In total, 85% of the authors  
16  
17 confirmed, that the stakeholders had significantly contributed to the review. Of these, 62%  
18  
19 mentioned that involving stakeholders led to an increased impact of the review and enabled to  
20  
21 focus on the needs of target groups, which made the review more relevant to e.g. patients or  
22  
23 policymakers. Stakeholders had commissioned one third of the rapid reviews or had asked for  
24  
25 evidence. Only two of 13 authors (15%) did not mention any substantial effect. In two cases one  
26  
27 of the funding sources was involved as stakeholder.  
28  
29  
30  
31

32 We identified stakeholder involvement in 20% (6/30) of non-Cochrane systematic  
33  
34 reviews. In four cases the stakeholder involvement was confirmed via email, two articles  
35  
36 mentioned the involvement of stakeholders. Only two types of stakeholders were reported:  
37  
38 policymakers and researchers. If mentioned, all phases of involvement occurred about equally.  
39  
40 A total 67% (4/6) study authors reported significant benefit from the stakeholders' contributions.  
41  
42 One author mentioned that stakeholder supported the researchers to understand different  
43  
44 perspectives of the problem, and 33% (2/6) reported no effect. In one case, the stakeholder was  
45  
46 involved as funding source.  
47  
48  
49  
50  
51

52 Cochrane systematic reviews turned out to be the group with the smallest amount of  
53  
54 stakeholder involvement. All stakeholder engagement was confirmed and specified by email.  
55  
56 The types of stakeholders engaged were patients, caregivers, professional organisations and  
57  
58 researchers. They were mostly involved for providing feedback during the review process, in  
59  
60 one case they contributed in formulating the review question. One review involved stakeholders

1  
2  
3 at all stages. A total of 50% (2/4) of the authors reported substantial benefit, the other 50% (2/4)  
4 reported no significant effect on study results or conclusions. Two authors had involved  
5 stakeholders to make the review more relevant for its target audience, one author claimed that  
6 stakeholders helped him to refine the research question. One author involved stakeholders to  
7 get direct consumer feedback before publishing the review. No stakeholders were involved in  
8 funding.  
9  
10  
11  
12  
13  
14  
15  
16  
17

## 18 **DISCUSSION**

19  
20 The involvement of stakeholders varies by review type. Our findings suggest that rapid  
21 reviews tend to involve stakeholders more than twice as frequently than systematic reviews. On  
22 average, they also involved a greater number of stakeholders per review. In addition, we  
23 detected considerable differences in the phases in which stakeholders were involved. Rapid  
24 reviews involved them at very early stages of the review process, such as determining the  
25 intentional study characteristics or formulating the research question. Furthermore, it seemed to  
26 be much more common for policymakers, who were the most frequent group of stakeholders  
27 involved in rapid reviews, or other stakeholder groups, to substantially contribute to rapid  
28 reviews than to systematic reviews.  
29  
30  
31  
32  
33  
34  
35  
36  
37  
38

39 Of note, the majority of rapid and non-Cochrane systematic review authors reported that  
40 the involved stakeholders had positive and considerable effects on the study results, making the  
41 review more relevant for the targeted audience. However, the minority of rapid and non-  
42 Cochrane systematic review authors reporting no effect of stakeholder involvement on the  
43 review process, may illustrate that the stakeholders' contribution to non-Cochrane systematic  
44 reviews was seen as an additional and welcomed feature to the review, but not as a substantial  
45 part. This shows the importance that within and between review types an information and  
46 experiences exchange between researchers could benefit the stakeholder engagement.  
47  
48  
49  
50  
51  
52  
53  
54  
55  
56  
57

58 A strength of this study is to provide an overview with its rather low amount of  
59  
60

1  
2  
3 stakeholder engagement in the assessed review types despite known benefits regarding the  
4 use of evidence in policy and practice. With respect to the different procedures used by review  
5 types, the reported experiences of stakeholder engagement, e.g. in rapid reviews, could further  
6 benefit and facilitate stakeholder engagement in other review types, for example in systematic  
7 reviews.  
8  
9  
10  
11  
12

13 One limitation of this study is the low response rate to our emails by contact authors.  
14 Given the fact that nearly half of our emails to study authors remained unanswered or could not  
15 be sent, the rate of unmentioned stakeholder involvement might still be higher than our numbers  
16 suggest. Of note, there was no considerable difference between systematic reviews and rapid  
17 reviews in the percentage of unmentioned stakeholder involvement.  
18  
19  
20  
21  
22  
23

24 Although when using a broad definition of the term “stakeholder” including everyone with  
25 a particular interest in the research topic (but who are not members of the primary research  
26 team), this term was not consistently used by contact authors. In their emails, some authors  
27 listed peer reviewers as stakeholders or one author erroneously mentioned members of the  
28 research team, who performed literature research and data extraction as stakeholders. In  
29 addition, interdisciplinary knowledge exchange is an important part of evidence-based research,  
30 but there is a difference whether experts from other fields were included as researchers in the  
31 study team or whether they were considered as stakeholders. We did not count any experts or  
32 peer reviewers as stakeholders, Furthermore, discussion is needed, whether the funding body  
33 of a review might contribute as a stakeholder and how a potentially associated conflict of  
34 interest could be avoided.  
35  
36  
37  
38  
39  
40  
41  
42  
43  
44  
45  
46  
47  
48  
49

50 The reported involvement of stakeholders corresponded with Cottrell et al. who  
51 mentioned that stakeholders might contribute to different study types and evidence  
52 phases.[142] Based upon, Keown et al.[143] concluded, that stakeholder involvement led to an  
53 increased relevance and depth of review findings, more clarity in defining research questions,  
54 broader dissemination of their results and increased awareness of target groups. Although they  
55 mentioned that this engagement process required flexibility and might be resource- and time-  
56  
57  
58  
59  
60

1  
2  
3 intensive, they nevertheless concluded that involving stakeholders facilitated implementation  
4  
5 and should be indispensable for future research.  
6  
7  
8

9  
10 Although the overall proportion of stakeholder involvement has not yet increased  
11 prominently in the past few years, there have still been considerable efforts in creating  
12 standardized procedures for involving stakeholders in evidence synthesis. Keown et al.  
13  
14 identified five opportunities in the systematic review process, where potential stakeholders could  
15  
16 be engaged on a regular base.[143] The CRD rapid reviews included were mainly performed by  
17  
18 Health Quality Ontario (Canada) and routinely held expert panels, including physicians,  
19  
20 caregivers and sometimes, consumer representatives and professional organisations. The fact  
21  
22 that they included stakeholders on a regular basis might confirm, what Keown et al [143] had  
23  
24 already suggested: the engagement of audience members interested in or affected by the  
25  
26 investigated topic definitively resulted in more benefits than limitations. We, therefore, suggest  
27  
28 that future researcher involve stakeholders more broadly in the process of evidence synthesis,  
29  
30 to increase the relevance and acceptance of the knowledge transfer. One example of an  
31  
32 organisation ensuring that stakeholders are involved in research is the James Lind Alliance  
33  
34 (<http://www.jla.nihr.ac.uk>).  
35  
36  
37  
38

39 In future, the reporting of stakeholder involvement should be improved and its effects  
40  
41 better evaluated and communicated. Stakeholder engagement could also be included in  
42  
43 reporting checklists of all review types.  
44  
45  
46  
47  
48

## 49 **ACKNOWLEDGEMENT**

50  
51 We are indebted to Julia Kreis and Aline Flatz for reviewing the protocol and our thanks go to  
52  
53 Sarah Haile for generating the random lists. Parts of this work have been presented at the  
54  
55 Global Evidence Summit September 2017 in Cape Town, SA.  
56  
57  
58  
59

60 **Contributors** All authors conceived and designed the study. JF collected and interpreted the

1  
2  
3 data and essentially contributed to the writing of the manuscript. MP and MM supervised the  
4 overall research and critically revised the manuscript. All authors approved the final manuscript.  
5  
6

7 **Funding** This research received no specific grant from any funding agency in the public,  
8 commercial or not-for-profit sectors.  
9

10  
11 **Competing interests** None declared.  
12

13 **Patient consent** Not required.  
14

15 **Provenance and peer review** Not commissioned; externally peer reviewed.  
16

17 **Data sharing statement** No additional data are available.  
18  
19  
20  
21  
22  
23

## 24 **Legend Figure 1**

### 25 **Flow diagram of study selection.**

26  
27  
28 CRD: Databases of the University of York, Center for Reviews and Dissemination; RR: rapid  
29 review; SR: systematic review  
30  
31  
32  
33  
34  
35  
36  
37  
38  
39  
40  
41  
42  
43  
44  
45  
46  
47  
48  
49  
50  
51  
52  
53  
54  
55  
56  
57  
58  
59  
60

## REFERENCES

1. Khangura S, Konnyu K, Cushman R, Grimshaw J, Moher D. Evidence summaries: the evolution of a rapid review approach. *Syst Rev.* 2012;1:10. doi: 10.1186/2046-4053-1-10. PubMed PMID: 22587960; PubMed Central PMCID: PMC3351736.
2. Page MJ, Shamseer L, Altman DG, Tetzlaff J, Sampson M, Tricco AC, et al. Epidemiology and Reporting Characteristics of Systematic Reviews of Biomedical Research: A Cross-Sectional Study. *PLoS Med.* 2016;13(5):e1002028. doi: 10.1371/journal.pmed.1002028. PubMed PMID: 27218655; PubMed Central PMCID: PMC4878797.
3. Jadad AR, Cook DJ, Jones A, Klassen TP, Tugwell P, Moher M, et al. Methodology and reports of systematic reviews and meta-analyses - A comparison of COCHRANE reviews with articles published in paper-based journals. *Jama-Journal of the American Medical Association.* 1998;280(3):278-80. doi: DOI 10.1001/jama.280.3.278. PubMed PMID: WOS:000074706000026.
4. Hopewell S, Clarke M, Lefebvre C, Scherer R. Handsearching versus electronic searching to identify reports of randomized trials. *Cochrane Database Syst Rev.* 2007;(2):MR000001. doi: 10.1002/14651858.MR000001.pub2. PubMed PMID: 17443625.
5. Ganann R, Ciliska D, Thomas H. Expediting systematic reviews: methods and implications of rapid reviews. *Implement Sci.* 2010;5:56. doi: 10.1186/1748-5908-5-56. PubMed PMID: 20642853; PubMed Central PMCID: PMC2914085.
6. Watt A, Cameron A, Sturm L, Lathlean T, Babidge W, Blamey S, et al. Rapid versus full systematic reviews: validity in clinical practice? *ANZ J Surg.* 2008;78(11):1037-40. doi: 10.1111/j.1445-2197.2008.04730.x. PubMed PMID: 18959712.
7. Tricco AC, Antony J, Zarin W, Striffler L, Ghassemi M, Ivory J, et al. A scoping review of rapid review methods. *BMC Med.* 2015;13:224. doi: 10.1186/s12916-015-0465-6. PubMed PMID: 26377409; PubMed Central PMCID: PMC4574114.
8. Watt A, Cameron A, Sturm L, Lathlean T, Babidge W, Blamey S, et al. Rapid reviews versus full systematic reviews: an inventory of current methods and practice in health technology assessment. *Int J Technol Assess Health Care.* 2008;24(2):133-9. doi: 10.1017/S0266462308080185. PubMed PMID: 18400114.
9. Hailey DM. Health technology assessment in Canada: diversity and evolution. *Med J Aust.* 2007;187(5):286-8. PubMed PMID: 17767434.
10. Mallery C, Ganachari D, Fernandez J, Smeeding L, Robinson S, Moon M, et al. Innovative Methods in Stakeholder Engagement: An Environmental Scan. Rockville, MD: Agency for Healthcare Research and Quality; May 2012. <http://www.effectivehealthcare.ahrq.gov/index.cfm/tools-and-resources/how-to-get-involved-in-the-effective-health-care-program/>: 2012.
11. Concannon TW, Fuster M, Saunders T, Patel K, Wong JB, Leslie LK, et al. A systematic review of stakeholder engagement in comparative effectiveness and patient-centered outcomes research. *J Gen Intern Med.* 2014;29(12):1692-701. doi: 10.1007/s11606-014-2878-x. PubMed PMID: 24893581; PubMed Central PMCID: PMC4242886.
12. Boote J, Wong R, Booth A. 'Talking the talk or walking the walk?' A bibliometric review of the literature on public involvement in health research published between 1995 and 2009. *Health Expect.* 2015;18(1):44-57. doi: 10.1111/hex.12007. PubMed PMID: 23033933; PubMed Central PMCID: PMC45060762.
13. Kreis J, Puhan MA, Schunemann HJ, Dickersin K. Consumer involvement in systematic reviews of comparative effectiveness research. *Health Expect.* 2013;16(4):323-37. doi:



- 10.1111/j.1369-7625.2011.00722.x. PubMed PMID: 22390732; PubMed Central PMCID: PMC5060681.
14. Morley RF, Norman G, Golder S, Griffith P. A systematic scoping review of the evidence for consumer involvement in organisations undertaking systematic reviews: focus on Cochrane. *Res Involv Engagem*. 2016;2:36. doi: 10.1186/s40900-016-0049-4. PubMed PMID: 29507770; PubMed Central PMCID: PMC5831869.
  15. Lohr KN, Steinwachs DM. Health services research: an evolving definition of the field. *Health Serv Res*. 2002;37(1):7-9. PubMed PMID: 11949927.
  16. R Core Team. R: A language and environment for statistical computing. Vienna, Austria. URL <https://www.R-project.org/2018>.
  17. Pollock A, Campbell P, Struthers C, Synnot A, Nunn J, Hill S, et al. Stakeholder involvement in systematic reviews: a protocol for a systematic review of methods, outcomes and effects. *Res Involv Engagem*. 2017;3:9. doi: 10.1186/s40900-017-0060-4. PubMed PMID: 29062534; PubMed Central PMCID: PMC5611627.
  18. Shea BJ, Grimshaw JM, Wells GA, Boers M, Andersson N, Hamel C, et al. Development of AMSTAR: a measurement tool to assess the methodological quality of systematic reviews. *BMC Med Res Methodol*. 2007;7:10. doi: 10.1186/1471-2288-7-10. PubMed PMID: 17302989; PubMed Central PMCID: PMC1810543.
  19. McMaster University Hamilton (Canada) Health Evidence 2016 <http://www.healthevidence.org> Accessed 06.04.2016.
  20. Mc Master Health Forum (McMaster University Hamilton (Canada)) Health Systems Evidence 2016 <https://www.healthsystemsevidence.org> Accessed 06.04.2016.
  21. Moher D, Liberati A, Tetzlaff J, Altman DG, Grp P. Preferred Reporting Items for Systematic Reviews and Meta-Analyses: The PRISMA Statement. *Journal of Clinical Epidemiology*. 2009;62(10):1006-12. doi: 10.1016/j.jclinepi.2009.06.005. PubMed PMID: WOS:000270250500003.
  22. Akl Elie A, Oxman Andrew D, Herrin J, Vist Gunn E, Terrenato I, Sperati F, et al. Framing of health information messages. *Cochrane Database of Systematic Reviews* [Internet]. 2011; (12). Available from: <http://onlinelibrary.wiley.com/doi/10.1002/14651858.CD006777.pub2/abstract>.
  23. Bjelakovic G, Gluud Lise L, Nikolova D, Whitfield K, Krstic G, Wetterslev J, et al. Vitamin D supplementation for prevention of cancer in adults. *Cochrane Database of Systematic Reviews* [Internet]. 2014; (6). Available from: <http://onlinelibrary.wiley.com/doi/10.1002/14651858.CD007469.pub2/abstract>.
  24. Carney T, Myers Bronwyn J, Louw J, Okwundu Charles I. Brief school-based interventions and behavioural outcomes for substance-using adolescents. *Cochrane Database of Systematic Reviews* [Internet]. 2014; (2). Available from: <http://onlinelibrary.wiley.com/doi/10.1002/14651858.CD008969.pub2/abstract>.
  25. Chen W, Zhang Y, Li X, Yang G, Liu Jian P. Chinese herbal medicine for diabetic peripheral neuropathy. *Cochrane Database of Systematic Reviews* [Internet]. 2013; (10). Available from: <http://onlinelibrary.wiley.com/doi/10.1002/14651858.CD007796.pub3/abstract>.
  26. Cheuk Daniel KL, Chiang Alan KS, Lee Tsz L, Chan Godfrey CF, Ha Shau Y. Vaccines for prophylaxis of viral infections in patients with hematological malignancies. *Cochrane Database of Systematic Reviews* [Internet]. 2011; (3). Available from: <http://onlinelibrary.wiley.com/doi/10.1002/14651858.CD006505.pub2/abstract>.
  27. Fede G, Germani G, Gluud C, Gurusamy Kurinchi S, Burroughs Andrew K. Propylthiouracil for alcoholic liver disease. *Cochrane Database of Systematic Reviews* [Internet]. 2011; (6).

- Available from:  
<http://onlinelibrary.wiley.com/doi/10.1002/14651858.CD002800.pub3/abstract>.
28. Fonner Virginia A, Denison J, Kennedy Caitlin E, O'Reilly K, Sweat M. Voluntary counseling and testing (VCT) for changing HIV-related risk behavior in developing countries. Cochrane Database of Systematic Reviews [Internet]. 2012; (9). Available from: <http://onlinelibrary.wiley.com/doi/10.1002/14651858.CD001224.pub4/abstract>.
  29. Garrison Scott R, Allan GM, Sekhon Ravneet K, Musini Vijaya M, Khan Karim M. Magnesium for skeletal muscle cramps. Cochrane Database of Systematic Reviews [Internet]. 2012; (9). Available from: <http://onlinelibrary.wiley.com/doi/10.1002/14651858.CD009402.pub2/abstract>.
  30. Jefferson T, Rivetti A, Di Pietrantonj C, Demicheli V, Ferroni E. Vaccines for preventing influenza in healthy children. Cochrane Database of Systematic Reviews [Internet]. 2012; (8). Available from: <http://onlinelibrary.wiley.com/doi/10.1002/14651858.CD004879.pub4/abstract>.
  31. Jin H, Leng Q, Li C. Dietary flavonoid for preventing colorectal neoplasms. Cochrane Database of Systematic Reviews [Internet]. 2012; (8). Available from: <http://onlinelibrary.wiley.com/doi/10.1002/14651858.CD009350.pub2/abstract>.
  32. Jorge Eliane C, Jorge Edson N, El Dib Regina P. Early light reduction for preventing retinopathy of prematurity in very low birth weight infants. Cochrane Database of Systematic Reviews [Internet]. 2013; (8). Available from: <http://onlinelibrary.wiley.com/doi/10.1002/14651858.CD000122.pub2/abstract>.
  33. Junker Anders E, Als-Nielsen B, Gluud C, Gluud Lise L. Dopamine agents for hepatic encephalopathy. Cochrane Database of Systematic Reviews [Internet]. 2014; (2). Available from: <http://onlinelibrary.wiley.com/doi/10.1002/14651858.CD003047.pub3/abstract>.
  34. Karmali Kunal N, Davies P, Taylor F, Beswick A, Martin N, Ebrahim S. Promoting patient uptake and adherence in cardiac rehabilitation. Cochrane Database of Systematic Reviews [Internet]. 2014; (6). Available from: <http://onlinelibrary.wiley.com/doi/10.1002/14651858.CD007131.pub3/abstract>.
  35. Kwong Joey SW, Lau Hoi Lam C, Yeung F, Chau Pui H. Yoga for secondary prevention of coronary heart disease. Cochrane Database of Systematic Reviews [Internet]. 2015; (7). Available from: <http://onlinelibrary.wiley.com/doi/10.1002/14651858.CD009506.pub4/abstract>.
  36. Lager Kate E, Mistri Amit K, Khunti K, Haunton Victoria J, Sett Aung K, Wilson Andrew D. Interventions for improving modifiable risk factor control in the secondary prevention of stroke. Cochrane Database of Systematic Reviews [Internet]. 2014; (5). Available from: <http://onlinelibrary.wiley.com/doi/10.1002/14651858.CD009103.pub2/abstract>.
  37. Martí-Carvajal Arturo J, Knight-Madden Jennifer M, Martínez-Zapata Maria J. Interventions for treating leg ulcers in people with sickle cell disease. Cochrane Database of Systematic Reviews [Internet]. 2014; (12). Available from: <http://onlinelibrary.wiley.com/doi/10.1002/14651858.CD008394.pub3/abstract>.
  38. Moi JH, Sriranganathan MK, Edwards CJ, Buchbinder R. Lifestyle interventions for acute gout. Cochrane Database Syst Rev. 2013;(11):CD010519. doi: 10.1002/14651858.CD010519.pub2. PubMed PMID: 24186771.
  39. Nava F, Ghilotti F, Maggi L, Hatemi G, Del Bianco A, Merlo C, et al. Biologics, colchicine, corticosteroids, immunosuppressants and interferon-alpha for Neuro-Behçet's Syndrome. Cochrane Database of Systematic Reviews [Internet]. 2014; (12). Available from:

- 1  
2  
3 <http://onlinelibrary.wiley.com/doi/10.1002/14651858.CD010729.pub2/abstract>.
- 4 40. Njei B, Kongnyuy Eugene J, Kumar S, Okwen Mbah P, Sankar Mari J, Mbuagbaw L. Optimal  
5 timing for antiretroviral therapy initiation in patients with HIV infection and concurrent  
6 cryptococcal meningitis. Cochrane Database of Systematic Reviews [Internet]. 2013; (2).  
7 Available from:  
8 <http://onlinelibrary.wiley.com/doi/10.1002/14651858.CD009012.pub2/abstract>.
- 9 41. Okwundu Charles I, Nagpal S, Musekiwa A, Sinclair D. Home- or community-based  
10 programmes for treating malaria. Cochrane Database of Systematic Reviews [Internet].  
11 2013; (5). Available from:  
12 <http://onlinelibrary.wiley.com/doi/10.1002/14651858.CD009527.pub2/abstract>.
- 13 42. Olsen O, Clausen Jette A. Planned hospital birth versus planned home birth. Cochrane  
14 Database of Systematic Reviews [Internet]. 2012; (9). Available from:  
15 <http://onlinelibrary.wiley.com/doi/10.1002/14651858.CD000352.pub2/abstract>.
- 16 43. Overdeest Gijsbert M, Jacobs W, Vleggeert-Lankamp C, Thomé C, Gunzburg R, Peul W.  
17 Effectiveness of posterior decompression techniques compared with conventional  
18 laminectomy for lumbar stenosis. Cochrane Database of Systematic Reviews [Internet].  
19 2015; (3). Available from:  
20 <http://onlinelibrary.wiley.com/doi/10.1002/14651858.CD010036.pub2/abstract>.
- 21 44. Peckham Emily J, Nelson EA, Greenhalgh J, Cooper K, Roberts ER, Agrawal A. Homeopathy  
22 for treatment of irritable bowel syndrome. Cochrane Database of Systematic Reviews  
23 [Internet]. 2013; (11). Available from:  
24 <http://onlinelibrary.wiley.com/doi/10.1002/14651858.CD009710.pub2/abstract>.
- 25 45. Rahimi-Movaghar A, Amin-Esmaeili M, Hefazi M, Yousefi-Nooraie R. Pharmacological  
26 therapies for maintenance treatments of opium dependence. Cochrane Database of  
27 Systematic Reviews [Internet]. 2013; (1). Available from:  
28 <http://onlinelibrary.wiley.com/doi/10.1002/14651858.CD007775.pub2/abstract>.
- 29 46. Shields L, Zhou H, Pratt J, Taylor M, Hunter J, Pascoe E. Family-centred care for  
30 hospitalised children aged 0-12 years. Cochrane Database of Systematic Reviews  
31 [Internet]. 2012; (10). Available from:  
32 <http://onlinelibrary.wiley.com/doi/10.1002/14651858.CD004811.pub3/abstract>.
- 33 47. Smart Neil A, Marshall Belinda J, Daley M, Boulos E, Windus J, Baker N, et al. Low-fat diets  
34 for acquired hypercholesterolaemia. Cochrane Database of Systematic Reviews [Internet].  
35 2011; (2). Available from:  
36 <http://onlinelibrary.wiley.com/doi/10.1002/14651858.CD007957.pub2/abstract>.
- 37 48. Taylor F, Huffman Mark D, Macedo Ana F, Moore Theresa HM, Burke M, Davey Smith G,  
38 et al. Statins for the primary prevention of cardiovascular disease. Cochrane Database of  
39 Systematic Reviews [Internet]. 2013; (1). Available from:  
40 <http://onlinelibrary.wiley.com/doi/10.1002/14651858.CD004816.pub5/abstract>.
- 41 49. Taylor Matthew J, Rudkin L, Bullemor-Day P, Lubin J, Chukwujekwu C, Hawton K.  
42 Strategies for managing sexual dysfunction induced by antidepressant medication.  
43 Cochrane Database of Systematic Reviews [Internet]. 2013; (5). Available from:  
44 <http://onlinelibrary.wiley.com/doi/10.1002/14651858.CD003382.pub3/abstract>.
- 45 50. Tejani Aaron M, Wasdell M, Spiwak R, Rowell G, Nathwani S. Carnitine for fatigue in  
46 multiple sclerosis. Cochrane Database of Systematic Reviews [Internet]. 2012; (5).  
47 Available from:  
48 <http://onlinelibrary.wiley.com/doi/10.1002/14651858.CD007280.pub3/abstract>.
- 49 51. Thomas Roger E, Lorenzetti D, Spragins W. Mentoring adolescents to prevent drug and  
50  
51  
52  
53  
54  
55  
56  
57  
58  
59  
60

- 1  
2  
3 alcohol use. Cochrane Database of Systematic Reviews [Internet]. 2011; (11). Available  
4 from: <http://onlinelibrary.wiley.com/doi/10.1002/14651858.CD007381.pub2/abstract>.
52. Agarwal R, Goldenberg M, Perry R, IsHak WW. The quality of life of adults with attention  
6 deficit hyperactivity disorder: a systematic review. *Innov Clin Neurosci*. 2012;9(5-6):10-21.  
7 PubMed PMID: 22808445; PubMed Central PMCID: PMCPMC3398685.
- 8 53. Ahmed AA, Alsharief E, Alsharief A. Intensive versus conventional glycemic control: What  
9 is best for patients with type 2 diabetes? *Diabetes and Metabolic Syndrome: Clinical  
10 Research and Reviews*. 2013;7(1):48-51.
- 11 54. Albrecht B, Staiger PK, Hall K, Miller P, Best D, Lubman DI. Benzodiazepine use and  
12 aggressive behaviour: A systematic review. *Australian and New Zealand Journal of  
13 Psychiatry*. 2014;48(12):1096-114.
- 14 55. Bak A, Browne J, Loveday HP, Tsiami A. Systematic review of nutritional interventions to  
15 prevent healthcare-associated infections in undernourished elderly. *Proceedings of the  
16 Nutrition Society*. 2013;72:E212.
- 17 56. Blasco MA, Redleaf MI. Cochlear implantation in unilateral sudden deafness improves  
18 tinnitus and speech comprehension: meta-analysis and systematic review. *Otology &  
19 neurotology* : official publication of the American Otological Society, American  
20 Neurotology Society [and] European Academy of Otology and Neurotology.  
21 2014;35(8):1426-32.
- 22 57. Bourke L, Homer KE, Thaha MA, Steed L, Rosario DJ, Robb KA, et al. Interventions to  
23 improve exercise behaviour in sedentary people living with and beyond cancer: A  
24 systematic review. *British Journal of Cancer*. 2014;110(4):831-41.
- 25 58. Chien TJ, Liu CY, Chang YF, Fang CJ, Hsu CH. Acupuncture for treating aromatase inhibitor-  
26 related arthralgia in breast cancer: a systematic review and meta-analysis. *Journal of  
27 Alternative & Complementary Medicine*. 2015;21(5):251-60. PubMed PMID: 25915433.
- 28 59. Collins CE, Burrows TL, Bray J, Asher R, Young M, Morgan PJ. Effectiveness of parent-  
29 centred interventions for the prevention and treatment of childhood overweight and  
30 obesity in community settings: A systematic review. *JBIC Database of Systematic Reviews  
31 and Implementation Reports*. 2013;11(9):180-257.
- 32 60. Foersch M, Jacobs C, Wriedt S, Hechtner M, Wehrbein H. Effectiveness of maxillary  
33 protraction using facemask with or without maxillary expansion: a systematic review and  
34 meta-analysis. *Clinical Oral Investigations*. 2015;19(6):1181-92. doi: 10.1007/s00784-015-  
35 1478-4. PubMed PMID: 25982454.
- 36 61. Gibbs M, Winsper C, Marwaha S, Gilbert E, Broome M, Singh SP. Cannabis use and mania  
37 symptoms: A systematic review and meta-analysis. *European Psychiatry*. 2015;30:1128.
- 38 62. Guerin M, Grimmer K, Kumar S. Community services' involvement in the discharge of  
39 older adults from hospital into the community. *International Journal Of Integrated Care*.  
40 2013;13:e032-e. PubMed PMID: 24179455.
- 41 63. Hu MB, Xu H, Bai PD, Jiang HW, Ding Q. Obesity has multifaceted impact on biochemical  
42 recurrence of prostate cancer: A dose-response meta-analysis of 36,927 patients. *Medical  
43 Oncology*. 2014;31(2).
- 44 64. Johantgen M, Fountain L, Zangaro G, Newhouse R, Stanik-Hutt J, White K. Comparison of  
45 labor and delivery care provided by certified nurse-midwives and physicians: a systematic  
46 review, 1990 to 2008. *Womens Health Issues*. 2012;22(1):e73-81. PubMed PMID:  
47 21865056.
- 48 65. Lankhaar JA, de Vries WR, Jansen JA, Zelissen PM, Backx FJ. Impact of overt and  
49 subclinical hypothyroidism on exercise tolerance: a systematic review. *Research Quarterly*  
50  
51  
52  
53  
54  
55  
56  
57  
58  
59  
60



- 1  
2  
3 for Exercise & Sport. 2014;85(3):365-89. PubMed PMID: 25141089.
- 4 66. Llewellyn A, Simmonds M, Owen CG, Woolacott N. Childhood obesity as a predictor of  
5 morbidity in adulthood: a systematic review and meta-analysis. *Obesity Reviews: An*  
6 *Official Journal Of The International Association For The Study Of Obesity*. 2015. doi:  
7 10.1111/obr.12316. PubMed PMID: 26440472.
- 8 67. Maglione MA, Das L, Raaen L, Smith A, Chari R, Newberry S, et al. Safety of vaccines used  
9 for routine immunization of US children: A systematic review. *Pediatrics*.  
10 2014;134(2):325-37.
- 11 68. Matsuda A, Yamaoka K, Tango T, Matsuda T, Nishimoto H. Effectiveness of  
12 psychoeducational support on quality of life in early-stage breast cancer patients: a  
13 systematic review and meta-analysis of randomized controlled trials. *Quality of life*  
14 *research : an international journal of quality of life aspects of treatment, care and*  
15 *rehabilitation*. 2014;23(1):21-30.
- 16 69. Panagioti M, Gooding PA, Triantafyllou K, Tarrier N. Suicidality and posttraumatic stress  
17 disorder (PTSD) in adolescents: a systematic review and meta-analysis. *Social Psychiatry*  
18 *And Psychiatric Epidemiology*. 2015;50(4):525-37. doi: 10.1007/s00127-014-0978-x.  
19 PubMed PMID: 25398198.
- 20 70. Rodgers M, Asaria M, Walker S, McMillan D, Lucock M, Harden M, et al. The clinical  
21 effectiveness and cost-effectiveness of low-intensity psychological interventions for the  
22 secondary prevention of relapse after depression: A systematic review. *Health*  
23 *Technology Assessment*. 2012;16(28):1-129.
- 24 71. Rolka EJ, Silverman MJ. A systematic review of music and dyslexia. *Arts in Psychotherapy*.  
25 2015;46:24-32.
- 26 72. Rozet F, Bastide C, Beuzeboc P, Cormier L, Fromont G, Hennequin C, et al. Prise en charge  
27 des tumeurs de la prostate a faible risque evolutif. *Progres en Urologie*. 2015;25(1):1-10.  
28 PubMed PMID: 25454776.
- 29 73. Rush CJ, Campbell RT, Jhund PS, Connolly EC, Preiss D, Gardner RS, et al. Falling  
30 Cardiovascular Mortality in Heart Failure With Reduced Ejection Fraction and Implications  
31 for Clinical Trials. *JACC: Heart Failure*. 2015;3(8):603-14.
- 32 74. Scott IC, Tan R, Stahl D, Steer S, Lewis CM, Cope AP. The protective effect of alcohol on  
33 developing rheumatoid arthritis: A systematic review and meta-analysis. *Rheumatology*  
34 *(United Kingdom)*. 2013;52(5):856-67.
- 35 75. Siffredi V, Anderson V, Leventer RJ, Spencer-Smith MM. Neuropsychological profile of  
36 agenesis of the corpus callosum: A systematic review. *Developmental Neuropsychology*.  
37 2013;38(1):36-57.
- 38 76. Sipe TA, Finnie RKC, Knopf JA, Qu S, Reynolds JA, Thota AB, et al. Effects of mental health  
39 benefits legislation: A community guide systematic review. *American Journal of*  
40 *Preventive Medicine*. 2015;48(6):755-66.
- 41 77. Te Morenga L, Mallard S, Mann J. Dietary sugars and body weight: systematic review and  
42 meta-analyses of randomised controlled trials and cohort studies. *BMJ (Clinical Research*  
43 *Ed)*. 2012;346:e7492-e. doi: 10.1136/bmj.e7492. PubMed PMID: 23321486.
- 44 78. Tricco AC, Antony J, Khan PA, Ghassemi M, Hamid JS, Ashoor H, et al. Safety and  
45 effectiveness of dipeptidyl peptidase-4 inhibitors versus intermediate-acting insulin or  
46 placebo for patients with type 2 diabetes failing two oral antihyperglycaemic agents: a  
47 systematic review and network meta-analysis. *BMJ Open*. 2014;4(12):e005752. PubMed  
48 PMID: 25537781.
- 49 79. Vasconcellos F, Seabra A, Katzmarzyk PT, Kraemer-Aguiar LG, Bouskela E, Farinatti P.
- 50  
51  
52  
53  
54  
55  
56  
57  
58  
59  
60

- 1  
2  
3 Physical activity in overweight and obese adolescents: systematic review of the effects on  
4 physical fitness components and cardiovascular risk factors. *Sports medicine (Auckland,*  
5 *NZ)*. 2014;44(8):1139-52.  
6  
7 80. Wang Z. Age-dependent decline of association between obesity and mortality: A  
8 systematic review and meta-analysis. *Obesity Research and Clinical Practice*. 2015;9(1):1-  
9 11.  
10 81. Wu S, Cohen D, Shi Y, Pearson M, Sturm R. Economic analysis of physical activity  
11 interventions. *American Journal of Preventive Medicine*. 2011;40(2):149-58.  
12 82. Sedation and Anesthesia Options for Diagnostic Procedures: A Review of Clinical  
13 Effectiveness and Guidelines. 2015. PubMed PMID: 26180868.  
14 83. Attree P, French B, Milton B, Povall S, Whitehead M, Popay J. The experience of  
15 community engagement for individuals: a rapid review of evidence. *Health & Social Care*  
16 *In The Community*. 2011;19(3):250-60. doi: 10.1111/j.1365-2524.2010.00976.x. PubMed  
17 PMID: 21138495.  
18 84. Barry MM, D'Eath M, Sixsmith J. Interventions for improving population health literacy:  
19 insights from a rapid review of the evidence. *Journal Of Health Communication*.  
20 2013;18(12):1507-22. doi: 10.1080/10810730.2013.840699. PubMed PMID: 24298885.  
21 85. Beall RF, Baskerville N, Golfam M, Saeed S, Little J. Modes of delivery in preventive  
22 intervention studies: A rapid review. *European Journal of Clinical Investigation*.  
23 2014;44(7):688-96.  
24 86. Beck CR, Sokal R, Arunachalam N, Puleston R, Cichowska A, Kessel A, et al. Neuraminidase  
25 inhibitors for influenza: a review and public health perspective in the aftermath of the  
26 2009 pandemic. *Influenza And Other Respiratory Viruses*. 2013;7 Suppl 1:14-24. doi:  
27 10.1111/irv.12048. PubMed PMID: 23279893.  
28 87. Boyce T, Holmes A. Addressing Health Inequalities in the Delivery of the Human  
29 Papillomavirus Vaccination Programme: Examining the Role of the School Nurse. *PLoS*  
30 *ONE*. 2012;7(9).  
31 88. Brunton G, Paraskeva N, Caird J, Bird KS, Kavanagh J, Kwan I, et al. Psychosocial  
32 predictors, assessment, and outcomes of cosmetic procedures: a systematic rapid  
33 evidence assessment. *Aesthetic Plastic Surgery*. 2014;38(5):1030-40. doi:  
34 10.1007/s00266-014-0369-4. PubMed PMID: 24962402.  
35 89. Butow P, Price MA, Shaw JM, Turner J, Clayton JM, Grimison P, et al. Clinical pathway for  
36 the screening, assessment and management of anxiety and depression in adult cancer  
37 patients: Australian guidelines. *Psycho-Oncology*. 2015;24(9):987-1001.  
38 90. Costello RB, Lentino CV, Boyd CC, O'Connell ML, Crawford CC, Sprengel ML, et al. The  
39 effectiveness of melatonin for promoting healthy sleep: A rapid evidence assessment of  
40 the literature. *Nutrition Journal*. 2014:106.  
41 91. Crawford C, Lee C, Bingham J, Buckenmaier CC, Crawford P, Delgado R, et al. Sensory art  
42 therapies for the self-management of chronic pain symptoms. *Pain Medicine (United*  
43 *States)*. 2014;15(S1):S66-S75.  
44 92. Crawford C, Lee C, May T, Buckenmaier CC, Crawford P, Delgado R, et al. Physically  
45 oriented therapies for the self-management of chronic pain symptoms. *Pain Medicine*  
46 *(United States)*. 2014;15(S1):S54-S65.  
47 93. Dorresteyn PM, Ipenburg NA, Murphy KJ, Smit M, Van Vulpen JK, Wegner I, et al. Rapid  
48 systematic review of normal audiometry results as a predictor for benign paroxysmal  
49 positional vertigo. *Otolaryngology - Head and Neck Surgery (United States)*.  
50 2014;150(6):919-24.  
51  
52  
53  
54  
55  
56  
57  
58  
59  
60

- 1
  - 2
  - 3
  - 4
  - 5
  - 6
  - 7
  - 8
  - 9
  - 10
  - 11
  - 12
  - 13
  - 14
  - 15
  - 16
  - 17
  - 18
  - 19
  - 20
  - 21
  - 22
  - 23
  - 24
  - 25
  - 26
  - 27
  - 28
  - 29
  - 30
  - 31
  - 32
  - 33
  - 34
  - 35
  - 36
  - 37
  - 38
  - 39
  - 40
  - 41
  - 42
  - 43
  - 44
  - 45
  - 46
  - 47
  - 48
  - 49
  - 50
  - 51
  - 52
  - 53
  - 54
  - 55
  - 56
  - 57
  - 58
  - 59
  - 60
94. Geddes R, Frank J, Haw S. A rapid review of key strategies to improve the cognitive and social development of children in Scotland. *Health Policy (Amsterdam, Netherlands)*. 2011;101(1):20-8. doi: 10.1016/j.healthpol.2010.08.013. PubMed PMID: 20822824.
95. Hithersay R, Strydom A, Moulster G, Buszewicz M. Carer-led health interventions to monitor, promote and improve the health of adults with intellectual disabilities in the community: a systematic review. *Research In Developmental Disabilities*. 2014;35(4):887-907. doi: 10.1016/j.ridd.2014.01.010. PubMed PMID: 24495402.
96. Humphreys DK, Ogilvie D. Synthesising evidence for equity impacts of population-based physical activity interventions: A pilot study. *International Journal of Behavioral Nutrition and Physical Activity*. 2013;10.
97. Jiwa M, McManus A, Dadich A. Continuity of cancer care: Where do primary care practitioners fit in? *Cancer Forum*. 2013;37(1):31-4.
98. Kreindler SA, Cui Y, Metge CJ, Raynard M. Patient characteristics associated with longer emergency department stay: A rapid review. *Emergency Medicine Journal*. 2015.
99. Kwok E, Konnyu KJ, Skidmore B, Moher D. Effectiveness and safety of emergency department short-stay units: A rapid review. *Canadian Journal of Emergency Medicine*. 2012;14:S5-S6.
100. Lal S, Adair CE. E-mental health: A rapid review of the literature. *Psychiatric Services*. 2014;65(1):24-32.
101. Lee C, Crawford C, Schoomaker E, Buckenmaier CC, Crawford P, Delgado R, et al. Movement therapies for the self-management of chronic pain symptoms. *Pain Medicine (United States)*. 2014;15(S1):S40-S53.
102. Lee C, Crawford C, Swann S. Multimodal, integrative therapies for the self-management of chronic pain symptoms. *Pain Medicine (Malden, Mass)*. 2014;15 Suppl 1:S76-S85. doi: 10.1111/pme.12408. PubMed PMID: 24734863.
103. Mann R, Gilbody S. Validity of two case finding questions to detect postnatal depression: a review of diagnostic test accuracy. *Journal Of Affective Disorders*. 2011;133(3):388-97. doi: 10.1016/j.jad.2010.11.015. PubMed PMID: 21146230.
104. McMurrin M. Individual-level interventions for alcohol-related violence: a rapid evidence assessment. *Criminal Behaviour And Mental Health: CBMH*. 2012;22(1):14-28. doi: 10.1002/cbm.821. PubMed PMID: 21823184.
105. Menear M, Briand C. Implementing a continuum of evidence-based psychosocial interventions for people with severe mental illness: part 1-review of major initiatives and implementation strategies. *Canadian Journal Of Psychiatry Revue Canadienne De Psychiatrie*. 2014;59(4):178-86. PubMed PMID: 25007110.
106. Moe-Byrne T, Chambers D, Harden M, McDaid C. Behaviour change interventions to promote prescribing of generic drugs: a rapid evidence synthesis and systematic review. *BMJ Open*. 2014;4(5):e004623-e. doi: 10.1136/bmjopen-2013-004623. PubMed PMID: 24833683.
107. Muñoz K, Caballero A, White K. Effectiveness of questionnaires for screening hearing of school-age children: a comprehensive literature review. *International Journal Of Audiology*. 2014;53(12):910-4. doi: 10.3109/14992027.2014.943846. PubMed PMID: 25140604.
108. Ndumbe-Eyoh S, Moffatt H. Intersectoral action for health equity: a rapid systematic review. *BMC Public Health*. 2013;13:1056-. doi: 10.1186/1471-2458-13-1056. PubMed PMID: 24209299.
109. Saeed S, Golfam M, Beall RF, Ashbury FD, Palmer LJ, Little J. Effectiveness of individual-



- 1  
2  
3 focused interventions to prevent chronic disease. *European Journal Of Clinical*  
4 *Investigation*. 2014;44(9):883-91. doi: 10.1111/eci.12298. PubMed PMID: 25041535.
- 5  
6 110. Trivedy CR, Cooke MW. Unscheduled Return Visits (URV) in adults to the Emergency  
7 Department (ED): A rapid evidence assessment policy review. *Emergency Medicine*  
8 *Journal*. 2015;32(4):324-9.
- 9  
10 111. Yu J, Wang Y, Li Y, Li X, Li C, Shen JT. The Da Vinci surgical system: A rapid review of the  
11 clinical and economic evidence. *Value in Health*. 2014;17(7):A798.
- 12  
13 112. Aerobic exercise training in patients with heart failure: a rapid review (Structured  
14 abstract). *Health Technology Assessment Database [Internet]*. 2015; (3). Available from:  
15 <http://onlinelibrary.wiley.com/o/cochrane/clhta/articles/HTA-32015000505/frame.html>.
- 16  
17 113. Criteria for referral to home care: a rapid review (Structured abstract). *Health Technology*  
18 *Assessment Database [Internet]*. 2015; (3). Available from:  
19 <http://onlinelibrary.wiley.com/o/cochrane/clhta/articles/HTA-32015000501/frame.html>.
- 20  
21 114. Physical activity counselling: a rapid review (Structured abstract). *Health Technology*  
22 *Assessment Database [Internet]*. 2015; (3). Available from:  
23 <http://onlinelibrary.wiley.com/o/cochrane/clhta/articles/HTA-32015000508/frame.html>.
- 24  
25 115. Care coordination for postacute stroke, chronic obstructive pulmonary disease, and heart  
26 failure clients: an economic rapid review (Structured abstract). *Health Technology*  
27 *Assessment Database [Internet]*. 2015; (3). Available from:  
28 <http://onlinelibrary.wiley.com/o/cochrane/clhta/articles/HTA-32015000492/frame.html>.
- 29  
30 116. Sodium restriction in heart failure: a rapid review (Structured abstract). *Health*  
31 *Technology Assessment Database [Internet]*. 2015; (3). Available from:  
32 <http://onlinelibrary.wiley.com/o/cochrane/clhta/articles/HTA-32015000504/frame.html>.
- 33  
34 117. Cognitive-behavioural therapy for anxiety and depression in patients with chronic  
35 obstructive pulmonary disease (COPD): a rapid review (Structured abstract). *Health*  
36 *Technology Assessment Database [Internet]*. 2015; (3). Available from:  
37 <http://onlinelibrary.wiley.com/o/cochrane/clhta/articles/HTA-32015000486/frame.html>.
- 38  
39 118. Communication of discharge instructions: a rapid review (Structured abstract). *Health*  
40 *Technology Assessment Database [Internet]*. 2015; (3). Available from:  
41 <http://onlinelibrary.wiley.com/o/cochrane/clhta/articles/HTA-32015000500/frame.html>.
- 42  
43 119. Prophylactic antibiotics for individuals with Chronic Obstructive Pulmonary Disease  
44 (COPD): a rapid review (Structured abstract). *Health Technology Assessment Database*  
45 *[Internet]*. 2015; (3). Available from:  
46 <http://onlinelibrary.wiley.com/o/cochrane/clhta/articles/HTA-32015000489/frame.html>.
- 47  
48 120. Respiratory therapy services in home care for individuals with chronic obstructive  
49 pulmonary disease (COPD): a rapid review (Structured abstract). *Health Technology*  
50 *Assessment Database [Internet]*. 2015; (3). Available from:  
51 <http://onlinelibrary.wiley.com/o/cochrane/clhta/articles/HTA-32015000491/frame.html>.
- 52  
53 121. Exercise programs after pulmonary rehabilitation for patients with chronic obstructive  
54 pulmonary disease (COPD): a rapid review (Structured abstract). *Health Technology*  
55 *Assessment Database [Internet]*. 2015; (3). Available from:  
56 <http://onlinelibrary.wiley.com/o/cochrane/clhta/articles/HTA-32015000488/frame.html>.
- 57  
58 122. Baidoobonso S. Effect of supportive interventions on informal caregivers of people at the  
59 end of life: a rapid review (Structured abstract). *Health Technology Assessment Database*  
60 *[Internet]*. 2014; (3). Available from:  
<http://onlinelibrary.wiley.com/o/cochrane/clhta/articles/HTA-32015000095/frame.html>.
123. Brener S. Optimal timing to begin an active rehabilitation program after a hip fracture: a

- 1  
2  
3 rapid review (Structured abstract). Health Technology Assessment Database [Internet].  
4 2013; (3). Available from: [http://onlinelibrary.wiley.com/o/cochrane/clhta/articles/HTA-](http://onlinelibrary.wiley.com/o/cochrane/clhta/articles/HTA-32014001040/frame.html)  
5 [32014001040/frame.html](http://onlinelibrary.wiley.com/o/cochrane/clhta/articles/HTA-32014001040/frame.html).  
6
- 7 124. Brener S. Effectiveness and safety of thrombolytics for the treatment of ischemic stroke: a  
8 rapid review (Structured abstract). Health Technology Assessment Database [Internet].  
9 2013; (3). Available from: [http://onlinelibrary.wiley.com/o/cochrane/clhta/articles/HTA-](http://onlinelibrary.wiley.com/o/cochrane/clhta/articles/HTA-32014001030/frame.html)  
10 [32014001030/frame.html](http://onlinelibrary.wiley.com/o/cochrane/clhta/articles/HTA-32014001030/frame.html).  
11
- 12 125. Bungay H, Vella-Burrows T. The effects of participating in creative activities on the health  
13 and well-being of children and young people: a rapid review of the literature (Provisional  
14 abstract). Perspectives in Public Health [Internet]. 2013; 133(1):[44-52 pp.]. Available  
15 from: [http://onlinelibrary.wiley.com/o/cochrane/cldare/articles/DARE-](http://onlinelibrary.wiley.com/o/cochrane/cldare/articles/DARE-12013008651/frame.html)  
16 [12013008651/frame.html](http://onlinelibrary.wiley.com/o/cochrane/cldare/articles/DARE-12013008651/frame.html)  
17 <http://rsh.sagepub.com/content/133/1/44.full.pdf>.  
18
- 19 126. Ghazipura M. Optimal timing for antibiotic administration in patients with community-  
20 acquired pneumonia: a rapid review (Structured abstract). Health Technology Assessment  
21 Database [Internet]. 2013; (3). Available from:  
22 <http://onlinelibrary.wiley.com/o/cochrane/clhta/articles/HTA-32014001051/frame.html>.  
23
- 24 127. Ghazipura M. Community versus inpatient rehabilitation in hip fracture patients: a rapid  
25 review (Structured abstract). Health Technology Assessment Database [Internet]. 2013;  
26 (3). Available from: [http://onlinelibrary.wiley.com/o/cochrane/clhta/articles/HTA-](http://onlinelibrary.wiley.com/o/cochrane/clhta/articles/HTA-32014001045/frame.html)  
27 [32014001045/frame.html](http://onlinelibrary.wiley.com/o/cochrane/clhta/articles/HTA-32014001045/frame.html).  
28
- 29 128. Ghazipura M. Cardiovascular and aerobic exercise in postacute stroke patients: a rapid  
30 review (Structured abstract). Health Technology Assessment Database [Internet]. 2015;  
31 (3). Available from: [http://onlinelibrary.wiley.com/o/cochrane/clhta/articles/HTA-](http://onlinelibrary.wiley.com/o/cochrane/clhta/articles/HTA-32015000494/frame.html)  
32 [32015000494/frame.html](http://onlinelibrary.wiley.com/o/cochrane/clhta/articles/HTA-32015000494/frame.html).  
33
- 34 129. Ghazipura M. Home-based versus centre-based rehabilitation for community-dwelling  
35 postacute stroke patients: an economic rapid review (Structured abstract). Health  
36 Technology Assessment Database [Internet]. 2015; (3). Available from:  
37 <http://onlinelibrary.wiley.com/o/cochrane/clhta/articles/HTA-32015000493/frame.html>.  
38
- 39 130. Kabali C. Self-management and educational interventions in the postacute stroke  
40 population: a rapid review (Structured abstract). Health Technology Assessment Database  
41 [Internet]. 2015; (3). Available from:  
42 <http://onlinelibrary.wiley.com/o/cochrane/clhta/articles/HTA-32015000498/frame.html>.  
43
- 44 131. Lambrinos A. Preoperative consultation: a rapid review (Structured abstract). Health  
45 Technology Assessment Database [Internet]. 2014; (3). Available from:  
46 <http://onlinelibrary.wiley.com/o/cochrane/clhta/articles/HTA-32014001064/frame.html>.  
47
- 48 132. Lambrinos A. Medication reconciliation at discharge: a rapid review (Structured abstract).  
49 Health Technology Assessment Database [Internet]. 2015; (3). Available from:  
50 <http://onlinelibrary.wiley.com/o/cochrane/clhta/articles/HTA-32015000507/frame.html>.  
51
- 52 133. Lambrinos A. Home-based exercise programs in heart failure: a rapid review (Structured  
53 abstract). Health Technology Assessment Database [Internet]. 2015; (3). Available from:  
54 <http://onlinelibrary.wiley.com/o/cochrane/clhta/articles/HTA-32015000506/frame.html>.  
55
- 56 134. Ling D. Role of screening for respiratory syncytial virus or influenza and empirical antiviral  
57 treatment for patients with community-acquired pneumonia: a rapid review (Structured  
58 abstract). Health Technology Assessment Database [Internet]. 2013; (3). Available from:  
59 <http://onlinelibrary.wiley.com/o/cochrane/clhta/articles/HTA-32014001055/frame.html>.  
60
135. McCurdy BR. Inhospital physiotherapy for acute exacerbations of chronic obstructive

- 1  
2  
3 pulmonary disease (AECOPD): a rapid review (Structured abstract). Health Technology  
4 Assessment Database [Internet]. 2013; (3). Available from:  
5 <http://onlinelibrary.wiley.com/doi/10.1111/hta.12107>.
- 6  
7 136. McCurdy BR. Action plans for individuals with chronic obstructive pulmonary disease  
8 (COPD): a rapid review (Structured abstract). Health Technology Assessment Database  
9 [Internet]. 2013; (3). Available from:  
10 <http://onlinelibrary.wiley.com/doi/10.1111/hta.12106>.
- 11  
12 137. Miani C, Ball S, Pitchforth E, Exley J, King S, Roland M, et al. Organisational interventions  
13 to reduce length of stay in hospital: a rapid evidence assessment (Structured abstract).  
14 Health Technology Assessment Database [Internet]. 2014; (3). Available from:  
15 <http://onlinelibrary.wiley.com/doi/10.1111/hta.12158>.
- 16  
17 138. Nikitovic M. Intensity of rehabilitation after hip fracture: a rapid review (Structured  
18 abstract). Health Technology Assessment Database [Internet]. 2013; (3). Available from:  
19 <http://onlinelibrary.wiley.com/doi/10.1111/hta.12104>.
- 20  
21 139. Schaink A. The effectiveness of statins for primary prevention: a rapid review (Structured  
22 abstract). Health Technology Assessment Database [Internet]. 2013; (3). Available from:  
23 <http://onlinelibrary.wiley.com/doi/10.1111/hta.12137>.
- 24  
25 140. Wang M. Airway clearance techniques for patients with stable chronic obstructive  
26 pulmonary disease (COPD): a rapid review (Structured abstract). Health Technology  
27 Assessment Database [Internet]. 2015; (3). Available from:  
28 <http://onlinelibrary.wiley.com/doi/10.1111/hta.12500>.
- 29  
30 141. Wang M. Pulmonary rehabilitation in the home versus other settings for individuals with  
31 chronic obstructive pulmonary disease (COPD): a rapid review (Structured abstract).  
32 Health Technology Assessment Database [Internet]. 2015; (3). Available from:  
33 <http://onlinelibrary.wiley.com/doi/10.1111/hta.12500>.
- 34  
35 142. Cottrell E, Whitlock E, Kato E, Uhl S, Belinson S, Chang C, et al. Defining the Benefits of  
36 Stakeholder Engagement in Systematic Reviews. AHRQ Methods for Effective Health Care.  
37 Rockville (MD)2014.
- 38  
39 143. Keown K, Van Eerd D, Irvin E. Stakeholder engagement opportunities in systematic  
40 reviews: knowledge transfer for policy and practice. J Contin Educ Health Prof.  
41 2008;28(2):67-72. doi: 10.1002/chp.159. PubMed PMID: 18521874.  
42  
43  
44  
45  
46  
47  
48  
49  
50  
51  
52  
53  
54  
55  
56  
57  
58  
59  
60

## Supplementary files

**File S1. Study protocol**

**File S2. PRISMA checklist**

**File S3a. Search strategy for systematic reviews in EBSCO Medline**

**File S3b. Search strategy for rapid reviews in Embase**

**File S4. Data extraction file: AMSTAR ratings**

**File S5. Data extraction file: Study characteristics**

**Table S1. References of excluded studies**

**Table S2. Characteristics of the study population by type of included review**

1  
2  
3  
4  
5  
6  
7  
8  
9  
10  
11  
12  
13  
14  
15  
16  
17  
18  
19  
20  
21  
22  
23  
24  
25  
26  
27  
28  
29  
30  
31  
32  
33  
34  
35  
36  
37  
38  
39  
40  
41  
42  
43  
44  
45  
46  
47  
48  
49  
50  
51  
52  
53  
54  
55  
56  
57  
58  
59  
60

**Figure 1**

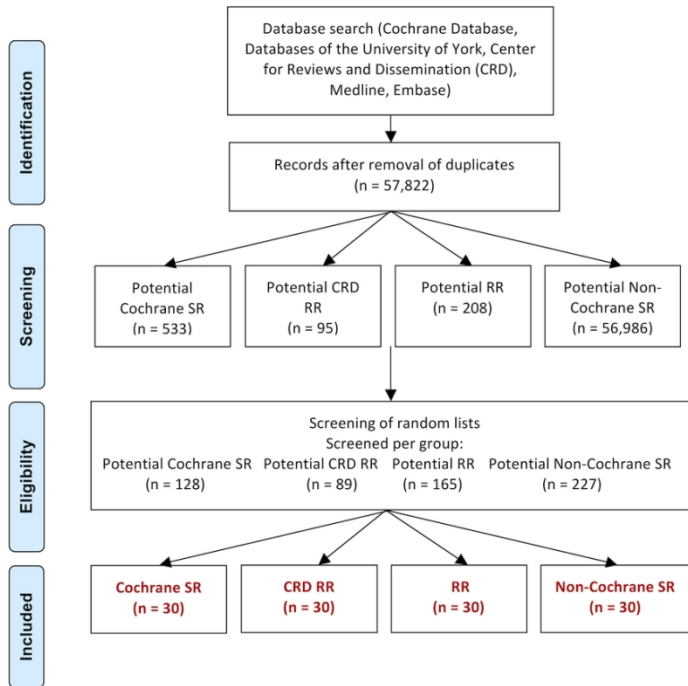

Flow diagram of study selection.

CRD: Databases of the University of York, Center for Reviews and Dissemination; RR: rapid review; SR: systematic review

98x128mm (300 x 300 DPI)

# Stakeholder involvement in systematic and rapid reviews of health services research

Protocol version 2

## 1. Background

### *Description of full systematic reviews (SR) and rapid reviews (RR)*

According to the Cochrane handbook (1), a traditional systematic review is a review that “attempts to collate all empirical evidence that fits pre-specified eligibility criteria in order to answer a specific research question. It uses explicit, systematic methods that are selected with a view to minimizing bias, thus providing more reliable findings from which conclusions can be drawn and decisions made”. While systematic reviews are considered to be the gold standard in knowledge synthesis, they are not without their limitations. For example, they usually require between 6 months and 2 years to complete and often focus on a narrow clinical question or set of questions. (2)

The key characteristics of a systematic review are (a) a clearly stated set of objectives with an explicit, reproducible methodology; (b) a systematic search that attempts to identify all studies that would meet the eligibility criteria; (c) an assessment of the validity of the findings of the included studies (e.g., assessment of risk of bias and confidence in cumulative estimates); and (d) systematic presentation, and synthesis, of the characteristics and findings of the included studies. (3) Systematic reviews should build on a protocol that describes the rationale, hypothesis, and planned methods of the review; few reviews report whether a protocol exists. Detailed, well-described protocols can facilitate the understanding and appraisal of the review methods, as well as the detection of modifications to methods and selective reporting in completed reviews (4).

Full systematic reviews (SR) and rapid reviews (RR) are two types of systematic reviews. They are often distinguished by the shorter time frame needed to produce a RR final report as well as by its less complex research topic (5): “Rapid reviews streamline traditional systematic review methods in order to synthesize evidence within a shortened timeframe” (6). As shown by Watt et al. RR did not have to be inherently inferior to SR despite “axiomatic differences” (7). He found that their conclusions did not differ much for similar research questions. However, SRs included methodologically more broader information, e.g. on economic evaluations or health service impact as well as more in-depth results, e.g. on clinical outcomes (8).

For SRs comprehensive guidance exists, e.g. based on the Cochrane Handbook (1). On the other hand, there is no standardized methodology for RRs and needs for at minimum increased transparency in reporting have been identified (5, 7).

R Rs were often considered to target specific policy questions or to be tailored to a mandate or to the intended end-users (7). Therefore, they are often performed to inform decision making or commissioned by health policy makers.

Description of format contents: PICO or according to PRISMA.



### ***Description of stakeholder involvement***

Stakeholders represent decision- and policy-makers and institutions responsible for the selection and implementation of health policies, HTAs, guidelines or end-users. Experts in the respective field are not considered as stakeholders except if they contribute in the policy-planning as described above. It is also known that stakeholders often represent more than one perspective. Concannon et al. described the 7Ps of stakeholders: patients and the public, providers, purchasers, payers, policy makers, product makers, principal investigators (9)

The U.S. EHC Program defined a “stakeholder” as a person or group with a vested interest in a particular clinical decision and the evidence that supports that decision, including:

- Patients, caregivers, and patient advocacy organizations
- Clinicians and their professional associations
- Institutional health care providers, such as hospital systems and medical clinics
- Government agencies
- Purchasers and payers, such as employers and public and private insurers
- Health care industry representatives
- Health care policymakers at the Federal, State and local levels
- Health care researchers and research institutions.

In general stakeholders might be engaged in evidence prioritization, e.g. proposing the title of a systematic review, setting research priorities, in evidence generation, such as performing trials and observational studies, in evidence synthesis, e.g. SR, RR, meta-analysis, in evidence integration, such as modeling, mapping gaps and evidence or cost effectiveness or in evidence dissemination and application, e.g. implementation formats or feedback assessment. Therefore, engagement of stakeholders may not only direct the targeted research topics but also influence the quality and dissemination of study results (9).

At what stages stakeholders can be involved in during the systematic review process? Cottrell et al. identified six categories where the systematic review might benefit: establishing credibility, anticipating controversy, ensuring transparency and accountability, improving relevance and enhancing quality as well as increasing dissemination and uptake of systematic review findings (10). Several challenges to involve stakeholders were determined. They include limited time and resources, skills of researcher to engage stakeholders, finding the right people, balancing multiple inputs and understanding the most appropriate time in the review process to engage different types of stakeholders (10). On the other hand, factors for successful stakeholder engagement included a-priori clarification of the expectations, the roles, types of activities, early engagement in the process, ongoing relationships to build trust and credibility, equality of different stakeholders, tentative inclusion of a trained facilitator and sensitivity to tight timelines (11).

Methods for identifying, selecting, contacting and engaging stakeholders might differ.

Furthermore, characteristics of stakeholders themselves are important, e.g. their intensity and modes of engagement may vary according to their interests and expectations, their roles and



1  
2  
3 their level of power and influence (11). To date there have been few efforts to measure the  
4 benefits/tradeoffs of specific stakeholder engagement processes or differing approaches to  
5 selecting and engaging differing stakeholder types (10-13).  
6  
7

8 Of all phases of the systematic review, the topic refinement and developing the key questions  
9 was repeatedly identified as the point where stakeholder engagement yielded the greatest  
10 benefit (10).  
11  
12  
13

### 14 ***Definition of health services research***

15 See Appendix 1.  
16  
17  
18

### 19 ***Relevance of this study***

20 Systematic reviews may benefit from involving stakeholders, but less is known about the  
21 practice, e.g. the proportion of involved stakeholders in recently published SRs and RRs and  
22 their type(s) and benefits of engagement in the process of a SR or RR. This information is  
23 considered to be relevant for the implementation and/or acceptance of SRs and RRs.  
24  
25  
26  
27  
28

## 29 **2. Objectives**

30 Our aims are to assess, reflect and compare the current international practice of involving  
31 stakeholders in published full systematic reviews (SR) and in rapid reviews (RR) in the field of  
32 health services research.  
33  
34  
35  
36

## 37 **3. Methods**

### 38 ***Sample size considerations***

39 Sample size considerations are guided by practical reasons and resources available. As the  
40 power of the two proportions is expected to be sufficiently high anyway, due to the big expected  
41 difference of the two proportions reporting stakeholder involvement. We consider a proportion  
42 of 0.70 for RRs and of 0.25 for SRs. This results in a minimal expected difference of 0.45.  
43  
44  
45  
46

47 Two groups with N=25 per group show an estimated power of 0.88 and an alpha of 0.023.

48 To account for potential subgroup analysis, we include a sample of N=30 systematic reviews per  
49 group, with 4 groups (SRs, RRs and Cochrane SRs, Cochrane additional database RRs). This  
50 allows us to include a maximum of six predictors in the analysis when we perform two-group  
51 comparisons.  
52  
53  
54

55 We will proceed according to the STROBE guidelines as far as they are applicable.  
56  
57  
58

### 59 ***Groups to be studied ("study population")***

60 *Full systematic reviews:*

Two groups will be studied:

1. Full systematic reviews in general: self-declaration as SR within the title or Methods section of the article or registration as such in the databases searched.
2. Cochrane systematic reviews: SRs are performed according to the Cochrane handbook (1). They are registered, supervised and released within a Cochrane Review Group. They represent the gold standard.

These two groups are selected as they are expected to differ with respect to their transparency of conduct and quality assessment.

#### *Rapid reviews:*

Rapid reviews articles will be identified on the basis of the respective self-declaration within the title, Methods section of the abstract or registration as such in the databases searched.

As there is heterogeneity regarding methodology, different terms might be used, e.g. rapid review, rapid method, rapid evidence, rapid synthesis or evidence summary.

#### *Inclusion criteria:*

- titled as systematic review or rapid review or reported as such in the objective or method section of the abstract, respectively, or registered as such in the database searched
- studies including rapid review methodology as one part of the overall study
- published between January, 2011 and December, 2015 (it is most crucial to be sure to include sufficient RRs)
- targeting a health services research topic as included in the title or abstract of the article based on the definition provided in Appendix 1

#### *Exclusion criteria:*

- designed to assess exclusively economic or cost analysis as described in the title or abstract
- performing a review or overview of reviews
- describing a protocol of a systematic review
- efficacy studies, clinical trials phases I to III, epidemiological studies to assess determinants or risk factors, economic analyses, non-human studies, establishment of databases or registries
- unclear design or description of the intervention

The inclusion and exclusion criteria are presented in Appendix 2.

#### ***Targeted stakeholders***

We will assess any kind of stakeholder involvement. In addition we will record the following groups of stakeholders:

- Institutional health care providers, such as hospitals and community services

- Government agencies
- Health care policymakers at the Federal, State and local levels

## 4. Outcomes

### *Primary outcomes:*

- to assess any kind of stakeholder involvement: yes or no
- to assess type(s) of stakeholders involved, e.g. decision- or policy-maker, experts involved in policy-planning, such as institutional health care providers or community services
- to determine phase(s)-related contribution(s) of stakeholders, e.g. developing the research question, literature search, study relevance (quality assessment), formulating or judging recommendations etc.

in recently published SRs and RRs.

### *Secondary outcomes:*

- to evaluate some potential predictors: type and topic of included studies, study population, setting (individual, population group, population, policy) and overall quality score
- to assess reported adverse effects or barriers of stakeholder involvement
- to verify stakeholder involvement
- to report publication issues, such as presence of a review protocol, institutional background of the authors, e.g. specialized in evidence synthesis, year of publication, stakeholder included as key word, dissemination information

## 5. Data collection

### *Databases to be searched:*

- The following databases will be searched:  
Biomedical/Health: Ovid Medline, Embase. Within the search strategy Cochrane SRs will be excluded.
- Cochrane library (for Cochrane SRs) and Cochrane additional databases (for RRs, e.g. DARE reviews, named as CD RR)

The search strategy will be presented in Appendix 1.

### *Selection of studies*

Following the searches in the targeted databases all results of the corresponding systematic review type (SR, RR, Cochrane SR, CD RR) will be pooled and duplicates excluded. These lists will be ordered randomly using the statistical program package R and will be exported to an excel file. The resulting lists will enter the study screening.

### ***Screening of studies***

In consecutive order, the randomly ordered references of each group of systematic reviews (SR, RR, Cochrane) will be checked for the general information and the inclusion and exclusion criteria (Appendix 2) until a total of 30 studies are included for each group.

One review authors (JF) will independently screen titles and abstracts for general information, inclusion and exclusion, cross-checked by MM. Inconsistencies or disagreement will be resolved through discussion and with consultation of another review author (MP) where necessary. The process of study selection will be carefully recorded in order to complete the PRISMA-flow diagram.

### ***Data extraction and management***

We will use a data collection form for study characteristics and outcome data which has been piloted on two reviews, one SR and one RR. One author, JF, performs full text extraction, supervised and spot-checked by a second researcher, MM. Within the full text article every step of the review will be checked for stakeholder involvement. We will resolve disagreements by consensus or by involving a third review author (MP).

Regarding Cochrane SRs, the protocol (and not the full text article) will be checked for stakeholder involvement as the protocol is relevant for performing the SR.

In addition to the screening form in Appendix 2 we will extract the following data:

- Institution performing the systematic review and contact details of the corresponding author
- Specific topic and intervention within the field of health services research
- Setting: population, population group, individual, policy; major characteristics of the population (overall N, age range or groups, sex)
- Funding for systematic review and notable conflicts of interest of authors
- Stakeholder involvement: any, number, type(s) and phase(s) of involvement, mentioned as key word
- Methodological quality assessment using the AMSTAR tool

All data will enter an Excel file.

To confirm the presented stakeholder involvement and to ask for reasons, whether benefits of stakeholder involvement were measured and about dissemination, the contact author of the included articles will be contacted by emails with pre-formulated questions. It will be indicated that this information will be used for a publication but only summarized and anonymously. Contact authors will be sent one reminder in case of missing responses.

If feasible, two experts in the field will be contacted to review and comment this protocol and to contribute to the final article in order to ensure generalizability and transparency.

We will conduct this study according to this protocol and report deviations from it in the 'Differences between protocol and review' section.

### Potential for bias conducting this overview

- selection bias, e.g. regarding year of publication, no search for grey literature
- reporting bias, e.g. incomplete reporting, no study protocol

## 6. Data analysis

There will be a narrative description of the synthesis.

We will assess the overall proportion of stakeholder involvement as well as within subgroups and according to the outcomes described. We will compare the proportion of stakeholders involved between groups using the non-parametric Wilcoxon rank sumtest.

The results of the AMSTAR assessment will be entered as a score.

### Differences between protocol and review

Will be listed if applicable.

### Conflicts of interest

None.

### Sources of support and funding

Involved authors: Jonas Feldmann (JF), Margot Mutsch (MM), Milo Alan Puhan (MP)

Internal sources

- Epidemiology, Biostatistics and Prevention Institute, University of Zurich, Zurich Switzerland

This is the host institution for the majority of the authors.

This work is part of the Master thesis of Jonas Feldmann.

## References

1. Higgins J, Green Se. Cochrane Handbook for Systematic Reviews of Interventions Version 5.1.0 [updated March 2011]. . Collaboration TC, editor. Available from <http://www.cochrane-handbook.org.2011>.
2. Khangura S, Konnyu K, Cushman R, Grimshaw J, Moher D. Evidence summaries: the evolution of a rapid review approach. *Syst Rev.* 2012;1:10.
3. Shamseer L, Moher D, Clarke M, Gherzi D, Liberati A, Petticrew M, et al. Preferred reporting items for systematic review and meta-analysis protocols (PRISMA-P) 2015: elaboration and explanation. *BMJ.* 2015;349:g7647.
4. Moher D, Shamseer L, Clarke M, Gherzi D, Liberati A, Petticrew M, et al. Preferred reporting items for systematic review and meta-analysis protocols (PRISMA-P) 2015 statement. *Syst Rev.* 2015;4:1.
5. Polisena J, Garritty C, Kamel C, Stevens A, Abou-Setta AM. Rapid review programs to support health care and policy decision making: a descriptive analysis of processes and methods. *Syst Rev.* 2015;4:26.
6. Ganann R, Ciliska D, Thomas H. Expediting systematic reviews: methods and implications of rapid reviews. *Implement Sci.* 2010;5:56.
7. Watt A, Cameron A, Sturm L, Lathlean T, Babidge W, Blamey S, et al. Rapid versus full systematic reviews: validity in clinical practice? *ANZ J Surg.* 2008;78(11):1037-40.
8. Watt A, Cameron A, Sturm L, Lathlean T, Babidge W, Blamey S, et al. Rapid reviews versus full systematic reviews: an inventory of current methods and practice in health technology assessment. *Int J Technol Assess Health Care.* 2008;24(2):133-9.
9. Concannon TW, Fuster M, Saunders T, Patel K, Wong JB, Leslie LK, et al. A systematic review of stakeholder engagement in comparative effectiveness and patient-centered outcomes research. *J Gen Intern Med.* 2014;29(12):1692-701.
10. Cottrell E, Whitlock E, Kato E, Uhl S, Belinson S, Chang C, et al. Defining the Benefits of Stakeholder Engagement in Systematic Reviews. *AHRQ Methods for Effective Health Care.* Rockville (MD)2014.
11. O'Haire C, McPheeters M, Nakamoto E, LaBrant L, Most C, Lee K, et al. Engaging Stakeholders To Identify and Prioritize Future Research Needs. *AHRQ Methods for Effective Health Care.* Rockville (MD)2011.
12. Keown K, Van Eerd D, Irvin E. Stakeholder engagement opportunities in systematic reviews: knowledge transfer for policy and practice. *J Contin Educ Health Prof.* 2008;28(2):67-72.
13. Kreis J, Puhan MA, Schunemann HJ, Dickersin K. Consumer involvement in systematic reviews of comparative effectiveness research. *Health Expect.* 2013;16(4):323-37.

## Appendix 1: Definition of health services research and search strategy (Ovid Medline)

### *Search strategy*

#### **Systematic reviews:**

- Cochrane Database: "systematic review" (title or abstract)
- Ovid Medline and Embase: "systematic review" (ti, ab), excluding "Cochrane" in title or abstract.
- No language restriction
- Published between January, 2011 and December, 2015

#### **Rapid reviews:**

- Terms: "rapid systematic review", "rapid review", "rapid evidence assessment" or "rapid health technology assessment" in title or abstract
- No language restriction
- Published between January, 2011 and December, 2015

### *Definition of health services research*

#### **No longer available:**

**Fields of health services research as defined by the Swiss Academy of Medical Sciences (SAMW)** (<http://www.samw.ch/de/Forschung/Versorgungsforschung/Kriterien.html>):

\*Adaptiert nach (Zugriff 28.11.11)

[www.bundesaerztekammer.de/page.asp?his=0.6.3289.3293.3295&all=true](http://www.bundesaerztekammer.de/page.asp?his=0.6.3289.3293.3295&all=true)

#### **Replaced by:**

Lohr KN, Steinwachs DM. Health services research: an evolving definition of the field. *Health Serv Res.* 2002;37(1):7-9. PubMed PMID: 11949927:

"Health services research is the multidisciplinary field of scientific investigation that studies how social factors, financing systems, organizational structures and processes, health technologies, and personal behaviors affect access to health care, the quality and cost of health care, and ultimately, our health and well-being. Its research domains are individuals, families, organizations, institutions, communities, and populations."

Health Technology Assessments (HTAs) targeting effectiveness as well as meta-analyses and systematic reviews for effectiveness and utility, pharmaceutical trials under everyday conditions, basic research in care-related fields, quality research, methodological developments in the field of health services research, the development and application of new technologies (e-health) and the implementation of knowledge into the clinical practice were included. We excluded studies that focused exclusively on economic or cost analyses, performed a narrative review, an overview of reviews or a protocol of a systematic review. Efficacy studies without assessing the quality of life, clinical efficacy trials phases I to III, epidemiological studies to assess determinants or risk factors, non-human studies, establishment of databases or registries, studies with unclear design or description of the intervention were also excluded.



## Appendix 2: Screening of general information and check for inclusion and exclusion

### General information

|                             |                |                      |
|-----------------------------|----------------|----------------------|
| Study ID:                   | Report ID:     | Data form completed: |
| First author:               | Year of study: | Version number:      |
| Citation:                   |                |                      |
| Publication type (specify): |                |                      |

### Inclusion and exclusion criteria

#### A) For full systematic reviews

| Inclusion criteria:                                                                                                                             | Criteria fulfilled?<br>Please tick. |    |
|-------------------------------------------------------------------------------------------------------------------------------------------------|-------------------------------------|----|
|                                                                                                                                                 | Yes                                 | No |
| Is the article titled as systematic review or designed as such in the method section of the abstract or registered as such within the database? |                                     |    |
| Is the article published (at least online) between January, 2010 and August, 2015?                                                              |                                     |    |
| Does the article investigate a health services research topic as defined by the SAMW and presented in the title or abstract?                    |                                     |    |
| Does the article assess an intervention to reduce a condition as presented in the title or abstract?                                            |                                     |    |

**To be included, all questions in the above table have to be answered with Yes.**

| Exclusion criteria:                                                                                                                                                                                                                                                                                  | Criteria fulfilled? |    |
|------------------------------------------------------------------------------------------------------------------------------------------------------------------------------------------------------------------------------------------------------------------------------------------------------|---------------------|----|
|                                                                                                                                                                                                                                                                                                      | Yes                 | No |
| Does the article investigate efficacy or describes clinical trials phases I to III, epidemiological studies to assess determinants or risk factors, non-human studies or the establishment of databases or registries as described in the title or the objective or methods section of the abstract? |                     |    |
| Does the article exclusively describe an economic assessment or cost analysis in the title or abstract?                                                                                                                                                                                              |                     |    |
| Does the article describe an overview or review of reviews within the title or abstract?                                                                                                                                                                                                             |                     |    |
| Does the article describe a protocol of a systematic review?                                                                                                                                                                                                                                         |                     |    |

|                                                           |  |  |
|-----------------------------------------------------------|--|--|
| Is the design or the intervention of the article unclear? |  |  |
|-----------------------------------------------------------|--|--|

**To be included, all questions in the above table have to be answered with No.**

### B) For rapid reviews

| Inclusion criteria:                                                                                                                                                         | Criteria fulfilled?<br>Please tick. |    |
|-----------------------------------------------------------------------------------------------------------------------------------------------------------------------------|-------------------------------------|----|
|                                                                                                                                                                             | Yes                                 | No |
| Is the article titled as rapid review, rapid method or rapid synthesis or designed as such in the method section of the abstract or registered as such within the database? |                                     |    |
| Is the article published (at least online) between January, 2010 and August, 2015?                                                                                          |                                     |    |
| Does the article investigate a health services research topic as defined by the SAMW and presented in the title or abstract?                                                |                                     |    |
| Does the article assess an intervention to reduce a condition as presented in the title or abstract?                                                                        |                                     |    |

**To be included, all questions in the above table have to be answered with Yes.**

The exclusion criteria are the same as described in A).

### C) For Cochrane systematic reviews

| Inclusion criteria:                                                                                                          | Criteria fulfilled?<br>Please tick. |    |
|------------------------------------------------------------------------------------------------------------------------------|-------------------------------------|----|
|                                                                                                                              | Yes                                 | No |
| Is the article registered and published as Cochrane systematic review within the Cochrane database?                          |                                     |    |
| Is the article published (at least online) between January, 2010 and August, 2015?                                           |                                     |    |
| Does the article investigate a health services research topic as defined by the SAMW and presented in the title or abstract? |                                     |    |
| Does the article assess an intervention to reduce a condition as presented in the title or abstract?                         |                                     |    |

**To be included, all questions in the above table have to be answered with Yes.**

The exclusion criteria are the same as described in A).

## Appendix 3: Data extraction for full text assessment

### Variables to be assessed (excel file):

- Study type (Cochrane SR, SR, RR, CD RR), Study ID, Report ID
- First study author, contact details of corresponding author, country, mail contact
- Reference citation
- Year of study (publication), version (update or first review)
- Initials of data extractor, initials of people who cross-checked extraction
- Study protocol mentioned, PRISMA checklist used
- Specific review topic, thematic focus, type of intervention, setting
- Study population: size, type, age range of participants included, sex
- Funding source, Conflict of interest statement
- Stakeholder involvement (SI): SI mentioned, SI as key word, number of stakeholders involved, types, stages involved, reasons for SI mentioned, effects of SI mentioned,
- Amstar rating, comparison of rating (Health evidence/health system evidence)

### AMSTAR – a measurement tool to assess the methodological quality of systematic reviews.

#### 1. Was an 'a priori' design provided?

The research question and inclusion criteria should be established before the conduct of the review.

*Note: Need to refer to a protocol, ethics approval, or pre-determined/a priori published research objectives to score a "yes."*

- Yes
- No
- Can't answer
- Not applicable

#### 2. Was there duplicate study selection and data extraction?

There should be at least two independent data extractors and a consensus procedure for disagreements should be in place.

*Note: 2 people do study selection, 2 people do data extraction, consensus process or one person checks the other's work.*

- Yes
- No
- Can't answer
- Not applicable

#### 3. Was a comprehensive literature search performed?

At least two electronic sources should be searched. The report must include years and databases used (e.g., Central, EMBASE, and MEDLINE). Key words and/or MESH terms must be stated and where feasible the search strategy should be provided. All searches should be supplemented by consulting current contents, reviews, textbooks, specialized registers, or experts in the particular field of study, and by reviewing the references in the studies found.

*Note: If at least 2 sources + one supplementary strategy used, select "yes" (Cochrane register/Central counts as 2 sources; a grey literature search counts as supplementary).*

- Yes
- No
- Can't answer
- Not applicable

#### 4. Was the status of publication (i.e. grey literature) used as an inclusion criterion?

The authors should state that they searched for reports regardless of their publication type. The authors should state whether or not they excluded any reports (from the systematic review), based on their publication status, language etc.

*Note: If review indicates that there was a search for "grey literature" or "unpublished literature," indicate "yes." SIGLE database, dissertations, conference proceedings, and*

trial registries are all considered grey for this purpose. If searching a source that contains both grey and non-grey, must specify that they were searching for grey/unpublished lit.

- Yes
- No
- Can't answer
- Not applicable

**5. Was a list of studies (included and excluded) provided?**

A list of included and excluded studies should be provided.

*Note: Acceptable if the excluded studies are referenced. If there is an electronic link to the list but the link is dead, select "no."*

- Yes
- No
- Can't answer
- Not applicable

**6. Were the characteristics of the included studies provided?**

In an aggregated form such as a table, data from the original studies should be provided on the participants, interventions and outcomes. The ranges of characteristics in all the studies analyzed e.g., age, race, sex, relevant socioeconomic data, disease status, duration, severity, or other diseases should be reported.

*Note: Acceptable if not in table format as long as they are described as above.*

- Yes
- No
- Can't answer
- Not applicable

**7. Was the scientific quality of the included studies assessed and documented?**

'A priori' methods of assessment should be provided (e.g., for effectiveness studies if the author(s) chose to include only randomized, double-blind, placebo controlled studies, or allocation concealment as inclusion criteria); for other types of studies alternative items will be relevant.

*Note: Can include use of a quality scoring tool or checklist, e.g., Jadad scale, risk of bias, sensitivity analysis, etc., or a description of quality items, with some kind of result for EACH study ("low" or "high" is fine, as long as it is clear which studies scored "low" and which scored "high"; a summary score/range for all studies is not acceptable).*

- Yes
- No
- Can't answer
- Not applicable

**8. Was the scientific quality of the included studies used appropriately in formulating conclusions?**

The results of the methodological rigor and scientific quality should be considered in the analysis and the conclusions of the review, and explicitly stated in formulating recommendations.

*Note: Might say something such as "the results should be interpreted with caution due to poor quality of included studies." Cannot score "yes" for this question if scored "no" for question 7.*

- Yes
- No
- Can't answer
- Not applicable

**9. Were the methods used to combine the findings of studies appropriate?**

For the pooled results, a test should be done to ensure the studies were combinable, to assess their homogeneity (i.e., Chi-squared test for homogeneity,  $I^2$ ). If heterogeneity exists a random effects model should be used and/or the clinical appropriateness of combining should be taken into consideration (i.e., is it sensible to combine?).

*Note: Indicate "yes" if they mention or describe heterogeneity, i.e., if they explain that they cannot pool because of heterogeneity/variability between interventions.*

- Yes
- No
- Can't answer
- Not applicable

**10. Was the likelihood of publication bias assessed?**

An assessment of publication bias should include a combination of graphical aids (e.g., funnel plot, other available tests) and/or statistical tests (e.g., Egger regression test, Hedges-Olken).

*Note: If no test values or funnel plot included, score "no". Score "yes" if mentions that*

1  
2  
3 *publication bias could not be assessed because there were fewer than 10 included*  
4 *studies.*

- 5  Yes  
6  No  
7  Can't answer  
8  Not applicable

9 **11. Was the conflict of interest included?**

10 Potential sources of support should be clearly acknowledged in both the systematic  
11 review and the included studies.

12 *Note: To get a "yes," must indicate source of funding or support for the systematic*  
13 *review AND for each of the included studies.*

- 14  Yes  
15  No  
16  Can't answer  
17  Not applicable

18 *Shea et al. BMC Medical Research Methodology 2007 7:10 doi:10.1186/1471-2288-7-10*

19 *Additional notes (in italics) made by Michelle Weir, Julia Worswick, and Carolyn Wayne based on*  
20 *conversations with*

21 *Bev Shea and/or Jeremy Grimshaw in June and October 2008 and July and September 2010.*  
22  
23  
24  
25  
26  
27  
28  
29  
30  
31  
32  
33  
34  
35  
36  
37  
38  
39  
40  
41  
42  
43  
44  
45  
46  
47  
48  
49  
50  
51  
52  
53  
54  
55  
56  
57  
58  
59  
60



# PRISMA 2009 Checklist

For: **Characteristics of stakeholder involvement in systematic and rapid reviews:  
a methodological review in the area of health services research**

| Section/topic                      | #  | Checklist item                                                                                                                                                                                                                                                                                                                                 | Reported on page #     |
|------------------------------------|----|------------------------------------------------------------------------------------------------------------------------------------------------------------------------------------------------------------------------------------------------------------------------------------------------------------------------------------------------|------------------------|
| <b>TITLE</b>                       |    |                                                                                                                                                                                                                                                                                                                                                |                        |
| Title                              | 1  | Identify the report as a (systematic) <a href="#">methodological</a> review, meta-analysis, or both.                                                                                                                                                                                                                                           | 1                      |
| <b>ABSTRACT</b>                    |    |                                                                                                                                                                                                                                                                                                                                                |                        |
| Structured summary                 | 2  | Provide a structured summary including, as applicable: background; objectives; data sources; study eligibility criteria, participants, and interventions; study appraisal and synthesis methods; results; limitations; conclusions and implications of key findings; systematic review registration number ( <a href="#">not applicable</a> ). | 2                      |
| <b>INTRODUCTION</b>                |    |                                                                                                                                                                                                                                                                                                                                                |                        |
| Rationale                          | 3  | Describe the rationale for the review in the context of what is already known.                                                                                                                                                                                                                                                                 | 5                      |
| Objectives                         | 4  | Provide an explicit statement of questions being addressed with reference to participants, interventions, comparisons, outcomes, and study design (PICOS). <a href="#">Methodological assessment, no intervention</a>                                                                                                                          | 5-6                    |
| <b>METHODS</b>                     |    |                                                                                                                                                                                                                                                                                                                                                |                        |
| Protocol and registration          | 5  | Indicate if a review protocol exists, if and where it can be accessed (e.g., Web address), and, if available, provide registration information including registration number.                                                                                                                                                                  | 6                      |
| Eligibility criteria               | 6  | Specify study characteristics (e.g., PICOS, length of follow-up) and report characteristics (e.g., years considered, language, publication status) used as criteria for eligibility, giving rationale.                                                                                                                                         | 7-8                    |
| Information sources                | 7  | Describe all information sources (e.g., databases with dates of coverage, contact with study authors to identify additional studies) in the search and date last searched.                                                                                                                                                                     | 6-7                    |
| Search                             | 8  | Present full electronic search strategy for at least one database, including any limits used, such that it could be repeated.                                                                                                                                                                                                                  | Suppl. File S3a and 3b |
| Study selection                    | 9  | State the process for selecting studies (i.e., screening, eligibility, included in systematic review, and, if applicable, included in the meta-analysis).                                                                                                                                                                                      | 7-8                    |
| Data collection process            | 10 | Describe method of data extraction from reports (e.g., piloted forms, independently, in duplicate) and any processes for obtaining and confirming data from investigators.                                                                                                                                                                     | 7                      |
| Data items                         | 11 | List and define all variables for which data were sought (e.g., PICOS, funding sources) and any assumptions and simplifications made.                                                                                                                                                                                                          | 8-9                    |
| Risk of bias in individual studies | 12 | Describe methods used for assessing risk of bias of individual studies (including specification of whether this was done at the <a href="#">Study or outcome level</a> ), and how this information is to be used in any data synthesis.                                                                                                        | n/a<br>AMSTAR for      |

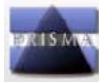

# PRISMA 2009 Checklist

For: **Characteristics of stakeholder involvement in systematic and rapid reviews:  
a methodological review in the area of health services research**

|                      |    |                                                                                                                                                           |                                              |
|----------------------|----|-----------------------------------------------------------------------------------------------------------------------------------------------------------|----------------------------------------------|
|                      |    |                                                                                                                                                           | methodological quality                       |
| Summary measures     | 13 | State the principal summary measures (e.g., risk ratio, difference in means).                                                                             | Stakeholder involvement per review type in % |
| Synthesis of results | 14 | Describe the methods of handling data and combining results of studies, if done, including measures of consistency (e.g., $I^2$ ) for each meta-analysis. | No meta-analysis                             |

Page 1 of 2

| Section/topic                 | #  | Checklist item                                                                                                                                                                                                                                                      | Reported on page #                      |
|-------------------------------|----|---------------------------------------------------------------------------------------------------------------------------------------------------------------------------------------------------------------------------------------------------------------------|-----------------------------------------|
| Risk of bias across studies   | 15 | Specify any assessment of risk of bias that may affect the cumulative evidence (e.g., publication bias, selective reporting within studies).                                                                                                                        | Reporting bias 19                       |
| Additional analyses           | 16 | Describe methods of additional analyses (e.g., sensitivity or subgroup analyses, meta-regression), if done, indicating which were pre-specified.                                                                                                                    | Not applicable                          |
| <b>RESULTS</b>                |    |                                                                                                                                                                                                                                                                     |                                         |
| Study selection               | 17 | Give numbers of studies screened, assessed for eligibility, and included in the review, with reasons for exclusions at each stage, ideally with a flow diagram.                                                                                                     | Figure 1                                |
| Study characteristics         | 18 | For each study, present characteristics for which data were extracted (e.g., study size, PICOS, follow-up period) and provide the citations.                                                                                                                        | Supplementary File S4 (part, AMSTAR)    |
| Risk of bias within studies   | 19 | Present data on risk of bias of each study and, if available, any outcome level assessment (see item 12).                                                                                                                                                           | AMSTAR (methodological characteristics) |
| Results of individual studies | 20 | For all outcomes considered (benefits or harms), present, for each study: (a) simple summary data for each intervention group (b) effect estimates and confidence intervals, ideally with a forest plot.                                                            | Not applicable                          |
| Synthesis of results          | 21 | Present results of each meta-analysis done, including confidence intervals and measures of consistency.                                                                                                                                                             | Not applicable                          |
| Risk of bias across studies   | 22 | Present results of any assessment of risk of bias across studies (see Item 15).                                                                                                                                                                                     |                                         |
| Additional analysis           | 23 | Give results of additional analyses, if done (e.g., sensitivity or subgroup analyses, meta-regression [see Item 16]).<br>For peer review only - <a href="http://bmjopen.bmj.com/site/about/guidelines.xhtml">http://bmjopen.bmj.com/site/about/guidelines.xhtml</a> | Not applicable                          |



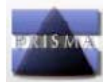

# PRISMA 2009 Checklist

For: **Characteristics of stakeholder involvement in systematic and rapid reviews:  
a methodological review in the area of health services research**

| DISCUSSION          |    |                                                                                                                                                                                      |       |
|---------------------|----|--------------------------------------------------------------------------------------------------------------------------------------------------------------------------------------|-------|
| Summary of evidence | 24 | Summarize the main findings including the strength of evidence for each main outcome; consider their relevance to key groups (e.g., healthcare providers, users, and policy makers). | 19-20 |
| Limitations         | 25 | Discuss limitations at study and outcome level (e.g., risk of bias), and at review-level (e.g., incomplete retrieval of identified research, reporting bias).                        | 19-22 |
| Conclusions         | 26 | Provide a general interpretation of the results in the context of other evidence, and implications for future research.                                                              | 23    |
| FUNDING             |    |                                                                                                                                                                                      |       |
| Funding             | 27 | Describe sources of funding for the systematic review and other support (e.g., supply of data); role of funders for the systematic review.                                           | 23    |

From: Moher D, Liberati A, Tetzlaff J, Altman DG, The PRISMA Group (2009). Preferred Reporting Items for Systematic Reviews and Meta-Analyses: The PRISMA Statement. PLoS Med 6(7): e1000097. doi:10.1371/journal.pmed1000097

For more information, visit: [www.prisma-statement.org](http://www.prisma-statement.org).

Page 2 of 2



Thursday, October 22, 2015 6:29:28 AM

1  
2  
3  
4  
5  
6  
7  
8  
9  
10  
11  
12  
13  
14  
15  
16  
17  
18  
19  
20  
21  
22  
23  
24  
25  
26  
27  
28  
29  
30  
31  
32  
33  
34  
35  
36  
37  
38  
39  
40  
41  
42  
43  
44  
45  
46  
47  
48  
49  
50  
51  
52  
53  
54  
55  
56  
57  
58  
59  
60

| Query                                                                     | Limiters/Expanders                                                                                     | Last Run Via                                                                                            | Results |
|---------------------------------------------------------------------------|--------------------------------------------------------------------------------------------------------|---------------------------------------------------------------------------------------------------------|---------|
| AB "systematic review"<br>OR TI "systematic<br>review" NOT AB<br>cochrane | Limiters - Date of<br>Publication: 20110101-<br>20151231<br>Search modes - Find all<br>my search terms | Interface - EBSCOhost<br>Research Databases<br>Search Screen - Advanced<br>Search<br>Database - MEDLINE | 38,740  |
| AB "systematic review"<br>OR TI "systematic<br>review"                    | Limiters - Date of<br>Publication: 20110101-<br>20151231<br>Search modes - Find all<br>my search terms | Interface - EBSCOhost<br>Research Databases<br>Search Screen - Advanced<br>Search<br>Database - MEDLINE | 42,718  |

## Embase Session Results

| No. | Query                                                                                                                                                                                                                                                                                                                                     | Results |
|-----|-------------------------------------------------------------------------------------------------------------------------------------------------------------------------------------------------------------------------------------------------------------------------------------------------------------------------------------------|---------|
| #13 | 'rapid systematic review' OR 'rapid review' OR 'rapid evidence assessment' OR 'rapid health technology assessment' OR 'rapid assessment':ab,ti AND [2011-2015]/py                                                                                                                                                                         | 1,343   |
| #12 | 'rapid systematic review' OR 'rapid review' OR 'rapid evidence assessment' OR 'rapid health technology assessment':ab,ti AND [2011-2015]/py                                                                                                                                                                                               | 188     |
| #11 | 'rapid systematic review' OR 'rapid review' OR 'rapid evidence assessment' OR 'rapid health technology assessment' OR 'brief review':ab,ti AND [2011-2015]/py                                                                                                                                                                             | 3,710   |
| #10 | 'rapid systematic review' OR 'rapid review' OR 'rapid evidence assessment' OR 'rapid evidence' OR 'rapid health technology assessment' OR 'evidence brief' OR 'evidence summary' OR 'brief review':ab,ti AND [2011-2015]/py                                                                                                               | 3,801   |
| #9  | 'rapid assessment' OR 'rapid systematic review' OR 'rapid review' OR 'rapid evidence assessment' OR 'rapid evidence' OR 'rapid health technology assessment' OR 'evidence brief' OR 'evidence summary' OR 'brief review':ab,ti AND [2011-2015]/py                                                                                         | 4,977   |
| #8  | 'rapid assessment' OR 'rapid systematic review' OR 'rapid review' OR 'rapid evidence assessment' OR 'rapid evidence' OR 'rapid synthesis' OR 'rapid health technology assessment' OR 'evidence brief' OR 'evidence summary' OR 'brief review':ab,ti AND [2011-2015]/py                                                                    | 5,372   |
| #7  | 'rapid assessment' OR 'rapid systematic review' OR 'rapid review' OR 'rapid evidence assessment' OR 'rapid method' OR 'rapid evidence' OR 'rapid synthesis' OR 'rapid health technology assessment' OR 'evidence brief' OR 'evidence summary' OR 'brief review':ab,ti AND [2011-2015]/py                                                  | 7,285   |
| #6  | rapid AND (assessment OR 'systematic review'/exp OR 'systematic review' OR 'evidence assessment' OR 'health technology assessment' OR 'method'/exp OR method OR 'review'/exp OR review OR evidence OR 'synthesis'/exp OR synthesis) OR 'brief review' OR 'evidence brief' OR 'evidence summary':ab,ti AND [embase]/lim AND [2011-2015]/py | 143,957 |



© 2015 Reed Elsevier Properties SA. All rights reserved.

Embase is a registered trademark of Reed Elsevier Properties SA, used under license.

Tabelle 1

### Characteristics of stakeholder involvement in systematic and rapid reviews: Data extraction: AMSTAR ratings

| Type<br>(SR, RR,<br>CRD<br>RR)     | Study ID | Year of<br>study | Citation                                                                                                                                                                                                                                                        | AMSTAR assessment  |                                 |                                                                                                                                            |                                                                                                                                               |
|------------------------------------|----------|------------------|-----------------------------------------------------------------------------------------------------------------------------------------------------------------------------------------------------------------------------------------------------------------|--------------------|---------------------------------|--------------------------------------------------------------------------------------------------------------------------------------------|-----------------------------------------------------------------------------------------------------------------------------------------------|
|                                    |          |                  |                                                                                                                                                                                                                                                                 | Review<br>protocol | A priori<br>design<br>provided? | Was there duplicate<br>study selection and<br>data extraction? (at<br>least two independent<br>data extractors and<br>consensus procedure) | Comprehensive<br>literature search<br>performed? (at least two<br>electronic sources,<br>reports must include<br>years and databases<br>used) |
| <b>Cochrane systematic reviews</b> |          |                  |                                                                                                                                                                                                                                                                 |                    |                                 |                                                                                                                                            |                                                                                                                                               |
| CSR                                | 101      | 2012             | Olsen O, Clausen JA. Planned hospital birth versus planned home birth. Cochrane Database of Systematic Reviews 2012, Issue 9. Art. No.: CD000352. DOI: 10.1002/14651858.CD000352.pub2.                                                                          | yes                | 1                               | 1                                                                                                                                          | 1                                                                                                                                             |
| CSR                                | 102      | 2013             | Moi JHY, Sriranganathan MK, Edwards CJ, Buchbinder R. Lifestyle interventions for acute gout. Cochrane Database of Systematic Reviews 2013, Issue 11. Art. No.: CD010519. DOI: 10.1002/14651858.CD010519.pub2.                                                  | yes                | 1                               | 1                                                                                                                                          | 1                                                                                                                                             |
| CSR                                | 103      | 2011             | Thomas RE, Lorenzetti D, Spragins W. Mentoring adolescents to prevent drug and alcohol use. Cochrane Database of Systematic Reviews 2011, Issue 11. Art. No.: CD007381. DOI: 10.1002/14651858.CD007381.pub2.                                                    | yes                | 1                               | 1                                                                                                                                          | 1                                                                                                                                             |
| CSR                                | 104      | 2012             | Garrison SR, Allan GM, Sekhon RK, Musini VM, Khan KM. Magnesium for skeletal muscle cramps. Cochrane Database of Systematic Reviews 2012, Issue 9. Art. No.: CD009402. DOI: 10.1002/14651858.CD009402.pub2.                                                     | yes                | 1                               | 1                                                                                                                                          | 1                                                                                                                                             |
| CSR                                | 105      | 2012             | Tejani AM, Wasdell M, Spiwak R, Rowell G, Nathwani S. Carnitine for fatigue in multiple sclerosis. Cochrane Database of Systematic Reviews 2012, Issue 5. Art. No.: CD007280. DOI: 10.1002/14651858.CD007280.pub3.                                              | yes                | 1                               | 1                                                                                                                                          | 1                                                                                                                                             |
| CSR                                | 106      | 2013             | Taylor F, Huffman MD, Macedo AF, Moore THM, Burke M, Davey Smith G, Ward K, Ebrahim S. Statins for the primary prevention of cardiovascular disease. Cochrane Database of Systematic Reviews 2013, Issue 1. Art. No.: CD004816. DOI: 10.1002/14651858.CD004816. | yes                | 1                               | 1                                                                                                                                          | 1                                                                                                                                             |
| CSR                                | 107      | 2013             | Jorge EC, Jorge EN, El Dib RP. Early light reduction for preventing retinopathy of prematurity in very low birth weight infants. Cochrane Database of Systematic Reviews 2013, Issue 8. Art. No.: CD000122. DOI: 10.1002/14651858.CD000122.pub2.                | yes                | 1                               | 1                                                                                                                                          | 1                                                                                                                                             |
| CSR                                | 108      | 2012             | Jin H, Leng Q, Li C. Dietary flavonoid for preventing colorectal neoplasms. Cochrane Database of Systematic Reviews 2012, Issue 8. Art. No.: CD009350. DOI: 10.1002/14651858.CD009350.pub2.                                                                     | yes                | 1                               | 1                                                                                                                                          | 1                                                                                                                                             |
| CSR                                | 109      | 2014             | Karmali KN, Davies P, Taylor F, Beswick A, Martin N, Ebrahim S. Promoting patient uptake and adherence in cardiac rehabilitation. Cochrane Database of Systematic Reviews 2014, Issue 6. Art. No.: CD007131. DOI: 10.1002/14651858.CD007131.pub3.               | yes                | 1                               | 1                                                                                                                                          | 1                                                                                                                                             |

Tabelle1

| Status of publication used as inclusion criterion? (search for grey or unpublished literature?) | List of studies provided? (excluded studies referenced?) | Characteristics of included studies provided? | Scientific quality of included studies assessed and documented? (methods provided) | Scientific quality of included studies used appropriately in formulating conclusions? | Methods used to combine findings of studies appropriate? (mentions or describes heterogeneity?) | Likelihood of publication bias assessed? (graphical aids and/or statistical tests) | Conflict of interest included? | Final Score | Grouping of scores (strong: ≥8=2; moderate: 4-7=1; weak <4=0) | health evidence / health systems evidence platforms |
|-------------------------------------------------------------------------------------------------|----------------------------------------------------------|-----------------------------------------------|------------------------------------------------------------------------------------|---------------------------------------------------------------------------------------|-------------------------------------------------------------------------------------------------|------------------------------------------------------------------------------------|--------------------------------|-------------|---------------------------------------------------------------|-----------------------------------------------------|
| 1                                                                                               | 1                                                        | 1                                             | 1                                                                                  | 1                                                                                     | 1                                                                                               | 1                                                                                  | 1                              | 11          | 2                                                             | 6/9                                                 |
| 1                                                                                               | 1                                                        | 1                                             | 1                                                                                  | 1                                                                                     | 1                                                                                               | 1                                                                                  | 1                              | 11          | 2                                                             | not found                                           |
| 1                                                                                               | 1                                                        | 1                                             | 1                                                                                  | 1                                                                                     | 1                                                                                               | 1                                                                                  | 1                              | 11          | 2                                                             | 9 (strong)                                          |
| 1                                                                                               | 1                                                        | 1                                             | 1                                                                                  | 1                                                                                     | 1                                                                                               | 1                                                                                  | 1                              | 11          | 2                                                             | not found                                           |
| 1                                                                                               | 1                                                        | 1                                             | 1                                                                                  | 1                                                                                     | 1 na                                                                                            | 1                                                                                  | 1                              | 10          | 2                                                             | not found                                           |
| 1                                                                                               | 1                                                        | 1                                             | 1                                                                                  | 1                                                                                     | 1                                                                                               | 1                                                                                  | 1                              | 11          | 2                                                             | not found                                           |
| 1                                                                                               | 1                                                        | 1                                             | 1                                                                                  | 1                                                                                     | 1                                                                                               | 1                                                                                  | 1                              | 11          | 2                                                             | not found                                           |
| 1                                                                                               | 1                                                        | 1                                             | 1                                                                                  | 1                                                                                     | 1                                                                                               | 1                                                                                  | 1                              | 11          | 2                                                             | not found                                           |
| 1                                                                                               | 1                                                        | 1                                             | 1                                                                                  | 1                                                                                     | 1                                                                                               | 1                                                                                  | 1                              | 11          | 2                                                             | 9/10                                                |

Tabelle1

|    |     |     |      |                                                                                              |     |   |   |   |
|----|-----|-----|------|----------------------------------------------------------------------------------------------|-----|---|---|---|
| 1  |     |     |      |                                                                                              |     |   |   |   |
| 2  |     |     |      |                                                                                              |     |   |   |   |
| 3  |     |     |      |                                                                                              |     |   |   |   |
| 4  |     |     |      | Bjelakovic G, Gluud LL, Nikolova D, Whitfield K, Krstic G, Wetterslev J, Gluud C. Vitamin D  |     |   |   |   |
| 5  | CSR | 110 | 2014 | supplementation for prevention of cancer in adults. Cochrane Database of Systematic          | yes | 1 | 1 | 1 |
| 6  |     |     |      | Reviews 2014, Issue 6. Art. No.: CD007469. DOI: 10.1002/14651858.CD007469.pub2.              |     |   |   |   |
| 7  |     |     |      |                                                                                              |     |   |   |   |
| 8  | CSR | 111 | 2014 | Carney T, Myers BJ, Louw J, Okwundu CI. Brief school-based interventions and                 | yes | 1 | 1 | 1 |
| 9  |     |     |      | behavioural outcomes for substance-using adolescents. Cochrane Database of Systematic        |     |   |   |   |
| 10 |     |     |      | Reviews 2014, Issue 2. Art. No.: CD008969. DOI: 10.1002/14651858.CD008969.pub2.              |     |   |   |   |
| 11 | CSR | 112 | 2013 | Taylor MJ, Rudkin L, Bullemor-Day P, Lubin J, Chukwujekwu C, Hawton K. Strategies for        | yes | 1 | 1 | 1 |
| 12 |     |     |      | managing sexual dysfunction induced by antidepressant medication. Cochrane Database          |     |   |   |   |
| 13 |     |     |      | of Systematic Reviews 2013, Issue 5. Art. No.: CD003382. DOI:                                |     |   |   |   |
| 14 | CSR | 113 | 2012 | 10.1002/14651858.CD0033                                                                      | yes | 1 | 1 | 1 |
| 15 |     |     |      |                                                                                              |     |   |   |   |
| 16 | CSR | 114 | 2012 | Fonner VA, Denison J, Kennedy CE, O'Reilly K, Sweat M. Voluntary counseling and testing      | yes | 1 | 1 | 1 |
| 17 |     |     |      | (VCT) for changing HIV-related risk behavior in developing countries. Cochrane Database      |     |   |   |   |
| 18 |     |     |      | of Systematic Reviews 2012, Issue 9. Art. No.: CD001224. DOI: 10.1002/14651858.              |     |   |   |   |
| 19 | CSR | 115 | 2014 | Shields L, Zhou H, Pratt J, Taylor M, Hunter J, Pascoe E. Family-centred care for            | yes | 1 | 1 | 1 |
| 20 |     |     |      | hospitalised children aged 0-12 years. Cochrane Database of Systematic Reviews 2012,         |     |   |   |   |
| 21 |     |     |      | Issue 10. Art. No.: CD004811. DOI: 10.1002/14651858.CD004811.pub3.                           |     |   |   |   |
| 22 | CSR | 116 | 2013 | Nava F, Ghilotti F, Maggi L, Hatemi G, Del Bianco A, Merlo C, Filippini G, Tramacere I.      | yes | 1 | 1 | 1 |
| 23 |     |     |      | Biologics, colchicine, corticosteroids, immunosuppressants and interferon-alpha for Neuro-   |     |   |   |   |
| 24 |     |     |      | Behçet's Syndrome. Cochrane Database of Systematic Reviews 2014, Issue 12. Ar                |     |   |   |   |
| 25 | CSR | 117 | 2014 | Njei B, Kongnyuy EJ, Kumar S, Okwen MP, Sankar MJ, Mbuagbaw L. Optimal timing for            | yes | 1 | 1 | 1 |
| 26 |     |     |      | antiretroviral therapy initiation in patients with HIV infection and concurrent cryptococcal |     |   |   |   |
| 27 |     |     |      | meningitis. Cochrane Database of Systematic Reviews 2013, Issue 2. Art. No.: CD0             |     |   |   |   |
| 28 | CSR | 118 | 2013 | 10.1002/14651858.CD007796                                                                    | yes | 1 | 1 | 1 |
| 29 |     |     |      |                                                                                              |     |   |   |   |
| 30 | CSR | 119 | 2011 | Lager KE, Mistri AK, Khunti K, Haunton VJ, Sett AK, Wilson AD. Interventions for             | yes | 1 | 1 | 1 |
| 31 |     |     |      | improving modifiable risk factor control in the secondary prevention of stroke. Cochrane     |     |   |   |   |
| 32 |     |     |      | Database of Systematic Reviews 2014, Issue 5. Art. No.: CD009103. DOI: 10.1002/146518        |     |   |   |   |
| 33 | CSR | 120 | 2012 | 5. Art. No.: CD009103. DOI: 10.1002/14651858.CD009103                                        | yes | 1 | 1 | 1 |
| 34 |     |     |      | Chen W, Zhang Y, Li X, Yang G, Liu JP. Chinese herbal medicine for diabetic peripheral       |     |   |   |   |
| 35 |     |     |      | neuropathy. Cochrane Database of Systematic Reviews 2013, Issue 10. Art. No.:                |     |   |   |   |
| 36 | CSR | 121 | 2011 | CD007796. DOI: 10.1002/14651858.CD007796.pub3.                                               | yes | 1 | 1 | 1 |
| 37 |     |     |      |                                                                                              |     |   |   |   |
| 38 | CSR | 122 | 2011 | Fede G, Germani G, Gluud C, Gurusamy KS, Burroughs AK. Propylthiouracil for alcoholic        | yes | 1 | 1 | 1 |
| 39 |     |     |      | liver disease. Cochrane Database of Systematic Reviews 2011, Issue 6. Art. No.:              |     |   |   |   |
| 40 |     |     |      | CD002800. DOI: 10.1002/14651858.CD002800.pub3.                                               |     |   |   |   |
| 41 | CSR | 120 | 2012 | Jefferson T, Rivetti A, Di Pietrantonj C, Demicheli V, Ferroni E. Vaccines for preventing    | yes | 1 | 1 | 1 |
| 42 |     |     |      | influenza in healthy children. Cochrane Database of Systematic Reviews 2012, Issue 8.        |     |   |   |   |
| 43 |     |     |      | Art. No.: CD004879. DOI: 10.1002/14651858.CD004879.pub4.                                     |     |   |   |   |
| 44 | CSR | 121 | 2011 | Akl EA, Oxman AD, Herrin J, Vist GE, Terrenato I, Sperati F, Costiniuk C, Blank D,           | yes | 1 | 1 | 1 |
| 45 |     |     |      | Schünemann H. Framing of health information messages. Cochrane Database of                   |     |   |   |   |
| 46 |     |     |      | Systematic Reviews 2011, Issue 12. Art. No.: CD006777. DOI:                                  |     |   |   |   |

Tabelle1

|    |   |      |    |    |    |    |   |   |   |    |   |             |
|----|---|------|----|----|----|----|---|---|---|----|---|-------------|
| 1  |   |      |    |    |    |    |   |   |   |    |   |             |
| 2  |   |      |    |    |    |    |   |   |   |    |   |             |
| 3  |   |      |    |    |    |    |   |   |   |    |   |             |
| 4  |   |      |    |    |    |    |   |   |   |    |   |             |
| 5  | 1 | 1    | 1  | 1  | 1  | 1  | 1 | 1 | 1 | 11 | 2 | 9 (strong)  |
| 6  |   |      |    |    |    |    |   |   |   |    |   |             |
| 7  |   |      |    |    |    |    |   |   |   |    |   |             |
| 8  | 1 | 1    | 1  | 1  | 1  | 1  | 1 | 1 | 1 | 11 | 2 | 10 (strong) |
| 9  |   |      |    |    |    |    |   |   |   |    |   |             |
| 10 |   |      |    |    |    |    |   |   |   |    |   |             |
| 11 | 1 | 1    | 1  | 1  | 1  | 1  | 1 | 1 | 1 | 11 | 2 | not found   |
| 12 |   |      |    |    |    |    |   |   |   |    |   |             |
| 13 |   |      |    |    |    |    |   |   |   |    |   |             |
| 14 | 1 | 1    | 1  | 1  | 1  | 1  | 1 | 1 | 1 | 11 | 2 | 10/11       |
| 15 |   |      |    |    |    |    |   |   |   |    |   |             |
| 16 |   |      |    |    |    |    |   |   |   |    |   |             |
| 17 | 1 | 1    | 1  | 1  | 1  | na |   | 1 | 1 | 10 | 2 | 9/10        |
| 18 |   |      |    |    |    |    |   |   |   |    |   |             |
| 19 | 1 | 1 na | na | na | na |    |   | 1 | 1 | 7  | 1 | not found   |
| 20 |   |      |    |    |    |    |   |   |   |    |   |             |
| 21 | 1 | 1    | 1  | 1  | 1  | 1  | 1 | 1 | 1 | 11 | 2 | not found   |
| 22 |   |      |    |    |    |    |   |   |   |    |   |             |
| 23 |   |      |    |    |    |    |   |   |   |    |   |             |
| 24 | 1 | 1    | 1  | 1  | 1  | 1  | 1 | 1 | 1 | 11 | 2 | not found   |
| 25 |   |      |    |    |    |    |   |   |   |    |   |             |
| 26 |   |      |    |    |    |    |   |   |   |    |   |             |
| 27 | 1 | 1    | 1  | 1  | 1  | 1  | 1 | 1 | 1 | 11 | 2 | not found   |
| 28 |   |      |    |    |    |    |   |   |   |    |   |             |
| 29 | 1 | 1    | 1  | 1  | 1  | 1  | 1 | 1 | 1 | 11 | 2 | not found   |
| 30 |   |      |    |    |    |    |   |   |   |    |   |             |
| 31 |   |      |    |    |    |    |   |   |   |    |   |             |
| 32 | 1 | 1    | 0  | 1  | 1  | 1  | 1 | 1 | 1 | 10 | 2 | 10 (strong) |
| 33 |   |      |    |    |    |    |   |   |   |    |   |             |
| 34 |   |      |    |    |    |    |   |   |   |    |   | 10/11 & 9   |
| 35 | 1 | 1    | 1  | 1  | 1  | 1  | 1 | 1 | 1 | 11 | 2 | (strong)    |
| 36 |   |      |    |    |    |    |   |   |   |    |   |             |
| 37 | 1 | 1 na | na | na | na |    |   | 1 | 1 | 7  | 1 | not found   |
| 38 |   |      |    |    |    |    |   |   |   |    |   |             |
| 39 |   |      |    |    |    |    |   |   |   |    |   |             |
| 40 |   |      |    |    |    |    |   |   |   |    |   |             |
| 41 |   |      |    |    |    |    |   |   |   |    |   |             |
| 42 |   |      |    |    |    |    |   |   |   |    |   |             |
| 43 |   |      |    |    |    |    |   |   |   |    |   |             |
| 44 |   |      |    |    |    |    |   |   |   |    |   |             |
| 45 |   |      |    |    |    |    |   |   |   |    |   |             |
| 46 |   |      |    |    |    |    |   |   |   |    |   |             |



Tabelle1

|                                          |     |      |                                                                                                                                                                                                                                                                 |                     |   |   |   |  |
|------------------------------------------|-----|------|-----------------------------------------------------------------------------------------------------------------------------------------------------------------------------------------------------------------------------------------------------------------|---------------------|---|---|---|--|
| CSR                                      | 123 | 2011 | Cheuk DKL, Chiang AKS, Lee TL, Chan GCF, Ha SY. Vaccines for prophylaxis of viral infections in patients with hematological malignancies. Cochrane Database of Systematic Reviews 2011, Issue 3. Art. No.: CD006505. DOI: 10.1002/14651858.CD006505.pub2.       | yes                 | 1 | 1 | 1 |  |
| CSR                                      | 124 | 2015 | Kwong JSW, Lau HLC, Yeung F, Chau PH. Yoga for secondary prevention of coronary heart disease. Cochrane Database of Systematic Reviews 2015, Issue 7. Art. No.: CD009506. DOI: 10.1002/14651858.CD009506.pub4.                                                  | yes                 | 1 | 1 | 1 |  |
| CSR                                      | 125 | 2015 | Overdevest GM, Jacobs W, Vleggeert-Lankamp C, Thomé C, Gunzburg R, Peul W. Effectiveness of posterior decompression techniques compared with conventional laminectomy for lumbar stenosis. Cochrane Database of Systematic Reviews 2015, Issue 3. Art. No.: CD0 | yes                 | 1 | 1 | 1 |  |
| CSR                                      | 126 | 2014 | Marti-Carvajal AJ, Knight-Madden JM, Martinez-Zapata MJ. Interventions for treating leg ulcers in people with sickle cell disease. Cochrane Database of Systematic Reviews 2014, Issue 12. Art. No.: CD008394. DOI: 10.1002/14651858.CD008394.pub3.             | yes                 | 1 | 1 | 1 |  |
| CSR                                      | 127 | 2014 | Junker AE, Als-Nielsen B, Gluud C, Gluud LL. Dopamine agents for hepatic encephalopathy. Cochrane Database of Systematic Reviews 2014, Issue 2. Art. No.: CD003047. DOI: 10.1002/14651858.CD003047.pub3.                                                        | yes                 | 1 | 1 | 1 |  |
| CSR                                      | 128 | 2013 | Peckham EJ, Nelson EA, Greenhalgh J, Cooper K, Roberts ER, Agrawal A. Homeopathy for treatment of irritable bowel syndrome. Cochrane Database of Systematic Reviews 2013, Issue 11. Art. No.: CD009710. DOI: 10.1002/14651858.CD009710.pub2.                    | yes                 | 1 | 1 | 1 |  |
| CSR                                      | 129 | 2013 | Okwundu CI, Nagpal S, Musekiwa A, Sinclair D. Home- or community-based programmes for treating malaria. Cochrane Database of Systematic Reviews 2013, Issue 5. Art. No.: CD009527. DOI: 10.1002/14651858.CD009527.pub2.                                         | yes                 | 1 | 1 | 1 |  |
| CSR                                      | 130 | 2013 | Rahimi-Movaghar A, Amin-Esmaili M, Hefazi M, Yousefi-Nooraie R. Pharmacological therapies for maintenance treatments of opium dependence. Cochrane Database of Systematic Reviews 2013, Issue 1. Art. No.: CD007775. DOI: 10.1002/14651858.CD007775.pub2.       | yes                 | 1 | 1 | 1 |  |
| <b>Systematic reviews (non-Cochrane)</b> |     |      |                                                                                                                                                                                                                                                                 |                     |   |   |   |  |
| SR                                       | 131 | 2015 | Rush CJ, Campbell RT, Jhund PS, et al. Falling cardiovascular mortality in heart failure with reduced ejection fraction and implications for clinical trials. JACC Heart Fail. 2015;3(8):603–14.                                                                | none mentioned      | 1 | 1 | 1 |  |
| SR                                       | 132 | 2015 | Foersch M, Jacobs C, Wriedt S, Hechtner M, Wehrbein H. Effectiveness of maxillary protraction using facemask with or without maxillary expansion: a systematic review and meta-analysis. Clinical Oral Investigations [serial online]. July 2015;19(6):1181-119 | yes                 | 1 | 1 | 1 |  |
| SR                                       | 133 | 2015 | Sipe TA, Finnie RKC, Knopf JA, et al. Effects of mental health benefits legislation: A Community Guide systematic review. Am J Prev Med. 2015;48(6):755–766.                                                                                                    | yes (not mentioned) | 1 | 1 | 1 |  |
| SR                                       | 134 | 2013 | A.A. Ahmed, E. Alsharief, A. Alsharief, Intensive versus conventional glycemetic control: what is best for patients with type 2 diabetes? Diabetes Metab Syndr, 7 (2013), pp. 48–51                                                                             | none mentioned      | 1 | 1 | 1 |  |
| SR                                       | 135 | 2012 | M. Panagioti, P.A. Gooding, N. Tarrier A meta-analysis of the association between posttraumatic stress disorder and suicidality: the role of comorbid depression; Compr. Psychiatry, 53 (2012), pp. 915–930                                                     | none mentioned      | 1 | 1 | 1 |  |
| SR                                       | 136 | 2015 | Z. Wang Age-dependent decline of association between obesity and mortality: a systematic review and meta-analysis Obes Res Clin Pract, 9 (2015), pp. 1–11                                                                                                       | yes (not mentioned) | 1 | 1 | 1 |  |
| SR                                       | 137 | 2015 | E. Rolka A systematic review of music and dyslexia, The Arts in Psychotherapy, 46 (2015), pp 24-32                                                                                                                                                              | no                  | 1 | 1 | 1 |  |

Tabelle1

1  
2  
3  
4  
5  
6  
7  
8  
9  
10  
11  
12  
13  
14  
15  
16  
17  
18  
19  
20  
21  
22  
23  
24  
25  
26  
27  
28  
29  
30  
31  
32  
33  
34  
35  
36  
37  
38  
39  
40  
41  
42  
43  
44  
45  
46

|    |   |      |    |    |    |   |   |   |   |    |   |                   |
|----|---|------|----|----|----|---|---|---|---|----|---|-------------------|
| 1  | 1 | 1    | 1  | 1  | 1  | 1 | 1 | 1 | 1 | 11 | 2 | not found         |
| 2  | 1 | 1 na | na | na | na |   |   | 1 | 1 | 7  | 1 | 9 (strong)        |
| 3  | 1 | 1    | 1  | 1  | 1  | 1 | 1 | 1 | 1 | 11 | 2 | not found         |
| 4  | 1 | 1    | 1  | 1  | 1  | 1 | 1 | 1 | 1 | 11 | 2 | not found         |
| 5  | 1 | 1    | 1  | 1  | 1  | 1 | 1 | 1 | 1 | 11 | 2 | not found         |
| 6  | 1 | 1    | 1  | 1  | 1  | 1 | 1 | 1 | 1 | 11 | 2 | not found         |
| 7  | 1 | 1    | 0  | 1  | 1  | 1 | 1 | 1 | 1 | 10 | 2 | 10/10             |
| 8  | 1 | 1    | 1  | 1  | 1  | 1 | 1 | 1 | 1 | 11 | 2 | not found         |
| 9  | 1 | 1    | 1  | 1  | 1  | 1 | 1 | 1 | 1 | 11 | 2 | not found         |
| 10 | 0 | 0    | 1  | 0  | 0  | 1 | 0 | 0 | 0 | 5  | 1 | not found         |
| 11 | 1 | 1    | 1  | 1  | 1  | 1 | 1 | 1 | 1 | 11 | 2 | not found         |
| 12 | 1 | 1    | 0  | 1  | 1  | 0 | 0 | 0 | 0 | 7  | 1 | 5/10 & 9 (strong) |
| 13 | 1 | 0    | 1  | 1  | 1  | 0 | 0 | 0 | 1 | 8  | 2 | not found         |
| 14 | 0 | 1    | 1  | 1  | 1  | 1 | 1 | 0 | 0 | 9  | 2 | not found         |
| 15 | 1 | 1    | 1  | 1  | 1  | 1 | 0 | 0 | 1 | 10 | 2 | not found         |
| 16 | 1 | 1    | 1  | 0  | 0  | 0 | 0 | 0 | 0 | 6  | 1 | not found         |

Tabelle1

|    |    |     |      |                                                                                                                                                                                                                                                          |                     |   |   |   |
|----|----|-----|------|----------------------------------------------------------------------------------------------------------------------------------------------------------------------------------------------------------------------------------------------------------|---------------------|---|---|---|
| 1  |    |     |      |                                                                                                                                                                                                                                                          |                     |   |   |   |
| 2  |    |     |      |                                                                                                                                                                                                                                                          |                     |   |   |   |
| 3  |    |     |      |                                                                                                                                                                                                                                                          |                     |   |   |   |
| 4  | SR | 138 | 2011 | Wu S, Cohen D, Shi Y, Pearson M, Sturm R. Economic analysis of physical activity interventions. <i>Am J Prev Med.</i> 2011;40(2):149–58.                                                                                                                 | none mentioned      | 1 | 1 | 1 |
| 5  |    |     |      | Rodgers M, Asaria M, Walker S, McMillan D, Lucock M, Harden M, et al. The clinical effectiveness and cost-effectiveness of low-intensity psychological interventions for the                                                                             |                     |   |   |   |
| 6  | SR | 139 | 2012 | secondary prevention of relapse after depression: a systematic review. <i>Health Technol</i>                                                                                                                                                             | yes                 | 1 | 1 | 1 |
| 7  |    |     |      | Chien T-J, Liu C-Y, Chang Y-F, Fang C-J, Hsu C-H. Acupuncture for Treating Aromatase Inhibitor-Related Arthralgia in Breast Cancer: A Systematic Review and Meta-Analysis. <i>Journal of Alternative and Complementary Medicine.</i> 2015;21(5):251-260. |                     |   |   |   |
| 8  |    |     |      | doi:10.1089/acm.2014.0083.                                                                                                                                                                                                                               | none mentioned      | 1 | 1 | 1 |
| 9  | SR | 140 | 2015 | Int J Integr Care 2013; Jul–Sep; URN:NBN:NL:Ui:10-1-114740 , Community services'                                                                                                                                                                         | none mentioned      | 1 | 1 | 1 |
| 10 |    |     |      | involvement in the discharge of older adults from hospital into the community,                                                                                                                                                                           |                     |   |   |   |
| 11 | SR | 141 | 2013 | Johantgen M, Fountain L, Zangaro G, Newhouse R, Stanik-Hutt J, White K. Comparison of                                                                                                                                                                    |                     |   |   |   |
| 12 |    |     |      | labor and delivery care provided by certified nurse-midwives and physicians: a systematic                                                                                                                                                                |                     |   |   |   |
| 13 |    |     |      | review, 1990 to 2008. <i>Womens Health Issues Off Publ Jacobs Inst Womens Health.</i>                                                                                                                                                                    | none mentioned      | 1 | 1 | 1 |
| 14 | SR | 142 | 2012 | 2012;22:e73–e81. doi: 10.1016/j.whi.2011.06.005.                                                                                                                                                                                                         |                     |   |   |   |
| 15 |    |     |      | Rozet, F., Bastide, C., Beuzeboc, P., Cormier, L., Fromont, G., Hennequin, C., Soulié,                                                                                                                                                                   |                     |   |   |   |
| 16 |    |     |      | A6:1134 (2015). [Management of low-risk prostate cancer]. <i>Progrès En Urologie : Journal</i>                                                                                                                                                           |                     |   |   |   |
| 17 |    |     |      | de l'Association Française d'urologie et de La Société Française d'urologie, 25(1), 1–10.                                                                                                                                                                | none mentioned      | 1 | 0 | 0 |
| 18 | SR | 143 | 2015 | <a href="https://doi.org/10.1016/j.purol.2014.10.007">https://doi.org/10.1016/j.purol.2014.10.007</a>                                                                                                                                                    |                     |   |   |   |
| 19 |    |     |      | Maglione, Margaret A.; Das, Lopamudra; Raaen, Laura; et al. Safety of Vaccines Used for                                                                                                                                                                  |                     |   |   |   |
| 20 | SR | 144 | 2014 | Routine Immunization of US Children: A Systematic Review PEDIATRICS Volume: 134                                                                                                                                                                          | yes (not mentioned) | 1 | 1 | 1 |
| 21 |    |     |      | Issue: 2 Pages: 325-337 Published: AUG 2014 DOI <a href="http://dx.doi.org/10.1542/peds">http://dx.doi.org/10.1542/peds</a> .                                                                                                                            |                     |   |   |   |
| 22 |    |     |      | Albrecht B, Staiger PK, Hall K, et al. (2014) Benzodiazepine use and aggressive                                                                                                                                                                          |                     |   |   |   |
| 23 | SR | 145 | 2014 | behaviour: A systematic review. <i>Australian and New Zealand Journal of Psychiatry</i> 48:                                                                                                                                                              | yes (not mentioned) | 1 | 1 | 1 |
| 24 |    |     |      | 1096–1114. doi: 10.1177/0004867414548902                                                                                                                                                                                                                 |                     |   |   |   |
| 25 |    |     |      | Te Morenga Lisa, Mallard Simonette, Mann Jim. Dietary sugars and body weight:                                                                                                                                                                            |                     |   |   |   |
| 26 | SR | 146 | 2012 | systematic review and meta-analyses of randomised controlled trials and cohort studies                                                                                                                                                                   | yes                 | 1 | 1 | 1 |
| 27 |    |     |      | <i>BMJ</i> 2013; 346 :e7492 doi: <a href="http://dx.doi.org/10.1136/bmj.e7492">http://dx.doi.org/10.1136/bmj.e7492</a>                                                                                                                                   |                     |   |   |   |
| 28 |    |     |      | Jeannette A. C. Lankhaar, Wouter R. de Vries, Jaap A. C. G. Jansen, Pierre M. J. Zelissen                                                                                                                                                                |                     |   |   |   |
| 29 |    |     |      | & Frank J. G. Backx (2014) Impact of Overt and Subclinical Hypothyroidism on Exercise                                                                                                                                                                    |                     |   |   |   |
| 30 | SR | 147 | 2014 | Tolerance: A Systematic Review, <i>Research Quarterly for Exercise and Sport</i> , 85:3, 365-                                                                                                                                                            | none mentioned      | 1 | 1 | 1 |
| 31 |    |     |      | 389, DOI: 10.1080/02701367.2014.930405                                                                                                                                                                                                                   |                     |   |   |   |
| 32 |    |     |      | Vanessa Siffredi , Vicki Anderson , Richard J. Leventer & Megan M. Spencer- Smith (2013)                                                                                                                                                                 |                     |   |   |   |
| 33 | SR | 148 | 2013 | Neuropsychological Profile of Agenesis of the Corpus Callosum: A Systematic Review,                                                                                                                                                                      | none mentioned      | 1 | 1 | 1 |
| 34 |    |     |      | <i>Developmental Neuropsychology</i> , 38:1, 36-57, DOI: 10.1080/87565641.2012.721421                                                                                                                                                                    |                     |   |   |   |
| 35 |    |     |      | Llewellyn, A., Simmonds, M., Owen, C. G., and Woolacott, N. (2015) Childhood obesity as                                                                                                                                                                  |                     |   |   |   |
| 36 | SR | 149 | 2015 | a predictor of morbidity in adulthood: a systematic review and meta-analysis. <i>Obes Rev</i> ,                                                                                                                                                          | yes                 | 1 | 0 | 1 |
| 37 |    |     |      | 17: 56–67. doi: 10.1111/obr.12316.                                                                                                                                                                                                                       |                     |   |   |   |
| 38 |    |     |      | Matsuda, A., Yamaoka, K., Tango, T., Matsuda, T., Nishimoto, H. (2014). Effectiveness of                                                                                                                                                                 |                     |   |   |   |
| 39 | SR | 150 | 2014 | psychoeducational support on quality of life in early-stage breast cancer patients: A                                                                                                                                                                    | none mentioned      | 1 | 1 | 1 |
| 40 |    |     |      | systematic review and meta-analysis of randomized controlled trials. <i>Qual Life R</i>                                                                                                                                                                  |                     |   |   |   |
| 41 |    |     |      | A. Bak, J. Browne, H. P. Loveday and A. Tsiami (2013). Systematic review of nutritional                                                                                                                                                                  |                     |   |   |   |
| 42 | SR | 151 | 2013 | interventions to prevent healthcare-associated infections in undernourished elderly.                                                                                                                                                                     | yes (not mentioned) | 1 | 0 | 1 |
| 43 |    |     |      | <i>Proceedings of the Nutrition Society</i> , 72, E212 doi:10.1017/S0029665113002371.                                                                                                                                                                    |                     |   |   |   |

1  
2  
3  
4  
5  
6  
7  
8  
9  
10  
11  
12  
13  
14  
15  
16  
17  
18  
19  
20  
21  
22  
23  
24  
25  
26  
27  
28  
29  
30  
31  
32  
33  
34  
35  
36  
37  
38  
39  
40  
41  
42  
43  
44  
45  
46

Tabelle1

|   |   |   |   |    |   |   |   |   |   |    |           |            |
|---|---|---|---|----|---|---|---|---|---|----|-----------|------------|
| 0 | 1 | 0 | 0 | 0  | 0 | 0 | 0 | 0 | 0 | 4  | 1         | not found  |
| 1 | 1 | 0 | 1 | 1  | 1 | 1 | 1 | 1 | 1 | 10 | 2         | 8 (strong) |
| 1 | 0 | 1 | 1 | 1  | 1 | 1 | 0 | 1 | 9 | 2  | not found |            |
| 1 | 0 | 0 | 1 | 1  | 1 | 0 | 0 | 0 | 6 | 1  | not found |            |
| 0 | 0 | 1 | 1 | 1  | 1 | 1 | 0 | 0 | 7 | 1  | not found |            |
| 0 | 0 | 0 | 0 | na |   | 1 | 0 | 1 | 3 | 0  | not found |            |
| 1 | 0 | 0 | 0 | 0  | 0 | 0 | 0 | 1 | 5 | 1  | 3 (weak)  |            |
| 1 | 0 | 1 | 0 | 0  | 0 | 1 | 1 | 1 | 8 | 2  | not found |            |
| 1 | 0 | 1 | 0 | 0  | 0 | 1 | 1 | 1 | 8 | 2  | not found |            |
| 0 | 0 | 1 | 1 | 1  | 1 | 1 | 0 | 0 | 7 | 1  | not found |            |
| 0 | 0 | 1 | 0 | 0  | 0 | 0 | 0 | 0 | 4 | 1  | not found |            |
| 0 | 1 | 1 | 1 | 1  | 1 | 1 | 1 | 1 | 9 | 2  | not found |            |
| 0 | 0 | 1 | 1 | 1  | 1 | 1 | 0 | 0 | 7 | 1  | not found |            |
| 0 | 0 | 1 | 0 | 1  | 1 | 0 | 0 | 0 | 4 | 1  | not found |            |

Tabelle1

|    |     |      |                                                                                                                                                                                                                                                                                                                                                                 |                     |   |   |   |
|----|-----|------|-----------------------------------------------------------------------------------------------------------------------------------------------------------------------------------------------------------------------------------------------------------------------------------------------------------------------------------------------------------------|---------------------|---|---|---|
| SR | 152 | 2014 | L. Bourke, K. E. Homer, M. A. Thaha, L. Steed, D. J. Rosario, K. A. Robb, J. M. Saxton and S. J. C. Taylor Interventions to improve exercise behaviour in sedentary people living with and beyond cancer: A systematic review British Journal of Cancer (2014)                                                                                                  | yes (not mentioned) | 1 | 1 | 1 |
| SR | 153 | 2013 | BRAY, James et al. Effectiveness of parent-centred interventions [etc]. JBI Library of Systematic Reviews, [S.l.], v. 8, n. 16 Suppl, p. S34 - 45, jul. 2010. ISSN 1838-2142. <a href="http://www.joannabriggslibrary.org/jbilibrary/index.php/jbisrir/article/view/571/">http://www.joannabriggslibrary.org/jbilibrary/index.php/jbisrir/article/view/571/</a> | yes (not mentioned) | 1 | 1 | 0 |
| SR | 154 | 2014 | Tricco AC, Antony J, Khan PA, et al. Safety and effectiveness of dipeptidyl peptidase-4 inhibitors versus intermediate-acting insulin or placebo for patients with type 2 diabetes failing two oral antihyperglycaemic agents: a systematic review and network meta-analysis. BMJ Open 2014;4:e005752. doi:10.1136/bmjopen-2014-005752                          | yes                 | 1 | 1 | 1 |
| SR | 155 | 2012 | Agarwal R, Goldenberg M, Perry R, Ishak WW. The Quality of Life of Adults with Attention Deficit Hyperactivity Disorder: A Systematic Review. Innovations in Clinical Neuroscience. 2012;9(5-6):10-21.                                                                                                                                                          | no                  | 1 | 0 | 1 |
| SR | 156 | 2013 | Ian C. Scott, Rachael Tan, Daniel Stahl, Sophia Steer, Cathryn M. Lewis, and Andrew P. Cope The protective effect of alcohol on developing rheumatoid arthritis: a systematic review and meta-analysis Rheumatology (2013) 52 (5): 856-867 first published onli                                                                                                 | none mentioned      | 1 | 1 | 1 |
| SR | 157 | 2014 | Hu MB, Xu H, Bai PD, et al. Obesity has multifaceted impact on biochemical recurrence of prostate cancer: a dose-response meta-analysis of 36,927 patients. Med Oncol 2014; 31:829. DOI: 10.1007/s12032-013-0829-8                                                                                                                                              | none mentioned      | 1 | 1 | 1 |
| SR | 158 | 2014 | Blasco, M.A., Redleaf, M.I., 2014. Cochlear implantation in unilateral sudden deafness improves tinnitus and speech comprehension: meta-analysis and systematic review. Otol. Neurotol. 35 (8), 1426-1432. DOI: 10.1097/MAO.0000000000000431                                                                                                                    | none mentioned      | 1 | 1 | 1 |
| SR | 159 | 2014 | Vasconcellos, Fabricio; Seabra, Andre; Katzmarzyk, Peter T.; et al., Physical Activity in Overweight and Obese Adolescents: Systematic Review of the Effects on Physical Fitness Components and Cardiovascular Risk Factors SPORTS MEDICINE Volume: 44 Issue: 8 Pages: 1139-1152 Published: AUG 2014                                                            | none mentioned      | 1 | 1 | 1 |
| SR | 160 | 2015 | Gibbs et al., 2014, M. Gibbs, C. Winsper, S. Marwaha, E. Gilbert, M. Broome, S.P. Singh, Cannabis use and mania symptoms: a systematic review and meta-analysis J. Affect. Disord., 171C (2014), pp. 39–47, doi:10.1016/j.jad.2014.09.016                                                                                                                       | yes (not mentioned) | 1 | 1 | 1 |

**Rapid reviews**

1  
2  
3  
4  
5  
6  
7  
8  
9  
10  
11  
12  
13  
14  
15  
16  
17  
18  
19  
20  
21  
22  
23  
24  
25  
26  
27  
28  
29  
30  
31  
32  
33  
34  
35  
36  
37  
38  
39  
40  
41  
42  
43  
44  
45  
46

Tabelle1

|   |   |   |      |   |   |   |   |   |    |    |           |             |
|---|---|---|------|---|---|---|---|---|----|----|-----------|-------------|
| 1 | 1 | 1 | 1    | 1 | 1 | 1 | 1 | 1 | 0  | 10 | 2         | 10 (strong) |
| 0 | 0 | 0 | 0    | 0 | 0 | 1 | 1 | 1 | 5  | 1  | not found |             |
| 0 | 1 | 1 | 1    | 1 | 1 | 1 | 1 | 1 | 10 | 2  | not found |             |
| 0 | 0 | 1 | 0 na |   |   | 0 | 0 | 1 | 4  | 1  | not found |             |
| 0 | 0 | 1 | 0    | 0 | 0 | 1 | 0 | 1 | 6  | 1  | not found |             |
| 1 | 0 | 1 | 0    | 1 | 1 | 1 | 1 | 1 | 9  | 2  | not found |             |
| 1 | 1 | 1 | 0    | 0 | 0 | 0 | 0 | 1 | 7  | 1  | not found |             |
| 1 | 1 | 1 | 1    | 1 | 1 | 1 | 0 | 1 | 10 | 2  | not found |             |
| 1 | 1 | 1 | 1    | 1 | 1 | 1 | 1 | 1 | 11 | 2  | not found |             |

7

only

Tabelle1

|    |     |      |                                                                                                                                                                                                                                                                                                                                                           |                     |   |   |   |
|----|-----|------|-----------------------------------------------------------------------------------------------------------------------------------------------------------------------------------------------------------------------------------------------------------------------------------------------------------------------------------------------------------|---------------------|---|---|---|
| RR | 161 | 2015 | Sedation and Anesthesia Options for Diagnostic Procedures: A Review of Clinical Effectiveness and Guidelines<br>Menear M, Briand C.. Implementing a continuum of evidence-based psychosocial interventions for people with severe mental illness: part 1-review of major initiatives and implementation strategies. Can J Psychiatry (2014) 59(4):178–86. | no protocol         | 1 | 1 | 1 |
| RR | 162 | 2014 | Saeed S, Golfam M, Beall RF, Ashbury FD, Palmer LJ, Little J. Effectiveness of individual-focused interventions to prevent chronic disease. Eur J Clin Invest 2014;44:883–91.                                                                                                                                                                             | no protocol         | 0 | 1 | 1 |
| RR | 163 | 2014 | Sara A Kreindler, Yang Cui, Colleen J Metge, Melissa Raynard, Patient characteristics associated with longer emergency department stay: a rapid review, Emerg Med J 2016;33:3 194-199 Published Online First: 4 September 2015 doi:10.1136/emermed-2015-204913                                                                                            | none mentioned      | 1 | 1 | 1 |
| RR | 164 | 2015 | Chetan R Trivedy, Matthew W Cooke, Unscheduled return visits (URV) in adults to the emergency department (ED): a rapid evidence assessment policy review, Emerg Med J 2015;32:4 324-329 Published Online First: 28 October 2013 doi:10.1136/emermed-2013-202719                                                                                           | yes                 | 1 | 0 | 0 |
| RR | 165 | 2015 | J. Yu, Y. Wang, Y. Li, X. Li, C. Li, J.T. Shen, PHP74 - The DA Vinci Surgical System: A Rapid Review of the Clinical and Economic Evidence, Value in Health, Volume 17, Issue 7, November 2014, Page A798, ISSN 1098-3015, <a href="http://dx.doi.org/10.1016/j.jval.2014.08.476">http://dx.doi.org/10.1016/j.jval.2014.08.476</a> .                      | none mentioned      | 1 | 1 | 0 |
| RR | 166 | 2014 | Lal S, Adair CE. E-mental health: a rapid review of the literature. Psychiatr Serv. 2014;65:24–32.                                                                                                                                                                                                                                                        | none mentioned      | 1 | 0 | 0 |
| RR | 167 | 2014 | Beall RF, Baskerville N, Golfam M, Saeed S, Little J. Modes of delivery in prevention intervention studies: a rapid review. Eur J Clin Invest 2014;44:688–96. DOI: 10.1111/eci.12279                                                                                                                                                                      | mentioned           | 1 | 0 | 0 |
| RR | 168 | 2014 | Jiwa, M., McManus, A., and Dadich, A. (2013) Continuity of cancer care: Where do primary care practitioners fit in? Cancer Forum, 37(1): 31-34.                                                                                                                                                                                                           | yes                 | 1 | 1 | 1 |
| RR | 169 | 2013 | Movement Therapies for the Self-Management of Chronic Pain Symptoms, Courtney Lee, Cindy Crawford, Eric Schoomaker, Active Self-Care Therapies for Pain (PACT) Working Group, Pain Medicine Apr 2014, 15 (S1) S40-S53; DOI: 10.1111/pme.12411                                                                                                             | yes (not mentioned) | 1 | 0 | 0 |
| RR | 170 | 2014 | Boyce T, Holmes A (2012) Addressing Health Inequalities in the Delivery of the Human Papillomavirus Vaccination Programme: Examining the Role of the School Nurse. PLoS ONE 7(9): e43416. doi:10.1371/journal.pone.0043416                                                                                                                                | yes (not mentioned) | 1 | 1 | 1 |
| RR | 171 | 2012 | Attree P, French B, Milton B, Povall S, Whitehead M, Popay J. The experience of community engagement for individuals: a rapid review of evidence. Health & Social Care In The Community [serial online]. May 2011;19(3):250-260. Available from: MEDLINE, Ipswich, MA. doi: 10.1111/j.1365-2524.2010.00976.x                                              | none mentioned      | 1 | 0 | 0 |
| RR | 172 | 2011 | Sensory Art Therapies for the Self-Management of Chronic Pain Symptoms, Cindy Crawford, Courtney Lee, John Bingham, Active Self-Care Therapies for Pain (PACT) Working Group, Pain Medicine Apr 2014, 15 (S1) S66-S75; DOI: 10.1111/pme.12409                                                                                                             | none mentioned      | 1 | 0 | 0 |
| RR | 173 | 2014 | Ndumbe-Eyoh S, Moffatt H. Intersectoral action for health equity: a rapid systematic review. BMC Public Health. 2013;13:1056-2458-13-1056. DOI: 10.1186/1471-2458-13-1056                                                                                                                                                                                 | yes (not mentioned) | 1 | 1 | 1 |
| RR | 174 | 2013 |                                                                                                                                                                                                                                                                                                                                                           |                     | 1 | 1 | 1 |



Tabelle1

|    |   |   |   |   |   |   |   |   |   |    |   |           |    |  |
|----|---|---|---|---|---|---|---|---|---|----|---|-----------|----|--|
| 1  |   |   |   |   |   |   |   |   |   |    |   |           |    |  |
| 2  |   |   |   |   |   |   |   |   |   |    |   |           |    |  |
| 3  |   |   |   |   |   |   |   |   |   |    |   |           |    |  |
| 4  | 1 | 1 | 1 | 1 | 1 | 1 | 1 | 0 | 0 | 9  | 2 | not found | 9  |  |
| 5  |   |   |   |   |   |   |   |   |   |    |   |           |    |  |
| 6  |   |   |   |   |   |   |   |   |   |    |   |           |    |  |
| 7  | 0 | 0 | 0 | 0 | 0 | 0 | 0 | 0 | 1 | 3  | 0 | not found |    |  |
| 8  | 0 | 0 | 0 | 0 | 0 | 0 | 1 | 0 | 0 | 4  | 1 | not found | 4  |  |
| 9  |   |   |   |   |   |   |   |   |   |    |   |           |    |  |
| 10 |   |   |   |   |   |   |   |   |   |    |   |           |    |  |
| 11 |   |   |   |   |   |   |   |   |   |    |   |           |    |  |
| 12 | 0 | 1 | 1 | 0 | 0 | 0 | 0 | 0 | 1 | 4  | 1 | not found |    |  |
| 13 |   |   |   |   |   |   |   |   |   |    |   |           |    |  |
| 14 |   |   |   |   |   |   |   |   |   |    |   |           |    |  |
| 15 | 0 | 0 | 0 | 0 | 0 | 0 | 1 | 0 | 1 | 4  | 1 | not found | 4  |  |
| 16 |   |   |   |   |   |   |   |   |   |    |   |           |    |  |
| 17 |   |   |   |   |   |   |   |   |   |    |   |           |    |  |
| 18 | 0 | 0 | 0 | 0 | 0 | 0 | 0 | 0 | 0 | 2  | 0 | not found |    |  |
| 19 | 0 | 0 | 0 | 0 | 0 | 0 | 0 | 0 | 1 | 2  | 0 | not found |    |  |
| 20 |   |   |   |   |   |   |   |   |   |    |   |           |    |  |
| 21 |   |   |   |   |   |   |   |   |   |    |   |           |    |  |
| 22 | 0 | 0 | 0 | 0 | 0 | 0 | 0 | 0 | 0 | 3  | 0 | not found |    |  |
| 23 |   |   |   |   |   |   |   |   |   |    |   |           |    |  |
| 24 | 0 | 0 | 0 | 0 | 1 | 0 | 0 | 0 | 0 | 2  | 0 | not found |    |  |
| 25 |   |   |   |   |   |   |   |   |   |    |   |           |    |  |
| 26 |   |   |   |   |   |   |   |   |   |    |   |           |    |  |
| 27 | 0 | 0 | 1 | 1 | 0 | 0 | 0 | 0 | 1 | 6  | 1 | not found | 6  |  |
| 28 |   |   |   |   |   |   |   |   |   |    |   |           |    |  |
| 29 | 0 | 0 | 0 | 0 | 0 | 0 | 0 | 0 | 1 | 2  | 0 | not found |    |  |
| 30 |   |   |   |   |   |   |   |   |   |    |   |           |    |  |
| 31 |   |   |   |   |   |   |   |   |   |    |   |           |    |  |
| 32 | 0 | 0 | 0 | 0 | 0 | 0 | 0 | 0 | 1 | 3  | 0 | not found |    |  |
| 33 |   |   |   |   |   |   |   |   |   |    |   |           |    |  |
| 34 |   |   |   |   |   |   |   |   |   |    |   |           |    |  |
| 35 | 0 | 0 | 1 | 1 | 1 | 0 | 0 | 1 | 1 | 6  | 1 | not found |    |  |
| 36 |   |   |   |   |   |   |   |   |   |    |   |           |    |  |
| 37 | 1 | 0 | 1 | 1 | 1 | 1 | 1 | 1 | 1 | 10 | 2 | 7/10      | 10 |  |
| 38 |   |   |   |   |   |   |   |   |   |    |   |           |    |  |
| 39 |   |   |   |   |   |   |   |   |   |    |   |           |    |  |
| 40 |   |   |   |   |   |   |   |   |   |    |   |           |    |  |
| 41 |   |   |   |   |   |   |   |   |   |    |   |           |    |  |
| 42 |   |   |   |   |   |   |   |   |   |    |   |           |    |  |
| 43 |   |   |   |   |   |   |   |   |   |    |   |           |    |  |
| 44 |   |   |   |   |   |   |   |   |   |    |   |           |    |  |
| 45 |   |   |   |   |   |   |   |   |   |    |   |           |    |  |
| 46 |   |   |   |   |   |   |   |   |   |    |   |           |    |  |

Tabelle1

|    |     |      |                                                                                                                                                                                                                                                                                                                                                                                                  |                     |   |   |   |
|----|-----|------|--------------------------------------------------------------------------------------------------------------------------------------------------------------------------------------------------------------------------------------------------------------------------------------------------------------------------------------------------------------------------------------------------|---------------------|---|---|---|
| RR | 175 | 2014 | Brunton, G., Paraskeva, N., Caird, J., Bird, K. S., Kavanagh, J., Kwan, I., & ... Thomas, J. (2014). Psychosocial predictors, assessment, and outcomes of cosmetic procedures: a systematic rapid evidence assessment. <i>Aesthetic Plastic Surgery</i> , 38(5), 1030-1040. doi:10.1007/s00266-014-0369-4                                                                                        | yes (not mentioned) | 1 | 0 | 1 |
| RR | 176 | 2011 | Geddes et al., 2011, R. Geddes, J. Frank, S. Haw, A rapid review of key strategies to improve the cognitive and social development of children in Scotland, <i>Health Policy</i> , 101 (2011), pp. 20–28 doi:10.1016/j.healthpol.2010.08.013                                                                                                                                                     | none mentioned      | 1 | 1 | 1 |
| RR | 177 | 2013 | Humphreys, DK, Ogilvie, D. Synthesising evidence for equity impacts of population-based physical activity interventions: A pilot study. <i>Int J Behav Nutr Phys Act.</i> 2013;10:76. DOI: 10.1186/1479-5868-10-76                                                                                                                                                                               | none mentioned      | 1 | 0 | 1 |
| RR | 178 | 2014 | Muñoz, K., Caballero, A., & White, K. (2014). Effectiveness of questionnaires for screening hearing of school-age children: a comprehensive literature review. <i>International Journal Of Audiology</i> , 53(12), 910-914. doi:10.3109/14992027.2014.943846                                                                                                                                     | yes (not mentioned) | 1 | 0 | 1 |
| RR | 179 | 2014 | Physically Oriented Therapies for the Self-Management of Chronic Pain Symptoms, Cindy Crawford, Courtney Lee, Todd May, <i>Active Self-Care Therapies for Pain (PACT) Working Group</i> , <i>Pain Medicine</i> Apr 2014, 15 (S1) S54-S65; DOI: 10.1111/pme.12410                                                                                                                                 | none mentioned      | 1 | 1 | 1 |
| RR | 180 | 2014 | Moe-Byrne, T., Chambers, D., Harden, M., McDaid, C., Behaviour change interventions to promote prescribing of generic drugs: A rapid evidence synthesis and systematic review (2014) <i>BMJ Open</i> , 4 (5), art. no. e004623. doi: 10.1136/bmjopen-2013-004623                                                                                                                                 | yes                 | 1 | 1 | 1 |
| RR | 181 | 2014 | Hiithersay R, Strydom A, Moulster G & Buszewicz M (2014) Carer-led health interventions to monitor, promote and improve the health of adults with intellectual disabilities in the community: a systematic review. <i>Research in Developmental Disabilities</i> 35, 887–907. doi: 10.1016/j.ridd.2014.01.010                                                                                    | yes                 | 1 | 1 | 1 |
| RR | 182 | 2011 | Mann R, Gilbody S. Validity of two case finding questions to detect postnatal depression: a review of diagnostic test accuracy. <i>J Affect Disord.</i> 2011;133:388–97. doi:10.1016/j.jad.2010.11.015.                                                                                                                                                                                          | yes (not mentioned) | 1 | 0 | 1 |
| RR | 183 | 2013 | Barry, M. M., D'Eath, M., & Sixsmith, J. (2013). Interventions for improving population health literacy: insights from a rapid review of the evidence. <i>Journal Of Health Communication</i> , 18(12), 1507-1522. doi:10.1080/10810730.2013.840699                                                                                                                                              | yes (not mentioned) | 1 | 1 | 1 |
| RR | 184 | 2013 | Beck, C. R., Sokal, R., Arunachalam, N., Puleston, R., Cichowska, A., Kessel, A., Zambon, M., Nguyen-Van-Tam, J. S. and on behalf of the UK Antiviral Effectiveness Review Group (2013), Neuraminidase inhibitors for influenza: a review and public health perspective in the aftermath of the 2009 pandemic. <i>Influenza and Other Respiratory Viruses</i> , 7: 14–24. doi: 10.1111/irv.12048 |                     | 1 | 1 | 0 |
| RR | 185 | 2012 | McMurrin, M. (2012). Individual-level interventions for alcohol-related violence: a rapid evidence assessment. <i>Criminal Behaviour And Mental Health: CBMH</i> , 22(1), 14-28. doi:10.1002/cbm.821                                                                                                                                                                                             | yes (not mentioned) | 1 | 0 | 1 |
| RR | 186 | 2014 | Paul M. Dorresteyn, Norbertus A. Ipenburg, Kathryn J. Murphy, Michelle Smit, Jonna K. van Vulpen, Inge Wegner, Inge Stegeman, and Wilko Grolman, Rapid Systematic Review of Normal Audiometry Results as a Predictor for Benign Paroxysmal Positional Vertigo, <i>Otolaryngology -- Head and Neck Surgery</i> June 2014 150: 919-924, doi:10.1177/0194599814527233                               | none mentioned      | 1 | 1 | 1 |

1  
2  
3  
4  
5  
6  
7  
8  
9  
10  
11  
12  
13  
14  
15  
16  
17  
18  
19  
20  
21  
22  
23  
24  
25  
26  
27  
28  
29  
30  
31  
32  
33  
34  
35  
36  
37  
38  
39  
40  
41  
42  
43  
44  
45  
46

Tabelle1

|    |   |   |   |   |   |   |   |   |   |   |                                                                                  |   |
|----|---|---|---|---|---|---|---|---|---|---|----------------------------------------------------------------------------------|---|
| 1  | 1 | 0 | 0 | 1 | 1 | 1 | 0 | 1 | 7 | 1 | not found                                                                        | 7 |
| 2  | 0 | 0 | 0 | 0 | 0 | 0 | 0 | 0 | 3 | 0 | not found                                                                        |   |
| 3  | 0 | 0 | 0 | 0 | 0 | 1 | 0 | 1 | 4 | 1 | not found                                                                        |   |
| 4  | 0 | 0 | 1 | 0 | 0 | 0 | 0 | 1 | 4 | 1 | 6<br>(moderate)                                                                  |   |
| 5  | 0 | 0 | 1 | 1 | 1 | 1 | 1 | 1 | 9 | 2 | not found<br>na (no<br>rating tool<br>available for<br>this type of<br>document) | 9 |
| 6  | 0 | 0 | 1 | 1 | 0 | 0 | 0 | 1 | 6 | 1 | not found                                                                        |   |
| 7  | 0 | 0 | 1 | 1 | 1 | 0 | 1 | 1 | 7 | 1 | not found                                                                        |   |
| 8  | 0 | 0 | 1 | 1 | 1 | 1 | 1 | 1 | 0 | 8 | 7<br>(moderate)                                                                  | 8 |
| 9  | 0 | 0 | 0 | 0 | 0 | 1 | 0 | 1 | 4 | 1 | not found                                                                        | 4 |
| 10 | 0 | 0 | 1 | 0 | 0 | 0 | 0 | 0 | 3 | 0 | not found                                                                        |   |
| 11 | 0 | 0 | 1 | 1 | 1 | 0 | 0 | 1 | 7 | 1 | not found                                                                        |   |

Tabelle1

|                                      |     |      |                                                                                                                                                                                                                                                                                                                                                          |                     |   |   |   |
|--------------------------------------|-----|------|----------------------------------------------------------------------------------------------------------------------------------------------------------------------------------------------------------------------------------------------------------------------------------------------------------------------------------------------------------|---------------------|---|---|---|
| RR                                   | 187 | 2012 | KONNYU, K., KWOK, E., SKIDMORE, B., MOHER, D.. The effectiveness and safety of emergency department short stay units: a rapid review. Open Medicine, North America, 6, jan. 2012. Available at: <a href="http://www.openmedicine.ca/article/view/478/449">http://www.openmedicine.ca/article/view/478/449</a> .                                          | no protocol         | 1 | 1 | 1 |
| RR                                   | 188 | 2015 | Butow, P., Price, M. A., Shaw, J. M., Turner, J., Clayton, J. M., Grimison, P., Rankin, N., and Kirsten, L. (2015) Clinical pathway for the screening, assessment and management of anxiety and depression in adult cancer patients: Australian guidelines. Psycho-Oncology, 24: 987–1001. doi: 10.1002/pon.3920.                                        | no protocol         | 1 | 1 | 1 |
| RR                                   | 189 | 2014 | R.B. Costello, C.V. Lentino, C.C. Boyd, M.L. O'Connell, C.C. Crawford, M.L. Sprengel, et al., The effectiveness of melatonin for promoting healthy sleep: a rapid evidence assessment of the literature, Nutr. J., 13 (2014), p. 106 DOI: 10.1186/1475-2891-13-106                                                                                       | not published       | 1 | 0 | 1 |
| RR                                   | 190 | 2014 | Lee, C., Crawford, C., & Swann, S. (2014). Multimodal, integrative therapies for the self-management of chronic pain symptoms. Pain Medicine (Malden, Mass.), 15 Suppl 1S76-S85. doi:10.1111/pme.12408                                                                                                                                                   | yes (not mentioned) | 1 | 0 | 1 |
| <b>Rapid reviews (CRD databases)</b> |     |      |                                                                                                                                                                                                                                                                                                                                                          |                     |   |   |   |
| CRD RR                               | 191 | 2015 | Health Quality Ontario. Prophylactic antibiotics for individuals with chronic obstructive pulmonary disease (COPD): a rapid review. Health Quality Ontario; 2015 February. 26 p. Available from: <a href="http://www.hqontario.ca/evidence/evidence-process/episodes-of-">http://www.hqontario.ca/evidence/evidence-process/episodes-of-</a>             | none mentioned      | 1 | 0 | 1 |
| CRD RR                               | 192 | 2013 | Ghazipura M. Community versus inpatient rehabilitation in hip fracture patients: a rapid review. Toronto, Ontario; 2013 Apr. 23 p. Available from: <a href="http://www.hqontario.ca/evidence/publications-and-ohac-recommendations/rapid-reviews">http://www.hqontario.ca/evidence/publications-and-ohac-recommendations/rapid-reviews</a> .             | none mentioned      | 1 | 0 | 0 |
| CRD RR                               | 193 | 2015 | Health Quality Ontario. Sodium restriction in heart failure: a rapid review. Toronto: Health Quality Ontario; 2015 February. 20 p. Available from: <a href="http://www.hqontario.ca/evidence/evidence-process/episodes-of-care#community-chf">http://www.hqontario.ca/evidence/evidence-process/episodes-of-care#community-chf</a>                       | none mentioned      | 1 | 0 | 1 |
| CRD RR                               | 194 | 2014 | Lambrinos, A. Preoperative consultations: a rapid review. Toronto: Health Quality Ontario; 2014 March. 19 p. Available from: <a href="http://www.hqontario.ca/evidence/evidence-process/appropriateness-initiative#preop-consult">http://www.hqontario.ca/evidence/evidence-process/appropriateness-initiative#preop-consult</a> .                       | none mentioned      | 1 | 0 | 1 |
| CRD RR                               | 195 | 2013 | Ling D. Role of screening for respiratory syncytial virus or influenza and empirical antiviral treatment for patients with community-acquired pneumonia: a rapid review. Toronto, ON: Health Quality Ontario; 2013 November. 17 p. Available from: <a href="http://www.h">http://www.h</a>                                                               | none mentioned      | 1 | 0 | 1 |
| CRD RR                               | 196 | 2015 | Health Quality Ontario. Communication of discharge instructions: a rapid review. Toronto: Health Quality Ontario; 2015 February. 18 p. Available from: <a href="http://www.hqontario.ca/evidence/evidence-process/episodes-of-care#community-chf">http://www.hqontario.ca/evidence/evidence-process/episodes-of-care#community-chf</a> .                 | none mentioned      | 1 | 0 | 1 |
| CRD RR                               | 197 | 2013 | Ghazipura M. Optimal Timing for Antibiotic Administration in Patients with Community-Acquired Pneumonia. Toronto, ON: Health Quality Ontario; 2013 November. 23 p. Available from: <a href="http://www.hqontario.ca/evidence/publications-and-ohac-recommendations/rapi">http://www.hqontario.ca/evidence/publications-and-ohac-recommendations/rapi</a> | none mentioned      | 1 | 0 | 1 |

Tabelle1

|    |   |   |    |    |    |    |   |   |   |    |   |                                                         |   |
|----|---|---|----|----|----|----|---|---|---|----|---|---------------------------------------------------------|---|
|    |   |   |    |    |    |    |   |   |   |    |   | na (no rating tool available for this type of document) |   |
| 1  | 1 | 0 | 1  | 1  | 1  | 1  | 1 | 0 | 1 | 9  | 2 |                                                         | 9 |
| 2  | 0 | 0 | 0  | 0  | 0  | 0  | 0 | 0 | 0 | 3  | 0 | not found                                               | 3 |
| 3  | 0 | 0 | 1  | 0  | 0  | 1  | 0 | 0 | 1 | 5  | 1 | not found                                               | 5 |
| 4  | 0 | 0 | 1  | 1  | 1  | 0  | 1 | 1 | 1 | 7  | 1 | not found                                               | 7 |
| 5  |   |   |    |    |    |    |   |   |   | 4  |   |                                                         | 7 |
| 6  | 1 | 1 | 1  | 1  | 1  | 1  | 1 | 1 | 1 | 10 | 2 | not found                                               |   |
| 7  | 0 | 0 | 1  | 1  | 1  | na |   | 1 | 1 | 6  | 1 | not found                                               |   |
| 8  | 1 | 0 | 1  | 1  | 1  | 1  | 1 | 1 | 1 | 9  | 2 | not found                                               |   |
| 9  | 0 | 0 | 1  | 1  | 1  | 1  | 1 | 1 | 1 | 8  | 2 | not found                                               |   |
| 10 | 1 | 0 | na | na | na | na |   | 1 | 1 | 5  | 1 | not found                                               |   |
| 11 |   |   |    |    |    |    |   |   |   |    |   | na (no rating tool available for this type of document) |   |
| 12 | 1 | 0 | na | na | na | na |   | 1 | 1 | 5  | 1 | not found                                               |   |
| 13 | 1 | 0 | 0  | 1  | 1  | 1  | 1 | 1 | 1 | 8  | 1 | not found                                               |   |

1  
2  
3  
4  
5  
6  
7  
8  
9  
10  
11  
12  
13  
14  
15  
16  
17  
18  
19  
20  
21  
22  
23  
24  
25  
26  
27  
28  
29  
30  
31  
32  
33  
34  
35  
36  
37  
38  
39  
40  
41  
42  
43  
44  
45  
46

Tabelle1

|        |     |      |                                                                                                                                                                                                                                                                                                                                                                   |                |   |   |   |
|--------|-----|------|-------------------------------------------------------------------------------------------------------------------------------------------------------------------------------------------------------------------------------------------------------------------------------------------------------------------------------------------------------------------|----------------|---|---|---|
|        |     |      | McCurdy BR. Action plans for individuals with chronic obstructive pulmonary disease (COPD): a rapid review. Toronto, ON: Health Quality Ontario; 2013 Jan. 20 p. Available from: <a href="http://www.hqontario.ca/evidence/publications-and-ohrac-recommendations/rapid-review">www.hqontario.ca/evidence/publications-and-ohrac-recommendations/rapid-review</a> | none mentioned | 1 | 0 | 1 |
| CRD RR | 198 | 2013 |                                                                                                                                                                                                                                                                                                                                                                   |                |   |   |   |
|        |     |      | Wang M. Pulmonary rehabilitation in the home versus other settings for individuals with chronic obstructive pulmonary disease (COPD): a rapid review. Toronto: Health Quality Ontario; 2015 February. 23 p. Available from: <a href="http://www.hqontario.ca/evidence/ev">http://www.hqontario.ca/evidence/ev</a>                                                 | none mentioned | 1 | 0 | 1 |
| CRD RR | 199 | 2015 |                                                                                                                                                                                                                                                                                                                                                                   |                |   |   |   |
|        |     |      | Bungay, H., & Vella-Burrows, T. (2013). The effects of participating in creative activities on the health and well-being of children and young people: A rapid review of the literature. Perspectives in Public Health, 133(1), 44–52.                                                                                                                            | none mentioned | 1 | 0 | 1 |
| CRD RR | 200 | 2013 |                                                                                                                                                                                                                                                                                                                                                                   |                |   |   |   |
|        |     |      | Lambrinos A. Home-based exercise programs in heart failure: a rapid review. Toronto: Health Quality Ontario; 2015 February. 21 p. Available from: <a href="http://www.hqontario.ca/evidence/evidence-process/episodes-of-care#community-chf">http://www.hqontario.ca/evidence/evidence-process/episodes-of-care#community-chf</a> .                               | none mentioned | 1 | 0 | 1 |
| CRD RR | 201 | 2015 |                                                                                                                                                                                                                                                                                                                                                                   |                |   |   |   |
|        |     |      | Health Quality Ontario. Home-based versus centre-based rehabilitation for community-dwelling postacute stroke patients: an economic rapid review. Toronto: Health Quality Ontario; 2015 February. 23 p. Available from: <a href="http://www.hqontario.ca/evidence/eviden">http://www.hqontario.ca/evidence/eviden</a>                                             | none mentioned | 1 | 0 | 1 |
| CRD RR | 202 | 2015 |                                                                                                                                                                                                                                                                                                                                                                   |                |   |   |   |
|        |     |      | Nikitovic M. Intensity of rehabilitation after hip fracture: a rapid review. Toronto, ON: Health Quality Ontario; 2013 Apr. 17 p. Available from: <a href="http://www.hqontario.ca/evidence/publications-and-ohrac-recommendations/rapid-reviews">http://www.hqontario.ca/evidence/publications-and-ohrac-recommendations/rapid-reviews</a> .                     | none mentioned | 1 | 0 | 1 |
| CRD RR | 203 | 2013 |                                                                                                                                                                                                                                                                                                                                                                   |                |   |   |   |
|        |     |      | Self-management and educational interventions in the postacute stroke population: a rapid review. Toronto, ON: Health Quality Ontario; 2015 February. 23 p. Available from: <a href="http://www.hqontario.ca/evidence/evidence-process/episodes-of-care#community-strok">http://www.hqontario.ca/evidence/evidence-process/episodes-of-care#community-strok</a>   | none mentioned | 1 | 0 | 1 |
| CRD RR | 204 | 2015 |                                                                                                                                                                                                                                                                                                                                                                   |                |   |   |   |
|        |     |      | Health Quality Ontario. Criteria for referral to home care: a rapid review. Toronto: Health Quality Ontario; 2015 February. 20 p. Available from: <a href="http://www.hqontario.ca/evidence/evidence-process/episodes-of-care#community-chf">http://www.hqontario.ca/evidence/evidence-process/episodes-of-care#community-chf</a> .                               | none mentioned | 1 | 0 | 1 |
| CRD RR | 205 | 2015 |                                                                                                                                                                                                                                                                                                                                                                   |                |   |   |   |
|        |     |      | Baidoobonso S. Effect of supportive interventions on informal caregivers of people at the end of life: a rapid review. Toronto: Health Quality Ontario; 2014 December. 25 p. Available from: <a href="http://www.hqontario.ca/evidence/publications-and-ohrac-recommenda">http://www.hqontario.ca/evidence/publications-and-ohrac-recommenda</a>                  | none mentioned | 1 | 0 | 0 |
| CRD RR | 206 | 2014 |                                                                                                                                                                                                                                                                                                                                                                   |                |   |   |   |
|        |     |      | Miani C, Ball S, Pitchforth E, Exley J, King S, Roland M, et al. Organisational interventions to reduce length of stay in hospital: a rapid evidence assessment. Health Serv Deliv Res 2014;2(52). DOI: 10.3310/hsdr02520                                                                                                                                         | yes            | 1 | 1 | 1 |
| CRD RR | 207 | 2014 |                                                                                                                                                                                                                                                                                                                                                                   |                |   |   |   |
|        |     |      | Wang M. Airway clearance techniques for patients with stable chronic obstructive pulmonary disease (COPD): a rapid review. Toronto: Health Quality Ontario; 2015 February. 23 p. Available from: <a href="http://www.hqontario.ca/evidence/evidence-process/episodes-of-">http://www.hqontario.ca/evidence/evidence-process/episodes-of-</a>                      | none mentioned | 1 | 0 | 1 |
| CRD RR | 208 | 2015 |                                                                                                                                                                                                                                                                                                                                                                   |                |   |   |   |

Tabelle1

|    |   |   |    |    |    |    |   |   |   |    |   |  |                                                         |
|----|---|---|----|----|----|----|---|---|---|----|---|--|---------------------------------------------------------|
| 1  |   |   |    |    |    |    |   |   |   |    |   |  |                                                         |
| 2  |   |   |    |    |    |    |   |   |   |    |   |  |                                                         |
| 3  |   |   |    |    |    |    |   |   |   |    |   |  |                                                         |
| 4  |   |   |    |    |    |    |   |   |   |    |   |  | na (no rating tool available for this type of document) |
| 5  |   |   |    |    |    |    |   |   |   |    |   |  |                                                         |
| 6  |   |   |    |    |    |    |   |   |   |    |   |  |                                                         |
| 7  | 1 | 0 | 1  | 1  | 1  | na |   | 1 | 1 | 8  | 2 |  |                                                         |
| 8  |   |   |    |    |    |    |   |   |   |    |   |  |                                                         |
| 9  | 1 | 0 | 0  | 1  | 1  |    | 1 | 1 | 1 | 8  | 2 |  | not found                                               |
| 10 |   |   |    |    |    |    |   |   |   |    |   |  |                                                         |
| 11 | 1 | 0 | 1  | 1  | 1  |    | 1 | 1 | 0 | 8  | 2 |  | 6 (moderate)                                            |
| 12 |   |   |    |    |    |    |   |   |   |    |   |  |                                                         |
| 13 | 1 | 0 | 1  | 1  | 1  |    | 1 | 1 | 1 | 9  | 2 |  | not found                                               |
| 14 |   |   |    |    |    |    |   |   |   |    |   |  | na (no rating tool available for this type of document) |
| 15 |   |   |    |    |    |    |   |   |   |    |   |  |                                                         |
| 16 |   |   |    |    |    |    |   |   |   |    |   |  |                                                         |
| 17 |   |   |    |    |    |    |   |   |   |    |   |  |                                                         |
| 18 | 1 | 0 | 0  | 0  | 0  |    | 0 | 1 | 1 | 5  | 1 |  | not found                                               |
| 19 |   |   |    |    |    |    |   |   |   |    |   |  |                                                         |
| 20 |   |   |    |    |    |    |   |   |   |    |   |  |                                                         |
| 21 | 1 | 0 | na | na | na | na |   | 1 | 1 | 5  | 1 |  | not found                                               |
| 22 |   |   |    |    |    |    |   |   |   |    |   |  |                                                         |
| 23 | 1 | 0 | 0  | 1  | 1  |    | 0 | 1 | 1 | 7  | 1 |  | not found                                               |
| 24 |   |   |    |    |    |    |   |   |   |    |   |  |                                                         |
| 25 | 1 | 0 | 1  | 1  | 1  |    | 0 | 1 | 1 | 8  | 2 |  | not found                                               |
| 26 |   |   |    |    |    |    |   |   |   |    |   |  | na (no rating tool available for this type of document) |
| 27 |   |   |    |    |    |    |   |   |   |    |   |  | na (no rating tool available for this type of document) |
| 28 |   |   |    |    |    |    |   |   |   |    |   |  | na (no rating tool available for this type of document) |
| 29 |   |   |    |    |    |    |   |   |   |    |   |  |                                                         |
| 30 | 0 | 0 | 1  | 1  | 1  |    | 0 | 1 | 1 | 6  | 1 |  | na (no rating tool available for this type of document) |
| 31 |   |   |    |    |    |    |   |   |   |    |   |  | na (no rating tool available for this type of document) |
| 32 |   |   |    |    |    |    |   |   |   |    |   |  |                                                         |
| 33 |   |   |    |    |    |    |   |   |   |    |   |  |                                                         |
| 34 | 1 | 1 | 1  | 1  | 1  |    | 1 | 1 | 1 | 11 | 2 |  | not found                                               |
| 35 |   |   |    |    |    |    |   |   |   |    |   |  |                                                         |
| 36 |   |   |    |    |    |    |   |   |   |    |   |  |                                                         |
| 37 | 1 | 0 | 1  | 1  | 1  |    | 0 | 1 | 1 | 8  | 2 |  | not found                                               |
| 38 |   |   |    |    |    |    |   |   |   |    |   |  |                                                         |
| 39 |   |   |    |    |    |    |   |   |   |    |   |  |                                                         |
| 40 |   |   |    |    |    |    |   |   |   |    |   |  |                                                         |
| 41 |   |   |    |    |    |    |   |   |   |    |   |  |                                                         |
| 42 |   |   |    |    |    |    |   |   |   |    |   |  |                                                         |
| 43 |   |   |    |    |    |    |   |   |   |    |   |  |                                                         |
| 44 |   |   |    |    |    |    |   |   |   |    |   |  |                                                         |
| 45 |   |   |    |    |    |    |   |   |   |    |   |  |                                                         |
| 46 |   |   |    |    |    |    |   |   |   |    |   |  |                                                         |



Tabelle1

|        |     |      |                                                                                                                                                                                                                                                                                                                                                                                     |                |   |   |   |
|--------|-----|------|-------------------------------------------------------------------------------------------------------------------------------------------------------------------------------------------------------------------------------------------------------------------------------------------------------------------------------------------------------------------------------------|----------------|---|---|---|
|        |     |      | Health Quality Ontario. Exercise programs after pulmonary rehabilitation for patients with chronic obstructive pulmonary disease (COPD). Toronto: Health Quality Ontario; 2015 February. 20 p. Available from: <a href="http://www.hqontario.ca/evidence/evidence-proces">http://www.hqontario.ca/evidence/evidence-proces</a>                                                      | none mentioned | 1 | 0 | 1 |
| CRD RR | 209 | 2015 | Health Quality Ontario. Respiratory services in home care for individuals with chronic obstructive pulmonary disease (COPD): a rapid review. Toronto: Health Quality Ontario; 2015 February. 20 p. Available from: <a href="http://www.hqontario.ca/evidence/evidence-pr">http://www.hqontario.ca/evidence/evidence-pr</a>                                                          | none mentioned | 1 | 0 | 1 |
| CRD RR | 210 | 2015 | Brener S. Optimal timing to begin an active rehabilitation program after a hip fracture: a rapid review. Toronto, ON: Health Quality Ontario; 2013 Apr. 20 p. Available from: <a href="http://www.hqontario.ca/evidence/publications-and-ohtac-recommendations/rapid-re">http://www.hqontario.ca/evidence/publications-and-ohtac-recommendations/rapid-re</a>                       | none mentioned | 1 | 0 | 1 |
| CRD RR | 211 | 2013 | Schaik A. The effectiveness of statins for primary prevention: a rapid review. Toronto, ON: Health Quality Ontario; 2013 Feb. 23 p. Available from: <a href="http://www.hqontario.ca/evidence/publications-and-ohtac-recommendations/rapid-reviews">http://www.hqontario.ca/evidence/publications-and-ohtac-recommendations/rapid-reviews</a>                                       | none mentioned | 1 | 0 | 1 |
| CRD RR | 212 | 2013 | Health Quality Ontario. Physical activity counselling: a rapid review. Toronto: Health Quality Ontario; 2015 February. 20 p. Available from: <a href="http://www.hqontario.ca/evidence/evidence-process/episodes-of-care#community-chf">http://www.hqontario.ca/evidence/evidence-process/episodes-of-care#community-chf</a>                                                        | none mentioned | 1 | 0 | 1 |
| CRD RR | 213 | 2015 | Health Quality Ontario. Cognitive-behavioural therapy for anxiety and depression in patients with COPD: a rapid review. Toronto: Health Quality Ontario; 2015 February. 21 p. Available from: <a href="http://www.hqontario.ca/evidence/evidence-process/episodes-of-care#community-stroke">http://www.hqontario.ca/evidence/evidence-process/episodes-of-care#community-stroke</a> | none mentioned | 1 | 0 | 1 |
| CRD RR | 214 | 2015 | Ghazipura M. Cardiovascular and aerobic exercise in postacute stroke patients: a rapid review. Toronto, ON: Health Quality Ontario; 2015 February. 17 p. Available from: <a href="http://www.hqontario.ca/evidence/evidence-process/episodes-of-care#community-chf">http://www.hqontario.ca/evidence/evidence-process/episodes-of-care#community-chf</a>                            | none mentioned | 1 | 0 | 1 |
| CRD RR | 215 | 2015 | Health Quality Ontario. Aerobic exercise training in patients with heart failure: a rapid review. Toronto: Health Quality Ontario; 2015 February. 19 p. Available from: <a href="http://www.hqontario.ca/evidence/evidence-process/episodes-of-care#community-chf">http://www.hqontario.ca/evidence/evidence-process/episodes-of-care#community-chf</a>                             | none mentioned | 1 | 0 | 1 |
| CRD RR | 216 | 2015 | Health Quality Ontario. Care coordination for postacute stroke, chronic obstructive pulmonary disease, and heart failure clients: an economic rapid review. Toronto: Health Quality Ontario; 2015 February. 20 p. Available from: <a href="http://www.hqontario.ca/evidence">http://www.hqontario.ca/evidence</a>                                                                   | none mentioned | 1 | 0 | 1 |
| CRD RR | 217 | 2015 | Lambrinos A. Medication reconciliation at discharge: a rapid review. Toronto: Health Quality Ontario; 2015 February. 24 p. Available from: <a href="http://www.hqontario.ca/evidence/evidence-process/episodes-of-care#community-chf">http://www.hqontario.ca/evidence/evidence-process/episodes-of-care#community-chf</a>                                                          | none mentioned | 1 | 0 | 1 |
| CRD RR | 218 | 2015 | McCurdy BR. Inhospital physiotherapy for acute exacerbations of chronic obstructive pulmonary disease (AECOPD): a rapid review. Toronto, ON: Health Quality Ontario; 2012 Dec. 28 p. Available from: <a href="http://www.hqontario.ca/evidence/publications-and-ohtac-recommend">http://www.hqontario.ca/evidence/publications-and-ohtac-recommend</a>                              | none mentioned | 1 | 0 | 1 |
| CRD RR | 219 | 2013 | Health Quality Ontario. Effectiveness and safety of thrombolytics for ischemic stroke: a rapid review. Toronto, ON: Health Quality Ontario; 2013 Jan. 25 p. Available from: <a href="http://www.hqontario.ca/evidence/publications-and-ohtac-recommendations/rapid-revi">http://www.hqontario.ca/evidence/publications-and-ohtac-recommendations/rapid-revi</a>                     | none mentioned | 1 | 0 | 1 |
| CRD RR | 220 | 2013 |                                                                                                                                                                                                                                                                                                                                                                                     |                |   |   |   |

Tabelle1

|    |   |      |    |    |      |   |   |   |   |   |                                                                                  |  |
|----|---|------|----|----|------|---|---|---|---|---|----------------------------------------------------------------------------------|--|
| 1  |   |      |    |    |      |   |   |   |   |   |                                                                                  |  |
| 2  |   |      |    |    |      |   |   |   |   |   |                                                                                  |  |
| 3  |   |      |    |    |      |   |   |   |   |   |                                                                                  |  |
| 4  |   |      |    |    |      |   |   |   |   |   |                                                                                  |  |
| 5  | 1 | 0    | 0  | 1  | 1    | 0 | 1 | 1 | 7 | 1 | not found                                                                        |  |
| 6  |   |      |    |    |      |   |   |   |   |   |                                                                                  |  |
| 7  | 1 | 0    | 1  | 1  | 1    | 0 | 1 | 1 | 8 | 2 | not found                                                                        |  |
| 8  |   |      |    |    |      |   |   |   |   |   |                                                                                  |  |
| 9  |   |      |    |    |      |   |   |   |   |   |                                                                                  |  |
| 10 | 1 | 0    | 1  | 1  | 1 na |   | 1 | 1 | 8 | 2 | not found                                                                        |  |
| 11 |   |      |    |    |      |   |   |   |   |   |                                                                                  |  |
| 12 |   |      |    |    |      |   |   |   |   |   |                                                                                  |  |
| 13 | 1 | 0    | 1  | 1  | 1    | 1 | 1 | 1 | 9 | 2 | not found                                                                        |  |
| 14 |   |      |    |    |      |   |   |   |   |   |                                                                                  |  |
| 15 | 1 | 0    | 1  | 1  | 1    | 0 | 1 | 1 | 8 | 2 | not found                                                                        |  |
| 16 |   |      |    |    |      |   |   |   |   |   |                                                                                  |  |
| 17 | 1 | 0    | 0  | 1  | 1    | 1 | 1 | 1 | 8 | 2 | not found                                                                        |  |
| 18 |   |      |    |    |      |   |   |   |   |   |                                                                                  |  |
| 19 |   |      |    |    |      |   |   |   |   |   |                                                                                  |  |
| 20 | 1 | 0    | 1  | 1  | 1    | 1 | 1 | 1 | 9 | 2 | not found                                                                        |  |
| 21 |   |      |    |    |      |   |   |   |   |   |                                                                                  |  |
| 22 | 1 | 0    | 1  | 1  | 1    | 1 | 1 | 1 | 9 | 2 | not found                                                                        |  |
| 23 |   |      |    |    |      |   |   |   |   |   |                                                                                  |  |
| 24 |   |      |    |    |      |   |   |   |   |   |                                                                                  |  |
| 25 |   |      |    |    |      |   |   |   |   |   |                                                                                  |  |
| 26 |   |      |    |    |      |   |   |   |   |   |                                                                                  |  |
| 27 | 1 | 0 na | na | na | na   |   | 1 | 1 | 5 | 1 | not found<br>na (no<br>rating tool<br>available for<br>this type of<br>document) |  |
| 28 |   |      |    |    |      |   |   |   |   |   |                                                                                  |  |
| 29 | 1 | 0    | 1  | 1  | 1    | 1 | 1 | 1 | 9 | 2 | not found                                                                        |  |
| 30 |   |      |    |    |      |   |   |   |   |   |                                                                                  |  |
| 31 | 1 | 0    | 0  | 1  | 0    | 1 | 1 | 1 | 7 | 1 | not found                                                                        |  |
| 32 |   |      |    |    |      |   |   |   |   |   |                                                                                  |  |
| 33 |   |      |    |    |      |   |   |   |   |   |                                                                                  |  |
| 34 | 1 | 0    | 1  | 1  | 1    | 1 | 1 | 1 | 9 | 2 | not found                                                                        |  |

8  
 median  
 amstar: 8

Characteristics of stakeholder involvement in systematic and rapid reviews: Study characteristics

General Information

| Study type                     | Study ID | Year of study | version number | Citation                                                                                                                                                                                                                                                        | Institution performing review                                                                                                              | country | year | contact details, corresponding author (not shown) | specific topic                               | Thematic Focus | Type of intervention       | Setting specified                     | Setting            |
|--------------------------------|----------|---------------|----------------|-----------------------------------------------------------------------------------------------------------------------------------------------------------------------------------------------------------------------------------------------------------------|--------------------------------------------------------------------------------------------------------------------------------------------|---------|------|---------------------------------------------------|----------------------------------------------|----------------|----------------------------|---------------------------------------|--------------------|
| 15 Cochrane systematic reviews |          |               |                |                                                                                                                                                                                                                                                                 |                                                                                                                                            |         |      |                                                   |                                              |                |                            |                                       |                    |
| CSR                            | 101      | 2012          | 1              | Olsen O, Clausen JA. Planned hospital birth versus planned home birth. Cochrane Database of Systematic Reviews 2012, Issue 9. Art. No.: CD000352. DOI: 10.1002/14651858.CD000352.pub2.                                                                          | General Practice and Section of General Practice, Department of Public Health, University of                                               | DNK     | 2012 |                                                   | childbirth                                   | Treatment      | Type of birth              | birth setting hospital/home           | Multiple           |
| CSR                            | 102      | 2013          | 1              | Moi JHY, Sriranganathan MK, Edwards CJ, Buchbinder R. Lifestyle interventions for acute gout. Cochrane Database of Systematic Reviews 2013, Issue 11. Art. No.: CD010519. DOI: 10.1002/14651858.CD010519.pub2.                                                  | Department of Rheumatology, The Royal Melbourne Hospital, Parkville, Australia.                                                            | AUS     | 2013 |                                                   | Acute gout treatment                         | Treatment      | lifestyle interventions    | inpatients and outpatients            | multiple           |
| CSR                            | 103      | 2011          | 1              | Thomas RE, Lorenzetti D, Spragins W. Mentoring adolescents to prevent drug and alcohol use. Cochrane Database of Systematic Reviews 2011, Issue 11. Art. No.: CD007381. DOI: 10.1002/14651858.CD007381.pub2.                                                    | University of Calgary, Department of Medicine, Calgary, Alberta, Canada                                                                    | CAN     | 2011 |                                                   | drug/alcohol prevention                      | Prevention     | mentoring acts of any kind | mentoring programs                    | Multiple           |
| CSR                            | 104      | 2012          | 1              | Garrison SR, Allan GM, Sekhon RK, Musini VM, Khan KM. Magnesium for skeletal muscle cramps. Cochrane Database of Systematic Reviews 2012, Issue 9. Art. No.: CD009402. DOI: 10.1002/14651858.CD009402.pub2.                                                     | University of British Columbia, Vancouver, BC, Canada                                                                                      | CAN     | 2012 |                                                   | Skeltal muscle cramps                        | Treatment      | Magnesium supplementation  | outpatients (primary care, community) | Outpatient         |
| CSR                            | 105      | 2012          | update         | Tejani AM, Wasdell M, Spiwak R, Rowell G, Nathwani S. Carnitine for fatigue in multiple sclerosis. Cochrane Database of Systematic Reviews 2012, Issue 5. Art. No.: CD007280. DOI: 10.1002/14651858.CD007280.pub3.                                              | University of British Columbia, Vancouver, BC, Canada                                                                                      | CAN     | 2012 |                                                   | Multiple Sclerosis fatigue                   | Treatment      | Carnitine supplementation  | outpatients                           | Outpatient         |
| CSR                            | 106      | 2013          | update         | Taylor F, Huffman MD, Macedo AF, Moore THM, Burke M, Davey Smith G, Ward K, Ebrahim S. Statins for the primary prevention of cardiovascular disease. Cochrane Database of Systematic Reviews 2013, Issue 1. Art. No.: CD004816. DOI: 10.1002/14651858.CD004816. | University of British Columbia, Vancouver, BC, Canada & Tropical Medicine, Department of Non-communicable Disease Epidemiology, London, UK | GBR     | 2013 |                                                   | primary prevention of cardiovascular disease | Prevention     | statins                    | community setting                     | Community          |
| CSR                            | 107      | 2013          | update         | Jorge EC, Jorge EN, El Dib RP. Early light reduction for preventing retinopathy of prematurity in very low birth weight infants. Cochrane Database of Systematic Reviews 2013, Issue 8. Art. No.: CD000122. DOI: 10.1002/14651858.CD000122.pub2.                | Botucatu Medical School, Universidade Estadual Paulista (UNESP), Botucatu, São Paulo, Brazil                                               | BRA     | 2013 |                                                   | ROP prevention in premature infants          | Prevention     | light reduction            | hospital                              | Inpatient/Hospital |
| CSR                            | 108      | 2012          | 1              | Jin H, Leng Q, Li C. Dietary flavonoid for preventing colorectal neoplasms. Cochrane Database of Systematic Reviews 2012, Issue 8. Art. No.: CD009350. DOI: 10.1002/14651858.CD009350.pub2.                                                                     | University of Traditional Chinese Medicine, National Center of Colorectal Surgery, Nanjing, Jiangsu                                        | CHN     | 2012 |                                                   | colorectal neoplasm prevention               | Prevention     | Flavonoid intake           | community setting                     | Community          |

1  
2  
3  
4  
5  
6  
7  
8  
9  
10  
11  
12  
13  
14  
15  
16  
17  
18  
19  
20  
21  
22  
23  
24  
25  
26  
27  
28  
29  
30  
31  
32  
33  
34  
35  
36  
37  
38  
39  
40  
41  
42  
43  
44  
45  
46

**Stakeholder involvement SHI** **PRISMA**

**notable conflicts of interests of authors** **review protocol** **SHI: yes = 1, no = 0** **Procedure according to PRISMA-guidelines**

| Population               | N      | overall age range | sex | Funding (who?)                                                                                                                          | notable conflicts of interests of authors           | review protocol | SHI: yes = 1, no = 0 | Procedure according to PRISMA-guidelines |
|--------------------------|--------|-------------------|-----|-----------------------------------------------------------------------------------------------------------------------------------------|-----------------------------------------------------|-----------------|----------------------|------------------------------------------|
| Low risk pregnant women  | 11     | pregnant          | f   | governmental, institutional: National Institute for Health Research, UK.                                                                | none                                                | yes             |                      | 1                                        |
| adults with acute gout   | 19     | adult             | f/m | governmental, institutional                                                                                                             | none                                                | yes             |                      | 0                                        |
| adolescents              | 1994   | 13 - 18           | f/m | governmental, institutional                                                                                                             | none                                                | yes             |                      | 0                                        |
| adults                   | 406    | adult             | f/m | governmental, institutional: Canadian Institutes of Health Research                                                                     | and Khan are co-authors of a RCT which was included | yes             |                      | 0                                        |
| adults with MS diagnosed | 36     | adult             | f/m | institutional: Fraser Health Research Administration and Development Office, Department of Social Medicine, University of Bristol, UK., | none                                                | yes             |                      | 1                                        |
| adults                   | 56934  | adult             | f/m | institutional: University of Rochester, NY, USA., Department of                                                                         | none                                                | yes             |                      | 0                                        |
| Premature human infants  | 897    | premature         | f/m | institutional: University of Rochester, NY, USA., Department of                                                                         | served as a member of the Data Safety               | yes             |                      | 0                                        |
| adults                   | 390769 | adult             | f/m | governmental, institutional                                                                                                             | none                                                | yes             |                      | 0                                        |



|    |               |               |     |                         |                |                |     |
|----|---------------|---------------|-----|-------------------------|----------------|----------------|-----|
| 1  |               |               |     |                         |                |                |     |
| 2  | adults with   |               |     | institutional: National |                |                |     |
| 3  | past          |               |     | Institute for Health    |                |                |     |
| 4  | cardiovascul  | 2505 adult    | f/m | Research (NIHR)         | none           | yes            | 0   |
| 5  | ar event      |               |     | programme grant,        |                |                |     |
| 6  |               |               |     | institutional: Centre   |                |                |     |
| 7  | adults        | 390769 adult  | f/m | for Clinical            | none           | yes            | 0   |
| 8  |               |               |     | Intervention            |                |                |     |
| 9  |               |               |     | Research,               |                |                |     |
| 10 | adolescents   | 1139 < 19     | f/m | institutional: South    | none           | yes            | 0   |
| 11 | antidepressa  |               |     | African Medical         |                |                |     |
| 12 | nt-induced    |               |     | Research Council,       | previously     |                |     |
| 13 | sexual        |               |     | South Africa., Open     | acted as a     |                |     |
| 14 | dysfunction   | 1886 adult    | f/m | Department of           | temporary      | yes            | 0   |
| 15 | adults, low-  |               |     | Psychiatry, University  | consultant for |                |     |
| 16 | or middle-    |               |     | of Oxford, UK.,         |                |                |     |
| 17 | income        | 40309 adult   | f/m | institutional: World    |                |                |     |
| 18 | country       |               |     | Health Organization,    | none           | yes            | 0   |
| 19 | children 0 -  |               |     | Department of           |                |                |     |
| 20 | 12            | 288 0 - 12    | f/m | HIV/AIDS,               | and MT work    | for paediatric |     |
| 21 | patients > 13 |               |     |                         | health         | facilities     | yes |
| 22 | with NBS      |               |     | governmental,           |                |                |     |
| 23 | diagnosed     | 0 > 13        | f/m | institutional           |                |                | 1   |
| 24 | HIV patients  |               |     | institutional:          |                |                |     |
| 25 | with          |               |     | Fondazione              |                |                |     |
| 26 | cryptococcal  |               |     | I.R.C.C.S. Istituto     | none           | yes            | 0   |
| 27 | meningitis    | 337 adult     | f/m | Neurologico Carlo       |                |                |     |
| 28 | patients with |               |     | governmental,           |                |                |     |
| 29 | ischaemic/ha  |               |     | institutional:          | has received   |                |     |
| 30 | emorrhagic    |               |     | Cochrane HIV/AIDS       | speaker fees   |                |     |
| 31 | stroke or TIA | 8021 adult    | f/m | Review Group, USA.      | for talks on   | yes            | 0   |
| 32 | diabetic      |               |     | institutional: National |                |                |     |
| 33 | peripheral    | no            |     | Basic Research          |                |                |     |
| 34 | neuropathy    | restriction   |     | Program of China,       |                |                |     |
| 35 | DPN           | 3639 s        | f/m | Centre for Evidence-    | none           | yes            | 0   |
| 36 | alcoholic     |               |     | institutional: The      |                |                |     |
| 37 | steatosis,    |               |     | Copenhagen Trial        |                |                |     |
| 38 | fibrosis,     | 710 adult     | f/m | Unit, Denmark., The     | none           | yes            | 0   |
| 39 | hepatitis,    |               |     | Danish Medical          |                |                |     |
| 40 | healthy       |               |     | institutional:          | Jefferson was  |                |     |
| 41 | children      | 300000 0 - 16 | f/m | REGIONE                 | an ad hoc      |                |     |
| 42 |               |               |     | PIEMONTE ASL 20         | consultant for |                |     |
| 43 |               |               |     | ALESSANDRIA,            | F. Hoffman-    | yes            | 0   |





|    |               |         |             |     |                        |                  |          |  |   |
|----|---------------|---------|-------------|-----|------------------------|------------------|----------|--|---|
| 1  | consumers,    |         |             |     | institutional: State   | review           |          |  |   |
| 2  | health        |         |             |     | University of New      | authors were     |          |  |   |
| 3  | professionals |         |             |     | York at Buffalo, NY,   | also authors     |          |  |   |
| 4  | , policy      | 16342   | adult       | f/m | USA., Italian National | of one           | yes      |  | 0 |
| 5  | acquired (not |         |             |     | institutional: Primary |                  |          |  |   |
| 6  | familial)     |         |             |     | Healthcare Research    |                  |          |  |   |
| 7  | hypercholest  | 0       | adult       | f/m | Development            | none             | yes      |  | 0 |
| 8  | erolaemia     |         |             |     | institutional: The     |                  |          |  |   |
| 9  | patients with |         |             |     | University of Hong     |                  |          |  |   |
| 10 | hematologica  |         | no          |     | Kong, Hong Kong,       |                  |          |  |   |
| 11 | l             |         | restriction |     | Cochrane               | none             | yes      |  | 0 |
| 12 | malignancies  | 593     | s           | f/m | institutional: The     |                  |          |  |   |
| 13 | adults with   |         |             |     | Chinese University of  |                  |          |  |   |
| 14 | diagnosis of  |         |             |     | Hong Kong, Hong        |                  |          |  |   |
| 15 | acute or      | 0       | adult       | f/m | Kong.                  | none             | yes      |  | 0 |
| 16 | chronic CHD   |         |             |     | governmental,          |                  |          |  |   |
| 17 | patients with |         |             |     | institutional: Leiden  |                  |          |  |   |
| 18 | lumbar        | 733     | adult       | f/m | University Medical     | none             | yes      |  | 0 |
| 19 | stenosis      |         |             |     | Center, Netherlands.   |                  |          |  |   |
| 20 | adults with   |         |             |     | institutional:         | Carvajal was     |          |  |   |
| 21 | sickle cell   |         |             |     | Iberoamerican          | employed by      |          |  |   |
| 22 | disease       | 198     | adult       | f/m | Cochrane Center,       | Eli Lilly to run | yes      |  | 1 |
| 23 | patients with |         |             |     | Spain., Cystic         | a four-hour      |          |  |   |
| 24 | hepatic       |         |             |     | institutional:         |                  |          |  |   |
| 25 | encephalopa   |         |             |     | Copenhagen Trial       |                  |          |  |   |
| 26 | thy           | 144     | adult       | f/m | Unit, Denmark., The    | none             | yes      |  | 0 |
| 27 | patients with |         |             |     | 1991 Pharmacy          | contributed to   |          |  |   |
| 28 | irritable     |         |             |     | institutional:         | the design       |          |  |   |
| 29 | bowel         |         |             |     | University of Leeds,   | and              |          |  |   |
| 30 | syndrome      | 213     | adult       | f/m | Research Institute,    | management       | yes      |  | 0 |
| 31 | and adults    |         |             |     | institutional: Centre  |                  |          |  |   |
| 32 | with fever or | not     | no          |     | for Evidence-Based     |                  |          |  |   |
| 33 | malaria       | mention | restriction |     | Health Care,           |                  |          |  |   |
| 34 | symptoms      | ed      | s           | f/m | Stellenbosch           | none             | yes      |  | 0 |
| 35 | opium         |         |             |     | governmental,          |                  |          |  |   |
| 36 | dependend     |         |             |     | institutional: Tehran  |                  |          |  |   |
| 37 | adults        | 870     | adult       | f/m | University of Medical  | none             | yes      |  | 0 |
| 38 | patients with |         |             |     | Sciences, Iran.        |                  |          |  |   |
| 39 | chronic heart |         |             |     | institutional:         |                  |          |  |   |
| 40 | failure       | 136182  | adult       | f/m | universities, British  | not              | none     |  |   |
| 41 |               |         |             |     | Heart Foundation       | mentioned        | mentione |  |   |
| 42 |               |         |             |     | Project Grant,         |                  | d        |  | 0 |
| 43 |               |         |             |     |                        |                  |          |  | 0 |



|    |                |           |             |               |                         |           |          |   |   |
|----|----------------|-----------|-------------|---------------|-------------------------|-----------|----------|---|---|
| 1  |                |           |             |               |                         |           |          |   |   |
| 2  | patients       |           |             |               |                         |           |          |   |   |
| 3  | treated with   |           |             | governmental, |                         |           |          |   |   |
| 4  | face mask      | 936       | adult       | f/m           | institutional           | none      | yes      | 0 | 1 |
| 5  | covered by     |           |             |               |                         |           |          |   |   |
| 6  | private or     | not       | no          |               | governmental,           |           | yes (not |   |   |
| 7  | public         | mention   | restriction | f/m           | institutional,          | not       | mentione | 1 | 1 |
| 8  | insurance      | ed        | s           |               | institutional           | mentioned | d)       |   |   |
| 9  | patients with  |           |             |               |                         |           | none     |   |   |
| 10 | type 2         |           |             |               | governmental,           |           | mentione |   |   |
| 11 | diabetes       | 23182     | adult       | f/m           | institutional           | none      | d        | 0 | 0 |
| 12 | diagnosed      |           |             |               |                         |           |          |   |   |
| 13 | with           |           |             |               |                         |           | none     |   |   |
| 14 | posttraumati   | 354       | > 14        | f/m           | governmental,           | not       | mentione | 0 | 1 |
| 15 | c stress       |           |             |               | institutional:          | mentioned | d        |   |   |
| 16 | individuals    |           |             |               | Health andMedical       |           | yes (not |   |   |
| 17 | with BMI >     | 4650877   | adult       | f/m           | Research Council of     | none      | mentione | 1 | 1 |
| 18 | 30             |           |             |               | Australia               |           | d)       |   |   |
| 19 | patients       |           |             |               |                         |           |          |   |   |
| 20 | suffering      |           |             |               | governmental,           | not       |          |   |   |
| 21 | from dyslexia  | 2726      | 6 to 36     | f/m           | institutional           | mentioned | no       | 0 | 1 |
| 22 |                | not       | no          |               | governmental,           |           | none     |   |   |
| 23 | Population     | mentioned | restriction | f/m           | institutional: National | not       | mentione | 0 | 1 |
| 24 | adults         |           | s           |               | Cancer research         | mentioned | d        |   |   |
| 25 | receiving      | not       |             |               | institute, UK           |           |          |   |   |
| 26 | treatment for  | mentioned | adult       | f/m           | governmental,           | none      | yes      | 0 | 0 |
| 27 | depression     |           |             |               | institutional           |           |          |   |   |
| 28 | women with     |           |             |               |                         |           | none     |   |   |
| 29 | breast         |           |             |               |                         |           | mentione |   |   |
| 30 | cancer         | 207       | adult       | f             | governmental,           | none      | d        | 0 | 1 |
| 31 | stages I - III |           |             |               | institutional           |           |          |   |   |
| 32 | patients > 65  |           |             |               |                         |           | none     |   |   |
| 33 | discharged     | 8440      | > 65        | f/m           | governmental,           | not       | mentione | 0 | 0 |
| 34 | from hospital  |           |             |               | institutional           | mentioned | d        |   |   |
| 35 |                |           | no          |               | institutional,          |           | none     |   |   |
| 36 | pregnant       |           | restriction |               | supported by Tri-       |           | mentione |   |   |
| 37 | women          | 2836410   | s           | f             | Council for Nursing     | not       | d        | 0 | 0 |
| 38 | patients with  |           |             |               | and the Advanced        | mentioned |          |   |   |
| 39 | low-risk       | not       |             |               |                         |           | none     |   |   |
| 40 | prostate       | mentioned | adult       | m             | governmental,           | none      | mentione | 0 | 1 |
| 41 | cancer         | ed        |             |               | institutional           |           | d        |   |   |

|    |    |     |      |   |                                                                                                                                                                                                                                                                                                                                                                                                                                                    |                                                                                                           |     |      |                                     |                 |                                          |                                |                 |
|----|----|-----|------|---|----------------------------------------------------------------------------------------------------------------------------------------------------------------------------------------------------------------------------------------------------------------------------------------------------------------------------------------------------------------------------------------------------------------------------------------------------|-----------------------------------------------------------------------------------------------------------|-----|------|-------------------------------------|-----------------|------------------------------------------|--------------------------------|-----------------|
| 1  |    |     |      |   | Maglione, Margaret A.; Das, Lopamudra; Raaen, Laura; et al. Safety of Vaccines Used for Routine Immunization of US Children: A Systematic Review PEDIATRICS Volume: 134 Issue: 2 Pages: 325-337 Published: AUG 2014 DOI http://dx.doi.org/10.1542/peds.                                                                                                                                                                                            | RAND Corporation, Santa Monica, California;                                                               | USA | 2014 | vaccination                         | Treatment       | assessing safety and adverse effects     | outpatients                    | Outpatient      |
| 2  |    |     |      |   | Albrecht B, Staiger PK, Hall K, et al. (2014) Benzodiazepine use and aggressive behaviour: A systematic review. Australian and New Zealand Journal of Psychiatry 48: 1096–1114. doi: 10.1177/0004867414548902                                                                                                                                                                                                                                      | School of Psychology, Deakin University, Melbourne, Australia                                             | AUS | 2014 | benzodiazepines association         | Treatment       | benzodiazepine consumption               | community and hospital setting | Multiple        |
| 3  | SR | 144 | 2014 | 1 | Te Morenga Lisa, Mallard Simonette, Mann Jim. Dietary sugars and body weight: systematic review and meta-analyses of randomised controlled trials and cohort studies BMJ 2013; 346 :e7492 doi: http://dx.doi.org/10.1136/bmj.e7492                                                                                                                                                                                                                 | Nutrition and Medicine, University of Otago, PO Box 56, Dunedin 9054, New Zealand                         | NZL | 2012 | sugar and bodyweight                | community-based | ad libitum diets                         | community setting              | Community       |
| 4  | SR | 145 | 2014 | 1 | Pierre M. J. Zelissen & Frank J. G. Backx (2014) Impact of Overt and Subclinical Hypothyroidism on Exercise Tolerance: A Systematic Review, Research Quarterly for Exercise and Sport, 85:3, 365-389, DOI: 10.1080/02701367.2014.930405                                                                                                                                                                                                            | Rehabilitation, Nursing Science and Sport, University Medical Center Utrecht                              | NED | 2014 | primary hypothyreosis               | community-based | exercise                                 | outpatients                    | Outpatient      |
| 5  |    |     |      |   | Vanessa Siffredi , Vicki Anderson , Richard J. Leventer & Megan M. Spencer- Smith (2013) Neuropsychological Profile of Agenesis of the Corpus Callosum: A Systematic Review, Developmental Neuropsychology, 38:1, 36-57, DOI: 10.1080/87565641.2012.721421                                                                                                                                                                                         | Murdoch Childrens Research Institute , Melbourne , Australia                                              | AUS | 2013 | Agenesis of Corpus Callosum         | community-based | measuring of IQ (quantitative)           | laboratory setting             | different/other |
| 6  | SR | 146 | 2012 | 1 | Llewellyn, A., Simmonds, M., Owen, C. G., and Woolacott, N. (2015) Childhood obesity as a predictor of morbidity in adulthood: a systematic review and meta-analysis. Obes Rev, 17: 56–67. doi: 10.1111/obr.12316.                                                                                                                                                                                                                                 | Centre for Reviews and Dissemination, University of York, York, UK                                        | GBR | 2015 | childhood obesity                   | community-based | assessing effect of obesity on mortality | community setting              | Community       |
| 7  | SR | 147 | 2014 | 1 | Matsuda, A., Yamaoka, K., Tango, T., Matsuda, T., Nishimoto, H. (2014). Effectiveness of psychoeducational support on quality of life in early-stage breast cancer patients: A systematic review and meta-analysis of randomized controlled trials. Qual Life R                                                                                                                                                                                    | Center for Cancer Control and Information Services, National Cancer Center, 5-1-1 Tsukiji, Chuo-ku, Tokyo | JPN | 2014 | breast cancer                       | Treatment       | psychoeducational support                | psychotherapy setting          | Outpatient      |
| 8  | SR | 148 | 2013 | 1 | A. Bak, J. Browne, H. P. Loveday and A. Tsiami (2013). Systematic review of nutritional interventions to prevent healthcare-associated infections in undernourished elderly. Proceedings of the Nutrition Society, 72, E212 doi:10.1017/S0029665113002371.                                                                                                                                                                                         | Joanna Briggs Institute Collaboration Centre, University of West London, Brentford TW8 9GA, UK            | GBR | 2013 | undernourishment of older people    | Treatment       | nutritional interventions                | healthcare setting             | different/other |
| 9  | SR | 149 | 2015 | 1 | L. Bourke, K. E. Homer, M. A. Thaha, L. Steed, D. J. Rosario, K. A. Robb, J. M. Saxton and S. J. C. Taylor Interventions to improve exercise behaviour in sedentary people living with and beyond cancer: A systematic review British Journal of Cancer (2014) Library of Systematic Reviews, [S.I.], v. 8, n. 16 Suppl, p. S34 - 45, jul. 2010. ISSN 1838-2142. http://www.joannabriggslibrary.org/jbilibrary/index.php/jbisrir/article/view/571/ | Care and Public Health, Barts and The London School of Medicine and Dentistry, Blizard Institute,         | GBR | 2014 | cancer and exercise                 | Treatment       | improving exercise behaviour             | community setting              | Community       |
| 10 | SR | 150 | 2014 | 1 | peptidase-4 inhibitors versus intermediate-acting insulin or placebo for patients with type 2 diabetes failing two oral antihyperglycaemic agents: a systematic review and network meta-analysis. BMJ Open 2014;4:e005752. doi:10.1136/bmjopen-2014-005752                                                                                                                                                                                         | School of Health Sciences, Faculty of Health, University of Newcastle.                                    | GBR | 2013 | childhood obesity                   | Prevention      | parent-centered interventions            | community , family setting     | Community       |
| 11 | SR | 151 | 2013 | 1 | Agarwal R, Goldenberg M, Perry R, Ishak WW. The Quality of Life of Adults with Attention Deficit Hyperactivity Disorder: A Systematic Review. Innovations in Clinical Neuroscience. 2012;9(5-6):10-21.                                                                                                                                                                                                                                             | Li Ka Shing Knowledge Institute, St. Michael's Hospital, Toronto, Ontario, Canada.                        | CAN | 2014 | DPP-4 inhibitors in type 2 diabetes | Treatment       | DPP-4 inhibitors/therapy                 | Home setting                   | Home            |
| 12 | SR | 152 | 2014 | 1 |                                                                                                                                                                                                                                                                                                                                                                                                                                                    |                                                                                                           |     |      |                                     |                 |                                          |                                |                 |
| 13 | SR | 153 | 2013 | 1 |                                                                                                                                                                                                                                                                                                                                                                                                                                                    |                                                                                                           |     |      |                                     |                 |                                          |                                |                 |
| 14 | SR | 154 | 2014 | 1 |                                                                                                                                                                                                                                                                                                                                                                                                                                                    |                                                                                                           |     |      |                                     |                 |                                          |                                |                 |
| 15 | SR | 155 | 2012 | 1 |                                                                                                                                                                                                                                                                                                                                                                                                                                                    |                                                                                                           |     |      |                                     |                 |                                          |                                |                 |

|    |                |           |             |     |                          |                     |  |          |   |
|----|----------------|-----------|-------------|-----|--------------------------|---------------------|--|----------|---|
| 1  |                |           |             |     | institutional: Agency    |                     |  |          |   |
| 2  |                |           |             |     | for Healthcare           |                     |  |          |   |
| 3  |                | not       |             |     | Research and             |                     |  | yes (not |   |
| 4  | children       | mentioned | children    | f/m | Quality, US              | none                |  | mentione |   |
| 5  |                |           |             |     |                          | has received        |  | d)       | 1 |
| 6  |                |           |             |     |                          | speaking            |  | d)       | 1 |
| 7  | adults         | 74536     | adult       | f/m | governmental,            | institutional       |  | yes (not | 1 |
| 8  |                |           |             |     | institutional:           | the University      |  | mentione | 1 |
| 9  |                |           | no          |     | University of Otago      | of Otago,           |  | d)       |   |
| 10 | Population     | 517844    | s           | f/m | and the Riddet           | Riddet              |  | yes      | 1 |
| 11 | patients with  |           | restriction |     | Institute, a New         | Institute, and      |  |          | 1 |
| 12 | primary        |           |             |     |                          |                     |  |          |   |
| 13 | hypothyreosi   |           |             |     | governmental,            | not                 |  | none     |   |
| 14 | s              | 1379      | 16 - 80     | f/m | institutional            | mentioned           |  | mentione | 0 |
| 15 | with           |           |             |     | institutional: Victorian |                     |  | d)       | 1 |
| 16 | diagnosed      |           |             |     | Government's             |                     |  |          |   |
| 17 | agenesis of    | 110       | 0 - 73      | f/m | Operational              | not                 |  | none     | 0 |
| 18 | Corpus         |           |             |     | Infrastructure           | mentioned           |  | mentione | 0 |
| 19 |                |           |             |     |                          |                     |  | d)       |   |
| 20 | children and   | 4648420   | 0 - 18      | f/m | governmental,            | institutional: NIHR |  | yes      | 0 |
| 21 | adolescents    |           |             |     | HTA Programme,           | none                |  |          | 1 |
| 22 | early- stage   |           |             |     | institutional: Ministry  |                     |  |          |   |
| 23 | breast         |           |             |     | of Education, Culture,   |                     |  | none     |   |
| 24 | cancer         | 1159      | adult       | f   | Sports, Science and      | not                 |  | mentione | 0 |
| 25 | patients       |           |             |     | Technology in Japan      | mentioned           |  | d)       | 1 |
| 26 | (some          |           |             |     |                          |                     |  |          |   |
| 27 | undernourish   |           |             |     |                          |                     |  | yes (not |   |
| 28 | ed, some       |           |             |     | governmental,            | not                 |  | mentione |   |
| 29 | well           | 2485      | > 59        | m/f | institutional            | mentioned           |  | d)       | 0 |
| 30 | people with    |           |             |     |                          |                     |  |          |   |
| 31 | primary        |           |             |     |                          |                     |  | yes (not |   |
| 32 | cancer         |           |             |     | governmental,            | not                 |  | mentione |   |
| 33 | diagnosis      | 648       | adult       | m/f | institutional            | mentioned           |  | d)       | 0 |
| 34 | school,        |           |             |     |                          |                     |  |          | 1 |
| 35 | primary and    | not       |             |     | governmental,            |                     |  | yes (not |   |
| 36 | secondary      | mentioned |             |     | institutional            | none                |  | mentione |   |
| 37 | school)        | ed        | < 18        | m/f | institutional:           |                     |  | d)       | 0 |
| 38 | patients with  |           |             |     | Canadian Institutes      |                     |  |          |   |
| 39 | type 2         |           |             |     | for Health               |                     |  |          |   |
| 40 | diabetes       | 2967      | adult       | m/f | Research/Drug            | none                |  | yes      | 1 |
| 41 |                |           |             |     |                          |                     |  |          | 1 |
| 42 |                |           |             |     |                          |                     |  |          |   |
| 43 |                |           | no          |     | governmental,            |                     |  |          |   |
| 44 | no restriction | 18933     | s           | m/f | institutional            | none                |  | no       | 0 |
| 45 |                |           | restriction |     |                          |                     |  |          | 0 |
| 46 |                |           |             |     |                          |                     |  |          |   |

1  
2  
3  
4  
5  
6  
7  
8  
9  
10  
11  
12  
13  
14  
15  
16  
17  
18  
19  
20  
21  
22  
23  
24  
25  
26  
27  
28  
29  
30  
31  
32  
33  
34  
35  
36  
37  
38  
39  
40  
41  
42  
43  
44  
45  
46

|    |     |      |   |                                                                                                                                                                                                                                                                                |                                                                                                                                         |     |      |                      |                 |                                                 |                            |            |
|----|-----|------|---|--------------------------------------------------------------------------------------------------------------------------------------------------------------------------------------------------------------------------------------------------------------------------------|-----------------------------------------------------------------------------------------------------------------------------------------|-----|------|----------------------|-----------------|-------------------------------------------------|----------------------------|------------|
| SR | 156 | 2013 | 1 | Ian C. Scott, Rachael Tan, Daniel Stahl, Sophia Steer, Cathryn M. Lewis, and Andrew P. Cope The protective effect of alcohol on developing rheumatoid arthritis: a systematic review and meta-analysis Rheumatology (2013) 52 (5): 856-867 first published online 15 June 2013 | Cellular Biology of Inflammation, Department of Medical and Molecular Genetics, Guy's Hospital, St Thomas' Hospital, London SE1 1UL, UK | GBR | 2013 | rheumatoid arthritis | community-based | alcohol intake                                  | community setting          | Community  |
| SR | 157 | 2014 | 1 | Hu MB, Xu H, Bai PD, et al. Obesity has multifaceted impact on biochemical recurrence of prostate cancer: a dose-response meta-analysis of 36,927 patients. Med Oncol 2014; 31:829. DOI: 10.1007/s12032-013-0829-8                                                             | Huashan Hospital, Fudan University, No.12 Wulumuqi Road, Shanghai, 200040, China                                                        | CHN | 2014 | prostate cancer      | Prevention      | assessing effect of obesity (BMI) on recurrence | clinical setting           | Outpatient |
| SR | 158 | 2014 | 1 | Blasco, M.A., Redleaf, M.I., 2014. Cochlear implantation in unilateral sudden deafness improves tinnitus and speech comprehension: meta-analysis and systematic review. Otol. Neurotol. 35 (8), 1426-1432. DOI: 10.1097/MAO.0000000000000431                                   | College of Medicine, University of Illinois at Chicago, Chicago, Illinois                                                               | USA | 2014 | cochlear implants    | Treatment       | hearing loss                                    | outpatients                | Outpatient |
| SR | 159 | 2014 | 1 | Physical Activity in Overweight and Obese Adolescents: Systematic Review of the Effects on Physical Fitness Components and Cardiovascular Risk Factors SPORTS MEDICINE Volume: 44 Issue: 8 Pages: 1139-1152 Published: AUG 2014                                                | Janeiro, Lab Phys Act & Hlth Promot, Inst Phys Educ & Sports, BR-20550013 Rio De Janeiro,                                               | BRA | 2014 | obesity prevention   | Prevention      | physical activity                               | community, therapy setting | Multiple   |
| SR | 160 | 2015 | 1 | Gibbs et al., 2014, M. Gibbs, C. Winsper, S. Marwaha, E. Gilbert, M. Broome, S.P. Singh, Cannabis use and mania symptoms: a systematic review and meta-analysis J. Affect. Disord., 171C (2014), pp. 39–47, doi:10.1016/j.jad.2014.09.016                                      | Division of Mental Health and Wellbeing, Warwick Medical School, University of Warwick, CV4 7AL, UK                                     | GBR | 2015 | cannabis use         | community-based | cannabis use and association with mania         | community setting          | Community  |

Rapid reviews

|    |               |       |         |     |                          |              |          |     |
|----|---------------|-------|---------|-----|--------------------------|--------------|----------|-----|
| 1  |               |       |         |     |                          |              |          |     |
| 2  |               |       |         |     | undertaking a            |              |          |     |
| 3  | drinkers/non- | 96462 | adult   | m/f | governmental,            | clinical re- | none     |     |
| 4  | drinkers      |       |         |     | institutional: Arthritis | search       | mentione |     |
| 5  | patients with |       |         |     | Research UK              | fellowship,  | d        | 0 0 |
| 6  | primary       |       |         |     | governmental,            |              |          |     |
| 7  | prostate      | 36927 | adult   | m   | institutional: National  |              | none     |     |
| 8  | cancer        |       |         |     | Natural Science          |              | mentione |     |
| 9  | patients with |       |         |     | Foundation of China      | none         | d        | 0 0 |
| 10 | unilateral    |       |         |     |                          |              |          |     |
| 11 | hearing loss  | 36    | adult   | m/f | governmental,            |              | none     |     |
| 12 | overweight    |       |         |     | institutional            | none         | mentione |     |
| 13 | and obese     |       |         |     | institutional: Carlos    |              | d        | 0 0 |
| 14 | adolescents   | 1616  | 12 - 17 | m/f | Chagas Filho             |              |          |     |
| 15 | who had       |       |         |     | Foundation for the       | none         | mentione |     |
| 16 | experienced   |       |         |     | Research Support in      | none         | d        | 0 1 |
| 17 | mania         | 2391  | > 12    | m/f |                          |              |          |     |
| 18 | symptoms      |       |         |     | governmental,            |              | yes (not |     |
| 19 |               |       |         |     | institutional            | none         | mentione |     |
| 20 |               |       |         |     |                          |              | d)       | 0 1 |

er review only

18  
19  
20  
21  
22  
23  
24  
25  
26  
27  
28  
29  
30  
31  
32  
33  
34  
35  
36  
37  
38  
39  
40  
41  
42  
43  
44  
45  
46





|    |                 |             |             |                       |                         |                |           |   |
|----|-----------------|-------------|-------------|-----------------------|-------------------------|----------------|-----------|---|
| 1  |                 |             |             |                       |                         |                |           |   |
| 2  | Anesthesia      | no          |             |                       |                         |                |           |   |
| 3  | patients of all | restriction |             | governmental,         | not                     | no             |           |   |
| 4  | ages            | 3538 s      | m/f         | institutional         | mentioned               | protocol       |           | 1 |
| 5  | adults with     |             |             | governmental,         |                         |                |           |   |
| 6  | severe          | not         |             | institutional:        |                         |                |           |   |
| 7  | mental          | mention     |             | Canadian Psychiatric  |                         | no             |           |   |
| 8  | illness SMI     | adult       | m/f         | Association           | none                    | protocol       |           | 0 |
| 9  |                 |             |             | institutional: Cancer |                         |                |           |   |
| 10 |                 | not         |             | Care Ontario,         |                         | none           |           |   |
| 11 | adults          | mentioned   | adult       | m/f                   | Ministry of Health      | not            | mentioned | 1 |
| 12 | patients in     | >           | no          |                       |                         |                |           |   |
| 13 | emergency       | 1700000     | restriction |                       | governmental,           |                |           |   |
| 14 | department      | 0           | s           | m/f                   | institutional           | none           | yes       | 1 |
| 15 | repeatedly      |             |             |                       |                         |                |           |   |
| 16 | visiting ED     | not         | no          |                       | governmental,           |                | none      |   |
| 17 | within 48 or    | mentioned   | restriction | m/f                   | institutional           | none           | mentioned | 0 |
| 18 | 72h             | ed          | s           |                       |                         |                |           |   |
| 19 | patients        |             |             |                       |                         |                |           |   |
| 20 | undergoing      |             |             |                       | governmental,           |                | none      |   |
| 21 | surgery         | 45516       | adult       | m                     | institutional           | mentioned      | mentioned | 0 |
| 22 | receiving       |             |             |                       |                         |                |           |   |
| 23 | mental          | not         | no          |                       |                         |                | none      |   |
| 24 | health          | mentioned   | restriction | m/f                   | governmental,           |                | mentioned | 0 |
| 25 | services        | ed          | s           |                       | institutional           | none           | d         |   |
| 26 |                 |             |             |                       | institutional: Cancer   |                |           |   |
| 27 | Population      | not         | no          | m/f                   | Care Ontario,           | not            | yes       | 0 |
| 28 |                 | mentioned   | restriction |                       | Ministry of Health      | mentioned      |           |   |
| 29 | Patients with   | ed          | s           | m/f                   | and Long-Term Care      | mentioned      | yes       | 0 |
| 30 | cancer          | ed          | s           | m/f                   | Institute NSW           | not            | yes (not  | 0 |
| 31 |                 |             |             |                       |                         | mentioned      | mentioned |   |
| 32 | patients with   |             |             |                       |                         |                | d)        |   |
| 33 | chronic pain    |             |             |                       | governmental,           |                | yes (not  |   |
| 34 | symptoms        | 2418        | adult       | m/f                   | institutional           | none           | mentioned | 1 |
| 35 |                 |             |             |                       | institutional; National |                |           |   |
| 36 | adolescent      |             | adolescen   |                       | Institute for Health    | the authors of | none      |   |
| 37 | girls           | 16744       | t           | f                     | Research (NIHR), UK     | The Marmot     | mentioned |   |
| 38 |                 |             |             |                       | Clinical Research       | Review's Fair  | d         |   |
| 39 |                 |             |             |                       | institutional: National | Society        |           |   |
| 40 | Population      | not         | no          | m/f                   | Institute for Health    |                | none      |   |
| 41 |                 | mentioned   | restriction |                       | and Clinical            |                | mentioned |   |
| 42 |                 | ed          | s           |                       | Excellence (NICE),      | none           | d         | 0 |



|    |                 |         |             |     |                          |            |          |   |
|----|-----------------|---------|-------------|-----|--------------------------|------------|----------|---|
| 1  | patients        |         |             |     |                          |            |          |   |
| 2  | suffering       |         |             |     |                          |            | none     |   |
| 3  | from chronic    |         |             |     | governmental,            |            | mentione |   |
| 4  | pain            | 711     | adult       | m/f | institutional            | none       | d        | 0 |
| 5  |                 |         |             |     |                          |            |          |   |
| 6  | general         |         | no          |     | governmental,            |            | yes (not |   |
| 7  | population      | 115613  | restriction | m/f | institutional            | none       | mentione | 1 |
| 8  | participants    |         |             |     | institutional: Policy    |            | d)       |   |
| 9  | requesting      | not     | no          |     | Research                 |            | yes (not |   |
| 10 | cosmetic        | mention | restriction | m/f | Programme in the         |            | mentione |   |
| 11 | procedures      | ed      | s           |     | Department of Health     | none       | d)       | 1 |
| 12 |                 |         |             |     | institutional:           |            |          |   |
| 13 | children 0–5    | not     |             |     | SCPHRP is funded         |            | none     |   |
| 14 | years           | mention | 0 - 5       | m/f | by the Medical           | not        | mentione |   |
| 15 |                 |         |             |     | Research Council         | mentioned  | d        | 0 |
| 16 | general         |         |             |     | institutional: British   |            |          |   |
| 17 | population      | not     | no          | m/f | Heart Foundation,        |            | none     |   |
| 18 |                 | mention | restriction |     | Economic and Social      |            | mentione |   |
| 19 |                 | ed      | s           |     | Research Council,        | none       | d        | 0 |
| 20 | school age      |         |             |     |                          |            |          |   |
| 21 | children        | 2717    | 2 - 13      | m/f | governmental,            |            | yes (not |   |
| 22 | patients        |         |             |     | institutional            | none       | mentione | 0 |
| 23 | suffering       |         |             |     |                          |            | d)       |   |
| 24 | from chronic    |         |             |     | governmental,            |            | none     |   |
| 25 | pain            | 1087    | adult       | m/f | institutional            | none       | mentione | 0 |
| 26 |                 |         |             |     |                          |            | d        |   |
| 27 | healthcare      | not     |             |     | governmental,            |            |          |   |
| 28 | providers       | mention | adult       | m/f | institutional: NIHR      |            | yes      | 1 |
| 29 | patients with   | ed      |             |     | CLAHRC for Leeds,        | none       |          |   |
| 30 | and without     |         |             |     | York & Bradford          |            |          |   |
| 31 | intellectual    |         |             |     | governmental,            |            |          |   |
| 32 | disabilities    | 4721    | > 2         | m/f | institutional: National  |            | yes      | 0 |
| 33 |                 |         |             |     | Institute for Health     | none       |          |   |
| 34 | adult women     |         |             |     | Research (NIHR)          |            |          |   |
| 35 | with live birth | 506     | adult       | f   | institutional: Hull York |            | yes (not |   |
| 36 |                 |         |             |     | Medical School           |            | mentione |   |
| 37 | adult health    | not     |             |     | (HYMS), University of    |            | d)       | 0 |
| 38 | service users   | mention | adult       | m/f | York, York               | none       |          |   |
| 39 |                 | ed      |             |     | institutional:           |            |          |   |
| 40 | Population      | not     | no          | m/f | European Centre for      |            | yes (not |   |
| 41 |                 | mention | restriction |     | Disease Prevention       | not        | mentione |   |
| 42 |                 | ed      | s           |     | and Control (ECDC)       | mentioned  | d)       | 1 |
| 43 |                 |         |             |     | institutional: Health    |            |          |   |
| 44 |                 | not     | no          |     | Protection Agency        | for        |          |   |
| 45 |                 | mention | restriction | m/f | (HPA) and the            | influenza- |          |   |
| 46 |                 | ed      | s           |     | Department of            | related    |          |   |
|    |                 |         |             |     | research from            |            |          | 1 |



|    |               |              |     |                                 |                  |                            |   |
|----|---------------|--------------|-----|---------------------------------|------------------|----------------------------|---|
| 1  |               |              |     |                                 |                  |                            |   |
| 2  | alcohol-      |              |     |                                 |                  |                            |   |
| 3  | associated    |              |     |                                 |                  |                            |   |
| 4  | violence      | 1265 > 14    | m/f | governmental,<br>institutional  | not<br>mentioned | yes (not<br>mentione<br>d) | 0 |
| 5  | problems      |              |     |                                 |                  |                            |   |
| 6  |               |              |     |                                 |                  | none                       |   |
| 7  | Patients with | 102 adult    | m/f | governmental,<br>institutional  | none             | mentione<br>d              | 0 |
| 8  | vertigo       |              |     |                                 |                  |                            |   |
| 9  | patients at   | no           |     | governmental,<br>institutional: | is a             | contributing               |   |
| 10 | emergency     | restriction  |     | Canadian Institutes             | editor for       | no                         |   |
| 11 | department    | 9963 s       | m/f | of Health Research              | Open             | protocol                   | 1 |
| 12 |               | not          |     |                                 |                  |                            |   |
| 13 | cancer        | mention      |     | governmental,<br>institutional  | not              | no                         |   |
| 14 | patients      | ed adult     | m/f |                                 | mentioned        | protocol                   | 1 |
| 15 | healthy       |              |     | institutional: Defense          |                  |                            |   |
| 16 | poplation or  |              |     | Health Program and              |                  |                            |   |
| 17 | patients with | 1903 adult   | m/f | USUHS, Consortium               | none             | not<br>published           | 1 |
| 18 | insomnia      |              |     | for Health and                  |                  |                            |   |
| 19 | patients with |              |     | governmental,<br>institutional  |                  | yes (not<br>mentione<br>d) |   |
| 20 | chronic pain  | 3561 adult   | m/f |                                 | none             |                            | 1 |
| 21 | symptoms      |              |     |                                 |                  |                            |   |
| 22 |               |              |     |                                 |                  |                            |   |
| 23 |               |              |     |                                 |                  |                            |   |
| 24 |               |              |     |                                 |                  |                            |   |
| 25 |               |              |     |                                 |                  | none                       |   |
| 26 | COPD          |              |     | governmental,<br>institutional  | none             | mentione<br>d              | 1 |
| 27 | patients      | 176 adult    | m/f |                                 |                  |                            |   |
| 28 |               |              |     |                                 |                  |                            |   |
| 29 | hip fracture  |              |     | governmental,<br>institutional  | none             | none                       |   |
| 30 | patients      | 195 > 65     | m/f |                                 |                  | mentione<br>d              | 1 |
| 31 |               |              |     |                                 |                  |                            |   |
| 32 | patients with |              |     | governmental,<br>institutional  | none             | none                       |   |
| 33 | heart failure | 3318 > 53    | m/f |                                 |                  | mentione<br>d              | 1 |
| 34 |               |              |     |                                 |                  |                            |   |
| 35 |               |              |     |                                 |                  | none                       |   |
| 36 | surgery       |              |     | governmental,<br>institutional  | none             | mentione<br>d              | 1 |
| 37 | patients      | 372746 adult | m/f |                                 |                  |                            |   |
| 38 |               |              |     |                                 |                  |                            |   |
| 39 | patients with |              |     | governmental,<br>institutional  | none             | none                       |   |
| 40 | CAP           | 0 adult      | f/m |                                 |                  | mentione<br>d              | 1 |





|    |               |         |          |     |                       |           |          |   |
|----|---------------|---------|----------|-----|-----------------------|-----------|----------|---|
| 1  | patients      |         |          |     |                       |           |          |   |
| 2  | being         |         |          |     |                       | none      |          |   |
| 3  | discharged    |         |          |     | governmental,         | mentione  |          |   |
| 4  | from hospital | 0       | adult    | f/m | institutional         | d         | none     | 1 |
| 5  |               |         |          |     |                       |           |          |   |
| 6  | patients with | not     |          |     |                       |           | none     |   |
| 7  | CAP           | mention | adult    | m/f | governmental,         | mentione  | d        | 1 |
| 8  |               | ed      |          |     | institutional         |           | none     |   |
| 9  |               |         |          |     |                       |           |          |   |
| 10 | patients with |         |          |     |                       |           | none     |   |
| 11 | COPD          | 574     | adult    | m/f | governmental,         | mentione  | d        | 1 |
| 12 |               |         |          |     | institutional         |           | none     |   |
| 13 | patients with |         |          |     |                       |           | none     |   |
| 14 | COPD          | ca 400  | > 40     | m/f | governmental,         | mentione  | d        | 1 |
| 15 |               |         |          |     | institutional         |           | none     |   |
| 16 | children 11 - |         |          |     |                       |           | none     |   |
| 17 | 18            | ca 3500 | 11 to 18 | m/f | funded by Lambeth     | not       | mentione |   |
| 18 |               |         |          |     | PCT                   | mentioned | d        | 0 |
| 19 |               |         |          |     |                       |           |          |   |
| 20 | heart failure |         |          |     |                       |           | none     |   |
| 21 | patients      | 296     | adult    | m/f | governmental,         | mentione  | d        | 1 |
| 22 |               |         |          |     | institutional         |           | none     |   |
| 23 | postacute     | not     |          |     |                       |           | none     |   |
| 24 | stroke        | mention | adult    | m/f | governmental,         | mentione  | d        | 1 |
| 25 | patients      | ed      |          |     | institutional         |           | none     |   |
| 26 |               |         |          |     |                       |           |          |   |
| 27 | patients with |         |          |     |                       |           | none     |   |
| 28 | hip fracture  | 0       | adult    | f/m | governmental,         | mentione  | d        | 1 |
| 29 | post-acute    |         |          |     | institutional         |           | none     |   |
| 30 | stroke, CHF,  | not     |          |     |                       |           | none     |   |
| 31 | and COPD      | mention | adult    | m/f | governmental,         | mentione  | d        | 1 |
| 32 | patients      | ed      |          |     | institutional         |           | none     |   |
| 33 |               |         |          |     |                       |           |          |   |
| 34 | adults        | 895     | adult    | m/f | governmental,         | mentione  | d        | 1 |
| 35 |               |         |          |     | institutional         |           | none     |   |
| 36 | patients at   |         |          |     |                       |           | none     |   |
| 37 | the end of    |         |          |     |                       |           | mentione |   |
| 38 | life          | 1836    | adult    | m/f | governmental,         | d         |          | 1 |
| 39 |               |         |          |     | institutional,        |           |          |   |
| 40 | acute         |         |          |     | institutional: funded |           |          |   |
| 41 | hospital      |         |          |     | by the HS&DR          |           |          |   |
| 42 | patients      | 142899  | adult    | m/f | programme, NIHR       | none      | yes      | 0 |

|    |        |     |      |   |                                                                                                                                                                                                                                   |                                                                                       |     |      |                                         |                 |                                     |                                               |                    |
|----|--------|-----|------|---|-----------------------------------------------------------------------------------------------------------------------------------------------------------------------------------------------------------------------------------|---------------------------------------------------------------------------------------|-----|------|-----------------------------------------|-----------------|-------------------------------------|-----------------------------------------------|--------------------|
| 1  |        |     |      |   | Wang M. Airway clearance techniques for patients with stable chronic obstructive pulmonary disease (COPD): a rapid review. Toronto: Health Quality Ontario; 2015 February. 23 p. Available from:                                  | Health Quality Ontario, <a href="http://www.hqontario.ca">http://www.hqontario.ca</a> | CAN | 2015 | COPD management                         | Treatment       | airway clearance techniques         | outpatients                                   | Outpatient         |
| 2  |        |     |      |   | Health Quality Ontario. Exercise programs after pulmonary rehabilitation for patients with chronic obstructive pulmonary disease (COPD). Toronto: Health Quality Ontario; 2015 February. 20 p. Available from:                    | Health Quality Ontario, <a href="http://www.hqontario.ca">http://www.hqontario.ca</a> | CAN | 2015 | COPD rehabilitation                     | Treatment       | exercise programs                   | community setting (exercise)                  | Community          |
| 3  |        |     |      |   | Health Quality Ontario. Respiratory services in home care for individuals with chronic obstructive pulmonary disease (COPD): a rapid review. Toronto: Health Quality Ontario; 2015 February. 20 p. Available from:                | Health Quality Ontario, <a href="http://www.hqontario.ca">http://www.hqontario.ca</a> | CAN | 2015 | respiratory rehabilitation              | Treatment       | respiratory therapy                 | therapy setting                               | Outpatient         |
| 4  | CRD RF | 208 | 2015 | 1 | <a href="http://www.hqontario.ca/evidence/evidence-process/episodes-of-care#community-chf">http://www.hqontario.ca/evidence/evidence-process/episodes-of-care#community-chf</a>                                                   | Health Quality Ontario, <a href="http://www.hqontario.ca">http://www.hqontario.ca</a> | CAN | 2015 | COPD management                         | Treatment       | airway clearance techniques         | outpatients                                   | Outpatient         |
| 5  |        |     |      |   | Health Quality Ontario. Physical activity counselling: a rapid review. Toronto: Health Quality Ontario; 2015 February. 20 p. Available from:                                                                                      | Health Quality Ontario, <a href="http://www.hqontario.ca">http://www.hqontario.ca</a> | CAN | 2015 | secondary prevention of heart failure   | Prevention      | exercise counselling                | community setting (exercise)                  | Community          |
| 6  | CRD RF | 209 | 2015 | 1 | <a href="http://www.hqontario.ca/evidence/evidence-process/episodes-of-care#community-chf">http://www.hqontario.ca/evidence/evidence-process/episodes-of-care#community-chf</a>                                                   | Health Quality Ontario, <a href="http://www.hqontario.ca">http://www.hqontario.ca</a> | CAN | 2015 | secondary prevention of heart failure   | Prevention      | exercise counselling                | community setting (exercise)                  | Community          |
| 7  |        |     |      |   | Health Quality Ontario. Cognitive-behavioural therapy for anxiety and depression in patients with COPD: a rapid review. Toronto: Health Quality Ontario; 2015 February. 21 p. Available from:                                     | Health Quality Ontario, <a href="http://www.hqontario.ca">http://www.hqontario.ca</a> | CAN | 2015 | anxiety and depression in COPD patients | Treatment       | cognitive-behavioural therapy (CBT) | therapy setting                               | Outpatient         |
| 8  | CRD RF | 210 | 2015 | 1 | <a href="http://www.hqontario.ca/evidence/evidence-process/episodes-of-care#community-chf">http://www.hqontario.ca/evidence/evidence-process/episodes-of-care#community-chf</a>                                                   | Health Quality Ontario, <a href="http://www.hqontario.ca">http://www.hqontario.ca</a> | CAN | 2015 | anxiety and depression in COPD patients | Treatment       | cognitive-behavioural therapy (CBT) | therapy setting                               | Outpatient         |
| 9  |        |     |      |   | Health Quality Ontario. Aerobic exercise training in patients with heart failure: a rapid review. Toronto: Health Quality Ontario; 2015 February. 19 p. Available from:                                                           | Health Quality Ontario, <a href="http://www.hqontario.ca">http://www.hqontario.ca</a> | CAN | 2015 | secondary prevention of heart failure   | Prevention      | aerobic exercise                    | community setting (exercise)                  | Community          |
| 10 | CRD RF | 211 | 2013 | 1 | <a href="http://www.hqontario.ca/evidence/evidence-process/episodes-of-care#community-chf">http://www.hqontario.ca/evidence/evidence-process/episodes-of-care#community-chf</a>                                                   | Health Quality Ontario, <a href="http://www.hqontario.ca">http://www.hqontario.ca</a> | CAN | 2015 | secondary prevention of heart failure   | Prevention      | aerobic exercise                    | community setting (exercise)                  | Community          |
| 11 |        |     |      |   | Health Quality Ontario. Care coordination for postacute stroke, chronic obstructive pulmonary disease, and heart failure clients: an economic rapid review. Toronto: Health Quality Ontario; 2015 February. 20 p. Available from: | Health Quality Ontario, <a href="http://www.hqontario.ca">http://www.hqontario.ca</a> | CAN | 2015 | post-acute stroke, COPD, or CHF         | Health Services | care coordination intervention      | hospital hospital to home (discharge-setting) | Inpatient/Hospital |
| 12 | CRD RF | 212 | 2013 | 1 | <a href="http://www.hqontario.ca/evidence/evidence-process/episodes-of-care#community-chf">http://www.hqontario.ca/evidence/evidence-process/episodes-of-care#community-chf</a>                                                   | Health Quality Ontario, <a href="http://www.hqontario.ca">http://www.hqontario.ca</a> | CAN | 2015 | post-acute stroke, COPD, or CHF         | Health Services | care coordination intervention      | hospital hospital to home (discharge-setting) | Inpatient/Hospital |
| 13 |        |     |      |   | Health Quality Ontario. Medication reconciliation at discharge: a rapid review. Toronto: Health Quality Ontario; 2015 February. 24 p. Available from:                                                                             | Health Quality Ontario, <a href="http://www.hqontario.ca">http://www.hqontario.ca</a> | CAN | 2015 | Discharge procedure                     | Health Services | medication reconciliation           | (discharge-setting)                           | Different/other    |
| 14 | CRD RF | 213 | 2015 | 1 | <a href="http://www.hqontario.ca/evidence/evidence-process/episodes-of-care#community-chf">http://www.hqontario.ca/evidence/evidence-process/episodes-of-care#community-chf</a>                                                   | Health Quality Ontario, <a href="http://www.hqontario.ca">http://www.hqontario.ca</a> | CAN | 2015 | Discharge procedure                     | Health Services | medication reconciliation           | (discharge-setting)                           | Different/other    |
| 15 |        |     |      |   | Health Quality Ontario. Care coordination for postacute stroke, chronic obstructive pulmonary disease, and heart failure clients: an economic rapid review. Toronto: Health Quality Ontario; 2015 February. 20 p. Available from: | Health Quality Ontario, <a href="http://www.hqontario.ca">http://www.hqontario.ca</a> | CAN | 2015 | post-acute stroke, COPD, or CHF         | Health Services | care coordination intervention      | hospital hospital to home (discharge-setting) | Inpatient/Hospital |
| 16 | CRD RF | 214 | 2015 | 1 | <a href="http://www.hqontario.ca/evidence/evidence-process/episodes-of-care#community-chf">http://www.hqontario.ca/evidence/evidence-process/episodes-of-care#community-chf</a>                                                   | Health Quality Ontario, <a href="http://www.hqontario.ca">http://www.hqontario.ca</a> | CAN | 2015 | post-acute stroke, COPD, or CHF         | Health Services | care coordination intervention      | hospital hospital to home (discharge-setting) | Inpatient/Hospital |
| 17 |        |     |      |   | Health Quality Ontario. Care coordination for postacute stroke, chronic obstructive pulmonary disease, and heart failure clients: an economic rapid review. Toronto: Health Quality Ontario; 2015 February. 20 p. Available from: | Health Quality Ontario, <a href="http://www.hqontario.ca">http://www.hqontario.ca</a> | CAN | 2015 | post-acute stroke, COPD, or CHF         | Health Services | care coordination intervention      | hospital hospital to home (discharge-setting) | Inpatient/Hospital |
| 18 | CRD RF | 215 | 2015 | 1 | <a href="http://www.hqontario.ca/evidence/evidence-process/episodes-of-care#community-chf">http://www.hqontario.ca/evidence/evidence-process/episodes-of-care#community-chf</a>                                                   | Health Quality Ontario, <a href="http://www.hqontario.ca">http://www.hqontario.ca</a> | CAN | 2015 | post-acute stroke, COPD, or CHF         | Health Services | care coordination intervention      | hospital hospital to home (discharge-setting) | Inpatient/Hospital |
| 19 |        |     |      |   | Health Quality Ontario. Care coordination for postacute stroke, chronic obstructive pulmonary disease, and heart failure clients: an economic rapid review. Toronto: Health Quality Ontario; 2015 February. 20 p. Available from: | Health Quality Ontario, <a href="http://www.hqontario.ca">http://www.hqontario.ca</a> | CAN | 2015 | post-acute stroke, COPD, or CHF         | Health Services | care coordination intervention      | hospital hospital to home (discharge-setting) | Inpatient/Hospital |
| 20 | CRD RF | 216 | 2015 | 1 | <a href="http://www.hqontario.ca/evidence/evidence-process/episodes-of-care#community-chf">http://www.hqontario.ca/evidence/evidence-process/episodes-of-care#community-chf</a>                                                   | Health Quality Ontario, <a href="http://www.hqontario.ca">http://www.hqontario.ca</a> | CAN | 2015 | post-acute stroke, COPD, or CHF         | Health Services | care coordination intervention      | hospital hospital to home (discharge-setting) | Inpatient/Hospital |
| 21 |        |     |      |   | Health Quality Ontario. Care coordination for postacute stroke, chronic obstructive pulmonary disease, and heart failure clients: an economic rapid review. Toronto: Health Quality Ontario; 2015 February. 20 p. Available from: | Health Quality Ontario, <a href="http://www.hqontario.ca">http://www.hqontario.ca</a> | CAN | 2015 | post-acute stroke, COPD, or CHF         | Health Services | care coordination intervention      | hospital hospital to home (discharge-setting) | Inpatient/Hospital |
| 22 | CRD RF | 217 | 2015 | 1 | <a href="http://www.hqontario.ca/evidence/evidence-process/episodes-of-care#community-chf">http://www.hqontario.ca/evidence/evidence-process/episodes-of-care#community-chf</a>                                                   | Health Quality Ontario, <a href="http://www.hqontario.ca">http://www.hqontario.ca</a> | CAN | 2015 | post-acute stroke, COPD, or CHF         | Health Services | care coordination intervention      | hospital hospital to home (discharge-setting) | Inpatient/Hospital |
| 23 |        |     |      |   | Health Quality Ontario. Care coordination for postacute stroke, chronic obstructive pulmonary disease, and heart failure clients: an economic rapid review. Toronto: Health Quality Ontario; 2015 February. 20 p. Available from: | Health Quality Ontario, <a href="http://www.hqontario.ca">http://www.hqontario.ca</a> | CAN | 2015 | post-acute stroke, COPD, or CHF         | Health Services | care coordination intervention      | hospital hospital to home (discharge-setting) | Inpatient/Hospital |
| 24 | CRD RF | 218 | 2015 | 1 | <a href="http://www.hqontario.ca/evidence/evidence-process/episodes-of-care#community-chf">http://www.hqontario.ca/evidence/evidence-process/episodes-of-care#community-chf</a>                                                   | Health Quality Ontario, <a href="http://www.hqontario.ca">http://www.hqontario.ca</a> | CAN | 2015 | post-acute stroke, COPD, or CHF         | Health Services | care coordination intervention      | hospital hospital to home (discharge-setting) | Inpatient/Hospital |
| 25 |        |     |      |   | Health Quality Ontario. Care coordination for postacute stroke, chronic obstructive pulmonary disease, and heart failure clients: an economic rapid review. Toronto: Health Quality Ontario; 2015 February. 20 p. Available from: | Health Quality Ontario, <a href="http://www.hqontario.ca">http://www.hqontario.ca</a> | CAN | 2015 | post-acute stroke, COPD, or CHF         | Health Services | care coordination intervention      | hospital hospital to home (discharge-setting) | Inpatient/Hospital |
| 26 | CRD RF | 219 | 2013 | 1 | <a href="http://www.hqontario.ca/evidence/evidence-process/episodes-of-care#community-chf">http://www.hqontario.ca/evidence/evidence-process/episodes-of-care#community-chf</a>                                                   | Health Quality Ontario, <a href="http://www.hqontario.ca">http://www.hqontario.ca</a> | CAN | 2013 | acute exacerbating COPD                 | Treatment       | in-hospital physiotherapy           | hospital                                      | Inpatient/Hospital |

|    |               |              |       |               |               |          |  |   |
|----|---------------|--------------|-------|---------------|---------------|----------|--|---|
| 1  |               |              |       |               |               |          |  |   |
| 2  |               |              |       |               |               |          |  |   |
| 3  | patients with |              |       | governmental, |               | none     |  |   |
| 4  | stable COPD   | 525 adult    | m/f   | institutional | none          | mentione |  | 1 |
| 5  |               |              |       |               |               | d        |  |   |
| 6  | patients with | not          |       | governmental, |               | none     |  |   |
| 7  | COPD or       | mention      |       | institutional |               | mentione |  |   |
| 8  | pneumonia     | ed           | adult | m/f           | none          | d        |  | 1 |
| 9  |               |              |       |               |               |          |  |   |
| 10 | patients with |              |       | governmental, |               | none     |  |   |
| 11 | respiratory   | 37 adult     | m/f   | institutional | none          | mentione |  | 1 |
| 12 | disease       |              |       |               |               | d        |  |   |
| 13 |               |              |       |               |               |          |  |   |
| 14 | patients with |              |       | governmental, |               | none     |  |   |
| 15 | hip fracture  | 339 adult    | m/f   | institutional | none          | mentione |  | 1 |
| 16 |               |              |       |               |               | d        |  |   |
| 17 | adults        | 169921 adult | m/f   | governmental, |               | none     |  |   |
| 18 |               |              |       | institutional | none          | mentione |  | 1 |
| 19 |               |              |       |               |               | d        |  |   |
| 20 | patients with |              |       | governmental, |               | none     |  |   |
| 21 | heart failure | 1628 adult   | m/f   | institutional | none          | mentione |  | 1 |
| 22 |               |              |       |               |               | d        |  |   |
| 23 | patients with | not          |       | governmental, |               | none     |  |   |
| 24 | COPD          | mention      | adult | m/f           | institutional | mentione |  | 1 |
| 25 |               | ed           |       |               |               | d        |  |   |
| 26 | postacute     |              |       |               |               |          |  |   |
| 27 | stroke        | 399 adult    | m/f   | governmental, |               | none     |  |   |
| 28 | patients      |              |       | institutional | none          | mentione |  | 1 |
| 29 |               |              |       |               |               | d        |  |   |
| 30 | patients with |              |       | governmental, |               | none     |  |   |
| 31 | heart failure | 3662 adult   | m/f   | institutional | none          | mentione |  | 1 |
| 32 |               |              |       |               |               | d        |  |   |
| 33 | post-acute    |              |       |               |               |          |  |   |
| 34 | stroke,       |              |       | governmental, |               | none     |  |   |
| 35 | COPD, or      |              |       | institutional | none          | mentione |  | 1 |
| 36 | CHF           | 0 -          | f/m   |               |               | d        |  |   |
| 37 | being         |              |       |               |               |          |  |   |
| 38 | discharged,   |              |       |               |               |          |  |   |
| 39 | receiving     |              |       | governmental, |               | none     |  |   |
| 40 | medication    | 2447 adult   | m/f   | institutional | none          | mentione |  | 1 |
| 41 | patients with |              |       |               |               | d        |  |   |
| 42 | acute         |              |       |               |               |          |  |   |
| 43 | exacerbating  | not          |       | governmental, |               | none     |  |   |
| 44 | COPD          | mention      | adult | m/f           | institutional | mentione |  | 1 |
| 45 |               | ed           |       |               | none          | d        |  |   |
| 46 |               |              |       |               |               |          |  |   |

Health Quality Ontario. Effectiveness and safety of thrombolytics for  
ischemic stroke: a rapid review. Toronto, ON: Health Quality Ontario; 2013  
Jan. 25 p. Available from: [http://www.hqontario.ca/evidence/publications-  
and-ohrac-recommendations/rapid-revi](http://www.hqontario.ca/evidence/publications-<br/>and-ohrac-recommendations/rapid-revi)

Health Quality Ontario,  
<http://www.hqontario.ca>

CAN 2013

treatment of  
ischemic stroke

Treatment

intravenous  
thrombolytics  
administration

hospital

Inpatient/  
Hospital

For peer review only

1  
2  
3  
4  
5  
6  
7  
8  
9  
10  
11  
12  
13  
14  
15  
16  
17  
18  
19  
20  
21  
22  
23  
24  
25  
26  
27  
28  
29  
30  
31  
32  
33  
34  
35  
36  
37  
38  
39  
40  
41  
42  
43  
44  
45  
46

|                                |      |       |     |                             |      |                |   |
|--------------------------------|------|-------|-----|-----------------------------|------|----------------|---|
| patients with ischaemic stroke | 6288 | adult | m/f | governmental, institutional | none | none mentioned | 1 |
|--------------------------------|------|-------|-----|-----------------------------|------|----------------|---|

For peer review only

| Review type | Sequence of exclusion after randomization | Reference                                                                                                                                                                                                                                                                             |
|-------------|-------------------------------------------|---------------------------------------------------------------------------------------------------------------------------------------------------------------------------------------------------------------------------------------------------------------------------------------|
| CSR         | 1                                         | Verra Wiebe C, van den Boom Lennard GH, Jacobs W, Clement Darren J, Wymenga Ate AB, Nelissen Rob GHH. Retention versus sacrifice of the posterior cruciate ligament in total knee arthroplasty for treating osteoarthritis. Cochrane Database of Systematic Reviews [Internet]. 2013. |
| CSR         | 2                                         | Anie Kofi A, Massaglia P. Psychological therapies for thalassaemia. Cochrane Database of Systematic Reviews [Internet]. 2014.                                                                                                                                                         |
| CSR         | 3                                         | Wilkinson P, Izmeth Z. Continuation and maintenance treatments for depression in older people. Cochrane Database of Systematic Reviews [Internet]. 2012.                                                                                                                              |
| CSR         | 4                                         | van Dalen Elvira C, van As Jorrit W, de Camargo B. Methotrexate for high-grade osteosarcoma in children and young adults. Cochrane Database of Systematic Reviews [Internet]. 2011.                                                                                                   |
| CSR         | 5                                         | Omar Muhammad I, Alexander Cameron E. Drug treatment for faecal incontinence in adults. Cochrane Database of Systematic Reviews [Internet]. 2013.                                                                                                                                     |
| CSR         | 6                                         | Preston Nancy J, Hurlow A, Brine J, Bennett Michael I. Blood transfusions for anaemia in patients with advanced cancer. Cochrane Database of Systematic Reviews [Internet]. 2012.                                                                                                     |
| CSR         | 7                                         | Skoetz N, Bauer K, Elter T, Monsef I, Roloff V, Hallek M, et al. Alemtuzumab for patients with chronic lymphocytic leukaemia. Cochrane Database of Systematic Reviews [Internet]. 2012.                                                                                               |
| CSR         | 8                                         | Li Luying R, Sydenham E, Chaudhary B, Beecher D, You C. Glucocorticoid with cyclophosphamide for paraquat-induced lung fibrosis. Cochrane Database of Systematic Reviews [Internet]. 2014.                                                                                            |
| CSR         | 9                                         | Ohlsson A, Lacy Janet B. Intravenous immunoglobulin for preventing infection in preterm and/or low birth weight infants. Cochrane Database of Systematic Reviews [Internet]. 2013.                                                                                                    |
| CSR         | 10                                        | Gurusamy Kurinchi S, Giljaca V, Takwoingi Y, Higgie D, Poropat G, Štimac D, et al. Endoscopic retrograde cholangiopancreatography versus intraoperative cholangiography for diagnosis of common bile duct stones. Cochrane Database of Systematic Reviews [Internet]. 2015.           |
| CSR         | 11                                        | Zhang Y, Fang C, Dong Bi R, Wu T, Deng Jue L. Oxygen therapy for pneumonia in adults. Cochrane Database of Systematic Reviews [Internet]. 2012.                                                                                                                                       |
| CSR         | 12                                        | Qureshi Mosarrat J, Kumar M. D-Penicillamine for preventing retinopathy of prematurity in preterm infants. Cochrane Database of Systematic Reviews [Internet]. 2013.                                                                                                                  |
| CSR         | 13                                        | Di Nisio M, Peinemann F, Porreca E, Rutjes Anne WS. Primary prophylaxis for venous thromboembolism in patients undergoing cardiac or thoracic surgery. Cochrane Database of Systematic Reviews [Internet]. 2015.                                                                      |
| CSR         | 14                                        | Tan Hannah B, Danilla S, Murray A, Serra R, El Dib R, Henderson Tom OW, et al. Immunonutrition as an adjuvant therapy for burns. Cochrane Database of Systematic Reviews [Internet]. 2014.                                                                                            |
| CSR         | 15                                        | Hurlow A, Bennett Michael I, Robb Karen A, Johnson Mark I, Simpson Karen H, Oxberry Stephen G. Transcutaneous electric nerve stimulation (TENS) for cancer pain in adults. Cochrane Database of Systematic Reviews [Internet]. 2012.                                                  |
| CSR         | 16                                        | Dong Z, Xu J, Wang Z, Petrov Maxim S. Stents for the prevention of pancreatic fistula following pancreaticoduodenectomy. Cochrane Database of Systematic Reviews [Internet]. 2013.                                                                                                    |
| CSR         | 17                                        | Feagan Brian G, MacDonald John K. Oral 5-aminosalicylic acid for induction of remission in ulcerative colitis. Cochrane Database of Systematic Reviews [Internet]. 2012.                                                                                                              |
| CSR         | 18                                        | Dhiwakar M, Clement WA, Supriya M, McKerrow W. Antibiotics to reduce post-tonsillectomy morbidity. Cochrane Database of Systematic Reviews [Internet]. 2012.                                                                                                                          |
| CSR         | 19                                        | Gal Robin L, Vedula Satyanarayana S, Beck R. Corticosteroids for treating optic neuritis. Cochrane Database of Systematic Reviews [Internet]. 2015.                                                                                                                                   |
| CSR         | 20                                        | Andras A, Sala Tenna A, Crawford F. Vitamin K antagonists or low-molecular-weight heparin for the long term treatment of symptomatic venous thromboembolism. Cochrane Database of Systematic Reviews [Internet]. 2012.                                                                |
| CSR         | 21                                        | Rajaram Sujanthi S, Desai Nayan K, Kalra A, Gajera M, Cavanaugh Susan K, Brampton W, et al. Pulmonary artery catheters for adult patients in intensive care. Cochrane Database of Systematic Reviews [Internet]. 2013.                                                                |
| CSR         | 22                                        | Nelson Richard L, Kelsey P, Leeman H, Meardon N, Patel H, Paul K, et al. Antibiotic treatment for Clostridium difficile-associated diarrhea in adults. Cochrane Database of Systematic Reviews [Internet]. 2011.                                                                      |
| CSR         | 23                                        | Gurion R, Belnik-Plitman Y, Gafter-Gvili A, Paul M, Vidal L, Ben-Bassat I, et al. Colony-stimulating factors for prevention and treatment of infectious complications in patients with acute myelogenous leukemia. Cochrane Database of Systematic Reviews [Internet]. 2012.          |

|     |    |                                                                                                                                                                                                                                                                              |
|-----|----|------------------------------------------------------------------------------------------------------------------------------------------------------------------------------------------------------------------------------------------------------------------------------|
| CSR | 24 | Akl Elie A, Ramly Elie P, Kahale Lara A, Yosuico Victor ED, Barba M, Sperati F, et al. Anticoagulation for people with cancer and central venous catheters. <i>Cochrane Database of Systematic Reviews</i> [Internet]. 2014.                                                 |
| CSR | 25 | Maduwage K, Buckley Nick A, de Silva HJ, Laloo David G, Isbister Geoffrey K. Snake antivenom for snake venom induced consumption coagulopathy. <i>Cochrane Database of Systematic Reviews</i> [Internet]. 2015.                                                              |
| CSR | 26 | Xiao Y, Luo M, Wang J, Luo H. Losigamone add-on therapy for partial epilepsy. <i>Cochrane Database of Systematic Reviews</i> [Internet]. 2012.                                                                                                                               |
| CSR | 27 | Lamers Mieke H, Broekman M, Drenth Joost PH, Gluud C. Aminoadamantanes versus other antiviral drugs for chronic hepatitis C. <i>Cochrane Database of Systematic Reviews</i> [Internet]. 2014.                                                                                |
| CSR | 28 | Elbers Roy G, Verhoef J, van Wegen Erwin EH, Berendse Henk W, Kwakkel G. Interventions for fatigue in Parkinson's disease. <i>Cochrane Database of Systematic Reviews</i> [Internet]. 2015.                                                                                  |
| CSR | 29 | Lodha R, Kabra Sushil K, Pandey Ravindra M. Antibiotics for community-acquired pneumonia in children. <i>Cochrane Database of Systematic Reviews</i> [Internet]. 2013.                                                                                                       |
| CSR | 30 | Thornton J, Rangaraj S. Disease modifying anti-rheumatic drugs in people with cystic fibrosis-related arthritis. <i>Cochrane Database of Systematic Reviews</i> [Internet]. 2012.                                                                                            |
| CSR | 31 | Wong V, Cheuk Daniel KL, Lee S, Chu V. Acupuncture for acute management and rehabilitation of traumatic brain injury. <i>Cochrane Database of Systematic Reviews</i> [Internet]. 2013.                                                                                       |
| CSR | 32 | Li H, Wang J, Li C, Xiao Z. Repetitive transcranial magnetic stimulation (rTMS) for panic disorder in adults. <i>Cochrane Database of Systematic Reviews</i> [Internet]. 2014.                                                                                               |
| CSR | 33 | Allersma T, Farquhar C, Cantineau Astrid EP. Natural cycle in vitro fertilisation (IVF) for subfertile couples. <i>Cochrane Database of Systematic Reviews</i> [Internet]. 2013.                                                                                             |
| CSR | 34 | Johnson N, Bryant A, Miles T, Hogberg T, Cornes P. Adjuvant chemotherapy for endometrial cancer after hysterectomy. <i>Cochrane Database of Systematic Reviews</i> [Internet]. 2011.                                                                                         |
| CSR | 35 | Choo Karen Jui L, Simons FER, Sheikh A. Glucocorticoids for the treatment of anaphylaxis. <i>Cochrane Database of Systematic Reviews</i> [Internet]. 2012.                                                                                                                   |
| CSR | 36 | Ohlsson A, Shah Vibhuti S, Stade Brenda C. Vaginal chlorhexidine during labour to prevent early-onset neonatal group B streptococcal infection. <i>Cochrane Database of Systematic Reviews</i> [Internet]. 2014.                                                             |
| CSR | 37 | Cheng Y, Lu J, Xiong X, Wu S, Lin Y, Wu T, et al. Gases for establishing pneumoperitoneum during laparoscopic abdominal surgery. <i>Cochrane Database of Systematic Reviews</i> [Internet]. 2013.                                                                            |
| CSR | 38 | Zheng J, Fang Y, Cai Bo W, Zhang H, Liu W, Wu B, et al. Intracystic bleomycin for cystic craniopharyngiomas in children. <i>Cochrane Database of Systematic Reviews</i> [Internet]. 2014.                                                                                    |
| CSR | 39 | Tonia T, Mettler A, Robert N, Schwarzer G, Seidenfeld J, Weingart O, et al. Erythropoietin or darbepoetin for patients with cancer. <i>Cochrane Database of Systematic Reviews</i> [Internet]. 2012.                                                                         |
| CSR | 40 | Bricker L, Medley N, Pratt Jeremy J. Routine ultrasound in late pregnancy (after 24 weeks' gestation). <i>Cochrane Database of Systematic Reviews</i> [Internet]. 2015.                                                                                                      |
| CSR | 41 | Lin X, Lu J, Yang M, Dong Bi R, Wu Hong M. Macrolides for diffuse panbronchiolitis. <i>Cochrane Database of Systematic Reviews</i> [Internet]. 2015.                                                                                                                         |
| CSR | 42 | Gurusamy Kurinchi S, Nagendran M, Broadhurst Jack F, Anker Stefan D, Richards T. Iron therapy in anaemic adults without chronic kidney disease. <i>Cochrane Database of Systematic Reviews</i> [Internet]. 2014.                                                             |
| CSR | 43 | El Dib R, Gameiro Orsi LF, Ogata Matheus SP, Módolo Norma SP, Braz Leandro G, Jorge Eliane C, et al. Zinc supplementation for the prevention of type 2 diabetes mellitus in adults with insulin resistance. <i>Cochrane Database of Systematic Reviews</i> [Internet]. 2015. |
| CSR | 44 | La Mantia L, Di Pietrantonj C, Rovaris M, Rigon G, Frau S, Berardo F, et al. Interferon-beta versus glatiramer acetate for relapsing-remitting multiple sclerosis. <i>Cochrane Database of Systematic Reviews</i> [Internet]. 2014.                                          |
| CSR | 45 | Zhao S, Sampson S, Xia J, Jayaram Mahesh B. Psychoeducation (brief) for people with serious mental illness. <i>Cochrane Database of Systematic Reviews</i> [Internet]. 2015.                                                                                                 |
| CSR | 46 | Gluud Lise L, Dam G, Les I, Córdoba J, Marchesini G, Borre M, et al. Branched-chain amino acids for people with hepatic encephalopathy. <i>Cochrane Database of Systematic Reviews</i> [Internet]. 2015.                                                                     |
| CSR | 47 | Mason M, Welsh Emma J, Smith I. Drug therapy for obstructive sleep apnoea in adults. <i>Cochrane Database of Systematic Reviews</i> [Internet]. 2013.                                                                                                                        |
| CSR | 48 | Tanaka Y, Nakayama T, Nishimori M, Tsujimura Y, Kawaguchi M, Sato Y. Lidocaine for preventing postoperative sore throat. <i>Cochrane Database of Systematic Reviews</i> [Internet]. 2015.                                                                                    |
| CSR | 49 | Petrucchi N, De Feo C. Lung protective ventilation strategy for the acute respiratory distress syndrome. <i>Cochrane Database of Systematic Reviews</i> [Internet]. 2013.                                                                                                    |
| CSR | 50 | Mehrholtz J, Kugler J, Pohl M. Locomotor training for walking after spinal cord injury. <i>Cochrane Database of Systematic Reviews</i> [Internet]. 2012.                                                                                                                     |
| CSR | 51 | Xander C, Meerpohl Joerg J, Galandi D, Buroh S, Schwarzer G, Antes G, et al. Pharmacological interventions for pruritus in adult palliative care patients. <i>Cochrane Database of Systematic Reviews</i> [Internet]. 2013.                                                  |
| CSR | 52 | Pammi M, Abrams Steven A. Oral lactoferrin for the treatment of sepsis and necrotizing enterocolitis in neonates. <i>Cochrane Database of Systematic Reviews</i> [Internet]. 2011.                                                                                           |



|     |    |                                                                                                                                                                                                                                                                                                                                                                           |
|-----|----|---------------------------------------------------------------------------------------------------------------------------------------------------------------------------------------------------------------------------------------------------------------------------------------------------------------------------------------------------------------------------|
| CSR | 53 | Eliakim-Raz N, Robenshtok E, Shefet D, Gafter-Gvili A, Vidal L, Paul M, et al. Empiric antibiotic coverage of atypical pathogens for community-acquired pneumonia in hospitalized adults. <i>Cochrane Database of Systematic Reviews</i> [Internet]. 2012.                                                                                                                |
| CSR | 54 | Hsu Charlie CT, Kwan Gigi NC, Thompson Shane A, Evans-Barns H, van Driel Mieke L. Embolisation for pulmonary arteriovenous malformation. <i>Cochrane Database of Systematic Reviews</i> [Internet]. 2015.                                                                                                                                                                 |
| CSR | 55 | Evans Jennifer R, Lawrenson John G. Antioxidant vitamin and mineral supplements for slowing the progression of age-related macular degeneration. <i>Cochrane Database of Systematic Reviews</i> [Internet]. 2012.                                                                                                                                                         |
| CSR | 56 | Stanton Tasha R, Wand Benedict M, Carr Daniel B, Birklein F, Wasner Gunnar L, O'Connell Neil E. Local anaesthetic sympathetic blockade for complex regional pain syndrome. <i>Cochrane Database of Systematic Reviews</i> [Internet]. 2013.                                                                                                                               |
| CSR | 57 | Afshari A, Wikkelso A, Brok J, Møller Ann M, Wetterslev J. Thrombelastography (TEG) or thromboelastometry (ROTEM) to monitor haemotherapy versus usual care in patients with massive transfusion. <i>Cochrane Database of Systematic Reviews</i> [Internet]. 2011.                                                                                                        |
| CSR | 58 | Zhou Q, Zheng J, Yu L, Jia X. Pregabalin monotherapy for epilepsy. <i>Cochrane Database of Systematic Reviews</i> [Internet]. 2012.                                                                                                                                                                                                                                       |
| CSR | 59 | Kumbargere Nagraj S, Naresh S, Srinivas K, Renjith George P, Shrestha A, Levenson D, et al. Interventions for the management of taste disturbances. <i>Cochrane Database of Systematic Reviews</i> [Internet]. 2014.                                                                                                                                                      |
| CSR | 60 | Fernandes Ricardo M, Bialy Liza M, Vandermeer B, Tjosvold L, Plint Amy C, Patel H, et al. Glucocorticoids for acute viral bronchiolitis in infants and young children. <i>Cochrane Database of Systematic Reviews</i> [Internet]. 2013.                                                                                                                                   |
| CSR | 61 | Meerpohl Joerg J, Antes G, Rücker G, Fleeman N, Motschall E, Niemeyer Charlotte M, et al. Deferasirox for managing iron overload in people with thalassaemia. <i>Cochrane Database of Systematic Reviews</i> [Internet]. 2012.                                                                                                                                            |
| CSR | 62 | Andriolo Brenda NG, Andriolo Régis B, Saconato H, Atallah Álvaro N, Valente O. Early versus late tracheostomy for critically ill patients. <i>Cochrane Database of Systematic Reviews</i> [Internet]. 2015.                                                                                                                                                               |
| CSR | 63 | Magni Laura R, Purgato M, Gastaldon C, Papola D, Furukawa Toshi A, Cipriani A, et al. Fluoxetine versus other types of pharmacotherapy for depression. <i>Cochrane Database of Systematic Reviews</i> [Internet]. 2013.                                                                                                                                                   |
| CSR | 64 | Ricci S, Dinia L, Del Sette M, Anzola P, Mazzoli T, Cenciarelli S, et al. Sonothrombolysis for acute ischaemic stroke. <i>Cochrane Database of Systematic Reviews</i> [Internet]. 2012.                                                                                                                                                                                   |
| CSR | 65 | Fisher Sheila A, Zhang H, Doree C, Mathur A, Martin-Rendon E. Stem cell treatment for acute myocardial infarction. <i>Cochrane Database of Systematic Reviews</i> [Internet]. 2015.                                                                                                                                                                                       |
| CSR | 66 | Daniels T, Mills N, Whitaker P. Nebuliser systems for drug delivery in cystic fibrosis. <i>Cochrane Database of Systematic Reviews</i> [Internet]. 2013.                                                                                                                                                                                                                  |
| CSR | 67 | Sickinger M-T, von Tresckow B, Kobe C, Engert A, Borchmann P, Skoetz N. Positron emission tomography-adapted therapy for first-line treatment in individuals with Hodgkin lymphoma. <i>Cochrane Database of Systematic Reviews</i> [Internet]. 2015.                                                                                                                      |
| CSR | 68 | Kavirajan Harish C, Lueck K, Chuang K. Alternating current cranial electrotherapy stimulation (CES) for depression. <i>Cochrane Database of Systematic Reviews</i> [Internet]. 2014.                                                                                                                                                                                      |
| CSR | 69 | Gupta Aditya K, Paquet M, Villanueva E, Brintnell W. Interventions for actinic keratoses. <i>Cochrane Database of Systematic Reviews</i> [Internet]. 2012.                                                                                                                                                                                                                |
| CSR | 70 | Khasraw M, Ameratunga Malaka S, Grant R, Wheeler H, Pavlakis N. Antiangiogenic therapy for high-grade glioma. <i>Cochrane Database of Systematic Reviews</i> [Internet]. 2014.                                                                                                                                                                                            |
| CSR | 71 | Leucht C, Huhn M, Leucht S. Amitriptyline versus placebo for major depressive disorder. <i>Cochrane Database of Systematic Reviews</i> [Internet]. 2012.                                                                                                                                                                                                                  |
| CSR | 72 | Malanda Uriëll L, Welschen Laura MC, Riphagen Ingrid I, Dekker Jacqueline M, Nijpels G, Bot Sandra DM. Self-monitoring of blood glucose in patients with type 2 diabetes mellitus who are not using insulin. <i>Cochrane Database of Systematic Reviews</i> [Internet]. 2012.                                                                                             |
| CSR | 73 | Povlsen B, Hansson T, Povlsen Sebastian D. Treatment for thoracic outlet syndrome. <i>Cochrane Database of Systematic Reviews</i> [Internet]. 2014.                                                                                                                                                                                                                       |
| CSR | 74 | Hofstede Stefanie N, Nouta Klaas A, Jacobs W, van Hooff Miranda L, Wymenga Ate B, Pijls Bart G, et al. Mobile bearing vs fixed bearing prostheses for posterior cruciate retaining total knee arthroplasty for postoperative functional status in patients with osteoarthritis and rheumatoid arthritis. <i>Cochrane Database of Systematic Reviews</i> [Internet]. 2015. |
| CSR | 75 | Visser J, Snel M, Van Vliet Huib AAM. Hormonal versus non-hormonal contraceptives in women with diabetes mellitus type 1 and 2. <i>Cochrane Database of Systematic Reviews</i> [Internet]. 2013.                                                                                                                                                                          |
| CSR | 76 | Kleinstäuber M, Witthöft M, Steffanowski A, van Marwijk H, Hiller W, Lambert Michael J. Pharmacological interventions for somatoform disorders in adults. <i>Cochrane Database of Systematic Reviews</i> [Internet]. 2014.                                                                                                                                                |
| CSR | 77 | Anderson-James S, Marchant Julie M, Acworth Jason P, Turner C, Chang Anne B. Inhaled corticosteroids for subacute cough in children. <i>Cochrane Database of Systematic Reviews</i> [Internet]. 2013.                                                                                                                                                                     |
| CSR | 78 | Tramm R, Ilic D, Davies Andrew R, Pellegrino Vincent A, Romero L, Hodgson C. Extracorporeal membrane oxygenation for critically ill adults. <i>Cochrane Database of Systematic Reviews</i> [Internet]. 2015.                                                                                                                                                              |

|    |     |     |                                                                                                                                                                                                                                                                                                                          |
|----|-----|-----|--------------------------------------------------------------------------------------------------------------------------------------------------------------------------------------------------------------------------------------------------------------------------------------------------------------------------|
| 1  |     |     |                                                                                                                                                                                                                                                                                                                          |
| 2  |     |     |                                                                                                                                                                                                                                                                                                                          |
| 3  |     |     |                                                                                                                                                                                                                                                                                                                          |
| 4  | CSR | 79  | Scholefield B, Duncan H, Davies P, Gao Smith F, Khan K, Perkins Gavin D, et al. Hypothermia for neuroprotection in children after cardiopulmonary arrest. Cochrane Database of Systematic Reviews [Internet]. 2013.                                                                                                      |
| 5  |     |     |                                                                                                                                                                                                                                                                                                                          |
| 6  | CSR | 80  | Prabhu Rama KR, Swaminathan N, Harvey Lisa A. Passive movements for the treatment and prevention of contractures. Cochrane Database of Systematic Reviews [Internet]. 2013.                                                                                                                                              |
| 7  |     |     |                                                                                                                                                                                                                                                                                                                          |
| 8  | CSR | 81  | Kew Kayleigh M, Undela K, Kotorts I, Ferrara G. Macrolides for chronic asthma. Cochrane Database of Systematic Reviews [Internet]. 2015.                                                                                                                                                                                 |
| 9  |     |     |                                                                                                                                                                                                                                                                                                                          |
| 10 | CSR | 82  | Segal D, MacDonald John K, Chande N. Low dose naltrexone for induction of remission in Crohn's disease. Cochrane Database of Systematic Reviews [Internet]. 2014.                                                                                                                                                        |
| 11 |     |     |                                                                                                                                                                                                                                                                                                                          |
| 12 | CSR | 83  | Boonmak P, Boonmak S, Pattanittum P. High initial concentration versus low initial concentration sevoflurane for inhalational induction of anaesthesia. Cochrane Database of Systematic Reviews [Internet]. 2012.                                                                                                        |
| 13 |     |     |                                                                                                                                                                                                                                                                                                                          |
| 14 | CSR | 84  | Hunt H, Stanworth S, Curry N, Woolley T, Cooper C, Ukoumunne O, et al. Thromboelastography (TEG) and rotational thromboelastometry (ROTEM) for trauma-induced coagulopathy in adult trauma patients with bleeding. Cochrane Database of Systematic Reviews [Internet]. 2015.                                             |
| 15 |     |     |                                                                                                                                                                                                                                                                                                                          |
| 16 | CSR | 85  | Ells Louisa J, Mead E, Atkinson G, Corpeleijn E, Roberts K, Viner R, et al. Surgery for the treatment of obesity in children and adolescents. Cochrane Database of Systematic Reviews [Internet]. 2015.                                                                                                                  |
| 17 |     |     |                                                                                                                                                                                                                                                                                                                          |
| 18 | CSR | 86  | Ali A, Hall I, Blickwedel J, Hassiotis A. Behavioural and cognitive-behavioural interventions for outwardly-directed aggressive behaviour in people with intellectual disabilities. Cochrane Database of Systematic Reviews [Internet]. 2015.                                                                            |
| 19 |     |     |                                                                                                                                                                                                                                                                                                                          |
| 20 | CSR | 87  | Kiwanuka Suzanne N, Rutebemberwa E, Nalwadda C, Okui O, Ssenooba F, Kinengyere Alison A, et al. Interventions to manage dual practice among health workers. Cochrane Database of Systematic Reviews [Internet]. 2011.                                                                                                    |
| 21 |     |     |                                                                                                                                                                                                                                                                                                                          |
| 22 | CSR | 88  | Vasudev A, Macritchie K, Rao Sanjay NK, Geddes J, Young Allan H. Tiagabine in the maintenance treatment of bipolar disorder. Cochrane Database of Systematic Reviews [Internet]. 2011.                                                                                                                                   |
| 23 |     |     |                                                                                                                                                                                                                                                                                                                          |
| 24 | CSR | 89  | Daly C, Cody June D, Khan I, Rabindranath Kannaiyan S, Vale L, Wallace Sheila A. Double bag or Y-set versus standard transfer systems for continuous ambulatory peritoneal dialysis in end-stage kidney disease. Cochrane Database of Systematic Reviews [Internet]. 2014.                                               |
| 25 |     |     |                                                                                                                                                                                                                                                                                                                          |
| 26 | CSR | 90  | Saldanha Ian J, Akinyede O, Robinson Karen A. Immunosuppressive drug therapy for preventing rejection following lung transplantation in cystic fibrosis. Cochrane Database of Systematic Reviews [Internet]. 2013.                                                                                                       |
| 27 |     |     |                                                                                                                                                                                                                                                                                                                          |
| 28 | CSR | 91  | Bradt J, Dileo C, Shim M. Music interventions for preoperative anxiety. Cochrane Database of Systematic Reviews [Internet]. 2013.                                                                                                                                                                                        |
| 29 |     |     |                                                                                                                                                                                                                                                                                                                          |
| 30 | CSR | 92  | Jacobs W, Van der Gaag Niels A, Tuschel A, de Kleuver M, Peul W, Verbout AJ, et al. Total disc replacement for chronic back pain in the presence of disc degeneration. Cochrane Database of Systematic Reviews [Internet]. 2012.                                                                                         |
| 31 |     |     |                                                                                                                                                                                                                                                                                                                          |
| 32 | CSR | 93  | Wakai A, O'Sullivan R, McCabe A. Intra-articular lignocaine versus intravenous analgesia with or without sedation for manual reduction of acute anterior shoulder dislocation in adults. Cochrane Database of Systematic Reviews [Internet]. 2011.                                                                       |
| 33 |     |     |                                                                                                                                                                                                                                                                                                                          |
| 34 | CSR | 94  | Chang Zhi H, Liu Zhao Y. Subintimal angioplasty for chronic lower limb arterial occlusion. Cochrane Database of Systematic Reviews [Internet]. 2013.                                                                                                                                                                     |
| 35 |     |     |                                                                                                                                                                                                                                                                                                                          |
| 36 | CSR | 95  | Moja L, Lucenteforte E, Kwag Koren H, Bertele V, Campomori A, Chakravarthy U, et al. Systemic safety of bevacizumab versus ranibizumab for neovascular age-related macular degeneration. Cochrane Database of Systematic Reviews [Internet]. 2014.                                                                       |
| 37 |     |     |                                                                                                                                                                                                                                                                                                                          |
| 38 | CSR | 96  | Robertson L, Roche A. Primary prophylaxis for venous thromboembolism in people undergoing major amputation of the lower extremity. Cochrane Database of Systematic Reviews [Internet]. 2013.                                                                                                                             |
| 39 |     |     |                                                                                                                                                                                                                                                                                                                          |
| 40 | CSR | 97  | Magula N, Dediccoat M. Low dose versus high dose stavudine for treating people with HIV infection. Cochrane Database of Systematic Reviews [Internet]. 2015.                                                                                                                                                             |
| 41 |     |     |                                                                                                                                                                                                                                                                                                                          |
| 42 | CSR | 98  | Ghamami N, Chiang Sandy Hsiang Y, Dormuth C, Wright James M. Time course for blood pressure lowering of dihydropyridine calcium channel blockers. Cochrane Database of Systematic Reviews [Internet]. 2014.                                                                                                              |
| 43 |     |     |                                                                                                                                                                                                                                                                                                                          |
| 44 | SR  | 99  | Sculean A, Nikolidakis D, Nikou G, Ivanovic A, Chapple ILC, Stavropoulos A. Biomaterials for promoting periodontal regeneration in human intrabony defects: a systematic review. Periodontology 2000. 2015;68(1):182-216.                                                                                                |
| 45 |     |     |                                                                                                                                                                                                                                                                                                                          |
| 46 | SR  | 100 | Bright R, Hynes K, Gronthos S, Bartold PM. Periodontal ligament-derived cells for periodontal regeneration in animal models: a systematic review. Journal Of Periodontal Research. 2015;50(2):160-72.                                                                                                                    |
| 47 |     |     |                                                                                                                                                                                                                                                                                                                          |
| 48 | SR  | 101 | Hernandez AV, Usmani A, Rajamanickam A, Moheet A. Thiazolidinediones and risk of heart failure in patients with or at high risk of type 2 diabetes mellitus: A meta-analysis and meta-regression analysis of placebo-controlled randomized clinical trials. American Journal of Cardiovascular Drugs. 2011;11(2):115-28. |
| 49 |     |     |                                                                                                                                                                                                                                                                                                                          |
| 50 | SR  | 102 | Valery PC, Moore SP, Meiklejohn J, Bray F. International variations in childhood cancer in indigenous populations: A systematic review. The Lancet Oncology. 2014;15(2):e90-103.                                                                                                                                         |
| 51 |     |     |                                                                                                                                                                                                                                                                                                                          |
| 52 | SR  | 103 | Kim SH, Stoicea N, Soghomonyan S, Bergese SD. Remifentanyl-Acute opioid tolerance and opioid-induced hyperalgesia: A systematic review. American Journal of Therapeutics. 2015;22(3):e62-e74.                                                                                                                            |
| 53 |     |     |                                                                                                                                                                                                                                                                                                                          |
| 54 |     |     |                                                                                                                                                                                                                                                                                                                          |
| 55 |     |     |                                                                                                                                                                                                                                                                                                                          |
| 56 |     |     |                                                                                                                                                                                                                                                                                                                          |
| 57 |     |     |                                                                                                                                                                                                                                                                                                                          |
| 58 |     |     |                                                                                                                                                                                                                                                                                                                          |
| 59 |     |     |                                                                                                                                                                                                                                                                                                                          |
| 60 |     |     |                                                                                                                                                                                                                                                                                                                          |

|    |     |                                                                                                                                                                                                                                                                                                                                                                                 |
|----|-----|---------------------------------------------------------------------------------------------------------------------------------------------------------------------------------------------------------------------------------------------------------------------------------------------------------------------------------------------------------------------------------|
| SR | 104 | Xiao X, Li L, Feng Y, Jiang YS, He QW, Tan XG, et al. Sevoflurane in the anesthesia of child short period surgery: A systematic review. <i>Chinese Journal of Evidence-Based Medicine</i> . 2011;11(10):1184-91.                                                                                                                                                                |
| SR | 105 | Ranjan A, Penninga E, Jelsig AM, Hasselbalch HC, Bjerrum OW. Inheritance of the chronic myeloproliferative neoplasms. A systematic review. <i>Clinical Genetics</i> . 2013;83(2):99-107.                                                                                                                                                                                        |
| SR | 106 | Usenbo A, Kramer V, Young T, Musekiwa A. Prevalence of arthritis in Africa: A systematic review and meta-analysis. <i>PLoS ONE</i> . 2015;10(8).                                                                                                                                                                                                                                |
| SR | 107 | Siebert W. Adhesions after previous cesarean section. Meta-analysis and systematic review. <i>Gynakologische Praxis</i> . 2012;36(2):336.                                                                                                                                                                                                                                       |
| SR | 108 | Drake MT, Murad MH, Mauck KF, Lane MA, Undavalli C, Elraiyah T, et al. Risk factors for low bone mass-related fractures in men: A systematic review and meta-analysis. <i>Journal of Clinical Endocrinology and Metabolism</i> . 2012;97(6):1861-70.                                                                                                                            |
| SR | 109 | Butler EN, Chawla N, Lund J, Harlan LC, Warren JL, Yabroff KR. Patterns of colorectal cancer care in the United States and Canada: A systematic review. <i>Journal of the National Cancer Institute</i> . 2013. p. 13-35.                                                                                                                                                       |
| SR | 110 | Montin L, Koivisto JM. Effectiveness of self-directed learning methods compared with other learning methods in nursing education related to nursing students' or registered nurses' learning outcomes: A systematic review protocol. <i>Journal of Systematic Reviews and Implementation Reports</i> . 2014;12(2):1-8.                                                          |
| SR | 111 | Jindal A, Bal A, Agarwal R. Inflammatory myofibroblastic tumor of the trachea in the pediatric age group: Case report and systematic review of the literature. <i>Journal of Bronchology and Interventional Pulmonology</i> . 2015;22(1):58-65.                                                                                                                                 |
| SR | 112 | Baldwin C, Brusco NK. The effect of vocational rehabilitation on return-to-work rates post stroke: A systematic review. <i>Topics in Stroke Rehabilitation</i> . 2011;18(5):562-72.                                                                                                                                                                                             |
| SR | 113 | Sundar S, Wu J, Hillaby K, Yap J, Lilford R. A systematic review evaluating the relationship between progression free survival and post progression survival in advanced ovarian cancer. <i>Gynecologic Oncology</i> . 2012;125(2):493-9.                                                                                                                                       |
| SR | 114 | Detjen AK, DiNardo AR, Leyden J, Steingart KR, Menzies D, Schiller I, et al. Xpert MTB/RIF for the diagnosis of tuberculosis in children-a systematic review and meta-analysis. <i>American Journal of Tropical Medicine and Hygiene</i> . 2013;89(5):418-9.                                                                                                                    |
| SR | 115 | Bellemain-Appaix A, O'Connor SA, Silvain J, Cucherat M, Beygui F, Barthélémy O, et al. Association of clopidogrel pretreatment with mortality, cardiovascular events, and major bleeding among patients undergoing percutaneous coronary intervention: A systematic review and meta-analysis. <i>JAMA - Journal of the American Medical Association</i> . 2012;308(23):2507-17. |
| SR | 116 | Liese J, Ulrich F, Schreckenbach T, Wahle M, Zeuzem S, Bechstein WO, et al. A rare cause of acute liver failure: Adult onset still's disease-case report and systematic review of the literature. <i>Transplant International</i> . 2011;24:237.                                                                                                                                |
| SR | 117 | Davie A, Damera V, Bianic F, Ricci J, Bernhardt P, Gokhale S, et al. CNI-related renal impairment in liver transplantation: A comparison of cyclosporine and tacrolimus-based regimens. <i>American Journal of Transplantation</i> . 2013;13:533.                                                                                                                               |
| SR | 118 | Loar J. Diagnostic accuracy and radiation dose of CT coronary angiography in atrial fibrillation: Systematic review and meta-analysis: Vorre MM, Abdulla J. <i>Radiology</i> 2013;267:376-86. <i>Journal of Emergency Medicine</i> . 2013;45(2):308.                                                                                                                            |
| SR | 119 | Sharma V, Deo SV, Altarabsheh SE, Cho YH, Erwin PJ, Park SJ. Comparison of the early haemodynamics of stented pericardial and porcine aortic valves. <i>European Journal of Cardio-thoracic Surgery</i> . 2014;47(1):4-10.                                                                                                                                                      |
| SR | 120 | Van Tuyl LH, Lems WF, Boers M. Measurement of stiffness in patients with rheumatoid arthritis in low disease activity or remission: A systematic review. <i>BMC Musculoskeletal Disorders</i> . 2014;15(1).                                                                                                                                                                     |
| SR | 121 | Shumay D, Del Gaudio F, Melisko M, Dunn L. Factors related to fear of recurrence in breast cancer survivors. <i>Psycho-Oncology</i> . 2013;22:134.                                                                                                                                                                                                                              |
| SR | 122 | Rawlinson A, Kitchingham N, Hart C, McMahon G, Ong SL, Khanna A. Mechanisms of reducing postoperative pain, nausea and vomiting: A systematic review of current techniques. <i>Evidence-Based Medicine</i> . 2012;17(3):75-80.                                                                                                                                                  |
| SR | 123 | Chen L, Xiao-Qing Z, Qin L, Hong W. Influencing factors related to sun protection in children and adolescents: A systematic review. <i>Chinese Journal of Evidence-Based Medicine</i> . 2014;14(12):1429-33.                                                                                                                                                                    |
| SR | 124 | Qin SY, Jiang HX, Ning HJ, Nie HM, Tao L, Hu BL, et al. Effect of Helicobacter pylori eradication on blood ammonia levels in cirrhotic patients: A systematic review. <i>Hepato-Gastroenterology</i> . 2012;59(120):2576-81.                                                                                                                                                    |
| SR | 125 | Müller SA, Vavken P, Pagenstert G. Simulated activity but real trauma: A systematic review on nintendo wii injuries based on a case report of an acute anterior cruciate ligament rupture. <i>Medicine (United States)</i> . 2015;94(12):e648.                                                                                                                                  |
| SR | 126 | Kim S-H, Lilot M, Sidhu KS, Rinehart J, Yu Z, Canales C, et al. Accuracy and precision of continuous noninvasive arterial pressure monitoring compared with invasive arterial pressure: a systematic review and meta-analysis. <i>Anesthesiology</i> . 2014;120(5):1080-97.                                                                                                     |
| SR | 127 | Nickerson JW, Chackungal S, Knowlton L, McQueen K, Burkle FM. Surgical care during humanitarian crises: a systematic review of published surgical caseload data from foreign medical teams. <i>Prehospital And Disaster Medicine</i> . 2012;27(2):184-9.                                                                                                                        |
| SR | 128 | Zulman DM, Sussman JB, Chen X, Cigolle CT, Blaum CS, Hayward RA. Examining the evidence: A systematic review of the inclusion and analysis of older adults in randomized controlled trials. <i>Journal of General Internal Medicine</i> . 2011;26(7):783-90.                                                                                                                    |
| SR | 129 | Singh S, Venkatesh SK, Wang Z, Miller FH, Motosugi U, Low RN, et al. Diagnostic performance of magnetic resonance elastography in staging liver fibrosis: A systematic                                                                                                                                                                                                          |

|    |     |                                                                                                                                                                                                                                                                                                                              |
|----|-----|------------------------------------------------------------------------------------------------------------------------------------------------------------------------------------------------------------------------------------------------------------------------------------------------------------------------------|
|    |     | review and meta-analysis of individual participant data. <i>Clinical Gastroenterology and Hepatology</i> . 2015;13(3):440-51.                                                                                                                                                                                                |
| SR | 130 | Hergan D, Thut D, Sherman O, Day MS. Meniscal allograft transplantation. <i>Arthroscopy - Journal of Arthroscopic and Related Surgery</i> . 2011;27(1):101-12.                                                                                                                                                               |
| SR | 131 | Gong Z, Zhao D. Cardiovascular diseases and risk factors among Chinese immigrants. <i>Internal And Emergency Medicine</i> . 2015.                                                                                                                                                                                            |
| SR | 132 | Jordan SJ, Nagle CM, Coory MD, Maresco D, Protani MM, Pandeya NA, et al. Has the association between hysterectomy and ovarian cancer changed over time? A systematic review and meta-analysis. <i>European Journal of Cancer</i> . 2013;49(17):3638-47.                                                                      |
| SR | 133 | Lalidou F, Kolios G, Tavridou A, Drosos GI. Bone grafts as carriers for local antibiotic delivery for the treatment and prevention of bone infections. <i>Surgical Technology International</i> . 2014;25:239-45.                                                                                                            |
| SR | 134 | Cheng S, Grasso L, Martinez-Orozco JA, Al-Agha R, Pivonello R, Colao A, et al. Pregnancy in acromegaly: Experience from two referral centers and systematic review of the literature. <i>Clinical Endocrinology</i> . 2012;76(2):264-71.                                                                                     |
| SR | 135 | Wu F, Weng S, Li C, Sun J, Li L, Gao Q. Submandibular gland transfer for the prevention of postradiation xerostomia in patients with head and neck cancer: A systematic review and meta-analysis. <i>ORL</i> . 2015;77(2):70-86.                                                                                             |
| SR | 136 | Torné R, Rodríguez-Hernández A, Bernard T, Arian Abelló F, Vilalta Castan J, Sahuquillo J. Subarachnoid hemorrhage in systemic lupus erythematosus: Systematic review and report of three cases. <i>Clinical Neurology and Neurosurgery</i> . 2015;128:17-24.                                                                |
| SR | 137 | Jokiniemi K, Pietilä A-M, Kylmä J, Haatainen K. Advanced nursing roles: a systematic review. <i>Nursing &amp; Health Sciences</i> . 2012;14(3):421-31.                                                                                                                                                                       |
| SR | 138 | Gerstner D, Walser S, Brenner B, Büniger J, Eikmann T, Raulf-Heimsoth M, et al. Health relevance of exposure to bioaerosols. <i>Allergologie</i> . 2014;37(5):190-7.                                                                                                                                                         |
| SR | 139 | Kurth E, Kennedy HP, Spichiger E, Hösli I, Zemp Stutz E. Crying babies, tired mothers: What do we know? A systematic review. <i>Midwifery</i> . 2011;27(2):187-94.                                                                                                                                                           |
| SR | 140 | Cook DA, Brydges R, Zendejas B, Hamstra SJ, Hatala R. Technology-enhanced simulation to assess health professionals: A systematic review of validity evidence, research methods, and reporting quality. <i>Academic Medicine</i> . 2013;88(6):872-83.                                                                        |
| SR | 141 | Xia L, Wang X, Xu T, Zhang X, Zhu Z, Qin L, et al. Robotic versus open radical cystectomy: An updated systematic review and meta-analysis. <i>PLoS ONE</i> . 2015;10(3).                                                                                                                                                     |
| SR | 142 | Taylor RS, Desai MJ, Rigoard P, Taylor RJ. Predictors of pain relief following spinal cord stimulation in chronic back and leg pain and failed back surgery syndrome: A systematic review and meta-regression analysis. <i>Pain Practice</i> . 2014;14(6):489-505.                                                           |
| SR | 143 | Manouchehri N, Birch DW, Shi X, Hadi G, Karmali S. Heated versus cold insufflation for minimally invasive abdominal surgery has minimal benefit on patient outcomes. <i>Surgical Endoscopy and Other Interventional Techniques</i> . 2011;25:S346.                                                                           |
| SR | 144 | Chiappini E, Accetta G, Bonsignori F, Boddp V, Galli L, Biggeri A, et al. Interferon-γ release assays for the diagnosis of mycobacterium tuberculosis infection in children: A systematic review and meta-analysis. <i>International Journal of Immunopathology and Pharmacology</i> . 2012;25(3):557-64.                    |
| SR | 145 | Carson SJ. Limited evidence for existing caries assessment systems. <i>Evidence-Based Dentistry</i> . 2013;14(1):10-1.                                                                                                                                                                                                       |
| SR | 146 | Siriwardhana C, Ali SS, Roberts B, Stewart R. A systematic review of resilience and mental health outcomes of conflict-driven adult forced migrants. <i>Conflict And Health</i> . 2014;8:13.                                                                                                                                 |
| SR | 147 | Chamberlain C, McNamara B, Williams ED, Yore D, Oldenburg B, Oats J, et al. Diabetes in pregnancy among indigenous women in australia, canada, new zealand and the united states: A systematic review of the evidence for screening in early pregnancy. <i>Diabetes/Metabolism Research and Reviews</i> . 2013;29(4):241-56. |
| SR | 148 | Leadley RM, Armstrong N, Lee YC, Allen A, Kleijnen J. Chronic diseases in the European Union: The prevalence and health cost implications of chronic pain. <i>Journal of Pain and Palliative Care Pharmacotherapy</i> . 2012;26(4):310-25.                                                                                   |
| SR | 149 | Xiangjun K. To ensure all ward 22a patients on atypical antipsychotics are monitored according to protocol. <i>Annals of the Academy of Medicine Singapore</i> . 2012;41(9):S181.                                                                                                                                            |
| SR | 150 | Weatherley ND, Jackson PR. The new Sheffield risk and benefit tables for the elderly. <i>QJM</i> . 2011;104(1):3-12.                                                                                                                                                                                                         |
| SR | 151 | Srigley JA, Lightfoot D, Fernie G, Gardam M, Muller MP. Hand hygiene monitoring technology: protocol for a systematic review. <i>Systematic reviews</i> . 2013;2:101.                                                                                                                                                        |
| SR | 152 | Morgan JL, Thomas K, Braungart S, Nelson RL. Transparent cap colonoscopy versus standard colonoscopy: A systematic review and meta-analysis. <i>Techniques in Coloproctology</i> . 2013;17(4):353-60.                                                                                                                        |
| SR | 153 | Hahn A, Jochai D, Caufield-Noll C, Rios R, Allen L, Cordts G. Self inflicted burns: A systematic review of the literature. <i>Journal of Burn Care and Research</i> . 2012;33(2):S181.                                                                                                                                       |
| SR | 154 | <i>Canadian Respiratory Journal</i> . 2013;20(2).                                                                                                                                                                                                                                                                            |
| SR | 155 | Dawe SR, Windsor JA, Broeders JA, Cregan PC, Hewett PJ, Maddern GJ. A systematic review of surgical skills transfer after simulation-based training: Laparoscopic cholecystectomy and endoscopy. <i>Annals of Surgery</i> . 2014;259(2):236-48.                                                                              |
| SR | 156 | Xiong C, Liu G, Ma R, Xue J, Wu A. Efficacy of palonosetron for preventing postoperative nausea and vomiting: a systematic review and meta-analysis. <i>Canadian Journal of Anesthesia</i> . 2015.                                                                                                                           |
| SR | 157 | O'Horo JC, Silva GLM, Silvia Munoz-Price L, Safdar N. The efficacy of daily bathing with chlorhexidine for reducing healthcare-associated bloodstream infections: A meta-analysis. <i>Infection Control and Hospital Epidemiology</i> . 2012;33(3):257-67.                                                                   |



|    |     |                                                                                                                                                                                                                                                                              |
|----|-----|------------------------------------------------------------------------------------------------------------------------------------------------------------------------------------------------------------------------------------------------------------------------------|
| SR | 158 | Rehm J, Kailasapillai S, Larsen E, Rehm MX, Samokhvalov AV, Shield KD, et al. A systematic review of the epidemiology of unrecorded alcohol consumption and the chemical composition of unrecorded alcohol. <i>Addiction (Abingdon, England)</i> . 2014;109(6):880-93.       |
| SR | 159 | Schadewaldt V, McInnes E, Hiller JE, Gardner A. Views and experiences of nurse practitioners and medical practitioners with collaborative practice in primary health care - an integrative review. <i>BMC Family Practice</i> . 2013;14:132-.                                |
| SR | 160 | Hao Z, Yang C, Liu M, Wu B. Renal dysfunction and thrombolytic therapy in patients with acute ischemic stroke: A systematic review and meta-analysis. <i>Medicine (United States)</i> . 2014;93(28):e286.                                                                    |
| SR | 161 | Kishi T, Matsunaga S, Iwata N. Suvorexant for primary insomnia: A systematic review and meta-analysis of randomized placebo-controlled trials. <i>PLoS ONE</i> . 2015;10(8).                                                                                                 |
| SR | 162 | Jones CJ, Smith HE, Llewellyn CD. A systematic review of the effectiveness of interventions using the Common Sense Self-Regulatory Model to improve adherence behaviours. <i>Journal Of Health Psychology</i> . 2015.                                                        |
| SR | 163 | White A. Outpatient interventions for hepatology patients with fluid retention: a review and synthesis of the literature. <i>Gastroenterology Nursing: The Official Journal Of The Society Of Gastroenterology Nurses And Associates</i> . 2014;37(3):236-44.                |
| SR | 164 | Williams M, Lewis L, McKeough Z, Holland A, Lee A, McNamara R, et al. Association between exercise session attendance and improvements in exercise outcomes in people with COPD. <i>Respirology</i> . 2013;18:56.                                                            |
| SR | 165 | Heck E, Jaworska N, DeSomma E, Dhooar AS, MacMaster FP, Dewey D, et al. A survey of mental health services at post-secondary institutions in Alberta. <i>Canadian Journal of Psychiatry</i> . 2014;59(5):250-8.                                                              |
| SR | 166 | Renzaho AMN, Romios P, Crock C, Sønderlund AL. The effectiveness of cultural competence programs in ethnic minority patient-centered health care-a systematic review of the literature. <i>International Journal for Quality in Health Care</i> . 2013;25(3):261-9.          |
| SR | 167 | Soong JL, Lim WH. Vasopressin and terlipressin in the treatment of vasodilatory septic shock: A systematic review. <i>Proceedings of Singapore Healthcare</i> . 2011;20(3):208-18.                                                                                           |
| SR | 168 | Sexton CE, Betts JF, Demnitz N, Dawes H, Ebmeier KP, Johansen-Berg H. A systematic review of MRI studies examining the relationship between physical fitness and activity and the white matter of the ageing brain. <i>Neuroimage</i> . 2015.                                |
| SR | 169 | Foroozan M, Beauchet A, Funck-Brentano E, Sei JF, Saiag P. Current evidence on recurrence rate of basal cell and squamous cell carcinomas treated by Mohs micrographic surgery: Systematic review. <i>Journal of the American Academy of Dermatology</i> . 2014;70(5):AB195. |
| SR | 170 | Zhang Q, Li J, Liu F, Li Z. Comments on Li H et al. "A systematic review of matrix metalloproteinase 9 as a biomarker of survival in patients with osteosarcoma". <i>Tumor Biology</i> . 2014;36(1):5-6.                                                                     |
| SR | 171 | Coghill D, Banaschewski T, Zuddas A, Pelaz A, Gagliano A, Doepfner M. Long-acting methylphenidate formulations in the treatment of attention-deficit/hyperactivity disorder: A systematic review of head-to-head studies. <i>BMC Psychiatry</i> . 2013;13.                   |
| SR | 172 | Sacchetti M, Mantelli F, Lambiasi A, Mastropasqua A, Merlo D, Bonini S. Systematic review of randomised clinical trials on topical ciclosporin a for the treatment of dry eye disease. <i>British Journal of Ophthalmology</i> . 2014;98(8):1016-22.                         |
| SR | 173 | Cramer JA, Sapin C, François C. Indirect comparison of clobazam and other therapies for Lennox-Gastaut syndrome. <i>Acta Neurologica Scandinavica</i> . 2013;128(2):91-9.                                                                                                    |
| SR | 174 | Rueda-Ochoa OL, Munoz-Suarez D, Calvo-Betancourt L, Lopez E, Vargas C, Delgado M, et al. Heart rate variability as a prognostic marker of mortality in patients with myocardial infarction systematic review and meta-analysis. <i>Europace</i> . 2012;14:iv31.              |
| SR | 175 | Hatfield G, Hammond C, Hunt MA. Clinical tests of balance in the knee osteoarthritis population: A systematic review. <i>Osteoarthritis and Cartilage</i> . 2015;23:A374.                                                                                                    |
| SR | 176 | Christopher N, Mehta N, Sinert R. Systematic review: Lung ultrasound for the diagnosis of pneumonia in the emergency department. <i>Academic Emergency Medicine</i> . 2014;21(5):S36.                                                                                        |
| SR | 177 | Nettis E, Delle Donne P, Di Leo E, Calogiuri GF, Ferrannini A, Vacca A. Rupatadine for the treatment of urticaria. <i>Expert Opinion on Pharmacotherapy</i> . 2013;14(13):1807-13.                                                                                           |
| SR | 178 | Zeiler FA, Zeiler KJ, Teitelbaum J, Gillman LM, West M. VNS for refractory status epilepticus. <i>Epilepsy Research</i> . 2015;112:100-13.                                                                                                                                   |
| SR | 179 | Sofaer N, Strech D. The need for systematic reviews of reasons. <i>Bioethics</i> . 2012;26(6):315-28.                                                                                                                                                                        |
| SR | 180 | Leclère C, Viaux S, Avril M, Achard C, Chetouani M, Missonnier S, et al. Why synchrony matters during mother-child interactions: A systematic review. <i>PLoS ONE</i> . 2014;9(12).                                                                                          |
| SR | 181 | Patel V, Patel P, Dawson J. Comment on: Non-infectious pulmonary toxicity of rituximab: A systematic review. <i>Rheumatology (United Kingdom)</i> . 2012;51(11):2111-2.                                                                                                      |
| SR | 182 | O'Sullivan KE, Hurley ET, Segurado R, Sugrue D, Hurley JP. Transaortic TAVI is a valid alternative to transapical approach. <i>Journal of Cardiac Surgery</i> . 2015;30(5):381-90.                                                                                           |
| SR | 183 | Tseng S-H, Chen H-C, Tam K-W. Systematic review and meta-analysis of the effect of equine assisted activities and therapies on gross motor outcome in children with cerebral palsy. <i>Disability And Rehabilitation</i> . 2013;35(2):89-99.                                 |
| SR | 184 | Jayakrishnan TT, Groeschl RT, George B, Thomas JP, Pappas S, Gamblin TC, et al. Management of acute cholecystitis in cancer patients: A comparative effectiveness approach. <i>Surgical Endoscopy and Other Interventional Techniques</i> . 2014;28(5):1505-14.              |
| SR | 185 | Alves GS, Oertel Knöchel V, Knöchel C, Carvalho AF, Pantel J, Engelhardt E, et al. Integrating retrogenesis theory to alzheimer's disease pathology: Insight from DTI-TBSS                                                                                                   |

|    |     |                                                                                                                                                                                                                                                                                                                                                                                                                                                                       |
|----|-----|-----------------------------------------------------------------------------------------------------------------------------------------------------------------------------------------------------------------------------------------------------------------------------------------------------------------------------------------------------------------------------------------------------------------------------------------------------------------------|
|    |     | investigation of the white matter microstructural integrity. <i>BioMed Research International</i> . 2015;2015.                                                                                                                                                                                                                                                                                                                                                        |
| SR | 186 | Huster KM, Müller A, Prohn MJ, Nowak D, Herbig B. Medical risks in older pilots: a systematic review on incapacitation and age. <i>International archives of occupational and environmental health</i> . 2014;87(6):567-78.                                                                                                                                                                                                                                           |
| SR | 187 | Alcaraz A, González-Zuelgaray J, Augustovski F. Cost-effectiveness of cardioverter defibrillators in patients with risk factors for sudden death in Argentina. <i>Value in Health</i> . 2011;14(5 SUPPL.):S33-S8.                                                                                                                                                                                                                                                     |
| SR | 188 | Lopez A, Billioud V, Peyrin-Biroulet C, Peyrin-Biroulet L. Adherence to anti-TNF therapy in inflammatory bowel diseases: A systematic review. <i>Inflammatory Bowel Diseases</i> . 2013;19(7):1528-33.                                                                                                                                                                                                                                                                |
| SR | 189 | Khan M, Wendel C, Thai H, Movahed M. Failed percutaneous recanalization of chronic total occlusion is associated with higher in-hospital mortality: A systematic review and meta-analysis of the literature. <i>Catheterization and Cardiovascular Interventions</i> . 2013;81:S33-S4.                                                                                                                                                                                |
| SR | 190 | Neville CE, McKinley MC, Holmes VA, Spence D, Woodside JV. The relationship between breastfeeding and postpartum weight change-a systematic review and critical evaluation. <i>International Journal of Obesity</i> . 2014;38(4):577-90.                                                                                                                                                                                                                              |
| SR | 191 | Hawley G, Janamian T, Jackson C, Wilkinson SA. In a maternity shared-care environment, what do we know about the paper hand-held and electronic health record: A systematic literature review. <i>BMC Pregnancy and Childbirth</i> . 2014;14(1).                                                                                                                                                                                                                      |
| SR | 192 | Raja FA, Counsell N, Colombo N, Pfisterer J, du Bois A, Parmar MK, et al. Platinum versus platinum-combination chemotherapy in platinum-sensitive recurrent ovarian cancer: A meta-analysis using individual patient data. <i>Annals of Oncology</i> . 2013;24(12):3028-34.                                                                                                                                                                                           |
| SR | 193 | Lipka S, Rabbanifard R, Kumar A, Brady P. Single versus double balloon enteroscopy for small bowel diagnostics: A systematic review and meta-analysis. <i>Journal of Clinical Gastroenterology</i> . 2015;49(3):177-84.                                                                                                                                                                                                                                               |
| SR | 194 | Wilhelm B, Rajić A, Greig JD, Waddell L, Harris J. The effect of Hazard analysis critical control point programs on microbial contamination of carcasses in abattoirs: A systematic review of published data. <i>Foodborne Pathogens and Disease</i> . 2011;8(9):949-60.                                                                                                                                                                                              |
| SR | 195 | Hurst KV, Lee R, Milosevic I, Handa A. Re: 'Efficacy and Safety of the New Oral Anticoagulants Dabigatran, Rivaroxaban, Apixaban, and Edoxaban in the Treatment and Secondary Prevention of Venous Thromboembolism: A Systematic Review and Meta-analysis of Phase III Trials'- Key Learning Points for Surgeons. <i>European Journal Of Vascular And Endovascular Surgery: The Official Journal Of The European Society For Vascular Surgery</i> . 2015;50(1):126-7. |
| SR | 196 | Antony AK, Hootnick JL, Antony AK. Ulnar forearm free flaps in head and neck reconstruction: systematic review of the literature and a case report. <i>Microsurgery</i> . 2014;34(1):68-75.                                                                                                                                                                                                                                                                           |
| SR | 197 | Pantelic M, Shenderovich Y, Cluver L, Boyes M. Predictors of internalised HIV-related stigma: a systematic review of studies in sub-Saharan Africa. <i>Health Psychology Review</i> . 2015:1-22.                                                                                                                                                                                                                                                                      |
| SR | 198 | Zhang Z, Xu J, Yao Y, Chu S, Cheng H, Chen D, et al. Giant cell tumors of the skull: A series of 18 cases and review of the literature. <i>Journal of Neuro-Oncology</i> . 2013;115(3):437-44.                                                                                                                                                                                                                                                                        |
| SR | 199 | Freedman OC, Fletcher GG, Gandhi S, Mates M, Dent SF, Trudeau ME, et al. Adjuvant endocrine therapy for early breast cancer: A systematic review of the evidence for the 2014 cancer care Ontario systemic therapy guideline. <i>Current Oncology</i> . 2015;22:S95-S113.                                                                                                                                                                                             |
| SR | 200 | Carr HJ, McDermott A, Tadbiri H, Uebbing AM, Londrigan M. The effectiveness of computer-based learning in hospitalized adults with heart failure on knowledge, re-admission, self-care, quality of life and patient satisfaction: A systematic review. <i>JBI Database of Systematic Reviews and Implementation Reports</i> . 2014;12(5):430-65.                                                                                                                      |
| SR | 201 | Frank M, Mittendorf T. Influence of pharmacogenomic profiling prior to pharmaceutical treatment in metastatic colorectal cancer on cost effectiveness: A systematic review. <i>PharmacoEconomics</i> . 2013;31(3):215-28.                                                                                                                                                                                                                                             |
| SR | 202 | Do Nascimento FV, Piccoli V, Beer MA, Von Frankenberg AD, Crispim D, Gerchman F. Association of HSD11B1 polymorphic variants and adipose tissue gene expression with metabolic syndrome, obesity and type 2 diabetes mellitus: A systematic review. <i>Diabetology and Metabolic Syndrome</i> . 2015;7(1).                                                                                                                                                            |
| SR | 203 | McKay AJ, Mahesh PA, Fordham JZ, Majeed A. Prevalence of COPD in India: A systematic review. <i>Primary Care Respiratory Journal</i> . 2012;21(3):313-21.                                                                                                                                                                                                                                                                                                             |
| SR | 204 | Córdoba-Soriano JG, Puri R, Amat-Santos I, Ribeiro HB, Abdul-Jawad Altisent O, del Trigo M, et al. Valve thrombosis following transcatheter aortic valve implantation: a systematic review. <i>Revista Española De Cardiología (English Ed)</i> . 2015;68(3):198-204.                                                                                                                                                                                                 |
| SR | 205 | Tan A, Tan DT, Tan X-W, Mehta JS. Osteo-odonto keratoprosthesis: systematic review of surgical outcomes and complication rates. <i>The Ocular Surface</i> . 2012;10(1):15-25.                                                                                                                                                                                                                                                                                         |
| SR | 206 | Sommerville EW, Chinnery PF, Gorman GS, Taylor RW. Genotypic and phenotypic heterogeneity in adult-onset progressive external ophthalmoplegia (PEO) with mitochondrial DNA instability: A systematic review. <i>Neuromuscular Disorders</i> . 2014;24:S15.                                                                                                                                                                                                            |
| SR | 207 | Lippi G, Mattiuzzi C, Franchini M. Sleep apnea and venous thromboembolism. A systematic review. <i>Thrombosis And Haemostasis</i> . 2015;114(4).                                                                                                                                                                                                                                                                                                                      |

|    |     |                                                                                                                                                                                                                                                                                                                                                                |
|----|-----|----------------------------------------------------------------------------------------------------------------------------------------------------------------------------------------------------------------------------------------------------------------------------------------------------------------------------------------------------------------|
| SR | 208 | Van Loo HM, de Jonge P, Romeijn J-W, Kessler RC, Schoevers RA. Data-driven subtypes of major depressive disorder: a systematic review. <i>BMC Medicine</i> . 2012;10:156-.                                                                                                                                                                                     |
| SR | 209 | Kriza C, Emmert M, Wahlster P, Niederländer C, Kolominsky-Rabas P. A comparison of the main cost-effectiveness drivers of virtual colonography versus conventional colonoscopy for colorectal cancer screening: An international review. <i>Annals of Oncology</i> . 2013;24:iv120.                                                                            |
| SR | 210 | De Ruijter RAG, Stegenga B, Schaub RMH, Reneman MF, Middel B. Determinants of physical and mental health complaints in dentists: a systematic review. <i>Community Dentistry And Oral Epidemiology</i> . 2015;43(1):86-96.                                                                                                                                     |
| SR | 211 | Leitmeyer K. European risk assessment guidance for infectious diseases transmitted on aircraft—the RAGIDA project. <i>Euro Surveillance: Bulletin Européen Sur Les Maladies Transmissibles = European Communicable Disease Bulletin</i> . 2011;16(16).                                                                                                         |
| SR | 212 | Fitzharris M, Yu J, Hammond N, Taylor C, Wu Y, Finfer S, et al. Injury in China: A systematic review of injury surveillance studies conducted in Chinese hospital emergency departments. <i>BMC Emergency Medicine</i> . 2011;11.                                                                                                                              |
| SR | 213 | Linhares AC, Stupka JA, Ciapponi A, Bardach AE, Glujovsky D, Aruj PK, et al. Burden and typing of rotavirus group A in Latin America and the Caribbean: Systematic review and meta-analysis. <i>Reviews in Medical Virology</i> . 2011;21(2):89-109.                                                                                                           |
| SR | 214 | Billeci L, Sicca F, Maharatna K, Apicella F, Narzisi A, Campatelli G, et al. On the application of Quantitative EEG for characterizing autistic brain: A systematic review. <i>Frontiers in Human Neuroscience</i> . 2013(JUL).                                                                                                                                |
| SR | 215 | Sendt KV, Tracy DK, Bhattacharyya S. A systematic review of factors influencing adherence to antipsychotic medication in schizophrenia-spectrum disorders. <i>Psychiatry Research</i> . 2015;225(1-2):14-30.                                                                                                                                                   |
| SR | 216 | Johnson RF, Gustin J. Acute renal failure requiring renal replacement therapy in the intensive care unit: Impact on prognostic assessment for shared decision making. <i>Journal of Palliative Medicine</i> . 2011;14(7):883-9.                                                                                                                                |
| SR | 217 | Wang H, Chen T, Wang H, Song Y, Li X, Wang J. A systematic review of the physiological and operative severity score for the enUmeration of mortality and morbidity and its Portsmouth modification as predictors of post-operative morbidity and mortality in patients undergoing pancreatic surgery. <i>American Journal of Surgery</i> . 2013;205(4):466-72. |
| SR | 218 | Bose H. Role of occupational therapy in dysphagia management for children with special needs. <i>Archives of Physical Medicine and Rehabilitation</i> . 2013;94(10):e60.                                                                                                                                                                                       |
| SR | 219 | Cervero RM, Gaines JK. The impact of CME on physician performance and patient health outcomes: an updated synthesis of systematic reviews. <i>The Journal Of Continuing Education In The Health Professions</i> . 2015;35(2):131-8.                                                                                                                            |
| SR | 220 | Marta GN, Riera R, Macedo CR, De Castro Jr G, Carvalho AL, Kowalski LP. Induction chemotherapy prior to surgery with or without postoperative radiotherapy for oral cavity cancer patients: Systematic review and meta-analysis. <i>Head and Neck</i> . 2015;37:E187.                                                                                          |
| SR | 221 | Peña L, Moreno CB, Gutierrez-Alvarez AM. Pain management in Guillain-Barre syndrome: A systematic review. <i>Neurologia (Barcelona, Spain)</i> . 2014.                                                                                                                                                                                                         |
| SR | 222 | Patil AS, Martin J, Tsukahara K, Skljarevski A, Miller K, Towns R, et al. Pseudomonoamniotic Pregnancy: Case Report and Review of Etiologic Considerations. <i>Fetal and Pediatric Pathology</i> . 2015.                                                                                                                                                       |
| SR | 223 | Visser BJ, Wieten RW, Kroon D, Nagel IM, Bélard S, van Vugt M, et al. Efficacy and safety of artemisinin combination therapy (ACT) for non-falciparum malaria: a systematic review. <i>Malaria Journal</i> . 2014;13:463-.                                                                                                                                     |
| SR | 224 | Booksmythe I, Mautz B, Davis J, Nakagawa S, Jennions MD. Facultative adjustment of the offspring sex ratio and male attractiveness: a systematic review and meta-analysis. <i>Biological Reviews Of The Cambridge Philosophical Society</i> . 2015.                                                                                                            |
| SR | 225 | Liu YF, Dong H, Chen Z, Wang Y, Tu SH. Impact of ankylosing spondylitis on sexual function: A systematic review and meta analysis. <i>Experimental and Therapeutic Medicine</i> . 2015;9(4):1501-7.                                                                                                                                                            |
| SR | 226 | Rathbone J, Kaltenthaler E, Richards A, Tappenden P, Bessey A, Cantrell A. A systematic review of eculizumab for atypical haemolytic uraemic syndrome (aHUS). <i>BMJ Open</i> . 2013;3(11).                                                                                                                                                                    |
| SR | 227 | Konno R, Kang HS, Makimoto K. The best evidence for minimizing resistance-to-care during assisted personal care for older adults with dementia in nursing homes: A systematic review. <i>JBHI Database of Systematic Reviews and Implementation Reports</i> . 2012;10(58):4622-32.                                                                             |
| SR | 228 | Lee MR, Unger JG, Rohrich RJ. Management of the nasal dorsum in rhinoplasty: a systematic review of the literature regarding technique, outcomes, and complications. <i>Plastic and reconstructive surgery</i> . 2011;128(5):538e-50e.                                                                                                                         |
| SR | 229 | Broeders JAJL, Roks DJGH, Ahmed Ali U, Draaisma WA, Smout AJPM, Hazebroek EJ. Laparoscopic anterior versus posterior fundoplication for gastroesophageal reflux disease: Systematic review and meta-analysis of randomised trials. <i>Surgical Endoscopy and Other Interventional Techniques</i> . 2012;26:S2.                                                 |
| SR | 230 | Jia Y, Chen C, Ng CS, Leung SW. Meta-analysis of randomized controlled trials on the efficacy of Di'ao Xinxuekang capsule and isosorbide dinitrate in treating angina pectoris. <i>Evidence-based Complementary and Alternative Medicine</i> . 2012;2012.                                                                                                      |
| SR | 231 | Chiappini E, Accetta G, Bonsignori F, Boddp V, Galli L, Biggeri A, et al. Interferon-γ release assays for the diagnosis of mycobacterium tuberculosis infection in children: A systematic review and meta-analysis. <i>International Journal of Immunopathology and Pharmacology</i> . 2012;25(3):557-64.                                                      |



|    |     |                                                                                                                                                                                                                                                                                                         |
|----|-----|---------------------------------------------------------------------------------------------------------------------------------------------------------------------------------------------------------------------------------------------------------------------------------------------------------|
| SR | 232 | Elnahas A, Graybiel K, Farrokhhyar F, Gmora S, Anvari M, Hong D. Revisional surgery after failed laparoscopic adjustable gastric banding: A systematic review. <i>Surgical Endoscopy and Other Interventional Techniques</i> . 2013;27(3):740-5.                                                        |
| SR | 233 | Noyes AM, Thompson PD. A systematic review of the time course of atherosclerotic plaque regression. <i>Atherosclerosis</i> . 2014;234(1):75-84.                                                                                                                                                         |
| SR | 234 | Al-Moraissi EA, El-Sharkawy TM, El-Ghareeb TI, Chrcanovic BR. Three-dimensional versus standard miniplate fixation in the management of mandibular angle fractures: A systematic review and meta-analysis. <i>International Journal of Oral and Maxillofacial Surgery</i> . 2014;43(6):708-16.          |
| SR | 235 | Domínguez VB, Ramos N, García D, Bustamante M, Torrents A, Varea S, et al. Clinical trials during pregnancy: What has been done. A systematic review. <i>Basic and Clinical Pharmacology and Toxicology</i> . 2011;109:71.                                                                              |
| SR | 236 | Punukollu M, Mushet N, Linney M, Hennessy C, Morton M. Neuropsychiatric manifestations of Sydenham's chorea: A systematic review. <i>Developmental Medicine and Child Neurology</i> . 2015.                                                                                                             |
| SR | 237 | Dourdin N, Wagner M, Melnyk P, Rindress D. Systematic review to assess the quality of published health economic evaluations. <i>Journal of Population Therapeutics and Clinical Pharmacology</i> . 2011;18(2):e210.                                                                                     |
| SR | 238 | Hills C, Boshoff K, Jewell K. Preferred teaching and learning approaches of students considered 'Generation Y' in health professions pre registration education: A comprehensive systematic review protocol. <i>JB I Database of Systematic Reviews and Implementation Reports</i> . 2013;11(5):140-56. |
| SR | 239 | Klonoff EA. Introduction to the special section on discrimination. <i>Health Psychology: Official Journal Of The Division Of Health Psychology, American Psychological Association</i> . 2014;33(1):1-2.                                                                                                |
| SR | 240 | Al Shemeili S, Klein S, Strath A, Stewart D. Identifying inappropriate anticholinergic prescribing in the elderly: A systematic review. <i>International Journal of Clinical Pharmacy</i> . 2013;35(6):1343.                                                                                            |
| SR | 241 | Oliveira MAd, Ribeiro H, Castillo-Salgado C. Geospatial analysis applied to epidemiological studies of dengue: a systematic review. <i>Revista Brasileira De Epidemiologia = Brazilian Journal Of Epidemiology</i> . 2013;16(4):907-17.                                                                 |
| SR | 242 | Miller AC, Elamin EM, Suffredini AF. Inhaled anticoagulation regimens for the treatment of smoke inhalation-associated acute lung injury: A systematic review. <i>Critical Care Medicine</i> . 2014;42(2):413-9.                                                                                        |
| SR | 243 | Belvederi Murri M, Pariante CM, Dazzan P, Hepgul N, Papadopoulos AS, Zunszain P, et al. Hypothalamic-pituitary-adrenal axis and clinical symptoms in first-episode psychosis. <i>Psychoneuroendocrinology</i> . 2012;37(5):629-44.                                                                      |
| SR | 244 | Zeni MB. Systematic review of health literacy in Cochrane database studies on paediatric asthma educational interventions: Searching beyond rigorous design. <i>International Journal of Evidence-Based Healthcare</i> . 2012;10(1):3-8.                                                                |
| SR | 245 | Fleuren MAH, Paulussen TGWM, Van Dommelen P, Van Buuren S. Towards a measurement instrument for determinants of innovations. <i>International Journal For Quality In Health Care: Journal Of The International Society For Quality In Health Care / Isqua</i> . 2014;26(5):501-10.                      |
| SR | 246 | Yampolsky C, Hem S, Bendersky D. Dorsal column stimulator applications. <i>Surgical Neurology International</i> . 2012;3(SUPPL4):S275-S89.                                                                                                                                                              |
| SR | 247 | Polisena J, Chen S, Cimon K, McGill S, Forward K, Gardam M. Clinical effectiveness of rapid tests for methicillin resistant <i>Staphylococcus aureus</i> (MRSA) in hospitalized patients: A systematic review. <i>BMC Infectious Diseases</i> . 2011:336.                                               |
| SR | 248 | Hu Z, Yin X, Liao J, Zhou C, Yang Z, Zou S. The effect of teeth extraction for orthodontic treatment on the upper airway: a systematic review. <i>Sleep and Breathing</i> . 2015.                                                                                                                       |
| SR | 249 | Cleyen I, Vazeille E, Artieda M, Verspaget HW, Szczypiorska M, Bringer M-A, et al. Genetic and microbial factors modulating the ubiquitin proteasome system in inflammatory bowel disease. <i>Gut</i> . 2014;63(8):1265-74.                                                                             |
| SR | 250 | Gupta A, Chazen JL, Hartman M, Delgado D, Anumula N, Shao H, et al. Cerebrovascular reserve and stroke risk in patients with carotid stenosis or occlusion: A systematic review and meta-analysis. <i>Stroke</i> . 2012;43(11):2884-91.                                                                 |
| SR | 251 | Armstrong R, White S, Streak J, Tivey D. The effect of nasal introduction of anaesthetic in adults undergoing fiberoptic endoscopic evaluation of swallowing (FEES): A systematic review protocol. <i>JB I Database of Systematic Reviews and Implementation Reports</i> . 2013;11(6):259-74.           |
| SR | 252 | Gao Q, Tsoi KKF, Hirai HW, Wong MCS, Chan FKL, Wu JCY, et al. Serrated polyps and the risk of synchronous colorectal advanced neoplasia: A systematic review and meta-analysis. <i>American Journal of Gastroenterology</i> . 2015;110(4):501-9.                                                        |
| SR | 253 | Sproat R, Radford P, Hunt A. Hemostatic glues in tonsillectomy: A systematic review. <i>Laryngoscope</i> . 2015.                                                                                                                                                                                        |
| SR | 254 | Bourke L, Rosario DJ, Steed L, Taylor SJ. Response to comment on 'Interventions to improve exercise behaviour in sedentary people living with and beyond cancer: A systematic review'. <i>British Journal of Cancer</i> . 2014;111(12):2378-9.                                                          |
| SR | 255 | Rodrigo GJ, Plaza V. Efficacy and safety of a fixed-dose combination of indacaterol and glycopyrronium for the treatment of COPD: A systematic review. <i>Chest</i> . 2014;146(2):309-17.                                                                                                               |
| SR | 256 | Mooney J, Ranasinghe I, Chow C, Barzi F, Zoungas S, Tan T, et al. Pre-operative kidney function as a predictor of adverse outcomes after surgery- A systematic review and meta-analysis. <i>Heart Lung and Circulation</i> . 2011;20:S212.                                                              |

|    |     |                                                                                                                                                                                                                                                                                                                 |
|----|-----|-----------------------------------------------------------------------------------------------------------------------------------------------------------------------------------------------------------------------------------------------------------------------------------------------------------------|
| SR | 257 | Ben Hadj Yahia M-B, Jouin-Bortolotti A, Dervaux B. Extending the Human Papillomavirus Vaccination Programme to Include Males in High-Income Countries: A Systematic Review of the Cost-Effectiveness Studies. <i>Clinical Drug Investigation</i> . 2015;35(8):471-85.                                           |
| SR | 258 | Singh AD, Turell ME, Topham AK. Uveal melanoma: Trends in incidence, treatment, and survival. <i>Ophthalmology</i> . 2011;118(9):1881-5.                                                                                                                                                                        |
| SR | 259 | Gornall BF, Myles PS, Smith CL, Burke JA, Leslie K, Pereira MJ, et al. Measurement of quality of recovery using the QoR-40: A quantitative systematic review. <i>British Journal of Anaesthesia</i> . 2013;111(2):161-9.                                                                                        |
| SR | 260 | Luijten M, Machielsen MWJ, Veltman DJ, Hester R, de Haan L, Franken IHA. Systematic review of ERP and fMRI studies investigating inhibitory control and error processing in people with substance dependence and behavioural addictions. <i>Journal of Psychiatry and Neuroscience</i> . 2014;39(3):149-69.     |
| SR | 261 | Wu CC, Bai CH, Huang MT, Wu CH, Tam KW. Local anesthetic infusion pump for pain management following open inguinal hernia repair: A meta-analysis. <i>International Journal of Surgery</i> . 2014;12(3):245-50.                                                                                                 |
| SR | 262 | Tsukamoto K, Machida K. Effects of psychological stress on neutrophil phagocytosis and bactericidal activity in humans a meta-analysis. <i>International Journal of Psychophysiology</i> . 2014;91(2):67-72.                                                                                                    |
| SR | 263 | Clark K, Currow DC. Assessing constipation in palliative care within a gastroenterology framework. <i>Palliative Medicine</i> . 2012;26(6):834-41.                                                                                                                                                              |
| SR | 264 | Boers M. Using literature to solve clinical problems. <i>Annals of the Rheumatic Diseases</i> . 2013;72.                                                                                                                                                                                                        |
| SR | 265 | De-Almeida CP, Wenzel A, de-Carvalho CS, Powell VB, Araújo-Neto C, Quarantini LC, et al. Amygdalar volume in borderline personality disorder with and without comorbid post-traumatic stress disorder: A meta-analysis. <i>CNS Spectrums</i> . 2012;17(2):70-5.                                                 |
| SR | 266 | Boerner KE, Birnie KA, Chambers CT, Taddio A, McMurtry CM, Noel M, et al. Simple Psychological Interventions for Reducing Pain From Common Needle Procedures in Adults: Systematic Review of Randomized and Quasi-Randomized Controlled Trials. <i>The Clinical Journal Of Pain</i> . 2015;31(10 Suppl):S90-S8. |
| SR | 267 | Jeon KC, Chen LS, Goodson P. Decision to abort after a prenatal diagnosis of sex chromosome abnormality: A systematic review of the literature. <i>Genetics in Medicine</i> . 2011.                                                                                                                             |
| SR | 268 | Muth A, Ragnarsson O, Johannsson G, Wängberg B. Systematic review of surgery and outcomes in patients with primary aldosteronism. <i>The British journal of surgery</i> . 2015;102(4):307-17.                                                                                                                   |
| SR | 269 | Pan X-F, Griffiths UK, Pennington M, Yu H, Jit M. Systematic review of economic evaluations of vaccination programs in mainland China: Are they sufficient to inform decision making? <i>Vaccine</i> . 2015.                                                                                                    |
| SR | 270 | Zeng X, Dong P, Xie X. Disease burden of rheumatoid arthritis in mainland China: A systematic review and meta-analysis. <i>Value in Health</i> . 2012;15(7):A672.                                                                                                                                               |
| SR | 271 | Sharma V, Deo SV, Altarabsheh SE, Cho YH, Erwin PJ, Park SJ. Comparison of the early haemodynamics of stented pericardial and porcine aortic valves. <i>European Journal Of Cardio-Thoracic Surgery: Official Journal Of The European Association For Cardio-Thoracic Surgery</i> . 2015;47(1):4-10.            |
| SR | 272 | Liu Y, Lv DL, Duan JJ, Xu SL, Zhang JF, Yang XJ, et al. ALDH1A1 expression correlates with clinicopathologic features and poor prognosis of breast cancer patients: A systematic review and meta-analysis. <i>BMC Cancer</i> . 2014;14(1).                                                                      |
| SR | 273 | Capolongo S, Buffoli M, Oppio A, Petronio MG. [Sustainability and hygiene of building: future perspectives]. <i>Epidemiologia E Prevenzione</i> . 2014;38(6 Suppl 2):46-50.                                                                                                                                     |
| SR | 274 | Ahsan SF, Wang Y. In response to "systematic review and meta-analysis of Meniett therapy for Meniere's disease". <i>Laryngoscope</i> . 2015.                                                                                                                                                                    |
| SR | 275 | Moraes LC, Só MVR, Dal Pizzol TdS, Ferreira MBC, Montagner F. Distribution of genes related to antimicrobial resistance in different oral environments: a systematic review. <i>Journal Of Endodontics</i> . 2015;41(4):434-41.                                                                                 |
| SR | 276 | McMahon JM, Volpe EM, Klostermann K, Trabold N, Xue Y. A systematic review of the psychometric properties of the Sexual Relationship Power Scale in HIV/AIDS research. <i>Archives Of Sexual Behavior</i> . 2015;44(2):267-94.                                                                                  |
| SR | 277 | Bennabi D, Aouizerate B, El-Hage W, Doumy O, Moliere F, Courtet P, et al. Risk factors for treatment resistance in unipolar depression: a systematic review. <i>Journal Of Affective Disorders</i> . 2015;171:137-41.                                                                                           |
| SR | 278 | Joshi A, Trout K. The role of health information kiosks in diverse settings: a systematic review. <i>Health Information And Libraries Journal</i> . 2014;31(4):254-73.                                                                                                                                          |
| SR | 279 | i JY, Zhang YF, Smith GS, Xue CJ, Luo YN, Chen WH, et al. Quality of reporting of randomized clinical trials in tai chi interventions-A systematic review. <i>Evidence-based Complementary and Alternative Medicine</i> . 2011;2011.                                                                            |
| SR | 280 | Wood TJ, Quinn KM, Farrokhyar F, Deheshi B, Corbett T, Ghert MA. Local control of extra-abdominal desmoid tumors: Systematic review and meta-analysis. <i>Rare Tumors</i> . 2013;5(1):5-10.                                                                                                                     |
| SR | 281 | Mounesan L, Sepidarkish M, Hosseini H, Ahmadi A, Ardalan G, Kelishadi R, et al. Policy brief on promoting physical activity among adolescents. <i>International Journal of Preventive Medicine</i> . 2012;3(9):599-606.                                                                                         |
| SR | 282 | Dulon M, Peters C, Schablon A, Nienhaus A. MRSA carriage among healthcare workers in non-outbreak settings in Europe and the United States: A systematic review. <i>BMC Infectious Diseases</i> . 2014;14(1).                                                                                                   |

|    |     |                                                                                                                                                                                                                                                                                                                                                                   |
|----|-----|-------------------------------------------------------------------------------------------------------------------------------------------------------------------------------------------------------------------------------------------------------------------------------------------------------------------------------------------------------------------|
| SR | 283 | Xie ZB, Ma L, Wang XB, Bai T, Ye JZ, Zhong JH, et al. Transarterial embolization with or without chemotherapy for advanced hepatocellular carcinoma: a systematic review. <i>Tumor Biology</i> . 2014;35(9):8451-9.                                                                                                                                               |
| SR | 284 | Zhou H-X, Lu L, Chu T, Wang T, Cao D, Li F, et al. Skeletal cryptococcosis from 1977 to 2013. <i>Frontiers In Microbiology</i> . 2015;5:740-.                                                                                                                                                                                                                     |
| SR | 285 | Creemers H, Grupstra H, Nollet F, van den Berg LH, Beelen A. Prognostic factors for the course of functional status of patients with ALS: a systematic review. <i>Journal of Neurology</i> . 2015;262(6):1407-23.                                                                                                                                                 |
| SR | 286 | Malchow B, Hasan A, Fusar-Poli P, Schmitt A, Falkai P, Wobrock T. Cannabis abuse and brain morphology in schizophrenia: A review of the available evidence. <i>European Archives of Psychiatry and Clinical Neuroscience</i> . 2013;263(1):3-13.                                                                                                                  |
| SR | 287 | Rahimtoola SH, Huang G. Treatment of obstructive thrombosed prosthetic heart valve. <i>Cardiology (Switzerland)</i> . 2015;131:98.                                                                                                                                                                                                                                |
| SR | 288 | Wolz I, Fagundo AB, Treasure J, Fernández-Aranda F. The processing of food stimuli in abnormal eating: A systematic review of electrophysiology. <i>European Eating Disorders Review</i> . 2015;23(4):251-61.                                                                                                                                                     |
| SR | 289 | Schinasi L, Leon ME. Non-hodgkin lymphoma and occupational exposure to agricultural pesticide chemical groups and active ingredients: A systematic review and meta-analysis. <i>International Journal of Environmental Research and Public Health</i> . 2014;11(4):4449-527.                                                                                      |
| SR | 290 | Baker L, Beres AL, Baird R. A systematic review and meta-analysis of gastrostomy insertion techniques in children. <i>Journal of Pediatric Surgery</i> . 2015;50(5):718-25.                                                                                                                                                                                       |
| SR | 291 | Abdallah FW, Halpern SH, Aoyama K, Brull R. Will the real benefits of single-shot interscalene block please stand up? A systematic review and meta-analysis. <i>Anesthesia and Analgesia</i> . 2015;120(5):1114-29.                                                                                                                                               |
| SR | 292 | Bryden A, Roberts B, Petticrew M, McKee M. A systematic review of the influence of community level social factors on alcohol use. <i>Health and Place</i> . 2013;21:70-85.                                                                                                                                                                                        |
| SR | 293 | Zwiers R, Wiegerinck JI, Murawski CD, Smyth NA, Kennedy JG, Van Dijk CN. Surgical treatment for posterior ankle impingement. <i>Arthroscopy - Journal of Arthroscopic and Related Surgery</i> . 2013;29(7):1263-70.                                                                                                                                               |
| SR | 294 | Van Der Meer FJ, Velthorst E, Meijer CJ, Machielsen MW, Fusar-Poli P, De Haan L. Cannabis use in patients at clinical high risk of psychosis: Impact on prodromal symptoms and transition to psychosis-a systematic review. <i>Schizophrenia Research</i> . 2012;136:S347.                                                                                        |
| SR | 295 | Zhang R, Xu Y, Yang S, Liang H, Zhang Y, Liu Y. OnabotulinumtoxinA for neurogenic detrusor overactivity and dose differences: a systematic review. <i>International braz j urol : official journal of the Brazilian Society of Urology</i> . 2015;41(2):207-19.                                                                                                   |
| RR | 296 | Kiezebrink K, Coyle J, Hoddinott P, Witham M, Clarke A, Avenell A. Ways to intervene and support engagement of older adults weight loss study (wise owls) c mixed methods project developing an intervention. <i>Annals of Nutrition and Metabolism</i> . 2013;63:721-2.                                                                                          |
| RR | 297 | Chaiyachati KH, Ogbuoji O, Price M, Suthar AB, Negussie EK, Bärnighausen T. Interventions to improve adherence to antiretroviral therapy: a rapid systematic review. <i>AIDS (London, England)</i> . 2014;28 Suppl 2:S187-S204.                                                                                                                                   |
| RR | 298 | Franek J. Challenges of developing rapid guidance for complex interventions. <i>BMJ Quality and Safety</i> . 2013;22:A33.                                                                                                                                                                                                                                         |
| RR | 299 | Dennis SM, Harris M, Lloyd J, Powell Davies G, Faruqi N, Zwar N. Do people with existing chronic conditions benefit from telephone coaching? A rapid review. <i>Australian Health Review: A Publication Of The Australian Hospital Association</i> . 2013;37(3):381-8.                                                                                            |
| RR | 300 | Hildon Z, Neuburger J, Allwood D, van der Meulen J, Black N. Clinicians' and patients' views of metrics of change derived from patient reported outcome measures (PROMs) for comparing providers' performance of surgery. <i>BMC health services research</i> . 2012;12:171.                                                                                      |
| RR | 301 | Elliott IA, Beech AR. A U.K. Cost-Benefit Analysis of Circles of Support and Accountability Interventions. <i>Sexual Abuse: Journal of Research and Treatment</i> . 2013;25(3):211-29.                                                                                                                                                                            |
| RR | 302 | Jarrett N, Scott I, Addington-Hall J, Amir Z, Brearley S, Hodges L, et al. Informing future research priorities into the psychological and social problems faced by cancer survivors: a rapid review and synthesis of the literature. <i>European Journal Of Oncology Nursing: The Official Journal Of European Oncology Nursing Society</i> . 2013;17(5):510-20. |
| RR | 303 | Varker T, Forbes D, Dell L, Weston A, Merlin T, Hodson S, et al. Rapid evidence assessment: increasing the transparency of an emerging methodology. <i>Journal Of Evaluation In Clinical Practice</i> . 2015.                                                                                                                                                     |
| RR | 304 | Khangura S, Konnyu K, Cushman R, Grimshaw J, Moher D. Evidence summaries: The evolution of a rapid review approach. <i>Systematic Reviews</i> . 2012;1(1).                                                                                                                                                                                                        |
| RR | 305 | Jain S, Boyd C, Fiorentino L, Khorsan R, Crawford C. Are there efficacious treatments for treating the fatigue-sleep disturbance-depression symptom cluster in breast cancer patients? A Rapid Evidence Assessment of the Literature (REAL©). <i>Breast Cancer: Targets and Therapy</i> . 2015;7:267-91.                                                          |
| RR | 306 | Feys F, Devroey D. Dapoxetine for premature ejaculation: A rapid evidence assessment. <i>Journal of Sexual Medicine</i> . 2015;12:24.                                                                                                                                                                                                                             |
| RR | 307 | Sutton A, Grant MJ. Cost-effective ways of delivering enquiry services: a rapid review. <i>Health Information And Libraries Journal</i> . 2011;28(4):249-55.                                                                                                                                                                                                      |
| RR | 308 | Jain S, Fiorentino L, Lee C, Crawford C, Khorsan R, Jonas W. A rapid evidence assessment (real©) of the literature: Are there efficacious treatments for treating the                                                                                                                                                                                             |

|    |     |                                                                                                                                                                                                                                                                                                                                                       |
|----|-----|-------------------------------------------------------------------------------------------------------------------------------------------------------------------------------------------------------------------------------------------------------------------------------------------------------------------------------------------------------|
|    |     | fatigue-sleep disturbance-depression symptom cluster in breast cancer patients? <i>Psycho-Oncology</i> . 2013;22:75-6.                                                                                                                                                                                                                                |
| RR | 309 | Manayi A, Saeidnia S. A concern on phthalate pollution of herbal extracts/medicines and detection methods. <i>Research Journal of Pharmacognosy</i> . 2014;2(3):49-54.                                                                                                                                                                                |
| RR | 310 | Boycott N, Schneider J, McMurran M. Additional interventions to enhance the effectiveness of individual placement and support: a rapid evidence assessment. <i>Rehabilitation Research And Practice</i> . 2012;2012:382420-.                                                                                                                          |
| RR | 311 | Tavares SBN, Alves de Sousa NL, Manrique EJC, Pinheiro de Albuquerque ZB, Zeferino LC, Amaral RG. Improvement in the routine screening of cervical smears: A study using rapid prescreening and 100% rapid review as internal quality control methods. <i>Cancer Cytopathology</i> . 2011;119(6):367-76.                                              |
| RR | 312 | Khorsan R, Crawford C, Ives JA, Walter AR, Jonas WB. The effect of omega-3 fatty acids on biomarkers of inflammation: a rapid evidence assessment of the literature. <i>Military Medicine</i> . 2014;179(11 Suppl):2-60.                                                                                                                              |
| RR | 313 | Thomas B, Potter J, Sacks G, Webster J. Evaluation of national food reformulation initiatives: A proposed evaluation tool. <i>Global Heart</i> . 2014;9(1):e309.                                                                                                                                                                                      |
| RR | 314 | Lee C, Crawford C, Wallerstedt D, York A, Duncan A, Smith J, et al. The effectiveness of acupuncture research across components of the trauma spectrum response (tsr): A systematic review of reviews. <i>Systematic Reviews</i> . 2012;1(1).                                                                                                         |
| RR | 315 | McDaid D, Park A. Investing in integrative medicine for mental health and wellbeing: Making the economic case. <i>BMC Complementary and Alternative Medicine</i> . 2012;12.                                                                                                                                                                           |
| RR | 316 | Kim S, Wang B, Lee J, Kim B, La H, Park YM, et al. Statistical analysis system of spontaneous adverse drug reaction reports. <i>Journal of Korean Society for Clinical Pharmacology and Therapeutics</i> . 2012;20(2):155-64.                                                                                                                         |
| RR | 317 | Shin JJ, Rosenfeld RM, Schwartz SR, Mitchell RB, Weinberger DG. Rapid review: The guidelines in pediatric otolaryngology. <i>Otolaryngology - Head and Neck Surgery (United States)</i> . 2012;147:P30.                                                                                                                                               |
| RR | 318 | van den Broek EMJM, van der Zaag-Loonen HJ, Bruinjes TD. Systematic Review: Efficacy of Gufoni Maneuver for Treatment of Lateral Canal Benign Paroxysmal Positional Vertigo with Geotropic Nystagmus. <i>Otolaryngology--Head And Neck Surgery: Official Journal Of American Academy Of Otolaryngology-Head And Neck Surgery</i> . 2014;150(6):933-8. |
| RR | 319 | Reynolds P. Gap analysis of animal hemorrhagic shock models through rapid evidence assessment strategies. <i>Shock</i> . 2015;43(6):42.                                                                                                                                                                                                               |
| RR | 320 | Macaulay R. What the english could learn from the Irish: Making the nice approval process more cost-effective. <i>Value in Health</i> . 2014;17(7):A440.                                                                                                                                                                                              |
| RR | 321 | Sadler M, Murphy M. Do standardized referral forms improve the quality of general practitioner referral letters to pigmented lesion clinics? A pilot study. <i>British Journal of Dermatology</i> . 2012;167(6):e29.                                                                                                                                  |
| RR | 322 | Lui M, Jones CA, Westby MD. Effect of non-surgical, non-pharmacological weight loss interventions in patients who are obese prior to hip and knee arthroplasty surgery: a rapid review. <i>Systematic Reviews</i> . 2015;4:121-.                                                                                                                      |
| RR | 323 | Wiffen PJ, Derry S, Moore RA. Impact of morphine, fentanyl, oxycodone or codeine on patient consciousness, appetite and thirst when used to treat cancer pain. <i>The Cochrane Database Of Systematic Reviews</i> . 2014;5:CD011056.                                                                                                                  |
| RR | 324 | Moran R, Davidson P. An uneven spread: a review of public involvement in the National Institute of Health Research's Health Technology Assessment program. <i>International Journal Of Technology Assessment In Health Care</i> . 2011;27(4):343-7.                                                                                                   |
| RR | 325 | Ryu S, James J, Gerszten P, Yin F, Timmerman R, Hitchcock Y, et al. RTOG 0631 Phase II/III study of image-guided stereotactic radiosurgery for localized spine metastases: Phase II results. <i>International Journal of Radiation Oncology Biology Physics</i> . 2011;81(2):S131-S2.                                                                 |
| RR | 326 | Marks L, Weatherly H, Mason A. Prioritizing investment in public health and health equity: what can commissioners do? <i>Public Health</i> . 2013;127(5):410-8.                                                                                                                                                                                       |
| RR | 327 | Koster M, Garrity C, Gallagher C, Schunemann H, Norris S. The role of rapid systematic reviews for development of rapid guidance in health care and health policy settings. <i>BMJ Quality and Safety</i> . 2013;22:A6.                                                                                                                               |
| RR | 328 | Halladay CW, Trikalinos TA, Schmid IT, Schmid CH, Dahabreh IJ. Using data sources beyond PubMed has a modest impact on the results of systematic reviews of therapeutic interventions. <i>Journal of Clinical Epidemiology</i> . 2015;68(9):1076-84.                                                                                                  |
| RR | 329 | Klee EW, Winter E, Ferber MJ. Bioinformatics decision support for interpretation of clinical NGS variants. <i>Journal of Molecular Diagnostics</i> . 2013;15(6):940-1.                                                                                                                                                                                |
| RR | 330 | Kirkland SW, Bullard M, Couperthwaite S, Rowe BH. Establishing a standardized process of gathering evidence-based information to support clinical knowledge development. <i>Canadian Journal of Emergency Medicine</i> . 2014;16:S95.                                                                                                                 |
| RR | 331 | Ryu S, Pugh SL, Gerszten PC, Yin F-F, Timmerman RD, Hitchcock YJ, et al. RTOG 0631 phase 2/3 study of image guided stereotactic radiosurgery for localized (1-3) spine metastases: phase 2 results. <i>Practical Radiation Oncology</i> . 2014;4(2):76-81.                                                                                            |
| RR | 332 | Yang ZX, Shen JT, Li YP, Zhao K, Shi CH, Xiao Y, et al. Helical tomotherapy for cancer treatment: a rapid health technology assessment. <i>Journal Of Evidence-Based Medicine</i> . 2014;7(3):192-218.                                                                                                                                                |
| RR | 333 | de Bruin RJM, Hage R, van der Zaag-Loonen H, van Benthem PPG. Rapid review: sinonasal surgery vs. medical therapy for asthma in patients with chronic rhinosinusitis with or without nasal polyps. <i>European Archives Of Oto-Rhino-Laryngology: Official Journal Of The European Federation Of Oto-Rhino-Laryngological Societies (EUFOS)</i> :     |



|    |     |                                                                                                                                                                                                                                                                                                                                           |
|----|-----|-------------------------------------------------------------------------------------------------------------------------------------------------------------------------------------------------------------------------------------------------------------------------------------------------------------------------------------------|
|    |     | Affiliated With The German Society For Oto-Rhino-Laryngology - Head And Neck Surgery. 2015.                                                                                                                                                                                                                                               |
| RR | 334 | Neville-Webbe HL, Carser JE, Wong H, Andrews J, Poulter T, Smith R, et al. The impact of a new acute oncology service in acute hospitals: Experience from the Clatterbridge Cancer Centre and Merseyside and Cheshire Cancer Network. <i>Clinical Medicine, Journal of the Royal College of Physicians of London.</i> 2013;13(6):565-659. |
| RR | 335 | Lombardi G, Zustovich F, Farina P, Polo V, Farina M, Puppa AD, et al. Cilengitide in bevacizumab-refractory high-grade glioma: two case reports and critical review of the literature. <i>Anti-Cancer Drugs.</i> 2012;23(7):749-53.                                                                                                       |
| RR | 336 | Petrosino A, Campie P, Pace J, Fronius T, Guckenburg S, Wiatrowski M, et al. Cross-sector, multi-agency interventions to address urban youth firearms violence: A Rapid Evidence Assessment. <i>Aggression and Violent Behavior.</i> 2015;22:87-96.                                                                                       |
| RR | 337 | Freitas MG, Souza KM, Silva MT, Elias FTS. Bariatric surgery from the perspective of brazilian national health system (sus). <i>Value in Health.</i> 2012;15(7):A402-A3.                                                                                                                                                                  |
| RR | 338 | Coleman P, Turner J. Patient priorities and decision-making about using 999 EMS? A review of the literature. <i>Emergency Medicine Journal.</i> 2011;28(11):e2.                                                                                                                                                                           |
| RR | 339 | Davidson G, Kelly B, Macdonald G, Rizzo M, Lombard L, Abogunrin O, et al. Supported decision making: a review of the international literature. <i>International Journal Of Law And Psychiatry.</i> 2015;38:61-7.                                                                                                                          |
| RR | 340 | Hartling L, Guise J-M, Kato E, Anderson J, Aronson N, Belinson S, et al. EPC Methods: An Exploration of Methods and Context for the Production of Rapid Reviews. 2015.                                                                                                                                                                    |
| RR | 341 | Talaulikar VS, Arulkumaran S. Medico-legal issues with CTG interpretation. <i>Current Women's Health Reviews.</i> 2013;9(3):145-57.                                                                                                                                                                                                       |
| RR | 342 | Yadav R, Shah AK, Loeb JA, Swamy MNS, Agarwal R. Morphology-based automatic seizure detector for intracerebral EEG recordings. <i>IEEE Transactions on Biomedical Engineering.</i> 2012;59(7):1871-81.                                                                                                                                    |
| RR | 343 | Crawford C, Lee C, Freilich D, Buckenmaier CC, Crawford P, Delgado R, et al. Effectiveness of active self-care complementary and integrative medicine therapies: Options for the management of chronic pain symptoms. <i>Pain Medicine (United States).</i> 2014;15(S1):S86-S95.                                                          |
| RR | 344 | Toomey E, Currie-Murphy L, Matthews J, Hurley DA. Implementation fidelity of physiotherapist-delivered group education and exercise interventions to promote self-management in people with osteoarthritis and chronic low back pain: a rapid review part II. <i>Manual Therapy.</i> 2015;20(2):287-94.                                   |
| RR | 345 | Treanor CJ, Donnelly M. The late effects of cancer and cancer treatment: a rapid review. <i>The Journal Of Community And Supportive Oncology.</i> 2014;12(4):137-48.                                                                                                                                                                      |
| RR | 346 | Miani C, Ball S, Pitchforth E, Exley J, King S, Roland M, et al. Organisational interventions to reduce length of stay in hospital: a rapid evidence assessment. 2014.                                                                                                                                                                    |
| RR | 347 | Kilpatrick C, Murdoch H, Paterson A. The rapid delivery of national evidence based recommendations for HAI care bundles. <i>Antimicrobial Resistance and Infection Control.</i> 2013;2.                                                                                                                                                   |
| RR | 348 | Attipoe S, Zeno SA, Lee C, Crawford C, Khorsan R, Walter AR, et al. Tyrosine for Mitigating Stress and Enhancing Performance in Healthy Adult Humans, a Rapid Evidence Assessment of the Literature. <i>Military Medicine.</i> 2015;180(7):754-65.                                                                                        |
| RR | 349 | Lee C, Crawford C, Buckenmaier C, Schoomaker E, Delgado R, York A. Active, self-care complementary and integrative medicine therapies for the management of chronic pain symptoms: A rapid evidence assessment of the literature. <i>Journal of Alternative and Complementary Medicine.</i> 2014;20(5):A137-A8.                           |
| RR | 350 | Nancarrow SA, Roots A, Grace S, Saberi V. Models of care involving district hospitals: a rapid review to inform the Australian rural and remote context. <i>Australian Health Review: A Publication Of The Australian Hospital Association.</i> 2015.                                                                                     |
| RR | 351 | Bungay H, Vella-Burrows T. The effects of participating in creative activities on the health and well-being of children and young people: a rapid review of the literature. <i>Perspectives In Public Health.</i> 2013;133(1):44-52.                                                                                                      |
| RR | 352 | Polisena J, Garritty C, Kamel C, Stevens A, Abou-Setta AM. Rapid review programs to support health care and policy decision making: a descriptive analysis of processes and methods. <i>Systematic Reviews.</i> 2015;4:26-.                                                                                                               |
| RR | 353 | Fitzpatrick-Lewis D, Ganann R, Krishnaratne S, Ciliska D, Kouyoumdjian F, Hwang SW. Effectiveness of interventions to improve the health and housing status of homeless people: a rapid systematic review. <i>BMC public health.</i> 2011;11:638.                                                                                         |
| RR | 354 | Belshaw Z, Asher L, Harvey ND, Dean RS. Quality of life assessment in domestic dogs: An evidence-based rapid review. <i>Veterinary Journal.</i> 2015.                                                                                                                                                                                     |
| RR | 355 | Tricco AC, Zarin W, Antony J, Hutton B, Moher D, Sherfali D, et al. An international survey and modified Delphi approach revealed numerous rapid review methods. <i>Journal Of Clinical Epidemiology.</i> 2015.                                                                                                                           |
| RR | 356 | Mobiniazadeh M, Oliyaeemanesh A, Doaee S, Nejati M, Aboee P, Azadbakht M, et al. Health technology assessment of infliximab: A rapid review of type 2 studies. <i>Journal of Isfahan Medical School.</i> 2012;30(178).                                                                                                                    |
| RR | 357 | York A, Crawford C, Walter A, Walter JAG, Jonas WB, Coeytaux R. Acupuncture research in military and veteran populations: A rapid evidence assessment of the literature. <i>Medical Acupuncture.</i> 2011;23(4):229-36.                                                                                                                   |
| RR | 358 | Cai J-Q, Chen K, Mou Y-P, Pan Y, Xu X-W, Zhou Y-C, et al. Laparoscopic versus open wedge resection for gastrointestinal stromal tumors of the stomach: a single-center 8-year retrospective cohort study of 156 patients with long-term follow-up. <i>BMC Surgery.</i> 2015;15:58-.                                                       |

|    |     |                                                                                                                                                                                                                                                                                                                                             |
|----|-----|---------------------------------------------------------------------------------------------------------------------------------------------------------------------------------------------------------------------------------------------------------------------------------------------------------------------------------------------|
| RR | 359 | Visnansky M, Mesaros S. Patient self-testing of oral anticoagulation therapy by coaguchek® xs system. Rapid health technology assessment in Slovak health care environment. <i>Value in Health</i> . 2011;14(7):A257-A8.                                                                                                                    |
| RR | 360 | Turner RM, Bird SM, Higgins JPT. The impact of study size on meta-analyses: examination of underpowered studies in Cochrane reviews. <i>Plos One</i> . 2013;8(3):e59202-e.                                                                                                                                                                  |
| RR | 361 | Hersi M, Stevens A, Quach P, Hamel C, Thavorn K, Garritty C, et al. Effectiveness of Personal Protective Equipment for Healthcare Workers Caring for Patients with Filovirus Disease: A Rapid Review. <i>Plos One</i> . 2015;10(10):e0140290-e.                                                                                             |
| RR | 362 | Doaee S, Mobinizadeh M, Oliyaeemanesh A. Rapid health technology assessment in rehabilitation hospital: Review article. <i>Journal of Isfahan Medical School</i> . 2013;31(237).                                                                                                                                                            |
| RR | 363 | Chao ST, Meier T, Godley A, Hugebeck B, Kolar M, Barrett P, et al. One-year experience with the workflow enhancement (we) team: Does continuous improvement have to be continuous? <i>International Journal of Radiation Oncology Biology Physics</i> . 2014;90(1):S744.                                                                    |
| RR | 364 | Kelly BJ, Perkins DA, Fuller JD, Parker SM. Shared care in mental illness: A rapid review to inform implementation. <i>International Journal Of Mental Health Systems</i> . 2011;5:31-.                                                                                                                                                     |
| RR | 365 | Lee C, Crawford C, Teo L, Spevak C. An analysis of the various chronic pain conditions captured in a systematic review of active self-care complementary and integrative medicine therapies for the management of chronic pain symptoms. <i>Pain Medicine (Malden, Mass)</i> . 2014;15 Suppl 1:S96-S103.                                    |
| RR | 366 | Hayden JA, Killian L, Zygmunt A, Babineau J, Martin-Misener R, Jensen JL, et al. Methods of a multi-faceted rapid knowledge synthesis project to inform the implementation of a new health service model: Collaborative Emergency Centres. <i>Systematic Reviews</i> . 2015;4(1).                                                           |
| RR | 367 | Toomey E, Currie-Murphy L, Matthews J, Hurley DA. The effectiveness of physiotherapist-delivered group education and exercise interventions to promote self-management for people with osteoarthritis and chronic low back pain: a rapid review part I. <i>Manual Therapy</i> . 2015;20(2):265-86.                                          |
| RR | 368 | Tse Y, Charters H. Rapid response to safety incidences in a children's hospital-reconstructing a system fit for the Francis report era. <i>Archives of Disease in Childhood</i> . 2014;99:A201.                                                                                                                                             |
| RR | 369 | McMurrin M. Individual-level interventions for alcohol-related violence: A rapid evidence assessment. <i>Criminal Behaviour and Mental Health</i> . 2011.                                                                                                                                                                                   |
| RR | 370 | Twycross A, Parker R, Williams A, Gibson F. Cancer-Related Pain and Pain Management: Sources, Prevalence, and the Experiences of Children and Parents. <i>Journal Of Pediatric Oncology Nursing: Official Journal Of The Association Of Pediatric Oncology Nurses</i> . 2015;32(6):369-84.                                                  |
| RR | 371 | Vujanic G, Sandstedt B, Leuschner I, Sznajder B. Central pathology review in multicentre tumour trials-do we really need it? <i>Pediatric Blood and Cancer</i> . 2011;57(5):742.                                                                                                                                                            |
| RR | 372 | Mahon S, Redmond S, Carney P. Transparency of the medicines reimbursement system in Ireland: A quantitative analysis of the influences on reimbursement decisions [2006-2013]. <i>Value in Health</i> . 2013;16(7):A459.                                                                                                                    |
| RR | 373 | Treatments for Constipation: A Review of Systematic Reviews. Canadian Agency for Drugs and Technologies in Health Rapid Response Reports. 2014.                                                                                                                                                                                             |
| RR | 374 | Featherstone RM, Dryden DM, Foisy M, Guise J-M, Mitchell MD, Paynter RA, et al. Advancing knowledge of rapid reviews: an analysis of results, conclusions and recommendations from published review articles examining rapid reviews. <i>Systematic Reviews</i> . 2015;4:50-.                                                               |
| RR | 375 | Geng Y, Fowler CS, Fulton S. Clinical librarian support for rapid review of clinical utility of cancer molecular biomarkers. <i>Medical Reference Services Quarterly</i> . 2015;34(2):202-14.                                                                                                                                               |
| RR | 376 | Beani JC. Solar protection products: Efficacy and risks. <i>Annales de Dermatologie et de Venereologie</i> . 2012;139(4):261-72.                                                                                                                                                                                                            |
| RR | 377 | Moeller-Saxone K, Davis E, Herrman H. Promoting mental health in Asia-Pacific: Systematic review focusing on Thailand and China. <i>Asia-Pacific Psychiatry: Official Journal Of The Pacific Rim College Of Psychiatrists</i> . 2015;7(4):355-65.                                                                                           |
| RR | 378 | Ju H, Hewson K. Health technology assessment and evidence-based policy making: Queensland Department of Health experience. <i>International Journal Of Technology Assessment In Health Care</i> . 2014;30(6):595-600.                                                                                                                       |
| RR | 379 | Manrique EJC, Souza NLA, Tavares SBN, Albuquerque ZBP, Zeferino LC, Amaral RG. Analysis of the performance of 100% rapid review using an average time of 1 and 2 minutes according to the quality of cervical cytology specimens. <i>Cytopathology: Official Journal Of The British Society For Clinical Cytology</i> . 2011;22(3):195-201. |
| RR | 380 | Bragge P, Piccenna L, Middleton JW, Williams S, Creasey G, Dunlop S, et al. Developing a spinal cord injury research strategy using a structured process of evidence review and stakeholder dialogue. Part I: rapid review of SCI prioritisation literature. <i>Spinal Cord</i> . 2015;53(10):714-20.                                       |
| RR | 381 | Lee C, Crawford C, Hickey A. Mind-body therapies for the self-management of chronic pain symptoms. <i>Pain Medicine (Malden, Mass)</i> . 2014;15 Suppl 1:S21-S39.                                                                                                                                                                           |
| RR | 382 | Luckett T, Phillips J, Agar M, Virdun C, Green A, Davidson PM. Elements of effective palliative care models: a rapid review. <i>BMC Health Services Research</i> . 2014;14:136-.                                                                                                                                                            |
| RR | 383 | Van De Velde S, De Buck E, Dieltjens T, Aertgeerts B. Medicinal use of potato-derived products: Conclusions of a rapid versus full systematic review. <i>Phytotherapy Research</i> . 2011;25(5):787-8.                                                                                                                                      |

|    |     |                                                                                                                                                                                                                                                                                                                                                                 |
|----|-----|-----------------------------------------------------------------------------------------------------------------------------------------------------------------------------------------------------------------------------------------------------------------------------------------------------------------------------------------------------------------|
| RR | 384 | Szmuda T, Sloniewski P, Waszak PM, Springer J, Szmuda M. Towards a new treatment paradigm for ruptured blood blister-like aneurysms of the internal carotid artery? A rapid systematic review. <i>Journal Of Neurointerventional Surgery</i> . 2015.                                                                                                            |
| RR | 385 | Heard T, Chandra A, Culora G, Gupta SS, Herbert A, Morgan M. Use of the ThinPrep Imaging System for internal quality control of cervical cytology. <i>Cytopathology: Official Journal Of The British Society For Clinical Cytology</i> . 2013;24(4):246-53.                                                                                                     |
| RR | 386 | Qi Q, Fang G, Chen YX, Liu Y, Zhou CL, Wang J, et al. Mass vaccination campaign of hepatitis a vaccine and measles-mumps-rubella live attenuated vaccine in children in stricken regions of 4.20 lushan earthquake in Sichuan Province. <i>Chinese Journal of Evidence-Based Medicine</i> . 2014;14(5):501-4.                                                   |
| RR | 387 | Migliore A, Jefferson T, Cerbo M, Abraha I, Montedori A. Implantable devices for the closure of patent foramen ovale in adults: an Italian rapid health technology assessment. <i>Expert Review Of Medical Devices</i> . 2014;11(2):151-61.                                                                                                                     |
| RR | 388 | Polisena J, Garritty C, Umscheid CA, Kamel C, Samra K, Smith J, et al. Rapid Review Summit: an overview and initiation of a research agenda. <i>Systematic Reviews</i> . 2015;4:111-.                                                                                                                                                                           |
| RR | 389 | Lavery B, Orton S, Baker H, Ross J, Walsh R, Stevens R, et al. Transforming follow-up: Patients as true partners in a major multi-disciplinary change project. <i>European Journal of Cancer</i> . 2013;49:S438.                                                                                                                                                |
| RR | 390 | Venugopal S, Blundell J, Raja Sri A, Bennett G. Current management of iron deficiency in pregnancy at a district general hospital. <i>British Journal of Haematology</i> . 2013;161:74.                                                                                                                                                                         |
| RR | 391 | Mattivi JT, Buchberger B. [Rapid Reviews: Sisyphos' Salvation? - An Inventory]. <i>Gesundheitswesen (Bundesverband Der Arzte Des Offentlichen Gesundheitsdienstes (Germany))</i> . 2015.                                                                                                                                                                        |
| RR | 392 | Wolfenden L, Carruthers J, Wyse R, Yoong S. Translation of tobacco control programs in schools: findings from a rapid review of systematic reviews of implementation and dissemination interventions. <i>Health Promotion Journal Of Australia: Official Journal Of Australian Association Of Health Promotion Professionals</i> . 2014;25(2):136-8.            |
| RR | 393 | Van der Scheer-Horst ES, van Benthem PPG, Bruitjes TD, van Leeuwen RB, van der Zaag-Loonen HJ. The efficacy of vestibular rehabilitation in patients with benign paroxysmal positional vertigo: a rapid review. <i>Otolaryngology--Head And Neck Surgery: Official Journal Of American Academy Of Otolaryngology-Head And Neck Surgery</i> . 2014;151(5):740-5. |
| RR | 394 | Antidepressants in Elderly Patients with Major and Minor Depression: A Review of Clinical Effectiveness and Guidelines. Canadian Agency for Drugs and Technologies in Health Rapid Response Reports. 2015.                                                                                                                                                      |
| RR | 395 | Yadav R, Shah AK, Loeb JA, Swamy MN, Agarwal R. A novel unsupervised spike sorting algorithm for intracranial EEG. Conference proceedings : Annual International Conference of the IEEE Engineering in Medicine and Biology Society IEEE Engineering in Medicine and Biology Society Conference. 2011;2011:7545-8.                                              |
| RR | 396 | Tricco AC, Antony J, Zarin W, Striffler L, Ghassemi M, Ivory J, et al. A scoping review of rapid review methods. <i>BMC Medicine</i> . 2015;13(1).                                                                                                                                                                                                              |
| RR | 397 | Golfam M, Beall R, Brehaut J, Saeed S, Relton C, Ashbury FD, et al. Comparing alternative design options for chronic disease prevention interventions. <i>European Journal Of Clinical Investigation</i> . 2015;45(1):87-99.                                                                                                                                    |
| RR | 398 | Van der Veen EL, van Hulst RA, de Ru JA. Hyperbaric Oxygen Therapy in Acute Acoustic Trauma: A Rapid Systematic Review. <i>Otolaryngology--Head And Neck Surgery: Official Journal Of American Academy Of Otolaryngology-Head And Neck Surgery</i> . 2014;151(1):42-5.                                                                                          |
| RR | 399 | Vogus A, Graff K. PEPFAR Transitions to Country Ownership: Review of Past Donor Transitions and Application of Lessons Learned to the Eastern Caribbean. <i>Global Health, Science And Practice</i> . 2015;3(2):274-86.                                                                                                                                         |
| RR | 400 | Liew Y, De Berker D, Sansom J. Rapid clinical review of patients assessed by a teledermatology service: Analysis of pathways and outcomes. <i>British Journal of Dermatology</i> . 2014;171:138.                                                                                                                                                                |
| RR | 401 | Hwang EH, Hwang M, Shin BC, Lee GS. Effect of Tai Chi as therapeutic exercise on blood pressure: Rapid systematic review. <i>Journal of Alternative and Complementary Medicine</i> . 2014;20(5):A57.                                                                                                                                                            |
| RR | 402 | Banbury A, Roots A, Nancarrow S. Rapid review of applications of e-health and remote monitoring for rural residents. <i>The Australian Journal Of Rural Health</i> . 2014;22(5):211-22.                                                                                                                                                                         |
| RR | 403 | Souza KM, Goncalves L. HTA studies on orphan drugs by rebratsxmembers. <i>Value in Health</i> . 2014;17(7):A540.                                                                                                                                                                                                                                                |
| RR | 404 | Briand C, Menear M. Implementing a continuum of evidence-based psychosocial interventions for people with severe mental illness: Part 2 - Review of critical implementation issues. <i>Canadian Journal of Psychiatry</i> . 2014;59(4):187-95.                                                                                                                  |
| RR | 405 | Exploring the method and process of rapid review. <i>Chinese Journal of Evidence-Based Medicine</i> . 2014;14(5):497-500.                                                                                                                                                                                                                                       |
| RR | 406 | Parker S, Fuller J. Are nurses well placed as care co-ordinators in primary care and what is needed to develop their role: a rapid review? <i>Health &amp; Social Care In The Community</i> . 2015.                                                                                                                                                             |
| RR | 407 | Ball K, Carver A, Downing K, Jackson M, O'Rourke K. Addressing the social determinants of inequities in physical activity and sedentary behaviours. <i>Health Promotion International</i> . 2015;30 Suppl 2:ii8-ii19.                                                                                                                                           |



|        |     |                                                                                                                                                                                                                                                                                                                                     |
|--------|-----|-------------------------------------------------------------------------------------------------------------------------------------------------------------------------------------------------------------------------------------------------------------------------------------------------------------------------------------|
| RR     | 408 | Bavolek RA, Aubin CD, Kim AJ. Team-based learning: Electrocardiogram interpretation and application for emergency medicine residents. <i>Academic Emergency Medicine</i> . 2013;20(5):S346.                                                                                                                                         |
| RR     | 409 | Li A, Giaddui T, Chen W, Cui Y, McNulty S, Freedman G, et al. An analysis of rapid review cases that failed to meet the RTOG 1005 contouring and dose-volume criteria. <i>International Journal of Radiation Oncology Biology Physics</i> . 2013;87(2):S228.                                                                        |
| RR     | 410 | Neville FG, Goodall CA, Williams DJ, Donnelly PD. Violence brief interventions: A rapid review. <i>Aggression and Violent Behavior</i> . 2014;19(6):692-8.                                                                                                                                                                          |
| RR     | 411 | Wegner I, Niesten MEF, van Werkhoven CH, Grolman W. Rapid Systematic Review of the Epley Maneuver versus Vestibular Rehabilitation for Benign Paroxysmal Positional Vertigo. <i>Otolaryngology--Head And Neck Surgery: Official Journal Of American Academy Of Otolaryngology-Head And Neck Surgery</i> . 2014;151(2):201-7.        |
| RR     | 412 | Oh J, Calabresi PA. Emerging injectable therapies for multiple sclerosis. <i>The Lancet Neurology</i> . 2013;12(11):1115-26.                                                                                                                                                                                                        |
| RR     | 413 | Phillips J. Palliative care systems: Evidence for key models of care elements. <i>Asia-Pacific Journal of Clinical Oncology</i> . 2013;9:95.                                                                                                                                                                                        |
| RR     | 414 | Hinchliffe A. Minor ailments schemes: A rapid review of the evidence. <i>International Journal of Pharmacy Practice</i> . 2012;20:39-40.                                                                                                                                                                                            |
| RR     | 415 | Loveday HP, Wilson JA, Kerr K, Pitchers R, Walker JT, Browne J. Association between healthcare water systems and <i>Pseudomonas aeruginosa</i> infections: a rapid systematic review. <i>The Journal Of Hospital Infection</i> . 2014;86(1):7-15.                                                                                   |
| RR     | 416 | Do Nascimento Tavares SB, De Souza NLA, Manrique EJC, Azara CZS, Da Silveira EA, Amaral RG. Internal quality control for cervical cytopathology: Comparison of potential false-negatives detected at rapid prescreening and at 100% rapid review. <i>Acta Cytologica</i> . 2014;58(5):439-45.                                       |
| RR     | 417 | Konnyu KJ, Kwok E, Skidmore B, Moher D. The effectiveness and safety of emergency department short stay units: a rapid review. <i>Open Medicine: A Peer-Reviewed, Independent, Open-Access Journal</i> . 2012;6(1):e10-e6.                                                                                                          |
| RR     | 418 | Gabapentin for Adults with Neuropathic Pain: A Review of the Clinical Evidence and Guidelines. Canadian Agency for Drugs and Technologies in Health Rapid Response Reports. 2014.                                                                                                                                                   |
| RR     | 419 | Harker J, Kleijnen J. What is a rapid review? A methodological exploration of rapid reviews in Health Technology Assessments. <i>International Journal Of Evidence-Based Healthcare</i> . 2012;10(4):397-410.                                                                                                                       |
| RR     | 420 | McCullough AL, Haycock JC, Forward DP, Moran CG. Early management of the severely injured major trauma patient. <i>British Journal Of Anaesthesia</i> . 2014;113(2):234-41.                                                                                                                                                         |
| RR     | 421 | Munn Z, Lockwood C, Moola S. The Development and Use of Evidence Summaries for Point of Care Information Systems: A Streamlined Rapid Review Approach. <i>Worldviews On Evidence-Based Nursing / Sigma Theta Tau International, Honor Society Of Nursing</i> . 2015;12(3):131-8.                                                    |
| RR     | 422 | Fiscella K, Tobin JN, Carroll JK, He H, Ogedegbe G. Ethical oversight in quality improvement and quality improvement research: new approaches to promote a learning health care system. <i>BMC Medical Ethics</i> . 2015;16(1):63-.                                                                                                 |
| RR     | 423 | Davis C, Tomas J. Care of the dying: how do we replace the Liverpool Care Pathway? <i>British Medical Bulletin</i> . 2014;112(1):5-15.                                                                                                                                                                                              |
| RR     | 424 | Blank L, Coster J, O' Cathain A, Knowles E, Tosh J, Turner J, et al. The appropriateness of, and compliance with, telephone triage decisions: a systematic review and narrative synthesis. <i>Journal Of Advanced Nursing</i> . 2012;68(12):2610-21.                                                                                |
| RR     | 425 | Oh HC, Ng WH. Rapid health technology assessment-intrathecal baclofen pump therapy for intractable spasticity. <i>Proceedings of Singapore Healthcare</i> . 2011;20:66.                                                                                                                                                             |
| RR     | 426 | Drennan VM, Halter M, Brearley S, Carneiro W, Gabe J, Gage H, et al. Investigating the contribution of physician assistants to primary care in England: a mixed-methods study. 2014.                                                                                                                                                |
| RR     | 427 | Dangott B, Salama M. Automated image analysis and scoring of tartrate resistance acid phosphatase preparations. <i>Laboratory Investigation</i> . 2012;92:331A.                                                                                                                                                                     |
| RR     | 428 | Hinrichs S, Jahagirdar D, Miani C, Guerin B, Nolte E. Learning for the NHS on procurement and supply chain management: a rapid evidence assessment. <i>NIHR Journals Library</i> . 2014.                                                                                                                                            |
| RR     | 429 | Brearley SG, Stamatakis Z, Addington-Hall J, Foster C, Hodges L, Jarrett N, et al. The physical and practical problems experienced by cancer survivors: a rapid review and synthesis of the literature. <i>European Journal Of Oncology Nursing: The Official Journal Of European Oncology Nursing Society</i> . 2011;15(3):204-12. |
| RR     | 430 | Moyad MA. Heart health = urologic health and heart unhealthy = urologic unhealthy: Rapid review of lifestyle changes and dietary supplements. <i>Urologic Clinics of North America</i> . 2011;38(3):359-67.                                                                                                                         |
| CRD RR | 431 | Pre-emptive oral non-steroidal anti-inflammatory drugs or acetaminophen for knee arthroscopy: a rapid review (Structured abstract). <i>Health Technology Assessment Database [Internet]</i> . 2014; (3).                                                                                                                            |
| CRD RR | 432 | Pron G. Coronary revascularization in ischemic heart failure patients: a rapid review (Structured abstract). <i>Health Technology Assessment Database [Internet]</i> . 2013; (3).                                                                                                                                                   |
| CRD RR | 433 | Schaink A, Lambrinos A. Vasodilators for in-hospital heart failure management: a rapid review (update) (Structured abstract). <i>Health Technology Assessment Database [Internet]</i> . 2015; (3).                                                                                                                                  |
| CRD RR | 434 | Brener S. Local infiltration analgesia in hip and knee arthroplasty: a rapid review (Structured abstract). <i>Health Technology Assessment Database [Internet]</i> . 2013; (3).                                                                                                                                                     |

|        |     |                                                                                                                                                                                                                                                                                                |
|--------|-----|------------------------------------------------------------------------------------------------------------------------------------------------------------------------------------------------------------------------------------------------------------------------------------------------|
| CRD RR | 435 | Bracing after knee arthroscopy: a rapid review (Structured abstract). Health Technology Assessment Database [Internet]. 2014; (3).                                                                                                                                                             |
| CRD RR | 436 | Preoperative shower or bath with antiseptics before knee arthroscopy: a rapid review (Structured abstract). Health Technology Assessment Database [Internet]. 2014; (3).                                                                                                                       |
| CRD RR | 437 | Pron G. Early mobilization and ambulation in hospitalized heart failure patients: a rapid review (Structured abstract). Health Technology Assessment Database [Internet]. 2013; (3).                                                                                                           |
| CRD RR | 438 | Intra-articular analgesia after knee arthroscopy: a rapid review (Structured abstract). Health Technology Assessment Database [Internet]. 2014; (3).                                                                                                                                           |
| CRD RR | 439 | Costello RB, Lentino CV, Boyd CC, O'Connell ML, Crawford CC, Sprengel ML, et al. The effectiveness of melatonin for promoting healthy sleep: a rapid evidence assessment of the literature (Provisional abstract). Database of Abstracts of Reviews of Effects [Internet]. 2014; (2):[106 p.]. |
| CRD RR | 440 | Monotherapy versus combination therapy for adults hospitalized for community-acquired pneumonia: a rapid review (Structured abstract). Health Technology Assessment Database [Internet]. 2013; (3).                                                                                            |
| CRD RR | 441 | Cost-effectiveness of urgent care for transient ischemic attack: an economic rapid review (Structured abstract). Health Technology Assessment Database [Internet]. 2015; (3).                                                                                                                  |
| CRD RR | 442 | Birmingham SL. Pulmonary rehabilitation setting for adults with chronic obstructive pulmonary disease (COPD): an economic rapid review (Structured abstract). Health Technology Assessment Database [Internet]. 2015; (3).                                                                     |
| CRD RR | 443 | McMartin K. Preoperative cardiac stress tests for noncardiac surgery: a rapid review (Structured abstract). Health Technology Assessment Database [Internet]. 2014; (3).                                                                                                                       |
| CRD RR | 444 | Hemoglobin A1c testing in diabetes: a rapid review (Structured abstract). Health Technology Assessment Database [Internet]. 2014; (3).                                                                                                                                                         |
| CRD RR | 445 | Migliore A, Jefferson T, Cerbo M, Abraha I, Montedori A. Implantable devices for the closure of patent foramen ovale in adults: an Italian rapid health technology assessment (Provisional abstract). Database of Abstracts of Reviews of Effects [Internet]. 2014; (2):[151-61 pp.].          |
| CRD RR | 446 | Schaik A. Optimized timing of thrombolytic therapy for the treatment of stroke: a rapid review (Structured abstract). Health Technology Assessment Database [Internet]. 2013; (3).                                                                                                             |
| CRD RR | 447 | Luckett T, Phillips J, Agar M, Virdun C, Green A, Davidson PM. Elements of effective palliative care models: a rapid review (Provisional abstract). BMC Health Services Research [Internet]. 2014; 14(1):[136 p.].                                                                             |
| CRD RR | 448 | Dorresteyn PM, Ipenburg NA, Murphy KJ, Smit M, Vulpen JK, Wegner I, et al. Rapid systematic review of normal audiometry results as a predictor for benign paroxysmal positional vertigo (Provisional abstract). Otolaryngology - Head and Neck Surgery [Internet]. 2014; 150(6):[919-24 pp.].  |
| CRD RR | 449 | Roberfroid D, San Miguel L, Paulus D. Non-invasive markers of subclinical atherosclerosis for predicting a primary cardiovascular event: a rapid systematic review (Structured abstract). Health Technology Assessment Database [Internet]. 2015; (3).                                         |
| CRD RR | 450 | Fergenbaum J. Harms of Prostate-Specific Antigen (PSA) screening in prostate cancer: a rapid review (Structured abstract). Health Technology Assessment Database [Internet]. 2015; (3).                                                                                                        |
| CRD RR | 451 | Total hip arthroplasty versus hemiarthroplasty for displaced femoral neck fractures: a rapid review (Structured abstract). Health Technology Assessment Database [Internet]. 2013; (3).                                                                                                        |
| CRD RR | 452 | Brener S. Anesthesia among patients undergoing knee arthroplasty: a rapid review (Structured abstract). Health Technology Assessment Database [Internet]. 2013; (3).                                                                                                                           |
| CRD RR | 453 | Nikitovic M. Antibiotic-laden bone cement for primary knee arthroplasty: a rapid review (Structured abstract). Health Technology Assessment Database [Internet]. 2013; (3).                                                                                                                    |
| CRD RR | 454 | Nikitovic M. Clinical utility of echocardiography for patients with hip fracture: a rapid review (Structured abstract). Health Technology Assessment Database [Internet]. 2013; (3).                                                                                                           |
| CRD RR | 455 | Ghazipura M. Shorter versus longer duration of antibiotic therapy in patients with community-acquired pneumonia: a rapid review (Structured abstract). Health Technology Assessment Database [Internet]. 2013; (3).                                                                            |
| CRD RR | 456 | Ghazipura M. Care coordination on postacute stroke, chronic obstructive pulmonary disease, and heart failure clients: a rapid review (Structured abstract). Health Technology Assessment Database [Internet]. 2015; (3).                                                                       |
| CRD RR | 457 | Ghazipura M. Usefulness of urinary antigen testing for Legionella in the treatment of community-acquired pneumonia: a rapid review (Structured abstract). Health Technology Assessment Database [Internet]. 2013; (3).                                                                         |
| CRD RR | 458 | Chaiyachati KH, Ogbuaji O, Price M, Suthar AB, Negussie EK, Barnighausen T. Interventions to improve adherence to antiretroviral therapy: a rapid systematic review (Provisional abstract). Database of Abstracts of Reviews of Effects [Internet]. 2014; (2):[S187-s204 pp.].                 |
| CRD RR | 459 | Brener S. Optimal timing of hip fracture surgery: a rapid review (Structured abstract). Health Technology Assessment Database [Internet]. 2013; (3).                                                                                                                                           |
| CRD RR | 460 | Scheer-Horst ES, Benthem PP, Bruinijes TD, Leeuwen RB, Zaag-Loonen HJ. The efficacy of vestibular rehabilitation in patients with benign paroxysmal positional vertigo: a rapid review (Provisional abstract). Database of Abstracts of Reviews of Effects [Internet]. 2014; (2):[740-5 pp.].  |

|        |     |                                                                                                                                                                                                                                                                                                                                                           |
|--------|-----|-----------------------------------------------------------------------------------------------------------------------------------------------------------------------------------------------------------------------------------------------------------------------------------------------------------------------------------------------------------|
| CRD RR | 461 | Hinrichs S, Jahagirdar D, Miani C, Guerin B, Nolte E. Learning for the NHS on procurement and supply chain management: a rapid evidence assessment (Structured abstract). Health Technology Assessment Database [Internet]. 2014; (3).                                                                                                                    |
| CRD RR | 462 | Toomey E, Currie-Murphy L, Matthews J, Hurley DA. The effectiveness of physiotherapist-delivered group education and exercise interventions to promote self-management for people with osteoarthritis and chronic low back pain: rapid review Part I (Provisional abstract). Database of Abstracts of Reviews of Effects [Internet]. 2014; (2);[epub p.]. |
| CRD RR | 463 | Simultaneous or staged bilateral knee arthroplasty: a rapid review (Structured abstract). Health Technology Assessment Database [Internet]. 2013; (3).                                                                                                                                                                                                    |
| CRD RR | 464 | Brener S. The effectiveness of cement in primary hip replacements: a rapid review (Structured abstract). Health Technology Assessment Database [Internet]. 2013; (3).                                                                                                                                                                                     |
| CRD RR | 465 | Dennett L, Harstall C. Stingray catheter and guidewire for recanalization of coronary chronic total occlusions: A rapid evidence assessment (Structured abstract). Health Technology Assessment Database [Internet]. 2013; (3);[28 p.].                                                                                                                   |
| CRD RR | 466 | Turner J, Preston L, Booth A, O'Keeffe C, Campbell F, Jesurasa A, et al. What evidence is there for a relationship between organisational features and patient outcomes in congenital heart disease services? A rapid review (Structured abstract). Health Technology Assessment Database [Internet]. 2014; (3).                                          |
| CRD RR | 467 | Wegner I, Niesten ME, Werkhoven CH, Grolman W. Rapid systematic review of the Epley maneuver versus vestibular rehabilitation for benign paroxysmal positional vertigo (Provisional abstract). Database of Abstracts of Reviews of Effects [Internet]. 2014; (2);[201-7 pp.].                                                                             |
| CRD RR | 468 | Antibiotic coverage in atypical pathogens for adults hospitalized with community-acquired pneumonia: a rapid review (Structured abstract). Health Technology Assessment Database [Internet]. 2013; (3).                                                                                                                                                   |
| CRD RR | 469 | Brener S. Electrocardiograms for diagnosing ischemia as a precipitant to acute heart failure: a rapid review (Structured abstract). Health Technology Assessment Database [Internet]. 2013; (3).                                                                                                                                                          |
| CRD RR | 470 | Schaink A. Vasodilators for in-hospital heart failure management: a rapid review (Structured abstract). Health Technology Assessment Database [Internet]. 2013; (3).                                                                                                                                                                                      |
| CRD RR | 471 | Severity assessment tools for patients with community-acquired pneumonia: a rapid review (Structured abstract). Health Technology Assessment Database [Internet]. 2013; (3).                                                                                                                                                                              |
| CRD RR | 472 | Reinink H, Wegner I, Stegeman I, Grolman W. Rapid systematic review of repeated application of the Epley maneuver for treating posterior BPPV (Provisional abstract). Database of Abstracts of Reviews of Effects [Internet]. 2014; (2);[399-406 pp.].                                                                                                    |
| CRD RR | 473 | Effect of a 60-minute door-to-needle tissue plasminogen activator on stroke disability: a rapid review (Structured abstract). Health Technology Assessment Database [Internet]. 2015; (3).                                                                                                                                                                |
| CRD RR | 474 | Brener S. Chest X-rays for diagnosing pulmonary infection as a precipitant of acute heart failure: a rapid review (Structured abstract). Health Technology Assessment Database [Internet]. 2013; (3).                                                                                                                                                     |
| CRD RR | 475 | Predictive validity of tools used to assess the risk of unplanned admissions: A rapid review of the evidence (Structured abstract). Health Technology Assessment Database [Internet]. 2014; (3).                                                                                                                                                          |
| CRD RR | 476 | Testing vitamin B12 levels in neuropathy, alopecia, dizziness, and fatigue: a rapid review (Structured abstract). Health Technology Assessment Database [Internet]. 2014; (3).                                                                                                                                                                            |
| CRD RR | 477 | Ultrafiltration in heart failure: a rapid review (Structured abstract). Health Technology Assessment Database [Internet]. 2015; (3).                                                                                                                                                                                                                      |
| CRD RR | 478 | Optimal onset-to-admission interval for inpatient stroke rehabilitation: a rapid review (Structured abstract). Health Technology Assessment Database [Internet]. 2013; (3).                                                                                                                                                                               |
| CRD RR | 479 | Jang BH, Lee HY, Jung YJ, An JH. Efficacy of atomoxetine and methylphenidate in attention deficits hyperactivity disorder in adults: a rapid review (Structured abstract). Health Technology Assessment Database [Internet]. 2012; (3).                                                                                                                   |
| CRD RR | 480 | Bond K, Dennett L, Harstall C, Yan C, Chuck A. Total prosthetic replacement of the temporomandibular joint: a rapid evidence assessment and economic analysis (Structured abstract). Health Technology Assessment Database [Internet]. 2013; (3).                                                                                                         |
| CRD RR | 481 | Sehatazadeh S. Effectiveness of increased intensity of rehabilitation in post-stroke patients: a rapid review (Structured abstract). Health Technology Assessment Database [Internet]. 2013; (3).                                                                                                                                                         |
| CRD RR | 482 | Yang ZX, Shen JT, Li YP, Zhao K, Shi CH, Xiao Y, et al. Helical tomotherapy for cancer treatment: a rapid health technology assessment (Provisional abstract). Database of Abstracts of Reviews of Effects [Internet]. 2014; (2);[192-218 pp.].                                                                                                           |
| CRD RR | 483 | Sehatazadeh S. Transient ischemic attack: where can patients receive optimal care? A rapid review (Structured abstract). Health Technology Assessment Database [Internet]. 2013; (3).                                                                                                                                                                     |
| CRD RR | 484 | Nikitovic M. Intramedullary nails in comparison with sliding hip screws for intertrochanteric hip fractures: a rapid review (Structured abstract). Health Technology Assessment Database [Internet]. 2013; (3).                                                                                                                                           |
| CRD RR | 485 | McMartin K. B-type natriuretic peptide testing: a rapid review (Structured abstract). Health Technology Assessment Database [Internet]. 2013; (3).                                                                                                                                                                                                        |
| CRD RR | 486 | Nikitovic M. Intensity of rehabilitation during the acute hospitalization period after hip or knee arthroplasty: a rapid review (Structured abstract). Health Technology Assessment Database [Internet]. 2013; (3).                                                                                                                                       |

|        |     |                                                                                                                                                                                                                                                                                                        |
|--------|-----|--------------------------------------------------------------------------------------------------------------------------------------------------------------------------------------------------------------------------------------------------------------------------------------------------------|
| CRD RR | 487 | Criteria for switching from intravenous to oral antibiotics in patients hospitalized with community-acquired pneumonia: a rapid review (Structured abstract). Health Technology Assessment Database [Internet]. 2013; (3).                                                                             |
| CRD RR | 488 | Duijn JG, Isfordink LM, Nij Bijvank JA, Stapper CW, Vuren AJ, Wegner I, et al. Rapid systematic review of the Epley maneuver for treating posterior canal benign paroxysmal positional vertigo (Provisional abstract). Database of Abstracts of Reviews of Effects [Internet]. 2014; (2):[925-32 pp.]. |
| CRD RR | 489 | Brener S. Nerve blocks for pain management in patients with hip fractures: a rapid review (Structured abstract). Health Technology Assessment Database [Internet]. 2013; (3).                                                                                                                          |

CSR: Cochrane systematic reviews; SR: non-Cochrane systematic reviews; RR: rapid reviews; CRD RR: Rapid reviews of the University of York, databases of the Center for Reviews and Dissemination

For peer review only

**Characteristics of stakeholder involvement in systematic and rapid reviews:  
a methodological review in the area of health services research**

**Jonas Feldmann, Milo A. Puhan, Margot Mutsch\***

**Supplementary Table S2:**

**Characteristics of the study population by type of included review**

|                                    | <b>Cochrane<br/>SR (%)</b> | <b>Non-Cochrane<br/>SR (%)</b> | <b>RR (%)</b>             | <b>CRD RR<br/>(%)</b> | <b>Total (%)</b>        |
|------------------------------------|----------------------------|--------------------------------|---------------------------|-----------------------|-------------------------|
| <b>Setting</b>                     |                            |                                |                           |                       |                         |
| Hospital setting,<br>inpatients    | 7 (23)                     | 1 (3)                          | 8 (27)                    | 10 (33)               | 26 (22)                 |
| Outpatients                        | 9 (30)                     | 9 (30)                         | 7 (23)                    | 4 (13)                | 29 (24)                 |
| Home setting                       | 0                          | 3 (10)                         | 0                         | 3 (10)                | 6 (5)                   |
| Community setting                  | 5 (17)                     | 10 (33)                        | 13 (43)                   | 7 (23)                | 35 (29)                 |
| Multiple                           | 9 (30)                     | 5 (17)                         | 0                         | 4 (13)                | 18 (15)                 |
| Other                              | 0                          | 2 (7)                          | 2 (7)                     | 2 (7)                 | 6 (5)                   |
| <b>Population size<sup>1</sup></b> |                            |                                |                           |                       |                         |
| Median<br>(range)                  | 733<br>(0; 390,769)        | 2,846.5<br>(36; 4,650,877)     | 2,717<br>(102; 1,700,000) | 349.5<br>(0; 372,746) | 1,622<br>(0; 4,650,877) |
| <b>Population type</b>             |                            |                                |                           |                       |                         |
| Patients with<br>disease/condition | 18 (60)                    | 18 (60)                        | 20 (67)                   | 26 (87)               | 82 (68)                 |
| Healthy population                 | 9 (30)                     | 8 (27)                         | 9 (30)                    | 3 (10)                | 29 (24)                 |
| Other                              | 3 (10)                     | 4 (13)                         | 1 (3)                     | 1 (3)                 | 9 (8)                   |
| <b>Age range (yrs)</b>             |                            |                                |                           |                       |                         |
| Adults (>18)                       | 20 (67)                    | 14 (47)                        | 13 (43)                   | 25 (83)               | 72 (60)                 |

|                     |         |         |         |          |          |
|---------------------|---------|---------|---------|----------|----------|
| Adolescents (13-18) | 2 (7)   | 1 (3)   | 1 (3)   | 1 (3)    | 5 (4)    |
| Children (0-12)     | 3 (10)  | 1 (3)   | 1 (3)   | 0        | 5 (4)    |
| Youth (0-18)        | 1 (3)   | 2 (7)   | 0       | 0        | 3 (3)    |
| Other subgroups     | 1 (3)   | 6 (20)  | 2 (7)   | 3 (10)   | 12 (10)  |
| Population          | 3 (10)  | 6 (20)  | 13 (43) | 1 (3)    | 23 (19)  |
| <b>Sex</b>          |         |         |         |          |          |
| Females and males   | 29 (97) | 28 (93) | 24 (80) | 30 (100) | 111 (93) |
| Females only        | 1 (3)   | 1 (3)   | 4 (13)  | 0        | 6 (5)    |
| Males only          | 0       | 1 (3)   | 2 (7)   | 0        | 3 (3)    |

CRD: University of York, Centre for Reviews and Dissemination; RR: rapid review; SR: systematic review; WHO: World Health Organisation

<sup>1</sup> Zero means that there were no participants mentioned or included in the review.

# BMJ Open

## Characteristics of stakeholder involvement in systematic and rapid reviews: a methodological review in the area of health services research

|                                 |                                                                                                                                                                                                                                                                                             |
|---------------------------------|---------------------------------------------------------------------------------------------------------------------------------------------------------------------------------------------------------------------------------------------------------------------------------------------|
| Journal:                        | <i>BMJ Open</i>                                                                                                                                                                                                                                                                             |
| Manuscript ID                   | bmjopen-2018-024587.R3                                                                                                                                                                                                                                                                      |
| Article Type:                   | Research                                                                                                                                                                                                                                                                                    |
| Date Submitted by the Author:   | 10-Jul-2019                                                                                                                                                                                                                                                                                 |
| Complete List of Authors:       | Feldmann, Jonas; University of Zurich, Institute of Epidemiology, Biostatistics and Prevention<br>Puhan, Milo; University of Zurich, Institute of Epidemiology, Biostatistics & Prevention<br>Mütsch, Margot; University of Zurich, Institute of Epidemiology, Biostatistics and Prevention |
| <b>Primary Subject Heading</b>: | Research methods                                                                                                                                                                                                                                                                            |
| Secondary Subject Heading:      | Health services research, Public health                                                                                                                                                                                                                                                     |
| Keywords:                       | stakeholder, systematic review, rapid review, evidence                                                                                                                                                                                                                                      |
|                                 |                                                                                                                                                                                                                                                                                             |

SCHOLARONE™  
Manuscripts



1  
2  
3  
4 **Characteristics of stakeholder involvement in systematic and rapid**  
5 **reviews:**  
6  
7  
8 **a methodological review in the area of health services research**  
9  
10  
11  
12  
13  
14

15 **Jonas Feldmann, Milo A. Puhan, Margot Mutsch\***  
16  
17  
18  
19

20 For all authors: Department of Epidemiology, Epidemiology, Biostatistics and Prevention  
21 Institute (EBPI), University of Zurich, Zurich, Switzerland  
22  
23  
24  
25  
26  
27  
28  
29

30 \* Corresponding author: Margot Mutsch, Department of Epidemiology, Epidemiology,  
31 Biostatistics and Prevention Institute (EBPI), University of Zurich, Hirschengraben 84, 8001  
32 Zurich, Switzerland. Phone: +41 44 634 4857; Email: [margot.muetsch@uzh.ch](mailto:margot.muetsch@uzh.ch).  
33  
34  
35  
36  
37  
38  
39  
40  
41  
42  
43  
44  
45  
46  
47  
48  
49  
50  
51  
52  
53  
54  
55  
56  
57  
58  
59  
60

## ABSTRACT

**Objective** Engaging stakeholders in reviews is considered to generate more relevant evidence and to facilitate dissemination and use. As little is known about stakeholder involvement, we assessed the characteristics of their engagement in systematic and rapid reviews and the methodological quality of included studies. Stakeholders were people with a particular interest in the research topic.

**Design** Methodological review

**Search strategy** Four databases (Medline, Embase, Cochrane database of systematic reviews, databases of the University of York, Center for Reviews and Dissemination (CRD)) were searched based on an a priori protocol. Four types of reviews (Cochrane and non-Cochrane systematic reviews, rapid and CRD rapid reviews) were retrieved between January, 2011 and October, 2015, pooled by potential review type and duplicates excluded. Articles were randomly ordered and screened for inclusion and exclusion criteria until 30 reviews per group were reached. Their methodological quality was assessed using AMSTAR and stakeholder characteristics were collected.

**Results** In total, 57,822 deduplicated citations were detected with potential non-Cochrane systematic reviews being the biggest group (56,986 records). We found stakeholder involvement in 13% (4/30) of Cochrane, 20% (6/30) of non-Cochrane, 40% (13/30) of rapid and 93% (28/30) of CRD reviews. Overall, 33% (17/51) of the responding contact authors mentioned positive effects of stakeholder involvement. A conflict of interest statement remained unmentioned in 40% (12/30) of non-Cochrane and in 27% (8/30) of rapid reviews, but not in Cochrane or CRD reviews. At most, half of non-Cochrane and rapid reviews mentioned an a priori study protocol in contrast to approximately all Cochrane and CRD reviews.

**Conclusion** Stakeholder engagement was not general practice, except for CRD reviews, although it was more common in rapid reviews. Reporting factors, such as including an a priori study protocol and a conflict of interest statement should be considered in conjunction with involving stakeholders.

1  
2  
3  
4  
5  
6  
7 **Keywords:** stakeholder, systematic review, rapid review, evidence  
8  
9  
10  
11  
12  
13

#### 14 **STRENGTHS AND LIMITATIONS OF THIS STUDY**

- 15 • A systematic approach to assess stakeholder engagement in systematic and rapid  
16 reviews was used to fill the gap and to provide an overview of the current situation.  
17
- 18 • The different review types were able to inform on stakeholder involvement and pointed  
19 to potential improvements.  
20
- 21 • With the scope of this study being restricted to health services research we intended to  
22 focus on a best-case approach where the context is considered most important and  
23 therefore, stakeholder involvement might be most regularly, but the overall findings  
24 might not be applicable beyond this domain.  
25
- 26 • The majority of studies were from higher-income countries limiting the generalizability  
27 beyond this setting.  
28
- 29 • The perception and the reporting of stakeholder involvement might be influenced by the  
30 lack of a uniform definition of stakeholders and depend on the criteria used.  
31  
32  
33  
34  
35  
36  
37  
38  
39  
40  
41  
42  
43  
44  
45  
46  
47  
48  
49  
50  
51  
52  
53  
54  
55  
56  
57  
58  
59  
60

## INTRODUCTION

Evidence synthesis remains a rapidly growing field. There are different methodological approaches and formats depending on the research question and the intended use of the review, such as scoping, systematic or rapid reviews as well as realist syntheses, policy briefs and health technology assessments. We will focus on full systematic reviews as a well-established review type in healthcare and on rapid reviews as an emerging one. A traditional full systematic review is a review that “attempts to collate all empirical evidence and that fits pre-specified eligibility criteria in order to answer a specific, usually narrow research question or intervention”. [1] Within systematic reviews, Cochrane full systematic reviews were established as “gold standard” in knowledge synthesis. A couple of studies compared Cochrane and non-Cochrane systematic reviews and found that the reporting of Cochrane systematic reviews was the most complete one [2], that they were less prone to bias due to greater transparency in reporting as well as due to the quality criteria used, such as the risk of bias assessment [3]. Furthermore, Hopewell et al. described that the inclusion of grey literature routinely performed in Cochrane systematic reviews limited publication bias and provided more conservative treatment effects compared to non-Cochrane systematic reviews without including grey literature. [4]

Rapid reviews are characterized by a less complex research question and aim to synthesize evidence within a shorter time period, with time frames ranging from one week to nine months. [5, 6] They might, therefore, be prone to be of lower validity as a consequence of accelerating and streamlining the review process. [5] However, in response to an increasing demand from stakeholders, rapid reviews are being performed more frequently than before. [6] Only few formal definitions of different rapid reviews exist and few studies have examined their methodology. [7] To cover the variety of rapid reviews we included rapid reviews listed in medical databases as well as other rapid reviews from the databases of the University of York, Center for Reviews and Dissemination ([www.crd.york.ac.uk/CRDWeb](http://www.crd.york.ac.uk/CRDWeb)), such as the Dare

1  
2  
3 reviews (Database of Abstracts of Reviews of Effects) or health technology assessments (CRD  
4 rapid reviews). Rapid reviews target specific audiences including government policymakers,  
5 health care institutions, health professionals and patient associations and research questions  
6 are often tailored to these stakeholders .[8, 9]  
7  
8  
9  
10  
11  
12

13 Stakeholder as a very broad term may include anyone affected by an issue and/or anyone  
14 who can provide input on the topic.[10, 11] Hence, not only decision makers, health  
15 professionals and their organisations are targeted, but also citizen or patients, other researchers  
16 and the media. Involving stakeholders in health services research might be possible at all  
17 stages of systematic or rapid reviews and this is often referred to as coproduction. Thus,  
18 stakeholder engagement aims participatory research and might direct the research question,  
19 define the scope and context of the review as well as contribute to the literature search, the  
20 evidence synthesis and interpretation and might facilitate dissemination and use. Therefore, it  
21 enhances the relevance of findings for policy and practice and contributes to the sustainability of  
22 health systems.[12-14] We especially focused on stakeholder involvement among health  
23 services research. This embraced the multidisciplinary field of scientific studies regarding social,  
24 financing and personal factors, organizational structures and processes, health technologies,  
25 and how these factors affect access to, the quality and cost of health care, and ultimately, our  
26 health and well-being".[15] Here, we considered the context of conducted studies and  
27 dissemination issues as most important, and we expected health services research to be the  
28 research field where stakeholders were involved most regularly.  
29  
30  
31  
32  
33  
34  
35  
36  
37  
38  
39  
40  
41  
42  
43  
44  
45  
46  
47  
48  
49  
50

## 51 **Study aim**

52 To date, little is known about the extent of stakeholder engagement in systematic and  
53 rapid reviews and there have been few efforts to directly report the specific effects regarding  
54 their involvement. We consider this information to be relevant for integrated knowledge  
55 translation, the dissemination and acceptance of systematic and rapid reviews in policy and  
56  
57  
58  
59  
60

1  
2  
3 practice. We focused on systematic and rapid reviews as they represent different types of  
4 evidence synthesis and are well-established in research and practice. In addition, reviews  
5 needed to belong to the area of health services research as an established field for systematic  
6 and rapid reviews as well as a best-case sample with a considerable extent of stakeholder  
7 involvement. We aimed to assess the extent and characteristics of stakeholder engagement in  
8 published systematic and rapid reviews and to specifically determine reporting characteristics.  
9  
10  
11  
12  
13  
14  
15  
16  
17

## 18 **METHODS**

### 19 **Study design**

20  
21  
22 Based on the pre-specified protocol this methodological review was performed to assess  
23 characteristics and reporting of stakeholder engagement in random samples of systematic and  
24 rapid reviews in the field of health services research (Supplementary File S1). A total of four  
25 types of reviews, two groups of each, systematic and rapid reviews, were assessed as they  
26 were considered to exhibit potentially differences in stakeholder involvement. This included  
27 Cochrane systematic reviews, non-Cochrane systematic reviews, rapid reviews and rapid  
28 reviews of the databases of the University of York, Center for Reviews and Dissemination (CRD  
29 rapid reviews). For the reporting of this study the PRISMA checklist was used (Supplementary  
30 File S2).  
31  
32  
33  
34  
35  
36  
37  
38  
39  
40  
41  
42  
43  
44

### 45 **Search strategy and screening**

46 For systematic reviews, we searched the Cochrane database of systematic reviews for  
47 articles including the term “systematic review” in their title or abstract (Cochrane systematic  
48 reviews) and EBSCO Medline and Embase with excluding the term “Cochrane” in title or  
49 abstract (non-Cochrane systematic reviews). Rapid reviews were searched in EBSCO Medline  
50 and Embase and in the databases of the University of York, Center for Reviews and  
51 Dissemination ([www.crd.york.ac.uk/CRDWeb](http://www.crd.york.ac.uk/CRDWeb)) (CRD rapid reviews). Sample search strategies  
52 are depicted in Supplementary Files S3a and S3b. We included studies published between  
53  
54  
55  
56  
57  
58  
59  
60

1  
2  
3 January, 2011 and December, 2015 without language restriction. Our search was completed on  
4  
5 October 22<sup>nd</sup>, 2015 and therefore, the search results for 2015 did not cover the whole year. All  
6  
7 results were pooled by review type and duplicates were excluded based on authors, journal and  
8  
9 publication year. For each of the four lists of potential study types, each reference was given a  
10  
11 unique random number using the `sample()` function available in R [16]. Each list was then  
12  
13 sorted by the random number, and the articles were screened in order for inclusion and  
14  
15 exclusion criteria by two reviewers until a total of 30 studies were reached per group (JF and  
16  
17 MM tested their consistency in assessing the inclusion and exclusion criteria for about ten  
18  
19 different studies and MM checked the assignment for about half of the study sample). Full text  
20  
21 screening was performed to ensure the decision. One review author (JF) performed data  
22  
23 extraction, supervised and spot-checked by a second researcher (MM). Disagreements were  
24  
25 resolved by consensus.  
26  
27  
28  
29

### 30 **Sample size and selection of review groups**

31  
32 As rapid reviews were often targeted to specific audiences [8, 9], they were expected to  
33  
34 involve stakeholders to a greater extent. We estimated a proportion of stakeholder involvement  
35  
36 of 0.70 for rapid reviews and of 0.25 for systematic reviews, which resulted in a minimal  
37  
38 expected difference of 0.45. For a two group-comparison, rapid and systematic reviews, with  
39  
40  $n=25$  per group there will be an estimated power of 0.88 and an alpha of 0.023. To account for  
41  
42 a potential subgroup analysis, we included a sample of  $n=30$  reviews per group, with four  
43  
44 review groups (Cochrane and non-Cochrane systematic reviews, rapid and CRD rapid reviews).  
45  
46 This resulted in an overall sample of 120 studies.  
47  
48  
49  
50

### 51 **Inclusion and exclusion criteria**

52  
53 We included reviews targeting health services research as defined by Lohr [15]: "Health  
54  
55 services research is the multidisciplinary field of scientific investigation that studies how social  
56  
57 factors, financing systems, organizational structures and processes, health technologies, and  
58  
59 personal behaviors affect access to health care, the quality and cost of health care, and  
60



1  
2  
3 ultimately, our health and well-being. Its research domains are individuals, families,  
4 organizations, institutions, communities, and populations.” Therefore, we included Health  
5 Technology Assessments (e.g. rapid reviews as part of HTAs) targeting effectiveness as well as  
6 meta-analyses and systematic reviews for effectiveness and utility, reviews of pharmaceutical  
7 trials under everyday conditions, reviews of basic research in care-related fields, reviews of  
8 quality research or of methodological developments in the field of health services research,  
9 reviews about the development and application of new technologies (ehealth) and the  
10 implementation of knowledge into clinical practice. We excluded reviews that focused  
11 exclusively on economic or cost analyses, performed a narrative review, an overview of reviews  
12 or a protocol of a systematic review in order not to mix so different methodological approaches.  
13 The following study types were also excluded: Reviews of efficacy studies without assessing the  
14 quality of life, reviews including clinical efficacy trials phase I to III, epidemiological reviews to  
15 assess determinants or risk factors, non-human studies, establishment of databases or  
16 registries, reviews with unclear design or description of the intervention.  
17  
18  
19  
20  
21  
22  
23  
24  
25  
26  
27  
28  
29  
30  
31  
32  
33  
34

### 35 **Data extraction**

36 Stakeholders were defined as people with a particular interest in the research topic (but  
37 were not members of the primary research team).[10, 17] We evaluated any kind of stakeholder  
38 involvement and recorded different groups of stakeholders: Institutional health care providers,  
39 representatives of hospitals or community services, patients/consumers, participants of  
40 government agencies and health care policymakers at Federal, State and local levels,  
41 associations of health professionals and researchers (if not members of the primary study  
42 team). If available, we identified their fields and stages of involvement as well as their  
43 contribution to the study. This included all review steps, such as formulating the research  
44 question(s), determining study characteristics, contributing to the writing of the protocol,  
45 participating within the review process with searching, screening, data extraction, synthesizing,  
46 interpreting the study results and/or establishing recommendations. In addition, we extracted  
47 the following data: institution where the review was performed, contact details of the  
48  
49  
50  
51  
52  
53  
54  
55  
56  
57  
58  
59  
60

1  
2  
3 corresponding author, the type of intervention, study setting, characteristics of the population  
4 (sample size, age range, sex), funding, declared conflict of interest, year of publication. The  
5 methodological quality of included articles was assessed using the AMSTAR tool, a  
6 measurement tool for the assessment of the methodological quality of systematic reviews.[18]  
7  
8 Where available, our rating was compared with an already existing one from the “health  
9 evidence” or “health systems evidence” platforms.[19, 20] Both quality ratings were then  
10 categorized as strong ( $\geq 8$ ), moderate (4-7) or weak ( $< 4$ ). In the absence of a quality assessment  
11 tool for rapid reviews, we used AMSTAR also for rapid reviews, being aware that this might  
12 result in lower rating scores due to abbreviated procedures. In addition, the use of the PRISMA  
13 checklist was recorded when mentioned in the articles.[21] AMSTAR ratings are presented as  
14 Supplementary file S4, study characteristics as Supplementary file S5.

15  
16 To ascertain stakeholder engagement as well as to assess the extent or stages of their  
17 involvement, pre-formulated questions were sent by email to the contact authors of the included  
18 articles. We asked them, if there had been any stakeholder involvement (yes or no) and if so, to  
19 specify the number of stakeholders, the stages of involvement and their self-assessed  
20 estimation of the effect of stakeholder engagement on the review outcome. In case of missing  
21 responses, one reminder was sent.

22  
23  
24  
25  
26  
27  
28  
29  
30  
31  
32  
33  
34  
35  
36  
37  
38  
39  
40  
41 **Patient and Public involvement** None involved.

## 42 43 44 45 46 **RESULTS**

47  
48 Our search identified 57,822 citations remaining after exclusion of duplicates. Although,  
49 not all of these records will fulfil the inclusion criteria, such as e.g. being designed as a  
50 systematic review, we assigned them as potential review group. For the screening step, the  
51 counts of the articles that needed to be screened to reach the final set of studies are depicted in  
52 Figure 1.[22-141] The excluded studies are presented in Supplementary Table S1.

[insert Figure 1 here]

**Table 1**

**Characteristics of included reviews by review type**

|                                                                                         | <b>Cochrane<br/>SR (%)</b> | <b>Non-Cochrane<br/>SR (%)</b> | <b>RR (%)</b> | <b>CRD RR<br/>(%)</b> | <b>Total (%)</b> |
|-----------------------------------------------------------------------------------------|----------------------------|--------------------------------|---------------|-----------------------|------------------|
| <b>Random sample<br/>(% of total per group)</b>                                         | 30 (6)                     | 30 (0.1)                       | 30 (14)       | 30 (32)               | 120 (0.2)        |
| <b>Geographic location<br/>of the corresponding<br/>author<br/>(% of random sample)</b> |                            |                                |               |                       |                  |
| Africa                                                                                  | 2 (7)                      | 0                              | 0             | 0                     | 2 (2)            |
| Asia                                                                                    | 5 (17)                     | 3 (10)                         | 1 (3)         | 0                     | 9 (8)            |
| Australia                                                                               | 3 (10)                     | 5 (17)                         | 2 (7)         | 0                     | 10 (8)           |
| Europe                                                                                  | 11 (37)                    | 13 (43)                        | 13 (43)       | 2 (7)                 | 39 (33)          |
| North America                                                                           | 7 (23)                     | 8 (27)                         | 14 (47)       | 28 (93)               | 57 (48)          |
| South America                                                                           | 2 (7)                      | 1 (3)                          | 0             | 0                     | 3 (3)            |
| <b>Thematic focus</b>                                                                   |                            |                                |               |                       |                  |
| Prevention                                                                              | 11 (37)                    | 5 (17)                         | 4 (13)        | 7 (23)                | 27 (23)          |
| Treatment                                                                               | 18 (60)                    | 14 (47)                        | 15 (50)       | 16 (53)               | 63 (53)          |
| Health system                                                                           | 1 (3)                      | 2 (7)                          | 7 (23)        | 7 (23)                | 17 (14)          |
| Community-based <sup>1</sup>                                                            | 0                          | 9 (30)                         | 4 (13)        | 0                     | 13 (11)          |
| <b>Funding</b>                                                                          |                            |                                |               |                       |                  |
| Governmental,<br>institutional or WHO                                                   | 30 (100)                   | 30 (100)                       | 30 (100)      | 30 (100)              | 120 (100)        |
| Additional funding by                                                                   | 0                          | 0                              | 1 (3)         | 0                     | 1 (1)            |

|                                   |            |           |           |           |           |
|-----------------------------------|------------|-----------|-----------|-----------|-----------|
| company                           |            |           |           |           |           |
| <b>Conflict of interest (COI)</b> |            |           |           |           |           |
| Declared none                     | 21 (70)    | 15 (50)   | 19 (63)   | 29 (97)   | 84 (70)   |
| COI declared                      | 9 (30)     | 3 (10)    | 3 (10)    | 0         | 15 (13)   |
| Unmentioned                       | 0          | 12 (40)   | 8 (27)    | 1 (3)     | 21 (18)   |
| <b>Study protocol</b>             |            |           |           |           |           |
| Yes, mentioned in article         | 30 (100)   | 5 (17)    | 4 (13)    | 1 (3)     | 40 (33)   |
| Yes, mentioned in correspondence  | 0          | 8 (27)    | 9 (30)    | 0         | 17 (14)   |
| No, confirmed by correspondence   | 0          | 2 (7)     | 4 (13)    | 0         | 6 (5)     |
| Unmentioned                       | 0          | 15 (50)   | 13 (43)   | 29 (97)   | 57 (48)   |
| <b>AMSTAR rating</b>              |            |           |           |           |           |
| Median (range)                    | 11 (7, 11) | 7 (3, 11) | 4 (2, 10) | 8 (5, 11) | 8 (2, 11) |

With exclusion of treatment or preventive interventions

AMSTAR: measurement tool for the "assessment of the methodological quality of systematic reviews", not applicable questions were not counted. Higher AMSTAR scores indicate higher quality.

SR: systematic review; RR: rapid review; CRD: databases of the University of York, Center for Reviews and Dissemination; WHO: World Health Organisation.

Table 1 presents the characteristics of the included studies. Cochrane systematic reviews generally focused on the prevention and treatment of specific conditions, whereas 30% of non-Cochrane systematic reviews were categorized with a community-based topic, with a wide range of participants and possible outcomes and a broader range of study settings. Of note, 23% of each, rapid reviews and CRD rapid reviews, were categorized as health system

1  
2  
3 intervention, because they focused on methodological questions or health quality research.

4  
5 We detected noticeable differences when comparing the median AMSTAR scores: Cochrane  
6  
7 systematic reviews and CRD rapid reviews showed higher median scores than non-Cochrane  
8  
9 systematic reviews and rapid reviews. Where available, we also collected existing AMSTAR  
10  
11 ratings from the “health evidence” or “health systems evidence” platforms. For 68% (13/19 study  
12  
13 ratings) we found a congruent classification as strong, moderate or weak, respectively  
14  
15 (Supplementary File S4). In non-Cochrane reviews information about methodological  
16  
17 specifications of included studies were often lacking. As an example, all 30 Cochrane  
18  
19 systematic reviews (100%) mentioned a pre-existing review protocol, whereas a high amount of  
20  
21 non-Cochrane systematic reviews (59%) and of rapid reviews (43%) did not clarify whether  
22  
23 there had been a protocol or not. Similarly, all 30 Cochrane systematic reviews and all but one  
24  
25 CRD rapid reviews (97%) included a conflict of interest statement, whereas 40% of non-  
26  
27 Cochrane systematic reviews and 27% of rapid reviews lacked such a paragraph. All reviews  
28  
29 were funded by national or international governmental or institutional sources. Only one rapid  
30  
31 review reported the acceptance of additional funding from a pharmaceutical company.  
32  
33 Characteristics of the study population by type of included review are presented in the  
34  
35 Supplementary Table S2.  
36  
37  
38  
39  
40  
41  
42  
43  
44  
45  
46  
47  
48  
49  
50  
51  
52  
53  
54  
55  
56  
57  
58  
59  
60

**Table 2****General characteristics of stakeholder involvement (SI) by review type**

|                                                                          | <b>Cochrane<br/>SR (%)<br/>(n=30)</b> | <b>Non-<br/>Cochrane<br/>SR (%)<br/>(n=30)</b> | <b>RR (%)<br/>(n=30)</b> | <b>CRD RR (%)<br/>(n=30)</b> | <b>Total (%)<br/>(N=120)</b> |
|--------------------------------------------------------------------------|---------------------------------------|------------------------------------------------|--------------------------|------------------------------|------------------------------|
| SI mentioned in article                                                  | 2 (7)                                 | 2 (7)                                          | 6 (20)                   | 28 (93)                      | 38 (32)                      |
| SI only mentioned in<br>correspondence                                   | 2 (7)                                 | 4 (13)                                         | 7 (23)                   | 0                            | 13 (11)                      |
| <b>Total SI</b>                                                          | <b>4 (13)</b>                         | <b>6 (20)</b>                                  | <b>13 (43)</b>           | <b>28 (93)</b>               | <b>51 (43)</b>               |
| <b>SI per year</b>                                                       |                                       |                                                |                          |                              |                              |
| 2011                                                                     | 0/5 (0)                               | 0/1 (0)                                        | 0/3 (0)                  | 0/0 (0)                      | 0/9 (0)                      |
| 2012                                                                     | 3/7 (43)                              | 1/5 (20)                                       | 1/3 (33)                 | 0/0 (0)                      | 5/15 (33)                    |
| 2013                                                                     | 0/9 (0)                               | 0/6 (0)                                        | 3/5 (60)                 | 9/10 (90)                    | 12/30 (40)                   |
| 2014                                                                     | 1/7 (14)                              | 3/9 (30)                                       | 6/15 (40)                | 2/3 (67)                     | 12/34 (35)                   |
| 2015                                                                     | 0/2 (0)                               | 2/9 (22)                                       | 3/4 (75)                 | 17/17 (100)                  | 22/32 (69)                   |
| <b>Number of stakeholders<br/>involved per review (%<br/>of SI)</b>      |                                       |                                                |                          |                              |                              |
| 1                                                                        | 2 (50)                                | 2 (33)                                         | 2 (15)                   | 0                            | 6 (12)                       |
| 2-4                                                                      | 1 (25)                                | 1 (17)                                         | 4 (31)                   | 2 (7)                        | 8 (16)                       |
| >4                                                                       | 1 (25)                                | 3 (50)                                         | 4 (31)                   | 26 (93)                      | 34 (67)                      |
| Unspecified                                                              | 0                                     | 0                                              | 3 (23)                   | 0                            | 3 (6)                        |
| <b>Types of stakeholders<br/>(multiple roles possible)<br/>(% of SI)</b> |                                       |                                                |                          |                              |                              |
| Patients/consumers                                                       | 2 (50)                                | 0                                              | 2 (15)                   | 5 (18)                       | 9 (18)                       |

|                                                     |           |           |           |             |            |
|-----------------------------------------------------|-----------|-----------|-----------|-------------|------------|
| Professional organisations                          | 1 (25)    | 0         | 0         | 5 (18)      | 6 (12)     |
| Caregivers                                          | 2 (50)    | 0         | 3 (23)    | 23 (82)     | 28 (55)    |
| Researchers                                         | 1 (25)    | 3 (50)    | 2 (15)    | 0           | 6 (12)     |
| Policymakers                                        | 0         | 3 (50)    | 4 (31)    | 3 (11)      | 10 (20)    |
| Unspecified                                         | 0         | 0         | 2 (15)    | 4 (14)      | 6 (12)     |
| <b>Funding source (% of SI)</b>                     |           |           |           |             |            |
| Governmental or institutional funding               | 4 (100)   | 6 (100)   | 13 (100)  | 28 (100)    | 51 (100)   |
| Funding source involved as stakeholder              | 0         | 1 (17)    | 2 (15)    | 0           | 3 (6)      |
| <b>Thematic focus (% per review type per topic)</b> |           |           |           |             |            |
| Prevention                                          | 0/11 (0)  | 0/5 (0)   | 1/4 (25)  | 6/7 (86)    | 7/27 (26)  |
| Treatment                                           | 4/18 (22) | 3/14 (21) | 6/15 (40) | 16/16 (100) | 29/63 (46) |
| Health system                                       | 0/1 (0)   | 1/2 (50)  | 5/7 (71)  | 6/7 (86)    | 12/17 (71) |
| Community-based                                     | 0/0 (0)   | 2/9 (22)  | 1/4 (25)  | 0/0 (0)     | 3/13 (23)  |

CRD: databases of the University of York, Center for Reviews and Dissemination; SR:

systematic review; RR: rapid review; SI: stakeholder involvement

Any stakeholder involvement was mentioned in 13% of Cochrane systematic reviews, 20% of non-Cochrane systematic reviews, 43% of rapid reviews and 93% of CRD rapid reviews. Except for CRD rapid reviews, where the involvement of stakeholders was routinely reported in the methods or appendix section, about half of the stakeholder involvement was reported in the articles and the other half was confirmed via email by contact authors and remained unmentioned in the reviews. With 67% the email response rate was highest for rapid reviews. When comparing the amount of stakeholder involvement in different review topics, there were notable differences: The proportion of stakeholder involvement in reviews focusing on



prevention or treatment of specific conditions was lower than in those targeting health system interventions. Interestingly, the proportion of stakeholder involvement has been quite constant between the years 2012 (5/15, 33%) and 2014 (12/34, 34%) even though the amount of rapid reviews has increased substantially (Table 2). There was, however, a remarkable increase in the proportion of stakeholder involvement for the year 2015 (22/32, 69%), but this was mostly due to the fact that a majority of CRD rapid reviews, which presented the highest proportion of stakeholder involvement, was indexed in 2015.

CRD rapid reviews turned out to have by far the highest proportion of reported stakeholder involvement. The types of stakeholders engaged were listed in the appendix of 26/30 articles, but it was not specified what they had specifically contributed to the review, e.g. if their contribution had affected the final results and conclusions of the reviews (Table 3). One author mentioned in the review that the reason for involving stakeholders was to understand the clinical perspective.

**Table 3**

**Engagement characteristics of stakeholder involvement (SI) by review type**

|                                                          | <b>Cochrane<br/>SR (%)<br/>(n=30)</b> | <b>Non-<br/>Cochrane<br/>SR (%)<br/>(n=30)</b> | <b>RR (%)<br/>(n=30)</b> | <b>CRD RR (%)<br/>(n=30)</b> | <b>Total (%)<br/>(N=120)</b> |
|----------------------------------------------------------|---------------------------------------|------------------------------------------------|--------------------------|------------------------------|------------------------------|
| <b>Stages of SI (multiple stages possible) (% of SI)</b> |                                       |                                                |                          |                              |                              |
| Research question                                        | 1 (25)                                | 1 (17)                                         | 4 (31)                   | 0                            | 6 (12)                       |
| Study characteristics                                    | 0                                     | 0                                              | 6 (46)                   | 0                            | 6 (12)                       |
| Protocol writing                                         | 0                                     | 1 (17)                                         | 2 (15)                   | 0                            | 3 (6)                        |

|                                                                                     |        |        |         |          |         |
|-------------------------------------------------------------------------------------|--------|--------|---------|----------|---------|
| Review process                                                                      | 3 (75) | 1 (17) | 5 (38)  | 0        | 9 (18)  |
| Interpretation of findings                                                          | 0      | 1 (17) | 1 (8)   | 0        | 2 (4)   |
| Result synthesis                                                                    | 0      | 0      | 2 (15)  | 0        | 2 (4)   |
| Multiple or all stages                                                              | 1 (25) | 2 (33) | 1 (8)   | 28 (100) | 32 (63) |
| Unspecified                                                                         | 0      | 2 (33) | 1 (8)   | 0        | 3 (6)   |
| <b>Reasons mentioned for SI (% of SI)</b>                                           |        |        |         |          |         |
| Stakeholder commissioned / requested review                                         | 0      | 1 (17) | 4 (31)  | 0        | 5 (10)  |
| To get consumer feedback                                                            | 1 (25) | 0      | 0       | 0        | 1 (2)   |
| To refine research question                                                         | 1 (25) | 0      | 0       | 0        | 1 (2)   |
| To make the review more relevant for target audience                                | 2 (50) | 0      | 8 (62)  | 0        | 10 (20) |
| To understand clinical perspective                                                  | 0      | 1 (17) | 0       | 1 (4)    | 2 (4)   |
| Unspecified                                                                         | 0      | 4 (67) | 1 (7)   | 27 (96)  | 32 (63) |
| <b>Effect of SI mentioned by authors (% of SI)</b>                                  |        |        |         |          |         |
| Substantial or positive effect                                                      | 2 (50) | 4 (67) | 11 (85) | 0        | 17 (33) |
| Negative effect                                                                     | 0      | 0      | 0       | 0        | 0       |
| No effect mentioned                                                                 | 2 (50) | 2 (33) | 2 (15)  | 28 (100) | 34 (67) |
| Explicit encouragement for involving stakeholders in further studies (% of reviews) | 0      | 1 (3)  | 1 (3)   | 1 (3)    | 3 (2)   |

CRD: databases of the University of York, Center for Reviews and Dissemination; SR:

systematic review; RR: rapid review; SI: stakeholder involvement

1  
2  
3  
4  
5 We detected stakeholder involvement in 43% (13/30) of rapid reviews. In contrast to  
6  
7 CRD rapid reviews, there was usually a small number of stakeholders engaged. They were  
8  
9 involved at different phases, such as determining study characteristics, formulating the research  
10  
11 question, within the review process in general, and less commonly in protocol writing, result  
12  
13 synthesis and the interpretation of findings. One article involved stakeholder throughout all  
14  
15 stages, in one case the phase of involvement was not specified. In total, 85% of the authors  
16  
17 confirmed, that the stakeholders had significantly contributed to the review. Of these, 62%  
18  
19 mentioned that involving stakeholders led to an increased impact of the review and enabled to  
20  
21 focus on the needs of target groups, which made the review more relevant to e.g. patients or  
22  
23 policymakers. Stakeholders had commissioned one third of the rapid reviews or had asked for  
24  
25 evidence. Only two of 13 authors (15%) did not mention any substantial effect. In two cases one  
26  
27 of the funding sources was involved as stakeholder.  
28  
29  
30  
31

32 We identified stakeholder involvement in 20% (6/30) of non-Cochrane systematic  
33  
34 reviews. In four cases the stakeholder involvement was confirmed via email, two articles  
35  
36 mentioned the involvement of stakeholders. Only two types of stakeholders were reported:  
37  
38 policymakers and researchers. If mentioned, all phases of involvement occurred about equally.  
39  
40 A total 67% (4/6) study authors reported significant benefit from the stakeholders' contributions.  
41  
42 One author mentioned that stakeholder supported the researchers to understand different  
43  
44 perspectives of the problem, and 33% (2/6) reported no effect. In one case, the stakeholder was  
45  
46 involved as funding source.  
47  
48  
49  
50

51 Cochrane systematic reviews turned out to be the group with the smallest amount of  
52  
53 stakeholder involvement. All stakeholder engagement was confirmed and specified by email.  
54  
55 The types of stakeholders engaged were patients, caregivers, professional organisations and  
56  
57 researchers. They were mostly involved for providing feedback during the review process, in  
58  
59 one case they contributed in formulating the review question. One review involved stakeholders  
60

1  
2  
3 at all stages. A total of 50% (2/4) of the authors reported substantial benefit, the other 50% (2/4)  
4 reported no significant effect on study results or conclusions. Two authors had involved  
5 stakeholders to make the review more relevant for its target audience, one author claimed that  
6 stakeholders helped him to refine the research question. One author involved stakeholders to  
7 get direct consumer feedback before publishing the review. No stakeholders were involved in  
8 funding.  
9  
10  
11  
12  
13  
14  
15  
16  
17

## 18 **DISCUSSION**

19  
20 The involvement of stakeholders varies by review type. Our findings suggest that rapid  
21 reviews tend to involve stakeholders more than twice as frequently than systematic reviews. On  
22 average, they also involved a greater number of stakeholders per review. In addition, we  
23 detected considerable differences in the phases in which stakeholders were involved. Rapid  
24 reviews involved them at very early stages of the review process, such as determining the  
25 intentional study characteristics or formulating the research question. Furthermore, it seemed to  
26 be much more common for policymakers, who were the most frequent group of stakeholders  
27 involved in rapid reviews, or other stakeholder groups, to substantially contribute to rapid  
28 reviews than to systematic reviews.  
29  
30  
31  
32  
33  
34  
35  
36  
37  
38

39 Of note, the majority of rapid and non-Cochrane systematic review authors reported that  
40 the involved stakeholders had positive and considerable effects on the study results, making the  
41 review more relevant for the targeted audience. However, the minority of rapid and non-  
42 Cochrane systematic review authors reporting no effect of stakeholder involvement on the  
43 review process, may illustrate that the stakeholders' contribution to non-Cochrane systematic  
44 reviews was seen as an additional and welcomed feature to the review, but not as a substantial  
45 part. This shows the importance that within and between review types an information and  
46 experiences exchange between researchers could benefit the stakeholder engagement.  
47  
48  
49  
50  
51  
52  
53  
54  
55  
56  
57

58 A strength of this study is to provide an overview with its rather low amount of  
59  
60

1  
2  
3 stakeholder engagement in the assessed review types despite known benefits regarding the  
4 use of evidence in policy and practice. With respect to the different procedures used by review  
5 types, the reported experiences of stakeholder engagement, e.g. in rapid reviews, could further  
6 benefit and facilitate stakeholder engagement in other review types, for example in systematic  
7 reviews.  
8  
9  
10  
11  
12

13  
14 One limitation of this study is the low response rate to our emails by contact authors.  
15 Given the fact that nearly half of our emails to study authors remained unanswered or could not  
16 be sent, the rate of unmentioned stakeholder involvement might still be higher than our numbers  
17 suggest. Of note, there was no considerable difference between systematic reviews and rapid  
18 reviews in the percentage of unmentioned stakeholder involvement.  
19  
20  
21  
22  
23

24 Although our search is not very recent this article highlights the current situation and  
25 there is a call for action. Of course, an updated assessment might be needed in the years  
26 following.  
27  
28  
29

30 Although when using a broad definition of the term “stakeholder” including everyone with  
31 a particular interest in the research topic (but who are not members of the primary research  
32 team), this term was not consistently used by contact authors. In their emails, some authors  
33 listed peer reviewers as stakeholders or one author erroneously mentioned members of the  
34 research team, who performed literature research and data extraction as stakeholders. In  
35 addition, interdisciplinary knowledge exchange is an important part of evidence-based research,  
36 but there is a difference whether experts from other fields were included as researchers in the  
37 study team or whether they were considered as stakeholders. We did not count any experts or  
38 peer reviewers as stakeholders, Furthermore, discussion is needed, whether the funding body  
39 of a review might contribute as a stakeholder and how a potentially associated conflict of  
40 interest could be avoided.  
41  
42  
43  
44  
45  
46  
47  
48  
49  
50  
51  
52  
53  
54  
55

56 The reported involvement of stakeholders corresponded with Cottrell et al. who  
57 mentioned that stakeholders might contribute to different study types and evidence  
58 phases.[142] Based upon, Keown et al.[143] concluded, that stakeholder involvement led to an  
59  
60

1  
2  
3 increased relevance and depth of review findings, more clarity in defining research questions,  
4 broader dissemination of their results and increased awareness of target groups. Although they  
5 mentioned that this engagement process required flexibility and might be resource- and time-  
6 intensive, they nevertheless concluded that involving stakeholders facilitated implementation  
7 and should be indispensable for future research.  
8  
9  
10  
11  
12  
13  
14  
15

16 Although the overall proportion of stakeholder involvement has not yet increased  
17 prominently in the past few years, there have still been considerable efforts in creating  
18 standardized procedures for involving stakeholders in evidence synthesis. Keown et al.  
19 identified five opportunities in the systematic review process, where potential stakeholders could  
20 be engaged on a regular base.[143] The CRD rapid reviews included were mainly performed by  
21 Health Quality Ontario (Canada) and routinely held expert panels, including physicians,  
22 caregivers and sometimes, consumer representatives and professional organisations. The fact  
23 that they included stakeholders on a regular basis might confirm, what Keown et al [143] had  
24 already suggested: the engagement of audience members interested in or affected by the  
25 investigated topic definitively resulted in more benefits than limitations. We, therefore, suggest  
26 that future researcher involve stakeholders more broadly in the process of evidence synthesis,  
27 to increase the relevance and acceptance of the knowledge transfer. One example of an  
28 organisation ensuring that stakeholders are involved in research is the James Lind Alliance  
29 (<http://www.jla.nihr.ac.uk>).  
30  
31  
32  
33  
34  
35  
36  
37  
38  
39  
40  
41  
42  
43  
44

45 In future, the reporting of stakeholder involvement should be improved and its effects  
46 better evaluated and communicated. Stakeholder engagement could also be included in  
47 reporting checklists of all review types.  
48  
49  
50  
51  
52  
53  
54  
55

## 56 **ACKNOWLEDGEMENT**

57  
58 We are indebted to Julia Kreis and Aline Flatz for reviewing the protocol and our thanks go to  
59 Sarah Haile for generating the random lists. Parts of this work have been presented at the  
60

1  
2  
3 Global Evidence Summit September 2017 in Cape Town, SA.  
4  
5  
6

7 **Contributors** All authors conceived and designed the study. JF collected and interpreted the  
8 data and essentially contributed to the writing of the manuscript. MP and MM supervised the  
9 overall research and critically revised the manuscript. All authors approved the final manuscript.  
10  
11

12 **Funding** This research received no specific grant from any funding agency in the public,  
13 commercial or not-for-profit sectors.  
14  
15

16 **Competing interests** None declared.  
17

18 **Patient consent** Not required.  
19

20 **Provenance and peer review** Not commissioned; externally peer reviewed.  
21  
22

23 **Data sharing statement** No additional data are available.  
24  
25  
26  
27  
28  
29

### 30 **Legend Figure 1**

#### 31 **Flow diagram of study selection.**

32  
33 CRD: Databases of the University of York, Center for Reviews and Dissemination; RR: rapid  
34 review; SR: systematic review  
35  
36  
37  
38  
39  
40  
41  
42  
43  
44  
45  
46  
47  
48  
49  
50  
51  
52  
53  
54  
55  
56  
57  
58  
59  
60



## REFERENCES

1. Khangura S, Konnyu K, Cushman R, Grimshaw J, Moher D. Evidence summaries: the evolution of a rapid review approach. *Syst Rev*. 2012;1:10. doi: 10.1186/2046-4053-1-10. PubMed PMID: 22587960; PubMed Central PMCID: PMC3351736.
2. Page MJ, Shamseer L, Altman DG, Tetzlaff J, Sampson M, Tricco AC, et al. Epidemiology and Reporting Characteristics of Systematic Reviews of Biomedical Research: A Cross-Sectional Study. *PLoS Med*. 2016;13(5):e1002028. doi: 10.1371/journal.pmed.1002028. PubMed PMID: 27218655; PubMed Central PMCID: PMC4878797.
3. Jadad AR, Cook DJ, Jones A, Klassen TP, Tugwell P, Moher M, et al. Methodology and reports of systematic reviews and meta-analyses - A comparison of COCHRANE reviews with articles published in paper-based journals. *Jama-Journal of the American Medical Association*. 1998;280(3):278-80. doi: DOI 10.1001/jama.280.3.278. PubMed PMID: WOS:000074706000026.
4. Hopewell S, Clarke M, Lefebvre C, Scherer R. Handsearching versus electronic searching to identify reports of randomized trials. *Cochrane Database Syst Rev*. 2007;(2):MR000001. doi: 10.1002/14651858.MR000001.pub2. PubMed PMID: 17443625.
5. Ganann R, Ciliska D, Thomas H. Expediting systematic reviews: methods and implications of rapid reviews. *Implement Sci*. 2010;5:56. doi: 10.1186/1748-5908-5-56. PubMed PMID: 20642853; PubMed Central PMCID: PMC2914085.
6. Watt A, Cameron A, Sturm L, Lathlean T, Babidge W, Blamey S, et al. Rapid versus full systematic reviews: validity in clinical practice? *ANZ J Surg*. 2008;78(11):1037-40. doi: 10.1111/j.1445-2197.2008.04730.x. PubMed PMID: 18959712.
7. Tricco AC, Antony J, Zarin W, Striffler L, Ghassemi M, Ivory J, et al. A scoping review of rapid review methods. *BMC Med*. 2015;13:224. doi: 10.1186/s12916-015-0465-6. PubMed PMID: 26377409; PubMed Central PMCID: PMC4574114.
8. Watt A, Cameron A, Sturm L, Lathlean T, Babidge W, Blamey S, et al. Rapid reviews versus full systematic reviews: an inventory of current methods and practice in health technology assessment. *Int J Technol Assess Health Care*. 2008;24(2):133-9. doi: 10.1017/S0266462308080185. PubMed PMID: 18400114.
9. Hailey DM. Health technology assessment in Canada: diversity and evolution. *Med J Aust*. 2007;187(5):286-8. PubMed PMID: 17767434.
10. Mallery C, Ganachari D, Fernandez J, Smeeding L, Robinson S, Moon M, et al. Innovative Methods in Stakeholder Engagement: An Environmental Scan. Rockville, MD: Agency for Healthcare Research and Quality; May 2012. <http://www.effectivehealthcare.ahrq.gov/index.cfm/tools-and-resources/how-to-get-involved-in-the-effective-health-care-program/>: 2012.
11. Concannon TW, Fuster M, Saunders T, Patel K, Wong JB, Leslie LK, et al. A systematic review of stakeholder engagement in comparative effectiveness and patient-centered outcomes research. *J Gen Intern Med*. 2014;29(12):1692-701. doi: 10.1007/s11606-014-2878-x. PubMed PMID: 24893581; PubMed Central PMCID: PMC4242886.
12. Boote J, Wong R, Booth A. 'Talking the talk or walking the walk?' A bibliometric review of the literature on public involvement in health research published between 1995 and 2009. *Health Expect*. 2015;18(1):44-57. doi: 10.1111/hex.12007. PubMed PMID: 23033933; PubMed Central PMCID: PMC45060762.
13. Kreis J, Puhan MA, Schunemann HJ, Dickersin K. Consumer involvement in systematic reviews of comparative effectiveness research. *Health Expect*. 2013;16(4):323-37. doi:

- 1  
2  
3 10.1111/j.1369-7625.2011.00722.x. PubMed PMID: 22390732; PubMed Central PMCID:  
4 PMCPMC5060681.  
5  
6 14. Morley RF, Norman G, Golder S, Griffith P. A systematic scoping review of the evidence  
7 for consumer involvement in organisations undertaking systematic reviews: focus on  
8 Cochrane. *Res Involv Engagem*. 2016;2:36. doi: 10.1186/s40900-016-0049-4. PubMed  
9 PMID: 29507770; PubMed Central PMCID: PMCPMC5831869.  
10  
11 15. Lohr KN, Steinwachs DM. Health services research: an evolving definition of the field.  
12 *Health Serv Res*. 2002;37(1):7-9. PubMed PMID: 11949927.  
13  
14 16. R Core Team. R: A language and environment for statistical computing. Vienna, Austria.  
15 URL <https://www.R-project.org/2018>.  
16  
17 17. Pollock A, Campbell P, Struthers C, Synnot A, Nunn J, Hill S, et al. Stakeholder involvement  
18 in systematic reviews: a protocol for a systematic review of methods, outcomes and  
19 effects. *Res Involv Engagem*. 2017;3:9. doi: 10.1186/s40900-017-0060-4. PubMed PMID:  
20 29062534; PubMed Central PMCID: PMCPMC5611627.  
21  
22 18. Shea BJ, Grimshaw JM, Wells GA, Boers M, Andersson N, Hamel C, et al. Development of  
23 AMSTAR: a measurement tool to assess the methodological quality of systematic reviews.  
24 *BMC Med Res Methodol*. 2007;7:10. doi: 10.1186/1471-2288-7-10. PubMed PMID:  
25 17302989; PubMed Central PMCID: PMCPMC1810543.  
26  
27 19. McMaster University Hamilton (Canada) Health Evidence 2016  
28 <http://www.healthevidence.org> Accessed 06.04.2016.  
29  
30 20. Mc Master Health Forum (McMaster University Hamilton (Canada)) Health Systems  
31 Evidence 2016 <https://www.healthsystemsevidence.org> Accessed 06.04.2016.  
32  
33 21. Moher D, Liberati A, Tetzlaff J, Altman DG, Grp P. Preferred Reporting Items for  
34 Systematic Reviews and Meta-Analyses: The PRISMA Statement. *Journal of Clinical  
35 Epidemiology*. 2009;62(10):1006-12. doi: 10.1016/j.jclinepi.2009.06.005. PubMed PMID:  
36 WOS:000270250500003.  
37  
38 22. Akl Elie A, Oxman Andrew D, Herrin J, Vist Gunn E, Terrenato I, Sperati F, et al. Framing of  
39 health information messages. *Cochrane Database of Systematic Reviews* [Internet]. 2011;  
40 (12). Available from:  
41 <http://onlinelibrary.wiley.com/doi/10.1002/14651858.CD006777.pub2/abstract>.  
42  
43 23. Bjelakovic G, Gluud Lise L, Nikolova D, Whitfield K, Krstic G, Wetterslev J, et al. Vitamin D  
44 supplementation for prevention of cancer in adults. *Cochrane Database of Systematic  
45 Reviews* [Internet]. 2014; (6). Available from:  
46 <http://onlinelibrary.wiley.com/doi/10.1002/14651858.CD007469.pub2/abstract>.  
47  
48 24. Carney T, Myers Bronwyn J, Louw J, Okwundu Charles I. Brief school-based interventions  
49 and behavioural outcomes for substance-using adolescents. *Cochrane Database of  
50 Systematic Reviews* [Internet]. 2014; (2). Available from:  
51 <http://onlinelibrary.wiley.com/doi/10.1002/14651858.CD008969.pub2/abstract>.  
52  
53 25. Chen W, Zhang Y, Li X, Yang G, Liu Jian P. Chinese herbal medicine for diabetic peripheral  
54 neuropathy. *Cochrane Database of Systematic Reviews* [Internet]. 2013; (10). Available  
55 from: <http://onlinelibrary.wiley.com/doi/10.1002/14651858.CD007796.pub3/abstract>.  
56  
57 26. Cheuk Daniel KL, Chiang Alan KS, Lee Tsz L, Chan Godfrey CF, Ha Shau Y. Vaccines for  
58 prophylaxis of viral infections in patients with hematological malignancies. *Cochrane  
59 Database of Systematic Reviews* [Internet]. 2011; (3). Available from:  
60 <http://onlinelibrary.wiley.com/doi/10.1002/14651858.CD006505.pub2/abstract>.  
27. Fede G, Germani G, Gluud C, Gurusamy Kurinchi S, Burroughs Andrew K. Propylthiouracil  
for alcoholic liver disease. *Cochrane Database of Systematic Reviews* [Internet]. 2011; (6).

- Available from:  
<http://onlinelibrary.wiley.com/doi/10.1002/14651858.CD002800.pub3/abstract>.
28. Fonner Virginia A, Denison J, Kennedy Caitlin E, O'Reilly K, Sweat M. Voluntary counseling and testing (VCT) for changing HIV-related risk behavior in developing countries. Cochrane Database of Systematic Reviews [Internet]. 2012; (9). Available from: <http://onlinelibrary.wiley.com/doi/10.1002/14651858.CD001224.pub4/abstract>.
  29. Garrison Scott R, Allan GM, Sekhon Ravneet K, Musini Vijaya M, Khan Karim M. Magnesium for skeletal muscle cramps. Cochrane Database of Systematic Reviews [Internet]. 2012; (9). Available from: <http://onlinelibrary.wiley.com/doi/10.1002/14651858.CD009402.pub2/abstract>.
  30. Jefferson T, Rivetti A, Di Pietrantonj C, Demicheli V, Ferroni E. Vaccines for preventing influenza in healthy children. Cochrane Database of Systematic Reviews [Internet]. 2012; (8). Available from: <http://onlinelibrary.wiley.com/doi/10.1002/14651858.CD004879.pub4/abstract>.
  31. Jin H, Leng Q, Li C. Dietary flavonoid for preventing colorectal neoplasms. Cochrane Database of Systematic Reviews [Internet]. 2012; (8). Available from: <http://onlinelibrary.wiley.com/doi/10.1002/14651858.CD009350.pub2/abstract>.
  32. Jorge Eliane C, Jorge Edson N, El Dib Regina P. Early light reduction for preventing retinopathy of prematurity in very low birth weight infants. Cochrane Database of Systematic Reviews [Internet]. 2013; (8). Available from: <http://onlinelibrary.wiley.com/doi/10.1002/14651858.CD000122.pub2/abstract>.
  33. Junker Anders E, Als-Nielsen B, Gluud C, Gluud Lise L. Dopamine agents for hepatic encephalopathy. Cochrane Database of Systematic Reviews [Internet]. 2014; (2). Available from: <http://onlinelibrary.wiley.com/doi/10.1002/14651858.CD003047.pub3/abstract>.
  34. Karmali Kunal N, Davies P, Taylor F, Beswick A, Martin N, Ebrahim S. Promoting patient uptake and adherence in cardiac rehabilitation. Cochrane Database of Systematic Reviews [Internet]. 2014; (6). Available from: <http://onlinelibrary.wiley.com/doi/10.1002/14651858.CD007131.pub3/abstract>.
  35. Kwong Joey SW, Lau Hoi Lam C, Yeung F, Chau Pui H. Yoga for secondary prevention of coronary heart disease. Cochrane Database of Systematic Reviews [Internet]. 2015; (7). Available from: <http://onlinelibrary.wiley.com/doi/10.1002/14651858.CD009506.pub4/abstract>.
  36. Lager Kate E, Mistri Amit K, Khunti K, Haunton Victoria J, Sett Aung K, Wilson Andrew D. Interventions for improving modifiable risk factor control in the secondary prevention of stroke. Cochrane Database of Systematic Reviews [Internet]. 2014; (5). Available from: <http://onlinelibrary.wiley.com/doi/10.1002/14651858.CD009103.pub2/abstract>.
  37. Martí-Carvajal Arturo J, Knight-Madden Jennifer M, Martínez-Zapata Maria J. Interventions for treating leg ulcers in people with sickle cell disease. Cochrane Database of Systematic Reviews [Internet]. 2014; (12). Available from: <http://onlinelibrary.wiley.com/doi/10.1002/14651858.CD008394.pub3/abstract>.
  38. Moi JH, Sriranganathan MK, Edwards CJ, Buchbinder R. Lifestyle interventions for acute gout. Cochrane Database Syst Rev. 2013;(11):CD010519. doi: 10.1002/14651858.CD010519.pub2. PubMed PMID: 24186771.
  39. Nava F, Ghilotti F, Maggi L, Hatemi G, Del Bianco A, Merlo C, et al. Biologics, colchicine, corticosteroids, immunosuppressants and interferon-alpha for Neuro-Behçet's Syndrome. Cochrane Database of Systematic Reviews [Internet]. 2014; (12). Available from:

- 1  
2  
3 <http://onlinelibrary.wiley.com/doi/10.1002/14651858.CD010729.pub2/abstract>.
- 4 40. Njei B, Kongnyuy Eugene J, Kumar S, Okwen Mbah P, Sankar Mari J, Mbuagbaw L. Optimal  
5 timing for antiretroviral therapy initiation in patients with HIV infection and concurrent  
6 cryptococcal meningitis. Cochrane Database of Systematic Reviews [Internet]. 2013; (2).  
7 Available from:  
8 <http://onlinelibrary.wiley.com/doi/10.1002/14651858.CD009012.pub2/abstract>.
- 9  
10 41. Okwundu Charles I, Nagpal S, Musekiwa A, Sinclair D. Home- or community-based  
11 programmes for treating malaria. Cochrane Database of Systematic Reviews [Internet].  
12 2013; (5). Available from:  
13 <http://onlinelibrary.wiley.com/doi/10.1002/14651858.CD009527.pub2/abstract>.
- 14 42. Olsen O, Clausen Jette A. Planned hospital birth versus planned home birth. Cochrane  
15 Database of Systematic Reviews [Internet]. 2012; (9). Available from:  
16 <http://onlinelibrary.wiley.com/doi/10.1002/14651858.CD000352.pub2/abstract>.
- 17 43. Overdeest Gijbert M, Jacobs W, Vleggeert-Lankamp C, Thomé C, Gunzburg R, Peul W.  
18 Effectiveness of posterior decompression techniques compared with conventional  
19 laminectomy for lumbar stenosis. Cochrane Database of Systematic Reviews [Internet].  
20 2015; (3). Available from:  
21 <http://onlinelibrary.wiley.com/doi/10.1002/14651858.CD010036.pub2/abstract>.
- 22 44. Peckham Emily J, Nelson EA, Greenhalgh J, Cooper K, Roberts ER, Agrawal A. Homeopathy  
23 for treatment of irritable bowel syndrome. Cochrane Database of Systematic Reviews  
24 [Internet]. 2013; (11). Available from:  
25 <http://onlinelibrary.wiley.com/doi/10.1002/14651858.CD009710.pub2/abstract>.
- 26 45. Rahimi-Movaghar A, Amin-Esmaili M, Hefazi M, Yousefi-Nooraie R. Pharmacological  
27 therapies for maintenance treatments of opium dependence. Cochrane Database of  
28 Systematic Reviews [Internet]. 2013; (1). Available from:  
29 <http://onlinelibrary.wiley.com/doi/10.1002/14651858.CD007775.pub2/abstract>.
- 30 46. Shields L, Zhou H, Pratt J, Taylor M, Hunter J, Pascoe E. Family-centred care for  
31 hospitalised children aged 0-12 years. Cochrane Database of Systematic Reviews  
32 [Internet]. 2012; (10). Available from:  
33 <http://onlinelibrary.wiley.com/doi/10.1002/14651858.CD004811.pub3/abstract>.
- 34 47. Smart Neil A, Marshall Belinda J, Daley M, Boulos E, Windus J, Baker N, et al. Low-fat diets  
35 for acquired hypercholesterolaemia. Cochrane Database of Systematic Reviews [Internet].  
36 2011; (2). Available from:  
37 <http://onlinelibrary.wiley.com/doi/10.1002/14651858.CD007957.pub2/abstract>.
- 38 48. Taylor F, Huffman Mark D, Macedo Ana F, Moore Theresa HM, Burke M, Davey Smith G,  
39 et al. Statins for the primary prevention of cardiovascular disease. Cochrane Database of  
40 Systematic Reviews [Internet]. 2013; (1). Available from:  
41 <http://onlinelibrary.wiley.com/doi/10.1002/14651858.CD004816.pub5/abstract>.
- 42 49. Taylor Matthew J, Rudkin L, Bullemor-Day P, Lubin J, Chukwujekwu C, Hawton K.  
43 Strategies for managing sexual dysfunction induced by antidepressant medication.  
44 Cochrane Database of Systematic Reviews [Internet]. 2013; (5). Available from:  
45 <http://onlinelibrary.wiley.com/doi/10.1002/14651858.CD003382.pub3/abstract>.
- 46 50. Tejani Aaron M, Wasdell M, Spiwak R, Rowell G, Nathwani S. Carnitine for fatigue in  
47 multiple sclerosis. Cochrane Database of Systematic Reviews [Internet]. 2012; (5).  
48 Available from:  
49 <http://onlinelibrary.wiley.com/doi/10.1002/14651858.CD007280.pub3/abstract>.
- 50 51. Thomas Roger E, Lorenzetti D, Spragins W. Mentoring adolescents to prevent drug and  
51



- 1  
2  
3 alcohol use. Cochrane Database of Systematic Reviews [Internet]. 2011; (11). Available  
4 from: <http://onlinelibrary.wiley.com/doi/10.1002/14651858.CD007381.pub2/abstract>.
52. Agarwal R, Goldenberg M, Perry R, IsHak WW. The quality of life of adults with attention  
6 deficit hyperactivity disorder: a systematic review. *Innov Clin Neurosci*. 2012;9(5-6):10-21.  
7 PubMed PMID: 22808445; PubMed Central PMCID: PMCPMC3398685.
- 8 53. Ahmed AA, Alsharief E, Alsharief A. Intensive versus conventional glycemic control: What  
9 is best for patients with type 2 diabetes? *Diabetes and Metabolic Syndrome: Clinical*  
10 *Research and Reviews*. 2013;7(1):48-51.
- 11 54. Albrecht B, Staiger PK, Hall K, Miller P, Best D, Lubman DI. Benzodiazepine use and  
12 aggressive behaviour: A systematic review. *Australian and New Zealand Journal of*  
13 *Psychiatry*. 2014;48(12):1096-114.
- 14 55. Bak A, Browne J, Loveday HP, Tsiami A. Systematic review of nutritional interventions to  
15 prevent healthcare-associated infections in undernourished elderly. *Proceedings of the*  
16 *Nutrition Society*. 2013;72:E212.
- 17 56. Blasco MA, Redleaf MI. Cochlear implantation in unilateral sudden deafness improves  
18 tinnitus and speech comprehension: meta-analysis and systematic review. *Otology &*  
19 *neurotology* : official publication of the American Otological Society, American  
20 *Neurotology Society [and] European Academy of Otology and Neurotology*.  
21 2014;35(8):1426-32.
- 22 57. Bourke L, Homer KE, Thaha MA, Steed L, Rosario DJ, Robb KA, et al. Interventions to  
23 improve exercise behaviour in sedentary people living with and beyond cancer: A  
24 systematic review. *British Journal of Cancer*. 2014;110(4):831-41.
- 25 58. Chien TJ, Liu CY, Chang YF, Fang CJ, Hsu CH. Acupuncture for treating aromatase inhibitor-  
26 related arthralgia in breast cancer: a systematic review and meta-analysis. *Journal of*  
27 *Alternative & Complementary Medicine*. 2015;21(5):251-60. PubMed PMID: 25915433.
- 28 59. Collins CE, Burrows TL, Bray J, Asher R, Young M, Morgan PJ. Effectiveness of parent-  
29 centred interventions for the prevention and treatment of childhood overweight and  
30 obesity in community settings: A systematic review. *JBIC Database of Systematic Reviews*  
31 *and Implementation Reports*. 2013;11(9):180-257.
- 32 60. Foersch M, Jacobs C, Wriedt S, Hechtner M, Wehrbein H. Effectiveness of maxillary  
33 protraction using facemask with or without maxillary expansion: a systematic review and  
34 meta-analysis. *Clinical Oral Investigations*. 2015;19(6):1181-92. doi: 10.1007/s00784-015-  
35 1478-4. PubMed PMID: 25982454.
- 36 61. Gibbs M, Winsper C, Marwaha S, Gilbert E, Broome M, Singh SP. Cannabis use and mania  
37 symptoms: A systematic review and meta-analysis. *European Psychiatry*. 2015;30:1128.
- 38 62. Guerin M, Grimmer K, Kumar S. Community services' involvement in the discharge of  
39 older adults from hospital into the community. *International Journal Of Integrated Care*.  
40 2013;13:e032-e. PubMed PMID: 24179455.
- 41 63. Hu MB, Xu H, Bai PD, Jiang HW, Ding Q. Obesity has multifaceted impact on biochemical  
42 recurrence of prostate cancer: A dose-response meta-analysis of 36,927 patients. *Medical*  
43 *Oncology*. 2014;31(2).
- 44 64. Johantgen M, Fountain L, Zangaro G, Newhouse R, Stanik-Hutt J, White K. Comparison of  
45 labor and delivery care provided by certified nurse-midwives and physicians: a systematic  
46 review, 1990 to 2008. *Womens Health Issues*. 2012;22(1):e73-81. PubMed PMID:  
47 21865056.
- 48 65. Lankhaar JA, de Vries WR, Jansen JA, Zelissen PM, Backx FJ. Impact of overt and  
49 subclinical hypothyroidism on exercise tolerance: a systematic review. *Research Quarterly*  
50  
51  
52  
53  
54  
55  
56  
57  
58  
59  
60

- 1  
2  
3 for Exercise & Sport. 2014;85(3):365-89. PubMed PMID: 25141089.
- 4 66. Llewellyn A, Simmonds M, Owen CG, Woolacott N. Childhood obesity as a predictor of  
5 morbidity in adulthood: a systematic review and meta-analysis. *Obesity Reviews: An*  
6 *Official Journal Of The International Association For The Study Of Obesity*. 2015. doi:  
7 10.1111/obr.12316. PubMed PMID: 26440472.
- 8 67. Maglione MA, Das L, Raaen L, Smith A, Chari R, Newberry S, et al. Safety of vaccines used  
9 for routine immunization of US children: A systematic review. *Pediatrics*.  
10 2014;134(2):325-37.
- 11 68. Matsuda A, Yamaoka K, Tango T, Matsuda T, Nishimoto H. Effectiveness of  
12 psychoeducational support on quality of life in early-stage breast cancer patients: a  
13 systematic review and meta-analysis of randomized controlled trials. *Quality of life*  
14 *research : an international journal of quality of life aspects of treatment, care and*  
15 *rehabilitation*. 2014;23(1):21-30.
- 16 69. Panagioti M, Gooding PA, Triantafyllou K, Tarrier N. Suicidality and posttraumatic stress  
17 disorder (PTSD) in adolescents: a systematic review and meta-analysis. *Social Psychiatry*  
18 *And Psychiatric Epidemiology*. 2015;50(4):525-37. doi: 10.1007/s00127-014-0978-x.  
19 PubMed PMID: 25398198.
- 20 70. Rodgers M, Asaria M, Walker S, McMillan D, Lucock M, Harden M, et al. The clinical  
21 effectiveness and cost-effectiveness of low-intensity psychological interventions for the  
22 secondary prevention of relapse after depression: A systematic review. *Health*  
23 *Technology Assessment*. 2012;16(28):1-129.
- 24 71. Rolka EJ, Silverman MJ. A systematic review of music and dyslexia. *Arts in Psychotherapy*.  
25 2015;46:24-32.
- 26 72. Rozet F, Bastide C, Beuzeboc P, Cormier L, Fromont G, Hennequin C, et al. Prise en charge  
27 des tumeurs de la prostate a faible risque evolutif. *Progres en Urologie*. 2015;25(1):1-10.  
28 PubMed PMID: 25454776.
- 29 73. Rush CJ, Campbell RT, Jhund PS, Connolly EC, Preiss D, Gardner RS, et al. Falling  
30 Cardiovascular Mortality in Heart Failure With Reduced Ejection Fraction and Implications  
31 for Clinical Trials. *JACC: Heart Failure*. 2015;3(8):603-14.
- 32 74. Scott IC, Tan R, Stahl D, Steer S, Lewis CM, Cope AP. The protective effect of alcohol on  
33 developing rheumatoid arthritis: A systematic review and meta-analysis. *Rheumatology*  
34 *(United Kingdom)*. 2013;52(5):856-67.
- 35 75. Siffredi V, Anderson V, Leventer RJ, Spencer-Smith MM. Neuropsychological profile of  
36 agenesis of the corpus callosum: A systematic review. *Developmental Neuropsychology*.  
37 2013;38(1):36-57.
- 38 76. Sipe TA, Finnie RKC, Knopf JA, Qu S, Reynolds JA, Thota AB, et al. Effects of mental health  
39 benefits legislation: A community guide systematic review. *American Journal of*  
40 *Preventive Medicine*. 2015;48(6):755-66.
- 41 77. Te Morenga L, Mallard S, Mann J. Dietary sugars and body weight: systematic review and  
42 meta-analyses of randomised controlled trials and cohort studies. *BMJ (Clinical Research*  
43 *Ed)*. 2012;346:e7492-e. doi: 10.1136/bmj.e7492. PubMed PMID: 23321486.
- 44 78. Tricco AC, Antony J, Khan PA, Ghassemi M, Hamid JS, Ashoor H, et al. Safety and  
45 effectiveness of dipeptidyl peptidase-4 inhibitors versus intermediate-acting insulin or  
46 placebo for patients with type 2 diabetes failing two oral antihyperglycaemic agents: a  
47 systematic review and network meta-analysis. *BMJ Open*. 2014;4(12):e005752. PubMed  
48 PMID: 25537781.
- 49 79. Vasconcellos F, Seabra A, Katzmarzyk PT, Kraemer-Aguiar LG, Bouskela E, Farinatti P.
- 50  
51  
52  
53  
54  
55  
56  
57  
58  
59  
60

- 1  
2  
3 Physical activity in overweight and obese adolescents: systematic review of the effects on  
4 physical fitness components and cardiovascular risk factors. *Sports medicine (Auckland,*  
5 *NZ)*. 2014;44(8):1139-52.  
6  
7 80. Wang Z. Age-dependent decline of association between obesity and mortality: A  
8 systematic review and meta-analysis. *Obesity Research and Clinical Practice*. 2015;9(1):1-  
9 11.  
10 81. Wu S, Cohen D, Shi Y, Pearson M, Sturm R. Economic analysis of physical activity  
11 interventions. *American Journal of Preventive Medicine*. 2011;40(2):149-58.  
12 82. Sedation and Anesthesia Options for Diagnostic Procedures: A Review of Clinical  
13 Effectiveness and Guidelines. 2015. PubMed PMID: 26180868.  
14 83. Attree P, French B, Milton B, Povall S, Whitehead M, Popay J. The experience of  
15 community engagement for individuals: a rapid review of evidence. *Health & Social Care*  
16 *In The Community*. 2011;19(3):250-60. doi: 10.1111/j.1365-2524.2010.00976.x. PubMed  
17 PMID: 21138495.  
18 84. Barry MM, D'Eath M, Sixsmith J. Interventions for improving population health literacy:  
19 insights from a rapid review of the evidence. *Journal Of Health Communication*.  
20 2013;18(12):1507-22. doi: 10.1080/10810730.2013.840699. PubMed PMID: 24298885.  
21 85. Beall RF, Baskerville N, Golfam M, Saeed S, Little J. Modes of delivery in preventive  
22 intervention studies: A rapid review. *European Journal of Clinical Investigation*.  
23 2014;44(7):688-96.  
24 86. Beck CR, Sokal R, Arunachalam N, Puleston R, Cichowska A, Kessel A, et al. Neuraminidase  
25 inhibitors for influenza: a review and public health perspective in the aftermath of the  
26 2009 pandemic. *Influenza And Other Respiratory Viruses*. 2013;7 Suppl 1:14-24. doi:  
27 10.1111/irv.12048. PubMed PMID: 23279893.  
28 87. Boyce T, Holmes A. Addressing Health Inequalities in the Delivery of the Human  
29 Papillomavirus Vaccination Programme: Examining the Role of the School Nurse. *PLoS*  
30 *ONE*. 2012;7(9).  
31 88. Brunton G, Paraskeva N, Caird J, Bird KS, Kavanagh J, Kwan I, et al. Psychosocial  
32 predictors, assessment, and outcomes of cosmetic procedures: a systematic rapid  
33 evidence assessment. *Aesthetic Plastic Surgery*. 2014;38(5):1030-40. doi:  
34 10.1007/s00266-014-0369-4. PubMed PMID: 24962402.  
35 89. Butow P, Price MA, Shaw JM, Turner J, Clayton JM, Grimison P, et al. Clinical pathway for  
36 the screening, assessment and management of anxiety and depression in adult cancer  
37 patients: Australian guidelines. *Psycho-Oncology*. 2015;24(9):987-1001.  
38 90. Costello RB, Lentino CV, Boyd CC, O'Connell ML, Crawford CC, Sprengel ML, et al. The  
39 effectiveness of melatonin for promoting healthy sleep: A rapid evidence assessment of  
40 the literature. *Nutrition Journal*. 2014:106.  
41 91. Crawford C, Lee C, Bingham J, Buckenmaier CC, Crawford P, Delgado R, et al. Sensory art  
42 therapies for the self-management of chronic pain symptoms. *Pain Medicine (United*  
43 *States)*. 2014;15(S1):S66-S75.  
44 92. Crawford C, Lee C, May T, Buckenmaier CC, Crawford P, Delgado R, et al. Physically  
45 oriented therapies for the self-management of chronic pain symptoms. *Pain Medicine*  
46 *(United States)*. 2014;15(S1):S54-S65.  
47 93. Dorresteyn PM, Ipenburg NA, Murphy KJ, Smit M, Van Vulpen JK, Wegner I, et al. Rapid  
48 systematic review of normal audiometry results as a predictor for benign paroxysmal  
49 positional vertigo. *Otolaryngology - Head and Neck Surgery (United States)*.  
50 2014;150(6):919-24.  
51  
52  
53  
54  
55  
56  
57  
58  
59  
60



- 1
  - 2
  - 3
  - 4
  - 5
  - 6
  - 7
  - 8
  - 9
  - 10
  - 11
  - 12
  - 13
  - 14
  - 15
  - 16
  - 17
  - 18
  - 19
  - 20
  - 21
  - 22
  - 23
  - 24
  - 25
  - 26
  - 27
  - 28
  - 29
  - 30
  - 31
  - 32
  - 33
  - 34
  - 35
  - 36
  - 37
  - 38
  - 39
  - 40
  - 41
  - 42
  - 43
  - 44
  - 45
  - 46
  - 47
  - 48
  - 49
  - 50
  - 51
  - 52
  - 53
  - 54
  - 55
  - 56
  - 57
  - 58
  - 59
  - 60
94. Geddes R, Frank J, Haw S. A rapid review of key strategies to improve the cognitive and social development of children in Scotland. *Health Policy (Amsterdam, Netherlands)*. 2011;101(1):20-8. doi: 10.1016/j.healthpol.2010.08.013. PubMed PMID: 20822824.
95. Hithersay R, Strydom A, Moulster G, Buszewicz M. Carer-led health interventions to monitor, promote and improve the health of adults with intellectual disabilities in the community: a systematic review. *Research In Developmental Disabilities*. 2014;35(4):887-907. doi: 10.1016/j.ridd.2014.01.010. PubMed PMID: 24495402.
96. Humphreys DK, Ogilvie D. Synthesising evidence for equity impacts of population-based physical activity interventions: A pilot study. *International Journal of Behavioral Nutrition and Physical Activity*. 2013;10.
97. Jiwa M, McManus A, Dadich A. Continuity of cancer care: Where do primary care practitioners fit in? *Cancer Forum*. 2013;37(1):31-4.
98. Kreindler SA, Cui Y, Metge CJ, Raynard M. Patient characteristics associated with longer emergency department stay: A rapid review. *Emergency Medicine Journal*. 2015.
99. Kwok E, Konnyu KJ, Skidmore B, Moher D. Effectiveness and safety of emergency department short-stay units: A rapid review. *Canadian Journal of Emergency Medicine*. 2012;14:S5-S6.
100. Lal S, Adair CE. E-mental health: A rapid review of the literature. *Psychiatric Services*. 2014;65(1):24-32.
101. Lee C, Crawford C, Schoemaker E, Buckenmaier CC, Crawford P, Delgado R, et al. Movement therapies for the self-management of chronic pain symptoms. *Pain Medicine (United States)*. 2014;15(S1):S40-S53.
102. Lee C, Crawford C, Swann S. Multimodal, integrative therapies for the self-management of chronic pain symptoms. *Pain Medicine (Malden, Mass)*. 2014;15 Suppl 1:S76-S85. doi: 10.1111/pme.12408. PubMed PMID: 24734863.
103. Mann R, Gilbody S. Validity of two case finding questions to detect postnatal depression: a review of diagnostic test accuracy. *Journal Of Affective Disorders*. 2011;133(3):388-97. doi: 10.1016/j.jad.2010.11.015. PubMed PMID: 21146230.
104. McMurrin M. Individual-level interventions for alcohol-related violence: a rapid evidence assessment. *Criminal Behaviour And Mental Health: CBMH*. 2012;22(1):14-28. doi: 10.1002/cbm.821. PubMed PMID: 21823184.
105. Menear M, Briand C. Implementing a continuum of evidence-based psychosocial interventions for people with severe mental illness: part 1-review of major initiatives and implementation strategies. *Canadian Journal Of Psychiatry Revue Canadienne De Psychiatrie*. 2014;59(4):178-86. PubMed PMID: 25007110.
106. Moe-Byrne T, Chambers D, Harden M, McDaid C. Behaviour change interventions to promote prescribing of generic drugs: a rapid evidence synthesis and systematic review. *BMJ Open*. 2014;4(5):e004623-e. doi: 10.1136/bmjopen-2013-004623. PubMed PMID: 24833683.
107. Muñoz K, Caballero A, White K. Effectiveness of questionnaires for screening hearing of school-age children: a comprehensive literature review. *International Journal Of Audiology*. 2014;53(12):910-4. doi: 10.3109/14992027.2014.943846. PubMed PMID: 25140604.
108. Ndumbe-Eyoh S, Moffatt H. Intersectoral action for health equity: a rapid systematic review. *BMC Public Health*. 2013;13:1056-. doi: 10.1186/1471-2458-13-1056. PubMed PMID: 24209299.
109. Saeed S, Golfam M, Beall RF, Ashbury FD, Palmer LJ, Little J. Effectiveness of individual-

- 1  
2  
3 focused interventions to prevent chronic disease. *European Journal Of Clinical*  
4 *Investigation*. 2014;44(9):883-91. doi: 10.1111/eci.12298. PubMed PMID: 25041535.
- 5  
6 110. Trivedy CR, Cooke MW. Unscheduled Return Visits (URV) in adults to the Emergency  
7 Department (ED): A rapid evidence assessment policy review. *Emergency Medicine*  
8 *Journal*. 2015;32(4):324-9.
- 9  
10 111. Yu J, Wang Y, Li Y, Li X, Li C, Shen JT. The Da Vinci surgical system: A rapid review of the  
11 clinical and economic evidence. *Value in Health*. 2014;17(7):A798.
- 12  
13 112. Aerobic exercise training in patients with heart failure: a rapid review (Structured  
14 abstract). *Health Technology Assessment Database* [Internet]. 2015; (3). Available from:  
15 <http://onlinelibrary.wiley.com/o/cochrane/clhta/articles/HTA-32015000505/frame.html>.
- 16  
17 113. Criteria for referral to home care: a rapid review (Structured abstract). *Health Technology*  
18 *Assessment Database* [Internet]. 2015; (3). Available from:  
19 <http://onlinelibrary.wiley.com/o/cochrane/clhta/articles/HTA-32015000501/frame.html>.
- 20  
21 114. Physical activity counselling: a rapid review (Structured abstract). *Health Technology*  
22 *Assessment Database* [Internet]. 2015; (3). Available from:  
23 <http://onlinelibrary.wiley.com/o/cochrane/clhta/articles/HTA-32015000508/frame.html>.
- 24  
25 115. Care coordination for postacute stroke, chronic obstructive pulmonary disease, and heart  
26 failure clients: an economic rapid review (Structured abstract). *Health Technology*  
27 *Assessment Database* [Internet]. 2015; (3). Available from:  
28 <http://onlinelibrary.wiley.com/o/cochrane/clhta/articles/HTA-32015000492/frame.html>.
- 29  
30 116. Sodium restriction in heart failure: a rapid review (Structured abstract). *Health*  
31 *Technology Assessment Database* [Internet]. 2015; (3). Available from:  
32 <http://onlinelibrary.wiley.com/o/cochrane/clhta/articles/HTA-32015000504/frame.html>.
- 33  
34 117. Cognitive-behavioural therapy for anxiety and depression in patients with chronic  
35 obstructive pulmonary disease (COPD): a rapid review (Structured abstract). *Health*  
36 *Technology Assessment Database* [Internet]. 2015; (3). Available from:  
37 <http://onlinelibrary.wiley.com/o/cochrane/clhta/articles/HTA-32015000486/frame.html>.
- 38  
39 118. Communication of discharge instructions: a rapid review (Structured abstract). *Health*  
40 *Technology Assessment Database* [Internet]. 2015; (3). Available from:  
41 <http://onlinelibrary.wiley.com/o/cochrane/clhta/articles/HTA-32015000500/frame.html>.
- 42  
43 119. Prophylactic antibiotics for individuals with Chronic Obstructive Pulmonary Disease  
44 (COPD): a rapid review (Structured abstract). *Health Technology Assessment Database*  
45 [Internet]. 2015; (3). Available from:  
46 <http://onlinelibrary.wiley.com/o/cochrane/clhta/articles/HTA-32015000489/frame.html>.
- 47  
48 120. Respiratory therapy services in home care for individuals with chronic obstructive  
49 pulmonary disease (COPD): a rapid review (Structured abstract). *Health Technology*  
50 *Assessment Database* [Internet]. 2015; (3). Available from:  
51 <http://onlinelibrary.wiley.com/o/cochrane/clhta/articles/HTA-32015000491/frame.html>.
- 52  
53 121. Exercise programs after pulmonary rehabilitation for patients with chronic obstructive  
54 pulmonary disease (COPD): a rapid review (Structured abstract). *Health Technology*  
55 *Assessment Database* [Internet]. 2015; (3). Available from:  
56 <http://onlinelibrary.wiley.com/o/cochrane/clhta/articles/HTA-32015000488/frame.html>.
- 57  
58 122. Baidoobonso S. Effect of supportive interventions on informal caregivers of people at the  
59 end of life: a rapid review (Structured abstract). *Health Technology Assessment Database*  
[Internet]. 2014; (3). Available from:  
<http://onlinelibrary.wiley.com/o/cochrane/clhta/articles/HTA-32015000095/frame.html>.
- 60  
123. Brenner S. Optimal timing to begin an active rehabilitation program after a hip fracture: a

- 1  
2  
3 rapid review (Structured abstract). Health Technology Assessment Database [Internet].  
4 2013; (3). Available from: [http://onlinelibrary.wiley.com/o/cochrane/clhta/articles/HTA-](http://onlinelibrary.wiley.com/o/cochrane/clhta/articles/HTA-32014001040/frame.html)  
5 [32014001040/frame.html](http://onlinelibrary.wiley.com/o/cochrane/clhta/articles/HTA-32014001040/frame.html).  
6
- 7 124. Brener S. Effectiveness and safety of thrombolytics for the treatment of ischemic stroke: a  
8 rapid review (Structured abstract). Health Technology Assessment Database [Internet].  
9 2013; (3). Available from: [http://onlinelibrary.wiley.com/o/cochrane/clhta/articles/HTA-](http://onlinelibrary.wiley.com/o/cochrane/clhta/articles/HTA-32014001030/frame.html)  
10 [32014001030/frame.html](http://onlinelibrary.wiley.com/o/cochrane/clhta/articles/HTA-32014001030/frame.html).  
11
- 12 125. Bungay H, Vella-Burrows T. The effects of participating in creative activities on the health  
13 and well-being of children and young people: a rapid review of the literature (Provisional  
14 abstract). Perspectives in Public Health [Internet]. 2013; 133(1):[44-52 pp.]. Available  
15 from: [http://onlinelibrary.wiley.com/o/cochrane/cldare/articles/DARE-](http://onlinelibrary.wiley.com/o/cochrane/cldare/articles/DARE-12013008651/frame.html)  
16 [12013008651/frame.html](http://onlinelibrary.wiley.com/o/cochrane/cldare/articles/DARE-12013008651/frame.html)  
17 <http://rsh.sagepub.com/content/133/1/44.full.pdf>.  
18
- 19 126. Ghazipura M. Optimal timing for antibiotic administration in patients with community-  
20 acquired pneumonia: a rapid review (Structured abstract). Health Technology Assessment  
21 Database [Internet]. 2013; (3). Available from:  
22 <http://onlinelibrary.wiley.com/o/cochrane/clhta/articles/HTA-32014001051/frame.html>.  
23
- 24 127. Ghazipura M. Community versus inpatient rehabilitation in hip fracture patients: a rapid  
25 review (Structured abstract). Health Technology Assessment Database [Internet]. 2013;  
26 (3). Available from: [http://onlinelibrary.wiley.com/o/cochrane/clhta/articles/HTA-](http://onlinelibrary.wiley.com/o/cochrane/clhta/articles/HTA-32014001045/frame.html)  
27 [32014001045/frame.html](http://onlinelibrary.wiley.com/o/cochrane/clhta/articles/HTA-32014001045/frame.html).  
28
- 29 128. Ghazipura M. Cardiovascular and aerobic exercise in postacute stroke patients: a rapid  
30 review (Structured abstract). Health Technology Assessment Database [Internet]. 2015;  
31 (3). Available from: [http://onlinelibrary.wiley.com/o/cochrane/clhta/articles/HTA-](http://onlinelibrary.wiley.com/o/cochrane/clhta/articles/HTA-32015000494/frame.html)  
32 [32015000494/frame.html](http://onlinelibrary.wiley.com/o/cochrane/clhta/articles/HTA-32015000494/frame.html).  
33
- 34 129. Ghazipura M. Home-based versus centre-based rehabilitation for community-dwelling  
35 postacute stroke patients: an economic rapid review (Structured abstract). Health  
36 Technology Assessment Database [Internet]. 2015; (3). Available from:  
37 <http://onlinelibrary.wiley.com/o/cochrane/clhta/articles/HTA-32015000493/frame.html>.  
38
- 39 130. Kabali C. Self-management and educational interventions in the postacute stroke  
40 population: a rapid review (Structured abstract). Health Technology Assessment Database  
41 [Internet]. 2015; (3). Available from:  
42 <http://onlinelibrary.wiley.com/o/cochrane/clhta/articles/HTA-32015000498/frame.html>.  
43
- 44 131. Lambrinos A. Preoperative consultation: a rapid review (Structured abstract). Health  
45 Technology Assessment Database [Internet]. 2014; (3). Available from:  
46 <http://onlinelibrary.wiley.com/o/cochrane/clhta/articles/HTA-32014001064/frame.html>.  
47
- 48 132. Lambrinos A. Medication reconciliation at discharge: a rapid review (Structured abstract).  
49 Health Technology Assessment Database [Internet]. 2015; (3). Available from:  
50 <http://onlinelibrary.wiley.com/o/cochrane/clhta/articles/HTA-32015000507/frame.html>.  
51
- 52 133. Lambrinos A. Home-based exercise programs in heart failure: a rapid review (Structured  
53 abstract). Health Technology Assessment Database [Internet]. 2015; (3). Available from:  
54 <http://onlinelibrary.wiley.com/o/cochrane/clhta/articles/HTA-32015000506/frame.html>.  
55
- 56 134. Ling D. Role of screening for respiratory syncytial virus or influenza and empirical antiviral  
57 treatment for patients with community-acquired pneumonia: a rapid review (Structured  
58 abstract). Health Technology Assessment Database [Internet]. 2013; (3). Available from:  
59 <http://onlinelibrary.wiley.com/o/cochrane/clhta/articles/HTA-32014001055/frame.html>.  
60
135. McCurdy BR. Inhospital physiotherapy for acute exacerbations of chronic obstructive

- 1  
2  
3 pulmonary disease (AECOPD): a rapid review (Structured abstract). Health Technology  
4 Assessment Database [Internet]. 2013; (3). Available from:  
5 <http://onlinelibrary.wiley.com/o/cochrane/clhta/articles/HTA-32014001027/frame.html>.  
6  
7 136. McCurdy BR. Action plans for individuals with chronic obstructive pulmonary disease  
8 (COPD): a rapid review (Structured abstract). Health Technology Assessment Database  
9 [Internet]. 2013; (3). Available from:  
10 <http://onlinelibrary.wiley.com/o/cochrane/clhta/articles/HTA-32014001026/frame.html>.  
11  
12 137. Miani C, Ball S, Pitchforth E, Exley J, King S, Roland M, et al. Organisational interventions  
13 to reduce length of stay in hospital: a rapid evidence assessment (Structured abstract).  
14 Health Technology Assessment Database [Internet]. 2014; (3). Available from:  
15 <http://onlinelibrary.wiley.com/o/cochrane/clhta/articles/HTA-32014001458/frame.html>.  
16  
17 138. Nikitovic M. Intensity of rehabilitation after hip fracture: a rapid review (Structured  
18 abstract). Health Technology Assessment Database [Internet]. 2013; (3). Available from:  
19 <http://onlinelibrary.wiley.com/o/cochrane/clhta/articles/HTA-32014001044/frame.html>.  
20  
21 139. Schaink A. The effectiveness of statins for primary prevention: a rapid review (Structured  
22 abstract). Health Technology Assessment Database [Internet]. 2013; (3). Available from:  
23 <http://onlinelibrary.wiley.com/o/cochrane/clhta/articles/HTA-32014001037/frame.html>.  
24  
25 140. Wang M. Airway clearance techniques for patients with stable chronic obstructive  
26 pulmonary disease (COPD): a rapid review (Structured abstract). Health Technology  
27 Assessment Database [Internet]. 2015; (3). Available from:  
28 <http://onlinelibrary.wiley.com/o/cochrane/clhta/articles/HTA-32015000487/frame.html>.  
29  
30 141. Wang M. Pulmonary rehabilitation in the home versus other settings for individuals with  
31 chronic obstructive pulmonary disease (COPD): a rapid review (Structured abstract).  
32 Health Technology Assessment Database [Internet]. 2015; (3). Available from:  
33 <http://onlinelibrary.wiley.com/o/cochrane/clhta/articles/HTA-32015000495/frame.html>.  
34  
35 142. Cottrell E, Whitlock E, Kato E, Uhl S, Belinson S, Chang C, et al. Defining the Benefits of  
36 Stakeholder Engagement in Systematic Reviews. AHRQ Methods for Effective Health Care.  
37 Rockville (MD)2014.  
38  
39 143. Keown K, Van Eerd D, Irvin E. Stakeholder engagement opportunities in systematic  
40 reviews: knowledge transfer for policy and practice. J Contin Educ Health Prof.  
41 2008;28(2):67-72. doi: 10.1002/chp.159. PubMed PMID: 18521874.  
42  
43  
44  
45  
46  
47  
48  
49  
50  
51  
52  
53  
54  
55  
56  
57  
58  
59  
60

## Supplementary files

**File S1. Study protocol**

**File S2. PRISMA checklist**

**File S3a. Search strategy for systematic reviews in EBSCO Medline**

**File S3b. Search strategy for rapid reviews in Embase**

**File S4. Data extraction file: AMSTAR ratings**

**File S5. Data extraction file: Study characteristics**

**Table S1. References of excluded studies**

**Table S2. Characteristics of the study population by type of included review**

1  
2  
3  
4  
5  
6  
7  
8  
9  
10  
11  
12  
13  
14  
15  
16  
17  
18  
19  
20  
21  
22  
23  
24  
25  
26  
27  
28  
29  
30  
31  
32  
33  
34  
35  
36  
37  
38  
39  
40  
41  
42  
43  
44  
45  
46  
47  
48  
49  
50  
51  
52  
53  
54  
55  
56  
57  
58  
59  
60

**Figure 1**

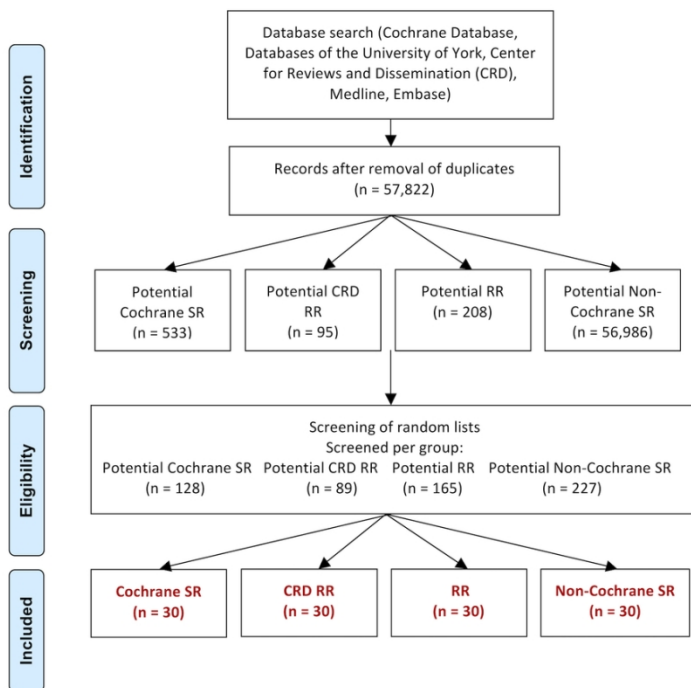

Flow diagram of study selection.

CRD: Databases of the University of York, Center for Reviews and Dissemination; RR: rapid review; SR: systematic review

98x128mm (300 x 300 DPI)



# Stakeholder involvement in systematic and rapid reviews of health services research

Protocol version 2

## 1. Background

### *Description of full systematic reviews (SR) and rapid reviews (RR)*

According to the Cochrane handbook (1), a traditional systematic review is a review that “attempts to collate all empirical evidence that fits pre-specified eligibility criteria in order to answer a specific research question. It uses explicit, systematic methods that are selected with a view to minimizing bias, thus providing more reliable findings from which conclusions can be drawn and decisions made”. While systematic reviews are considered to be the gold standard in knowledge synthesis, they are not without their limitations. For example, they usually require between 6 months and 2 years to complete and often focus on a narrow clinical question or set of questions. (2)

The key characteristics of a systematic review are (a) a clearly stated set of objectives with an explicit, reproducible methodology; (b) a systematic search that attempts to identify all studies that would meet the eligibility criteria; (c) an assessment of the validity of the findings of the included studies (e.g., assessment of risk of bias and confidence in cumulative estimates); and (d) systematic presentation, and synthesis, of the characteristics and findings of the included studies. (3) Systematic reviews should build on a protocol that describes the rationale, hypothesis, and planned methods of the review; few reviews report whether a protocol exists. Detailed, well-described protocols can facilitate the understanding and appraisal of the review methods, as well as the detection of modifications to methods and selective reporting in completed reviews (4).

Full systematic reviews (SR) and rapid reviews (RR) are two types of systematic reviews. They are often distinguished by the shorter time frame needed to produce a RR final report as well as by its less complex research topic (5): “Rapid reviews streamline traditional systematic review methods in order to synthesize evidence within a shortened timeframe” (6). As shown by Watt et al. RR did not have to be inherently inferior to SR despite “axiomatic differences” (7). He found that their conclusions did not differ much for similar research questions. However, SRs included methodologically more broader information, e.g. on economic evaluations or health service impact as well as more in-depth results, e.g. on clinical outcomes (8).

For SRs comprehensive guidance exists, e.g. based on the Cochrane Handbook (1). On the other hand, there is no standardized methodology for RRs and needs for at minimum increased transparency in reporting have been identified (5, 7).

R Rs were often considered to target specific policy questions or to be tailored to a mandate or to the intended end-users (7). Therefore, they are often performed to inform decision making or commissioned by health policy makers.

Description of format contents: PICO or according to PRISMA.



### ***Description of stakeholder involvement***

Stakeholders represent decision- and policy-makers and institutions responsible for the selection and implementation of health policies, HTAs, guidelines or end-users. Experts in the respective field are not considered as stakeholders except if they contribute in the policy-planning as described above. It is also known that stakeholders often represent more than one perspective. Concannon et al. described the 7Ps of stakeholders: patients and the public, providers, purchasers, payers, policy makers, product makers, principal investigators (9)

The U.S. EHC Program defined a “stakeholder” as a person or group with a vested interest in a particular clinical decision and the evidence that supports that decision, including:

- Patients, caregivers, and patient advocacy organizations
- Clinicians and their professional associations
- Institutional health care providers, such as hospital systems and medical clinics
- Government agencies
- Purchasers and payers, such as employers and public and private insurers
- Health care industry representatives
- Health care policymakers at the Federal, State and local levels
- Health care researchers and research institutions.

In general stakeholders might be engaged in evidence prioritization, e.g. proposing the title of a systematic review, setting research priorities, in evidence generation, such as performing trials and observational studies, in evidence synthesis, e.g. SR, RR, meta-analysis, in evidence integration, such as modeling, mapping gaps and evidence or cost effectiveness or in evidence dissemination and application, e.g. implementation formats or feedback assessment. Therefore, engagement of stakeholders may not only direct the targeted research topics but also influence the quality and dissemination of study results (9).

At what stages stakeholders can be involved in during the systematic review process? Cottrell et al. identified six categories where the systematic review might benefit: establishing credibility, anticipating controversy, ensuring transparency and accountability, improving relevance and enhancing quality as well as increasing dissemination and uptake of systematic review findings (10). Several challenges to involve stakeholders were determined. They include limited time and resources, skills of researcher to engage stakeholders, finding the right people, balancing multiple inputs and understanding the most appropriate time in the review process to engage different types of stakeholders (10). On the other hand, factors for successful stakeholder engagement included a-priori clarification of the expectations, the roles, types of activities, early engagement in the process, ongoing relationships to build trust and credibility, equality of different stakeholders, tentative inclusion of a trained facilitator and sensitivity to tight timelines (11).

Methods for identifying, selecting, contacting and engaging stakeholders might differ.

Furthermore, characteristics of stakeholders themselves are important, e.g. their intensity and modes of engagement may vary according to their interests and expectations, their roles and

1  
2  
3 their level of power and influence (11). To date there have been few efforts to measure the  
4 benefits/tradeoffs of specific stakeholder engagement processes or differing approaches to  
5 selecting and engaging differing stakeholder types (10-13).  
6  
7

8 Of all phases of the systematic review, the topic refinement and developing the key questions  
9 was repeatedly identified as the point where stakeholder engagement yielded the greatest  
10 benefit (10).  
11  
12  
13

### 14 ***Definition of health services research***

15 See Appendix 1.  
16  
17  
18

### 19 ***Relevance of this study***

20 Systematic reviews may benefit from involving stakeholders, but less is known about the  
21 practice, e.g. the proportion of involved stakeholders in recently published SRs and RRs and  
22 their type(s) and benefits of engagement in the process of a SR or RR. This information is  
23 considered to be relevant for the implementation and/or acceptance of SRs and RRs.  
24  
25  
26  
27  
28

## 29 **2. Objectives**

30 Our aims are to assess, reflect and compare the current international practice of involving  
31 stakeholders in published full systematic reviews (SR) and in rapid reviews (RR) in the field of  
32 health services research.  
33  
34  
35  
36

## 37 **3. Methods**

### 38 ***Sample size considerations***

39 Sample size considerations are guided by practical reasons and resources available. As the  
40 power of the two proportions is expected to be sufficiently high anyway, due to the big expected  
41 difference of the two proportions reporting stakeholder involvement. We consider a proportion  
42 of 0.70 for RRs and of 0.25 for SRs. This results in a minimal expected difference of 0.45.  
43  
44  
45  
46

47 Two groups with N=25 per group show an estimated power of 0.88 and an alpha of 0.023.

48 To account for potential subgroup analysis, we include a sample of N=30 systematic reviews per  
49 group, with 4 groups (SRs, RRs and Cochrane SRs, Cochrane additional database RRs). This  
50 allows us to include a maximum of six predictors in the analysis when we perform two-group  
51 comparisons.  
52  
53  
54

55 We will proceed according to the STROBE guidelines as far as they are applicable.  
56  
57  
58

### 59 ***Groups to be studied ("study population")***

60 *Full systematic reviews:*

Two groups will be studied:

1. Full systematic reviews in general: self-declaration as SR within the title or Methods section of the article or registration as such in the databases searched.
2. Cochrane systematic reviews: SRs are performed according to the Cochrane handbook (1). They are registered, supervised and released within a Cochrane Review Group. They represent the gold standard.

These two groups are selected as they are expected to differ with respect to their transparency of conduct and quality assessment.

#### *Rapid reviews:*

Rapid reviews articles will be identified on the basis of the respective self-declaration within the title, Methods section of the abstract or registration as such in the databases searched.

As there is heterogeneity regarding methodology, different terms might be used, e.g. rapid review, rapid method, rapid evidence, rapid synthesis or evidence summary.

#### *Inclusion criteria:*

- titled as systematic review or rapid review or reported as such in the objective or method section of the abstract, respectively, or registered as such in the database searched
- studies including rapid review methodology as one part of the overall study
- published between January, 2011 and December, 2015 (it is most crucial to be sure to include sufficient RRs)
- targeting a health services research topic as included in the title or abstract of the article based on the definition provided in Appendix 1

#### *Exclusion criteria:*

- designed to assess exclusively economic or cost analysis as described in the title or abstract
- performing a review or overview of reviews
- describing a protocol of a systematic review
- efficacy studies, clinical trials phases I to III, epidemiological studies to assess determinants or risk factors, economic analyses, non-human studies, establishment of databases or registries
- unclear design or description of the intervention

The inclusion and exclusion criteria are presented in Appendix 2.

#### ***Targeted stakeholders***

We will assess any kind of stakeholder involvement. In addition we will record the following groups of stakeholders:

- Institutional health care providers, such as hospitals and community services

- Government agencies
- Health care policymakers at the Federal, State and local levels

## 4. Outcomes

### *Primary outcomes:*

- to assess any kind of stakeholder involvement: yes or no
- to assess type(s) of stakeholders involved, e.g. decision- or policy-maker, experts involved in policy-planning, such as institutional health care providers or community services
- to determine phase(s)-related contribution(s) of stakeholders, e.g. developing the research question, literature search, study relevance (quality assessment), formulating or judging recommendations etc.

in recently published SRs and RRs.

### *Secondary outcomes:*

- to evaluate some potential predictors: type and topic of included studies, study population, setting (individual, population group, population, policy) and overall quality score
- to assess reported adverse effects or barriers of stakeholder involvement
- to verify stakeholder involvement
- to report publication issues, such as presence of a review protocol, institutional background of the authors, e.g. specialized in evidence synthesis, year of publication, stakeholder included as key word, dissemination information

## 5. Data collection

### *Databases to be searched:*

- The following databases will be searched:  
Biomedical/Health: Ovid Medline, Embase. Within the search strategy Cochrane SRs will be excluded.
- Cochrane library (for Cochrane SRs) and Cochrane additional databases (for RRs, e.g. DARE reviews, named as CD RR)

The search strategy will be presented in Appendix 1.

### *Selection of studies*

Following the searches in the targeted databases all results of the corresponding systematic review type (SR, RR, Cochrane SR, CD RR) will be pooled and duplicates excluded. These lists will be ordered randomly using the statistical program package R and will be exported to an excel file. The resulting lists will enter the study screening.

### ***Screening of studies***

In consecutive order, the randomly ordered references of each group of systematic reviews (SR, RR, Cochrane) will be checked for the general information and the inclusion and exclusion criteria (Appendix 2) until a total of 30 studies are included for each group.

One review authors (JF) will independently screen titles and abstracts for general information, inclusion and exclusion, cross-checked by MM. Inconsistencies or disagreement will be resolved through discussion and with consultation of another review author (MP) where necessary. The process of study selection will be carefully recorded in order to complete the PRISMA-flow diagram.

### ***Data extraction and management***

We will use a data collection form for study characteristics and outcome data which has been piloted on two reviews, one SR and one RR. One author, JF, performs full text extraction, supervised and spot-checked by a second researcher, MM. Within the full text article every step of the review will be checked for stakeholder involvement. We will resolve disagreements by consensus or by involving a third review author (MP).

Regarding Cochrane SRs, the protocol (and not the full text article) will be checked for stakeholder involvement as the protocol is relevant for performing the SR.

In addition to the screening form in Appendix 2 we will extract the following data:

- Institution performing the systematic review and contact details of the corresponding author
- Specific topic and intervention within the field of health services research
- Setting: population, population group, individual, policy; major characteristics of the population (overall N, age range or groups, sex)
- Funding for systematic review and notable conflicts of interest of authors
- Stakeholder involvement: any, number, type(s) and phase(s) of involvement, mentioned as key word
- Methodological quality assessment using the AMSTAR tool

All data will enter an Excel file.

To confirm the presented stakeholder involvement and to ask for reasons, whether benefits of stakeholder involvement were measured and about dissemination, the contact author of the included articles will be contacted by emails with pre-formulated questions. It will be indicated that this information will be used for a publication but only summarized and anonymously. Contact authors will be sent one reminder in case of missing responses.

If feasible, two experts in the field will be contacted to review and comment this protocol and to contribute to the final article in order to ensure generalizability and transparency.

We will conduct this study according to this protocol and report deviations from it in the 'Differences between protocol and review' section.

### Potential for bias conducting this overview

- selection bias, e.g. regarding year of publication, no search for grey literature
- reporting bias, e.g. incomplete reporting, no study protocol

## 6. Data analysis

There will be a narrative description of the synthesis.

We will assess the overall proportion of stakeholder involvement as well as within subgroups and according to the outcomes described. We will compare the proportion of stakeholders involved between groups using the non-parametric Wilcoxon rank sumtest.

The results of the AMSTAR assessment will be entered as a score.

### Differences between protocol and review

Will be listed if applicable.

### Conflicts of interest

None.

### Sources of support and funding

Involved authors: Jonas Feldmann (JF), Margot Mutsch (MM), Milo Alan Puhan (MP)

Internal sources

- Epidemiology, Biostatistics and Prevention Institute, University of Zurich, Zurich Switzerland

This is the host institution for the majority of the authors.

This work is part of the Master thesis of Jonas Feldmann.

## References

1. Higgins J, Green Se. Cochrane Handbook for Systematic Reviews of Interventions Version 5.1.0 [updated March 2011]. . Collaboration TC, editor. Available from <http://www.cochrane-handbook.org.2011>.
2. Khangura S, Konnyu K, Cushman R, Grimshaw J, Moher D. Evidence summaries: the evolution of a rapid review approach. *Syst Rev.* 2012;1:10.
3. Shamseer L, Moher D, Clarke M, Gherzi D, Liberati A, Petticrew M, et al. Preferred reporting items for systematic review and meta-analysis protocols (PRISMA-P) 2015: elaboration and explanation. *BMJ.* 2015;349:g7647.
4. Moher D, Shamseer L, Clarke M, Gherzi D, Liberati A, Petticrew M, et al. Preferred reporting items for systematic review and meta-analysis protocols (PRISMA-P) 2015 statement. *Syst Rev.* 2015;4:1.
5. Polisena J, Garritty C, Kamel C, Stevens A, Abou-Setta AM. Rapid review programs to support health care and policy decision making: a descriptive analysis of processes and methods. *Syst Rev.* 2015;4:26.
6. Ganann R, Ciliska D, Thomas H. Expediting systematic reviews: methods and implications of rapid reviews. *Implement Sci.* 2010;5:56.
7. Watt A, Cameron A, Sturm L, Lathlean T, Babidge W, Blamey S, et al. Rapid versus full systematic reviews: validity in clinical practice? *ANZ J Surg.* 2008;78(11):1037-40.
8. Watt A, Cameron A, Sturm L, Lathlean T, Babidge W, Blamey S, et al. Rapid reviews versus full systematic reviews: an inventory of current methods and practice in health technology assessment. *Int J Technol Assess Health Care.* 2008;24(2):133-9.
9. Concannon TW, Fuster M, Saunders T, Patel K, Wong JB, Leslie LK, et al. A systematic review of stakeholder engagement in comparative effectiveness and patient-centered outcomes research. *J Gen Intern Med.* 2014;29(12):1692-701.
10. Cottrell E, Whitlock E, Kato E, Uhl S, Belinson S, Chang C, et al. Defining the Benefits of Stakeholder Engagement in Systematic Reviews. *AHRQ Methods for Effective Health Care.* Rockville (MD)2014.
11. O'Haire C, McPheeters M, Nakamoto E, LaBrant L, Most C, Lee K, et al. Engaging Stakeholders To Identify and Prioritize Future Research Needs. *AHRQ Methods for Effective Health Care.* Rockville (MD)2011.
12. Keown K, Van Eerd D, Irvin E. Stakeholder engagement opportunities in systematic reviews: knowledge transfer for policy and practice. *J Contin Educ Health Prof.* 2008;28(2):67-72.
13. Kreis J, Puhan MA, Schunemann HJ, Dickersin K. Consumer involvement in systematic reviews of comparative effectiveness research. *Health Expect.* 2013;16(4):323-37.



## Appendix 1: Definition of health services research and search strategy (Ovid Medline)

### *Search strategy*

#### **Systematic reviews:**

- Cochrane Database: "systematic review" (title or abstract)
- Ovid Medline and Embase: "systematic review" (ti, ab), excluding "Cochrane" in title or abstract.
- No language restriction
- Published between January, 2011 and December, 2015

#### **Rapid reviews:**

- Terms: "rapid systematic review", "rapid review", "rapid evidence assessment" or "rapid health technology assessment" in title or abstract
- No language restriction
- Published between January, 2011 and December, 2015

### *Definition of health services research*

#### **No longer available:**

**Fields of health services research as defined by the Swiss Academy of Medical Sciences (SAMW)** (<http://www.samw.ch/de/Forschung/Versorgungsforschung/Kriterien.html>):

\*Adaptiert nach (Zugriff 28.11.11)

[www.bundesaerztekammer.de/page.asp?his=0.6.3289.3293.3295&all=true](http://www.bundesaerztekammer.de/page.asp?his=0.6.3289.3293.3295&all=true)

#### **Replaced by:**

Lohr KN, Steinwachs DM. Health services research: an evolving definition of the field. *Health Serv Res.* 2002;37(1):7-9. PubMed PMID: 11949927:

"Health services research is the multidisciplinary field of scientific investigation that studies how social factors, financing systems, organizational structures and processes, health technologies, and personal behaviors affect access to health care, the quality and cost of health care, and ultimately, our health and well-being. Its research domains are individuals, families, organizations, institutions, communities, and populations."

Health Technology Assessments (HTAs) targeting effectiveness as well as meta-analyses and systematic reviews for effectiveness and utility, pharmaceutical trials under everyday conditions, basic research in care-related fields, quality research, methodological developments in the field of health services research, the development and application of new technologies (e-health) and the implementation of knowledge into the clinical practice were included. We excluded studies that focused exclusively on economic or cost analyses, performed a narrative review, an overview of reviews or a protocol of a systematic review. Efficacy studies without assessing the quality of life, clinical efficacy trials phases I to III, epidemiological studies to assess determinants or risk factors, non-human studies, establishment of databases or registries, studies with unclear design or description of the intervention were also excluded.

## Appendix 2: Screening of general information and check for inclusion and exclusion

### General information

|                             |                |                      |
|-----------------------------|----------------|----------------------|
| Study ID:                   | Report ID:     | Data form completed: |
| First author:               | Year of study: | Version number:      |
| Citation:                   |                |                      |
| Publication type (specify): |                |                      |

### Inclusion and exclusion criteria

#### A) For full systematic reviews

| Inclusion criteria:                                                                                                                             | Criteria fulfilled?<br>Please tick. |    |
|-------------------------------------------------------------------------------------------------------------------------------------------------|-------------------------------------|----|
|                                                                                                                                                 | Yes                                 | No |
| Is the article titled as systematic review or designed as such in the method section of the abstract or registered as such within the database? |                                     |    |
| Is the article published (at least online) between January, 2010 and August, 2015?                                                              |                                     |    |
| Does the article investigate a health services research topic as defined by the SAMW and presented in the title or abstract?                    |                                     |    |
| Does the article assess an intervention to reduce a condition as presented in the title or abstract?                                            |                                     |    |

**To be included, all questions in the above table have to be answered with Yes.**

| Exclusion criteria:                                                                                                                                                                                                                                                                                  | Criteria fulfilled? |    |
|------------------------------------------------------------------------------------------------------------------------------------------------------------------------------------------------------------------------------------------------------------------------------------------------------|---------------------|----|
|                                                                                                                                                                                                                                                                                                      | Yes                 | No |
| Does the article investigate efficacy or describes clinical trials phases I to III, epidemiological studies to assess determinants or risk factors, non-human studies or the establishment of databases or registries as described in the title or the objective or methods section of the abstract? |                     |    |
| Does the article exclusively describe an economic assessment or cost analysis in the title or abstract?                                                                                                                                                                                              |                     |    |
| Does the article describe an overview or review of reviews within the title or abstract?                                                                                                                                                                                                             |                     |    |
| Does the article describe a protocol of a systematic review?                                                                                                                                                                                                                                         |                     |    |

|                                                           |  |  |
|-----------------------------------------------------------|--|--|
| Is the design or the intervention of the article unclear? |  |  |
|-----------------------------------------------------------|--|--|

**To be included, all questions in the above table have to be answered with No.**

### B) For rapid reviews

| Inclusion criteria:                                                                                                                                                         | Criteria fulfilled?<br>Please tick. |    |
|-----------------------------------------------------------------------------------------------------------------------------------------------------------------------------|-------------------------------------|----|
|                                                                                                                                                                             | Yes                                 | No |
| Is the article titled as rapid review, rapid method or rapid synthesis or designed as such in the method section of the abstract or registered as such within the database? |                                     |    |
| Is the article published (at least online) between January, 2010 and August, 2015?                                                                                          |                                     |    |
| Does the article investigate a health services research topic as defined by the SAMW and presented in the title or abstract?                                                |                                     |    |
| Does the article assess an intervention to reduce a condition as presented in the title or abstract?                                                                        |                                     |    |

**To be included, all questions in the above table have to be answered with Yes.**

The exclusion criteria are the same as described in A).

### C) For Cochrane systematic reviews

| Inclusion criteria:                                                                                                          | Criteria fulfilled?<br>Please tick. |    |
|------------------------------------------------------------------------------------------------------------------------------|-------------------------------------|----|
|                                                                                                                              | Yes                                 | No |
| Is the article registered and published as Cochrane systematic review within the Cochrane database?                          |                                     |    |
| Is the article published (at least online) between January, 2010 and August, 2015?                                           |                                     |    |
| Does the article investigate a health services research topic as defined by the SAMW and presented in the title or abstract? |                                     |    |
| Does the article assess an intervention to reduce a condition as presented in the title or abstract?                         |                                     |    |

**To be included, all questions in the above table have to be answered with Yes.**

The exclusion criteria are the same as described in A).

## Appendix 3: Data extraction for full text assessment

### Variables to be assessed (excel file):

- Study type (Cochrane SR, SR, RR, CD RR), Study ID, Report ID
- First study author, contact details of corresponding author, country, mail contact
- Reference citation
- Year of study (publication), version (update or first review)
- Initials of data extractor, initials of people who cross-checked extraction
- Study protocol mentioned, PRISMA checklist used
- Specific review topic, thematic focus, type of intervention, setting
- Study population: size, type, age range of participants included, sex
- Funding source, Conflict of interest statement
- Stakeholder involvement (SI): SI mentioned, SI as key word, number of stakeholders involved, types, stages involved, reasons for SI mentioned, effects of SI mentioned,
- Amstar rating, comparison of rating (Health evidence/health system evidence)

### AMSTAR – a measurement tool to assess the methodological quality of systematic reviews.

#### 1. Was an 'a priori' design provided?

The research question and inclusion criteria should be established before the conduct of the review.

*Note: Need to refer to a protocol, ethics approval, or pre-determined/a priori published research objectives to score a "yes."*

- Yes
- No
- Can't answer
- Not applicable

#### 2. Was there duplicate study selection and data extraction?

There should be at least two independent data extractors and a consensus procedure for disagreements should be in place.

*Note: 2 people do study selection, 2 people do data extraction, consensus process or one person checks the other's work.*

- Yes
- No
- Can't answer
- Not applicable

#### 3. Was a comprehensive literature search performed?

At least two electronic sources should be searched. The report must include years and databases used (e.g., Central, EMBASE, and MEDLINE). Key words and/or MESH terms must be stated and where feasible the search strategy should be provided. All searches should be supplemented by consulting current contents, reviews, textbooks, specialized registers, or experts in the particular field of study, and by reviewing the references in the studies found.

*Note: If at least 2 sources + one supplementary strategy used, select "yes" (Cochrane register/Central counts as 2 sources; a grey literature search counts as supplementary).*

- Yes
- No
- Can't answer
- Not applicable

#### 4. Was the status of publication (i.e. grey literature) used as an inclusion criterion?

The authors should state that they searched for reports regardless of their publication type. The authors should state whether or not they excluded any reports (from the systematic review), based on their publication status, language etc.

*Note: If review indicates that there was a search for "grey literature" or "unpublished literature," indicate "yes." SIGLE database, dissertations, conference proceedings, and*

trial registries are all considered grey for this purpose. If searching a source that contains both grey and non-grey, must specify that they were searching for grey/unpublished lit.

- Yes
- No
- Can't answer
- Not applicable

**5. Was a list of studies (included and excluded) provided?**

A list of included and excluded studies should be provided.

*Note: Acceptable if the excluded studies are referenced. If there is an electronic link to the list but the link is dead, select "no."*

- Yes
- No
- Can't answer
- Not applicable

**6. Were the characteristics of the included studies provided?**

In an aggregated form such as a table, data from the original studies should be provided on the participants, interventions and outcomes. The ranges of characteristics in all the studies analyzed e.g., age, race, sex, relevant socioeconomic data, disease status, duration, severity, or other diseases should be reported.

*Note: Acceptable if not in table format as long as they are described as above.*

- Yes
- No
- Can't answer
- Not applicable

**7. Was the scientific quality of the included studies assessed and documented?**

'A priori' methods of assessment should be provided (e.g., for effectiveness studies if the author(s) chose to include only randomized, double-blind, placebo controlled studies, or allocation concealment as inclusion criteria); for other types of studies alternative items will be relevant.

*Note: Can include use of a quality scoring tool or checklist, e.g., Jadad scale, risk of bias, sensitivity analysis, etc., or a description of quality items, with some kind of result for EACH study ("low" or "high" is fine, as long as it is clear which studies scored "low" and which scored "high"; a summary score/range for all studies is not acceptable).*

- Yes
- No
- Can't answer
- Not applicable

**8. Was the scientific quality of the included studies used appropriately in formulating conclusions?**

The results of the methodological rigor and scientific quality should be considered in the analysis and the conclusions of the review, and explicitly stated in formulating recommendations.

*Note: Might say something such as "the results should be interpreted with caution due to poor quality of included studies." Cannot score "yes" for this question if scored "no" for question 7.*

- Yes
- No
- Can't answer
- Not applicable

**9. Were the methods used to combine the findings of studies appropriate?**

For the pooled results, a test should be done to ensure the studies were combinable, to assess their homogeneity (i.e., Chi-squared test for homogeneity,  $I^2$ ). If heterogeneity exists a random effects model should be used and/or the clinical appropriateness of combining should be taken into consideration (i.e., is it sensible to combine?).

*Note: Indicate "yes" if they mention or describe heterogeneity, i.e., if they explain that they cannot pool because of heterogeneity/variability between interventions.*

- Yes
- No
- Can't answer
- Not applicable

**10. Was the likelihood of publication bias assessed?**

An assessment of publication bias should include a combination of graphical aids (e.g., funnel plot, other available tests) and/or statistical tests (e.g., Egger regression test, Hedges-Olken).

*Note: If no test values or funnel plot included, score "no". Score "yes" if mentions that*

1  
2  
3 *publication bias could not be assessed because there were fewer than 10 included*  
4 *studies.*

- 5  Yes  
6  No  
7  Can't answer  
8  Not applicable

9 **11. Was the conflict of interest included?**

10 Potential sources of support should be clearly acknowledged in both the systematic  
11 review and the included studies.

12 *Note: To get a "yes," must indicate source of funding or support for the systematic*  
13 *review AND for each of the included studies.*

- 14  Yes  
15  No  
16  Can't answer  
17  Not applicable

18 *Shea et al. BMC Medical Research Methodology 2007 7:10 doi:10.1186/1471-2288-7-10*  
19 *Additional notes (in italics) made by Michelle Weir, Julia Worswick, and Carolyn Wayne based on*  
20 *conversations with*

21 *Bev Shea and/or Jeremy Grimshaw in June and October 2008 and July and September 2010.*  
22  
23  
24  
25  
26  
27  
28  
29  
30  
31  
32  
33  
34  
35  
36  
37  
38  
39  
40  
41  
42  
43  
44  
45  
46  
47  
48  
49  
50  
51  
52  
53  
54  
55  
56  
57  
58  
59  
60

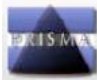

# PRISMA 2009 Checklist

For: **Characteristics of stakeholder involvement in systematic and rapid reviews:  
a methodological review in the area of health services research**

1  
2  
3  
4  
5  
6  
7  
8  
9  
10  
11  
12  
13  
14  
15  
16  
17  
18  
19  
20  
21  
22  
23  
24  
25  
26  
27  
28  
29  
30  
31  
32  
33  
34  
35  
36  
37  
38  
39  
40  
41  
42  
43  
44  
45  
46  
47

| Section/topic                      | #  | Checklist item                                                                                                                                                                                                                                                                                                                        | Reported on page #     |
|------------------------------------|----|---------------------------------------------------------------------------------------------------------------------------------------------------------------------------------------------------------------------------------------------------------------------------------------------------------------------------------------|------------------------|
| <b>TITLE</b>                       |    |                                                                                                                                                                                                                                                                                                                                       |                        |
| Title                              | 1  | Identify the report as a (systematic) <b>methodological</b> review, meta-analysis, or both.                                                                                                                                                                                                                                           | 1                      |
| <b>ABSTRACT</b>                    |    |                                                                                                                                                                                                                                                                                                                                       |                        |
| Structured summary                 | 2  | Provide a structured summary including, as applicable: background; objectives; data sources; study eligibility criteria, participants, and interventions; study appraisal and synthesis methods; results; limitations; conclusions and implications of key findings; systematic review registration number ( <b>not applicable</b> ). | 2                      |
| <b>INTRODUCTION</b>                |    |                                                                                                                                                                                                                                                                                                                                       |                        |
| Rationale                          | 3  | Describe the rationale for the review in the context of what is already known.                                                                                                                                                                                                                                                        | 5                      |
| Objectives                         | 4  | Provide an explicit statement of questions being addressed with reference to participants, interventions, comparisons, outcomes, and study design (PICOS). <b>Methodological assessment, no intervention</b>                                                                                                                          | 5-6                    |
| <b>METHODS</b>                     |    |                                                                                                                                                                                                                                                                                                                                       |                        |
| Protocol and registration          | 5  | Indicate if a review protocol exists, if and where it can be accessed (e.g., Web address), and, if available, provide registration information including registration number.                                                                                                                                                         | 6                      |
| Eligibility criteria               | 6  | Specify study characteristics (e.g., PICOS, length of follow-up) and report characteristics (e.g., years considered, language, publication status) used as criteria for eligibility, giving rationale.                                                                                                                                | 7-8                    |
| Information sources                | 7  | Describe all information sources (e.g., databases with dates of coverage, contact with study authors to identify additional studies) in the search and date last searched.                                                                                                                                                            | 6-7                    |
| Search                             | 8  | Present full electronic search strategy for at least one database, including any limits used, such that it could be repeated.                                                                                                                                                                                                         | Suppl. File S3a and 3b |
| Study selection                    | 9  | State the process for selecting studies (i.e., screening, eligibility, included in systematic review, and, if applicable, included in the meta-analysis).                                                                                                                                                                             | 7-8                    |
| Data collection process            | 10 | Describe method of data extraction from reports (e.g., piloted forms, independently, in duplicate) and any processes for obtaining and confirming data from investigators.                                                                                                                                                            | 7                      |
| Data items                         | 11 | List and define all variables for which data were sought (e.g., PICOS, funding sources) and any assumptions and simplifications made.                                                                                                                                                                                                 | 8-9                    |
| Risk of bias in individual studies | 12 | Describe methods used for assessing risk of bias of individual studies (including specification of whether this was done at the <b>Study or outcome level</b> ), and how this information is to be used in any data synthesis.                                                                                                        | n/a<br>AMSTAR for      |





# PRISMA 2009 Checklist

For: **Characteristics of stakeholder involvement in systematic and rapid reviews:  
a methodological review in the area of health services research**

|                      |    |                                                                                                                                                           |                                              |
|----------------------|----|-----------------------------------------------------------------------------------------------------------------------------------------------------------|----------------------------------------------|
|                      |    |                                                                                                                                                           | methodological quality                       |
| Summary measures     | 13 | State the principal summary measures (e.g., risk ratio, difference in means).                                                                             | Stakeholder involvement per review type in % |
| Synthesis of results | 14 | Describe the methods of handling data and combining results of studies, if done, including measures of consistency (e.g., $I^2$ ) for each meta-analysis. | No meta-analysis                             |

Page 1 of 2

| Section/topic                 | #  | Checklist item                                                                                                                                                                                                                                                      | Reported on page #                      |
|-------------------------------|----|---------------------------------------------------------------------------------------------------------------------------------------------------------------------------------------------------------------------------------------------------------------------|-----------------------------------------|
| Risk of bias across studies   | 15 | Specify any assessment of risk of bias that may affect the cumulative evidence (e.g., publication bias, selective reporting within studies).                                                                                                                        | Reporting bias 19                       |
| Additional analyses           | 16 | Describe methods of additional analyses (e.g., sensitivity or subgroup analyses, meta-regression), if done, indicating which were pre-specified.                                                                                                                    | Not applicable                          |
| <b>RESULTS</b>                |    |                                                                                                                                                                                                                                                                     |                                         |
| Study selection               | 17 | Give numbers of studies screened, assessed for eligibility, and included in the review, with reasons for exclusions at each stage, ideally with a flow diagram.                                                                                                     | Figure 1                                |
| Study characteristics         | 18 | For each study, present characteristics for which data were extracted (e.g., study size, PICOS, follow-up period) and provide the citations.                                                                                                                        | Supplementary File S4 (part, AMSTAR)    |
| Risk of bias within studies   | 19 | Present data on risk of bias of each study and, if available, any outcome level assessment (see item 12).                                                                                                                                                           | AMSTAR (methodological characteristics) |
| Results of individual studies | 20 | For all outcomes considered (benefits or harms), present, for each study: (a) simple summary data for each intervention group (b) effect estimates and confidence intervals, ideally with a forest plot.                                                            | Not applicable                          |
| Synthesis of results          | 21 | Present results of each meta-analysis done, including confidence intervals and measures of consistency.                                                                                                                                                             | Not applicable                          |
| Risk of bias across studies   | 22 | Present results of any assessment of risk of bias across studies (see Item 15).                                                                                                                                                                                     |                                         |
| Additional analysis           | 23 | Give results of additional analyses, if done (e.g., sensitivity or subgroup analyses, meta-regression [see Item 16]).<br>For peer review only - <a href="http://bmjopen.bmj.com/site/about/guidelines.xhtml">http://bmjopen.bmj.com/site/about/guidelines.xhtml</a> | Not applicable                          |

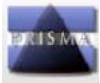

# PRISMA 2009 Checklist

1  
2  
3  
4  
5  
6  
7  
8  
9  
10  
11  
12  
13  
14  
15  
16  
17  
18  
19  
20  
21  
22  
23  
24  
25  
26  
27  
28  
29  
30  
31  
32  
33  
34  
35  
36  
37  
38  
39  
40  
41  
42  
43  
44  
45  
46  
47

For: **Characteristics of stakeholder involvement in systematic and rapid reviews:  
a methodological review in the area of health services research**

|                     |    |                                                                                                                                                                                      |       |
|---------------------|----|--------------------------------------------------------------------------------------------------------------------------------------------------------------------------------------|-------|
| <b>DISCUSSION</b>   |    |                                                                                                                                                                                      |       |
| Summary of evidence | 24 | Summarize the main findings including the strength of evidence for each main outcome; consider their relevance to key groups (e.g., healthcare providers, users, and policy makers). | 19-20 |
| Limitations         | 25 | Discuss limitations at study and outcome level (e.g., risk of bias), and at review-level (e.g., incomplete retrieval of identified research, reporting bias).                        | 19-22 |
| Conclusions         | 26 | Provide a general interpretation of the results in the context of other evidence, and implications for future research.                                                              | 23    |
| <b>FUNDING</b>      |    |                                                                                                                                                                                      |       |
| Funding             | 27 | Describe sources of funding for the systematic review and other support (e.g., supply of data); role of funders for the systematic review.                                           | 23    |

From: Moher D, Liberati A, Tetzlaff J, Altman DG, The PRISMA Group (2009). Preferred Reporting Items for Systematic Reviews and Meta-Analyses: The PRISMA Statement. PLoS Med 6(7): e1000097. doi:10.1371/journal.pmed1000097

For more information, visit: [www.prisma-statement.org](http://www.prisma-statement.org).



Thursday, October 22, 2015 6:29:28 AM

1  
2  
3  
4  
5  
6  
7  
8  
9  
10  
11  
12  
13  
14  
15  
16  
17  
18  
19  
20  
21  
22  
23  
24  
25  
26  
27  
28  
29  
30  
31  
32  
33  
34  
35  
36  
37  
38  
39  
40  
41  
42  
43  
44  
45  
46  
47  
48  
49  
50  
51  
52  
53  
54  
55  
56  
57  
58  
59  
60

| Query                                                                     | Limiters/Expanders                                                                                     | Last Run Via                                                                                            | Results |
|---------------------------------------------------------------------------|--------------------------------------------------------------------------------------------------------|---------------------------------------------------------------------------------------------------------|---------|
| AB "systematic review"<br>OR TI "systematic<br>review" NOT AB<br>cochrane | Limiters - Date of<br>Publication: 20110101-<br>20151231<br>Search modes - Find all<br>my search terms | Interface - EBSCOhost<br>Research Databases<br>Search Screen - Advanced<br>Search<br>Database - MEDLINE | 38,740  |
| AB "systematic review"<br>OR TI "systematic<br>review"                    | Limiters - Date of<br>Publication: 20110101-<br>20151231<br>Search modes - Find all<br>my search terms | Interface - EBSCOhost<br>Research Databases<br>Search Screen - Advanced<br>Search<br>Database - MEDLINE | 42,718  |

## Embase Session Results

| No. | Query                                                                                                                                                                                                                                                                                                                                     | Results |
|-----|-------------------------------------------------------------------------------------------------------------------------------------------------------------------------------------------------------------------------------------------------------------------------------------------------------------------------------------------|---------|
| #13 | 'rapid systematic review' OR 'rapid review' OR 'rapid evidence assessment' OR 'rapid health technology assessment' OR 'rapid assessment':ab,ti AND [2011-2015]/py                                                                                                                                                                         | 1,343   |
| #12 | 'rapid systematic review' OR 'rapid review' OR 'rapid evidence assessment' OR 'rapid health technology assessment':ab,ti AND [2011-2015]/py                                                                                                                                                                                               | 188     |
| #11 | 'rapid systematic review' OR 'rapid review' OR 'rapid evidence assessment' OR 'rapid health technology assessment' OR 'brief review':ab,ti AND [2011-2015]/py                                                                                                                                                                             | 3,710   |
| #10 | 'rapid systematic review' OR 'rapid review' OR 'rapid evidence assessment' OR 'rapid evidence' OR 'rapid health technology assessment' OR 'evidence brief' OR 'evidence summary' OR 'brief review':ab,ti AND [2011-2015]/py                                                                                                               | 3,801   |
| #9  | 'rapid assessment' OR 'rapid systematic review' OR 'rapid review' OR 'rapid evidence assessment' OR 'rapid evidence' OR 'rapid health technology assessment' OR 'evidence brief' OR 'evidence summary' OR 'brief review':ab,ti AND [2011-2015]/py                                                                                         | 4,977   |
| #8  | 'rapid assessment' OR 'rapid systematic review' OR 'rapid review' OR 'rapid evidence assessment' OR 'rapid evidence' OR 'rapid synthesis' OR 'rapid health technology assessment' OR 'evidence brief' OR 'evidence summary' OR 'brief review':ab,ti AND [2011-2015]/py                                                                    | 5,372   |
| #7  | 'rapid assessment' OR 'rapid systematic review' OR 'rapid review' OR 'rapid evidence assessment' OR 'rapid method' OR 'rapid evidence' OR 'rapid synthesis' OR 'rapid health technology assessment' OR 'evidence brief' OR 'evidence summary' OR 'brief review':ab,ti AND [2011-2015]/py                                                  | 7,285   |
| #6  | rapid AND (assessment OR 'systematic review'/exp OR 'systematic review' OR 'evidence assessment' OR 'health technology assessment' OR 'method'/exp OR method OR 'review'/exp OR review OR evidence OR 'synthesis'/exp OR synthesis) OR 'brief review' OR 'evidence brief' OR 'evidence summary':ab,ti AND [embase]/lim AND [2011-2015]/py | 143,957 |



© 2015 Reed Elsevier Properties SA. All rights reserved.

Embase is a registered trademark of Reed Elsevier Properties SA, used under license.

Tabelle1

### Characteristics of stakeholder involvement in systematic and rapid reviews: Data extraction: AMSTAR ratings

| Type<br>(SR, RR, ID<br>CRD<br>RR)  | Study<br>ID | Year of<br>study | Citation                                                                                                                                                                                                                                                        | AMSTAR assessment  |                                 |                                                                                                                                            |                                                                                                                                               |
|------------------------------------|-------------|------------------|-----------------------------------------------------------------------------------------------------------------------------------------------------------------------------------------------------------------------------------------------------------------|--------------------|---------------------------------|--------------------------------------------------------------------------------------------------------------------------------------------|-----------------------------------------------------------------------------------------------------------------------------------------------|
|                                    |             |                  |                                                                                                                                                                                                                                                                 | Review<br>protocol | A priori<br>design<br>provided? | Was there duplicate<br>study selection and<br>data extraction? (at<br>least two independent<br>data extractors and<br>consensus procedure) | Comprehensive<br>literature search<br>performed? (at least<br>two electronic sources,<br>reports must include<br>years and databases<br>used) |
| <b>Cochrane systematic reviews</b> |             |                  |                                                                                                                                                                                                                                                                 |                    |                                 |                                                                                                                                            |                                                                                                                                               |
| CSR                                | 101         | 2012             | Olsen O, Clausen JA. Planned hospital birth versus planned home birth. Cochrane Database of Systematic Reviews 2012, Issue 9. Art. No.: CD000352. DOI: 10.1002/14651858.CD000352.pub2.                                                                          | yes                | 1                               | 1                                                                                                                                          | 1                                                                                                                                             |
| CSR                                | 102         | 2013             | Moi JHY, Sriranganathan MK, Edwards CJ, Buchbinder R. Lifestyle interventions for acute gout. Cochrane Database of Systematic Reviews 2013, Issue 11. Art. No.: CD010519. DOI: 10.1002/14651858.CD010519.pub2.                                                  | yes                | 1                               | 1                                                                                                                                          | 1                                                                                                                                             |
| CSR                                | 103         | 2011             | Thomas RE, Lorenzetti D, Spragins W. Mentoring adolescents to prevent drug and alcohol use. Cochrane Database of Systematic Reviews 2011, Issue 11. Art. No.: CD007381. DOI: 10.1002/14651858.CD007381.pub2.                                                    | yes                | 1                               | 1                                                                                                                                          | 1                                                                                                                                             |
| CSR                                | 104         | 2012             | Garrison SR, Allan GM, Sekhon RK, Musini VM, Khan KM. Magnesium for skeletal muscle cramps. Cochrane Database of Systematic Reviews 2012, Issue 9. Art. No.: CD009402. DOI: 10.1002/14651858.CD009402.pub2.                                                     | yes                | 1                               | 1                                                                                                                                          | 1                                                                                                                                             |
| CSR                                | 105         | 2012             | Tejani AM, Wasdell M, Spiwak R, Rowell G, Nathwani S. Carnitine for fatigue in multiple sclerosis. Cochrane Database of Systematic Reviews 2012, Issue 5. Art. No.: CD007280. DOI: 10.1002/14651858.CD007280.pub3.                                              | yes                | 1                               | 1                                                                                                                                          | 1                                                                                                                                             |
| CSR                                | 106         | 2013             | Taylor F, Huffman MD, Macedo AF, Moore THM, Burke M, Davey Smith G, Ward K, Ebrahim S. Statins for the primary prevention of cardiovascular disease. Cochrane Database of Systematic Reviews 2013, Issue 1. Art. No.: CD004816. DOI: 10.1002/14651858.CD004816. | yes                | 1                               | 1                                                                                                                                          | 1                                                                                                                                             |
| CSR                                | 107         | 2013             | Jorge EC, Jorge EN, El Dib RP. Early light reduction for preventing retinopathy of prematurity in very low birth weight infants. Cochrane Database of Systematic Reviews 2013, Issue 8. Art. No.: CD000122. DOI: 10.1002/14651858.CD000122.pub2.                | yes                | 1                               | 1                                                                                                                                          | 1                                                                                                                                             |
| CSR                                | 108         | 2012             | Jin H, Leng Q, Li C. Dietary flavonoid for preventing colorectal neoplasms. Cochrane Database of Systematic Reviews 2012, Issue 8. Art. No.: CD009350. DOI: 10.1002/14651858.CD009350.pub2.                                                                     | yes                | 1                               | 1                                                                                                                                          | 1                                                                                                                                             |

Tabelle1

| Status of publication used as inclusion criterion? (search for grey or unpublished literature?) | List of studies provided? (excluded studies referenced?) | Characteristics of included studies provided? | Scientific quality of included studies assessed and documented? (methods provided) | Scientific quality of included studies used appropriately in formulating conclusions? | Methods used to combine findings of studies appropriate? (mentions or describes heterogeneity?) | Likelihood of bias assessed? (graphical aids and/or statistical tests?) | Conflict of interest included? | Final Score | Grouping of scores (strong: ≥8=2; moderate: 4-7=1; weak) | health evidence / health systems evidence platforms |
|-------------------------------------------------------------------------------------------------|----------------------------------------------------------|-----------------------------------------------|------------------------------------------------------------------------------------|---------------------------------------------------------------------------------------|-------------------------------------------------------------------------------------------------|-------------------------------------------------------------------------|--------------------------------|-------------|----------------------------------------------------------|-----------------------------------------------------|
| 1                                                                                               | 1                                                        | 1                                             | 1                                                                                  | 1                                                                                     | 1                                                                                               | 1                                                                       | 1                              | 11          | 2                                                        | 6/9                                                 |
| 1                                                                                               | 1                                                        | 1                                             | 1                                                                                  | 1                                                                                     | 1                                                                                               | 1                                                                       | 1                              | 11          | 2                                                        | not found                                           |
| 1                                                                                               | 1                                                        | 1                                             | 1                                                                                  | 1                                                                                     | 1                                                                                               | 1                                                                       | 1                              | 11          | 2                                                        | 9 (strong)                                          |
| 1                                                                                               | 1                                                        | 1                                             | 1                                                                                  | 1                                                                                     | 1                                                                                               | 1                                                                       | 1                              | 11          | 2                                                        | not found                                           |
| 1                                                                                               | 1                                                        | 1                                             | 1                                                                                  | 1                                                                                     | 1 na                                                                                            | 1                                                                       | 1                              | 10          | 2                                                        | not found                                           |
| 1                                                                                               | 1                                                        | 1                                             | 1                                                                                  | 1                                                                                     | 1                                                                                               | 1                                                                       | 1                              | 11          | 2                                                        | not found                                           |
| 1                                                                                               | 1                                                        | 1                                             | 1                                                                                  | 1                                                                                     | 1                                                                                               | 1                                                                       | 1                              | 11          | 2                                                        | not found                                           |
| 1                                                                                               | 1                                                        | 1                                             | 1                                                                                  | 1                                                                                     | 1                                                                                               | 1                                                                       | 1                              | 11          | 2                                                        | not found                                           |

Tabelle1

|     |     |      |                                                                                                                                                                                                                                                                                                                              |     |   |   |   |
|-----|-----|------|------------------------------------------------------------------------------------------------------------------------------------------------------------------------------------------------------------------------------------------------------------------------------------------------------------------------------|-----|---|---|---|
| CSR | 109 | 2014 | Karmali KN, Davies P, Taylor F, Beswick A, Martin N, Ebrahim S. Promoting patient uptake and adherence in cardiac rehabilitation. <i>Cochrane Database of Systematic Reviews</i> 2014, Issue 6. Art. No.: CD007131. DOI: 10.1002/14651858.CD007131.pub3.                                                                     | yes | 1 | 1 | 1 |
| CSR | 110 | 2014 | Bjelakovic G, Gluud LL, Nikolova D, Whitfield K, Krstic G, Wetterslev J, Gluud C. Vitamin D supplementation for prevention of cancer in adults. <i>Cochrane Database of Systematic Reviews</i> 2014, Issue 6. Art. No.: CD007469. DOI: 10.1002/14651858.CD007469.pub2.                                                       | yes | 1 | 1 | 1 |
| CSR | 111 | 2014 | Carney T, Myers BJ, Louw J, Okwundu CI. Brief school-based interventions and behavioural outcomes for substance-using adolescents. <i>Cochrane Database of Systematic Reviews</i> 2014, Issue 2. Art. No.: CD008969. DOI: 10.1002/14651858.CD008969.pub2.                                                                    | yes | 1 | 1 | 1 |
| CSR | 112 | 2013 | Taylor MJ, Rudkin L, Bullemor-Day P, Lubin J, Chukwujekwu C, Hawton K. Strategies for managing sexual dysfunction induced by antidepressant medication. <i>Cochrane Database of Systematic Reviews</i> 2013, Issue 5. Art. No.: CD003382. DOI: 10.1002/14651858.CD003382.                                                    | yes | 1 | 1 | 1 |
| CSR | 113 | 2012 | Fonner VA, Denison J, Kennedy CE, O'Reilly K, Sweat M. Voluntary counseling and testing (VCT) for changing HIV-related risk behavior in developing countries. <i>Cochrane Database of Systematic Reviews</i> 2012, Issue 9. Art. No.: CD001224. DOI: 10.1002/14651858.CD001224.                                              | yes | 1 | 1 | 1 |
| CSR | 114 | 2012 | Shields L, Zhou H, Pratt J, Taylor M, Hunter J, Pascoe E. Family-centred care for hospitalised children aged 0-12 years. <i>Cochrane Database of Systematic Reviews</i> 2012, Issue 10. Art. No.: CD004811. DOI: 10.1002/14651858.CD004811.pub3.                                                                             | yes | 1 | 1 | 1 |
| CSR | 115 | 2014 | Nava F, Ghilotti F, Maggi L, Hatemi G, Del Bianco A, Merlo C, Filippini G, Tramacere I. Biologics, colchicine, corticosteroids, immunosuppressants and interferon-alpha for Neuro-Behçet's Syndrome. <i>Cochrane Database of Systematic Reviews</i> 2014, Issue 12. Art. No.: CD007796. DOI: 10.1002/14651858.CD007796.pub3. | yes | 1 | 1 | 1 |
| CSR | 116 | 2013 | Njei B, Kongnyuy EJ, Kumar S, Okwen MP, Sankar MJ, Mbuagbaw L. Optimal timing for antiretroviral therapy initiation in patients with HIV infection and concurrent cryptococcal meningitis. <i>Cochrane Database of Systematic Reviews</i> 2013, Issue 2. Art. No.: CD009103. DOI: 10.1002/14651858.CD009103.                 | yes | 1 | 1 | 1 |
| CSR | 117 | 2014 | Lager KE, Mistri AK, Khunti K, Haunton VJ, Sett AK, Wilson AD. Interventions for improving modifiable risk factor control in the secondary prevention of stroke. <i>Cochrane Database of Systematic Reviews</i> 2014, Issue 5. Art. No.: CD007796. DOI: 10.1002/14651858.CD007796.pub3.                                      | yes | 1 | 1 | 1 |
| CSR | 118 | 2013 | Chen W, Zhang Y, Li X, Yang G, Liu JP. Chinese herbal medicine for diabetic peripheral neuropathy. <i>Cochrane Database of Systematic Reviews</i> 2013, Issue 10. Art. No.: CD002800. DOI: 10.1002/14651858.CD002800.pub3.                                                                                                   | yes | 1 | 1 | 1 |
| CSR | 119 | 2011 | Fede G, Germani G, Gluud C, Gurusamy KS, Burroughs AK. Propylthiouracil for alcoholic liver disease. <i>Cochrane Database of Systematic Reviews</i> 2011, Issue 6. Art. No.: CD002800. DOI: 10.1002/14651858.CD002800.pub3.                                                                                                  | yes | 1 | 1 | 1 |



Tabelle1

|    |   |      |    |    |      |   |   |   |    |   |             |  |
|----|---|------|----|----|------|---|---|---|----|---|-------------|--|
| 1  |   |      |    |    |      |   |   |   |    |   |             |  |
| 2  |   |      |    |    |      |   |   |   |    |   |             |  |
| 3  |   |      |    |    |      |   |   |   |    |   |             |  |
| 4  |   |      |    |    |      |   |   |   |    |   |             |  |
| 5  |   |      |    |    |      |   |   |   |    |   |             |  |
| 6  | 1 | 1    | 1  | 1  | 1    | 1 | 1 | 1 | 11 | 2 | 9/10        |  |
| 7  |   |      |    |    |      |   |   |   |    |   |             |  |
| 8  |   |      |    |    |      |   |   |   |    |   |             |  |
| 9  | 1 | 1    | 1  | 1  | 1    | 1 | 1 | 1 | 11 | 2 | 9 (strong)  |  |
| 10 |   |      |    |    |      |   |   |   |    |   |             |  |
| 11 |   |      |    |    |      |   |   |   |    |   |             |  |
| 12 |   |      |    |    |      |   |   |   |    |   |             |  |
| 13 | 1 | 1    | 1  | 1  | 1    | 1 | 1 | 1 | 11 | 2 | 10 (strong) |  |
| 14 |   |      |    |    |      |   |   |   |    |   |             |  |
| 15 |   |      |    |    |      |   |   |   |    |   |             |  |
| 16 | 1 | 1    | 1  | 1  | 1    | 1 | 1 | 1 | 11 | 2 | not found   |  |
| 17 |   |      |    |    |      |   |   |   |    |   |             |  |
| 18 |   |      |    |    |      |   |   |   |    |   |             |  |
| 19 |   |      |    |    |      |   |   |   |    |   |             |  |
| 20 | 1 | 1    | 1  | 1  | 1    | 1 | 1 | 1 | 11 | 2 | 10/11       |  |
| 21 |   |      |    |    |      |   |   |   |    |   |             |  |
| 22 | 1 | 1    | 1  | 1  | 1 na |   | 1 | 1 | 10 | 2 | 9/10        |  |
| 23 |   |      |    |    |      |   |   |   |    |   |             |  |
| 24 |   |      |    |    |      |   |   |   |    |   |             |  |
| 25 |   |      |    |    |      |   |   |   |    |   |             |  |
| 26 | 1 | 1 na | na | na | na   |   | 1 | 1 | 7  | 1 | not found   |  |
| 27 |   |      |    |    |      |   |   |   |    |   |             |  |
| 28 |   |      |    |    |      |   |   |   |    |   |             |  |
| 29 | 1 | 1    | 1  | 1  | 1    | 1 | 1 | 1 | 11 | 2 | not found   |  |
| 30 |   |      |    |    |      |   |   |   |    |   |             |  |
| 31 |   |      |    |    |      |   |   |   |    |   |             |  |
| 32 |   |      |    |    |      |   |   |   |    |   |             |  |
| 33 | 1 | 1    | 1  | 1  | 1    | 1 | 1 | 1 | 11 | 2 | not found   |  |
| 34 |   |      |    |    |      |   |   |   |    |   |             |  |
| 35 | 1 | 1    | 1  | 1  | 1    | 1 | 1 | 1 | 11 | 2 | not found   |  |
| 36 |   |      |    |    |      |   |   |   |    |   |             |  |
| 37 |   |      |    |    |      |   |   |   |    |   |             |  |
| 38 | 1 | 1    | 1  | 1  | 1    | 1 | 1 | 1 | 11 | 2 | not found   |  |
| 39 |   |      |    |    |      |   |   |   |    |   |             |  |

1  
2  
3  
4  
5  
6  
7  
8  
9  
10  
11  
12  
13  
14  
15  
16  
17  
18  
19  
20  
21  
22  
23  
24  
25  
26  
27  
28  
29  
30  
31  
32  
33  
34  
35  
36  
37  
38  
39  
40  
41  
42  
43  
44  
45  
46

Tabelle1

|     |     |      |                                                                                                                                                                                                                                                                 |     |   |   |   |
|-----|-----|------|-----------------------------------------------------------------------------------------------------------------------------------------------------------------------------------------------------------------------------------------------------------------|-----|---|---|---|
| CSR | 120 | 2012 | Jefferson T, Rivetti A, Di Pietrantonj C, Demicheli V, Ferroni E. Vaccines for preventing influenza in healthy children. Cochrane Database of Systematic Reviews 2012, Issue 8. Art. No.: CD004879. DOI: 10.1002/14651858.CD004879.pub4.                        | yes | 1 | 1 | 1 |
| CSR | 121 | 2011 | Akl EA, Oxman AD, Herrin J, Vist GE, Terrenato I, Sperati F, Costiniuk C, Blank D, Schünemann H. Framing of health information messages. Cochrane Database of Systematic Reviews 2011, Issue 12. Art. No.: CD006777. DOI: 10.1002/14651858.CD006777.pub2.       | yes | 1 | 1 | 1 |
| CSR | 122 | 2011 | Smart NA, Marshall BJ, Daley M, Boulos E, Windus J, Baker N, Kwok N. Low-fat diets for acquired hypercholesterolaemia. Cochrane Database of Systematic Reviews 2011, Issue 2. Art. No.: CD007957. DOI: 10.1002/14651858.CD007957.pub2.                          | yes | 1 | 1 | 1 |
| CSR | 123 | 2011 | Cheuk DKL, Chiang AKS, Lee TL, Chan GCF, Ha SY. Vaccines for prophylaxis of viral infections in patients with hematological malignancies. Cochrane Database of Systematic Reviews 2011, Issue 3. Art. No.: CD006505. DOI: 10.1002/14651858.CD006505.pub2.       | yes | 1 | 1 | 1 |
| CSR | 124 | 2015 | Kwong JSW, Lau HLC, Yeung F, Chau PH. Yoga for secondary prevention of coronary heart disease. Cochrane Database of Systematic Reviews 2015, Issue 7. Art. No.: CD009506. DOI: 10.1002/14651858.CD009506.pub4.                                                  | yes | 1 | 1 | 1 |
| CSR | 125 | 2015 | Overdevest GM, Jacobs W, Vleggeert-Lankamp C, Thomé C, Gunzburg R, Peul W. Effectiveness of posterior decompression techniques compared with conventional laminectomy for lumbar stenosis. Cochrane Database of Systematic Reviews 2015, Issue 3. Art. No.: CD0 | yes | 1 | 1 | 1 |
| CSR | 126 | 2014 | Martí-Carvajal AJ, Knight-Madden JM, Martínez-Zapata MJ. Interventions for treating leg ulcers in people with sickle cell disease. Cochrane Database of Systematic Reviews 2014, Issue 12. Art. No.: CD008394. DOI: 10.1002/14651858.CD008394.pub3.             | yes | 1 | 1 | 1 |
| CSR | 127 | 2014 | Junker AE, Als-Nielsen B, Gluud C, Gluud LL. Dopamine agents for hepatic encephalopathy. Cochrane Database of Systematic Reviews 2014, Issue 2. Art. No.: CD003047. DOI: 10.1002/14651858.CD003047.pub3.                                                        | yes | 1 | 1 | 1 |
| CSR | 128 | 2013 | Peckham EJ, Nelson EA, Greenhalgh J, Cooper K, Roberts ER, Agrawal A. Homeopathy for treatment of irritable bowel syndrome. Cochrane Database of Systematic Reviews 2013, Issue 11. Art. No.: CD009710. DOI: 10.1002/14651858.CD009710.pub2.                    | yes | 1 | 1 | 1 |
| CSR | 129 | 2013 | Okwundu CI, Nagpal S, Musekiwa A, Sinclair D. Home- or community-based programmes for treating malaria. Cochrane Database of Systematic Reviews 2013, Issue 5. Art. No.: CD009527. DOI: 10.1002/14651858.CD009527.pub2.                                         | yes | 1 | 1 | 1 |
| CSR | 130 | 2013 | Rahimi-Movaghar A, Amin-Esmaili M, Hefazi M, Yousefi-Nooraie R. Pharmacological therapies for maintenance treatments of opium dependence. Cochrane Database of Systematic Reviews 2013, Issue 1. Art. No.: CD007775. DOI: 10.1002/14651858.CD007775.pub2.       | yes | 1 | 1 | 1 |

**Systematic reviews (non-Cochrane)**

Tabelle1

|    |   |      |    |    |    |   |   |   |    |   |                    |  |
|----|---|------|----|----|----|---|---|---|----|---|--------------------|--|
| 1  |   |      |    |    |    |   |   |   |    |   |                    |  |
| 2  |   |      |    |    |    |   |   |   |    |   |                    |  |
| 3  |   |      |    |    |    |   |   |   |    |   |                    |  |
| 4  |   |      |    |    |    |   |   |   |    |   |                    |  |
| 5  | 1 | 1    | 0  | 1  | 1  | 1 | 1 | 1 | 10 | 2 | 10 (strong)        |  |
| 6  |   |      |    |    |    |   |   |   |    |   |                    |  |
| 7  |   |      |    |    |    |   |   |   |    |   |                    |  |
| 8  | 1 | 1    | 1  | 1  | 1  | 1 | 1 | 1 | 11 | 2 | 10/11 & 9 (strong) |  |
| 9  |   |      |    |    |    |   |   |   |    |   |                    |  |
| 10 |   |      |    |    |    |   |   |   |    |   |                    |  |
| 11 | 1 | 1 na | na | na | na |   | 1 | 1 | 7  | 1 | not found          |  |
| 12 |   |      |    |    |    |   |   |   |    |   |                    |  |
| 13 |   |      |    |    |    |   |   |   |    |   |                    |  |
| 14 | 1 | 1    | 1  | 1  | 1  | 1 | 1 | 1 | 11 | 2 | not found          |  |
| 15 |   |      |    |    |    |   |   |   |    |   |                    |  |
| 16 |   |      |    |    |    |   |   |   |    |   |                    |  |
| 17 | 1 | 1 na | na | na | na |   | 1 | 1 | 7  | 1 | 9 (strong)         |  |
| 18 |   |      |    |    |    |   |   |   |    |   |                    |  |
| 19 |   |      |    |    |    |   |   |   |    |   |                    |  |
| 20 | 1 | 1    | 1  | 1  | 1  | 1 | 1 | 1 | 11 | 2 | not found          |  |
| 21 |   |      |    |    |    |   |   |   |    |   |                    |  |
| 22 |   |      |    |    |    |   |   |   |    |   |                    |  |
| 23 |   |      |    |    |    |   |   |   |    |   |                    |  |
| 24 | 1 | 1    | 1  | 1  | 1  | 1 | 1 | 1 | 11 | 2 | not found          |  |
| 25 |   |      |    |    |    |   |   |   |    |   |                    |  |
| 26 |   |      |    |    |    |   |   |   |    |   |                    |  |
| 27 | 1 | 1    | 1  | 1  | 1  | 1 | 1 | 1 | 11 | 2 | not found          |  |
| 28 |   |      |    |    |    |   |   |   |    |   |                    |  |
| 29 |   |      |    |    |    |   |   |   |    |   |                    |  |
| 30 | 1 | 1    | 1  | 1  | 1  | 1 | 1 | 1 | 11 | 2 | not found          |  |
| 31 |   |      |    |    |    |   |   |   |    |   |                    |  |
| 32 |   |      |    |    |    |   |   |   |    |   |                    |  |
| 33 | 1 | 1    | 0  | 1  | 1  | 1 | 1 | 1 | 10 | 2 | 10/10              |  |
| 34 |   |      |    |    |    |   |   |   |    |   |                    |  |
| 35 |   |      |    |    |    |   |   |   |    |   |                    |  |
| 36 | 1 | 1    | 1  | 1  | 1  | 1 | 1 | 1 | 11 | 2 | not found          |  |
| 37 |   |      |    |    |    |   |   |   | 11 |   |                    |  |

Tabelle1

|    |     |      |                                                                                                                                                                                                                                                                                                                                                                                       |                |   |   |   |
|----|-----|------|---------------------------------------------------------------------------------------------------------------------------------------------------------------------------------------------------------------------------------------------------------------------------------------------------------------------------------------------------------------------------------------|----------------|---|---|---|
| SR | 131 | 2015 | Rush CJ, Campbell RT, Jhund PS, et al. Falling cardiovascular mortality in heart failure with reduced ejection fraction and implications for clinical trials. <i>JACC Heart Fail.</i> 2015;3(8):603–14.                                                                                                                                                                               | none mentioned | 1 | 1 | 1 |
| SR | 132 | 2015 | Foersch M, Jacobs C, Wriedt S, Hechtner M, Wehrbein H. Effectiveness of maxillary protraction using facemask with or without maxillary expansion: a systematic review and meta-analysis. <i>Clinical Oral Investigations</i> [serial online]. July 2015;19(6):1181-119                                                                                                                | yes            | 1 | 1 | 1 |
| SR | 133 | 2015 | Sipe TA, Finnie RKC, Knopf JA, et al. Effects of mental health benefits legislation: A Community Guide systematic review. <i>Am J Prev Med.</i> 2015;48(6):755–766.                                                                                                                                                                                                                   | yes            | 1 | 1 | 1 |
| SR | 134 | 2013 | A.A. Ahmed, E. Alsharief, A. Alsharief, Intensive versus conventional glycemc control: what is best for patients with type 2 diabetes? <i>Diabetes Metab Syndr</i> , 7 (2013), pp. 48–51                                                                                                                                                                                              | none mentioned | 1 | 1 | 1 |
| SR | 135 | 2012 | M. Panagioti, P.A. Gooding, N. Tarrier A meta-analysis of the association between posttraumatic stress disorder and suicidality: the role of comorbid depression; <i>Compr. Psychiatry</i> , 53 (2012), pp. 915–930                                                                                                                                                                   | none mentioned | 1 | 1 | 1 |
| SR | 136 | 2015 | Z. Wang Age-dependent decline of association between obesity and mortality: a systematic review and meta-analysis <i>Obes Res Clin Pract</i> , 9 (2015), pp. 1–11                                                                                                                                                                                                                     | yes            | 1 | 1 | 1 |
| SR | 137 | 2015 | E. Rolka A systematic review of music and dyslexia, <i>The Arts in Psychotherapy</i> , 46 (2015), pp 24-32                                                                                                                                                                                                                                                                            | no             | 1 | 1 | 1 |
| SR | 138 | 2011 | Wu S, Cohen D, Shi Y, Pearson M, Sturm R. Economic analysis of physical activity interventions. <i>Am J Prev Med.</i> 2011;40(2):149–58.                                                                                                                                                                                                                                              | none mentioned | 1 | 1 | 1 |
| SR | 139 | 2012 | Rodgers M, Asaria M, Walker S, McMillan D, Luccock M, Harden M, et al. The clinical effectiveness and cost-effectiveness of low-intensity psychological interventions for the secondary prevention of relapse after depression: a systematic review. <i>Health Techn</i>                                                                                                              | yes            | 1 | 1 | 1 |
| SR | 140 | 2015 | Chien T-J, Liu C-Y, Chang Y-F, Fang C-J, Hsu C-H. Acupuncture for Treating Aromatase Inhibitor-Related Arthralgia in Breast Cancer: A Systematic Review and Meta-Analysis. <i>Journal of Alternative and Complementary Medicine.</i> 2015;21(5):251-260. doi:10.1089/acm.2014.0083.                                                                                                   | none mentioned | 1 | 1 | 1 |
| SR | 141 | 2013 | Int J Integr Care 2013; Jul–Sep; URN:NBN:NL:UL:10-1-114740 , Community services' involvement in the discharge of older adults from hospital into the community,                                                                                                                                                                                                                       | none mentioned | 1 | 1 | 1 |
| SR | 142 | 2012 | Johantgen M, Fountain L, Zangaro G, Newhouse R, Stanik-Hutt J, White K. Comparison of labor and delivery care provided by certified nurse-midwives and physicians: a systematic review, 1990 to 2008. <i>Womens Health Issues Off Publ Jacobs Inst Womens Health.</i> 2012;22:e73–e81. doi: 10.1016/j.whi.2011.06.005.                                                                | none mentioned | 1 | 1 | 1 |
| SR | 143 | 2015 | Rozet, F., Bastide, C., Beuzeboc, P., Cormier, L., Fromont, G., Hennequin, C., Soulié, A6:1134 (2015). [Management of low-risk prostate cancer]. <i>Progrès En Urologie : Journal de l'Association Française d'urologie et de La Société Française d'urologie,</i> 25(1), 1–10. <a href="https://doi.org/10.1016/j.purol.2014.10.007">https://doi.org/10.1016/j.purol.2014.10.007</a> | none mentioned | 1 | 0 | 0 |

Tabelle1

|    |   |   |   |   |    |   |   |   |    |    |                   |            |
|----|---|---|---|---|----|---|---|---|----|----|-------------------|------------|
| 1  |   |   |   |   |    |   |   |   |    |    |                   |            |
| 2  |   |   |   |   |    |   |   |   |    |    |                   |            |
| 3  |   |   |   |   |    |   |   |   |    |    |                   |            |
| 4  |   |   |   |   |    |   |   |   |    |    |                   |            |
| 5  | 0 | 0 | 1 | 0 | 0  | 1 | 0 | 0 | 5  | 1  | not found         |            |
| 6  |   |   |   |   |    |   |   |   |    |    |                   |            |
| 7  |   |   |   |   |    |   |   |   |    |    |                   |            |
| 8  |   |   |   |   |    |   |   |   |    |    |                   |            |
| 9  | 1 | 1 | 1 | 1 | 1  | 1 | 1 | 1 | 11 | 2  | not found         |            |
| 10 | 1 | 1 | 0 | 1 | 1  | 0 | 0 | 0 | 7  | 1  | 5/10 & 9 (strong) |            |
| 11 |   |   |   |   |    |   |   |   |    |    |                   |            |
| 12 |   |   |   |   |    |   |   |   |    |    |                   |            |
| 13 | 1 | 0 | 1 | 1 | 1  | 0 | 0 | 1 | 8  | 2  | not found         |            |
| 14 |   |   |   |   |    |   |   |   |    |    |                   |            |
| 15 |   |   |   |   |    |   |   |   |    |    |                   |            |
| 16 | 0 | 1 | 1 | 1 | 1  | 1 | 1 | 1 | 0  | 9  | 2                 | not found  |
| 17 |   |   |   |   |    |   |   |   |    |    |                   |            |
| 18 | 1 | 1 | 1 | 1 | 1  | 1 | 1 | 0 | 1  | 10 | 2                 | not found  |
| 19 |   |   |   |   |    |   |   |   |    |    |                   |            |
| 20 | 1 | 1 | 1 | 0 | 0  | 0 | 0 | 0 | 6  | 1  | not found         |            |
| 21 |   |   |   |   |    |   |   |   |    |    |                   |            |
| 22 | 0 | 1 | 0 | 0 | 0  | 0 | 0 | 0 | 4  | 1  | not found         |            |
| 23 |   |   |   |   |    |   |   |   |    |    |                   |            |
| 24 |   |   |   |   |    |   |   |   |    |    |                   |            |
| 25 |   |   |   |   |    |   |   |   |    |    |                   |            |
| 26 | 1 | 1 | 0 | 1 | 1  | 1 | 1 | 1 | 1  | 10 | 2                 | 8 (strong) |
| 27 |   |   |   |   |    |   |   |   |    |    |                   |            |
| 28 |   |   |   |   |    |   |   |   |    |    |                   |            |
| 29 | 1 | 0 | 1 | 1 | 1  | 1 | 1 | 0 | 1  | 9  | 2                 | not found  |
| 30 |   |   |   |   |    |   |   |   |    |    |                   |            |
| 31 |   |   |   |   |    |   |   |   |    |    |                   |            |
| 32 | 1 | 0 | 0 | 1 | 1  | 0 | 0 | 0 | 6  | 1  | not found         |            |
| 33 |   |   |   |   |    |   |   |   |    |    |                   |            |
| 34 |   |   |   |   |    |   |   |   |    |    |                   |            |
| 35 | 0 | 0 | 1 | 1 | 1  | 1 | 1 | 0 | 0  | 7  | 1                 | not found  |
| 36 |   |   |   |   |    |   |   |   |    |    |                   |            |
| 37 |   |   |   |   |    |   |   |   |    |    |                   |            |
| 38 |   |   |   |   |    |   |   |   |    |    |                   |            |
| 39 | 0 | 0 | 0 | 0 | na | 1 | 0 | 1 | 3  | 0  | not found         |            |

1  
2  
3  
4  
5  
6  
7  
8  
9  
10  
11  
12  
13  
14  
15  
16  
17  
18  
19  
20  
21  
22  
23  
24  
25  
26  
27  
28  
29  
30  
31  
32  
33  
34  
35  
36  
37  
38  
39  
40  
41  
42  
43  
44  
45  
46

Tabelle1

|    |     |      |                                                                                                                                                                                                                                                                                                                                                                 |                |   |   |   |
|----|-----|------|-----------------------------------------------------------------------------------------------------------------------------------------------------------------------------------------------------------------------------------------------------------------------------------------------------------------------------------------------------------------|----------------|---|---|---|
|    |     |      | Maglione, Margaret A.; Das, Lopamudra; Raaen, Laura; et al. Safety of Vaccines Used for Routine Immunization of US Children: A Systematic Review PEDIATRICS Volume: 134 Issue: 2 Pages: 325-337 Published: AUG 2014 DOI <a href="http://dx.doi.org/10.1542/peds">http://dx.doi.org/10.1542/peds</a> .                                                           | yes            | 1 | 1 | 1 |
| SR | 144 | 2014 |                                                                                                                                                                                                                                                                                                                                                                 |                |   |   |   |
|    |     |      | Albrecht B, Staiger PK, Hall K, et al. (2014) Benzodiazepine use and aggressive behaviour: A systematic review. Australian and New Zealand Journal of Psychiatry 48: 1096–1114. doi: 10.1177/0004867414548902                                                                                                                                                   | yes            | 1 | 1 | 1 |
| SR | 145 | 2014 |                                                                                                                                                                                                                                                                                                                                                                 |                |   |   |   |
|    |     |      | Te Morenga Lisa, Mallard Simonette, Mann Jim. Dietary sugars and body weight: systematic review and meta-analyses of randomised controlled trials and cohort studies BMJ 2013; 346 :e7492 doi: <a href="http://dx.doi.org/10.1136/bmj.e7492">http://dx.doi.org/10.1136/bmj.e7492</a>                                                                            | yes            | 1 | 1 | 1 |
| SR | 146 | 2012 |                                                                                                                                                                                                                                                                                                                                                                 |                |   |   |   |
|    |     |      | Jeannette A. C. Lankhaar, Wouter R. de Vries, Jaap A. C. G. Jansen, Pierre M. J. Zelissen & Frank J. G. Backx (2014) Impact of Overt and Subclinical Hypothyroidism on Exercise Tolerance: A Systematic Review, Research Quarterly for Exercise and Sport, 85:3, 365-389, DOI: 10.1080/02701367.2014.930405                                                     | none mentioned | 1 | 1 | 1 |
| SR | 147 | 2014 |                                                                                                                                                                                                                                                                                                                                                                 |                |   |   |   |
|    |     |      | Vanessa Siffredi , Vicki Anderson , Richard J. Leventer & Megan M. Spencer- Smith (2013) Neuropsychological Profile of Agenesis of the Corpus Callosum: A Systematic Review, Developmental Neuropsychology, 38:1, 36-57, DOI: 10.1080/87565641.2012.721421                                                                                                      | none mentioned | 1 | 1 | 1 |
| SR | 148 | 2013 |                                                                                                                                                                                                                                                                                                                                                                 |                |   |   |   |
|    |     |      | Llewellyn, A., Simmonds, M., Owen, C. G., and Woolacott, N. (2015) Childhood obesity as a predictor of morbidity in adulthood: a systematic review and meta-analysis. Obes Rev, 17: 56–67. doi: 10.1111/obr.12316.                                                                                                                                              | yes            | 1 | 0 | 1 |
| SR | 149 | 2015 |                                                                                                                                                                                                                                                                                                                                                                 |                |   |   |   |
|    |     |      | Matsuda, A., Yamaoka, K., Tango, T., Matsuda, T., Nishimoto, H. (2014). Effectiveness of psychoeducational support on quality of life in early-stage breast cancer patients: A systematic review and meta-analysis of randomized controlled trials. Qual Life R                                                                                                 | none mentioned | 1 | 1 | 1 |
| SR | 150 | 2014 |                                                                                                                                                                                                                                                                                                                                                                 |                |   |   |   |
|    |     |      | A. Bak, J. Browne, H. P. Loveday and A. Tsiami (2013). Systematic review of nutritional interventions to prevent healthcare-associated infections in undernourished elderly. Proceedings of the Nutrition Society, 72, E212 doi:10.1017/S0029665113002371.                                                                                                      | yes            | 1 | 0 | 1 |
| SR | 151 | 2013 |                                                                                                                                                                                                                                                                                                                                                                 |                |   |   |   |
|    |     |      | L. Bourke, K. E. Homer, M. A. Thaha, L. Steed, D. J. Rosario, K. A. Robb, J. M. Saxton and S. J. C. Taylor Interventions to improve exercise behaviour in sedentary people living with and beyond cancer: A systematic review British Journal of Cancer (2014)                                                                                                  | yes            | 1 | 1 | 1 |
| SR | 152 | 2014 |                                                                                                                                                                                                                                                                                                                                                                 |                |   |   |   |
|    |     |      | BRAY, James et al. Effectiveness of parent-centred interventions [etc]. JBI Library of Systematic Reviews, [S.I.], v. 8, n. 16 Suppl, p. S34 - 45, jul. 2010. ISSN 1838-2142. <a href="http://www.joannabriggslibrary.org/jbilibrary/index.php/jbisrir/article/view/571/">http://www.joannabriggslibrary.org/jbilibrary/index.php/jbisrir/article/view/571/</a> | yes            | 1 | 1 | 0 |
| SR | 153 | 2013 |                                                                                                                                                                                                                                                                                                                                                                 |                |   |   |   |
|    |     |      | Tricco AC, Antony J, Khan PA, et al. Safety and effectiveness of dipeptidyl peptidase-4 inhibitors versus intermediate-acting insulin or placebo for patients with type 2 diabetes failing two oral antihyperglycaemic agents: a systematic review and network meta-analysis. BMJ Open 2014;4:e005752. doi:10.1136/bmjopen-2014-005752                          | yes            | 1 | 1 | 1 |
| SR | 154 | 2014 |                                                                                                                                                                                                                                                                                                                                                                 |                |   |   |   |

1  
2  
3  
4  
5  
6  
7  
8  
9  
10  
11  
12  
13  
14  
15  
16  
17  
18  
19  
20  
21  
22  
23  
24  
25  
26  
27  
28  
29  
30  
31  
32  
33  
34  
35  
36  
37  
38  
39  
40  
41  
42  
43  
44  
45  
46

Tabelle1

|   |   |   |   |   |   |   |   |   |   |    |   |             |
|---|---|---|---|---|---|---|---|---|---|----|---|-------------|
| 1 | 0 | 0 | 0 | 0 | 0 | 0 | 0 | 0 | 1 | 5  | 1 | 3 (weak)    |
| 1 | 0 | 1 | 0 | 0 | 0 | 1 | 1 | 1 | 1 | 8  | 2 | not found   |
| 1 | 0 | 1 | 0 | 0 | 0 | 1 | 1 | 1 | 1 | 8  | 2 | not found   |
| 0 | 0 | 1 | 1 | 1 | 1 | 1 | 0 | 0 | 0 | 7  | 1 | not found   |
| 0 | 0 | 1 | 0 | 0 | 0 | 0 | 0 | 0 | 0 | 4  | 1 | not found   |
| 0 | 1 | 1 | 1 | 1 | 1 | 1 | 1 | 1 | 1 | 9  | 2 | not found   |
| 0 | 0 | 1 | 1 | 1 | 1 | 1 | 0 | 0 | 0 | 7  | 1 | not found   |
| 0 | 0 | 1 | 0 | 0 | 1 | 0 | 0 | 0 | 0 | 4  | 1 | not found   |
| 1 | 1 | 1 | 1 | 1 | 1 | 1 | 1 | 1 | 0 | 10 | 2 | 10 (strong) |
| 0 | 0 | 0 | 0 | 0 | 0 | 1 | 1 | 1 | 1 | 5  | 1 | not found   |
| 0 | 1 | 1 | 1 | 1 | 1 | 1 | 1 | 1 | 1 | 10 | 2 | not found   |



Tabelle1

|    |     |      |                                                                                                                                                                                                                                                                                                             |                |   |   |   |
|----|-----|------|-------------------------------------------------------------------------------------------------------------------------------------------------------------------------------------------------------------------------------------------------------------------------------------------------------------|----------------|---|---|---|
| SR | 155 | 2012 | Agarwal R, Goldenberg M, Perry R, Ishak WW. The Quality of Life of Adults with Attention Deficit Hyperactivity Disorder: A Systematic Review. <i>Innovations in Clinical Neuroscience</i> . 2012;9(5-6):10-21.                                                                                              | no             | 1 | 0 | 1 |
| SR | 156 | 2013 | Ian C. Scott, Rachael Tan, Daniel Stahl, Sophia Steer, Cathryn M. Lewis, and Andrew P. Cope The protective effect of alcohol on developing rheumatoid arthritis: a systematic review and meta-analysis <i>Rheumatology</i> (2013) 52 (5): 856-867 first published onli                                      | none mentioned | 1 | 1 | 1 |
| SR | 157 | 2014 | Hu MB, Xu H, Bai PD, et al. Obesity has multifaceted impact on biochemical recurrence of prostate cancer: a dose-response meta-analysis of 36,927 patients. <i>Med Oncol</i> 2014; 31:829. DOI: 10.1007/s12032-013-0829-8                                                                                   | none mentioned | 1 | 1 | 1 |
| SR | 158 | 2014 | Blasco, M.A., Redleaf, M.I., 2014. Cochlear implantation in unilateral sudden deafness improves tinnitus and speech comprehension: meta-analysis and systematic review. <i>Otol. Neurotol.</i> 35 (8), 1426-1432. DOI: 10.1097/MAO.0000000000000431                                                         | none mentioned | 1 | 1 | 1 |
| SR | 159 | 2014 | Vasconcellos, Fabricio; Seabra, Andre; Katzmarzyk, Peter T.; et al., Physical Activity in Overweight and Obese Adolescents: Systematic Review of the Effects on Physical Fitness Components and Cardiovascular Risk Factors <i>SPORTS MEDICINE</i> Volume: 44 Issue: 8 Pages: 1139-1152 Published: AUG 2014 | none mentioned | 1 | 1 | 1 |
| SR | 160 | 2015 | Gibbs et al., 2014, M. Gibbs, C. Winsper, S. Marwaha, E. Gilbert, M. Broome, S.P. Singh, Cannabis use and mania symptoms: a systematic review and meta-analysis <i>J. Affect. Disord.</i> , 171C (2014), pp. 39–47, doi:10.1016/j.jad.2014.09.016                                                           | yes            | 1 | 1 | 1 |

**Rapid reviews**

1  
2  
3  
4  
5  
6  
7  
8  
9  
10  
11  
12  
13  
14  
15  
16  
17  
18  
19  
20  
21  
22  
23  
24  
25  
26  
27  
28  
29  
30  
31  
32  
33  
34  
35  
36  
37  
38  
39  
40  
41  
42  
43  
44  
45  
46

Tabelle1

|   |   |   |   |    |  |   |   |   |    |   |           |
|---|---|---|---|----|--|---|---|---|----|---|-----------|
| 0 | 0 | 1 | 0 | na |  | 0 | 0 | 1 | 4  | 1 | not found |
| 0 | 0 | 1 | 0 | 0  |  | 1 | 0 | 1 | 6  | 1 | not found |
| 1 | 0 | 1 | 0 | 1  |  | 1 | 1 | 1 | 9  | 2 | not found |
| 1 | 1 | 1 | 0 | 0  |  | 0 | 0 | 1 | 7  | 1 | not found |
| 1 | 1 | 1 | 1 | 1  |  | 1 | 0 | 1 | 10 | 2 | not found |
| 1 | 1 | 1 | 1 | 1  |  | 1 | 1 | 1 | 11 | 2 | not found |
|   |   |   |   |    |  |   |   |   | 7  |   |           |

Review only

Tabelle1

|    |     |      |                                                                                                                                                                                                                                                                                                                                              |                |   |   |   |
|----|-----|------|----------------------------------------------------------------------------------------------------------------------------------------------------------------------------------------------------------------------------------------------------------------------------------------------------------------------------------------------|----------------|---|---|---|
| RR | 161 | 2015 | Sedation and Anesthesia Options for Diagnostic Procedures: A Review of Clinical Effectiveness and Guidelines                                                                                                                                                                                                                                 | no protocol    | 1 | 1 | 1 |
| RR | 162 | 2014 | Menear M, Briand C.. Implementing a continuum of evidence-based psychosocial interventions for people with severe mental illness: part 1-review of major initiatives and implementation strategies. <i>Can J Psychiatry</i> (2014) 59(4):178–86.                                                                                             | no protocol    | 0 | 1 | 1 |
| RR | 163 | 2014 | Saeed S, Golfam M, Beall RF, Ashbury FD, Palmer LJ, Little J. Effectiveness of individual-focused interventions to prevent chronic disease. <i>Eur J Clin Invest</i> 2014;44:883–91.                                                                                                                                                         | none mentioned | 1 | 1 | 1 |
| RR | 164 | 2015 | Sara A Kreindler, Yang Cui, Colleen J Metge, Melissa Raynard, Patient characteristics associated with longer emergency department stay: a rapid review, <i>Emerg Med J</i> 2016;33:3 194-199 Published Online First: 4 September 2015 doi:10.1136/emmermed-2015-204913                                                                       | yes            | 1 | 0 | 0 |
| RR | 165 | 2015 | Chetan R Trivedy, Matthew W Cooke, Unscheduled return visits (URV) in adults to the emergency department (ED): a rapid evidence assessment policy review, <i>Emerg Med J</i> 2015;32:4 324-329 Published Online First: 28 October 2013 doi:10.1136/emmermed-2013-202719                                                                      | none mentioned | 1 | 0 | 1 |
| RR | 166 | 2014 | J. Yu, Y. Wang, Y. Li, X. Li, C. Li, J.T. Shen, PHP74 - The DA Vinci Surgical System: A Rapid Review of the Clinical and Economic Evidence, <i>Value in Health</i> , Volume 17, Issue 7, November 2014, Page A798, ISSN 1098-3015, <a href="http://dx.doi.org/10.1016/j.jval.2014.08.476">http://dx.doi.org/10.1016/j.jval.2014.08.476</a> . | none mentioned | 1 | 1 | 0 |
| RR | 167 | 2014 | Lal S, Adair CE. E-mental health: a rapid review of the literature. <i>Psychiatr Serv</i> . 2014;65:24–32.                                                                                                                                                                                                                                   | none mentioned | 1 | 0 | 0 |
| RR | 168 | 2014 | Beall RF, Baskerville N, Golfam M, Saeed S, Little J. Modes of delivery in prevention intervention studies: a rapid review. <i>Eur J Clin Invest</i> 2014;44:688–96. DOI: 10.1111/eci.12279                                                                                                                                                  | yes            | 1 | 1 | 1 |
| RR | 169 | 2013 | Jiwa, M., McManus, A., and Dadich, A. (2013) Continuity of cancer care: Where do primary care practitioners fit in? <i>Cancer Forum</i> , 37(1): 31-34.                                                                                                                                                                                      | yes            | 1 | 0 | 0 |
| RR | 170 | 2014 | Movement Therapies for the Self-Management of Chronic Pain Symptoms, Courtney Lee, Cindy Crawford, Eric Schoomaker, Active Self-Care Therapies for Pain (PACT) Working Group, <i>Pain Medicine</i> Apr 2014, 15 (S1) S40-S53; DOI: 10.1111/pme.12411                                                                                         | yes            | 1 | 1 | 1 |
| RR | 171 | 2012 | Boyce T, Holmes A (2012) Addressing Health Inequalities in the Delivery of the Human Papillomavirus Vaccination Programme: Examining the Role of the School Nurse. <i>PLoS ONE</i> 7(9): e43416. doi:10.1371/journal.pone.0043416                                                                                                            | none mentioned | 1 | 0 | 0 |
| RR | 172 | 2011 | Attree P, French B, Milton B, Povall S, Whitehead M, Popay J. The experience of community engagement for individuals: a rapid review of evidence. <i>Health &amp; Social Care In The Community</i> [serial online]. May 2011;19(3):250-260. Available from: MEDLINE, Ipswich, MA. doi: 10.1111/j.1365-2524.2010.00976.x                      | none mentioned | 1 | 0 | 1 |
| RR | 173 | 2014 | Sensory Art Therapies for the Self-Management of Chronic Pain Symptoms, Cindy Crawford, Courtney Lee, John Bingham, Active Self-Care Therapies for Pain (PACT) Working Group, <i>Pain Medicine</i> Apr 2014, 15 (S1) S66-S75; DOI: 10.1111/pme.12409                                                                                         | none mentioned | 1 | 0 | 0 |

1  
2  
3  
4  
5  
6  
7  
8  
9  
10  
11  
12  
13  
14  
15  
16  
17  
18  
19  
20  
21  
22  
23  
24  
25  
26  
27  
28  
29  
30  
31  
32  
33  
34  
35  
36  
37  
38  
39  
40  
41  
42  
43  
44  
45  
46

Tabelle1

|   |   |   |   |   |   |   |   |   |   |   |           |   |
|---|---|---|---|---|---|---|---|---|---|---|-----------|---|
| 1 | 1 | 1 | 1 | 1 | 1 | 1 | 0 | 0 | 9 | 2 | not found | 9 |
| 0 | 0 | 0 | 0 | 0 | 0 | 0 | 0 | 1 | 3 | 0 | not found |   |
| 0 | 0 | 0 | 0 | 0 | 0 | 1 | 0 | 0 | 4 | 1 | not found | 4 |
| 0 | 1 | 1 | 0 | 0 | 0 | 0 | 0 | 1 | 4 | 1 | not found |   |
| 0 | 0 | 0 | 0 | 0 | 0 | 1 | 0 | 1 | 4 | 1 | not found | 4 |
| 0 | 0 | 0 | 0 | 0 | 0 | 0 | 0 | 0 | 2 | 0 | not found |   |
| 0 | 0 | 0 | 0 | 0 | 0 | 0 | 0 | 1 | 2 | 0 | not found |   |
| 0 | 0 | 0 | 0 | 0 | 0 | 0 | 0 | 0 | 3 | 0 | not found |   |
| 0 | 0 | 0 | 0 | 0 | 1 | 0 | 0 | 0 | 2 | 0 | not found |   |
| 0 | 0 | 1 | 1 | 0 | 0 | 0 | 0 | 1 | 6 | 1 | not found | 6 |
| 0 | 0 | 0 | 0 | 0 | 0 | 0 | 0 | 1 | 2 | 0 | not found |   |
| 0 | 0 | 0 | 0 | 0 | 0 | 0 | 0 | 1 | 3 | 0 | not found |   |
| 0 | 0 | 1 | 1 | 1 | 0 | 1 | 1 | 1 | 6 | 1 | not found |   |

Tabelle1

|    |     |      |                                                                                                                                                                                                                                                                                                                                                                                          |                |   |   |   |
|----|-----|------|------------------------------------------------------------------------------------------------------------------------------------------------------------------------------------------------------------------------------------------------------------------------------------------------------------------------------------------------------------------------------------------|----------------|---|---|---|
| RR | 174 | 2013 | Ndumbe-Eyoh S, Moffatt H. Intersectoral action for health equity: a rapid systematic review. BMC Public Health. 2013;13:1056-2458-13-1056. DOI: 10.1186/1471-2458-13-1056                                                                                                                                                                                                                | yes            | 1 | 1 | 1 |
| RR | 175 | 2014 | Brunton, G., Paraskeva, N., Caird, J., Bird, K. S., Kavanagh, J., Kwan, I., & ... Thomas, J. (2014). Psychosocial predictors, assessment, and outcomes of cosmetic procedures: a systematic rapid evidence assessment. Aesthetic Plastic Surgery, 38(5), 1030-1040. doi:10.1007/s00266-014-0369-4                                                                                        | yes            | 1 | 0 | 1 |
| RR | 176 | 2011 | Geddes et al., 2011, R. Geddes, J. Frank, S. Haw, A rapid review of key strategies to improve the cognitive and social development of children in Scotland, Health Policy, 101 (2011), pp. 20–28 doi:10.1016/j.healthpol.2010.08.013                                                                                                                                                     | none mentioned | 1 | 1 | 1 |
| RR | 177 | 2013 | Humphreys, DK, Ogilvie, D. Synthesising evidence for equity impacts of population-based physical activity interventions: A pilot study. Int J Behav Nutr Phys Act. 2013;10:76. DOI: 10.1186/1479-5868-10-76                                                                                                                                                                              | none mentioned | 1 | 0 | 1 |
| RR | 178 | 2014 | Muñoz, K., Caballero, A., & White, K. (2014). Effectiveness of questionnaires for screening hearing of school-age children: a comprehensive literature review. International Journal Of Audiology, 53(12), 910-914. doi:10.3109/14992027.2014.943846                                                                                                                                     | yes            | 1 | 0 | 1 |
| RR | 179 | 2014 | Physically Oriented Therapies for the Self-Management of Chronic Pain Symptoms, Cindy Crawford, Courtney Lee, Todd May, Active Self-Care Therapies for Pain (PACT) Working Group, Pain Medicine Apr 2014, 15 (S1) S54-S65; DOI: 10.1111/pme.12410                                                                                                                                        | none mentioned | 1 | 1 | 1 |
| RR | 180 | 2014 | Moe-Byrne, T., Chambers, D., Harden, M., McDaid, C., Behaviour change interventions to promote prescribing of generic drugs: A rapid evidence synthesis and systematic review (2014) BMJ Open, 4 (5), art. no. e004623. doi: 10.1136/bmjopen-2013-004623                                                                                                                                 | yes            | 1 | 1 | 1 |
| RR | 181 | 2014 | Hithersay R, Strydom A, Moulster G & Buszewicz M (2014) Carer-led health interventions to monitor, promote and improve the health of adults with intellectual disabilities in the community: a systematic review. Research in Developmental Disabilities 35, 887–907. doi: 10.1016/j.ridd.2014.01.010                                                                                    | yes            | 1 | 1 | 1 |
| RR | 182 | 2011 | Mann R, Gilbody S. Validity of two case finding questions to detect postnatal depression: a review of diagnostic test accuracy. J Affect Disord. 2011;133:388–97. doi:10.1016/j.jad.2010.11.015.                                                                                                                                                                                         | yes            | 1 | 0 | 1 |
| RR | 183 | 2013 | Barry, M. M., D'Eath, M., & Sixsmith, J. (2013). Interventions for improving population health literacy: insights from a rapid review of the evidence. Journal Of Health Communication, 18(12), 1507-1522. doi:10.1080/10810730.2013.840699                                                                                                                                              | yes            | 1 | 1 | 1 |
| RR | 184 | 2013 | Beck, C. R., Sokal, R., Arunachalam, N., Puleston, R., Cichowska, A., Kessel, A., Zambon, M., Nguyen-Van-Tam, J. S. and on behalf of the UK Antiviral Effectiveness Review Group (2013), Neuraminidase inhibitors for influenza: a review and public health perspective in the aftermath of the 2009 pandemic. Influenza and Other Respiratory Viruses, 7: 14–24. doi: 10.1111/irv.12048 |                | 1 | 1 | 0 |

Tabelle1

1  
2  
3  
4  
5  
6  
7  
8  
9  
10  
11  
12  
13  
14  
15  
16  
17  
18  
19  
20  
21  
22  
23  
24  
25  
26  
27  
28  
29  
30  
31  
32  
33  
34  
35  
36  
37  
38  
39  
40  
41  
42  
43  
44  
45  
46

|    |   |   |   |   |   |   |   |   |   |    |   |                                                                      |    |
|----|---|---|---|---|---|---|---|---|---|----|---|----------------------------------------------------------------------|----|
| 1  | 1 | 0 | 1 | 1 | 1 | 1 | 1 | 1 | 1 | 10 | 2 | 7/10                                                                 | 10 |
| 2  | 1 | 0 | 0 | 1 | 1 | 1 | 1 | 0 | 1 | 7  | 1 | not found                                                            | 7  |
| 3  | 0 | 0 | 0 | 0 | 0 | 0 | 0 | 0 | 0 | 3  | 0 | not found                                                            |    |
| 4  | 0 | 0 | 0 | 0 | 0 | 1 | 0 | 1 | 4 | 1  | 1 | not found                                                            |    |
| 5  | 0 | 0 | 1 | 0 | 0 | 0 | 0 | 0 | 1 | 4  | 1 | 6 (moderate)                                                         |    |
| 6  | 0 | 0 | 1 | 1 | 1 | 1 | 1 | 1 | 1 | 9  | 2 | not found<br>na (no rating tool available for this type of document) | 9  |
| 7  | 0 | 0 | 1 | 1 | 0 | 0 | 0 | 0 | 1 | 6  | 1 | not found                                                            |    |
| 8  | 0 | 0 | 1 | 1 | 1 | 1 | 0 | 1 | 1 | 7  | 1 | not found                                                            |    |
| 9  | 0 | 0 | 1 | 1 | 1 | 1 | 1 | 1 | 0 | 8  | 2 | 7 (moderate)                                                         | 8  |
| 10 | 0 | 0 | 0 | 0 | 0 | 1 | 0 | 0 | 1 | 4  | 1 | not found                                                            | 4  |

Tabelle1

|    |     |      |                                                                                                                                                                                                                                                                                                                                                                    |                |   |   |   |
|----|-----|------|--------------------------------------------------------------------------------------------------------------------------------------------------------------------------------------------------------------------------------------------------------------------------------------------------------------------------------------------------------------------|----------------|---|---|---|
| RR | 185 | 2012 | McMurrin, M. (2012). Individual-level interventions for alcohol-related violence: a rapid evidence assessment. <i>Criminal Behaviour And Mental Health: CBMH</i> , 22(1), 14-28. doi:10.1002/cbm.821                                                                                                                                                               | yes            | 1 | 0 | 1 |
| RR | 186 | 2014 | Paul M. Dorresteyn, Norbertus A. Ipenburg, Kathryn J. Murphy, Michelle Smit, Jonna K. van Vulpen, Inge Wegner, Inge Stegeman, and Wilko Grolman, <i>Rapid Systematic Review of Normal Audiometry Results as a Predictor for Benign Paroxysmal Positional Vertigo, Otolaryngology -- Head and Neck Surgery</i> June 2014 150: 919-924, doi:10.1177/0194599814527233 | none mentioned | 1 | 1 | 1 |
| RR | 187 | 2012 | KONNYU, K., KWOK, E., SKIDMORE, B., MOHER, D.. The effectiveness and safety of emergency department short stay units: a rapid review. <i>Open Medicine, North America</i> , 6, jan. 2012. Available at: <a href="http://www.openmedicine.ca/article/view/478/449">http://www.openmedicine.ca/article/view/478/449</a> .                                            | no protocol    | 1 | 1 | 1 |
| RR | 188 | 2015 | Butow, P., Price, M. A., Shaw, J. M., Turner, J., Clayton, J. M., Grimison, P., Rankin, N., and Kirsten, L. (2015) Clinical pathway for the screening, assessment and management of anxiety and depression in adult cancer patients: Australian guidelines. <i>Psycho-Oncology</i> , 24: 987-1001. doi: 10.1002/pon.3920.                                          | no protocol    | 1 | 1 | 1 |
| RR | 189 | 2014 | R.B. Costello, C.V. Lentino, C.C. Boyd, M.L. O'Connell, C.C. Crawford, M.L. Sprengel, et al., The effectiveness of melatonin for promoting healthy sleep: a rapid evidence assessment of the literature, <i>Nutr. J.</i> , 13 (2014), p. 106 DOI: 10.1186/1475-2891-13-106                                                                                         | not published  | 1 | 0 | 1 |
| RR | 190 | 2014 | Lee, C., Crawford, C., & Swann, S. (2014). Multimodal, integrative therapies for the self-management of chronic pain symptoms. <i>Pain Medicine (Malden, Mass.)</i> , 15 Suppl 1S76-S85. doi:10.1111/pme.12408                                                                                                                                                     | yes            | 1 | 0 | 1 |

**Rapid reviews (CRD databases)**

|        |     |      |                                                                                                                                                                                                                                                                                                                                                |                |   |   |   |
|--------|-----|------|------------------------------------------------------------------------------------------------------------------------------------------------------------------------------------------------------------------------------------------------------------------------------------------------------------------------------------------------|----------------|---|---|---|
| CRD RR | 191 | 2015 | Health Quality Ontario. Prophylactic antibiotics for individuals with chronic obstructive pulmonary disease (COPD): a rapid review. Health Quality Ontario; 2015 February. 26 p. Available from: <a href="http://www.hqontario.ca/evidence/evidence-process/episodes-of-">http://www.hqontario.ca/evidence/evidence-process/episodes-of-</a>   | none mentioned | 1 | 0 | 1 |
| CRD RR | 192 | 2013 | Ghazipura M. Community versus inpatient rehabilitation in hip fracture patients: a rapid review. Toronto, Ontario; 2013 Apr. 23 p. Available from: <a href="http://www.hqontario.ca/evidence/publications-and-ohtac-recommendations/rapid-reviews">http://www.hqontario.ca/evidence/publications-and-ohtac-recommendations/rapid-reviews</a> . | none mentioned | 1 | 0 | 0 |
| CRD RR | 193 | 2015 | Health Quality Ontario. Sodium restriction in heart failure: a rapid review. Toronto: Health Quality Ontario; 2015 February. 20 p. Available from: <a href="http://www.hqontario.ca/evidence/evidence-process/episodes-of-care#community-chf">http://www.hqontario.ca/evidence/evidence-process/episodes-of-care#community-chf</a>             | none mentioned | 1 | 0 | 1 |
| CRD RR | 194 | 2014 | Lambrinos, A. Preoperative consultations: a rapid review. Toronto: Health Quality Ontario; 2014 March. 19 p. Available from: <a href="http://www.hqontario.ca/evidence/evidence-process/appropriateness-initiative#preop-consult">http://www.hqontario.ca/evidence/evidence-process/appropriateness-initiative#preop-consult</a> .             | none mentioned | 1 | 0 | 1 |



Tabelle1

1  
2  
3  
4  
5  
6  
7  
8  
9  
10  
11  
12  
13  
14  
15  
16  
17  
18  
19  
20  
21  
22  
23  
24  
25  
26  
27  
28  
29  
30  
31  
32  
33  
34  
35  
36  
37  
38  
39  
40  
41  
42  
43  
44  
45  
46

|   |   |   |   |   |   |   |   |   |    |   |                                                                                     |   |
|---|---|---|---|---|---|---|---|---|----|---|-------------------------------------------------------------------------------------|---|
| 0 | 0 | 1 | 0 | 0 | 0 | 0 | 0 | 0 | 3  | 0 | not found                                                                           |   |
| 0 | 0 | 1 | 1 | 1 | 0 | 0 | 1 | 7 | 1  | 1 | not found<br>na (no<br>rating tool<br>available<br>for this type<br>of<br>document) |   |
| 1 | 0 | 1 | 1 | 1 | 1 | 1 | 0 | 1 | 9  | 2 |                                                                                     | 9 |
| 0 | 0 | 0 | 0 | 0 | 0 | 0 | 0 | 0 | 3  | 0 | not found                                                                           | 3 |
| 0 | 0 | 1 | 0 | 0 | 1 | 0 | 1 | 5 | 1  | 1 | not found                                                                           | 5 |
| 0 | 0 | 1 | 1 | 1 | 0 | 1 | 1 | 7 | 1  | 1 | not found                                                                           | 7 |
|   |   |   |   |   |   |   |   | 4 |    |   |                                                                                     | 7 |
| 1 | 1 | 1 | 1 | 1 | 1 | 1 | 1 | 1 | 10 | 2 | not found                                                                           |   |
| 0 | 0 | 1 | 1 | 1 | 1 | 1 | 1 | 6 | 1  | 1 | not found                                                                           |   |
| 1 | 0 | 1 | 1 | 1 | 1 | 1 | 1 | 9 | 2  | 1 | not found                                                                           |   |
| 0 | 0 | 1 | 1 | 1 | 1 | 1 | 1 | 8 | 2  | 1 | not found                                                                           |   |

Tabelle1

|    |        |     |      |                                                                                                                                                                                             |                |   |   |  |   |
|----|--------|-----|------|---------------------------------------------------------------------------------------------------------------------------------------------------------------------------------------------|----------------|---|---|--|---|
| 1  |        |     |      |                                                                                                                                                                                             |                |   |   |  |   |
| 2  |        |     |      |                                                                                                                                                                                             |                |   |   |  |   |
| 3  |        |     |      |                                                                                                                                                                                             |                |   |   |  |   |
| 4  |        |     |      | Ling D. Role of screening for respiratory syncytial virus or influenza and empirical                                                                                                        |                |   |   |  |   |
| 5  |        |     |      | antiviral treatment for patients with community-acquired pneumonia: a rapid review.                                                                                                         | none           |   |   |  |   |
| 6  | CRD RR | 195 | 2013 | Toronto, ON: Health Quality Ontario; 2013 November. 17 p. Available from: <a href="http://www.h">http://www.h</a>                                                                           | mentioned      | 1 | 0 |  | 1 |
| 7  |        |     |      |                                                                                                                                                                                             |                |   |   |  |   |
| 8  |        |     |      |                                                                                                                                                                                             |                |   |   |  |   |
| 9  |        |     |      |                                                                                                                                                                                             |                |   |   |  |   |
| 10 |        |     |      | Health Quality Ontario. Communication of discharge instructions: a rapid review.                                                                                                            |                |   |   |  |   |
| 11 |        |     |      | Toronto: Health Quality Ontario; 2015 February. 18 p. Available from:                                                                                                                       | none           |   |   |  |   |
| 12 | CRD RR | 196 | 2015 | <a href="http://www.hqontario.ca/evidence/evidence-process/episodes-of-care#community-chf">http://www.hqontario.ca/evidence/evidence-process/episodes-of-care#community-chf</a> .           | mentioned      | 1 | 0 |  | 1 |
| 13 |        |     |      | Ghazipura M. Optimal Timing for Antibiotic Administration in Patients with Community-                                                                                                       |                |   |   |  |   |
| 14 |        |     |      | Acquired Pneumonia. Toronto, ON: Health Quality Ontario; 2013 November. 23 p.                                                                                                               |                |   |   |  |   |
| 15 | CRD RR | 197 | 2013 | Available from: <a href="http://www.hqontario.ca/evidence/publications-and-ohtac-recommendations/rapi">http://www.hqontario.ca/evidence/publications-and-ohtac-recommendations/rapi</a>     | none mentioned | 1 | 0 |  | 1 |
| 16 |        |     |      |                                                                                                                                                                                             |                |   |   |  |   |
| 17 |        |     |      |                                                                                                                                                                                             |                |   |   |  |   |
| 18 |        |     |      |                                                                                                                                                                                             |                |   |   |  |   |
| 19 |        |     |      | McCurdy BR. Action plans for individuals with chronic obstructive pulmonary disease                                                                                                         |                |   |   |  |   |
| 20 |        |     |      | (COPD): a rapid review. Toronto, ON: Health Quality Ontario; 2013 Jan. 20 p. Available                                                                                                      | none           |   |   |  |   |
| 21 | CRD RR | 198 | 2013 | from: <a href="http://www.hqontario.ca/evidence/publications-and-ohtac-recommendations/rapid-review">www.hqontario.ca/evidence/publications-and-ohtac-recommendations/rapid-review</a>      | mentioned      | 1 | 0 |  | 1 |
| 22 |        |     |      |                                                                                                                                                                                             |                |   |   |  |   |
| 23 |        |     |      | Wang M. Pulmonary rehabilitation in the home versus other settings for individuals with                                                                                                     |                |   |   |  |   |
| 24 |        |     |      | chronic obstructive pulmonary disease (COPD): a rapid review. Toronto: Health Quality                                                                                                       | none           |   |   |  |   |
| 25 | CRD RR | 199 | 2015 | Ontario; 2015 February. 23 p. Available from: <a href="http://www.hqontario.ca/evidence/ev">http://www.hqontario.ca/evidence/ev</a>                                                         | mentioned      | 1 | 0 |  | 1 |
| 26 |        |     |      | Bungay, H., & Vella-Burrows, T. (2013). The effects of participating in creative                                                                                                            |                |   |   |  |   |
| 27 |        |     |      | activities on the health and well-being of children and young people: A rapid review of                                                                                                     | none           |   |   |  |   |
| 28 | CRD RR | 200 | 2013 | the literature. Perspectives in Public Health, 133(1), 44–52.                                                                                                                               | mentioned      | 1 | 0 |  | 1 |
| 29 |        |     |      | Lambrinos A. Home-based exercise programs in heart failure: a rapid review. Toronto:                                                                                                        |                |   |   |  |   |
| 30 |        |     |      | Health Quality Ontario; 2015 February. 21 p. Available from:                                                                                                                                | none           |   |   |  |   |
| 31 | CRD RR | 201 | 2015 | <a href="http://www.hqontario.ca/evidence/evidence-process/episodes-of-care#community-chf">http://www.hqontario.ca/evidence/evidence-process/episodes-of-care#community-chf</a> .           | mentioned      | 1 | 0 |  | 1 |
| 32 |        |     |      |                                                                                                                                                                                             |                |   |   |  |   |
| 33 |        |     |      |                                                                                                                                                                                             |                |   |   |  |   |
| 34 |        |     |      | Health Quality Ontario. Home-based versus centre-based rehabilitation for community-                                                                                                        |                |   |   |  |   |
| 35 |        |     |      | dwelling postacute stroke patients: an economic rapid review. Toronto: Health Quality                                                                                                       | none           |   |   |  |   |
| 36 | CRD RR | 202 | 2015 | Ontario; 2015 February. 23 p. Available from: <a href="http://www.hqontario.ca/evidence/eviden">http://www.hqontario.ca/evidence/eviden</a>                                                 | mentioned      | 1 | 0 |  | 1 |
| 37 |        |     |      | Nikitovic M. Intensity of rehabilitation after hip fracture: a rapid review. Toronto, ON:                                                                                                   |                |   |   |  |   |
| 38 |        |     |      | Health Quality Ontario; 2013 Apr. 17 p. Available from:                                                                                                                                     |                |   |   |  |   |
| 39 | CRD RR | 203 | 2013 | <a href="http://www.hqontario.ca/evidence/publications-and-ohtac-recommendations/rapid-reviews">http://www.hqontario.ca/evidence/publications-and-ohtac-recommendations/rapid-reviews</a> . | none mentioned | 1 | 0 |  | 1 |
| 40 |        |     |      |                                                                                                                                                                                             |                |   |   |  |   |

Tabelle1

|    |   |   |    |    |    |    |   |   |   |   |               |
|----|---|---|----|----|----|----|---|---|---|---|---------------|
| 1  | 1 | 0 | na | na | na | na | 1 | 1 | 5 | 1 | not found     |
| 2  |   |   |    |    |    |    |   |   |   |   | na (no        |
| 3  |   |   |    |    |    |    |   |   |   |   | rating tool   |
| 4  |   |   |    |    |    |    |   |   |   |   | available     |
| 5  |   |   |    |    |    |    |   |   |   |   | for this type |
| 6  | 1 | 0 | na | na | na | na | 1 | 1 | 5 | 1 | of            |
| 7  |   |   |    |    |    |    |   |   |   |   | document)     |
| 8  |   |   |    |    |    |    |   |   |   |   |               |
| 9  |   |   |    |    |    |    |   |   |   |   |               |
| 10 |   |   |    |    |    |    |   |   |   |   |               |
| 11 | 1 | 0 | na | na | na | na | 1 | 1 | 5 | 1 |               |
| 12 |   |   |    |    |    |    |   |   |   |   |               |
| 13 |   |   |    |    |    |    |   |   |   |   |               |
| 14 |   |   |    |    |    |    |   |   |   |   |               |
| 15 | 1 | 0 | 0  | 0  | 1  | 1  | 1 | 1 | 8 | 1 | not found     |
| 16 |   |   |    |    |    |    |   |   |   |   | na (no        |
| 17 |   |   |    |    |    |    |   |   |   |   | rating tool   |
| 18 |   |   |    |    |    |    |   |   |   |   | available     |
| 19 |   |   |    |    |    |    |   |   |   |   | for this type |
| 20 |   |   |    |    |    |    |   |   |   |   | of            |
| 21 | 1 | 0 | 1  | 1  | 1  | na | 1 | 1 | 8 | 2 | document)     |
| 22 |   |   |    |    |    |    |   |   |   |   |               |
| 23 |   |   |    |    |    |    |   |   |   |   |               |
| 24 | 1 | 0 | 0  | 0  | 1  | 1  | 1 | 1 | 8 | 2 | not found     |
| 25 |   |   |    |    |    |    |   |   |   |   |               |
| 26 |   |   |    |    |    |    |   |   |   |   | 6             |
| 27 | 1 | 0 | 1  | 1  | 1  | 1  | 1 | 1 | 8 | 2 | (moderate)    |
| 28 |   |   |    |    |    |    |   |   |   |   |               |
| 29 |   |   |    |    |    |    |   |   |   |   |               |
| 30 | 1 | 0 | 1  | 1  | 1  | 1  | 1 | 1 | 9 | 2 | not found     |
| 31 |   |   |    |    |    |    |   |   |   |   | na (no        |
| 32 |   |   |    |    |    |    |   |   |   |   | rating tool   |
| 33 |   |   |    |    |    |    |   |   |   |   | available     |
| 34 |   |   |    |    |    |    |   |   |   |   | for this type |
| 35 |   |   |    |    |    |    |   |   |   |   | of            |
| 36 | 1 | 0 | 0  | 0  | 0  | 0  | 1 | 1 | 5 | 1 | document)     |
| 37 |   |   |    |    |    |    |   |   |   |   |               |
| 38 |   |   |    |    |    |    |   |   |   |   |               |
| 39 | 1 | 0 | na | na | na | na | 1 | 1 | 5 | 1 | not found     |
| 40 |   |   |    |    |    |    |   |   |   |   |               |

Tabelle1

|    |        |     |      |                                                                                                                                                                                             |           |   |   |   |
|----|--------|-----|------|---------------------------------------------------------------------------------------------------------------------------------------------------------------------------------------------|-----------|---|---|---|
| 1  |        |     |      |                                                                                                                                                                                             |           |   |   |   |
| 2  |        |     |      |                                                                                                                                                                                             |           |   |   |   |
| 3  |        |     |      |                                                                                                                                                                                             |           |   |   |   |
| 4  |        |     |      |                                                                                                                                                                                             |           |   |   |   |
| 5  |        |     |      | Self-management and educational interventions in the postacute stroke population: a rapid review. Toronto, ON: Health Quality Ontario; 2015 February. 23 p. Available from:                 | none      |   |   |   |
| 6  | CRD RR | 204 | 2015 | <a href="http://www.hqontario.ca/evidence/evidence-process/episodes-of-care#community-strok">http://www.hqontario.ca/evidence/evidence-process/episodes-of-care#community-strok</a>         | mentioned | 1 | 0 | 1 |
| 7  |        |     |      |                                                                                                                                                                                             |           |   |   |   |
| 8  |        |     |      | Health Quality Ontario. Criteria for referral to home care: a rapid review. Toronto: Health Quality Ontario; 2015 February. 20 p. Available from:                                           | none      |   |   |   |
| 9  | CRD RR | 205 | 2015 | <a href="http://www.hqontario.ca/evidence/evidence-process/episodes-of-care#community-chf">http://www.hqontario.ca/evidence/evidence-process/episodes-of-care#community-chf</a>             | mentioned | 1 | 0 | 1 |
| 10 |        |     |      |                                                                                                                                                                                             |           |   |   |   |
| 11 |        |     |      |                                                                                                                                                                                             |           |   |   |   |
| 12 |        |     |      |                                                                                                                                                                                             |           |   |   |   |
| 13 |        |     |      |                                                                                                                                                                                             |           |   |   |   |
| 14 |        |     |      | Baidoobonso S. Effect of supportive interventions on informal caregivers of people at the end of life: a rapid review. Toronto: Health Quality Ontario; 2014 December. 25 p.                | none      |   |   |   |
| 15 | CRD RR | 206 | 2014 | Available from: <a href="http://www.hqontario.ca/evidence/publications-and-ohtac-recommenda">http://www.hqontario.ca/evidence/publications-and-ohtac-recommenda</a>                         | mentioned | 1 | 0 | 0 |
| 16 |        |     |      |                                                                                                                                                                                             |           |   |   |   |
| 17 |        |     |      |                                                                                                                                                                                             |           |   |   |   |
| 18 |        |     |      |                                                                                                                                                                                             |           |   |   |   |
| 19 |        |     |      |                                                                                                                                                                                             |           |   |   |   |
| 20 |        |     |      | Miani C, Ball S, Pitchforth E, Exley J, King S, Roland M, et al. Organisational interventions to reduce length of stay in hospital: a rapid evidence assessment. Health                     |           |   |   |   |
| 21 | CRD RR | 207 | 2014 | Serv Deliv Res 2014;2(52). DOI: 10.3310/hsdr02520                                                                                                                                           | yes       | 1 | 1 | 1 |
| 22 |        |     |      |                                                                                                                                                                                             |           |   |   |   |
| 23 |        |     |      | Wang M. Airway clearance techniques for patients with stable chronic obstructive pulmonary disease (COPD): a rapid review. Toronto: Health Quality Ontario; 2015                            |           |   |   |   |
| 24 | CRD RR | 208 | 2015 | February. 23 p. Available from: <a href="http://www.hqontario.ca/evidence/evidence-process/episodes-of-">http://www.hqontario.ca/evidence/evidence-</a>                                     | none      | 1 | 0 | 1 |
| 25 |        |     |      |                                                                                                                                                                                             | mentioned |   |   |   |
| 26 |        |     |      |                                                                                                                                                                                             |           |   |   |   |
| 27 |        |     |      | Health Quality Ontario. Exercise programs after pulmonary rehabilitation for patients with chronic obstructive pulmonary disease (COPD). Toronto: Health Quality Ontario;                   | none      |   |   |   |
| 28 | CRD RR | 209 | 2015 | 2015 February. 20 p. Available from: <a href="http://www.hqontario.ca/evidence/evidence-proces">http://www.hqontario.ca/evidence/evidence-proces</a>                                        | mentioned | 1 | 0 | 1 |
| 29 |        |     |      |                                                                                                                                                                                             |           |   |   |   |
| 30 |        |     |      | Health Quality Ontario. Respiratory services in home care for individuals with chronic obstructive pulmonary disease (COPD): a rapid review. Toronto: Health Quality Ontario;               | none      |   |   |   |
| 31 | CRD RR | 210 | 2015 | 2015 February. 20 p. Available from: <a href="http://www.hqontario.ca/evidence/evidence-pr">http://www.hqontario.ca/evidence/evidence-pr</a>                                                | mentioned | 1 | 0 | 1 |
| 32 |        |     |      |                                                                                                                                                                                             |           |   |   |   |
| 33 |        |     |      | Brener S. Optimal timing to begin an active rehabilitation program after a hip fracture: a rapid review. Toronto, ON: Health Quality Ontario; 2013 Apr. 20 p. Available from:               | none      |   |   |   |
| 34 | CRD RR | 211 | 2013 | <a href="http://www.hqontario.ca/evidence/publications-and-ohtac-recommendations/rapid-re">http://www.hqontario.ca/evidence/publications-and-ohtac-recommendations/rapid-re</a>             | mentioned | 1 | 0 | 1 |
| 35 |        |     |      |                                                                                                                                                                                             |           |   |   |   |
| 36 |        |     |      | Schaik A. The effectiveness of statins for primary prevention: a rapid review. Toronto, ON: Health Quality Ontario; 2013 Feb. 23 p. Available from:                                         |           |   |   |   |
| 37 | CRD RR | 212 | 2013 | <a href="http://www.hqontario.ca/evidence/publications-and-ohtac-recommendations/rapid-reviews">http://www.hqontario.ca/evidence/publications-and-ohtac-recommendations/rapid-reviews</a> . | none      | 1 | 0 | 1 |
| 38 |        |     |      |                                                                                                                                                                                             | mentioned |   |   |   |

Tabelle1

|    |   |   |   |   |      |   |   |   |    |   |           |  |
|----|---|---|---|---|------|---|---|---|----|---|-----------|--|
| 1  |   |   |   |   |      |   |   |   |    |   |           |  |
| 2  |   |   |   |   |      |   |   |   |    |   |           |  |
| 3  |   |   |   |   |      |   |   |   |    |   |           |  |
| 4  |   |   |   |   |      |   |   |   |    |   |           |  |
| 5  |   |   |   |   |      |   |   |   |    |   |           |  |
| 6  | 1 | 0 | 0 | 1 | 1    | 0 | 1 | 1 | 7  | 1 | not found |  |
| 7  |   |   |   |   |      |   |   |   |    |   |           |  |
| 8  |   |   |   |   |      |   |   |   |    |   |           |  |
| 9  | 1 | 0 | 1 | 1 | 1    | 0 | 1 | 1 | 8  | 2 | not found |  |
| 10 |   |   |   |   |      |   |   |   |    |   |           |  |
| 11 |   |   |   |   |      |   |   |   |    |   |           |  |
| 12 |   |   |   |   |      |   |   |   |    |   |           |  |
| 13 |   |   |   |   |      |   |   |   |    |   |           |  |
| 14 |   |   |   |   |      |   |   |   |    |   |           |  |
| 15 | 0 | 0 | 1 | 1 | 1    | 0 | 1 | 1 | 6  | 1 | not found |  |
| 16 |   |   |   |   |      |   |   |   |    |   |           |  |
| 17 |   |   |   |   |      |   |   |   |    |   |           |  |
| 18 |   |   |   |   |      |   |   |   |    |   |           |  |
| 19 |   |   |   |   |      |   |   |   |    |   |           |  |
| 20 | 1 | 1 | 1 | 1 | 1    | 1 | 1 | 1 | 11 | 2 | not found |  |
| 21 |   |   |   |   |      |   |   |   |    |   |           |  |
| 22 |   |   |   |   |      |   |   |   |    |   |           |  |
| 23 |   |   |   |   |      |   |   |   |    |   |           |  |
| 24 | 1 | 0 | 1 | 1 | 1    | 0 | 1 | 1 | 8  | 2 | not found |  |
| 25 |   |   |   |   |      |   |   |   |    |   |           |  |
| 26 |   |   |   |   |      |   |   |   |    |   |           |  |
| 27 | 1 | 0 | 0 | 1 | 1    | 0 | 1 | 1 | 7  | 1 | not found |  |
| 28 |   |   |   |   |      |   |   |   |    |   |           |  |
| 29 |   |   |   |   |      |   |   |   |    |   |           |  |
| 30 | 1 | 0 | 1 | 1 | 1    | 0 | 1 | 1 | 8  | 2 | not found |  |
| 31 |   |   |   |   |      |   |   |   |    |   |           |  |
| 32 |   |   |   |   |      |   |   |   |    |   |           |  |
| 33 | 1 | 0 | 1 | 1 | 1 na |   | 1 | 1 | 8  | 2 | not found |  |
| 34 |   |   |   |   |      |   |   |   |    |   |           |  |
| 35 |   |   |   |   |      |   |   |   |    |   |           |  |
| 36 |   |   |   |   |      |   |   |   |    |   |           |  |
| 37 | 1 | 0 | 1 | 1 | 1    | 1 | 1 | 1 | 9  | 2 | not found |  |
| 38 |   |   |   |   |      |   |   |   |    |   |           |  |
| 39 |   |   |   |   |      |   |   |   |    |   |           |  |
| 40 |   |   |   |   |      |   |   |   |    |   |           |  |
| 41 |   |   |   |   |      |   |   |   |    |   |           |  |
| 42 |   |   |   |   |      |   |   |   |    |   |           |  |
| 43 |   |   |   |   |      |   |   |   |    |   |           |  |
| 44 |   |   |   |   |      |   |   |   |    |   |           |  |
| 45 |   |   |   |   |      |   |   |   |    |   |           |  |
| 46 |   |   |   |   |      |   |   |   |    |   |           |  |

Tabelle1

|        |     |      |                                                                                                                                                                                                                                                                                                                                                                                                                     |                |   |   |   |
|--------|-----|------|---------------------------------------------------------------------------------------------------------------------------------------------------------------------------------------------------------------------------------------------------------------------------------------------------------------------------------------------------------------------------------------------------------------------|----------------|---|---|---|
| CRD RR | 213 | 2015 | Health Quality Ontario. Physical activity counselling: a rapid review. Toronto: Health Quality Ontario; 2015 February. 20 p. Available from: <a href="http://www.hqontario.ca/evidence/evidence-process/episodes-of-care#community-chf">http://www.hqontario.ca/evidence/evidence-process/episodes-of-care#community-chf</a> .                                                                                      | none mentioned | 1 | 0 | 1 |
| CRD RR | 214 | 2015 | Health Quality Ontario. Cognitive-behavioural therapy for anxiety and depression in patients with COPD: a rapid review. Toronto: Health Quality Ontario; 2015 February. 21 p. Available from: <a href="http://www.hqontario.ca/evidence/evidence-process/episodes-of-care#community-chf">http://www.hqontario.ca/evidence/evidence-process/episodes-of-care#community-chf</a> .                                     | none mentioned | 1 | 0 | 1 |
| CRD RR | 215 | 2015 | Ghazipura M. Cardiovascular and aerobic exercise in postacute stroke patients: a rapid review. Toronto, ON: Health Quality Ontario; 2015 February. 17 p. Available from: <a href="http://www.hqontario.ca/evidence/evidence-process/episodes-of-care#community-stroke">http://www.hqontario.ca/evidence/evidence-process/episodes-of-care#community-stroke</a> .                                                    | none mentioned | 1 | 0 | 1 |
| CRD RR | 216 | 2015 | Health Quality Ontario. Aerobic exercise training in patients with heart failure: a rapid review. Toronto: Health Quality Ontario; 2015 February. 19 p. Available from: <a href="http://www.hqontario.ca/evidence/evidence-process/episodes-of-care#community-chf">http://www.hqontario.ca/evidence/evidence-process/episodes-of-care#community-chf</a> .                                                           | none mentioned | 1 | 0 | 1 |
| CRD RR | 217 | 2015 | Health Quality Ontario. Care coordination for postacute stroke, chronic obstructive pulmonary disease, and heart failure clients: an economic rapid review. Toronto: Health Quality Ontario; 2015 February. 20 p. Available from: <a href="http://www.hqontario.ca/evidence/evidence-process/episodes-of-care#community-chf">http://www.hqontario.ca/evidence/evidence-process/episodes-of-care#community-chf</a> . | none mentioned | 1 | 0 | 1 |
| CRD RR | 218 | 2015 | Lambrinos A. Medication reconciliation at discharge: a rapid review. Toronto: Health Quality Ontario; 2015 February. 24 p. Available from: <a href="http://www.hqontario.ca/evidence/evidence-process/episodes-of-care#community-chf">http://www.hqontario.ca/evidence/evidence-process/episodes-of-care#community-chf</a> .                                                                                        | none mentioned | 1 | 0 | 1 |
| CRD RR | 219 | 2013 | McCurdy BR. Inhospital physiotherapy for acute exacerbations of chronic obstructive pulmonary disease (AECOPD): a rapid review. Toronto, ON: Health Quality Ontario; 2012 Dec. 28 p. Available from: <a href="http://www.hqontario.ca/evidence/publications-and-oh-tac-recommend">www.hqontario.ca/evidence/publications-and-oh-tac-recommend</a>                                                                   | none mentioned | 1 | 0 | 1 |
| CRD RR | 220 | 2013 | Health Quality Ontario. Effectiveness and safety of thrombolytics for ischemic stroke: a rapid review. Toronto, ON: Health Quality Ontario; 2013 Jan. 25 p. Available from: <a href="http://www.hqontario.ca/evidence/publications-and-oh-tac-recommendations/rapid-reviews">http://www.hqontario.ca/evidence/publications-and-oh-tac-recommendations/rapid-reviews</a>                                             | none mentioned | 1 | 0 | 1 |

Tabelle1

|    |   |      |    |    |    |   |   |   |   |   |                                                         |  |
|----|---|------|----|----|----|---|---|---|---|---|---------------------------------------------------------|--|
| 1  |   |      |    |    |    |   |   |   |   |   |                                                         |  |
| 2  |   |      |    |    |    |   |   |   |   |   |                                                         |  |
| 3  |   |      |    |    |    |   |   |   |   |   |                                                         |  |
| 4  |   |      |    |    |    |   |   |   |   |   |                                                         |  |
| 5  |   |      |    |    |    |   |   |   |   |   |                                                         |  |
| 6  | 1 | 0    | 1  | 1  | 1  | 0 | 1 | 1 | 8 | 2 | not found                                               |  |
| 7  |   |      |    |    |    |   |   |   |   |   |                                                         |  |
| 8  |   |      |    |    |    |   |   |   |   |   |                                                         |  |
| 9  | 1 | 0    | 0  | 1  | 1  | 1 | 1 | 1 | 8 | 2 | not found                                               |  |
| 10 |   |      |    |    |    |   |   |   |   |   |                                                         |  |
| 11 |   |      |    |    |    |   |   |   |   |   |                                                         |  |
| 12 | 1 | 0    | 1  | 1  | 1  | 1 | 1 | 1 | 9 | 2 | not found                                               |  |
| 13 |   |      |    |    |    |   |   |   |   |   |                                                         |  |
| 14 |   |      |    |    |    |   |   |   |   |   |                                                         |  |
| 15 |   |      |    |    |    |   |   |   |   |   |                                                         |  |
| 16 | 1 | 0    | 1  | 1  | 1  | 1 | 1 | 1 | 9 | 2 | not found                                               |  |
| 17 |   |      |    |    |    |   |   |   |   |   |                                                         |  |
| 18 |   |      |    |    |    |   |   |   |   |   |                                                         |  |
| 19 |   |      |    |    |    |   |   |   |   |   |                                                         |  |
| 20 |   |      |    |    |    |   |   |   |   |   |                                                         |  |
| 21 |   |      |    |    |    |   |   |   |   |   |                                                         |  |
| 22 | 1 | 0 na | na | na | na |   | 1 | 1 | 5 | 1 | na (no rating tool available for this type of document) |  |
| 23 |   |      |    |    |    |   |   |   |   |   |                                                         |  |
| 24 |   |      |    |    |    |   |   |   |   |   |                                                         |  |
| 25 | 1 | 0    | 1  | 1  | 1  | 1 | 1 | 1 | 9 | 2 | not found                                               |  |
| 26 |   |      |    |    |    |   |   |   |   |   |                                                         |  |
| 27 |   |      |    |    |    |   |   |   |   |   |                                                         |  |
| 28 |   |      |    |    |    |   |   |   |   |   |                                                         |  |
| 29 | 1 | 0    | 0  | 1  | 0  | 1 | 1 | 1 | 7 | 1 | not found                                               |  |
| 30 |   |      |    |    |    |   |   |   |   |   |                                                         |  |
| 31 |   |      |    |    |    |   |   |   |   |   |                                                         |  |
| 32 | 1 | 0    | 1  | 1  | 1  | 1 | 1 | 1 | 9 | 2 | not found                                               |  |

median amstar: 8



Characteristics of stakeholder involvement in systematic and rapid reviews: Study characteristics

General Information

| Study type                     | Study ID | Year of study | version number | Citation                                                                                                                                                                                                                                                        | Institution performing review                                                                                                              | country | year | contact details, corresponding author (not shown) | specific topic                               | Thematic Focus | Type of intervention       | Setting specified                     | Setting            |
|--------------------------------|----------|---------------|----------------|-----------------------------------------------------------------------------------------------------------------------------------------------------------------------------------------------------------------------------------------------------------------|--------------------------------------------------------------------------------------------------------------------------------------------|---------|------|---------------------------------------------------|----------------------------------------------|----------------|----------------------------|---------------------------------------|--------------------|
| 15 Cochrane systematic reviews |          |               |                |                                                                                                                                                                                                                                                                 |                                                                                                                                            |         |      |                                                   |                                              |                |                            |                                       |                    |
| CSR                            | 101      | 2012          | 1              | Olsen O, Clausen JA. Planned hospital birth versus planned home birth. Cochrane Database of Systematic Reviews 2012, Issue 9. Art. No.: CD000352. DOI: 10.1002/14651858.CD000352.pub2.                                                                          | General Practice and Section of General Practice, Department of Public Health, University of                                               | DNK     | 2012 |                                                   | childbirth                                   | Treatment      | Type of birth              | birth setting hospital/home           | Multiple           |
| CSR                            | 102      | 2013          | 1              | Moi JHY, Sriranganathan MK, Edwards CJ, Buchbinder R. Lifestyle interventions for acute gout. Cochrane Database of Systematic Reviews 2013, Issue 11. Art. No.: CD010519. DOI: 10.1002/14651858.CD010519.pub2.                                                  | Department of Rheumatology, The Royal Melbourne Hospital, Parkville, Australia.                                                            | AUS     | 2013 |                                                   | Acute gout treatment                         | Treatment      | lifestyle interventions    | inpatients and outpatients            | multiple           |
| CSR                            | 103      | 2011          | 1              | Thomas RE, Lorenzetti D, Spragins W. Mentoring adolescents to prevent drug and alcohol use. Cochrane Database of Systematic Reviews 2011, Issue 11. Art. No.: CD007381. DOI: 10.1002/14651858.CD007381.pub2.                                                    | University of Calgary, Department of Medicine, Calgary, Alberta, Canada                                                                    | CAN     | 2011 |                                                   | drug/alcohol prevention                      | Prevention     | mentoring acts of any kind | mentoring programs                    | Multiple           |
| CSR                            | 104      | 2012          | 1              | Garrison SR, Allan GM, Sekhon RK, Musini VM, Khan KM. Magnesium for skeletal muscle cramps. Cochrane Database of Systematic Reviews 2012, Issue 9. Art. No.: CD009402. DOI: 10.1002/14651858.CD009402.pub2.                                                     | University of British Columbia, Vancouver, BC, Canada                                                                                      | CAN     | 2012 |                                                   | Skeltal muscle cramps                        | Treatment      | Magnesium supplementation  | outpatients (primary care, community) | Outpatient         |
| CSR                            | 105      | 2012          | update         | Tejani AM, Wasdell M, Spiwak R, Rowell G, Nathwani S. Carnitine for fatigue in multiple sclerosis. Cochrane Database of Systematic Reviews 2012, Issue 5. Art. No.: CD007280. DOI: 10.1002/14651858.CD007280.pub3.                                              | University of British Columbia, Vancouver, BC, Canada                                                                                      | CAN     | 2012 |                                                   | Multiple Sclerosis fatigue                   | Treatment      | Carnitine supplementation  | outpatients                           | Outpatient         |
| CSR                            | 106      | 2013          | update         | Taylor F, Huffman MD, Macedo AF, Moore THM, Burke M, Davey Smith G, Ward K, Ebrahim S. Statins for the primary prevention of cardiovascular disease. Cochrane Database of Systematic Reviews 2013, Issue 1. Art. No.: CD004816. DOI: 10.1002/14651858.CD004816. | University of British Columbia, Vancouver, BC, Canada & Tropical Medicine, Department of Non-communicable Disease Epidemiology, London, UK | GBR     | 2013 |                                                   | primary prevention of cardiovascular disease | Prevention     | statins                    | community setting                     | Community          |
| CSR                            | 107      | 2013          | update         | Jorge EC, Jorge EN, El Dib RP. Early light reduction for preventing retinopathy of prematurity in very low birth weight infants. Cochrane Database of Systematic Reviews 2013, Issue 8. Art. No.: CD000122. DOI: 10.1002/14651858.CD000122.pub2.                | Botucatu Medical School, Universidade Estadual Paulista (UNESP), Botucatu, São Paulo, Brazil                                               | BRA     | 2013 |                                                   | ROP prevention in premature infants          | Prevention     | light reduction            | hospital                              | Inpatient/Hospital |
| CSR                            | 108      | 2012          | 1              | Jin H, Leng Q, Li C. Dietary flavonoid for preventing colorectal neoplasms. Cochrane Database of Systematic Reviews 2012, Issue 8. Art. No.: CD009350. DOI: 10.1002/14651858.CD009350.pub2.                                                                     | University of Traditional Chinese Medicine, National Center of Colorectal Surgery, Nanjing, Jiangsu                                        | CHN     | 2012 |                                                   | colorectal neoplasm prevention               | Prevention     | Flavonoid intake           | community setting                     | Community          |

1  
2  
3  
4  
5  
6  
7  
8  
9  
10  
11  
12  
13  
14  
15  
16  
17  
18  
19  
20  
21  
22  
23  
24  
25  
26  
27  
28  
29  
30  
31  
32  
33  
34  
35  
36  
37  
38  
39  
40  
41  
42  
43  
44  
45  
46

**Stakeholder involvement SHI** **PRISMA**

**notable conflicts of interests of authors** **review protocol** **SHI: yes = 1, no = 0** **Procedure according to PRISMA-guidelines**

| Population               | N      | overall age range | sex | Funding (who?)                                                                                                                                                                                          | notable conflicts of interests of authors           | review protocol | SHI: yes = 1, no = 0 | Procedure according to PRISMA-guidelines |
|--------------------------|--------|-------------------|-----|---------------------------------------------------------------------------------------------------------------------------------------------------------------------------------------------------------|-----------------------------------------------------|-----------------|----------------------|------------------------------------------|
| Low risk pregnant women  | 11     | pregnant          | f   | governmental, institutional: National Institute for Health Research, UK.                                                                                                                                | none                                                | yes             |                      | 1                                        |
| adults with acute gout   | 19     | adult             | f/m | governmental, institutional                                                                                                                                                                             | none                                                | yes             |                      | 0                                        |
| adolescents              | 1994   | 13 - 18           | f/m | governmental, institutional                                                                                                                                                                             | none                                                | yes             |                      | 0                                        |
| adults                   | 406    | adult             | f/m | governmental, institutional: Canadian Institutes of Health Research                                                                                                                                     | and Khan are co-authors of a RCT which was included | yes             |                      | 0                                        |
| adults with MS diagnosed | 36     | adult             | f/m | institutional: Fraser Health Research Administration and Development Office, Department of Social Medicine, University of Bristol, UK., institutional: University of Rochester, NY, USA., Department of | none                                                | yes             |                      | 1                                        |
| adults                   | 56934  | adult             | f/m | institutional: University of Rochester, NY, USA., Department of                                                                                                                                         | none                                                | yes             |                      | 0                                        |
| Premature human infants  | 897    | premature         | f/m | institutional: University of Rochester, NY, USA., Department of                                                                                                                                         | served as a member of the Data Safety               | yes             |                      | 0                                        |
| adults                   | 390769 | adult             | f/m | governmental, institutional                                                                                                                                                                             | none                                                | yes             |                      | 0                                        |



|    |               |               |     |                         |                |     |   |
|----|---------------|---------------|-----|-------------------------|----------------|-----|---|
| 1  |               |               |     |                         |                |     |   |
| 2  | adults with   |               |     | institutional: National |                |     |   |
| 3  | past          |               |     | Institute for Health    |                |     |   |
| 4  | cardiovascul  | 2505 adult    | f/m | Research (NIHR)         | none           | yes | 0 |
| 5  | ar event      |               |     | programme grant,        |                |     |   |
| 6  |               |               |     | institutional: Centre   |                |     |   |
| 7  | adults        | 390769 adult  | f/m | for Clinical            | none           | yes | 0 |
| 8  |               |               |     | Intervention            |                |     |   |
| 9  |               |               |     | Research,               |                |     |   |
| 10 | adolescents   | 1139 < 19     | f/m | institutional: South    | none           | yes | 0 |
| 11 | antidepressa  |               |     | African Medical         |                |     |   |
| 12 | nt-induced    |               |     | Research Council,       | previously     |     |   |
| 13 | sexual        |               |     | South Africa., Open     | acted as a     |     |   |
| 14 | dysfunction   | 1886 adult    | f/m | Department of           | temporary      | yes | 0 |
| 15 | adults, low-  |               |     | Psychiatry, University  | consultant for |     |   |
| 16 | or middle-    |               |     | of Oxford, UK.,         |                |     |   |
| 17 | income        | 40309 adult   | f/m | institutional: World    |                |     |   |
| 18 | country       |               |     | Health Organization,    | none           | yes | 0 |
| 19 | children 0 -  |               |     | Department of           |                |     |   |
| 20 | 12            | 288 0 - 12    | f/m | HIV/AIDS,               | and MT work    |     |   |
| 21 |               |               |     |                         | for paediatric |     |   |
| 22 | patients > 13 |               |     | governmental,           | health         | yes | 1 |
| 23 | with NBS      |               |     | institutional           | facilities     |     |   |
| 24 | diagnosed     | 0 > 13        | f/m | institutional:          |                |     |   |
| 25 | HIV patients  |               |     | Fondazione              |                |     |   |
| 26 | with          |               |     | I.R.C.C.S. Istituto     | none           | yes | 0 |
| 27 | cryptococcal  | 337 adult     | f/m | Neurologico Carlo       |                |     |   |
| 28 | meningitis    |               |     | governmental,           |                |     |   |
| 29 | patients with |               |     | institutional:          |                |     |   |
| 30 | ischaemic/ha  |               |     | Cochrane HIV/AIDS       | none           | yes | 0 |
| 31 | emorrhagic    |               |     | Review Group, USA.      |                |     |   |
| 32 | stroke or TIA | 8021 adult    | f/m | institutional:          | has received   |     |   |
| 33 | diabetic      |               |     | Department of Health    | speaker fees   |     |   |
| 34 | peripheral    |               |     | Sciences, University    | for talks on   | yes | 0 |
| 35 | neuropathy    |               |     | of Leicester, UK.       | stroke from    |     |   |
| 36 | DPN           | 3639 s        | f/m | institutional: National |                |     |   |
| 37 | alcoholic     |               |     | Basic Research          |                |     |   |
| 38 | steatosis,    |               |     | Program of China,       |                |     |   |
| 39 | fibrosis,     |               |     | Centre for Evidence-    | none           | yes | 0 |
| 40 | hepatitis,    | 710 adult     | f/m | institutional: The      |                |     |   |
| 41 | healthy       |               |     | Copenhagen Trial        |                |     |   |
| 42 | children      | 300000 0 - 16 | f/m | Unit, Denmark., The     | none           | yes | 0 |
| 43 |               |               |     | Danish Medical          |                |     |   |
| 44 |               |               |     | institutional:          | Jefferson was  |     |   |
| 45 |               |               |     | REGIONE                 | an ad hoc      |     |   |
| 46 |               |               |     | PIEMONTE ASL 20         | consultant for |     |   |
|    |               |               |     | ALESSANDRIA,            | F. Hoffman-    | yes | 0 |



|    |               |         |             |     |                        |                  |          |  |   |
|----|---------------|---------|-------------|-----|------------------------|------------------|----------|--|---|
| 1  | consumers,    |         |             |     | institutional: State   | review           |          |  |   |
| 2  | health        |         |             |     | University of New      | authors were     |          |  |   |
| 3  | professionals |         |             |     | York at Buffalo, NY,   | also authors     |          |  |   |
| 4  | , policy      | 16342   | adult       | f/m | USA., Italian National | of one           | yes      |  | 0 |
| 5  | acquired (not |         |             |     | institutional: Primary |                  |          |  |   |
| 6  | familial)     |         |             |     | Healthcare Research    |                  |          |  |   |
| 7  | hypercholest  | 0       | adult       | f/m | Development            | none             | yes      |  | 0 |
| 8  | erolaemia     |         |             |     | institutional: The     |                  |          |  |   |
| 9  | patients with |         |             |     | University of Hong     |                  |          |  |   |
| 10 | hematologica  |         | no          |     | Kong, Hong Kong,       |                  |          |  |   |
| 11 | l             |         | restriction |     | Cochrane               | none             | yes      |  | 0 |
| 12 | malignancies  | 593     | s           | f/m | institutional: The     |                  |          |  |   |
| 13 | adults with   |         |             |     | Chinese University of  |                  |          |  |   |
| 14 | diagnosis of  |         |             |     | Hong Kong, Hong        |                  |          |  |   |
| 15 | acute or      | 0       | adult       | f/m | Kong.                  | none             | yes      |  | 0 |
| 16 | chronic CHD   |         |             |     | governmental,          |                  |          |  |   |
| 17 | patients with |         |             |     | institutional: Leiden  |                  |          |  |   |
| 18 | lumbar        | 733     | adult       | f/m | University Medical     | none             | yes      |  | 0 |
| 19 | stenosis      |         |             |     | Center, Netherlands.   |                  |          |  |   |
| 20 | adults with   |         |             |     | institutional:         | Carvajal was     |          |  |   |
| 21 | sickle cell   |         |             |     | Iberoamerican          | employed by      |          |  |   |
| 22 | disease       | 198     | adult       | f/m | Cochrane Center,       | Eli Lilly to run | yes      |  | 1 |
| 23 | patients with |         |             |     | Spain., Cystic         | a four-hour      |          |  |   |
| 24 | hepatic       |         |             |     | institutional:         |                  |          |  |   |
| 25 | encephalopa   |         |             |     | Copenhagen Trial       |                  |          |  |   |
| 26 | thy           | 144     | adult       | f/m | Unit, Denmark., The    | none             | yes      |  | 0 |
| 27 | patients with |         |             |     | 1991 Pharmacy          | contributed to   |          |  |   |
| 28 | irritable     |         |             |     | institutional:         | the design       |          |  |   |
| 29 | bowel         | 213     | adult       | f/m | University of Leeds,   | and              | yes      |  | 0 |
| 30 | syndrome      |         |             |     | UK., Homeopathy        | management       |          |  |   |
| 31 | and adults    |         |             |     | Research Institute,    |                  |          |  |   |
| 32 | with fever or | not     | no          |     | institutional: Centre  |                  |          |  |   |
| 33 | malaria       | mention | restriction |     | for Evidence-Based     |                  |          |  |   |
| 34 | symptoms      | ed      | s           | f/m | Health Care,           | none             | yes      |  | 0 |
| 35 |               |         |             |     | Stellenbosch           |                  |          |  |   |
| 36 | opium         |         |             |     | governmental,          |                  |          |  |   |
| 37 | dependend     |         |             |     | institutional: Tehran  |                  |          |  |   |
| 38 | adults        | 870     | adult       | f/m | University of Medical  | none             | yes      |  | 0 |
| 39 |               |         |             |     | Sciences, Iran.        |                  |          |  |   |
| 40 | patients with |         |             |     | institutional:         |                  |          |  |   |
| 41 | chronic heart |         |             |     | universities, British  | not              | none     |  |   |
| 42 | failure       | 136182  | adult       | f/m | Heart Foundation       | mentioned        | mentione |  | 0 |
| 43 |               |         |             |     | Project Grant,         |                  | d        |  | 0 |
| 44 |               |         |             |     |                        |                  |          |  |   |
| 45 |               |         |             |     |                        |                  |          |  |   |
| 46 |               |         |             |     |                        |                  |          |  |   |





|    |                |           |             |               |                         |           |            |   |   |
|----|----------------|-----------|-------------|---------------|-------------------------|-----------|------------|---|---|
| 1  |                |           |             |               |                         |           |            |   |   |
| 2  | patients       |           |             |               |                         |           |            |   |   |
| 3  | treated with   |           |             | governmental, |                         |           |            |   |   |
| 4  | face mask      | 936       | adult       | f/m           | institutional           | none      | yes        | 0 | 1 |
| 5  | covered by     |           |             |               |                         |           |            |   |   |
| 6  | private or     | not       | no          |               | governmental,           |           | yes (not   |   |   |
| 7  | public         | mention   | restriction | f/m           | institutional           | not       | mentioned) | 1 | 1 |
| 8  | insurance      | ed        | s           |               |                         | mentioned |            |   |   |
| 9  | patients with  |           |             |               |                         |           | none       |   |   |
| 10 | type 2         |           |             |               | governmental,           |           | mentione   |   |   |
| 11 | diabetes       | 23182     | adult       | f/m           | institutional           | none      | d          | 0 | 0 |
| 12 | diagnosed      |           |             |               |                         |           |            |   |   |
| 13 | with           |           |             |               |                         |           | none       |   |   |
| 14 | posttraumati   |           |             |               | governmental,           | not       | mentione   |   |   |
| 15 | c stress       | 354       | > 14        | f/m           | institutional           | mentioned | d          | 0 | 1 |
| 16 | individuals    |           |             |               | institutional: National |           | yes (not   |   |   |
| 17 | with BMI >     |           |             |               | Health andMedical       |           | mentioned) |   |   |
| 18 | 30             | 4650877   | adult       | f/m           | Australia               | none      |            | 1 | 1 |
| 19 | patients       |           |             |               |                         |           |            |   |   |
| 20 | suffering      |           |             |               | governmental,           | not       |            |   |   |
| 21 | from dyslexia  | 2726      | 6 to 36     | f/m           | institutional           | mentioned | no         | 0 | 1 |
| 22 |                |           |             |               | governmental,           |           | none       |   |   |
| 23 | Population     | not       | no          |               | institutional: National |           | mentione   |   |   |
| 24 | adults         | mentioned | restriction | f/m           | Cancer research         | not       | d          | 0 | 1 |
| 25 | receiving      |           |             |               | institute, UK           | mentioned |            |   |   |
| 26 | treatment for  | not       |             |               |                         |           |            |   |   |
| 27 | depression     | mentioned | adult       | f/m           | governmental,           | none      | yes        | 0 | 0 |
| 28 | women with     |           |             |               | institutional           |           |            |   |   |
| 29 | breast         |           |             |               |                         |           | none       |   |   |
| 30 | cancer         |           |             |               | governmental,           |           | mentione   |   |   |
| 31 | stages I - III | 207       | adult       | f             | institutional           | none      | d          | 0 | 1 |
| 32 | patients > 65  |           |             |               |                         |           | none       |   |   |
| 33 | discharged     |           |             |               | governmental,           | not       | mentione   |   |   |
| 34 | from hospital  | 8440      | > 65        | f/m           | institutional           | mentioned | d          | 0 | 0 |
| 35 |                |           |             |               | institutional,          |           |            |   |   |
| 36 | pregnant       |           | no          |               | supported by Tri-       |           | none       |   |   |
| 37 | women          | 2836410   | restriction | f             | Council for Nursing     | not       | mentione   | 0 | 0 |
| 38 | patients with  |           |             |               | and the Advanced        | mentioned | d          |   |   |
| 39 | low-risk       |           |             |               |                         |           |            |   |   |
| 40 | prostate       | not       |             |               | governmental,           |           | mentione   |   |   |
| 41 | cancer         | mentioned | adult       | m             | institutional           | none      | d          | 0 | 1 |



|    |                |           |             |     |                          |                |     |          |   |
|----|----------------|-----------|-------------|-----|--------------------------|----------------|-----|----------|---|
| 1  |                |           |             |     | institutional: Agency    |                |     |          |   |
| 2  |                |           |             |     | for Healthcare           |                |     |          |   |
| 3  |                | not       |             |     | Research and             |                |     | yes (not |   |
| 4  | children       | mentioned | children    | f/m | Quality, US              | none           |     | mentione |   |
| 5  |                |           |             |     |                          | has received   |     | d)       | 1 |
| 6  |                |           |             |     |                          | speaking       |     | d)       | 1 |
| 7  | adults         | 74536     | adult       | f/m | governmental,            | from           |     | d)       | 1 |
| 8  |                |           |             |     | institutional:           | the University |     |          | 1 |
| 9  |                |           | no          |     | University of Otago      | of Otago,      |     |          |   |
| 10 | Population     | 517844    | s           | f/m | and the Riddet           | Riddet         |     |          |   |
| 11 | patients with  |           | restriction |     | Institute, a New         | Institute, and | yes |          | 1 |
| 12 | primary        |           |             |     |                          |                |     |          |   |
| 13 | hypothyreosi   |           |             |     | governmental,            | not            |     | none     |   |
| 14 | s              | 1379      | 16 - 80     | f/m | institutional            | mentioned      |     | d)       | 0 |
| 15 | with           |           |             |     | institutional: Victorian |                |     |          | 1 |
| 16 | diagnosed      |           |             |     | Government's             |                |     |          |   |
| 17 | agenesis of    | 110       | 0 - 73      | f/m | Operational              | not            |     | none     |   |
| 18 | Corpus         |           |             |     | Infrastructure           | mentioned      |     | d)       | 0 |
| 19 | children and   |           |             |     | governmental,            |                |     |          |   |
| 20 | adolescents    | 4648420   | 0 - 18      | f/m | institutional: NIHR      | none           | yes |          | 0 |
| 21 | early- stage   |           |             |     | HTA Programme,           |                |     |          | 1 |
| 22 | breast         |           |             |     | institutional: Ministry  |                |     |          |   |
| 23 | cancer         |           |             |     | of Education, Culture,   |                |     | none     |   |
| 24 | patients       | 1159      | adult       | f   | Sports, Science and      | not            |     | mentione | 0 |
| 25 | (some          |           |             |     | Technology in Japan      | mentioned      |     | d)       | 1 |
| 26 | undernourish   |           |             |     |                          |                |     |          |   |
| 27 | ed, some       |           |             |     | governmental,            | not            |     | yes (not |   |
| 28 | well           | 2485      | > 59        | m/f | institutional            | mentioned      |     | mentione | 0 |
| 29 | people with    |           |             |     |                          |                |     | d)       | 0 |
| 30 | primary        |           |             |     |                          |                |     |          |   |
| 31 | cancer         |           |             |     | governmental,            | not            |     | yes (not |   |
| 32 | diagnosis      | 648       | adult       | m/f | institutional            | mentioned      |     | mentione | 0 |
| 33 | school,        |           |             |     |                          |                |     | d)       | 1 |
| 34 | primary and    | not       |             |     | governmental,            |                |     |          |   |
| 35 | secondary      | mentioned |             |     | institutional            | none           |     | yes (not |   |
| 36 | school)        | ed        | < 18        | m/f | institutional            |                |     | d)       | 0 |
| 37 | patients with  |           |             |     | institutional:           |                |     |          |   |
| 38 | type 2         |           |             |     | Canadian Institutes      |                |     |          |   |
| 39 | diabetes       | 2967      | adult       | m/f | for Health               | none           | yes |          | 1 |
| 40 |                |           |             |     | Research/Drug            |                |     |          | 1 |
| 41 |                |           |             |     |                          |                |     |          |   |
| 42 |                |           | no          |     | governmental,            |                |     |          |   |
| 43 | no restriction | 18933     | s           | m/f | institutional            | none           | no  |          | 0 |
| 44 |                |           | restriction |     |                          |                |     |          | 0 |

1  
2  
3  
4  
5  
6  
7  
8  
9  
10  
11  
12  
13  
14  
15  
16  
17  
18  
19  
20  
21  
22  
23  
24  
25  
26  
27  
28  
29  
30  
31  
32  
33  
34  
35  
36  
37  
38  
39  
40  
41  
42  
43  
44  
45  
46

|    |     |      |   |                                                                                                                                                                                                                                                                                |                                                                                                                                         |     |      |                      |                 |                                                 |                            |            |
|----|-----|------|---|--------------------------------------------------------------------------------------------------------------------------------------------------------------------------------------------------------------------------------------------------------------------------------|-----------------------------------------------------------------------------------------------------------------------------------------|-----|------|----------------------|-----------------|-------------------------------------------------|----------------------------|------------|
| SR | 156 | 2013 | 1 | Ian C. Scott, Rachael Tan, Daniel Stahl, Sophia Steer, Cathryn M. Lewis, and Andrew P. Cope The protective effect of alcohol on developing rheumatoid arthritis: a systematic review and meta-analysis Rheumatology (2013) 52 (5): 856-867 first published online 15 June 2013 | Cellular Biology of Inflammation, Department of Medical and Molecular Genetics, Guy's Hospital, St Thomas' Hospital, London SE1 1UL, UK | GBR | 2013 | rheumatoid arthritis | community-based | alcohol intake                                  | community setting          | Community  |
| SR | 157 | 2014 | 1 | Hu MB, Xu H, Bai PD, et al. Obesity has multifaceted impact on biochemical recurrence of prostate cancer: a dose-response meta-analysis of 36,927 patients. Med Oncol 2014; 31:829. DOI: 10.1007/s12032-013-0829-8                                                             | Huashan Hospital, Fudan University, No.12 Wulumuqi Road, Shanghai, 200040, China                                                        | CHN | 2014 | prostate cancer      | Prevention      | assessing effect of obesity (BMI) on recurrence | clinical setting           | Outpatient |
| SR | 158 | 2014 | 1 | Blasco, M.A., Redleaf, M.I., 2014. Cochlear implantation in unilateral sudden deafness improves tinnitus and speech comprehension: meta-analysis and systematic review. Otol. Neurotol. 35 (8), 1426-1432. DOI: 10.1097/MAO.0000000000000431                                   | College of Medicine, University of Illinois at Chicago, Chicago, Illinois                                                               | USA | 2014 | cochlear implants    | Treatment       | hearing loss                                    | outpatients                | Outpatient |
| SR | 159 | 2014 | 1 | Physical Activity in Overweight and Obese Adolescents: Systematic Review of the Effects on Physical Fitness Components and Cardiovascular Risk Factors SPORTS MEDICINE Volume: 44 Issue: 8 Pages: 1139-1152 Published: AUG 2014                                                | Janeiro, Lab Phys Act & Hlth Promot, Inst Phys Educ & Sports, BR-20550013 Rio De Janeiro,                                               | BRA | 2014 | obesity prevention   | Prevention      | physical activity                               | community, therapy setting | Multiple   |
| SR | 160 | 2015 | 1 | Gibbs et al., 2014, M. Gibbs, C. Winsper, S. Marwaha, E. Gilbert, M. Broome, S.P. Singh, Cannabis use and mania symptoms: a systematic review and meta-analysis J. Affect. Disord., 171C (2014), pp. 39–47, doi:10.1016/j.jad.2014.09.016                                      | Division of Mental Health and Wellbeing, Warwick Medical School, University of Warwick, CV4 7AL, UK                                     | GBR | 2015 | cannabis use         | community-based | cannabis use and association with mania         | community setting          | Community  |

Rapid reviews

|    |               |       |         |     |                          |              |          |     |
|----|---------------|-------|---------|-----|--------------------------|--------------|----------|-----|
| 1  |               |       |         |     |                          |              |          |     |
| 2  |               |       |         |     | undertaking a            |              |          |     |
| 3  | drinkers/non- | 96462 | adult   | m/f | governmental,            | clinical re- | none     |     |
| 4  | drinkers      |       |         |     | institutional: Arthritis | search       | mentione |     |
| 5  | patients with |       |         |     | Research UK              | fellowship,  | d        | 0 0 |
| 6  | primary       |       |         |     | governmental,            |              |          |     |
| 7  | prostate      | 36927 | adult   | m   | institutional: National  |              | none     |     |
| 8  | cancer        |       |         |     | Natural Science          |              | mentione |     |
| 9  | patients with |       |         |     | Foundation of China      | none         | d        | 0 0 |
| 10 | unilateral    |       |         |     |                          |              |          |     |
| 11 | hearing loss  | 36    | adult   | m/f | governmental,            |              | none     |     |
| 12 | overweight    |       |         |     | institutional            | none         | mentione |     |
| 13 | and obese     |       |         |     | institutional: Carlos    |              | d        | 0 0 |
| 14 | adolescents   | 1616  | 12 - 17 | m/f | Chagas Filho             |              |          |     |
| 15 | who had       |       |         |     | Foundation for the       | none         | mentione |     |
| 16 | experienced   |       |         |     | Research Support in      | none         | d        | 0 1 |
| 17 | mania         | 2391  | > 12    | m/f |                          |              |          |     |
| 18 | symptoms      |       |         |     | governmental,            |              | yes (not |     |
| 19 |               |       |         |     | institutional            | none         | mentione |     |
| 20 |               |       |         |     |                          |              | d)       | 0 1 |



|    |                 |             |             |                         |                |          |  |   |
|----|-----------------|-------------|-------------|-------------------------|----------------|----------|--|---|
| 1  |                 |             |             |                         |                |          |  |   |
| 2  | Anesthesia      | no          |             |                         |                |          |  |   |
| 3  | patients of all | restriction |             | governmental,           | not            | no       |  |   |
| 4  | ages            | 3538 s      | m/f         | institutional           | mentioned      | protocol |  | 1 |
| 5  | adults with     |             |             | governmental,           |                |          |  |   |
| 6  | severe          | not         |             | institutional:          |                |          |  |   |
| 7  | mental          | mention     |             | Canadian Psychiatric    |                | no       |  |   |
| 8  | illness SMI     | adult       | m/f         | Association             | none           | protocol |  | 0 |
| 9  |                 |             |             | institutional: Cancer   |                |          |  |   |
| 10 |                 | not         |             | Care Ontario,           |                | none     |  |   |
| 11 | adults          | mention     | adult       | Ministry of Health      | not            | mentione |  | 1 |
| 12 | patients in     | ed          | m/f         | and Long-Term Care      | mentioned      | d        |  |   |
| 13 | emergency       | >           | no          |                         |                |          |  |   |
| 14 | department      | 1700000     | restriction | governmental,           | none           | yes      |  | 1 |
| 15 | repeatedly      | 0           | s           | institutional           |                |          |  |   |
| 16 | visiting ED     | not         | no          |                         |                | none     |  |   |
| 17 | within 48 or    | mention     | restriction | governmental,           |                | mentione |  |   |
| 18 | 72h             | ed          | s           | institutional           | none           | d        |  | 0 |
| 19 | patients        |             |             |                         |                |          |  |   |
| 20 | undergoing      |             |             | governmental,           | not            | none     |  |   |
| 21 | surgery         | 45516       | adult       | institutional           | mentioned      | d        |  | 0 |
| 22 | receiving       |             |             |                         |                |          |  |   |
| 23 | mental          | not         | no          |                         |                | none     |  |   |
| 24 | health          | mention     | restriction | governmental,           |                | mentione |  |   |
| 25 | services        | ed          | s           | institutional           | none           | d        |  | 0 |
| 26 |                 |             |             | institutional: Cancer   |                |          |  |   |
| 27 | Population      | not         | no          | Care Ontario,           |                |          |  |   |
| 28 |                 | mention     | restriction | Ministry of Health      | not            |          |  |   |
| 29 | Patients with   | ed          | s           | and Long-Term Care      | mentioned      | yes      |  | 0 |
| 30 | cancer          |             |             |                         |                |          |  |   |
| 31 |                 | not         | no          | governmental,           |                | yes (not |  |   |
| 32 | patients with   | mention     | restriction | institutional: Cancer   | not            | mentione |  |   |
| 33 | chronic pain    | ed          | s           | Institute NSW           | mentioned      | d)       |  | 0 |
| 34 | symptoms        |             |             |                         |                |          |  |   |
| 35 |                 |             |             | governmental,           |                | yes (not |  |   |
| 36 | adolescent      | 2418        | adult       | institutional           | none           | mentione |  | 1 |
| 37 | girls           | 16744       | adolescen   | institutional; National | the authors of |          |  |   |
| 38 |                 |             | t           | Institute for Health    | The Marmot     | none     |  |   |
| 39 |                 |             | f           | Research (NIHR), UK     | Review's Fair  | mentione |  |   |
| 40 | Population      |             |             | Clinical Research       | Society        | d        |  |   |
| 41 |                 |             |             | institutional: National |                |          |  |   |
| 42 |                 | not         | no          | Institute for Health    |                | none     |  |   |
| 43 |                 | mention     | restriction | and Clinical            |                | mentione |  |   |
| 44 |                 | ed          | s           | Excellence (NICE),      | none           | d        |  | 0 |





|    |                 |         |             |     |                          |               |          |   |
|----|-----------------|---------|-------------|-----|--------------------------|---------------|----------|---|
| 1  | patients        |         |             |     |                          |               |          |   |
| 2  | suffering       |         |             |     |                          |               | none     |   |
| 3  | from chronic    |         |             |     | governmental,            |               | mentione |   |
| 4  | pain            | 711     | adult       | m/f | institutional            | none          | d        | 0 |
| 5  |                 |         |             |     |                          |               |          |   |
| 6  | general         |         | no          |     | governmental,            |               | yes (not |   |
| 7  | population      | 115613  | restriction | m/f | institutional            | none          | mentione | 1 |
| 8  | participants    |         |             |     | institutional: Policy    |               | d)       |   |
| 9  | requesting      | not     | no          |     | Research                 |               | yes (not |   |
| 10 | cosmetic        | mention | restriction | m/f | Programme in the         |               | mentione |   |
| 11 | procedures      | ed      | s           |     | Department of Health     | none          | d)       | 1 |
| 12 |                 |         |             |     | institutional:           |               |          |   |
| 13 | children 0–5    | not     |             |     | SCPHRP is funded         |               | none     |   |
| 14 | years           | mention | 0 - 5       | m/f | by the Medical           | not           | mentione |   |
| 15 |                 | ed      |             |     | Research Council         | mentioned     | d        | 0 |
| 16 |                 |         |             |     | institutional: British   |               |          |   |
| 17 | general         | not     | no          |     | Heart Foundation,        |               | none     |   |
| 18 | population      | mention | restriction | m/f | Economic and Social      |               | mentione |   |
| 19 |                 | ed      | s           |     | Research Council,        | none          | d        | 0 |
| 20 |                 |         |             |     |                          |               |          |   |
| 21 | school age      |         |             |     | governmental,            |               | yes (not |   |
| 22 | children        | 2717    | 2 - 13      | m/f | institutional            | none          | mentione | 0 |
| 23 | patients        |         |             |     |                          |               | d)       |   |
| 24 | suffering       |         |             |     |                          |               |          |   |
| 25 | from chronic    |         |             |     | governmental,            |               | none     |   |
| 26 | pain            | 1087    | adult       | m/f | institutional            | none          | mentione | 0 |
| 27 |                 |         |             |     |                          |               | d        |   |
| 28 | healthcare      | not     |             |     | governmental,            |               |          |   |
| 29 | providers       | mention | adult       | m/f | institutional: NIHR      |               | yes      | 1 |
| 30 | patients with   | ed      |             |     | CLAHRC for Leeds,        | none          |          |   |
| 31 | and without     |         |             |     | York & Bradford          |               |          |   |
| 32 | intellectual    |         |             |     | governmental,            |               |          |   |
| 33 | disabilities    | 4721    | > 2         | m/f | institutional: National  |               | yes      | 0 |
| 34 |                 |         |             |     | Institute for Health     | none          |          |   |
| 35 |                 |         |             |     | Research (NIHR)          |               |          |   |
| 36 | adult women     |         |             |     | institutional: Hull York |               | yes (not |   |
| 37 | with live birth | 506     | adult       | f   | Medical School           |               | mentione |   |
| 38 |                 |         |             |     | (HYMS), University of    |               | d)       | 0 |
| 39 |                 |         |             |     | York, York               | none          |          |   |
| 40 | adult health    | not     |             |     | institutional:           |               | yes (not |   |
| 41 | service users   | mention | adult       | m/f | European Centre for      | not           | mentione |   |
| 42 |                 | ed      |             |     | Disease Prevention       | mentioned     | d)       | 1 |
| 43 |                 |         |             |     | and Control (ECDC)       |               |          |   |
| 44 |                 |         |             |     | institutional: Health    |               |          |   |
| 45 | Population      | not     | no          | m/f | Protection Agency        | funding for   |          |   |
| 46 |                 | mention | restriction |     | (HPA) and the            | influenza-    |          |   |
|    |                 | ed      | s           |     | Department of            | related       |          |   |
|    |                 |         |             |     | Department of            | research from |          | 1 |



|    |               |              |       |                                                                                     |                                |                            |                |
|----|---------------|--------------|-------|-------------------------------------------------------------------------------------|--------------------------------|----------------------------|----------------|
| 1  |               |              |       |                                                                                     |                                |                            |                |
| 2  | alcohol-      |              |       |                                                                                     |                                |                            |                |
| 3  | associated    |              |       |                                                                                     |                                |                            |                |
| 4  | violence      | 1265 > 14    | m/f   | governmental,<br>institutional                                                      | not<br>mentioned               | yes (not<br>mentione<br>d) | 0              |
| 5  | problems      |              |       |                                                                                     |                                |                            |                |
| 6  |               |              |       |                                                                                     |                                | none                       |                |
| 7  | Patients with | 102 adult    | m/f   | governmental,<br>institutional                                                      | none                           | mentione<br>d              | 0              |
| 8  | vertigo       |              |       |                                                                                     |                                |                            |                |
| 9  | patients at   | no           |       | governmental,<br>institutional:                                                     | is a                           | contributing               |                |
| 10 | emergency     | restriction  |       | Canadian Institutes                                                                 | editor for                     | no                         |                |
| 11 | department    | 9963 s       | m/f   | of Health Research                                                                  | Open                           | protocol                   | 1              |
| 12 |               | not          |       |                                                                                     |                                |                            |                |
| 13 | cancer        | mentioned    | adult | m/f                                                                                 | governmental,<br>institutional | not<br>mentioned           | no<br>protocol |
| 14 | patients      |              |       |                                                                                     |                                |                            | 1              |
| 15 | healthy       |              |       |                                                                                     |                                |                            |                |
| 16 | poplation or  |              |       |                                                                                     |                                |                            |                |
| 17 | patients with | 1903 adult   | m/f   | institutional: Defense<br>Health Program and<br>USUHS, Consortium<br>for Health and | none                           | not<br>published           | 1              |
| 18 | insomnia      |              |       |                                                                                     |                                |                            |                |
| 19 | patients with |              |       |                                                                                     |                                | yes (not<br>mentione<br>d) |                |
| 20 | chronic pain  | 3561 adult   | m/f   | governmental,<br>institutional                                                      | none                           |                            | 1              |
| 21 | symptoms      |              |       |                                                                                     |                                |                            |                |
| 22 |               |              |       |                                                                                     |                                |                            |                |
| 23 |               |              |       |                                                                                     |                                |                            |                |
| 24 |               |              |       |                                                                                     |                                |                            |                |
| 25 |               |              |       |                                                                                     |                                | none                       |                |
| 26 | COPD          | 176 adult    | m/f   | governmental,<br>institutional                                                      | none                           | mentione<br>d              | 1              |
| 27 | patients      |              |       |                                                                                     |                                |                            |                |
| 28 |               |              |       |                                                                                     |                                |                            |                |
| 29 | hip fracture  | 195 > 65     | m/f   | governmental,<br>institutional                                                      | none                           | none<br>mentione<br>d      | 1              |
| 30 | patients      |              |       |                                                                                     |                                |                            |                |
| 31 |               |              |       |                                                                                     |                                |                            |                |
| 32 | patients with | 3318 > 53    | m/f   | governmental,<br>institutional                                                      | none                           | none<br>mentione<br>d      | 1              |
| 33 | heart failure |              |       |                                                                                     |                                |                            |                |
| 34 |               |              |       |                                                                                     |                                |                            |                |
| 35 |               |              |       |                                                                                     |                                | none                       |                |
| 36 | surgery       | 372746 adult | m/f   | governmental,<br>institutional                                                      | none                           | mentione<br>d              | 1              |
| 37 | patients      |              |       |                                                                                     |                                |                            |                |
| 38 |               |              |       |                                                                                     |                                |                            |                |
| 39 | patients with | 0 adult      | f/m   | governmental,<br>institutional                                                      | none                           | none<br>mentione<br>d      | 1              |
| 40 | CAP           |              |       |                                                                                     |                                |                            |                |



|    |               |         |          |     |                       |           |          |   |
|----|---------------|---------|----------|-----|-----------------------|-----------|----------|---|
| 1  | patients      |         |          |     |                       |           |          |   |
| 2  | being         |         |          |     |                       | none      |          |   |
| 3  | discharged    |         |          |     | governmental,         | mentione  |          |   |
| 4  | from hospital | 0       | adult    | f/m | institutional         | d         | none     | 1 |
| 5  |               |         |          |     |                       |           |          |   |
| 6  | patients with | not     |          |     |                       |           | none     |   |
| 7  | CAP           | mention | adult    | m/f | governmental,         | mentione  | d        | 1 |
| 8  |               | ed      |          |     | institutional         |           | none     |   |
| 9  |               |         |          |     |                       |           |          |   |
| 10 | patients with |         |          |     |                       |           | none     |   |
| 11 | COPD          | 574     | adult    | m/f | governmental,         | mentione  | d        | 1 |
| 12 |               |         |          |     | institutional         |           | none     |   |
| 13 | patients with |         |          |     |                       |           | none     |   |
| 14 | COPD          | ca 400  | > 40     | m/f | governmental,         | mentione  | d        | 1 |
| 15 |               |         |          |     | institutional         |           | none     |   |
| 16 | children 11 - |         |          |     |                       |           | none     |   |
| 17 | 18            | ca 3500 | 11 to 18 | m/f | funded by Lambeth     | not       | mentione |   |
| 18 |               |         |          |     | PCT                   | mentioned | d        | 0 |
| 19 |               |         |          |     |                       |           |          |   |
| 20 | heart failure |         |          |     |                       |           | none     |   |
| 21 | patients      | 296     | adult    | m/f | governmental,         | mentione  | d        | 1 |
| 22 |               |         |          |     | institutional         |           | none     |   |
| 23 | postacute     | not     |          |     |                       |           | none     |   |
| 24 | stroke        | mention | adult    | m/f | governmental,         | mentione  | d        | 1 |
| 25 | patients      | ed      |          |     | institutional         |           | none     |   |
| 26 |               |         |          |     |                       |           |          |   |
| 27 | patients with |         |          |     |                       |           | none     |   |
| 28 | hip fracture  | 0       | adult    | f/m | governmental,         | mentione  | d        | 1 |
| 29 | post-acute    |         |          |     | institutional         |           | none     |   |
| 30 | stroke, CHF,  | not     |          |     |                       |           | none     |   |
| 31 | and COPD      | mention | adult    | m/f | governmental,         | mentione  | d        | 1 |
| 32 | patients      | ed      |          |     | institutional         |           | none     |   |
| 33 |               |         |          |     |                       |           |          |   |
| 34 | adults        | 895     | adult    | m/f | governmental,         | mentione  | d        | 1 |
| 35 |               |         |          |     | institutional         |           | none     |   |
| 36 | patients at   |         |          |     |                       |           | none     |   |
| 37 | the end of    |         |          |     |                       |           | mentione |   |
| 38 | life          | 1836    | adult    | m/f | governmental,         | d         |          | 1 |
| 39 |               |         |          |     | institutional,        |           |          |   |
| 40 | acute         |         |          |     | institutional: funded |           |          |   |
| 41 | hospital      |         |          |     | by the HS&DR          |           |          |   |
| 42 | patients      | 142899  | adult    | m/f | programme, NIHR       | none      | yes      | 0 |

|    |        |     |      |   |                                                                                                                                                                                                                                   |                                                                                       |     |      |                                         |                 |                                     |                                               |                    |
|----|--------|-----|------|---|-----------------------------------------------------------------------------------------------------------------------------------------------------------------------------------------------------------------------------------|---------------------------------------------------------------------------------------|-----|------|-----------------------------------------|-----------------|-------------------------------------|-----------------------------------------------|--------------------|
| 1  |        |     |      |   | Wang M. Airway clearance techniques for patients with stable chronic obstructive pulmonary disease (COPD): a rapid review. Toronto: Health Quality Ontario; 2015 February. 23 p. Available from:                                  | Health Quality Ontario, <a href="http://www.hqontario.ca">http://www.hqontario.ca</a> | CAN | 2015 | COPD management                         | Treatment       | airway clearance techniques         | outpatients                                   | Outpatient         |
| 2  |        |     |      |   | Health Quality Ontario. Exercise programs after pulmonary rehabilitation for patients with chronic obstructive pulmonary disease (COPD). Toronto: Health Quality Ontario; 2015 February. 20 p. Available from:                    | Health Quality Ontario, <a href="http://www.hqontario.ca">http://www.hqontario.ca</a> | CAN | 2015 | COPD rehabilitation                     | Treatment       | exercise programs                   | community setting (exercise)                  | Community          |
| 3  |        |     |      |   | Health Quality Ontario. Respiratory services in home care for individuals with chronic obstructive pulmonary disease (COPD): a rapid review. Toronto: Health Quality Ontario; 2015 February. 20 p. Available from:                | Health Quality Ontario, <a href="http://www.hqontario.ca">http://www.hqontario.ca</a> | CAN | 2015 | respiratory rehabilitation              | Treatment       | respiratory therapy                 | therapy setting                               | Outpatient         |
| 4  | CRD RF | 208 | 2015 | 1 | <a href="http://www.hqontario.ca/evidence/evidence-process/episodes-of-care#community-chf">http://www.hqontario.ca/evidence/evidence-process/episodes-of-care#community-chf</a>                                                   | Health Quality Ontario, <a href="http://www.hqontario.ca">http://www.hqontario.ca</a> | CAN | 2015 | COPD management                         | Treatment       | airway clearance techniques         | outpatients                                   | Outpatient         |
| 5  |        |     |      |   | Health Quality Ontario. Physical activity counselling: a rapid review. Toronto: Health Quality Ontario; 2015 February. 20 p. Available from:                                                                                      | Health Quality Ontario, <a href="http://www.hqontario.ca">http://www.hqontario.ca</a> | CAN | 2015 | secondary prevention of heart failure   | Prevention      | exercise counselling                | community setting (exercise)                  | Community          |
| 6  | CRD RF | 209 | 2015 | 1 | <a href="http://www.hqontario.ca/evidence/evidence-process/episodes-of-care#community-chf">http://www.hqontario.ca/evidence/evidence-process/episodes-of-care#community-chf</a>                                                   | Health Quality Ontario, <a href="http://www.hqontario.ca">http://www.hqontario.ca</a> | CAN | 2015 | secondary prevention of heart failure   | Prevention      | exercise counselling                | community setting (exercise)                  | Community          |
| 7  |        |     |      |   | Health Quality Ontario. Cognitive-behavioural therapy for anxiety and depression in patients with COPD: a rapid review. Toronto: Health Quality Ontario; 2015 February. 21 p. Available from:                                     | Health Quality Ontario, <a href="http://www.hqontario.ca">http://www.hqontario.ca</a> | CAN | 2015 | anxiety and depression in COPD patients | Treatment       | cognitive-behavioural therapy (CBT) | therapy setting                               | Outpatient         |
| 8  | CRD RF | 210 | 2015 | 1 | <a href="http://www.hqontario.ca/evidence/evidence-process/episodes-of-care#community-chf">http://www.hqontario.ca/evidence/evidence-process/episodes-of-care#community-chf</a>                                                   | Health Quality Ontario, <a href="http://www.hqontario.ca">http://www.hqontario.ca</a> | CAN | 2015 | anxiety and depression in COPD patients | Treatment       | cognitive-behavioural therapy (CBT) | therapy setting                               | Outpatient         |
| 9  |        |     |      |   | Health Quality Ontario. Aerobic exercise training in patients with heart failure: a rapid review. Toronto: Health Quality Ontario; 2015 February. 19 p. Available from:                                                           | Health Quality Ontario, <a href="http://www.hqontario.ca">http://www.hqontario.ca</a> | CAN | 2015 | secondary prevention of heart failure   | Prevention      | aerobic exercise                    | community setting (exercise)                  | Community          |
| 10 | CRD RF | 211 | 2013 | 1 | <a href="http://www.hqontario.ca/evidence/evidence-process/episodes-of-care#community-chf">http://www.hqontario.ca/evidence/evidence-process/episodes-of-care#community-chf</a>                                                   | Health Quality Ontario, <a href="http://www.hqontario.ca">http://www.hqontario.ca</a> | CAN | 2015 | secondary prevention of heart failure   | Prevention      | aerobic exercise                    | community setting (exercise)                  | Community          |
| 11 |        |     |      |   | Health Quality Ontario. Care coordination for postacute stroke, chronic obstructive pulmonary disease, and heart failure clients: an economic rapid review. Toronto: Health Quality Ontario; 2015 February. 20 p. Available from: | Health Quality Ontario, <a href="http://www.hqontario.ca">http://www.hqontario.ca</a> | CAN | 2015 | post-acute stroke, COPD, or CHF         | Health Services | care coordination intervention      | hospital hospital to home (discharge-setting) | Inpatient/Hospital |
| 12 | CRD RF | 212 | 2013 | 1 | <a href="http://www.hqontario.ca/evidence/evidence-process/episodes-of-care#community-chf">http://www.hqontario.ca/evidence/evidence-process/episodes-of-care#community-chf</a>                                                   | Health Quality Ontario, <a href="http://www.hqontario.ca">http://www.hqontario.ca</a> | CAN | 2013 | coronary/stroke prevention              | Prevention      | statin administration               | community setting                             | Community          |
| 13 |        |     |      |   | Health Quality Ontario. Physical activity counselling: a rapid review. Toronto: Health Quality Ontario; 2015 February. 20 p. Available from:                                                                                      | Health Quality Ontario, <a href="http://www.hqontario.ca">http://www.hqontario.ca</a> | CAN | 2015 | secondary prevention of heart failure   | Prevention      | exercise counselling                | community setting (exercise)                  | Community          |
| 14 | CRD RF | 213 | 2015 | 1 | <a href="http://www.hqontario.ca/evidence/evidence-process/episodes-of-care#community-chf">http://www.hqontario.ca/evidence/evidence-process/episodes-of-care#community-chf</a>                                                   | Health Quality Ontario, <a href="http://www.hqontario.ca">http://www.hqontario.ca</a> | CAN | 2015 | secondary prevention of heart failure   | Prevention      | exercise counselling                | community setting (exercise)                  | Community          |
| 15 |        |     |      |   | Health Quality Ontario. Care coordination for postacute stroke, chronic obstructive pulmonary disease, and heart failure clients: an economic rapid review. Toronto: Health Quality Ontario; 2015 February. 20 p. Available from: | Health Quality Ontario, <a href="http://www.hqontario.ca">http://www.hqontario.ca</a> | CAN | 2015 | post-acute stroke, COPD, or CHF         | Health Services | care coordination intervention      | hospital hospital to home (discharge-setting) | Inpatient/Hospital |
| 16 | CRD RF | 214 | 2015 | 1 | <a href="http://www.hqontario.ca/evidence/evidence-process/episodes-of-care#community-chf">http://www.hqontario.ca/evidence/evidence-process/episodes-of-care#community-chf</a>                                                   | Health Quality Ontario, <a href="http://www.hqontario.ca">http://www.hqontario.ca</a> | CAN | 2015 | post-acute stroke, COPD, or CHF         | Health Services | care coordination intervention      | hospital hospital to home (discharge-setting) | Inpatient/Hospital |
| 17 |        |     |      |   | Health Quality Ontario. Care coordination for postacute stroke, chronic obstructive pulmonary disease, and heart failure clients: an economic rapid review. Toronto: Health Quality Ontario; 2015 February. 24 p. Available from: | Health Quality Ontario, <a href="http://www.hqontario.ca">http://www.hqontario.ca</a> | CAN | 2015 | Discharge procedure                     | Health Services | medication reconciliation           | (discharge-setting)                           | Different/other    |
| 18 | CRD RF | 215 | 2015 | 1 | <a href="http://www.hqontario.ca/evidence/evidence-process/episodes-of-care#community-chf">http://www.hqontario.ca/evidence/evidence-process/episodes-of-care#community-chf</a>                                                   | Health Quality Ontario, <a href="http://www.hqontario.ca">http://www.hqontario.ca</a> | CAN | 2015 | Discharge procedure                     | Health Services | medication reconciliation           | (discharge-setting)                           | Different/other    |
| 19 |        |     |      |   | Health Quality Ontario. Care coordination for postacute stroke, chronic obstructive pulmonary disease, and heart failure clients: an economic rapid review. Toronto: Health Quality Ontario; 2015 February. 20 p. Available from: | Health Quality Ontario, <a href="http://www.hqontario.ca">http://www.hqontario.ca</a> | CAN | 2015 | post-acute stroke, COPD, or CHF         | Health Services | care coordination intervention      | hospital hospital to home (discharge-setting) | Inpatient/Hospital |
| 20 | CRD RF | 216 | 2015 | 1 | <a href="http://www.hqontario.ca/evidence/evidence-process/episodes-of-care#community-chf">http://www.hqontario.ca/evidence/evidence-process/episodes-of-care#community-chf</a>                                                   | Health Quality Ontario, <a href="http://www.hqontario.ca">http://www.hqontario.ca</a> | CAN | 2015 | post-acute stroke, COPD, or CHF         | Health Services | care coordination intervention      | hospital hospital to home (discharge-setting) | Inpatient/Hospital |
| 21 |        |     |      |   | Health Quality Ontario. Care coordination for postacute stroke, chronic obstructive pulmonary disease, and heart failure clients: an economic rapid review. Toronto: Health Quality Ontario; 2015 February. 20 p. Available from: | Health Quality Ontario, <a href="http://www.hqontario.ca">http://www.hqontario.ca</a> | CAN | 2015 | post-acute stroke, COPD, or CHF         | Health Services | care coordination intervention      | hospital hospital to home (discharge-setting) | Inpatient/Hospital |
| 22 | CRD RF | 217 | 2015 | 1 | <a href="http://www.hqontario.ca/evidence/evidence-process/episodes-of-care#community-chf">http://www.hqontario.ca/evidence/evidence-process/episodes-of-care#community-chf</a>                                                   | Health Quality Ontario, <a href="http://www.hqontario.ca">http://www.hqontario.ca</a> | CAN | 2015 | post-acute stroke, COPD, or CHF         | Health Services | care coordination intervention      | hospital hospital to home (discharge-setting) | Inpatient/Hospital |
| 23 |        |     |      |   | Health Quality Ontario. Care coordination for postacute stroke, chronic obstructive pulmonary disease, and heart failure clients: an economic rapid review. Toronto: Health Quality Ontario; 2015 February. 24 p. Available from: | Health Quality Ontario, <a href="http://www.hqontario.ca">http://www.hqontario.ca</a> | CAN | 2015 | Discharge procedure                     | Health Services | medication reconciliation           | (discharge-setting)                           | Different/other    |
| 24 | CRD RF | 218 | 2015 | 1 | <a href="http://www.hqontario.ca/evidence/evidence-process/episodes-of-care#community-chf">http://www.hqontario.ca/evidence/evidence-process/episodes-of-care#community-chf</a>                                                   | Health Quality Ontario, <a href="http://www.hqontario.ca">http://www.hqontario.ca</a> | CAN | 2015 | Discharge procedure                     | Health Services | medication reconciliation           | (discharge-setting)                           | Different/other    |
| 25 |        |     |      |   | Health Quality Ontario. Care coordination for postacute stroke, chronic obstructive pulmonary disease, and heart failure clients: an economic rapid review. Toronto: Health Quality Ontario; 2015 February. 20 p. Available from: | Health Quality Ontario, <a href="http://www.hqontario.ca">http://www.hqontario.ca</a> | CAN | 2015 | post-acute stroke, COPD, or CHF         | Health Services | care coordination intervention      | hospital hospital to home (discharge-setting) | Inpatient/Hospital |
| 26 | CRD RF | 219 | 2013 | 1 | <a href="http://www.hqontario.ca/evidence/evidence-process/episodes-of-care#community-chf">http://www.hqontario.ca/evidence/evidence-process/episodes-of-care#community-chf</a>                                                   | Health Quality Ontario, <a href="http://www.hqontario.ca">http://www.hqontario.ca</a> | CAN | 2013 | acute exacerbating COPD                 | Treatment       | in-hospital physiotherapy           | hospital                                      | Inpatient/Hospital |



|    |               |              |       |               |               |          |  |   |
|----|---------------|--------------|-------|---------------|---------------|----------|--|---|
| 1  |               |              |       |               |               |          |  |   |
| 2  |               |              |       |               |               |          |  |   |
| 3  | patients with |              |       | governmental, |               | none     |  |   |
| 4  | stable COPD   | 525 adult    | m/f   | institutional | none          | mentione |  | 1 |
| 5  |               |              |       |               |               | d        |  |   |
| 6  | patients with | not          |       | governmental, |               | none     |  |   |
| 7  | COPD or       | mention      |       | institutional |               | mentione |  |   |
| 8  | pneumonia     | ed           | adult | m/f           | none          | d        |  | 1 |
| 9  |               |              |       |               |               |          |  |   |
| 10 | patients with |              |       | governmental, |               | none     |  |   |
| 11 | respiratory   | 37 adult     | m/f   | institutional | none          | mentione |  | 1 |
| 12 | disease       |              |       |               |               | d        |  |   |
| 13 |               |              |       |               |               |          |  |   |
| 14 | patients with |              |       | governmental, |               | none     |  |   |
| 15 | hip fracture  | 339 adult    | m/f   | institutional | none          | mentione |  | 1 |
| 16 |               |              |       |               |               | d        |  |   |
| 17 | adults        | 169921 adult | m/f   | governmental, |               | none     |  |   |
| 18 |               |              |       | institutional | none          | mentione |  | 1 |
| 19 |               |              |       |               |               | d        |  |   |
| 20 | patients with |              |       | governmental, |               | none     |  |   |
| 21 | heart failure | 1628 adult   | m/f   | institutional | none          | mentione |  | 1 |
| 22 |               |              |       |               |               | d        |  |   |
| 23 | patients with | not          |       | governmental, |               | none     |  |   |
| 24 | COPD          | mention      | adult | m/f           | institutional | mentione |  | 1 |
| 25 |               | ed           |       |               | none          | d        |  |   |
| 26 | postacute     |              |       |               |               |          |  |   |
| 27 | stroke        | 399 adult    | m/f   | governmental, |               | none     |  |   |
| 28 | patients      |              |       | institutional | none          | mentione |  | 1 |
| 29 |               |              |       |               |               | d        |  |   |
| 30 | patients with |              |       | governmental, |               | none     |  |   |
| 31 | heart failure | 3662 adult   | m/f   | institutional | none          | mentione |  | 1 |
| 32 |               |              |       |               |               | d        |  |   |
| 33 | post-acute    |              |       |               |               |          |  |   |
| 34 | stroke,       |              |       | governmental, |               | none     |  |   |
| 35 | COPD, or      |              |       | institutional | none          | mentione |  | 1 |
| 36 | CHF           | 0 -          | f/m   |               |               | d        |  |   |
| 37 | being         |              |       |               |               |          |  |   |
| 38 | discharged,   |              |       |               |               |          |  |   |
| 39 | receiving     |              |       | governmental, |               | none     |  |   |
| 40 | medication    | 2447 adult   | m/f   | institutional | none          | mentione |  | 1 |
| 41 | patients with |              |       |               |               | d        |  |   |
| 42 | acute         |              |       |               |               |          |  |   |
| 43 | exacerbating  | not          |       | governmental, |               | none     |  |   |
| 44 | COPD          | mention      | adult | m/f           | institutional | mentione |  | 1 |
| 45 |               | ed           |       |               | none          | d        |  |   |
| 46 |               |              |       |               |               |          |  |   |

Health Quality Ontario. Effectiveness and safety of thrombolytics for  
ischemic stroke: a rapid review. Toronto, ON: Health Quality Ontario; 2013  
Jan. 25 p. Available from: [http://www.hqontario.ca/evidence/publications-  
and-ohrac-recommendations/rapid-revi](http://www.hqontario.ca/evidence/publications-and-ohrac-recommendations/rapid-revi)

Health Quality Ontario,  
<http://www.hqontario.ca>

CAN 2013

treatment of  
ischemic stroke

Treatment

intravenous  
thrombolytics  
administration

hospital

Inpatient/  
Hospital

For peer review only

1  
2  
3  
4  
5  
6  
7  
8  
9  
10  
11  
12  
13  
14  
15  
16  
17  
18  
19  
20  
21  
22  
23  
24  
25  
26  
27  
28  
29  
30  
31  
32  
33  
34  
35  
36  
37  
38  
39  
40  
41  
42  
43  
44  
45  
46

|                                |      |       |     |                             |      |                |   |
|--------------------------------|------|-------|-----|-----------------------------|------|----------------|---|
| patients with ischaemic stroke | 6288 | adult | m/f | governmental, institutional | none | none mentioned | 1 |
|--------------------------------|------|-------|-----|-----------------------------|------|----------------|---|

For peer review only

| Review type | Sequence of exclusion after randomization | Reference                                                                                                                                                                                                                                                                             |
|-------------|-------------------------------------------|---------------------------------------------------------------------------------------------------------------------------------------------------------------------------------------------------------------------------------------------------------------------------------------|
| CSR         | 1                                         | Verra Wiebe C, van den Boom Lennard GH, Jacobs W, Clement Darren J, Wymenga Ate AB, Nelissen Rob GHH. Retention versus sacrifice of the posterior cruciate ligament in total knee arthroplasty for treating osteoarthritis. Cochrane Database of Systematic Reviews [Internet]. 2013. |
| CSR         | 2                                         | Anie Kofi A, Massaglia P. Psychological therapies for thalassaemia. Cochrane Database of Systematic Reviews [Internet]. 2014.                                                                                                                                                         |
| CSR         | 3                                         | Wilkinson P, Izmeth Z. Continuation and maintenance treatments for depression in older people. Cochrane Database of Systematic Reviews [Internet]. 2012.                                                                                                                              |
| CSR         | 4                                         | van Dalen Elvira C, van As Jorrit W, de Camargo B. Methotrexate for high-grade osteosarcoma in children and young adults. Cochrane Database of Systematic Reviews [Internet]. 2011.                                                                                                   |
| CSR         | 5                                         | Omar Muhammad I, Alexander Cameron E. Drug treatment for faecal incontinence in adults. Cochrane Database of Systematic Reviews [Internet]. 2013.                                                                                                                                     |
| CSR         | 6                                         | Preston Nancy J, Hurlow A, Brine J, Bennett Michael I. Blood transfusions for anaemia in patients with advanced cancer. Cochrane Database of Systematic Reviews [Internet]. 2012.                                                                                                     |
| CSR         | 7                                         | Skoetz N, Bauer K, Elter T, Monsef I, Roloff V, Hallek M, et al. Alemtuzumab for patients with chronic lymphocytic leukaemia. Cochrane Database of Systematic Reviews [Internet]. 2012.                                                                                               |
| CSR         | 8                                         | Li Luying R, Sydenham E, Chaudhary B, Beecher D, You C. Glucocorticoid with cyclophosphamide for paraquat-induced lung fibrosis. Cochrane Database of Systematic Reviews [Internet]. 2014.                                                                                            |
| CSR         | 9                                         | Ohlsson A, Lacy Janet B. Intravenous immunoglobulin for preventing infection in preterm and/or low birth weight infants. Cochrane Database of Systematic Reviews [Internet]. 2013.                                                                                                    |
| CSR         | 10                                        | Gurusamy Kurinchi S, Giljaca V, Takwoingi Y, Higgie D, Poropat G, Štimac D, et al. Endoscopic retrograde cholangiopancreatography versus intraoperative cholangiography for diagnosis of common bile duct stones. Cochrane Database of Systematic Reviews [Internet]. 2015.           |
| CSR         | 11                                        | Zhang Y, Fang C, Dong Bi R, Wu T, Deng Jue L. Oxygen therapy for pneumonia in adults. Cochrane Database of Systematic Reviews [Internet]. 2012.                                                                                                                                       |
| CSR         | 12                                        | Qureshi Mosarrat J, Kumar M. D-Penicillamine for preventing retinopathy of prematurity in preterm infants. Cochrane Database of Systematic Reviews [Internet]. 2013.                                                                                                                  |
| CSR         | 13                                        | Di Nisio M, Peinemann F, Porreca E, Rutjes Anne WS. Primary prophylaxis for venous thromboembolism in patients undergoing cardiac or thoracic surgery. Cochrane Database of Systematic Reviews [Internet]. 2015.                                                                      |
| CSR         | 14                                        | Tan Hannah B, Danilla S, Murray A, Serra R, El Dib R, Henderson Tom OW, et al. Immunonutrition as an adjuvant therapy for burns. Cochrane Database of Systematic Reviews [Internet]. 2014.                                                                                            |
| CSR         | 15                                        | Hurlow A, Bennett Michael I, Robb Karen A, Johnson Mark I, Simpson Karen H, Oxberry Stephen G. Transcutaneous electric nerve stimulation (TENS) for cancer pain in adults. Cochrane Database of Systematic Reviews [Internet]. 2012.                                                  |
| CSR         | 16                                        | Dong Z, Xu J, Wang Z, Petrov Maxim S. Stents for the prevention of pancreatic fistula following pancreaticoduodenectomy. Cochrane Database of Systematic Reviews [Internet]. 2013.                                                                                                    |
| CSR         | 17                                        | Feagan Brian G, MacDonald John K. Oral 5-aminosalicylic acid for induction of remission in ulcerative colitis. Cochrane Database of Systematic Reviews [Internet]. 2012.                                                                                                              |
| CSR         | 18                                        | Dhiwakar M, Clement WA, Supriya M, McKerrow W. Antibiotics to reduce post-tonsillectomy morbidity. Cochrane Database of Systematic Reviews [Internet]. 2012.                                                                                                                          |
| CSR         | 19                                        | Gal Robin L, Vedula Satyanarayana S, Beck R. Corticosteroids for treating optic neuritis. Cochrane Database of Systematic Reviews [Internet]. 2015.                                                                                                                                   |
| CSR         | 20                                        | Andras A, Sala Tenna A, Crawford F. Vitamin K antagonists or low-molecular-weight heparin for the long term treatment of symptomatic venous thromboembolism. Cochrane Database of Systematic Reviews [Internet]. 2012.                                                                |
| CSR         | 21                                        | Rajaram Sujanthi S, Desai Nayan K, Kalra A, Gajera M, Cavanaugh Susan K, Brampton W, et al. Pulmonary artery catheters for adult patients in intensive care. Cochrane Database of Systematic Reviews [Internet]. 2013.                                                                |
| CSR         | 22                                        | Nelson Richard L, Kelsey P, Leeman H, Meardon N, Patel H, Paul K, et al. Antibiotic treatment for Clostridium difficile-associated diarrhea in adults. Cochrane Database of Systematic Reviews [Internet]. 2011.                                                                      |
| CSR         | 23                                        | Gurion R, Belnik-Plitman Y, Gafter-Gvili A, Paul M, Vidal L, Ben-Bassat I, et al. Colony-stimulating factors for prevention and treatment of infectious complications in patients with acute myelogenous leukemia. Cochrane Database of Systematic Reviews [Internet]. 2012.          |

|     |    |                                                                                                                                                                                                                                                                              |
|-----|----|------------------------------------------------------------------------------------------------------------------------------------------------------------------------------------------------------------------------------------------------------------------------------|
| CSR | 24 | Akl Elie A, Ramly Elie P, Kahale Lara A, Yosuico Victor ED, Barba M, Sperati F, et al. Anticoagulation for people with cancer and central venous catheters. <i>Cochrane Database of Systematic Reviews</i> [Internet]. 2014.                                                 |
| CSR | 25 | Maduwage K, Buckley Nick A, de Silva HJ, Laloo David G, Isbister Geoffrey K. Snake antivenom for snake venom induced consumption coagulopathy. <i>Cochrane Database of Systematic Reviews</i> [Internet]. 2015.                                                              |
| CSR | 26 | Xiao Y, Luo M, Wang J, Luo H. Losigamone add-on therapy for partial epilepsy. <i>Cochrane Database of Systematic Reviews</i> [Internet]. 2012.                                                                                                                               |
| CSR | 27 | Lamers Mieke H, Broekman M, Drenth Joost PH, Gluud C. Aminoadamantanes versus other antiviral drugs for chronic hepatitis C. <i>Cochrane Database of Systematic Reviews</i> [Internet]. 2014.                                                                                |
| CSR | 28 | Elbers Roy G, Verhoef J, van Wegen Erwin EH, Berendse Henk W, Kwakkel G. Interventions for fatigue in Parkinson's disease. <i>Cochrane Database of Systematic Reviews</i> [Internet]. 2015.                                                                                  |
| CSR | 29 | Lodha R, Kabra Sushil K, Pandey Ravindra M. Antibiotics for community-acquired pneumonia in children. <i>Cochrane Database of Systematic Reviews</i> [Internet]. 2013.                                                                                                       |
| CSR | 30 | Thornton J, Rangaraj S. Disease modifying anti-rheumatic drugs in people with cystic fibrosis-related arthritis. <i>Cochrane Database of Systematic Reviews</i> [Internet]. 2012.                                                                                            |
| CSR | 31 | Wong V, Cheuk Daniel KL, Lee S, Chu V. Acupuncture for acute management and rehabilitation of traumatic brain injury. <i>Cochrane Database of Systematic Reviews</i> [Internet]. 2013.                                                                                       |
| CSR | 32 | Li H, Wang J, Li C, Xiao Z. Repetitive transcranial magnetic stimulation (rTMS) for panic disorder in adults. <i>Cochrane Database of Systematic Reviews</i> [Internet]. 2014.                                                                                               |
| CSR | 33 | Allersma T, Farquhar C, Cantineau Astrid EP. Natural cycle in vitro fertilisation (IVF) for subfertile couples. <i>Cochrane Database of Systematic Reviews</i> [Internet]. 2013.                                                                                             |
| CSR | 34 | Johnson N, Bryant A, Miles T, Hogberg T, Cornes P. Adjuvant chemotherapy for endometrial cancer after hysterectomy. <i>Cochrane Database of Systematic Reviews</i> [Internet]. 2011.                                                                                         |
| CSR | 35 | Choo Karen Jui L, Simons FER, Sheikh A. Glucocorticoids for the treatment of anaphylaxis. <i>Cochrane Database of Systematic Reviews</i> [Internet]. 2012.                                                                                                                   |
| CSR | 36 | Ohlsson A, Shah Vibhuti S, Stade Brenda C. Vaginal chlorhexidine during labour to prevent early-onset neonatal group B streptococcal infection. <i>Cochrane Database of Systematic Reviews</i> [Internet]. 2014.                                                             |
| CSR | 37 | Cheng Y, Lu J, Xiong X, Wu S, Lin Y, Wu T, et al. Gases for establishing pneumoperitoneum during laparoscopic abdominal surgery. <i>Cochrane Database of Systematic Reviews</i> [Internet]. 2013.                                                                            |
| CSR | 38 | Zheng J, Fang Y, Cai Bo W, Zhang H, Liu W, Wu B, et al. Intracystic bleomycin for cystic craniopharyngiomas in children. <i>Cochrane Database of Systematic Reviews</i> [Internet]. 2014.                                                                                    |
| CSR | 39 | Tonia T, Mettler A, Robert N, Schwarzer G, Seidenfeld J, Weingart O, et al. Erythropoietin or darbepoetin for patients with cancer. <i>Cochrane Database of Systematic Reviews</i> [Internet]. 2012.                                                                         |
| CSR | 40 | Bricker L, Medley N, Pratt Jeremy J. Routine ultrasound in late pregnancy (after 24 weeks' gestation). <i>Cochrane Database of Systematic Reviews</i> [Internet]. 2015.                                                                                                      |
| CSR | 41 | Lin X, Lu J, Yang M, Dong Bi R, Wu Hong M. Macrolides for diffuse panbronchiolitis. <i>Cochrane Database of Systematic Reviews</i> [Internet]. 2015.                                                                                                                         |
| CSR | 42 | Gurusamy Kurinchi S, Nagendran M, Broadhurst Jack F, Anker Stefan D, Richards T. Iron therapy in anaemic adults without chronic kidney disease. <i>Cochrane Database of Systematic Reviews</i> [Internet]. 2014.                                                             |
| CSR | 43 | El Dib R, Gameiro Orsi LF, Ogata Matheus SP, Módolo Norma SP, Braz Leandro G, Jorge Eliane C, et al. Zinc supplementation for the prevention of type 2 diabetes mellitus in adults with insulin resistance. <i>Cochrane Database of Systematic Reviews</i> [Internet]. 2015. |
| CSR | 44 | La Mantia L, Di Pietrantonj C, Rovaris M, Rigon G, Frau S, Berardo F, et al. Interferon-beta versus glatiramer acetate for relapsing-remitting multiple sclerosis. <i>Cochrane Database of Systematic Reviews</i> [Internet]. 2014.                                          |
| CSR | 45 | Zhao S, Sampson S, Xia J, Jayaram Mahesh B. Psychoeducation (brief) for people with serious mental illness. <i>Cochrane Database of Systematic Reviews</i> [Internet]. 2015.                                                                                                 |
| CSR | 46 | Gluud Lise L, Dam G, Les I, Córdoba J, Marchesini G, Borre M, et al. Branched-chain amino acids for people with hepatic encephalopathy. <i>Cochrane Database of Systematic Reviews</i> [Internet]. 2015.                                                                     |
| CSR | 47 | Mason M, Welsh Emma J, Smith I. Drug therapy for obstructive sleep apnoea in adults. <i>Cochrane Database of Systematic Reviews</i> [Internet]. 2013.                                                                                                                        |
| CSR | 48 | Tanaka Y, Nakayama T, Nishimori M, Tsujimura Y, Kawaguchi M, Sato Y. Lidocaine for preventing postoperative sore throat. <i>Cochrane Database of Systematic Reviews</i> [Internet]. 2015.                                                                                    |
| CSR | 49 | Petrucchi N, De Feo C. Lung protective ventilation strategy for the acute respiratory distress syndrome. <i>Cochrane Database of Systematic Reviews</i> [Internet]. 2013.                                                                                                    |
| CSR | 50 | Mehrholtz J, Kugler J, Pohl M. Locomotor training for walking after spinal cord injury. <i>Cochrane Database of Systematic Reviews</i> [Internet]. 2012.                                                                                                                     |
| CSR | 51 | Xander C, Meerpohl Joerg J, Galandi D, Buroh S, Schwarzer G, Antes G, et al. Pharmacological interventions for pruritus in adult palliative care patients. <i>Cochrane Database of Systematic Reviews</i> [Internet]. 2013.                                                  |
| CSR | 52 | Pammi M, Abrams Steven A. Oral lactoferrin for the treatment of sepsis and necrotizing enterocolitis in neonates. <i>Cochrane Database of Systematic Reviews</i> [Internet]. 2011.                                                                                           |

|     |    |                                                                                                                                                                                                                                                                                                                                                                           |
|-----|----|---------------------------------------------------------------------------------------------------------------------------------------------------------------------------------------------------------------------------------------------------------------------------------------------------------------------------------------------------------------------------|
| CSR | 53 | Eliakim-Raz N, Robenshtok E, Shefet D, Gafter-Gvili A, Vidal L, Paul M, et al. Empiric antibiotic coverage of atypical pathogens for community-acquired pneumonia in hospitalized adults. <i>Cochrane Database of Systematic Reviews</i> [Internet]. 2012.                                                                                                                |
| CSR | 54 | Hsu Charlie CT, Kwan Gigi NC, Thompson Shane A, Evans-Barns H, van Driel Mieke L. Embolisation for pulmonary arteriovenous malformation. <i>Cochrane Database of Systematic Reviews</i> [Internet]. 2015.                                                                                                                                                                 |
| CSR | 55 | Evans Jennifer R, Lawrenson John G. Antioxidant vitamin and mineral supplements for slowing the progression of age-related macular degeneration. <i>Cochrane Database of Systematic Reviews</i> [Internet]. 2012.                                                                                                                                                         |
| CSR | 56 | Stanton Tasha R, Wand Benedict M, Carr Daniel B, Birklein F, Wasner Gunnar L, O'Connell Neil E. Local anaesthetic sympathetic blockade for complex regional pain syndrome. <i>Cochrane Database of Systematic Reviews</i> [Internet]. 2013.                                                                                                                               |
| CSR | 57 | Afshari A, Wikkelsø A, Brok J, Møller Ann M, Wetterslev J. Thrombelastography (TEG) or thromboelastometry (ROTEM) to monitor haemotherapy versus usual care in patients with massive transfusion. <i>Cochrane Database of Systematic Reviews</i> [Internet]. 2011.                                                                                                        |
| CSR | 58 | Zhou Q, Zheng J, Yu L, Jia X. Pregabalin monotherapy for epilepsy. <i>Cochrane Database of Systematic Reviews</i> [Internet]. 2012.                                                                                                                                                                                                                                       |
| CSR | 59 | Kumbargere Nagraj S, Naresh S, Srinivas K, Renjith George P, Shrestha A, Levenson D, et al. Interventions for the management of taste disturbances. <i>Cochrane Database of Systematic Reviews</i> [Internet]. 2014.                                                                                                                                                      |
| CSR | 60 | Fernandes Ricardo M, Bialy Liza M, Vandermeer B, Tjosvold L, Plint Amy C, Patel H, et al. Glucocorticoids for acute viral bronchiolitis in infants and young children. <i>Cochrane Database of Systematic Reviews</i> [Internet]. 2013.                                                                                                                                   |
| CSR | 61 | Meerpohl Joerg J, Antes G, Rücker G, Fleeman N, Motschall E, Niemeyer Charlotte M, et al. Deferasirox for managing iron overload in people with thalassaemia. <i>Cochrane Database of Systematic Reviews</i> [Internet]. 2012.                                                                                                                                            |
| CSR | 62 | Andriolo Brenda NG, Andriolo Régis B, Saconato H, Atallah Álvaro N, Valente O. Early versus late tracheostomy for critically ill patients. <i>Cochrane Database of Systematic Reviews</i> [Internet]. 2015.                                                                                                                                                               |
| CSR | 63 | Magni Laura R, Purgato M, Gastaldon C, Papola D, Furukawa Toshi A, Cipriani A, et al. Fluoxetine versus other types of pharmacotherapy for depression. <i>Cochrane Database of Systematic Reviews</i> [Internet]. 2013.                                                                                                                                                   |
| CSR | 64 | Ricci S, Dinia L, Del Sette M, Anzola P, Mazzoli T, Cenciarelli S, et al. Sonothrombolysis for acute ischaemic stroke. <i>Cochrane Database of Systematic Reviews</i> [Internet]. 2012.                                                                                                                                                                                   |
| CSR | 65 | Fisher Sheila A, Zhang H, Doree C, Mathur A, Martin-Rendon E. Stem cell treatment for acute myocardial infarction. <i>Cochrane Database of Systematic Reviews</i> [Internet]. 2015.                                                                                                                                                                                       |
| CSR | 66 | Daniels T, Mills N, Whitaker P. Nebuliser systems for drug delivery in cystic fibrosis. <i>Cochrane Database of Systematic Reviews</i> [Internet]. 2013.                                                                                                                                                                                                                  |
| CSR | 67 | Sickinger M-T, von Tresckow B, Kobe C, Engert A, Borchmann P, Skoetz N. Positron emission tomography-adapted therapy for first-line treatment in individuals with Hodgkin lymphoma. <i>Cochrane Database of Systematic Reviews</i> [Internet]. 2015.                                                                                                                      |
| CSR | 68 | Kavirajan Harish C, Lueck K, Chuang K. Alternating current cranial electrotherapy stimulation (CES) for depression. <i>Cochrane Database of Systematic Reviews</i> [Internet]. 2014.                                                                                                                                                                                      |
| CSR | 69 | Gupta Aditya K, Paquet M, Villanueva E, Brintnell W. Interventions for actinic keratoses. <i>Cochrane Database of Systematic Reviews</i> [Internet]. 2012.                                                                                                                                                                                                                |
| CSR | 70 | Khasraw M, Ameratunga Malaka S, Grant R, Wheeler H, Pavlakis N. Antiangiogenic therapy for high-grade glioma. <i>Cochrane Database of Systematic Reviews</i> [Internet]. 2014.                                                                                                                                                                                            |
| CSR | 71 | Leucht C, Huhn M, Leucht S. Amitriptyline versus placebo for major depressive disorder. <i>Cochrane Database of Systematic Reviews</i> [Internet]. 2012.                                                                                                                                                                                                                  |
| CSR | 72 | Malanda Uriëll L, Welschen Laura MC, Riphagen Ingrid I, Dekker Jacqueline M, Nijpels G, Bot Sandra DM. Self-monitoring of blood glucose in patients with type 2 diabetes mellitus who are not using insulin. <i>Cochrane Database of Systematic Reviews</i> [Internet]. 2012.                                                                                             |
| CSR | 73 | Povlsen B, Hansson T, Povlsen Sebastian D. Treatment for thoracic outlet syndrome. <i>Cochrane Database of Systematic Reviews</i> [Internet]. 2014.                                                                                                                                                                                                                       |
| CSR | 74 | Hofstede Stefanie N, Nouta Klaas A, Jacobs W, van Hooff Miranda L, Wymenga Ate B, Pijls Bart G, et al. Mobile bearing vs fixed bearing prostheses for posterior cruciate retaining total knee arthroplasty for postoperative functional status in patients with osteoarthritis and rheumatoid arthritis. <i>Cochrane Database of Systematic Reviews</i> [Internet]. 2015. |
| CSR | 75 | Visser J, Snel M, Van Vliet Huib AAM. Hormonal versus non-hormonal contraceptives in women with diabetes mellitus type 1 and 2. <i>Cochrane Database of Systematic Reviews</i> [Internet]. 2013.                                                                                                                                                                          |
| CSR | 76 | Kleinstäuber M, Witthöft M, Steffanowski A, van Marwijk H, Hiller W, Lambert Michael J. Pharmacological interventions for somatoform disorders in adults. <i>Cochrane Database of Systematic Reviews</i> [Internet]. 2014.                                                                                                                                                |
| CSR | 77 | Anderson-James S, Marchant Julie M, Acworth Jason P, Turner C, Chang Anne B. Inhaled corticosteroids for subacute cough in children. <i>Cochrane Database of Systematic Reviews</i> [Internet]. 2013.                                                                                                                                                                     |
| CSR | 78 | Tramm R, Ilic D, Davies Andrew R, Pellegrino Vincent A, Romero L, Hodgson C. Extracorporeal membrane oxygenation for critically ill adults. <i>Cochrane Database of Systematic Reviews</i> [Internet]. 2015.                                                                                                                                                              |



|     |     |                                                                                                                                                                                                                                                                                                                                  |
|-----|-----|----------------------------------------------------------------------------------------------------------------------------------------------------------------------------------------------------------------------------------------------------------------------------------------------------------------------------------|
| CSR | 79  | Scholefield B, Duncan H, Davies P, Gao Smith F, Khan K, Perkins Gavin D, et al. Hypothermia for neuroprotection in children after cardiopulmonary arrest. <i>Cochrane Database of Systematic Reviews</i> [Internet]. 2013.                                                                                                       |
| CSR | 80  | Prabhu Rama KR, Swaminathan N, Harvey Lisa A. Passive movements for the treatment and prevention of contractures. <i>Cochrane Database of Systematic Reviews</i> [Internet]. 2013.                                                                                                                                               |
| CSR | 81  | Kew Kayleigh M, Undela K, Kotorts I, Ferrara G. Macrolides for chronic asthma. <i>Cochrane Database of Systematic Reviews</i> [Internet]. 2015.                                                                                                                                                                                  |
| CSR | 82  | Segal D, MacDonald John K, Chande N. Low dose naltrexone for induction of remission in Crohn's disease. <i>Cochrane Database of Systematic Reviews</i> [Internet]. 2014.                                                                                                                                                         |
| CSR | 83  | Boonmak P, Boonmak S, Pattanittum P. High initial concentration versus low initial concentration sevoflurane for inhalational induction of anaesthesia. <i>Cochrane Database of Systematic Reviews</i> [Internet]. 2012.                                                                                                         |
| CSR | 84  | Hunt H, Stanworth S, Curry N, Woolley T, Cooper C, Ukoumunne O, et al. Thromboelastography (TEG) and rotational thromboelastometry (ROTEM) for trauma-induced coagulopathy in adult trauma patients with bleeding. <i>Cochrane Database of Systematic Reviews</i> [Internet]. 2015.                                              |
| CSR | 85  | Ells Louisa J, Mead E, Atkinson G, Corpeleijn E, Roberts K, Viner R, et al. Surgery for the treatment of obesity in children and adolescents. <i>Cochrane Database of Systematic Reviews</i> [Internet]. 2015.                                                                                                                   |
| CSR | 86  | Ali A, Hall I, Blickwedel J, Hassiotis A. Behavioural and cognitive-behavioural interventions for outwardly-directed aggressive behaviour in people with intellectual disabilities. <i>Cochrane Database of Systematic Reviews</i> [Internet]. 2015.                                                                             |
| CSR | 87  | Kiwanuka Suzanne N, Rutebemberwa E, Nalwadda C, Okui O, Ssenooba F, Kinengyere Alison A, et al. Interventions to manage dual practice among health workers. <i>Cochrane Database of Systematic Reviews</i> [Internet]. 2011.                                                                                                     |
| CSR | 88  | Vasudev A, Macritchie K, Rao Sanjay NK, Geddes J, Young Allan H. Tiagabine in the maintenance treatment of bipolar disorder. <i>Cochrane Database of Systematic Reviews</i> [Internet]. 2011.                                                                                                                                    |
| CSR | 89  | Daly C, Cody June D, Khan I, Rabindranath Kannaiyan S, Vale L, Wallace Sheila A. Double bag or Y-set versus standard transfer systems for continuous ambulatory peritoneal dialysis in end-stage kidney disease. <i>Cochrane Database of Systematic Reviews</i> [Internet]. 2014.                                                |
| CSR | 90  | Saldanha Ian J, Akinyede O, Robinson Karen A. Immunosuppressive drug therapy for preventing rejection following lung transplantation in cystic fibrosis. <i>Cochrane Database of Systematic Reviews</i> [Internet]. 2013.                                                                                                        |
| CSR | 91  | Bradt J, Dileo C, Shim M. Music interventions for preoperative anxiety. <i>Cochrane Database of Systematic Reviews</i> [Internet]. 2013.                                                                                                                                                                                         |
| CSR | 92  | Jacobs W, Van der Gaag Niels A, Tuschel A, de Kleuver M, Peul W, Verbout AJ, et al. Total disc replacement for chronic back pain in the presence of disc degeneration. <i>Cochrane Database of Systematic Reviews</i> [Internet]. 2012.                                                                                          |
| CSR | 93  | Wakai A, O'Sullivan R, McCabe A. Intra-articular lignocaine versus intravenous analgesia with or without sedation for manual reduction of acute anterior shoulder dislocation in adults. <i>Cochrane Database of Systematic Reviews</i> [Internet]. 2011.                                                                        |
| CSR | 94  | Chang Zhi H, Liu Zhao Y. Subintimal angioplasty for chronic lower limb arterial occlusion. <i>Cochrane Database of Systematic Reviews</i> [Internet]. 2013.                                                                                                                                                                      |
| CSR | 95  | Moja L, Lucenteforte E, Kwag Koren H, Bertele V, Campomori A, Chakravarthy U, et al. Systemic safety of bevacizumab versus ranibizumab for neovascular age-related macular degeneration. <i>Cochrane Database of Systematic Reviews</i> [Internet]. 2014.                                                                        |
| CSR | 96  | Robertson L, Roche A. Primary prophylaxis for venous thromboembolism in people undergoing major amputation of the lower extremity. <i>Cochrane Database of Systematic Reviews</i> [Internet]. 2013.                                                                                                                              |
| CSR | 97  | Magula N, Dediccoat M. Low dose versus high dose stavudine for treating people with HIV infection. <i>Cochrane Database of Systematic Reviews</i> [Internet]. 2015.                                                                                                                                                              |
| CSR | 98  | Ghamami N, Chiang Sandy Hsiang Y, Dormuth C, Wright James M. Time course for blood pressure lowering of dihydropyridine calcium channel blockers. <i>Cochrane Database of Systematic Reviews</i> [Internet]. 2014.                                                                                                               |
| SR  | 99  | Sculean A, Nikolidakis D, Nikou G, Ivanovic A, Chapple ILC, Stavropoulos A. Biomaterials for promoting periodontal regeneration in human intrabony defects: a systematic review. <i>Periodontology</i> 2000. 2015;68(1):182-216.                                                                                                 |
| SR  | 100 | Bright R, Hynes K, Gronthos S, Bartold PM. Periodontal ligament-derived cells for periodontal regeneration in animal models: a systematic review. <i>Journal Of Periodontal Research</i> . 2015;50(2):160-72.                                                                                                                    |
| SR  | 101 | Hernandez AV, Usmani A, Rajamanickam A, Moheet A. Thiazolidinediones and risk of heart failure in patients with or at high risk of type 2 diabetes mellitus: A meta-analysis and meta-regression analysis of placebo-controlled randomized clinical trials. <i>American Journal of Cardiovascular Drugs</i> . 2011;11(2):115-28. |
| SR  | 102 | Valery PC, Moore SP, Meiklejohn J, Bray F. International variations in childhood cancer in indigenous populations: A systematic review. <i>The Lancet Oncology</i> . 2014;15(2):e90-103.                                                                                                                                         |
| SR  | 103 | Kim SH, Stoicea N, Soghomonyan S, Bergese SD. Remifentanyl-Acute opioid tolerance and opioid-induced hyperalgesia: A systematic review. <i>American Journal of Therapeutics</i> . 2015;22(3):e62-e74.                                                                                                                            |



|    |     |                                                                                                                                                                                                                                                                                                                                                                                 |
|----|-----|---------------------------------------------------------------------------------------------------------------------------------------------------------------------------------------------------------------------------------------------------------------------------------------------------------------------------------------------------------------------------------|
| SR | 104 | Xiao X, Li L, Feng Y, Jiang YS, He QW, Tan XG, et al. Sevoflurane in the anesthesia of child short period surgery: A systematic review. <i>Chinese Journal of Evidence-Based Medicine</i> . 2011;11(10):1184-91.                                                                                                                                                                |
| SR | 105 | Ranjan A, Penninga E, Jelsig AM, Hasselbalch HC, Bjerrum OW. Inheritance of the chronic myeloproliferative neoplasms. A systematic review. <i>Clinical Genetics</i> . 2013;83(2):99-107.                                                                                                                                                                                        |
| SR | 106 | Usenbo A, Kramer V, Young T, Musekiwa A. Prevalence of arthritis in Africa: A systematic review and meta-analysis. <i>PLoS ONE</i> . 2015;10(8).                                                                                                                                                                                                                                |
| SR | 107 | Siebert W. Adhesions after previous cesarean section. Meta-analysis and systematic review. <i>Gynakologische Praxis</i> . 2012;36(2):336.                                                                                                                                                                                                                                       |
| SR | 108 | Drake MT, Murad MH, Mauck KF, Lane MA, Undavalli C, Elraiyah T, et al. Risk factors for low bone mass-related fractures in men: A systematic review and meta-analysis. <i>Journal of Clinical Endocrinology and Metabolism</i> . 2012;97(6):1861-70.                                                                                                                            |
| SR | 109 | Butler EN, Chawla N, Lund J, Harlan LC, Warren JL, Yabroff KR. Patterns of colorectal cancer care in the United States and Canada: A systematic review. <i>Journal of the National Cancer Institute</i> . 2013. p. 13-35.                                                                                                                                                       |
| SR | 110 | Montin L, Koivisto JM. Effectiveness of self-directed learning methods compared with other learning methods in nursing education related to nursing students' or registered nurses' learning outcomes: A systematic review protocol. <i>Journal of Systematic Reviews and Implementation Reports</i> . 2014;12(2):1-8.                                                          |
| SR | 111 | Jindal A, Bal A, Agarwal R. Inflammatory myofibroblastic tumor of the trachea in the pediatric age group: Case report and systematic review of the literature. <i>Journal of Bronchology and Interventional Pulmonology</i> . 2015;22(1):58-65.                                                                                                                                 |
| SR | 112 | Baldwin C, Brusco NK. The effect of vocational rehabilitation on return-to-work rates post stroke: A systematic review. <i>Topics in Stroke Rehabilitation</i> . 2011;18(5):562-72.                                                                                                                                                                                             |
| SR | 113 | Sundar S, Wu J, Hillaby K, Yap J, Lilford R. A systematic review evaluating the relationship between progression free survival and post progression survival in advanced ovarian cancer. <i>Gynecologic Oncology</i> . 2012;125(2):493-9.                                                                                                                                       |
| SR | 114 | Detjen AK, DiNardo AR, Leyden J, Steingart KR, Menzies D, Schiller I, et al. Xpert MTB/RIF for the diagnosis of tuberculosis in children-a systematic review and meta-analysis. <i>American Journal of Tropical Medicine and Hygiene</i> . 2013;89(5):418-9.                                                                                                                    |
| SR | 115 | Bellemain-Appaix A, O'Connor SA, Silvain J, Cucherat M, Beygui F, Barthélémy O, et al. Association of clopidogrel pretreatment with mortality, cardiovascular events, and major bleeding among patients undergoing percutaneous coronary intervention: A systematic review and meta-analysis. <i>JAMA - Journal of the American Medical Association</i> . 2012;308(23):2507-17. |
| SR | 116 | Liese J, Ulrich F, Schreckenbach T, Wahle M, Zeuzem S, Bechstein WO, et al. A rare cause of acute liver failure: Adult onset still's disease-case report and systematic review of the literature. <i>Transplant International</i> . 2011;24:237.                                                                                                                                |
| SR | 117 | Davie A, Damera V, Bianic F, Ricci J, Bernhardt P, Gokhale S, et al. CNI-related renal impairment in liver transplantation: A comparison of cyclosporine and tacrolimus-based regimens. <i>American Journal of Transplantation</i> . 2013;13:533.                                                                                                                               |
| SR | 118 | Loar J. Diagnostic accuracy and radiation dose of CT coronary angiography in atrial fibrillation: Systematic review and meta-analysis: Vorre MM, Abdulla J. <i>Radiology</i> 2013;267:376-86. <i>Journal of Emergency Medicine</i> . 2013;45(2):308.                                                                                                                            |
| SR | 119 | Sharma V, Deo SV, Altarabsheh SE, Cho YH, Erwin PJ, Park SJ. Comparison of the early haemodynamics of stented pericardial and porcine aortic valves. <i>European Journal of Cardio-thoracic Surgery</i> . 2014;47(1):4-10.                                                                                                                                                      |
| SR | 120 | Van Tuyl LH, Lems WF, Boers M. Measurement of stiffness in patients with rheumatoid arthritis in low disease activity or remission: A systematic review. <i>BMC Musculoskeletal Disorders</i> . 2014;15(1).                                                                                                                                                                     |
| SR | 121 | Shumay D, Del Gaudio F, Melisko M, Dunn L. Factors related to fear of recurrence in breast cancer survivors. <i>Psycho-Oncology</i> . 2013;22:134.                                                                                                                                                                                                                              |
| SR | 122 | Rawlinson A, Kitchingham N, Hart C, McMahon G, Ong SL, Khanna A. Mechanisms of reducing postoperative pain, nausea and vomiting: A systematic review of current techniques. <i>Evidence-Based Medicine</i> . 2012;17(3):75-80.                                                                                                                                                  |
| SR | 123 | Chen L, Xiao-Qing Z, Qin L, Hong W. Influencing factors related to sun protection in children and adolescents: A systematic review. <i>Chinese Journal of Evidence-Based Medicine</i> . 2014;14(12):1429-33.                                                                                                                                                                    |
| SR | 124 | Qin SY, Jiang HX, Ning HJ, Nie HM, Tao L, Hu BL, et al. Effect of Helicobacter pylori eradication on blood ammonia levels in cirrhotic patients: A systematic review. <i>Hepato-Gastroenterology</i> . 2012;59(120):2576-81.                                                                                                                                                    |
| SR | 125 | Müller SA, Vavken P, Pagenstert G. Simulated activity but real trauma: A systematic review on nintendo wii injuries based on a case report of an acute anterior cruciate ligament rupture. <i>Medicine (United States)</i> . 2015;94(12):e648.                                                                                                                                  |
| SR | 126 | Kim S-H, Lilot M, Sidhu KS, Rinehart J, Yu Z, Canales C, et al. Accuracy and precision of continuous noninvasive arterial pressure monitoring compared with invasive arterial pressure: a systematic review and meta-analysis. <i>Anesthesiology</i> . 2014;120(5):1080-97.                                                                                                     |
| SR | 127 | Nickerson JW, Chackungal S, Knowlton L, McQueen K, Burkle FM. Surgical care during humanitarian crises: a systematic review of published surgical caseload data from foreign medical teams. <i>Prehospital And Disaster Medicine</i> . 2012;27(2):184-9.                                                                                                                        |
| SR | 128 | Zulman DM, Sussman JB, Chen X, Cigolle CT, Blaum CS, Hayward RA. Examining the evidence: A systematic review of the inclusion and analysis of older adults in randomized controlled trials. <i>Journal of General Internal Medicine</i> . 2011;26(7):783-90.                                                                                                                    |
| SR | 129 | Singh S, Venkatesh SK, Wang Z, Miller FH, Motosugi U, Low RN, et al. Diagnostic performance of magnetic resonance elastography in staging liver fibrosis: A systematic                                                                                                                                                                                                          |

|    |     |                                                                                                                                                                                                                                                                                                                              |
|----|-----|------------------------------------------------------------------------------------------------------------------------------------------------------------------------------------------------------------------------------------------------------------------------------------------------------------------------------|
|    |     | review and meta-analysis of individual participant data. <i>Clinical Gastroenterology and Hepatology</i> . 2015;13(3):440-51.                                                                                                                                                                                                |
| SR | 130 | Hergan D, Thut D, Sherman O, Day MS. Meniscal allograft transplantation. <i>Arthroscopy - Journal of Arthroscopic and Related Surgery</i> . 2011;27(1):101-12.                                                                                                                                                               |
| SR | 131 | Gong Z, Zhao D. Cardiovascular diseases and risk factors among Chinese immigrants. <i>Internal And Emergency Medicine</i> . 2015.                                                                                                                                                                                            |
| SR | 132 | Jordan SJ, Nagle CM, Coory MD, Maresco D, Protani MM, Pandeya NA, et al. Has the association between hysterectomy and ovarian cancer changed over time? A systematic review and meta-analysis. <i>European Journal of Cancer</i> . 2013;49(17):3638-47.                                                                      |
| SR | 133 | Lalidou F, Kolios G, Tavridou A, Drosos GI. Bone grafts as carriers for local antibiotic delivery for the treatment and prevention of bone infections. <i>Surgical Technology International</i> . 2014;25:239-45.                                                                                                            |
| SR | 134 | Cheng S, Grasso L, Martinez-Orozco JA, Al-Agha R, Pivonello R, Colao A, et al. Pregnancy in acromegaly: Experience from two referral centers and systematic review of the literature. <i>Clinical Endocrinology</i> . 2012;76(2):264-71.                                                                                     |
| SR | 135 | Wu F, Weng S, Li C, Sun J, Li L, Gao Q. Submandibular gland transfer for the prevention of postradiation xerostomia in patients with head and neck cancer: A systematic review and meta-analysis. <i>ORL</i> . 2015;77(2):70-86.                                                                                             |
| SR | 136 | Torné R, Rodríguez-Hernández A, Bernard T, Arian Abelló F, Vilalta Castan J, Sahuquillo J. Subarachnoid hemorrhage in systemic lupus erythematosus: Systematic review and report of three cases. <i>Clinical Neurology and Neurosurgery</i> . 2015;128:17-24.                                                                |
| SR | 137 | Jokiniemi K, Pietilä A-M, Kylmä J, Haatainen K. Advanced nursing roles: a systematic review. <i>Nursing &amp; Health Sciences</i> . 2012;14(3):421-31.                                                                                                                                                                       |
| SR | 138 | Gerstner D, Walser S, Brenner B, Büniger J, Eikmann T, Raulf-Heimsoth M, et al. Health relevance of exposure to bioaerosols. <i>Allergologie</i> . 2014;37(5):190-7.                                                                                                                                                         |
| SR | 139 | Kurth E, Kennedy HP, Spichiger E, Hösli I, Zemp Stutz E. Crying babies, tired mothers: What do we know? A systematic review. <i>Midwifery</i> . 2011;27(2):187-94.                                                                                                                                                           |
| SR | 140 | Cook DA, Brydges R, Zendejas B, Hamstra SJ, Hatala R. Technology-enhanced simulation to assess health professionals: A systematic review of validity evidence, research methods, and reporting quality. <i>Academic Medicine</i> . 2013;88(6):872-83.                                                                        |
| SR | 141 | Xia L, Wang X, Xu T, Zhang X, Zhu Z, Qin L, et al. Robotic versus open radical cystectomy: An updated systematic review and meta-analysis. <i>PLoS ONE</i> . 2015;10(3).                                                                                                                                                     |
| SR | 142 | Taylor RS, Desai MJ, Rigoard P, Taylor RJ. Predictors of pain relief following spinal cord stimulation in chronic back and leg pain and failed back surgery syndrome: A systematic review and meta-regression analysis. <i>Pain Practice</i> . 2014;14(6):489-505.                                                           |
| SR | 143 | Manouchehri N, Birch DW, Shi X, Hadi G, Karmali S. Heated versus cold insufflation for minimally invasive abdominal surgery has minimal benefit on patient outcomes. <i>Surgical Endoscopy and Other Interventional Techniques</i> . 2011;25:S346.                                                                           |
| SR | 144 | Chiappini E, Accetta G, Bonsignori F, Boddp V, Galli L, Biggeri A, et al. Interferon-γ release assays for the diagnosis of mycobacterium tuberculosis infection in children: A systematic review and meta-analysis. <i>International Journal of Immunopathology and Pharmacology</i> . 2012;25(3):557-64.                    |
| SR | 145 | Carson SJ. Limited evidence for existing caries assessment systems. <i>Evidence-Based Dentistry</i> . 2013;14(1):10-1.                                                                                                                                                                                                       |
| SR | 146 | Siriwardhana C, Ali SS, Roberts B, Stewart R. A systematic review of resilience and mental health outcomes of conflict-driven adult forced migrants. <i>Conflict And Health</i> . 2014;8:13.                                                                                                                                 |
| SR | 147 | Chamberlain C, McNamara B, Williams ED, Yore D, Oldenburg B, Oats J, et al. Diabetes in pregnancy among indigenous women in australia, canada, new zealand and the united states: A systematic review of the evidence for screening in early pregnancy. <i>Diabetes/Metabolism Research and Reviews</i> . 2013;29(4):241-56. |
| SR | 148 | Leadley RM, Armstrong N, Lee YC, Allen A, Kleijnen J. Chronic diseases in the European Union: The prevalence and health cost implications of chronic pain. <i>Journal of Pain and Palliative Care Pharmacotherapy</i> . 2012;26(4):310-25.                                                                                   |
| SR | 149 | Xiangjun K. To ensure all ward 22a patients on atypical antipsychotics are monitored according to protocol. <i>Annals of the Academy of Medicine Singapore</i> . 2012;41(9):S181.                                                                                                                                            |
| SR | 150 | Weatherley ND, Jackson PR. The new Sheffield risk and benefit tables for the elderly. <i>QJM</i> . 2011;104(1):3-12.                                                                                                                                                                                                         |
| SR | 151 | Srigley JA, Lightfoot D, Fernie G, Gardam M, Muller MP. Hand hygiene monitoring technology: protocol for a systematic review. <i>Systematic reviews</i> . 2013;2:101.                                                                                                                                                        |
| SR | 152 | Morgan JL, Thomas K, Braungart S, Nelson RL. Transparent cap colonoscopy versus standard colonoscopy: A systematic review and meta-analysis. <i>Techniques in Coloproctology</i> . 2013;17(4):353-60.                                                                                                                        |
| SR | 153 | Hahn A, Jochai D, Caufield-Noll C, Rios R, Allen L, Cordts G. Self inflicted burns: A systematic review of the literature. <i>Journal of Burn Care and Research</i> . 2012;33(2):S181.                                                                                                                                       |
| SR | 154 | <i>Canadian Respiratory Journal</i> . 2013;20(2).                                                                                                                                                                                                                                                                            |
| SR | 155 | Dawe SR, Windsor JA, Broeders JAJL, Cregan PC, Hewett PJ, Maddern GJ. A systematic review of surgical skills transfer after simulation-based training: Laparoscopic cholecystectomy and endoscopy. <i>Annals of Surgery</i> . 2014;259(2):236-48.                                                                            |
| SR | 156 | Xiong C, Liu G, Ma R, Xue J, Wu A. Efficacy of palonosetron for preventing postoperative nausea and vomiting: a systematic review and meta-analysis. <i>Canadian Journal of Anesthesia</i> . 2015.                                                                                                                           |
| SR | 157 | O'Horo JC, Silva GLM, Silvia Munoz-Price L, Safdar N. The efficacy of daily bathing with chlorhexidine for reducing healthcare-associated bloodstream infections: A meta-analysis. <i>Infection Control and Hospital Epidemiology</i> . 2012;33(3):257-67.                                                                   |

|    |     |                                                                                                                                                                                                                                                                              |
|----|-----|------------------------------------------------------------------------------------------------------------------------------------------------------------------------------------------------------------------------------------------------------------------------------|
| SR | 158 | Rehm J, Kailasapillai S, Larsen E, Rehm MX, Samokhvalov AV, Shield KD, et al. A systematic review of the epidemiology of unrecorded alcohol consumption and the chemical composition of unrecorded alcohol. <i>Addiction (Abingdon, England)</i> . 2014;109(6):880-93.       |
| SR | 159 | Schadewaldt V, McInnes E, Hiller JE, Gardner A. Views and experiences of nurse practitioners and medical practitioners with collaborative practice in primary health care - an integrative review. <i>BMC Family Practice</i> . 2013;14:132-.                                |
| SR | 160 | Hao Z, Yang C, Liu M, Wu B. Renal dysfunction and thrombolytic therapy in patients with acute ischemic stroke: A systematic review and meta-analysis. <i>Medicine (United States)</i> . 2014;93(28):e286.                                                                    |
| SR | 161 | Kishi T, Matsunaga S, Iwata N. Suvorexant for primary insomnia: A systematic review and meta-analysis of randomized placebo-controlled trials. <i>PLoS ONE</i> . 2015;10(8).                                                                                                 |
| SR | 162 | Jones CJ, Smith HE, Llewellyn CD. A systematic review of the effectiveness of interventions using the Common Sense Self-Regulatory Model to improve adherence behaviours. <i>Journal Of Health Psychology</i> . 2015.                                                        |
| SR | 163 | White A. Outpatient interventions for hepatology patients with fluid retention: a review and synthesis of the literature. <i>Gastroenterology Nursing: The Official Journal Of The Society Of Gastroenterology Nurses And Associates</i> . 2014;37(3):236-44.                |
| SR | 164 | Williams M, Lewis L, McKeough Z, Holland A, Lee A, McNamara R, et al. Association between exercise session attendance and improvements in exercise outcomes in people with COPD. <i>Respirology</i> . 2013;18:56.                                                            |
| SR | 165 | Heck E, Jaworska N, DeSomma E, Dhoopar AS, MacMaster FP, Dewey D, et al. A survey of mental health services at post-secondary institutions in Alberta. <i>Canadian Journal of Psychiatry</i> . 2014;59(5):250-8.                                                             |
| SR | 166 | Renzaho AMN, Romios P, Crock C, Sønderlund AL. The effectiveness of cultural competence programs in ethnic minority patient-centered health care-a systematic review of the literature. <i>International Journal for Quality in Health Care</i> . 2013;25(3):261-9.          |
| SR | 167 | Soong JL, Lim WH. Vasopressin and terlipressin in the treatment of vasodilatory septic shock: A systematic review. <i>Proceedings of Singapore Healthcare</i> . 2011;20(3):208-18.                                                                                           |
| SR | 168 | Sexton CE, Betts JF, Demnitz N, Dawes H, Ebmeier KP, Johansen-Berg H. A systematic review of MRI studies examining the relationship between physical fitness and activity and the white matter of the ageing brain. <i>Neuroimage</i> . 2015.                                |
| SR | 169 | Foroozan M, Beauchet A, Funck-Brentano E, Sei JF, Saiag P. Current evidence on recurrence rate of basal cell and squamous cell carcinomas treated by Mohs micrographic surgery: Systematic review. <i>Journal of the American Academy of Dermatology</i> . 2014;70(5):AB195. |
| SR | 170 | Zhang Q, Li J, Liu F, Li Z. Comments on Li H et al. "A systematic review of matrix metalloproteinase 9 as a biomarker of survival in patients with osteosarcoma". <i>Tumor Biology</i> . 2014;36(1):5-6.                                                                     |
| SR | 171 | Coghill D, Banaschewski T, Zuddas A, Pelaz A, Gagliano A, Doepfner M. Long-acting methylphenidate formulations in the treatment of attention-deficit/hyperactivity disorder: A systematic review of head-to-head studies. <i>BMC Psychiatry</i> . 2013;13.                   |
| SR | 172 | Sacchetti M, Mantelli F, Lambiasi A, Mastropasqua A, Merlo D, Bonini S. Systematic review of randomised clinical trials on topical ciclosporin a for the treatment of dry eye disease. <i>British Journal of Ophthalmology</i> . 2014;98(8):1016-22.                         |
| SR | 173 | Cramer JA, Sapin C, François C. Indirect comparison of clobazam and other therapies for Lennox-Gastaut syndrome. <i>Acta Neurologica Scandinavica</i> . 2013;128(2):91-9.                                                                                                    |
| SR | 174 | Rueda-Ochoa OL, Munoz-Suarez D, Calvo-Betancourt L, Lopez E, Vargas C, Delgado M, et al. Heart rate variability as a prognostic marker of mortality in patients with myocardial infarction systematic review and meta-analysis. <i>Europace</i> . 2012;14:iv31.              |
| SR | 175 | Hatfield G, Hammond C, Hunt MA. Clinical tests of balance in the knee osteoarthritis population: A systematic review. <i>Osteoarthritis and Cartilage</i> . 2015;23:A374.                                                                                                    |
| SR | 176 | Christopher N, Mehta N, Sinert R. Systematic review: Lung ultrasound for the diagnosis of pneumonia in the emergency department. <i>Academic Emergency Medicine</i> . 2014;21(5):S36.                                                                                        |
| SR | 177 | Nettis E, Delle Donne P, Di Leo E, Calogiuri GF, Ferrannini A, Vacca A. Rupatadine for the treatment of urticaria. <i>Expert Opinion on Pharmacotherapy</i> . 2013;14(13):1807-13.                                                                                           |
| SR | 178 | Zeiler FA, Zeiler KJ, Teitelbaum J, Gillman LM, West M. VNS for refractory status epilepticus. <i>Epilepsy Research</i> . 2015;112:100-13.                                                                                                                                   |
| SR | 179 | Sofaer N, Strech D. The need for systematic reviews of reasons. <i>Bioethics</i> . 2012;26(6):315-28.                                                                                                                                                                        |
| SR | 180 | Leclère C, Viaux S, Avril M, Achard C, Chetouani M, Missonnier S, et al. Why synchrony matters during mother-child interactions: A systematic review. <i>PLoS ONE</i> . 2014;9(12).                                                                                          |
| SR | 181 | Patel V, Patel P, Dawson J. Comment on: Non-infectious pulmonary toxicity of rituximab: A systematic review. <i>Rheumatology (United Kingdom)</i> . 2012;51(11):2111-2.                                                                                                      |
| SR | 182 | O'Sullivan KE, Hurley ET, Segurado R, Sugrue D, Hurley JP. Transaortic TAVI is a valid alternative to transapical approach. <i>Journal of Cardiac Surgery</i> . 2015;30(5):381-90.                                                                                           |
| SR | 183 | Tseng S-H, Chen H-C, Tam K-W. Systematic review and meta-analysis of the effect of equine assisted activities and therapies on gross motor outcome in children with cerebral palsy. <i>Disability And Rehabilitation</i> . 2013;35(2):89-99.                                 |
| SR | 184 | Jayakrishnan TT, Groeschl RT, George B, Thomas JP, Pappas S, Gamblin TC, et al. Management of acute cholecystitis in cancer patients: A comparative effectiveness approach. <i>Surgical Endoscopy and Other Interventional Techniques</i> . 2014;28(5):1505-14.              |
| SR | 185 | Alves GS, Oertel Knöchel V, Knöchel C, Carvalho AF, Pantel J, Engelhardt E, et al. Integrating retrogenesis theory to alzheimer's disease pathology: Insight from DTI-TBSS                                                                                                   |

|    |     |                                                                                                                                                                                                                                                                                                                                                                                                                                                                       |
|----|-----|-----------------------------------------------------------------------------------------------------------------------------------------------------------------------------------------------------------------------------------------------------------------------------------------------------------------------------------------------------------------------------------------------------------------------------------------------------------------------|
|    |     | investigation of the white matter microstructural integrity. <i>BioMed Research International</i> . 2015;2015.                                                                                                                                                                                                                                                                                                                                                        |
| SR | 186 | Huster KM, Müller A, Prohn MJ, Nowak D, Herbig B. Medical risks in older pilots: a systematic review on incapacitation and age. <i>International archives of occupational and environmental health</i> . 2014;87(6):567-78.                                                                                                                                                                                                                                           |
| SR | 187 | Alcaraz A, González-Zuelgaray J, Augustovski F. Cost-effectiveness of cardioverter defibrillators in patients with risk factors for sudden death in Argentina. <i>Value in Health</i> . 2011;14(5 SUPPL.):S33-S8.                                                                                                                                                                                                                                                     |
| SR | 188 | Lopez A, Billioud V, Peyrin-Biroulet C, Peyrin-Biroulet L. Adherence to anti-TNF therapy in inflammatory bowel diseases: A systematic review. <i>Inflammatory Bowel Diseases</i> . 2013;19(7):1528-33.                                                                                                                                                                                                                                                                |
| SR | 189 | Khan M, Wendel C, Thai H, Movahed M. Failed percutaneous recanalization of chronic total occlusion is associated with higher in-hospital mortality: A systematic review and meta-analysis of the literature. <i>Catheterization and Cardiovascular Interventions</i> . 2013;81:S33-S4.                                                                                                                                                                                |
| SR | 190 | Neville CE, McKinley MC, Holmes VA, Spence D, Woodside JV. The relationship between breastfeeding and postpartum weight change-a systematic review and critical evaluation. <i>International Journal of Obesity</i> . 2014;38(4):577-90.                                                                                                                                                                                                                              |
| SR | 191 | Hawley G, Janamian T, Jackson C, Wilkinson SA. In a maternity shared-care environment, what do we know about the paper hand-held and electronic health record: A systematic literature review. <i>BMC Pregnancy and Childbirth</i> . 2014;14(1).                                                                                                                                                                                                                      |
| SR | 192 | Raja FA, Counsell N, Colombo N, Pfisterer J, du Bois A, Parmar MK, et al. Platinum versus platinum-combination chemotherapy in platinum-sensitive recurrent ovarian cancer: A meta-analysis using individual patient data. <i>Annals of Oncology</i> . 2013;24(12):3028-34.                                                                                                                                                                                           |
| SR | 193 | Lipka S, Rabbanifard R, Kumar A, Brady P. Single versus double balloon enteroscopy for small bowel diagnostics: A systematic review and meta-analysis. <i>Journal of Clinical Gastroenterology</i> . 2015;49(3):177-84.                                                                                                                                                                                                                                               |
| SR | 194 | Wilhelm B, Rajić A, Greig JD, Waddell L, Harris J. The effect of Hazard analysis critical control point programs on microbial contamination of carcasses in abattoirs: A systematic review of published data. <i>Foodborne Pathogens and Disease</i> . 2011;8(9):949-60.                                                                                                                                                                                              |
| SR | 195 | Hurst KV, Lee R, Milosevic I, Handa A. Re: 'Efficacy and Safety of the New Oral Anticoagulants Dabigatran, Rivaroxaban, Apixaban, and Edoxaban in the Treatment and Secondary Prevention of Venous Thromboembolism: A Systematic Review and Meta-analysis of Phase III Trials'- Key Learning Points for Surgeons. <i>European Journal Of Vascular And Endovascular Surgery: The Official Journal Of The European Society For Vascular Surgery</i> . 2015;50(1):126-7. |
| SR | 196 | Antony AK, Hootnick JL, Antony AK. Ulnar forearm free flaps in head and neck reconstruction: systematic review of the literature and a case report. <i>Microsurgery</i> . 2014;34(1):68-75.                                                                                                                                                                                                                                                                           |
| SR | 197 | Pantelic M, Shenderovich Y, Cluver L, Boyes M. Predictors of internalised HIV-related stigma: a systematic review of studies in sub-Saharan Africa. <i>Health Psychology Review</i> . 2015:1-22.                                                                                                                                                                                                                                                                      |
| SR | 198 | Zhang Z, Xu J, Yao Y, Chu S, Cheng H, Chen D, et al. Giant cell tumors of the skull: A series of 18 cases and review of the literature. <i>Journal of Neuro-Oncology</i> . 2013;115(3):437-44.                                                                                                                                                                                                                                                                        |
| SR | 199 | Freedman OC, Fletcher GG, Gandhi S, Mates M, Dent SF, Trudeau ME, et al. Adjuvant endocrine therapy for early breast cancer: A systematic review of the evidence for the 2014 cancer care Ontario systemic therapy guideline. <i>Current Oncology</i> . 2015;22:S95-S113.                                                                                                                                                                                             |
| SR | 200 | Carr HJ, McDermott A, Tadbiri H, Uebbing AM, Londrigan M. The effectiveness of computer-based learning in hospitalized adults with heart failure on knowledge, re-admission, self-care, quality of life and patient satisfaction: A systematic review. <i>JBI Database of Systematic Reviews and Implementation Reports</i> . 2014;12(5):430-65.                                                                                                                      |
| SR | 201 | Frank M, Mittendorf T. Influence of pharmacogenomic profiling prior to pharmaceutical treatment in metastatic colorectal cancer on cost effectiveness: A systematic review. <i>PharmacoEconomics</i> . 2013;31(3):215-28.                                                                                                                                                                                                                                             |
| SR | 202 | Do Nascimento FV, Piccoli V, Beer MA, Von Frankenberg AD, Crispim D, Gerchman F. Association of HSD11B1 polymorphic variants and adipose tissue gene expression with metabolic syndrome, obesity and type 2 diabetes mellitus: A systematic review. <i>Diabetology and Metabolic Syndrome</i> . 2015;7(1).                                                                                                                                                            |
| SR | 203 | McKay AJ, Mahesh PA, Fordham JZ, Majeed A. Prevalence of COPD in India: A systematic review. <i>Primary Care Respiratory Journal</i> . 2012;21(3):313-21.                                                                                                                                                                                                                                                                                                             |
| SR | 204 | Córdoba-Soriano JG, Puri R, Amat-Santos I, Ribeiro HB, Abdul-Jawad Altisent O, del Trigo M, et al. Valve thrombosis following transcatheter aortic valve implantation: a systematic review. <i>Revista Española De Cardiología (English Ed)</i> . 2015;68(3):198-204.                                                                                                                                                                                                 |
| SR | 205 | Tan A, Tan DT, Tan X-W, Mehta JS. Osteo-odonto keratoprosthesis: systematic review of surgical outcomes and complication rates. <i>The Ocular Surface</i> . 2012;10(1):15-25.                                                                                                                                                                                                                                                                                         |
| SR | 206 | Sommerville EW, Chinnery PF, Gorman GS, Taylor RW. Genotypic and phenotypic heterogeneity in adult-onset progressive external ophthalmoplegia (PEO) with mitochondrial DNA instability: A systematic review. <i>Neuromuscular Disorders</i> . 2014;24:S15.                                                                                                                                                                                                            |
| SR | 207 | Lippi G, Mattiuzzi C, Franchini M. Sleep apnea and venous thromboembolism. A systematic review. <i>Thrombosis And Haemostasis</i> . 2015;114(4).                                                                                                                                                                                                                                                                                                                      |



|    |     |                                                                                                                                                                                                                                                                                                                                                                |
|----|-----|----------------------------------------------------------------------------------------------------------------------------------------------------------------------------------------------------------------------------------------------------------------------------------------------------------------------------------------------------------------|
| SR | 208 | Van Loo HM, de Jonge P, Romeijn J-W, Kessler RC, Schoevers RA. Data-driven subtypes of major depressive disorder: a systematic review. <i>BMC Medicine</i> . 2012;10:156-.                                                                                                                                                                                     |
| SR | 209 | Kriza C, Emmert M, Wahlster P, Niederländer C, Kolominsky-Rabas P. A comparison of the main cost-effectiveness drivers of virtual colonography versus conventional colonoscopy for colorectal cancer screening: An international review. <i>Annals of Oncology</i> . 2013;24:iv120.                                                                            |
| SR | 210 | De Ruijter RAG, Stegenga B, Schaub RMH, Reneman MF, Middel B. Determinants of physical and mental health complaints in dentists: a systematic review. <i>Community Dentistry And Oral Epidemiology</i> . 2015;43(1):86-96.                                                                                                                                     |
| SR | 211 | Leitmeyer K. European risk assessment guidance for infectious diseases transmitted on aircraft—the RAGIDA project. <i>Euro Surveillance: Bulletin Européen Sur Les Maladies Transmissibles = European Communicable Disease Bulletin</i> . 2011;16(16).                                                                                                         |
| SR | 212 | Fitzharris M, Yu J, Hammond N, Taylor C, Wu Y, Finfer S, et al. Injury in China: A systematic review of injury surveillance studies conducted in Chinese hospital emergency departments. <i>BMC Emergency Medicine</i> . 2011;11.                                                                                                                              |
| SR | 213 | Linhares AC, Stupka JA, Ciapponi A, Bardach AE, Glujovsky D, Aruj PK, et al. Burden and typing of rotavirus group A in Latin America and the Caribbean: Systematic review and meta-analysis. <i>Reviews in Medical Virology</i> . 2011;21(2):89-109.                                                                                                           |
| SR | 214 | Billeci L, Sicca F, Maharatna K, Apicella F, Narzisi A, Campatelli G, et al. On the application of Quantitative EEG for characterizing autistic brain: A systematic review. <i>Frontiers in Human Neuroscience</i> . 2013(JUL).                                                                                                                                |
| SR | 215 | Sendt KV, Tracy DK, Bhattacharyya S. A systematic review of factors influencing adherence to antipsychotic medication in schizophrenia-spectrum disorders. <i>Psychiatry Research</i> . 2015;225(1-2):14-30.                                                                                                                                                   |
| SR | 216 | Johnson RF, Gustin J. Acute renal failure requiring renal replacement therapy in the intensive care unit: Impact on prognostic assessment for shared decision making. <i>Journal of Palliative Medicine</i> . 2011;14(7):883-9.                                                                                                                                |
| SR | 217 | Wang H, Chen T, Wang H, Song Y, Li X, Wang J. A systematic review of the physiological and operative severity score for the enumeration of mortality and morbidity and its Portsmouth modification as predictors of post-operative morbidity and mortality in patients undergoing pancreatic surgery. <i>American Journal of Surgery</i> . 2013;205(4):466-72. |
| SR | 218 | Bose H. Role of occupational therapy in dysphagia management for children with special needs. <i>Archives of Physical Medicine and Rehabilitation</i> . 2013;94(10):e60.                                                                                                                                                                                       |
| SR | 219 | Cervero RM, Gaines JK. The impact of CME on physician performance and patient health outcomes: an updated synthesis of systematic reviews. <i>The Journal Of Continuing Education In The Health Professions</i> . 2015;35(2):131-8.                                                                                                                            |
| SR | 220 | Marta GN, Riera R, Macedo CR, De Castro Jr G, Carvalho AL, Kowalski LP. Induction chemotherapy prior to surgery with or without postoperative radiotherapy for oral cavity cancer patients: Systematic review and meta-analysis. <i>Head and Neck</i> . 2015;37:E187.                                                                                          |
| SR | 221 | Peña L, Moreno CB, Gutierrez-Alvarez AM. Pain management in Guillain-Barre syndrome: A systematic review. <i>Neurologia (Barcelona, Spain)</i> . 2014.                                                                                                                                                                                                         |
| SR | 222 | Patil AS, Martin J, Tsukahara K, Skljarevski A, Miller K, Towns R, et al. Pseudomonoamniotic Pregnancy: Case Report and Review of Etiologic Considerations. <i>Fetal and Pediatric Pathology</i> . 2015.                                                                                                                                                       |
| SR | 223 | Visser BJ, Wieten RW, Kroon D, Nagel IM, Bélard S, van Vugt M, et al. Efficacy and safety of artemisinin combination therapy (ACT) for non-falciparum malaria: a systematic review. <i>Malaria Journal</i> . 2014;13:463-.                                                                                                                                     |
| SR | 224 | Booksmythe I, Mautz B, Davis J, Nakagawa S, Jennions MD. Facultative adjustment of the offspring sex ratio and male attractiveness: a systematic review and meta-analysis. <i>Biological Reviews Of The Cambridge Philosophical Society</i> . 2015.                                                                                                            |
| SR | 225 | Liu YF, Dong H, Chen Z, Wang Y, Tu SH. Impact of ankylosing spondylitis on sexual function: A systematic review and meta analysis. <i>Experimental and Therapeutic Medicine</i> . 2015;9(4):1501-7.                                                                                                                                                            |
| SR | 226 | Rathbone J, Kaltenthaler E, Richards A, Tappenden P, Bessey A, Cantrell A. A systematic review of eculizumab for atypical haemolytic uraemic syndrome (aHUS). <i>BMJ Open</i> . 2013;3(11).                                                                                                                                                                    |
| SR | 227 | Konno R, Kang HS, Makimoto K. The best evidence for minimizing resistance-to-care during assisted personal care for older adults with dementia in nursing homes: A systematic review. <i>JBHI Database of Systematic Reviews and Implementation Reports</i> . 2012;10(58):4622-32.                                                                             |
| SR | 228 | Lee MR, Unger JG, Rohrich RJ. Management of the nasal dorsum in rhinoplasty: a systematic review of the literature regarding technique, outcomes, and complications. <i>Plastic and reconstructive surgery</i> . 2011;128(5):538e-50e.                                                                                                                         |
| SR | 229 | Broeders JAJL, Roks DJGH, Ahmed Ali U, Draaisma WA, Smout AJPM, Hazebroek EJ. Laparoscopic anterior versus posterior fundoplication for gastroesophageal reflux disease: Systematic review and meta-analysis of randomised trials. <i>Surgical Endoscopy and Other Interventional Techniques</i> . 2012;26:S2.                                                 |
| SR | 230 | Jia Y, Chen C, Ng CS, Leung SW. Meta-analysis of randomized controlled trials on the efficacy of Di'ao Xinxuekang capsule and isosorbide dinitrate in treating angina pectoris. <i>Evidence-based Complementary and Alternative Medicine</i> . 2012;2012.                                                                                                      |
| SR | 231 | Chiappini E, Accetta G, Bonsignori F, Boddp V, Galli L, Biggeri A, et al. Interferon-γ release assays for the diagnosis of mycobacterium tuberculosis infection in children: A systematic review and meta-analysis. <i>International Journal of Immunopathology and Pharmacology</i> . 2012;25(3):557-64.                                                      |

|    |     |                                                                                                                                                                                                                                                                                                         |
|----|-----|---------------------------------------------------------------------------------------------------------------------------------------------------------------------------------------------------------------------------------------------------------------------------------------------------------|
| SR | 232 | Elnahas A, Graybiel K, Farrokhhyar F, Gmora S, Anvari M, Hong D. Revisional surgery after failed laparoscopic adjustable gastric banding: A systematic review. <i>Surgical Endoscopy and Other Interventional Techniques</i> . 2013;27(3):740-5.                                                        |
| SR | 233 | Noyes AM, Thompson PD. A systematic review of the time course of atherosclerotic plaque regression. <i>Atherosclerosis</i> . 2014;234(1):75-84.                                                                                                                                                         |
| SR | 234 | Al-Moraissi EA, El-Sharkawy TM, El-Ghareeb TI, Chrcanovic BR. Three-dimensional versus standard miniplate fixation in the management of mandibular angle fractures: A systematic review and meta-analysis. <i>International Journal of Oral and Maxillofacial Surgery</i> . 2014;43(6):708-16.          |
| SR | 235 | Domínguez VB, Ramos N, García D, Bustamante M, Torrents A, Varea S, et al. Clinical trials during pregnancy: What has been done. A systematic review. <i>Basic and Clinical Pharmacology and Toxicology</i> . 2011;109:71.                                                                              |
| SR | 236 | Punukollu M, Mushet N, Linney M, Hennessy C, Morton M. Neuropsychiatric manifestations of Sydenham's chorea: A systematic review. <i>Developmental Medicine and Child Neurology</i> . 2015.                                                                                                             |
| SR | 237 | Dourdin N, Wagner M, Melnyk P, Rindress D. Systematic review to assess the quality of published health economic evaluations. <i>Journal of Population Therapeutics and Clinical Pharmacology</i> . 2011;18(2):e210.                                                                                     |
| SR | 238 | Hills C, Boshoff K, Jewell K. Preferred teaching and learning approaches of students considered 'Generation Y' in health professions pre registration education: A comprehensive systematic review protocol. <i>JB I Database of Systematic Reviews and Implementation Reports</i> . 2013;11(5):140-56. |
| SR | 239 | Klonoff EA. Introduction to the special section on discrimination. <i>Health Psychology: Official Journal Of The Division Of Health Psychology, American Psychological Association</i> . 2014;33(1):1-2.                                                                                                |
| SR | 240 | Al Shemeili S, Klein S, Strath A, Stewart D. Identifying inappropriate anticholinergic prescribing in the elderly: A systematic review. <i>International Journal of Clinical Pharmacy</i> . 2013;35(6):1343.                                                                                            |
| SR | 241 | Oliveira MAd, Ribeiro H, Castillo-Salgado C. Geospatial analysis applied to epidemiological studies of dengue: a systematic review. <i>Revista Brasileira De Epidemiologia = Brazilian Journal Of Epidemiology</i> . 2013;16(4):907-17.                                                                 |
| SR | 242 | Miller AC, Elamin EM, Suffredini AF. Inhaled anticoagulation regimens for the treatment of smoke inhalation-associated acute lung injury: A systematic review. <i>Critical Care Medicine</i> . 2014;42(2):413-9.                                                                                        |
| SR | 243 | Belvederi Murri M, Pariante CM, Dazzan P, Hepgul N, Papadopoulos AS, Zunszain P, et al. Hypothalamic-pituitary-adrenal axis and clinical symptoms in first-episode psychosis. <i>Psychoneuroendocrinology</i> . 2012;37(5):629-44.                                                                      |
| SR | 244 | Zeni MB. Systematic review of health literacy in Cochrane database studies on paediatric asthma educational interventions: Searching beyond rigorous design. <i>International Journal of Evidence-Based Healthcare</i> . 2012;10(1):3-8.                                                                |
| SR | 245 | Fleuren MAH, Paulussen TGWM, Van Dommelen P, Van Buuren S. Towards a measurement instrument for determinants of innovations. <i>International Journal For Quality In Health Care: Journal Of The International Society For Quality In Health Care / Isqua</i> . 2014;26(5):501-10.                      |
| SR | 246 | Yampolsky C, Hem S, Bendersky D. Dorsal column stimulator applications. <i>Surgical Neurology International</i> . 2012;3(SUPPL4):S275-S89.                                                                                                                                                              |
| SR | 247 | Polisena J, Chen S, Cimon K, McGill S, Forward K, Gardam M. Clinical effectiveness of rapid tests for methicillin resistant <i>Staphylococcus aureus</i> (MRSA) in hospitalized patients: A systematic review. <i>BMC Infectious Diseases</i> . 2011:336.                                               |
| SR | 248 | Hu Z, Yin X, Liao J, Zhou C, Yang Z, Zou S. The effect of teeth extraction for orthodontic treatment on the upper airway: a systematic review. <i>Sleep and Breathing</i> . 2015.                                                                                                                       |
| SR | 249 | Cleynen I, Vazeille E, Artieda M, Verspaget HW, Szczypiorska M, Bringer M-A, et al. Genetic and microbial factors modulating the ubiquitin proteasome system in inflammatory bowel disease. <i>Gut</i> . 2014;63(8):1265-74.                                                                            |
| SR | 250 | Gupta A, Chazen JL, Hartman M, Delgado D, Anumula N, Shao H, et al. Cerebrovascular reserve and stroke risk in patients with carotid stenosis or occlusion: A systematic review and meta-analysis. <i>Stroke</i> . 2012;43(11):2884-91.                                                                 |
| SR | 251 | Armstrong R, White S, Streak J, Tivey D. The effect of nasal introduction of anaesthetic in adults undergoing fiberoptic endoscopic evaluation of swallowing (FEES): A systematic review protocol. <i>JB I Database of Systematic Reviews and Implementation Reports</i> . 2013;11(6):259-74.           |
| SR | 252 | Gao Q, Tsoi KKF, Hirai HW, Wong MCS, Chan FKL, Wu JCY, et al. Serrated polyps and the risk of synchronous colorectal advanced neoplasia: A systematic review and meta-analysis. <i>American Journal of Gastroenterology</i> . 2015;110(4):501-9.                                                        |
| SR | 253 | Sproat R, Radford P, Hunt A. Hemostatic glues in tonsillectomy: A systematic review. <i>Laryngoscope</i> . 2015.                                                                                                                                                                                        |
| SR | 254 | Bourke L, Rosario DJ, Steed L, Taylor SJC. Response to comment on 'Interventions to improve exercise behaviour in sedentary people living with and beyond cancer: A systematic review'. <i>British Journal of Cancer</i> . 2014;111(12):2378-9.                                                         |
| SR | 255 | Rodrigo GJ, Plaza V. Efficacy and safety of a fixed-dose combination of indacaterol and glycopyrronium for the treatment of COPD: A systematic review. <i>Chest</i> . 2014;146(2):309-17.                                                                                                               |
| SR | 256 | Mooney J, Ranasinghe I, Chow C, Barzi F, Zoungas S, Tan T, et al. Pre-operative kidney function as a predictor of adverse outcomes after surgery- A systematic review and meta-analysis. <i>Heart Lung and Circulation</i> . 2011;20:S212.                                                              |

|    |     |                                                                                                                                                                                                                                                                                                                 |
|----|-----|-----------------------------------------------------------------------------------------------------------------------------------------------------------------------------------------------------------------------------------------------------------------------------------------------------------------|
| SR | 257 | Ben Hadj Yahia M-B, Jouin-Bortolotti A, Dervaux B. Extending the Human Papillomavirus Vaccination Programme to Include Males in High-Income Countries: A Systematic Review of the Cost-Effectiveness Studies. <i>Clinical Drug Investigation</i> . 2015;35(8):471-85.                                           |
| SR | 258 | Singh AD, Turell ME, Topham AK. Uveal melanoma: Trends in incidence, treatment, and survival. <i>Ophthalmology</i> . 2011;118(9):1881-5.                                                                                                                                                                        |
| SR | 259 | Gornall BF, Myles PS, Smith CL, Burke JA, Leslie K, Pereira MJ, et al. Measurement of quality of recovery using the QoR-40: A quantitative systematic review. <i>British Journal of Anaesthesia</i> . 2013;111(2):161-9.                                                                                        |
| SR | 260 | Luijten M, Machielsen MWJ, Veltman DJ, Hester R, de Haan L, Franken IHA. Systematic review of ERP and fMRI studies investigating inhibitory control and error processing in people with substance dependence and behavioural addictions. <i>Journal of Psychiatry and Neuroscience</i> . 2014;39(3):149-69.     |
| SR | 261 | Wu CC, Bai CH, Huang MT, Wu CH, Tam KW. Local anesthetic infusion pump for pain management following open inguinal hernia repair: A meta-analysis. <i>International Journal of Surgery</i> . 2014;12(3):245-50.                                                                                                 |
| SR | 262 | Tsukamoto K, Machida K. Effects of psychological stress on neutrophil phagocytosis and bactericidal activity in humans a meta-analysis. <i>International Journal of Psychophysiology</i> . 2014;91(2):67-72.                                                                                                    |
| SR | 263 | Clark K, Currow DC. Assessing constipation in palliative care within a gastroenterology framework. <i>Palliative Medicine</i> . 2012;26(6):834-41.                                                                                                                                                              |
| SR | 264 | Boers M. Using literature to solve clinical problems. <i>Annals of the Rheumatic Diseases</i> . 2013;72.                                                                                                                                                                                                        |
| SR | 265 | De-Almeida CP, Wenzel A, de-Carvalho CS, Powell VB, Araújo-Neto C, Quarantini LC, et al. Amygdalar volume in borderline personality disorder with and without comorbid post-traumatic stress disorder: A meta-analysis. <i>CNS Spectrums</i> . 2012;17(2):70-5.                                                 |
| SR | 266 | Boerner KE, Birnie KA, Chambers CT, Taddio A, McMurtry CM, Noel M, et al. Simple Psychological Interventions for Reducing Pain From Common Needle Procedures in Adults: Systematic Review of Randomized and Quasi-Randomized Controlled Trials. <i>The Clinical Journal Of Pain</i> . 2015;31(10 Suppl):S90-S8. |
| SR | 267 | Jeon KC, Chen LS, Goodson P. Decision to abort after a prenatal diagnosis of sex chromosome abnormality: A systematic review of the literature. <i>Genetics in Medicine</i> . 2011.                                                                                                                             |
| SR | 268 | Muth A, Ragnarsson O, Johannsson G, Wängberg B. Systematic review of surgery and outcomes in patients with primary aldosteronism. <i>The British journal of surgery</i> . 2015;102(4):307-17.                                                                                                                   |
| SR | 269 | Pan X-F, Griffiths UK, Pennington M, Yu H, Jit M. Systematic review of economic evaluations of vaccination programs in mainland China: Are they sufficient to inform decision making? <i>Vaccine</i> . 2015.                                                                                                    |
| SR | 270 | Zeng X, Dong P, Xie X. Disease burden of rheumatoid arthritis in mainland China: A systematic review and meta-analysis. <i>Value in Health</i> . 2012;15(7):A672.                                                                                                                                               |
| SR | 271 | Sharma V, Deo SV, Altarabsheh SE, Cho YH, Erwin PJ, Park SJ. Comparison of the early haemodynamics of stented pericardial and porcine aortic valves. <i>European Journal Of Cardio-Thoracic Surgery: Official Journal Of The European Association For Cardio-Thoracic Surgery</i> . 2015;47(1):4-10.            |
| SR | 272 | Liu Y, Lv DL, Duan JJ, Xu SL, Zhang JF, Yang XJ, et al. ALDH1A1 expression correlates with clinicopathologic features and poor prognosis of breast cancer patients: A systematic review and meta-analysis. <i>BMC Cancer</i> . 2014;14(1).                                                                      |
| SR | 273 | Capolongo S, Buffoli M, Oppio A, Petronio MG. [Sustainability and hygiene of building: future perspectives]. <i>Epidemiologia E Prevenzione</i> . 2014;38(6 Suppl 2):46-50.                                                                                                                                     |
| SR | 274 | Ahsan SF, Wang Y. In response to "systematic review and meta-analysis of Meniett therapy for Meniere's disease". <i>Laryngoscope</i> . 2015.                                                                                                                                                                    |
| SR | 275 | Moraes LC, Só MVR, Dal Pizzol TdS, Ferreira MBC, Montagner F. Distribution of genes related to antimicrobial resistance in different oral environments: a systematic review. <i>Journal Of Endodontics</i> . 2015;41(4):434-41.                                                                                 |
| SR | 276 | McMahon JM, Volpe EM, Klostermann K, Trabold N, Xue Y. A systematic review of the psychometric properties of the Sexual Relationship Power Scale in HIV/AIDS research. <i>Archives Of Sexual Behavior</i> . 2015;44(2):267-94.                                                                                  |
| SR | 277 | Bennabi D, Aouizerate B, El-Hage W, Doumy O, Moliere F, Courtet P, et al. Risk factors for treatment resistance in unipolar depression: a systematic review. <i>Journal Of Affective Disorders</i> . 2015;171:137-41.                                                                                           |
| SR | 278 | Joshi A, Trout K. The role of health information kiosks in diverse settings: a systematic review. <i>Health Information And Libraries Journal</i> . 2014;31(4):254-73.                                                                                                                                          |
| SR | 279 | i JY, Zhang YF, Smith GS, Xue CJ, Luo YN, Chen WH, et al. Quality of reporting of randomized clinical trials in tai chi interventions-A systematic review. <i>Evidence-based Complementary and Alternative Medicine</i> . 2011;2011.                                                                            |
| SR | 280 | Wood TJ, Quinn KM, Farrokhyar F, Deheshi B, Corbett T, Ghert MA. Local control of extra-abdominal desmoid tumors: Systematic review and meta-analysis. <i>Rare Tumors</i> . 2013;5(1):5-10.                                                                                                                     |
| SR | 281 | Mounesan L, Sepidarkish M, Hosseini H, Ahmadi A, Ardalan G, Kelishadi R, et al. Policy brief on promoting physical activity among adolescents. <i>International Journal of Preventive Medicine</i> . 2012;3(9):599-606.                                                                                         |
| SR | 282 | Dulon M, Peters C, Schablon A, Nienhaus A. MRSA carriage among healthcare workers in non-outbreak settings in Europe and the United States: A systematic review. <i>BMC Infectious Diseases</i> . 2014;14(1).                                                                                                   |



|    |     |                                                                                                                                                                                                                                                                                                                                                                   |
|----|-----|-------------------------------------------------------------------------------------------------------------------------------------------------------------------------------------------------------------------------------------------------------------------------------------------------------------------------------------------------------------------|
| SR | 283 | Xie ZB, Ma L, Wang XB, Bai T, Ye JZ, Zhong JH, et al. Transarterial embolization with or without chemotherapy for advanced hepatocellular carcinoma: a systematic review. <i>Tumor Biology</i> . 2014;35(9):8451-9.                                                                                                                                               |
| SR | 284 | Zhou H-X, Lu L, Chu T, Wang T, Cao D, Li F, et al. Skeletal cryptococcosis from 1977 to 2013. <i>Frontiers In Microbiology</i> . 2015;5:740-.                                                                                                                                                                                                                     |
| SR | 285 | Creemers H, Grupstra H, Nollet F, van den Berg LH, Beelen A. Prognostic factors for the course of functional status of patients with ALS: a systematic review. <i>Journal of Neurology</i> . 2015;262(6):1407-23.                                                                                                                                                 |
| SR | 286 | Malchow B, Hasan A, Fusar-Poli P, Schmitt A, Falkai P, Wobrock T. Cannabis abuse and brain morphology in schizophrenia: A review of the available evidence. <i>European Archives of Psychiatry and Clinical Neuroscience</i> . 2013;263(1):3-13.                                                                                                                  |
| SR | 287 | Rahimtoola SH, Huang G. Treatment of obstructive thrombosed prosthetic heart valve. <i>Cardiology (Switzerland)</i> . 2015;131:98.                                                                                                                                                                                                                                |
| SR | 288 | Wolz I, Fagundo AB, Treasure J, Fernández-Aranda F. The processing of food stimuli in abnormal eating: A systematic review of electrophysiology. <i>European Eating Disorders Review</i> . 2015;23(4):251-61.                                                                                                                                                     |
| SR | 289 | Schinasi L, Leon ME. Non-hodgkin lymphoma and occupational exposure to agricultural pesticide chemical groups and active ingredients: A systematic review and meta-analysis. <i>International Journal of Environmental Research and Public Health</i> . 2014;11(4):4449-527.                                                                                      |
| SR | 290 | Baker L, Beres AL, Baird R. A systematic review and meta-analysis of gastrostomy insertion techniques in children. <i>Journal of Pediatric Surgery</i> . 2015;50(5):718-25.                                                                                                                                                                                       |
| SR | 291 | Abdallah FW, Halpern SH, Aoyama K, Brull R. Will the real benefits of single-shot interscalene block please stand up? A systematic review and meta-analysis. <i>Anesthesia and Analgesia</i> . 2015;120(5):1114-29.                                                                                                                                               |
| SR | 292 | Bryden A, Roberts B, Petticrew M, McKee M. A systematic review of the influence of community level social factors on alcohol use. <i>Health and Place</i> . 2013;21:70-85.                                                                                                                                                                                        |
| SR | 293 | Zwiers R, Wiegerinck JI, Murawski CD, Smyth NA, Kennedy JG, Van Dijk CN. Surgical treatment for posterior ankle impingement. <i>Arthroscopy - Journal of Arthroscopic and Related Surgery</i> . 2013;29(7):1263-70.                                                                                                                                               |
| SR | 294 | Van Der Meer FJ, Velthorst E, Meijer CJ, Machielsen MW, Fusar-Poli P, De Haan L. Cannabis use in patients at clinical high risk of psychosis: Impact on prodromal symptoms and transition to psychosis-a systematic review. <i>Schizophrenia Research</i> . 2012;136:S347.                                                                                        |
| SR | 295 | Zhang R, Xu Y, Yang S, Liang H, Zhang Y, Liu Y. OnabotulinumtoxinA for neurogenic detrusor overactivity and dose differences: a systematic review. <i>International braz j urol : official journal of the Brazilian Society of Urology</i> . 2015;41(2):207-19.                                                                                                   |
| RR | 296 | Kiezebrink K, Coyle J, Hoddinott P, Witham M, Clarke A, Avenell A. Ways to intervene and support engagement of older adults weight loss study (wise owls) c mixed methods project developing an intervention. <i>Annals of Nutrition and Metabolism</i> . 2013;63:721-2.                                                                                          |
| RR | 297 | Chaiyachati KH, Ogbuoji O, Price M, Suthar AB, Negussie EK, Bärnighausen T. Interventions to improve adherence to antiretroviral therapy: a rapid systematic review. <i>AIDS (London, England)</i> . 2014;28 Suppl 2:S187-S204.                                                                                                                                   |
| RR | 298 | Franek J. Challenges of developing rapid guidance for complex interventions. <i>BMJ Quality and Safety</i> . 2013;22:A33.                                                                                                                                                                                                                                         |
| RR | 299 | Dennis SM, Harris M, Lloyd J, Powell Davies G, Faruqi N, Zwar N. Do people with existing chronic conditions benefit from telephone coaching? A rapid review. <i>Australian Health Review: A Publication Of The Australian Hospital Association</i> . 2013;37(3):381-8.                                                                                            |
| RR | 300 | Hildon Z, Neuburger J, Allwood D, van der Meulen J, Black N. Clinicians' and patients' views of metrics of change derived from patient reported outcome measures (PROMs) for comparing providers' performance of surgery. <i>BMC health services research</i> . 2012;12:171.                                                                                      |
| RR | 301 | Elliott IA, Beech AR. A U.K. Cost-Benefit Analysis of Circles of Support and Accountability Interventions. <i>Sexual Abuse: Journal of Research and Treatment</i> . 2013;25(3):211-29.                                                                                                                                                                            |
| RR | 302 | Jarrett N, Scott I, Addington-Hall J, Amir Z, Brearley S, Hodges L, et al. Informing future research priorities into the psychological and social problems faced by cancer survivors: a rapid review and synthesis of the literature. <i>European Journal Of Oncology Nursing: The Official Journal Of European Oncology Nursing Society</i> . 2013;17(5):510-20. |
| RR | 303 | Varker T, Forbes D, Dell L, Weston A, Merlin T, Hodson S, et al. Rapid evidence assessment: increasing the transparency of an emerging methodology. <i>Journal Of Evaluation In Clinical Practice</i> . 2015.                                                                                                                                                     |
| RR | 304 | Khangura S, Konnyu K, Cushman R, Grimshaw J, Moher D. Evidence summaries: The evolution of a rapid review approach. <i>Systematic Reviews</i> . 2012;1(1).                                                                                                                                                                                                        |
| RR | 305 | Jain S, Boyd C, Fiorentino L, Khorsan R, Crawford C. Are there efficacious treatments for treating the fatigue-sleep disturbance-depression symptom cluster in breast cancer patients? A Rapid Evidence Assessment of the Literature (REAL®). <i>Breast Cancer: Targets and Therapy</i> . 2015;7:267-91.                                                          |
| RR | 306 | Feys F, Devroey D. Dapoxetine for premature ejaculation: A rapid evidence assessment. <i>Journal of Sexual Medicine</i> . 2015;12:24.                                                                                                                                                                                                                             |
| RR | 307 | Sutton A, Grant MJ. Cost-effective ways of delivering enquiry services: a rapid review. <i>Health Information And Libraries Journal</i> . 2011;28(4):249-55.                                                                                                                                                                                                      |
| RR | 308 | Jain S, Fiorentino L, Lee C, Crawford C, Khorsan R, Jonas W. A rapid evidence assessment (real®) of the literature: Are there efficacious treatments for treating the                                                                                                                                                                                             |

|    |     |                                                                                                                                                                                                                                                                                                                                                       |
|----|-----|-------------------------------------------------------------------------------------------------------------------------------------------------------------------------------------------------------------------------------------------------------------------------------------------------------------------------------------------------------|
|    |     | fatigue-sleep disturbance-depression symptom cluster in breast cancer patients? <i>Psycho-Oncology</i> . 2013;22:75-6.                                                                                                                                                                                                                                |
| RR | 309 | Manayi A, Saeidnia S. A concern on phthalate pollution of herbal extracts/medicines and detection methods. <i>Research Journal of Pharmacognosy</i> . 2014;2(3):49-54.                                                                                                                                                                                |
| RR | 310 | Boycott N, Schneider J, McMurran M. Additional interventions to enhance the effectiveness of individual placement and support: a rapid evidence assessment. <i>Rehabilitation Research And Practice</i> . 2012;2012:382420-.                                                                                                                          |
| RR | 311 | Tavares SBN, Alves de Sousa NL, Manrique EJC, Pinheiro de Albuquerque ZB, Zeferino LC, Amaral RG. Improvement in the routine screening of cervical smears: A study using rapid prescreening and 100% rapid review as internal quality control methods. <i>Cancer Cytopathology</i> . 2011;119(6):367-76.                                              |
| RR | 312 | Khorsan R, Crawford C, Ives JA, Walter AR, Jonas WB. The effect of omega-3 fatty acids on biomarkers of inflammation: a rapid evidence assessment of the literature. <i>Military Medicine</i> . 2014;179(11 Suppl):2-60.                                                                                                                              |
| RR | 313 | Thomas B, Potter J, Sacks G, Webster J. Evaluation of national food reformulation initiatives: A proposed evaluation tool. <i>Global Heart</i> . 2014;9(1):e309.                                                                                                                                                                                      |
| RR | 314 | Lee C, Crawford C, Wallerstedt D, York A, Duncan A, Smith J, et al. The effectiveness of acupuncture research across components of the trauma spectrum response (tsr): A systematic review of reviews. <i>Systematic Reviews</i> . 2012;1(1).                                                                                                         |
| RR | 315 | McDaid D, Park A. Investing in integrative medicine for mental health and wellbeing: Making the economic case. <i>BMC Complementary and Alternative Medicine</i> . 2012;12.                                                                                                                                                                           |
| RR | 316 | Kim S, Wang B, Lee J, Kim B, La H, Park YM, et al. Statistical analysis system of spontaneous adverse drug reaction reports. <i>Journal of Korean Society for Clinical Pharmacology and Therapeutics</i> . 2012;20(2):155-64.                                                                                                                         |
| RR | 317 | Shin JJ, Rosenfeld RM, Schwartz SR, Mitchell RB, Weinberger DG. Rapid review: The guidelines in pediatric otolaryngology. <i>Otolaryngology - Head and Neck Surgery (United States)</i> . 2012;147:P30.                                                                                                                                               |
| RR | 318 | van den Broek EMJM, van der Zaag-Loonen HJ, Brintjes TD. Systematic Review: Efficacy of Gufoni Maneuver for Treatment of Lateral Canal Benign Paroxysmal Positional Vertigo with Geotropic Nystagmus. <i>Otolaryngology--Head And Neck Surgery: Official Journal Of American Academy Of Otolaryngology-Head And Neck Surgery</i> . 2014;150(6):933-8. |
| RR | 319 | Reynolds P. Gap analysis of animal hemorrhagic shock models through rapid evidence assessment strategies. <i>Shock</i> . 2015;43(6):42.                                                                                                                                                                                                               |
| RR | 320 | Macaulay R. What the english could learn from the Irish: Making the nice approval process more cost-effective. <i>Value in Health</i> . 2014;17(7):A440.                                                                                                                                                                                              |
| RR | 321 | Sadler M, Murphy M. Do standardized referral forms improve the quality of general practitioner referral letters to pigmented lesion clinics? A pilot study. <i>British Journal of Dermatology</i> . 2012;167(6):e29.                                                                                                                                  |
| RR | 322 | Lui M, Jones CA, Westby MD. Effect of non-surgical, non-pharmacological weight loss interventions in patients who are obese prior to hip and knee arthroplasty surgery: a rapid review. <i>Systematic Reviews</i> . 2015;4:121-.                                                                                                                      |
| RR | 323 | Wiffen PJ, Derry S, Moore RA. Impact of morphine, fentanyl, oxycodone or codeine on patient consciousness, appetite and thirst when used to treat cancer pain. <i>The Cochrane Database Of Systematic Reviews</i> . 2014;5:CD011056.                                                                                                                  |
| RR | 324 | Moran R, Davidson P. An uneven spread: a review of public involvement in the National Institute of Health Research's Health Technology Assessment program. <i>International Journal Of Technology Assessment In Health Care</i> . 2011;27(4):343-7.                                                                                                   |
| RR | 325 | Ryu S, James J, Gerszten P, Yin F, Timmerman R, Hitchcock Y, et al. RTOG 0631 Phase II/III study of image-guided stereotactic radiosurgery for localized spine metastases: Phase II results. <i>International Journal of Radiation Oncology Biology Physics</i> . 2011;81(2):S131-S2.                                                                 |
| RR | 326 | Marks L, Weatherly H, Mason A. Prioritizing investment in public health and health equity: what can commissioners do? <i>Public Health</i> . 2013;127(5):410-8.                                                                                                                                                                                       |
| RR | 327 | Koster M, Garrity C, Gallagher C, Schunemann H, Norris S. The role of rapid systematic reviews for development of rapid guidance in health care and health policy settings. <i>BMJ Quality and Safety</i> . 2013;22:A6.                                                                                                                               |
| RR | 328 | Halladay CW, Trikalinos TA, Schmid IT, Schmid CH, Dahabreh IJ. Using data sources beyond PubMed has a modest impact on the results of systematic reviews of therapeutic interventions. <i>Journal of Clinical Epidemiology</i> . 2015;68(9):1076-84.                                                                                                  |
| RR | 329 | Klee EW, Winter E, Ferber MJ. Bioinformatics decision support for interpretation of clinical NGS variants. <i>Journal of Molecular Diagnostics</i> . 2013;15(6):940-1.                                                                                                                                                                                |
| RR | 330 | Kirkland SW, Bullard M, Couperthwaite S, Rowe BH. Establishing a standardized process of gathering evidence-based information to support clinical knowledge development. <i>Canadian Journal of Emergency Medicine</i> . 2014;16:S95.                                                                                                                 |
| RR | 331 | Ryu S, Pugh SL, Gerszten PC, Yin F-F, Timmerman RD, Hitchcock YJ, et al. RTOG 0631 phase 2/3 study of image guided stereotactic radiosurgery for localized (1-3) spine metastases: phase 2 results. <i>Practical Radiation Oncology</i> . 2014;4(2):76-81.                                                                                            |
| RR | 332 | Yang ZX, Shen JT, Li YP, Zhao K, Shi CH, Xiao Y, et al. Helical tomotherapy for cancer treatment: a rapid health technology assessment. <i>Journal Of Evidence-Based Medicine</i> . 2014;7(3):192-218.                                                                                                                                                |
| RR | 333 | de Bruin RJM, Hage R, van der Zaag-Loonen H, van Benthem PPG. Rapid review: sinonasal surgery vs. medical therapy for asthma in patients with chronic rhinosinusitis with or without nasal polyps. <i>European Archives Of Oto-Rhino-Laryngology: Official Journal Of The European Federation Of Oto-Rhino-Laryngological Societies (EUFOS)</i> :     |

|    |     |                                                                                                                                                                                                                                                                                                                                           |
|----|-----|-------------------------------------------------------------------------------------------------------------------------------------------------------------------------------------------------------------------------------------------------------------------------------------------------------------------------------------------|
|    |     | Affiliated With The German Society For Oto-Rhino-Laryngology - Head And Neck Surgery. 2015.                                                                                                                                                                                                                                               |
| RR | 334 | Neville-Webbe HL, Carser JE, Wong H, Andrews J, Poulter T, Smith R, et al. The impact of a new acute oncology service in acute hospitals: Experience from the Clatterbridge Cancer Centre and Merseyside and Cheshire Cancer Network. <i>Clinical Medicine, Journal of the Royal College of Physicians of London.</i> 2013;13(6):565-659. |
| RR | 335 | Lombardi G, Zustovich F, Farina P, Polo V, Farina M, Puppa AD, et al. Cilengitide in bevacizumab-refractory high-grade glioma: two case reports and critical review of the literature. <i>Anti-Cancer Drugs.</i> 2012;23(7):749-53.                                                                                                       |
| RR | 336 | Petrosino A, Campie P, Pace J, Fronius T, Guckenburg S, Wiatrowski M, et al. Cross-sector, multi-agency interventions to address urban youth firearms violence: A Rapid Evidence Assessment. <i>Aggression and Violent Behavior.</i> 2015;22:87-96.                                                                                       |
| RR | 337 | Freitas MG, Souza KM, Silva MT, Elias FTS. Bariatric surgery from the perspective of brazilian national health system (sus). <i>Value in Health.</i> 2012;15(7):A402-A3.                                                                                                                                                                  |
| RR | 338 | Coleman P, Turner J. Patient priorities and decision-making about using 999 EMS? A review of the literature. <i>Emergency Medicine Journal.</i> 2011;28(11):e2.                                                                                                                                                                           |
| RR | 339 | Davidson G, Kelly B, Macdonald G, Rizzo M, Lombard L, Abogunrin O, et al. Supported decision making: a review of the international literature. <i>International Journal Of Law And Psychiatry.</i> 2015;38:61-7.                                                                                                                          |
| RR | 340 | Hartling L, Guise J-M, Kato E, Anderson J, Aronson N, Belinson S, et al. EPC Methods: An Exploration of Methods and Context for the Production of Rapid Reviews. 2015.                                                                                                                                                                    |
| RR | 341 | Talaulikar VS, Arulkumaran S. Medico-legal issues with CTG interpretation. <i>Current Women's Health Reviews.</i> 2013;9(3):145-57.                                                                                                                                                                                                       |
| RR | 342 | Yadav R, Shah AK, Loeb JA, Swamy MNS, Agarwal R. Morphology-based automatic seizure detector for intracerebral EEG recordings. <i>IEEE Transactions on Biomedical Engineering.</i> 2012;59(7):1871-81.                                                                                                                                    |
| RR | 343 | Crawford C, Lee C, Freilich D, Buckenmaier CC, Crawford P, Delgado R, et al. Effectiveness of active self-care complementary and integrative medicine therapies: Options for the management of chronic pain symptoms. <i>Pain Medicine (United States).</i> 2014;15(S1):S86-S95.                                                          |
| RR | 344 | Toomey E, Currie-Murphy L, Matthews J, Hurley DA. Implementation fidelity of physiotherapist-delivered group education and exercise interventions to promote self-management in people with osteoarthritis and chronic low back pain: a rapid review part II. <i>Manual Therapy.</i> 2015;20(2):287-94.                                   |
| RR | 345 | Treanor CJ, Donnelly M. The late effects of cancer and cancer treatment: a rapid review. <i>The Journal Of Community And Supportive Oncology.</i> 2014;12(4):137-48.                                                                                                                                                                      |
| RR | 346 | Miani C, Ball S, Pitchforth E, Exley J, King S, Roland M, et al. Organisational interventions to reduce length of stay in hospital: a rapid evidence assessment. 2014.                                                                                                                                                                    |
| RR | 347 | Kilpatrick C, Murdoch H, Paterson A. The rapid delivery of national evidence based recommendations for HAI care bundles. <i>Antimicrobial Resistance and Infection Control.</i> 2013;2.                                                                                                                                                   |
| RR | 348 | Attipoe S, Zeno SA, Lee C, Crawford C, Khorsan R, Walter AR, et al. Tyrosine for Mitigating Stress and Enhancing Performance in Healthy Adult Humans, a Rapid Evidence Assessment of the Literature. <i>Military Medicine.</i> 2015;180(7):754-65.                                                                                        |
| RR | 349 | Lee C, Crawford C, Buckenmaier C, Schoomaker E, Delgado R, York A. Active, self-care complementary and integrative medicine therapies for the management of chronic pain symptoms: A rapid evidence assessment of the literature. <i>Journal of Alternative and Complementary Medicine.</i> 2014;20(5):A137-A8.                           |
| RR | 350 | Nancarrow SA, Roots A, Grace S, Saberi V. Models of care involving district hospitals: a rapid review to inform the Australian rural and remote context. <i>Australian Health Review: A Publication Of The Australian Hospital Association.</i> 2015.                                                                                     |
| RR | 351 | Bungay H, Vella-Burrows T. The effects of participating in creative activities on the health and well-being of children and young people: a rapid review of the literature. <i>Perspectives In Public Health.</i> 2013;133(1):44-52.                                                                                                      |
| RR | 352 | Polisena J, Garritty C, Kamel C, Stevens A, Abou-Setta AM. Rapid review programs to support health care and policy decision making: a descriptive analysis of processes and methods. <i>Systematic Reviews.</i> 2015;4:26-.                                                                                                               |
| RR | 353 | Fitzpatrick-Lewis D, Ganann R, Krishnaratne S, Ciliska D, Kouyoumdjian F, Hwang SW. Effectiveness of interventions to improve the health and housing status of homeless people: a rapid systematic review. <i>BMC public health.</i> 2011;11:638.                                                                                         |
| RR | 354 | Belshaw Z, Asher L, Harvey ND, Dean RS. Quality of life assessment in domestic dogs: An evidence-based rapid review. <i>Veterinary Journal.</i> 2015.                                                                                                                                                                                     |
| RR | 355 | Tricco AC, Zarin W, Antony J, Hutton B, Moher D, Sherfali D, et al. An international survey and modified Delphi approach revealed numerous rapid review methods. <i>Journal Of Clinical Epidemiology.</i> 2015.                                                                                                                           |
| RR | 356 | Mobiniazadeh M, Oliyaeemanesh A, Doaee S, Nejati M, Aboee P, Azadbakht M, et al. Health technology assessment of infliximab: A rapid review of type 2 studies. <i>Journal of Isfahan Medical School.</i> 2012;30(178).                                                                                                                    |
| RR | 357 | York A, Crawford C, Walter A, Walter JAG, Jonas WB, Coeytaux R. Acupuncture research in military and veteran populations: A rapid evidence assessment of the literature. <i>Medical Acupuncture.</i> 2011;23(4):229-36.                                                                                                                   |
| RR | 358 | Cai J-Q, Chen K, Mou Y-P, Pan Y, Xu X-W, Zhou Y-C, et al. Laparoscopic versus open wedge resection for gastrointestinal stromal tumors of the stomach: a single-center 8-year retrospective cohort study of 156 patients with long-term follow-up. <i>BMC Surgery.</i> 2015;15:58-.                                                       |

|    |     |                                                                                                                                                                                                                                                                                                                                             |
|----|-----|---------------------------------------------------------------------------------------------------------------------------------------------------------------------------------------------------------------------------------------------------------------------------------------------------------------------------------------------|
| RR | 359 | Visnansky M, Mesaros S. Patient self-testing of oral anticoagulation therapy by coaguchek® xs system. Rapid health technology assessment in Slovak health care environment. <i>Value in Health</i> . 2011;14(7):A257-A8.                                                                                                                    |
| RR | 360 | Turner RM, Bird SM, Higgins JPT. The impact of study size on meta-analyses: examination of underpowered studies in Cochrane reviews. <i>Plos One</i> . 2013;8(3):e59202-e.                                                                                                                                                                  |
| RR | 361 | Hersi M, Stevens A, Quach P, Hamel C, Thavorn K, Garritty C, et al. Effectiveness of Personal Protective Equipment for Healthcare Workers Caring for Patients with Filovirus Disease: A Rapid Review. <i>Plos One</i> . 2015;10(10):e0140290-e.                                                                                             |
| RR | 362 | Doaee S, Mobinizadeh M, Oliyaeemanesh A. Rapid health technology assessment in rehabilitation hospital: Review article. <i>Journal of Isfahan Medical School</i> . 2013;31(237).                                                                                                                                                            |
| RR | 363 | Chao ST, Meier T, Godley A, Hugebeck B, Kolar M, Barrett P, et al. One-year experience with the workflow enhancement (we) team: Does continuous improvement have to be continuous? <i>International Journal of Radiation Oncology Biology Physics</i> . 2014;90(1):S744.                                                                    |
| RR | 364 | Kelly BJ, Perkins DA, Fuller JD, Parker SM. Shared care in mental illness: A rapid review to inform implementation. <i>International Journal Of Mental Health Systems</i> . 2011;5:31-.                                                                                                                                                     |
| RR | 365 | Lee C, Crawford C, Teo L, Spevak C. An analysis of the various chronic pain conditions captured in a systematic review of active self-care complementary and integrative medicine therapies for the management of chronic pain symptoms. <i>Pain Medicine (Malden, Mass)</i> . 2014;15 Suppl 1:S96-S103.                                    |
| RR | 366 | Hayden JA, Killian L, Zygmunt A, Babineau J, Martin-Misener R, Jensen JL, et al. Methods of a multi-faceted rapid knowledge synthesis project to inform the implementation of a new health service model: Collaborative Emergency Centres. <i>Systematic Reviews</i> . 2015;4(1).                                                           |
| RR | 367 | Toomey E, Currie-Murphy L, Matthews J, Hurley DA. The effectiveness of physiotherapist-delivered group education and exercise interventions to promote self-management for people with osteoarthritis and chronic low back pain: a rapid review part I. <i>Manual Therapy</i> . 2015;20(2):265-86.                                          |
| RR | 368 | Tse Y, Charters H. Rapid response to safety incidences in a children's hospital-reconstructing a system fit for the Francis report era. <i>Archives of Disease in Childhood</i> . 2014;99:A201.                                                                                                                                             |
| RR | 369 | McMurrin M. Individual-level interventions for alcohol-related violence: A rapid evidence assessment. <i>Criminal Behaviour and Mental Health</i> . 2011.                                                                                                                                                                                   |
| RR | 370 | Twycross A, Parker R, Williams A, Gibson F. Cancer-Related Pain and Pain Management: Sources, Prevalence, and the Experiences of Children and Parents. <i>Journal Of Pediatric Oncology Nursing: Official Journal Of The Association Of Pediatric Oncology Nurses</i> . 2015;32(6):369-84.                                                  |
| RR | 371 | Vujanic G, Sandstedt B, Leuschner I, Sznajder B. Central pathology review in multicentre tumour trials-do we really need it? <i>Pediatric Blood and Cancer</i> . 2011;57(5):742.                                                                                                                                                            |
| RR | 372 | Mahon S, Redmond S, Carney P. Transparency of the medicines reimbursement system in Ireland: A quantitative analysis of the influences on reimbursement decisions [2006-2013]. <i>Value in Health</i> . 2013;16(7):A459.                                                                                                                    |
| RR | 373 | Treatments for Constipation: A Review of Systematic Reviews. Canadian Agency for Drugs and Technologies in Health Rapid Response Reports. 2014.                                                                                                                                                                                             |
| RR | 374 | Featherstone RM, Dryden DM, Foisy M, Guise J-M, Mitchell MD, Paynter RA, et al. Advancing knowledge of rapid reviews: an analysis of results, conclusions and recommendations from published review articles examining rapid reviews. <i>Systematic Reviews</i> . 2015;4:50-.                                                               |
| RR | 375 | Geng Y, Fowler CS, Fulton S. Clinical librarian support for rapid review of clinical utility of cancer molecular biomarkers. <i>Medical Reference Services Quarterly</i> . 2015;34(2):202-14.                                                                                                                                               |
| RR | 376 | Beani JC. Solar protection products: Efficacy and risks. <i>Annales de Dermatologie et de Venereologie</i> . 2012;139(4):261-72.                                                                                                                                                                                                            |
| RR | 377 | Moeller-Saxone K, Davis E, Herrman H. Promoting mental health in Asia-Pacific: Systematic review focusing on Thailand and China. <i>Asia-Pacific Psychiatry: Official Journal Of The Pacific Rim College Of Psychiatrists</i> . 2015;7(4):355-65.                                                                                           |
| RR | 378 | Ju H, Hewson K. Health technology assessment and evidence-based policy making: Queensland Department of Health experience. <i>International Journal Of Technology Assessment In Health Care</i> . 2014;30(6):595-600.                                                                                                                       |
| RR | 379 | Manrique EJC, Souza NLA, Tavares SBN, Albuquerque ZBP, Zeferino LC, Amaral RG. Analysis of the performance of 100% rapid review using an average time of 1 and 2 minutes according to the quality of cervical cytology specimens. <i>Cytopathology: Official Journal Of The British Society For Clinical Cytology</i> . 2011;22(3):195-201. |
| RR | 380 | Bragge P, Piccenna L, Middleton JW, Williams S, Creasey G, Dunlop S, et al. Developing a spinal cord injury research strategy using a structured process of evidence review and stakeholder dialogue. Part I: rapid review of SCI prioritisation literature. <i>Spinal Cord</i> . 2015;53(10):714-20.                                       |
| RR | 381 | Lee C, Crawford C, Hickey A. Mind-body therapies for the self-management of chronic pain symptoms. <i>Pain Medicine (Malden, Mass)</i> . 2014;15 Suppl 1:S21-S39.                                                                                                                                                                           |
| RR | 382 | Luckett T, Phillips J, Agar M, Virdun C, Green A, Davidson PM. Elements of effective palliative care models: a rapid review. <i>BMC Health Services Research</i> . 2014;14:136-.                                                                                                                                                            |
| RR | 383 | Van De Velde S, De Buck E, Dieltjens T, Aertgeerts B. Medicinal use of potato-derived products: Conclusions of a rapid versus full systematic review. <i>Phytotherapy Research</i> . 2011;25(5):787-8.                                                                                                                                      |



|    |     |                                                                                                                                                                                                                                                                                                                                                                  |
|----|-----|------------------------------------------------------------------------------------------------------------------------------------------------------------------------------------------------------------------------------------------------------------------------------------------------------------------------------------------------------------------|
| RR | 384 | Szmuda T, Sloniewski P, Waszak PM, Springer J, Szmuda M. Towards a new treatment paradigm for ruptured blood blister-like aneurysms of the internal carotid artery? A rapid systematic review. <i>Journal Of Neurointerventional Surgery</i> . 2015.                                                                                                             |
| RR | 385 | Heard T, Chandra A, Culora G, Gupta SS, Herbert A, Morgan M. Use of the ThinPrep Imaging System for internal quality control of cervical cytology. <i>Cytopathology: Official Journal Of The British Society For Clinical Cytology</i> . 2013;24(4):246-53.                                                                                                      |
| RR | 386 | Qi Q, Fang G, Chen YX, Liu Y, Zhou CL, Wang J, et al. Mass vaccination campaign of hepatitis a vaccine and measles-mumps-rubella live attenuated vaccine in children in stricken regions of 4.20 lushan earthquake in Sichuan Province. <i>Chinese Journal of Evidence-Based Medicine</i> . 2014;14(5):501-4.                                                    |
| RR | 387 | Migliore A, Jefferson T, Cerbo M, Abraha I, Montedori A. Implantable devices for the closure of patent foramen ovale in adults: an Italian rapid health technology assessment. <i>Expert Review Of Medical Devices</i> . 2014;11(2):151-61.                                                                                                                      |
| RR | 388 | Polisena J, Garritty C, Umscheid CA, Kamel C, Samra K, Smith J, et al. Rapid Review Summit: an overview and initiation of a research agenda. <i>Systematic Reviews</i> . 2015;4:111-.                                                                                                                                                                            |
| RR | 389 | Lavery B, Orton S, Baker H, Ross J, Walsh R, Stevens R, et al. Transforming follow-up: Patients as true partners in a major multi-disciplinary change project. <i>European Journal of Cancer</i> . 2013;49:S438.                                                                                                                                                 |
| RR | 390 | Venugopal S, Blundell J, Raja Sri A, Bennett G. Current management of iron deficiency in pregnancy at a district general hospital. <i>British Journal of Haematology</i> . 2013;161:74.                                                                                                                                                                          |
| RR | 391 | Mattivi JT, Buchberger B. [Rapid Reviews: Sisyphos' Salvation? - An Inventory]. <i>Gesundheitswesen (Bundesverband Der Arzte Des Offentlichen Gesundheitsdienstes (Germany))</i> . 2015.                                                                                                                                                                         |
| RR | 392 | Wolfenden L, Carruthers J, Wyse R, Yoong S. Translation of tobacco control programs in schools: findings from a rapid review of systematic reviews of implementation and dissemination interventions. <i>Health Promotion Journal Of Australia: Official Journal Of Australian Association Of Health Promotion Professionals</i> . 2014;25(2):136-8.             |
| RR | 393 | Van der Scheer-Horst ES, van Benthem PPG, Bruinijes TD, van Leeuwen RB, van der Zaag-Loonen HJ. The efficacy of vestibular rehabilitation in patients with benign paroxysmal positional vertigo: a rapid review. <i>Otolaryngology--Head And Neck Surgery: Official Journal Of American Academy Of Otolaryngology-Head And Neck Surgery</i> . 2014;151(5):740-5. |
| RR | 394 | Antidepressants in Elderly Patients with Major and Minor Depression: A Review of Clinical Effectiveness and Guidelines. <i>Canadian Agency for Drugs and Technologies in Health Rapid Response Reports</i> . 2015.                                                                                                                                               |
| RR | 395 | Yadav R, Shah AK, Loeb JA, Swamy MN, Agarwal R. A novel unsupervised spike sorting algorithm for intracranial EEG. <i>Conference proceedings : Annual International Conference of the IEEE Engineering in Medicine and Biology Society IEEE Engineering in Medicine and Biology Society Conference</i> . 2011;2011:7545-8.                                       |
| RR | 396 | Tricco AC, Antony J, Zarin W, Striffler L, Ghassemi M, Ivory J, et al. A scoping review of rapid review methods. <i>BMC Medicine</i> . 2015;13(1).                                                                                                                                                                                                               |
| RR | 397 | Golfam M, Beall R, Brehaut J, Saeed S, Relton C, Ashbury FD, et al. Comparing alternative design options for chronic disease prevention interventions. <i>European Journal Of Clinical Investigation</i> . 2015;45(1):87-99.                                                                                                                                     |
| RR | 398 | Van der Veen EL, van Hulst RA, de Ru JA. Hyperbaric Oxygen Therapy in Acute Acoustic Trauma: A Rapid Systematic Review. <i>Otolaryngology--Head And Neck Surgery: Official Journal Of American Academy Of Otolaryngology-Head And Neck Surgery</i> . 2014;151(1):42-5.                                                                                           |
| RR | 399 | Vogus A, Graff K. PEPFAR Transitions to Country Ownership: Review of Past Donor Transitions and Application of Lessons Learned to the Eastern Caribbean. <i>Global Health, Science And Practice</i> . 2015;3(2):274-86.                                                                                                                                          |
| RR | 400 | Liew Y, De Berker D, Sansom J. Rapid clinical review of patients assessed by a teledermatology service: Analysis of pathways and outcomes. <i>British Journal of Dermatology</i> . 2014;171:138.                                                                                                                                                                 |
| RR | 401 | Hwang EH, Hwang M, Shin BC, Lee GS. Effect of Tai Chi as therapeutic exercise on blood pressure: Rapid systematic review. <i>Journal of Alternative and Complementary Medicine</i> . 2014;20(5):A57.                                                                                                                                                             |
| RR | 402 | Banbury A, Roots A, Nancarrow S. Rapid review of applications of e-health and remote monitoring for rural residents. <i>The Australian Journal Of Rural Health</i> . 2014;22(5):211-22.                                                                                                                                                                          |
| RR | 403 | Souza KM, Goncalves L. HTA studies on orphan drugs by rebratsxmembers. <i>Value in Health</i> . 2014;17(7):A540.                                                                                                                                                                                                                                                 |
| RR | 404 | Briand C, Menear M. Implementing a continuum of evidence-based psychosocial interventions for people with severe mental illness: Part 2 - Review of critical implementation issues. <i>Canadian Journal of Psychiatry</i> . 2014;59(4):187-95.                                                                                                                   |
| RR | 405 | Exploring the method and process of rapid review. <i>Chinese Journal of Evidence-Based Medicine</i> . 2014;14(5):497-500.                                                                                                                                                                                                                                        |
| RR | 406 | Parker S, Fuller J. Are nurses well placed as care co-ordinators in primary care and what is needed to develop their role: a rapid review? <i>Health &amp; Social Care In The Community</i> . 2015.                                                                                                                                                              |
| RR | 407 | Ball K, Carver A, Downing K, Jackson M, O'Rourke K. Addressing the social determinants of inequities in physical activity and sedentary behaviours. <i>Health Promotion International</i> . 2015;30 Suppl 2:ii8-ii19.                                                                                                                                            |

|        |     |                                                                                                                                                                                                                                                                                                                                     |
|--------|-----|-------------------------------------------------------------------------------------------------------------------------------------------------------------------------------------------------------------------------------------------------------------------------------------------------------------------------------------|
| RR     | 408 | Bavolek RA, Aubin CD, Kim AJ. Team-based learning: Electrocardiogram interpretation and application for emergency medicine residents. <i>Academic Emergency Medicine</i> . 2013;20(5):S346.                                                                                                                                         |
| RR     | 409 | Li A, Giaddui T, Chen W, Cui Y, McNulty S, Freedman G, et al. An analysis of rapid review cases that failed to meet the RTOG 1005 contouring and dose-volume criteria. <i>International Journal of Radiation Oncology Biology Physics</i> . 2013;87(2):S228.                                                                        |
| RR     | 410 | Neville FG, Goodall CA, Williams DJ, Donnelly PD. Violence brief interventions: A rapid review. <i>Aggression and Violent Behavior</i> . 2014;19(6):692-8.                                                                                                                                                                          |
| RR     | 411 | Wegner I, Niesten MEF, van Werkhoven CH, Grolman W. Rapid Systematic Review of the Epley Maneuver versus Vestibular Rehabilitation for Benign Paroxysmal Positional Vertigo. <i>Otolaryngology--Head And Neck Surgery: Official Journal Of American Academy Of Otolaryngology-Head And Neck Surgery</i> . 2014;151(2):201-7.        |
| RR     | 412 | Oh J, Calabresi PA. Emerging injectable therapies for multiple sclerosis. <i>The Lancet Neurology</i> . 2013;12(11):1115-26.                                                                                                                                                                                                        |
| RR     | 413 | Phillips J. Palliative care systems: Evidence for key models of care elements. <i>Asia-Pacific Journal of Clinical Oncology</i> . 2013;9:95.                                                                                                                                                                                        |
| RR     | 414 | Hinchliffe A. Minor ailments schemes: A rapid review of the evidence. <i>International Journal of Pharmacy Practice</i> . 2012;20:39-40.                                                                                                                                                                                            |
| RR     | 415 | Loveday HP, Wilson JA, Kerr K, Pitchers R, Walker JT, Browne J. Association between healthcare water systems and <i>Pseudomonas aeruginosa</i> infections: a rapid systematic review. <i>The Journal Of Hospital Infection</i> . 2014;86(1):7-15.                                                                                   |
| RR     | 416 | Do Nascimento Tavares SB, De Souza NLA, Manrique EJC, Azara CZS, Da Silveira EA, Amaral RG. Internal quality control for cervical cytopathology: Comparison of potential false-negatives detected at rapid prescreening and at 100% rapid review. <i>Acta Cytologica</i> . 2014;58(5):439-45.                                       |
| RR     | 417 | Konnyu KJ, Kwok E, Skidmore B, Moher D. The effectiveness and safety of emergency department short stay units: a rapid review. <i>Open Medicine: A Peer-Reviewed, Independent, Open-Access Journal</i> . 2012;6(1):e10-e6.                                                                                                          |
| RR     | 418 | Gabapentin for Adults with Neuropathic Pain: A Review of the Clinical Evidence and Guidelines. Canadian Agency for Drugs and Technologies in Health Rapid Response Reports. 2014.                                                                                                                                                   |
| RR     | 419 | Harker J, Kleijnen J. What is a rapid review? A methodological exploration of rapid reviews in Health Technology Assessments. <i>International Journal Of Evidence-Based Healthcare</i> . 2012;10(4):397-410.                                                                                                                       |
| RR     | 420 | McCullough AL, Haycock JC, Forward DP, Moran CG. Early management of the severely injured major trauma patient. <i>British Journal Of Anaesthesia</i> . 2014;113(2):234-41.                                                                                                                                                         |
| RR     | 421 | Munn Z, Lockwood C, Moola S. The Development and Use of Evidence Summaries for Point of Care Information Systems: A Streamlined Rapid Review Approach. <i>Worldviews On Evidence-Based Nursing / Sigma Theta Tau International, Honor Society Of Nursing</i> . 2015;12(3):131-8.                                                    |
| RR     | 422 | Fiscella K, Tobin JN, Carroll JK, He H, Ogedegbe G. Ethical oversight in quality improvement and quality improvement research: new approaches to promote a learning health care system. <i>BMC Medical Ethics</i> . 2015;16(1):63-.                                                                                                 |
| RR     | 423 | Davis C, Tomas J. Care of the dying: how do we replace the Liverpool Care Pathway? <i>British Medical Bulletin</i> . 2014;112(1):5-15.                                                                                                                                                                                              |
| RR     | 424 | Blank L, Coster J, O' Cathain A, Knowles E, Tosh J, Turner J, et al. The appropriateness of, and compliance with, telephone triage decisions: a systematic review and narrative synthesis. <i>Journal Of Advanced Nursing</i> . 2012;68(12):2610-21.                                                                                |
| RR     | 425 | Oh HC, Ng WH. Rapid health technology assessment-intrathecal baclofen pump therapy for intractable spasticity. <i>Proceedings of Singapore Healthcare</i> . 2011;20:66.                                                                                                                                                             |
| RR     | 426 | Drennan VM, Halter M, Brearley S, Carneiro W, Gabe J, Gage H, et al. Investigating the contribution of physician assistants to primary care in England: a mixed-methods study. 2014.                                                                                                                                                |
| RR     | 427 | Dangott B, Salama M. Automated image analysis and scoring of tartrate resistance acid phosphatase preparations. <i>Laboratory Investigation</i> . 2012;92:331A.                                                                                                                                                                     |
| RR     | 428 | Hinrichs S, Jahagirdar D, Miani C, Guerin B, Nolte E. Learning for the NHS on procurement and supply chain management: a rapid evidence assessment. <i>NIHR Journals Library</i> . 2014.                                                                                                                                            |
| RR     | 429 | Brearley SG, Stamatakis Z, Addington-Hall J, Foster C, Hodges L, Jarrett N, et al. The physical and practical problems experienced by cancer survivors: a rapid review and synthesis of the literature. <i>European Journal Of Oncology Nursing: The Official Journal Of European Oncology Nursing Society</i> . 2011;15(3):204-12. |
| RR     | 430 | Moyad MA. Heart health = urologic health and heart unhealthy = urologic unhealthy: Rapid review of lifestyle changes and dietary supplements. <i>Urologic Clinics of North America</i> . 2011;38(3):359-67.                                                                                                                         |
| CRD RR | 431 | Pre-emptive oral non-steroidal anti-inflammatory drugs or acetaminophen for knee arthroscopy: a rapid review (Structured abstract). <i>Health Technology Assessment Database [Internet]</i> . 2014; (3).                                                                                                                            |
| CRD RR | 432 | Pron G. Coronary revascularization in ischemic heart failure patients: a rapid review (Structured abstract). <i>Health Technology Assessment Database [Internet]</i> . 2013; (3).                                                                                                                                                   |
| CRD RR | 433 | Schaink A, Lambrinos A. Vasodilators for in-hospital heart failure management: a rapid review (update) (Structured abstract). <i>Health Technology Assessment Database [Internet]</i> . 2015; (3).                                                                                                                                  |
| CRD RR | 434 | Brener S. Local infiltration analgesia in hip and knee arthroplasty: a rapid review (Structured abstract). <i>Health Technology Assessment Database [Internet]</i> . 2013; (3).                                                                                                                                                     |

|        |     |                                                                                                                                                                                                                                                                                                |
|--------|-----|------------------------------------------------------------------------------------------------------------------------------------------------------------------------------------------------------------------------------------------------------------------------------------------------|
| CRD RR | 435 | Bracing after knee arthroscopy: a rapid review (Structured abstract). Health Technology Assessment Database [Internet]. 2014; (3).                                                                                                                                                             |
| CRD RR | 436 | Preoperative shower or bath with antiseptics before knee arthroscopy: a rapid review (Structured abstract). Health Technology Assessment Database [Internet]. 2014; (3).                                                                                                                       |
| CRD RR | 437 | Pron G. Early mobilization and ambulation in hospitalized heart failure patients: a rapid review (Structured abstract). Health Technology Assessment Database [Internet]. 2013; (3).                                                                                                           |
| CRD RR | 438 | Intra-articular analgesia after knee arthroscopy: a rapid review (Structured abstract). Health Technology Assessment Database [Internet]. 2014; (3).                                                                                                                                           |
| CRD RR | 439 | Costello RB, Lentino CV, Boyd CC, O'Connell ML, Crawford CC, Sprengel ML, et al. The effectiveness of melatonin for promoting healthy sleep: a rapid evidence assessment of the literature (Provisional abstract). Database of Abstracts of Reviews of Effects [Internet]. 2014; (2):[106 p.]. |
| CRD RR | 440 | Monotherapy versus combination therapy for adults hospitalized for community-acquired pneumonia: a rapid review (Structured abstract). Health Technology Assessment Database [Internet]. 2013; (3).                                                                                            |
| CRD RR | 441 | Cost-effectiveness of urgent care for transient ischemic attack: an economic rapid review (Structured abstract). Health Technology Assessment Database [Internet]. 2015; (3).                                                                                                                  |
| CRD RR | 442 | Birmingham SL. Pulmonary rehabilitation setting for adults with chronic obstructive pulmonary disease (COPD): an economic rapid review (Structured abstract). Health Technology Assessment Database [Internet]. 2015; (3).                                                                     |
| CRD RR | 443 | McMartin K. Preoperative cardiac stress tests for noncardiac surgery: a rapid review (Structured abstract). Health Technology Assessment Database [Internet]. 2014; (3).                                                                                                                       |
| CRD RR | 444 | Hemoglobin A1c testing in diabetes: a rapid review (Structured abstract). Health Technology Assessment Database [Internet]. 2014; (3).                                                                                                                                                         |
| CRD RR | 445 | Migliore A, Jefferson T, Cerbo M, Abraha I, Montedori A. Implantable devices for the closure of patent foramen ovale in adults: an Italian rapid health technology assessment (Provisional abstract). Database of Abstracts of Reviews of Effects [Internet]. 2014; (2):[151-61 pp.].          |
| CRD RR | 446 | Schlink A. Optimized timing of thrombolytic therapy for the treatment of stroke: a rapid review (Structured abstract). Health Technology Assessment Database [Internet]. 2013; (3).                                                                                                            |
| CRD RR | 447 | Luckett T, Phillips J, Agar M, Virdun C, Green A, Davidson PM. Elements of effective palliative care models: a rapid review (Provisional abstract). BMC Health Services Research [Internet]. 2014; 14(1):[136 p.].                                                                             |
| CRD RR | 448 | Dorresteyn PM, Ipenburg NA, Murphy KJ, Smit M, Vulpen JK, Wegner I, et al. Rapid systematic review of normal audiometry results as a predictor for benign paroxysmal positional vertigo (Provisional abstract). Otolaryngology - Head and Neck Surgery [Internet]. 2014; 150(6):[919-24 pp.].  |
| CRD RR | 449 | Roberfroid D, San Miguel L, Paulus D. Non-invasive markers of subclinical atherosclerosis for predicting a primary cardiovascular event: a rapid systematic review (Structured abstract). Health Technology Assessment Database [Internet]. 2015; (3).                                         |
| CRD RR | 450 | Fergenbaum J. Harms of Prostate-Specific Antigen (PSA) screening in prostate cancer: a rapid review (Structured abstract). Health Technology Assessment Database [Internet]. 2015; (3).                                                                                                        |
| CRD RR | 451 | Total hip arthroplasty versus hemiarthroplasty for displaced femoral neck fractures: a rapid review (Structured abstract). Health Technology Assessment Database [Internet]. 2013; (3).                                                                                                        |
| CRD RR | 452 | Brener S. Anesthesia among patients undergoing knee arthroplasty: a rapid review (Structured abstract). Health Technology Assessment Database [Internet]. 2013; (3).                                                                                                                           |
| CRD RR | 453 | Nikitovic M. Antibiotic-laden bone cement for primary knee arthroplasty: a rapid review (Structured abstract). Health Technology Assessment Database [Internet]. 2013; (3).                                                                                                                    |
| CRD RR | 454 | Nikitovic M. Clinical utility of echocardiography for patients with hip fracture: a rapid review (Structured abstract). Health Technology Assessment Database [Internet]. 2013; (3).                                                                                                           |
| CRD RR | 455 | Ghazipura M. Shorter versus longer duration of antibiotic therapy in patients with community-acquired pneumonia: a rapid review (Structured abstract). Health Technology Assessment Database [Internet]. 2013; (3).                                                                            |
| CRD RR | 456 | Ghazipura M. Care coordination on postacute stroke, chronic obstructive pulmonary disease, and heart failure clients: a rapid review (Structured abstract). Health Technology Assessment Database [Internet]. 2015; (3).                                                                       |
| CRD RR | 457 | Ghazipura M. Usefulness of urinary antigen testing for Legionella in the treatment of community-acquired pneumonia: a rapid review (Structured abstract). Health Technology Assessment Database [Internet]. 2013; (3).                                                                         |
| CRD RR | 458 | Chaiyachati KH, Ogbuaji O, Price M, Suthar AB, Negussie EK, Barnighausen T. Interventions to improve adherence to antiretroviral therapy: a rapid systematic review (Provisional abstract). Database of Abstracts of Reviews of Effects [Internet]. 2014; (2):[S187-s204 pp.].                 |
| CRD RR | 459 | Brener S. Optimal timing of hip fracture surgery: a rapid review (Structured abstract). Health Technology Assessment Database [Internet]. 2013; (3).                                                                                                                                           |
| CRD RR | 460 | Scheer-Horst ES, Benthem PP, Brintjes TD, Leeuwen RB, Zaag-Loonen HJ. The efficacy of vestibular rehabilitation in patients with benign paroxysmal positional vertigo: a rapid review (Provisional abstract). Database of Abstracts of Reviews of Effects [Internet]. 2014; (2):[740-5 pp.].   |



|        |     |                                                                                                                                                                                                                                                                                                                                                           |
|--------|-----|-----------------------------------------------------------------------------------------------------------------------------------------------------------------------------------------------------------------------------------------------------------------------------------------------------------------------------------------------------------|
| CRD RR | 461 | Hinrichs S, Jahagirdar D, Miani C, Guerin B, Nolte E. Learning for the NHS on procurement and supply chain management: a rapid evidence assessment (Structured abstract). Health Technology Assessment Database [Internet]. 2014; (3).                                                                                                                    |
| CRD RR | 462 | Toomey E, Currie-Murphy L, Matthews J, Hurley DA. The effectiveness of physiotherapist-delivered group education and exercise interventions to promote self-management for people with osteoarthritis and chronic low back pain: rapid review Part I (Provisional abstract). Database of Abstracts of Reviews of Effects [Internet]. 2014; (2);[epub p.]. |
| CRD RR | 463 | Simultaneous or staged bilateral knee arthroplasty: a rapid review (Structured abstract). Health Technology Assessment Database [Internet]. 2013; (3).                                                                                                                                                                                                    |
| CRD RR | 464 | Brener S. The effectiveness of cement in primary hip replacements: a rapid review (Structured abstract). Health Technology Assessment Database [Internet]. 2013; (3).                                                                                                                                                                                     |
| CRD RR | 465 | Dennett L, Harstall C. Stingray catheter and guidewire for recanalization of coronary chronic total occlusions: A rapid evidence assessment (Structured abstract). Health Technology Assessment Database [Internet]. 2013; (3);[28 p.].                                                                                                                   |
| CRD RR | 466 | Turner J, Preston L, Booth A, O'Keeffe C, Campbell F, Jesurasa A, et al. What evidence is there for a relationship between organisational features and patient outcomes in congenital heart disease services? A rapid review (Structured abstract). Health Technology Assessment Database [Internet]. 2014; (3).                                          |
| CRD RR | 467 | Wegner I, Niesten ME, Werkhoven CH, Grolman W. Rapid systematic review of the Epley maneuver versus vestibular rehabilitation for benign paroxysmal positional vertigo (Provisional abstract). Database of Abstracts of Reviews of Effects [Internet]. 2014; (2);[201-7 pp.].                                                                             |
| CRD RR | 468 | Antibiotic coverage in atypical pathogens for adults hospitalized with community-acquired pneumonia: a rapid review (Structured abstract). Health Technology Assessment Database [Internet]. 2013; (3).                                                                                                                                                   |
| CRD RR | 469 | Brener S. Electrocardiograms for diagnosing ischemia as a precipitant to acute heart failure: a rapid review (Structured abstract). Health Technology Assessment Database [Internet]. 2013; (3).                                                                                                                                                          |
| CRD RR | 470 | Schaink A. Vasodilators for in-hospital heart failure management: a rapid review (Structured abstract). Health Technology Assessment Database [Internet]. 2013; (3).                                                                                                                                                                                      |
| CRD RR | 471 | Severity assessment tools for patients with community-acquired pneumonia: a rapid review (Structured abstract). Health Technology Assessment Database [Internet]. 2013; (3).                                                                                                                                                                              |
| CRD RR | 472 | Reinink H, Wegner I, Stegeman I, Grolman W. Rapid systematic review of repeated application of the Epley maneuver for treating posterior BPPV (Provisional abstract). Database of Abstracts of Reviews of Effects [Internet]. 2014; (2);[399-406 pp.].                                                                                                    |
| CRD RR | 473 | Effect of a 60-minute door-to-needle tissue plasminogen activator on stroke disability: a rapid review (Structured abstract). Health Technology Assessment Database [Internet]. 2015; (3).                                                                                                                                                                |
| CRD RR | 474 | Brener S. Chest X-rays for diagnosing pulmonary infection as a precipitant of acute heart failure: a rapid review (Structured abstract). Health Technology Assessment Database [Internet]. 2013; (3).                                                                                                                                                     |
| CRD RR | 475 | Predictive validity of tools used to assess the risk of unplanned admissions: A rapid review of the evidence (Structured abstract). Health Technology Assessment Database [Internet]. 2014; (3).                                                                                                                                                          |
| CRD RR | 476 | Testing vitamin B12 levels in neuropathy, alopecia, dizziness, and fatigue: a rapid review (Structured abstract). Health Technology Assessment Database [Internet]. 2014; (3).                                                                                                                                                                            |
| CRD RR | 477 | Ultrafiltration in heart failure: a rapid review (Structured abstract). Health Technology Assessment Database [Internet]. 2015; (3).                                                                                                                                                                                                                      |
| CRD RR | 478 | Optimal onset-to-admission interval for inpatient stroke rehabilitation: a rapid review (Structured abstract). Health Technology Assessment Database [Internet]. 2013; (3).                                                                                                                                                                               |
| CRD RR | 479 | Jang BH, Lee HY, Jung YJ, An JH. Efficacy of atomoxetine and methylphenidate in attention deficits hyperactivity disorder in adults: a rapid review (Structured abstract). Health Technology Assessment Database [Internet]. 2012; (3).                                                                                                                   |
| CRD RR | 480 | Bond K, Dennett L, Harstall C, Yan C, Chuck A. Total prosthetic replacement of the temporomandibular joint: a rapid evidence assessment and economic analysis (Structured abstract). Health Technology Assessment Database [Internet]. 2013; (3).                                                                                                         |
| CRD RR | 481 | Sehatazadeh S. Effectiveness of increased intensity of rehabilitation in post-stroke patients: a rapid review (Structured abstract). Health Technology Assessment Database [Internet]. 2013; (3).                                                                                                                                                         |
| CRD RR | 482 | Yang ZX, Shen JT, Li YP, Zhao K, Shi CH, Xiao Y, et al. Helical tomotherapy for cancer treatment: a rapid health technology assessment (Provisional abstract). Database of Abstracts of Reviews of Effects [Internet]. 2014; (2);[192-218 pp.].                                                                                                           |
| CRD RR | 483 | Sehatazadeh S. Transient ischemic attack: where can patients receive optimal care? A rapid review (Structured abstract). Health Technology Assessment Database [Internet]. 2013; (3).                                                                                                                                                                     |
| CRD RR | 484 | Nikitovic M. Intramedullary nails in comparison with sliding hip screws for intertrochanteric hip fractures: a rapid review (Structured abstract). Health Technology Assessment Database [Internet]. 2013; (3).                                                                                                                                           |
| CRD RR | 485 | McMartin K. B-type natriuretic peptide testing: a rapid review (Structured abstract). Health Technology Assessment Database [Internet]. 2013; (3).                                                                                                                                                                                                        |
| CRD RR | 486 | Nikitovic M. Intensity of rehabilitation during the acute hospitalization period after hip or knee arthroplasty: a rapid review (Structured abstract). Health Technology Assessment Database [Internet]. 2013; (3).                                                                                                                                       |

|               |     |                                                                                                                                                                                                                                                                                                        |
|---------------|-----|--------------------------------------------------------------------------------------------------------------------------------------------------------------------------------------------------------------------------------------------------------------------------------------------------------|
| <b>CRD RR</b> | 487 | Criteria for switching from intravenous to oral antibiotics in patients hospitalized with community-acquired pneumonia: a rapid review (Structured abstract). Health Technology Assessment Database [Internet]. 2013; (3).                                                                             |
| <b>CRD RR</b> | 488 | Duijn JG, Isfordink LM, Nij Bijvank JA, Stapper CW, Vuren AJ, Wegner I, et al. Rapid systematic review of the Epley maneuver for treating posterior canal benign paroxysmal positional vertigo (Provisional abstract). Database of Abstracts of Reviews of Effects [Internet]. 2014; (2):[925-32 pp.]. |
| <b>CRD RR</b> | 489 | Brener S. Nerve blocks for pain management in patients with hip fractures: a rapid review (Structured abstract). Health Technology Assessment Database [Internet]. 2013; (3).                                                                                                                          |

CSR: Cochrane systematic reviews; SR: non-Cochrane systematic reviews; RR: rapid reviews; CRD RR: Rapid reviews of the University of York, databases of the Center for Reviews and Dissemination

For peer review only

**Characteristics of stakeholder involvement in systematic and rapid reviews:  
a methodological review in the area of health services research**

**Jonas Feldmann, Milo A. Puhan, Margot Mutsch\***

**Supplementary Table S2:**

**Characteristics of the study population by type of included review**

|                                    | <b>Cochrane<br/>SR (%)</b> | <b>Non-Cochrane<br/>SR (%)</b> | <b>RR (%)</b>             | <b>CRD RR<br/>(%)</b> | <b>Total (%)</b>        |
|------------------------------------|----------------------------|--------------------------------|---------------------------|-----------------------|-------------------------|
| <b>Setting</b>                     |                            |                                |                           |                       |                         |
| Hospital setting,<br>inpatients    | 7 (23)                     | 1 (3)                          | 8 (27)                    | 10 (33)               | 26 (22)                 |
| Outpatients                        | 9 (30)                     | 9 (30)                         | 7 (23)                    | 4 (13)                | 29 (24)                 |
| Home setting                       | 0                          | 3 (10)                         | 0                         | 3 (10)                | 6 (5)                   |
| Community setting                  | 5 (17)                     | 10 (33)                        | 13 (43)                   | 7 (23)                | 35 (29)                 |
| Multiple                           | 9 (30)                     | 5 (17)                         | 0                         | 4 (13)                | 18 (15)                 |
| Other                              | 0                          | 2 (7)                          | 2 (7)                     | 2 (7)                 | 6 (5)                   |
| <b>Population size<sup>1</sup></b> |                            |                                |                           |                       |                         |
| Median<br>(range)                  | 733<br>(0; 390,769)        | 2,846.5<br>(36; 4,650,877)     | 2,717<br>(102; 1,700,000) | 349.5<br>(0; 372,746) | 1,622<br>(0; 4,650,877) |
| <b>Population type</b>             |                            |                                |                           |                       |                         |
| Patients with<br>disease/condition | 18 (60)                    | 18 (60)                        | 20 (67)                   | 26 (87)               | 82 (68)                 |
| Healthy population                 | 9 (30)                     | 8 (27)                         | 9 (30)                    | 3 (10)                | 29 (24)                 |
| Other                              | 3 (10)                     | 4 (13)                         | 1 (3)                     | 1 (3)                 | 9 (8)                   |
| <b>Age range (yrs)</b>             |                            |                                |                           |                       |                         |
| Adults (>18)                       | 20 (67)                    | 14 (47)                        | 13 (43)                   | 25 (83)               | 72 (60)                 |

|                     |         |         |         |          |          |
|---------------------|---------|---------|---------|----------|----------|
| Adolescents (13-18) | 2 (7)   | 1 (3)   | 1 (3)   | 1 (3)    | 5 (4)    |
| Children (0-12)     | 3 (10)  | 1 (3)   | 1 (3)   | 0        | 5 (4)    |
| Youth (0-18)        | 1 (3)   | 2 (7)   | 0       | 0        | 3 (3)    |
| Other subgroups     | 1 (3)   | 6 (20)  | 2 (7)   | 3 (10)   | 12 (10)  |
| Population          | 3 (10)  | 6 (20)  | 13 (43) | 1 (3)    | 23 (19)  |
| <b>Sex</b>          |         |         |         |          |          |
| Females and males   | 29 (97) | 28 (93) | 24 (80) | 30 (100) | 111 (93) |
| Females only        | 1 (3)   | 1 (3)   | 4 (13)  | 0        | 6 (5)    |
| Males only          | 0       | 1 (3)   | 2 (7)   | 0        | 3 (3)    |

CRD: University of York, Centre for Reviews and Dissemination; RR: rapid review; SR: systematic review; WHO: World Health Organisation

<sup>1</sup> Zero means that there were no participants mentioned or included in the review.
