# Supplementary material for: Characteristics of stakeholder involvement in systematic and rapid reviews: a methodological review in the area of health services research
Source: PubMed Central journal article supplement — BMJ Open. 2019 Aug 15;9(8):e024587. doi: 10.1136/bmjopen-2018-024587 (PMC6701675; doi:10.1136/bmjopen-2018-024587), 2019-08-15
Supplement: bmjopen-2018-024587supp003.pdf [file bmjopen-2018-024587supp003.pdf]

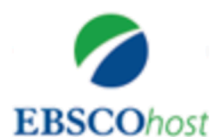

Thursday, October 22, 2015 6:29:28 AM

| #  | Query                                                                     | Limiters/Expanders                                                                                     | Last Run Via                                                                                            | Results |
|----|---------------------------------------------------------------------------|--------------------------------------------------------------------------------------------------------|---------------------------------------------------------------------------------------------------------|---------|
| S2 | AB "systematic review"<br>OR TI "systematic<br>review" NOT AB<br>cochrane | Limiters - Date of<br>Publication: 20110101-<br>20151231<br>Search modes - Find all<br>my search terms | Interface - EBSCOhost<br>Research Databases<br>Search Screen - Advanced<br>Search<br>Database - MEDLINE | 38,740  |
| S1 | AB "systematic review"<br>OR TI "systematic<br>review"                    | Limiters - Date of<br>Publication: 20110101-<br>20151231<br>Search modes - Find all<br>my search terms | Interface - EBSCOhost<br>Research Databases<br>Search Screen - Advanced<br>Search<br>Database - MEDLINE | 42,718  |
