# Supplementary material for: Characteristics of stakeholder involvement in systematic and rapid reviews: a methodological review in the area of health services research
Source: PubMed Central journal article supplement — BMJ Open. 2019 Aug 15;9(8):e024587. doi: 10.1136/bmjopen-2018-024587 (PMC6701675; doi:10.1136/bmjopen-2018-024587), 2019-08-15
Supplement: bmjopen-2018-024587supp004.pdf [file bmjopen-2018-024587supp004.pdf]

## Embase Session Results

| No. | Query                                                                                                                                                                                                                                                                                                                                     | Results |
|-----|-------------------------------------------------------------------------------------------------------------------------------------------------------------------------------------------------------------------------------------------------------------------------------------------------------------------------------------------|---------|
| #13 | 'rapid systematic review' OR 'rapid review' OR 'rapid evidence assessment' OR 'rapid health technology assessment' OR 'rapid assessment':ab,ti AND [2011-2015]/py                                                                                                                                                                         | 1,343   |
| #12 | 'rapid systematic review' OR 'rapid review' OR 'rapid evidence assessment' OR 'rapid health technology assessment':ab,ti AND [2011-2015]/py                                                                                                                                                                                               | 188     |
| #11 | 'rapid systematic review' OR 'rapid review' OR 'rapid evidence assessment' OR 'rapid health technology assessment' OR 'brief review':ab,ti AND [2011-2015]/py                                                                                                                                                                             | 3,710   |
| #10 | 'rapid systematic review' OR 'rapid review' OR 'rapid evidence assessment' OR 'rapid evidence' OR 'rapid health technology assessment' OR 'evidence brief' OR 'evidence summary' OR 'brief review':ab,ti AND [2011-2015]/py                                                                                                               | 3,801   |
| #9  | 'rapid assessment' OR 'rapid systematic review' OR 'rapid review' OR 'rapid evidence assessment' OR 'rapid evidence' OR 'rapid health technology assessment' OR 'evidence brief' OR 'evidence summary' OR 'brief review':ab,ti AND [2011-2015]/py                                                                                         | 4,977   |
| #8  | 'rapid assessment' OR 'rapid systematic review' OR 'rapid review' OR 'rapid evidence assessment' OR 'rapid evidence' OR 'rapid synthesis' OR 'rapid health technology assessment' OR 'evidence brief' OR 'evidence summary' OR 'brief review':ab,ti AND [2011-2015]/py                                                                    | 5,372   |
| #7  | 'rapid assessment' OR 'rapid systematic review' OR 'rapid review' OR 'rapid evidence assessment' OR 'rapid method' OR 'rapid evidence' OR 'rapid synthesis' OR 'rapid health technology assessment' OR 'evidence brief' OR 'evidence summary' OR 'brief review':ab,ti AND [2011-2015]/py                                                  | 7,285   |
| #6  | rapid AND (assessment OR 'systematic review'/exp OR 'systematic review' OR 'evidence assessment' OR 'health technology assessment' OR 'method'/exp OR method OR 'review'/exp OR review OR evidence OR 'synthesis'/exp OR synthesis) OR 'brief review' OR 'evidence brief' OR 'evidence summary':ab,ti AND [embase]/lim AND [2011-2015]/py | 143,957 |

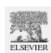

© 2015 Reed Elsevier Properties SA. All rights reserved.

Embase is a registered trademark of Reed Elsevier Properties SA, used under license.
