# Supplementary material for: Characteristics of stakeholder involvement in systematic and rapid reviews: a methodological review in the area of health services research
Source: PubMed Central journal article supplement — BMJ Open. 2019 Aug 15;9(8):e024587. doi: 10.1136/bmjopen-2018-024587 (PMC6701675; doi:10.1136/bmjopen-2018-024587), 2019-08-15
Supplement: bmjopen-2018-024587supp005.pdf [file bmjopen-2018-024587supp005.pdf]

Tabelle1

### Characteristics of stakeholder involvement in systematic and rapid reviews: Data extraction: AMSTAR ratings

| Type<br>(SR, RR, ID<br>CRD<br>RR)  | Study<br>ID | Year of<br>study | Citation                                                                                                                                                                                                                                                               | AMSTAR assessment  |                                 |                                                                                                                                            |                                                                                                                                               |
|------------------------------------|-------------|------------------|------------------------------------------------------------------------------------------------------------------------------------------------------------------------------------------------------------------------------------------------------------------------|--------------------|---------------------------------|--------------------------------------------------------------------------------------------------------------------------------------------|-----------------------------------------------------------------------------------------------------------------------------------------------|
|                                    |             |                  |                                                                                                                                                                                                                                                                        | Review<br>protocol | A priori<br>design<br>provided? | Was there duplicate<br>study selection and<br>data extraction? (at<br>least two independent<br>data extractors and<br>consensus procedure) | Comprehensive<br>literature search<br>performed? (at least<br>two electronic sources,<br>reports must include<br>years and databases<br>used) |
| <b>Cochrane systematic reviews</b> |             |                  |                                                                                                                                                                                                                                                                        |                    |                                 |                                                                                                                                            |                                                                                                                                               |
| CSR                                | 101         | 2012             | Olsen O, Clausen JA. Planned hospital birth versus planned home birth. <i>Cochrane Database of Systematic Reviews</i> 2012, Issue 9. Art. No.: CD000352. DOI: 10.1002/14651858.CD000352.pub2.                                                                          | yes                | 1                               | 1                                                                                                                                          | 1                                                                                                                                             |
| CSR                                | 102         | 2013             | Moi JHY, Sriranganathan MK, Edwards CJ, Buchbinder R. Lifestyle interventions for acute gout. <i>Cochrane Database of Systematic Reviews</i> 2013, Issue 11. Art. No.: CD010519. DOI: 10.1002/14651858.CD010519.pub2.                                                  | yes                | 1                               | 1                                                                                                                                          | 1                                                                                                                                             |
| CSR                                | 103         | 2011             | Thomas RE, Lorenzetti D, Spragins W. Mentoring adolescents to prevent drug and alcohol use. <i>Cochrane Database of Systematic Reviews</i> 2011, Issue 11. Art. No.: CD007381. DOI: 10.1002/14651858.CD007381.pub2.                                                    | yes                | 1                               | 1                                                                                                                                          | 1                                                                                                                                             |
| CSR                                | 104         | 2012             | Garrison SR, Allan GM, Sekhon RK, Musini VM, Khan KM. Magnesium for skeletal muscle cramps. <i>Cochrane Database of Systematic Reviews</i> 2012, Issue 9. Art. No.: CD009402. DOI: 10.1002/14651858.CD009402.pub2.                                                     | yes                | 1                               | 1                                                                                                                                          | 1                                                                                                                                             |
| CSR                                | 105         | 2012             | Tejani AM, Wasdell M, Spiwak R, Rowell G, Nathwani S. Carnitine for fatigue in multiple sclerosis. <i>Cochrane Database of Systematic Reviews</i> 2012, Issue 5. Art. No.: CD007280. DOI: 10.1002/14651858.CD007280.pub3.                                              | yes                | 1                               | 1                                                                                                                                          | 1                                                                                                                                             |
| CSR                                | 106         | 2013             | Taylor F, Huffman MD, Macedo AF, Moore THM, Burke M, Davey Smith G, Ward K, Ebrahim S. Statins for the primary prevention of cardiovascular disease. <i>Cochrane Database of Systematic Reviews</i> 2013, Issue 1. Art. No.: CD004816. DOI: 10.1002/14651858.CD004816. | yes                | 1                               | 1                                                                                                                                          | 1                                                                                                                                             |
| CSR                                | 107         | 2013             | Jorge EC, Jorge EN, El Dib RP. Early light reduction for preventing retinopathy of prematurity in very low birth weight infants. <i>Cochrane Database of Systematic Reviews</i> 2013, Issue 8. Art. No.: CD000122. DOI: 10.1002/14651858.CD000122.pub2.                | yes                | 1                               | 1                                                                                                                                          | 1                                                                                                                                             |
| CSR                                | 108         | 2012             | Jin H, Leng Q, Li C. Dietary flavonoid for preventing colorectal neoplasms. <i>Cochrane Database of Systematic Reviews</i> 2012, Issue 8. Art. No.: CD009350. DOI: 10.1002/14651858.CD009350.pub2.                                                                     | yes                | 1                               | 1                                                                                                                                          | 1                                                                                                                                             |

Tabelle1

| Status of publication used as inclusion criterion? (search for grey or unpublished literature?) | List of studies provided? (excluded studies referenced?) | Characteristics of included studies provided? | Scientific quality of included studies assessed and documented? (methods provided) | Scientific quality of included studies used appropriately in formulating conclusions? | Methods used to combine findings of studies appropriate? (mentions or describes heterogeneity?) | Likelihood of publication bias assessed? (graphical aids and/or statistical tests?) | Conflict of interest included? | Final Score | Grouping of scores (strong: ≥8=2; moderate: 4-7=1; weak) | health evidence / health systems evidence platforms |
|-------------------------------------------------------------------------------------------------|----------------------------------------------------------|-----------------------------------------------|------------------------------------------------------------------------------------|---------------------------------------------------------------------------------------|-------------------------------------------------------------------------------------------------|-------------------------------------------------------------------------------------|--------------------------------|-------------|----------------------------------------------------------|-----------------------------------------------------|
| 1                                                                                               | 1                                                        | 1                                             | 1                                                                                  | 1                                                                                     | 1                                                                                               | 1                                                                                   | 1                              | 11          | 2                                                        | 6/9                                                 |
| 1                                                                                               | 1                                                        | 1                                             | 1                                                                                  | 1                                                                                     | 1                                                                                               | 1                                                                                   | 1                              | 11          | 2                                                        | not found                                           |
| 1                                                                                               | 1                                                        | 1                                             | 1                                                                                  | 1                                                                                     | 1                                                                                               | 1                                                                                   | 1                              | 11          | 2                                                        | 9 (strong)                                          |
| 1                                                                                               | 1                                                        | 1                                             | 1                                                                                  | 1                                                                                     | 1                                                                                               | 1                                                                                   | 1                              | 11          | 2                                                        | not found                                           |
| 1                                                                                               | 1                                                        | 1                                             | 1                                                                                  | 1                                                                                     | 1 na                                                                                            | 1                                                                                   | 1                              | 10          | 2                                                        | not found                                           |
| 1                                                                                               | 1                                                        | 1                                             | 1                                                                                  | 1                                                                                     | 1                                                                                               | 1                                                                                   | 1                              | 11          | 2                                                        | not found                                           |
| 1                                                                                               | 1                                                        | 1                                             | 1                                                                                  | 1                                                                                     | 1                                                                                               | 1                                                                                   | 1                              | 11          | 2                                                        | not found                                           |
| 1                                                                                               | 1                                                        | 1                                             | 1                                                                                  | 1                                                                                     | 1                                                                                               | 1                                                                                   | 1                              | 11          | 2                                                        | not found                                           |

Tabelle1

|     |     |      |                                                                                                                                                                                                                                                                                         |     |   |   |   |
|-----|-----|------|-----------------------------------------------------------------------------------------------------------------------------------------------------------------------------------------------------------------------------------------------------------------------------------------|-----|---|---|---|
| CSR | 109 | 2014 | Karmali KN, Davies P, Taylor F, Beswick A, Martin N, Ebrahim S. Promoting patient uptake and adherence in cardiac rehabilitation. <i>Cochrane Database of Systematic Reviews</i> 2014, Issue 6. Art. No.: CD007131. DOI: 10.1002/14651858.CD007131.pub3.                                | yes | 1 | 1 | 1 |
| CSR | 110 | 2014 | Bjelakovic G, Gluud LL, Nikolova D, Whitfield K, Krstic G, Wetterslev J, Gluud C. Vitamin D supplementation for prevention of cancer in adults. <i>Cochrane Database of Systematic Reviews</i> 2014, Issue 6. Art. No.: CD007469. DOI: 10.1002/14651858.CD007469.pub2.                  | yes | 1 | 1 | 1 |
| CSR | 111 | 2014 | Carney T, Myers BJ, Louw J, Okwundu CI. Brief school-based interventions and behavioural outcomes for substance-using adolescents. <i>Cochrane Database of Systematic Reviews</i> 2014, Issue 2. Art. No.: CD008969. DOI: 10.1002/14651858.CD008969.pub2.                               | yes | 1 | 1 | 1 |
| CSR | 112 | 2013 | Taylor MJ, Rudkin L, Bullemor-Day P, Lubin J, Chukwujekwu C, Hawton K. Strategies for managing sexual dysfunction induced by antidepressant medication. <i>Cochrane Database of Systematic Reviews</i> 2013, Issue 5. Art. No.: CD003382. DOI: 10.1002/14651858.CD003382.               | yes | 1 | 1 | 1 |
| CSR | 113 | 2012 | Fonner VA, Denison J, Kennedy CE, O'Reilly K, Sweat M. Voluntary counseling and testing (VCT) for changing HIV-related risk behavior in developing countries. <i>Cochrane Database of Systematic Reviews</i> 2012, Issue 9. Art. No.: CD001224. DOI: 10.1002/14651858.                  | yes | 1 | 1 | 1 |
| CSR | 114 | 2012 | Shields L, Zhou H, Pratt J, Taylor M, Hunter J, Pascoe E. Family-centred care for hospitalised children aged 0-12 years. <i>Cochrane Database of Systematic Reviews</i> 2012, Issue 10. Art. No.: CD004811. DOI: 10.1002/14651858.CD004811.pub3.                                        | yes | 1 | 1 | 1 |
| CSR | 115 | 2014 | Nava F, Ghilotti F, Maggi L, Hatemi G, Del Bianco A, Merlo C, Filippini G, Tramacere I. Biologics, colchicine, corticosteroids, immunosuppressants and interferon-alpha for Neuro-Behçet's Syndrome. <i>Cochrane Database of Systematic Reviews</i> 2014, Issue 12. Art. No.: CD007796. | yes | 1 | 1 | 1 |
| CSR | 116 | 2013 | Njei B, Kongnyuy EJ, Kumar S, Okwen MP, Sankar MJ, Mbuagbaw L. Optimal timing for antiretroviral therapy initiation in patients with HIV infection and concurrent cryptococcal meningitis. <i>Cochrane Database of Systematic Reviews</i> 2013, Issue 2. Art. No.: CD007796.            | yes | 1 | 1 | 1 |
| CSR | 117 | 2014 | Lager KE, Mistri AK, Khunti K, Haunton VJ, Sett AK, Wilson AD. Interventions for improving modifiable risk factor control in the secondary prevention of stroke. <i>Cochrane Database of Systematic Reviews</i> 2014, Issue 5. Art. No.: CD009103. DOI: 10.1002/14651858.               | yes | 1 | 1 | 1 |
| CSR | 118 | 2013 | Chen W, Zhang Y, Li X, Yang G, Liu JP. Chinese herbal medicine for diabetic peripheral neuropathy. <i>Cochrane Database of Systematic Reviews</i> 2013, Issue 10. Art. No.: CD007796. DOI: 10.1002/14651858.CD007796.pub3.                                                              | yes | 1 | 1 | 1 |
| CSR | 119 | 2011 | Fede G, Germani G, Gluud C, Gurusamy KS, Burroughs AK. Propylthiouracil for alcoholic liver disease. <i>Cochrane Database of Systematic Reviews</i> 2011, Issue 6. Art. No.: CD002800. DOI: 10.1002/14651858.CD002800.pub3.                                                             | yes | 1 | 1 | 1 |

Tabelle1

|   |      |    |    |    |      |   |   |   |    |   |             |
|---|------|----|----|----|------|---|---|---|----|---|-------------|
| 1 | 1    | 1  | 1  | 1  | 1    | 1 | 1 | 1 | 11 | 2 | 9/10        |
| 1 | 1    | 1  | 1  | 1  | 1    | 1 | 1 | 1 | 11 | 2 | 9 (strong)  |
| 1 | 1    | 1  | 1  | 1  | 1    | 1 | 1 | 1 | 11 | 2 | 10 (strong) |
| 1 | 1    | 1  | 1  | 1  | 1    | 1 | 1 | 1 | 11 | 2 | not found   |
| 1 | 1    | 1  | 1  | 1  | 1    | 1 | 1 | 1 | 11 | 2 | 10/11       |
| 1 | 1    | 1  | 1  | 1  | 1 na |   | 1 | 1 | 10 | 2 | 9/10        |
| 1 | 1 na | na | na | na | na   |   | 1 | 1 | 7  | 1 | not found   |
| 1 | 1    | 1  | 1  | 1  | 1    | 1 | 1 | 1 | 11 | 2 | not found   |
| 1 | 1    | 1  | 1  | 1  | 1    | 1 | 1 | 1 | 11 | 2 | not found   |
| 1 | 1    | 1  | 1  | 1  | 1    | 1 | 1 | 1 | 11 | 2 | not found   |
| 1 | 1    | 1  | 1  | 1  | 1    | 1 | 1 | 1 | 11 | 2 | not found   |

Tabelle1

|     |     |      |                                                                                                                                                                                                                                                                       |     |   |   |   |
|-----|-----|------|-----------------------------------------------------------------------------------------------------------------------------------------------------------------------------------------------------------------------------------------------------------------------|-----|---|---|---|
| CSR | 120 | 2012 | Jefferson T, Rivetti A, Di Pietrantonj C, Demicheli V, Ferroni E. Vaccines for preventing influenza in healthy children. <i>Cochrane Database of Systematic Reviews</i> 2012, Issue 8. Art. No.: CD004879. DOI: 10.1002/14651858.CD004879.pub4.                       | yes | 1 | 1 | 1 |
| CSR | 121 | 2011 | Akl EA, Oxman AD, Herrin J, Vist GE, Terrenato I, Sperati F, Costiniuk C, Blank D, Schünemann H. Framing of health information messages. <i>Cochrane Database of Systematic Reviews</i> 2011, Issue 12. Art. No.: CD006777. DOI: 10.1002/14651858.CD006777.pub2.      | yes | 1 | 1 | 1 |
| CSR | 122 | 2011 | Smart NA, Marshall BJ, Daley M, Boulos E, Windus J, Baker N, Kwok N. Low-fat diets for acquired hypercholesterolaemia. <i>Cochrane Database of Systematic Reviews</i> 2011, Issue 2. Art. No.: CD007957. DOI: 10.1002/14651858.CD007957.pub2.                         | yes | 1 | 1 | 1 |
| CSR | 123 | 2011 | Cheuk DKL, Chiang AKS, Lee TL, Chan GCF, Ha SY. Vaccines for prophylaxis of viral infections in patients with hematological malignancies. <i>Cochrane Database of Systematic Reviews</i> 2011, Issue 3. Art. No.: CD006505. DOI: 10.1002/14651858.CD006505.pub2.      | yes | 1 | 1 | 1 |
| CSR | 124 | 2015 | Kwong JSW, Lau HLC, Yeung F, Chau PH. Yoga for secondary prevention of coronary heart disease. <i>Cochrane Database of Systematic Reviews</i> 2015, Issue 7. Art. No.: CD009506. DOI: 10.1002/14651858.CD009506.pub4.                                                 | yes | 1 | 1 | 1 |
| CSR | 125 | 2015 | Overdeest GM, Jacobs W, Vleggeert-Lankamp C, Thomé C, Gunzburg R, Peul W. Effectiveness of posterior decompression techniques compared with conventional laminectomy for lumbar stenosis. <i>Cochrane Database of Systematic Reviews</i> 2015, Issue 3. Art. No.: CD0 | yes | 1 | 1 | 1 |
| CSR | 126 | 2014 | Marti-Carvajal AJ, Knight-Madden JM, Martinez-Zapata MJ. Interventions for treating leg ulcers in people with sickle cell disease. <i>Cochrane Database of Systematic Reviews</i> 2014, Issue 12. Art. No.: CD008394. DOI: 10.1002/14651858.CD008394.pub3.            | yes | 1 | 1 | 1 |
| CSR | 127 | 2014 | Junker AE, Als-Nielsen B, Gluud C, Gluud LL. Dopamine agents for hepatic encephalopathy. <i>Cochrane Database of Systematic Reviews</i> 2014, Issue 2. Art. No.: CD003047. DOI: 10.1002/14651858.CD003047.pub3.                                                       | yes | 1 | 1 | 1 |
| CSR | 128 | 2013 | Peckham EJ, Nelson EA, Greenhalgh J, Cooper K, Roberts ER, Agrawal A. Homeopathy for treatment of irritable bowel syndrome. <i>Cochrane Database of Systematic Reviews</i> 2013, Issue 11. Art. No.: CD009710. DOI: 10.1002/14651858.CD009710.pub2.                   | yes | 1 | 1 | 1 |
| CSR | 129 | 2013 | Okwundu CI, Nagpal S, Musekiwa A, Sinclair D. Home- or community-based programmes for treating malaria. <i>Cochrane Database of Systematic Reviews</i> 2013, Issue 5. Art. No.: CD009527. DOI: 10.1002/14651858.CD009527.pub2.                                        | yes | 1 | 1 | 1 |
| CSR | 130 | 2013 | Rahimi-Movaghar A, Amin-Esmaili M, Hefazi M, Yousefi-Nooraie R. Pharmacological therapies for maintenance treatments of opium dependence. <i>Cochrane Database of Systematic Reviews</i> 2013, Issue 1. Art. No.: CD007775. DOI: 10.1002/14651858.CD007775.pub2.      | yes | 1 | 1 | 1 |

**Systematic reviews (non-Cochrane)**

Tabelle1

|   |      |    |    |    |   |   |   |   |    |   |                    |
|---|------|----|----|----|---|---|---|---|----|---|--------------------|
| 1 | 1    | 0  | 1  | 1  | 1 | 1 | 1 | 1 | 10 | 2 | 10 (strong)        |
| 1 | 1    | 1  | 1  | 1  | 1 | 1 | 1 | 1 | 11 | 2 | 10/11 & 9 (strong) |
| 1 | 1 na | na | na | na |   |   | 1 | 1 | 7  | 1 | not found          |
| 1 | 1    | 1  | 1  | 1  | 1 | 1 | 1 | 1 | 11 | 2 | not found          |
| 1 | 1 na | na | na | na |   |   | 1 | 1 | 7  | 1 | 9 (strong)         |
| 1 | 1    | 1  | 1  | 1  | 1 | 1 | 1 | 1 | 11 | 2 | not found          |
| 1 | 1    | 1  | 1  | 1  | 1 | 1 | 1 | 1 | 11 | 2 | not found          |
| 1 | 1    | 1  | 1  | 1  | 1 | 1 | 1 | 1 | 11 | 2 | not found          |
| 1 | 1    | 1  | 1  | 1  | 1 | 1 | 1 | 1 | 11 | 2 | not found          |
| 1 | 1    | 0  | 1  | 1  | 1 | 1 | 1 | 1 | 10 | 2 | 10/10              |
| 1 | 1    | 1  | 1  | 1  | 1 | 1 | 1 | 1 | 11 | 2 | not found          |

11

Tabelle1

|    |     |      |                                                                                                                                                                                                                                                                                                                                                                                       |                |   |   |   |
|----|-----|------|---------------------------------------------------------------------------------------------------------------------------------------------------------------------------------------------------------------------------------------------------------------------------------------------------------------------------------------------------------------------------------------|----------------|---|---|---|
| SR | 131 | 2015 | Rush CJ, Campbell RT, Jhund PS, et al. Falling cardiovascular mortality in heart failure with reduced ejection fraction and implications for clinical trials. <i>JACC Heart Fail.</i> 2015;3(8):603–14.                                                                                                                                                                               | none mentioned | 1 | 1 | 1 |
| SR | 132 | 2015 | Foersch M, Jacobs C, Wriedt S, Hechtner M, Wehrbein H. Effectiveness of maxillary protraction using facemask with or without maxillary expansion: a systematic review and meta-analysis. <i>Clinical Oral Investigations</i> [serial online]. July 2015;19(6):1181-119                                                                                                                | yes            | 1 | 1 | 1 |
| SR | 133 | 2015 | Sipe TA, Finnie RKC, Knopf JA, et al. Effects of mental health benefits legislation: A Community Guide systematic review. <i>Am J Prev Med.</i> 2015;48(6):755–766.                                                                                                                                                                                                                   | yes            | 1 | 1 | 1 |
| SR | 134 | 2013 | A.A. Ahmed, E. Alsharief, A. Alsharief, Intensive versus conventional glycemic control: what is best for patients with type 2 diabetes? <i>Diabetes Metab Syndr</i> , 7 (2013), pp. 48–51                                                                                                                                                                                             | none mentioned | 1 | 1 | 1 |
| SR | 135 | 2012 | M. Panagioti, P.A. Gooding, N. Tarrar A meta-analysis of the association between posttraumatic stress disorder and suicidality: the role of comorbid depression; <i>Compr. Psychiatry</i> , 53 (2012), pp. 915–930                                                                                                                                                                    | none mentioned | 1 | 1 | 1 |
| SR | 136 | 2015 | Z. Wang Age-dependent decline of association between obesity and mortality: a systematic review and meta-analysis <i>Obes Res Clin Pract</i> , 9 (2015), pp. 1–11                                                                                                                                                                                                                     | yes            | 1 | 1 | 1 |
| SR | 137 | 2015 | E. Rolka A systematic review of music and dyslexia, <i>The Arts in Psychotherapy</i> , 46 (2015), pp 24-32                                                                                                                                                                                                                                                                            | no             | 1 | 1 | 1 |
| SR | 138 | 2011 | Wu S, Cohen D, Shi Y, Pearson M, Sturm R. Economic analysis of physical activity interventions. <i>Am J Prev Med.</i> 2011;40(2):149–58.                                                                                                                                                                                                                                              | none mentioned | 1 | 1 | 1 |
| SR | 139 | 2012 | Rodgers M, Asaria M, Walker S, McMillan D, Lucock M, Harden M, et al. The clinical effectiveness and cost-effectiveness of low-intensity psychological interventions for the secondary prevention of relapse after depression: a systematic review. <i>Health Techn</i>                                                                                                               | yes            | 1 | 1 | 1 |
| SR | 140 | 2015 | Chien T-J, Liu C-Y, Chang Y-F, Fang C-J, Hsu C-H. Acupuncture for Treating Aromatase Inhibitor-Related Arthralgia in Breast Cancer: A Systematic Review and Meta-Analysis. <i>Journal of Alternative and Complementary Medicine.</i> 2015;21(5):251-260. doi:10.1089/acm.2014.0083.                                                                                                   | none mentioned | 1 | 1 | 1 |
| SR | 141 | 2013 | Int J Integr Care 2013; Jul-Sep; URN:NBN:NL:Ul:10-1-114740 , Community services' involvement in the discharge of older adults from hospital into the community,                                                                                                                                                                                                                       | none mentioned | 1 | 1 | 1 |
| SR | 142 | 2012 | Johantgen M, Fountain L, Zangaro G, Newhouse R, Stanik-Hutt J, White K. Comparison of labor and delivery care provided by certified nurse-midwives and physicians: a systematic review, 1990 to 2008. <i>Womens Health Issues Off Publ Jacobs Inst Womens Health.</i> 2012;22:e73–e81. doi: 10.1016/j.whi.2011.06.005.                                                                | none mentioned | 1 | 1 | 1 |
| SR | 143 | 2015 | Rozet, F., Bastide, C., Beuzeboc, P., Cormier, L., Fromont, G., Hennequin, C., Soulié, A6:1134 (2015). [Management of low-risk prostate cancer]. <i>Progrès En Urologie : Journal de l'Association Française d'urologie et de La Société Française d'urologie,</i> 25(1), 1–10. <a href="https://doi.org/10.1016/j.purol.2014.10.007">https://doi.org/10.1016/j.purol.2014.10.007</a> | none mentioned | 1 | 0 | 0 |

Tabelle1

|   |   |   |      |   |   |   |   |    |   |                   |
|---|---|---|------|---|---|---|---|----|---|-------------------|
| 0 | 0 | 1 | 0    | 0 | 1 | 0 | 0 | 5  | 1 | not found         |
| 1 | 1 | 1 | 1    | 1 | 1 | 1 | 1 | 11 | 2 | not found         |
| 1 | 1 | 0 | 1    | 1 | 0 | 0 | 0 | 7  | 1 | 5/10 & 9 (strong) |
| 1 | 0 | 1 | 1    | 1 | 0 | 0 | 1 | 8  | 2 | not found         |
| 0 | 1 | 1 | 1    | 1 | 1 | 1 | 0 | 9  | 2 | not found         |
| 1 | 1 | 1 | 1    | 1 | 1 | 0 | 1 | 10 | 2 | not found         |
| 1 | 1 | 1 | 0    | 0 | 0 | 0 | 0 | 6  | 1 | not found         |
| 0 | 1 | 0 | 0    | 0 | 0 | 0 | 0 | 4  | 1 | not found         |
| 1 | 1 | 0 | 1    | 1 | 1 | 1 | 1 | 10 | 2 | 8 (strong)        |
| 1 | 0 | 1 | 1    | 1 | 1 | 0 | 1 | 9  | 2 | not found         |
| 1 | 0 | 0 | 1    | 1 | 0 | 0 | 0 | 6  | 1 | not found         |
| 0 | 0 | 1 | 1    | 1 | 1 | 0 | 0 | 7  | 1 | not found         |
| 0 | 0 | 0 | 0 na |   | 1 | 0 | 1 | 3  | 0 | not found         |



Tabelle1

|    |     |      |                                                                                                                                                                                                                                                                                                                                                                 |                |   |   |   |
|----|-----|------|-----------------------------------------------------------------------------------------------------------------------------------------------------------------------------------------------------------------------------------------------------------------------------------------------------------------------------------------------------------------|----------------|---|---|---|
| SR | 144 | 2014 | Maglione, Margaret A.; Das, Lopamudra; Raaen, Laura; et al. Safety of Vaccines Used for Routine Immunization of US Children: A Systematic Review PEDIATRICS Volume: 134 Issue: 2 Pages: 325-337 Published: AUG 2014 DOI <a href="http://dx.doi.org/10.1542/peds">http://dx.doi.org/10.1542/peds</a> .                                                           | yes            | 1 | 1 | 1 |
| SR | 145 | 2014 | Albrecht B, Staiger PK, Hall K, et al. (2014) Benzodiazepine use and aggressive behaviour: A systematic review. Australian and New Zealand Journal of Psychiatry 48: 1096–1114. doi: 10.1177/0004867414548902                                                                                                                                                   | yes            | 1 | 1 | 1 |
| SR | 146 | 2012 | Te Morenga Lisa, Mallard Simonette, Mann Jim. Dietary sugars and body weight: systematic review and meta-analyses of randomised controlled trials and cohort studies BMJ 2013; 346 :e7492 doi: <a href="http://dx.doi.org/10.1136/bmj.e7492">http://dx.doi.org/10.1136/bmj.e7492</a>                                                                            | yes            | 1 | 1 | 1 |
| SR | 147 | 2014 | Jeannette A. C. Lankhaar, Wouter R. de Vries, Jaap A. C. G. Jansen, Pierre M. J. Zelissen & Frank J. G. Backx (2014) Impact of Overt and Subclinical Hypothyroidism on Exercise Tolerance: A Systematic Review, Research Quarterly for Exercise and Sport, 85:3, 365-389, DOI: 10.1080/02701367.2014.930405                                                     | none mentioned | 1 | 1 | 1 |
| SR | 148 | 2013 | Vanessa Siffredi , Vicki Anderson , Richard J. Leventer & Megan M. Spencer- Smith (2013) Neuropsychological Profile of Agenesis of the Corpus Callosum: A Systematic Review, Developmental Neuropsychology, 38:1, 36-57, DOI: 10.1080/87565641.2012.721421                                                                                                      | none mentioned | 1 | 1 | 1 |
| SR | 149 | 2015 | Llewellyn, A., Simmonds, M., Owen, C. G., and Woolacott, N. (2015) Childhood obesity as a predictor of morbidity in adulthood: a systematic review and meta-analysis. Obes Rev, 17: 56–67. doi: 10.1111/obr.12316.                                                                                                                                              | yes            | 1 | 0 | 1 |
| SR | 150 | 2014 | Matsuda, A., Yamaoka, K., Tango, T., Matsuda, T., Nishimoto, H. (2014). Effectiveness of psychoeducational support on quality of life in early-stage breast cancer patients: A systematic review and meta-analysis of randomized controlled trials. Qual Life R                                                                                                 | none mentioned | 1 | 1 | 1 |
| SR | 151 | 2013 | A. Bak, J. Browne, H. P. Loveday and A. Tsiami (2013). Systematic review of nutritional interventions to prevent healthcare-associated infections in undernourished elderly. Proceedings of the Nutrition Society, 72, E212 doi:10.1017/S0029665113002371.                                                                                                      | yes            | 1 | 0 | 1 |
| SR | 152 | 2014 | L. Bourke, K. E. Homer, M. A. Thaha, L. Steed, D. J. Rosario, K. A. Robb, J. M. Saxton and S. J. C. Taylor Interventions to improve exercise behaviour in sedentary people living with and beyond cancer: A systematic review British Journal of Cancer (2014)                                                                                                  | yes            | 1 | 1 | 1 |
| SR | 153 | 2013 | BRAY, James et al. Effectiveness of parent-centred interventions [etc]. JBI Library of Systematic Reviews, [S.I.], v. 8, n. 16 Suppl, p. S34 - 45, jul. 2010. ISSN 1838-2142. <a href="http://www.joannabriggslibrary.org/jbilibrary/index.php/jbisrir/article/view/571/">http://www.joannabriggslibrary.org/jbilibrary/index.php/jbisrir/article/view/571/</a> | yes            | 1 | 1 | 0 |
| SR | 154 | 2014 | Tricco AC, Antony J, Khan PA, et al. Safety and effectiveness of dipeptidyl peptidase-4 inhibitors versus intermediate-acting insulin or placebo for patients with type 2 diabetes failing two oral antihyperglycaemic agents: a systematic review and network meta-analysis. BMJ Open 2014;4:e005752. doi:10.1136/bmjopen-2014-005752                          | yes            | 1 | 1 | 1 |

Tabelle1

|   |   |   |   |   |   |   |   |   |    |   |             |
|---|---|---|---|---|---|---|---|---|----|---|-------------|
| 1 | 0 | 0 | 0 | 0 | 0 | 0 | 0 | 1 | 5  | 1 | 3 (weak)    |
| 1 | 0 | 1 | 0 | 0 | 0 | 1 | 1 | 1 | 8  | 2 | not found   |
| 1 | 0 | 1 | 0 | 0 | 0 | 1 | 1 | 1 | 8  | 2 | not found   |
| 0 | 0 | 1 | 1 | 1 | 1 | 1 | 0 | 0 | 7  | 1 | not found   |
| 0 | 0 | 1 | 0 | 0 | 0 | 0 | 0 | 0 | 4  | 1 | not found   |
| 0 | 1 | 1 | 1 | 1 | 1 | 1 | 1 | 1 | 9  | 2 | not found   |
| 0 | 0 | 1 | 1 | 1 | 1 | 1 | 0 | 0 | 7  | 1 | not found   |
| 0 | 0 | 1 | 0 | 1 | 0 | 0 | 0 | 0 | 4  | 1 | not found   |
| 1 | 1 | 1 | 1 | 1 | 1 | 1 | 1 | 0 | 10 | 2 | 10 (strong) |
| 0 | 0 | 0 | 0 | 0 | 0 | 1 | 1 | 1 | 5  | 1 | not found   |
| 0 | 1 | 1 | 1 | 1 | 1 | 1 | 1 | 1 | 10 | 2 | not found   |

Tabelle1

|    |     |      |                                                                                                                                                                                                                                                                                                             |                |   |   |   |
|----|-----|------|-------------------------------------------------------------------------------------------------------------------------------------------------------------------------------------------------------------------------------------------------------------------------------------------------------------|----------------|---|---|---|
| SR | 155 | 2012 | Agarwal R, Goldenberg M, Perry R, Ishak WW. The Quality of Life of Adults with Attention Deficit Hyperactivity Disorder: A Systematic Review. <i>Innovations in Clinical Neuroscience</i> . 2012;9(5-6):10-21.                                                                                              | no             | 1 | 0 | 1 |
| SR | 156 | 2013 | Ian C. Scott, Rachael Tan, Daniel Stahl, Sophia Steer, Cathryn M. Lewis, and Andrew P. Cope The protective effect of alcohol on developing rheumatoid arthritis: a systematic review and meta-analysis <i>Rheumatology</i> (2013) 52 (5): 856-867 first published online                                    | none mentioned | 1 | 1 | 1 |
| SR | 157 | 2014 | Hu MB, Xu H, Bai PD, et al. Obesity has multifaceted impact on biochemical recurrence of prostate cancer: a dose-response meta-analysis of 36,927 patients. <i>Med Oncol</i> 2014; 31:829. DOI: 10.1007/s12032-013-0829-8                                                                                   | none mentioned | 1 | 1 | 1 |
| SR | 158 | 2014 | Blasco, M.A., Redleaf, M.I., 2014. Cochlear implantation in unilateral sudden deafness improves tinnitus and speech comprehension: meta-analysis and systematic review. <i>Otol. Neurotol.</i> 35 (8), 1426-1432. DOI: 10.1097/MAO.0000000000000431                                                         | none mentioned | 1 | 1 | 1 |
| SR | 159 | 2014 | Vasconcellos, Fabricio; Seabra, Andre; Katzmarzyk, Peter T.; et al., Physical Activity in Overweight and Obese Adolescents: Systematic Review of the Effects on Physical Fitness Components and Cardiovascular Risk Factors <i>SPORTS MEDICINE</i> Volume: 44 Issue: 8 Pages: 1139-1152 Published: AUG 2014 | none mentioned | 1 | 1 | 1 |
| SR | 160 | 2015 | Gibbs et al., 2014, M. Gibbs, C. Winsper, S. Marwaha, E. Gilbert, M. Broome, S.P. Singh, Cannabis use and mania symptoms: a systematic review and meta-analysis <i>J. Affect. Disord.</i> , 171C (2014), pp. 39–47, doi:10.1016/j.jad.2014.09.016                                                           | yes            | 1 | 1 | 1 |

**Rapid reviews**

Tabelle1

|   |   |   |      |   |   |   |   |    |   |           |
|---|---|---|------|---|---|---|---|----|---|-----------|
| 0 | 0 | 1 | 0 na |   | 0 | 0 | 1 | 4  | 1 | not found |
| 0 | 0 | 1 | 0    | 0 | 1 | 0 | 1 | 6  | 1 | not found |
| 1 | 0 | 1 | 0    | 1 | 1 | 1 | 1 | 9  | 2 | not found |
| 1 | 1 | 1 | 0    | 0 | 0 | 0 | 1 | 7  | 1 | not found |
| 1 | 1 | 1 | 1    | 1 | 1 | 0 | 1 | 10 | 2 | not found |
| 1 | 1 | 1 | 1    | 1 | 1 | 1 | 1 | 11 | 2 | not found |

7

Tabelle1

|    |     |      |                                                                                                                                                                                                                                                                                                                                              |                |   |   |   |
|----|-----|------|----------------------------------------------------------------------------------------------------------------------------------------------------------------------------------------------------------------------------------------------------------------------------------------------------------------------------------------------|----------------|---|---|---|
| RR | 161 | 2015 | Sedation and Anesthesia Options for Diagnostic Procedures: A Review of Clinical Effectiveness and Guidelines                                                                                                                                                                                                                                 | no protocol    | 1 | 1 | 1 |
| RR | 162 | 2014 | Meneer M, Briand C.. Implementing a continuum of evidence-based psychosocial interventions for people with severe mental illness: part 1-review of major initiatives and implementation strategies. <i>Can J Psychiatry</i> (2014) 59(4):178–86.                                                                                             | no protocol    | 0 | 1 | 1 |
| RR | 163 | 2014 | Saeed S, Golfam M, Beall RF, Ashbury FD, Palmer LJ, Little J. Effectiveness of individual-focused interventions to prevent chronic disease. <i>Eur J Clin Invest</i> 2014;44:883–91.                                                                                                                                                         | none mentioned | 1 | 1 | 1 |
| RR | 164 | 2015 | Sara A Kreindler, Yang Cui, Colleen J Metge, Melissa Raynard, Patient characteristics associated with longer emergency department stay: a rapid review, <i>Emerg Med J</i> 2016;33:3 194-199 Published Online First: 4 September 2015 doi:10.1136/emered-2015-204913                                                                         | yes            | 1 | 0 | 0 |
| RR | 165 | 2015 | Chetan R Trivedy, Matthew W Cooke, Unscheduled return visits (URV) in adults to the emergency department (ED): a rapid evidence assessment policy review, <i>Emerg Med J</i> 2015;32:4 324-329 Published Online First: 28 October 2013 doi:10.1136/emered-2013-202719                                                                        | none mentioned | 1 | 0 | 1 |
| RR | 166 | 2014 | J. Yu, Y. Wang, Y. Li, X. Li, C. Li, J.T. Shen, PHP74 - The DA Vinci Surgical System: A Rapid Review of the Clinical and Economic Evidence, <i>Value in Health</i> , Volume 17, Issue 7, November 2014, Page A798, ISSN 1098-3015, <a href="http://dx.doi.org/10.1016/j.jval.2014.08.476">http://dx.doi.org/10.1016/j.jval.2014.08.476</a> . | none mentioned | 1 | 1 | 0 |
| RR | 167 | 2014 | Lal S, Adair CE. E-mental health: a rapid review of the literature. <i>Psychiatr Serv</i> . 2014;65:24–32.                                                                                                                                                                                                                                   | none mentioned | 1 | 0 | 0 |
| RR | 168 | 2014 | Beall RF, Baskerville N, Golfam M, Saeed S, Little J. Modes of delivery in prevention intervention studies: a rapid review. <i>Eur J Clin Invest</i> 2014;44:688–96. DOI: 10.1111/eci.12279                                                                                                                                                  | yes            | 1 | 1 | 1 |
| RR | 169 | 2013 | Jiwa, M., McManus, A., and Dadich, A. (2013) Continuity of cancer care: Where do primary care practitioners fit in? <i>Cancer Forum</i> , 37(1): 31-34.                                                                                                                                                                                      | yes            | 1 | 0 | 0 |
| RR | 170 | 2014 | Movement Therapies for the Self-Management of Chronic Pain Symptoms, Courtney Lee, Cindy Crawford, Eric Schoomaker, Active Self-Care Therapies for Pain (PACT) Working Group, <i>Pain Medicine</i> Apr 2014, 15 (S1) S40-S53; DOI: 10.1111/pme.12411                                                                                         | yes            | 1 | 1 | 1 |
| RR | 171 | 2012 | Boyce T, Holmes A (2012) Addressing Health Inequalities in the Delivery of the Human Papillomavirus Vaccination Programme: Examining the Role of the School Nurse. <i>PLoS ONE</i> 7(9): e43416. doi:10.1371/journal.pone.0043416                                                                                                            | none mentioned | 1 | 0 | 0 |
| RR | 172 | 2011 | Attree P, French B, Milton B, Povall S, Whitehead M, Popay J. The experience of community engagement for individuals: a rapid review of evidence. <i>Health &amp; Social Care In The Community</i> [serial online]. May 2011;19(3):250-260. Available from: MEDLINE, Ipswich, MA. doi: 10.1111/j.1365-2524.2010.00976.x                      | none mentioned | 1 | 0 | 1 |
| RR | 173 | 2014 | Sensory Art Therapies for the Self-Management of Chronic Pain Symptoms, Cindy Crawford, Courtney Lee, John Bingham, Active Self-Care Therapies for Pain (PACT) Working Group, <i>Pain Medicine</i> Apr 2014, 15 (S1) S66-S75; DOI: 10.1111/pme.12409                                                                                         | none mentioned | 1 | 0 | 0 |

Tabelle1

|   |   |   |   |   |   |   |   |   |   |           |   |
|---|---|---|---|---|---|---|---|---|---|-----------|---|
| 1 | 1 | 1 | 1 | 1 | 1 | 0 | 0 | 9 | 2 | not found | 9 |
| 0 | 0 | 0 | 0 | 0 | 0 | 0 | 1 | 3 | 0 | not found |   |
| 0 | 0 | 0 | 0 | 0 | 1 | 0 | 0 | 4 | 1 | not found | 4 |
| 0 | 1 | 1 | 0 | 0 | 0 | 0 | 1 | 4 | 1 | not found |   |
| 0 | 0 | 0 | 0 | 0 | 1 | 0 | 1 | 4 | 1 | not found | 4 |
| 0 | 0 | 0 | 0 | 0 | 0 | 0 | 0 | 2 | 0 | not found |   |
| 0 | 0 | 0 | 0 | 0 | 0 | 0 | 1 | 2 | 0 | not found |   |
| 0 | 0 | 0 | 0 | 0 | 0 | 0 | 0 | 3 | 0 | not found |   |
| 0 | 0 | 0 | 0 | 1 | 0 | 0 | 0 | 2 | 0 | not found |   |
| 0 | 0 | 1 | 1 | 0 | 0 | 0 | 1 | 6 | 1 | not found | 6 |
| 0 | 0 | 0 | 0 | 0 | 0 | 0 | 1 | 2 | 0 | not found |   |
| 0 | 0 | 0 | 0 | 0 | 0 | 0 | 1 | 3 | 0 | not found |   |
| 0 | 0 | 1 | 1 | 1 | 0 | 1 | 1 | 6 | 1 | not found |   |

Tabelle1

|    |     |      |                                                                                                                                                                                                                                                                                                                                                                                                  |                |   |   |   |
|----|-----|------|--------------------------------------------------------------------------------------------------------------------------------------------------------------------------------------------------------------------------------------------------------------------------------------------------------------------------------------------------------------------------------------------------|----------------|---|---|---|
| RR | 174 | 2013 | Ndumbe-Eyoh S, Moffatt H. Intersectoral action for health equity: a rapid systematic review. <i>BMC Public Health</i> . 2013;13:1056-2458-13-1056. DOI: 10.1186/1471-2458-13-1056                                                                                                                                                                                                                | yes            | 1 | 1 | 1 |
| RR | 175 | 2014 | Brunton, G., Paraskeva, N., Caird, J., Bird, K. S., Kavanagh, J., Kwan, I., & ... Thomas, J. (2014). Psychosocial predictors, assessment, and outcomes of cosmetic procedures: a systematic rapid evidence assessment. <i>Aesthetic Plastic Surgery</i> , 38(5), 1030-1040. doi:10.1007/s00266-014-0369-4                                                                                        | yes            | 1 | 0 | 1 |
| RR | 176 | 2011 | Geddes et al., 2011, R. Geddes, J. Frank, S. Haw, A rapid review of key strategies to improve the cognitive and social development of children in Scotland, <i>Health Policy</i> , 101 (2011), pp. 20–28 doi:10.1016/j.healthpol.2010.08.013                                                                                                                                                     | none mentioned | 1 | 1 | 1 |
| RR | 177 | 2013 | Humphreys, DK, Ogilvie, D. Synthesising evidence for equity impacts of population-based physical activity interventions: A pilot study. <i>Int J Behav Nutr Phys Act</i> . 2013;10:76. DOI: 10.1186/1479-5868-10-76                                                                                                                                                                              | none mentioned | 1 | 0 | 1 |
| RR | 178 | 2014 | Muñoz, K., Caballero, A., & White, K. (2014). Effectiveness of questionnaires for screening hearing of school-age children: a comprehensive literature review. <i>International Journal Of Audiology</i> , 53(12), 910-914. doi:10.3109/14992027.2014.943846                                                                                                                                     | yes            | 1 | 0 | 1 |
| RR | 179 | 2014 | Physically Oriented Therapies for the Self-Management of Chronic Pain Symptoms, Cindy Crawford, Courtney Lee, Todd May, Active Self-Care Therapies for Pain (PACT) Working Group, <i>Pain Medicine</i> Apr 2014, 15 (S1) S54-S65; DOI: 10.1111/pme.12410                                                                                                                                         | none mentioned | 1 | 1 | 1 |
| RR | 180 | 2014 | Moe-Byrne, T., Chambers, D., Harden, M., McDaid, C., Behaviour change interventions to promote prescribing of generic drugs: A rapid evidence synthesis and systematic review (2014) <i>BMJ Open</i> , 4 (5), art. no. e004623. doi: 10.1136/bmjopen-2013-004623                                                                                                                                 | yes            | 1 | 1 | 1 |
| RR | 181 | 2014 | Hithersay R, Strydom A, Moulster G & Buszewicz M (2014) Carer-led health interventions to monitor, promote and improve the health of adults with intellectual disabilities in the community: a systematic review. <i>Research in Developmental Disabilities</i> 35, 887–907. doi: 10.1016/j.ridd.2014.01.010                                                                                     | yes            | 1 | 1 | 1 |
| RR | 182 | 2011 | Mann R, Gilbody S. Validity of two case finding questions to detect postnatal depression: a review of diagnostic test accuracy. <i>J Affect Disord</i> . 2011;133:388–97. doi:10.1016/j.jad.2010.11.015.                                                                                                                                                                                         | yes            | 1 | 0 | 1 |
| RR | 183 | 2013 | Barry, M. M., D'Eath, M., & Sixsmith, J. (2013). Interventions for improving population health literacy: insights from a rapid review of the evidence. <i>Journal Of Health Communication</i> , 18(12), 1507-1522. doi:10.1080/10810730.2013.840699                                                                                                                                              | yes            | 1 | 1 | 1 |
| RR | 184 | 2013 | Beck, C. R., Sokal, R., Arunachalam, N., Puleston, R., Cichowska, A., Kessel, A., Zambon, M., Nguyen-Van-Tam, J. S. and on behalf of the UK Antiviral Effectiveness Review Group (2013), Neuraminidase inhibitors for influenza: a review and public health perspective in the aftermath of the 2009 pandemic. <i>Influenza and Other Respiratory Viruses</i> , 7: 14–24. doi: 10.1111/irv.12048 |                | 1 | 1 | 0 |

Tabelle1

|   |   |   |   |   |   |   |   |   |    |                                                                                     |      |    |
|---|---|---|---|---|---|---|---|---|----|-------------------------------------------------------------------------------------|------|----|
| 1 | 0 | 1 | 1 | 1 | 1 | 1 | 1 | 1 | 10 | 2                                                                                   | 7/10 | 10 |
| 1 | 0 | 0 | 1 | 1 | 1 | 0 | 1 | 7 | 1  | not found                                                                           | 7    |    |
| 0 | 0 | 0 | 0 | 0 | 0 | 0 | 0 | 3 | 0  | not found                                                                           |      |    |
| 0 | 0 | 0 | 0 | 0 | 1 | 0 | 1 | 4 | 1  | not found                                                                           |      |    |
| 0 | 0 | 1 | 0 | 0 | 0 | 0 | 1 | 4 | 1  | 6<br>(moderate)                                                                     |      |    |
| 0 | 0 | 1 | 1 | 1 | 1 | 1 | 1 | 9 | 2  | not found<br>na (no<br>rating tool<br>available<br>for this type<br>of<br>document) | 9    |    |
| 0 | 0 | 1 | 1 | 0 | 0 | 0 | 1 | 6 | 1  | not found                                                                           |      |    |
| 0 | 0 | 1 | 1 | 1 | 0 | 1 | 1 | 7 | 1  | not found                                                                           |      |    |
| 0 | 0 | 1 | 1 | 1 | 1 | 1 | 0 | 8 | 2  | 7<br>(moderate)                                                                     | 8    |    |
| 0 | 0 | 0 | 0 | 0 | 1 | 0 | 1 | 4 | 1  | not found                                                                           | 4    |    |



Tabelle1

|                                      |     |      |                                                                                                                                                                                                                                                                                                                                                                     |                |   |   |   |
|--------------------------------------|-----|------|---------------------------------------------------------------------------------------------------------------------------------------------------------------------------------------------------------------------------------------------------------------------------------------------------------------------------------------------------------------------|----------------|---|---|---|
| RR                                   | 185 | 2012 | McMurrin, M. (2012). Individual-level interventions for alcohol-related violence: a rapid evidence assessment. <i>Criminal Behaviour And Mental Health: CBMH</i> , 22(1), 14-28. doi:10.1002/cbm.821                                                                                                                                                                | yes            | 1 | 0 | 1 |
| RR                                   | 186 | 2014 | Paul M. Dorresteijn, Norbertus A. Ipenburg, Kathryn J. Murphy, Michelle Smit, Jonna K. van Vulpen, Inge Wegner, Inge Stegeman, and Wilko Grolman, Rapid Systematic Review of Normal Audiometry Results as a Predictor for Benign Paroxysmal Positional Vertigo. <i>Otolaryngology -- Head and Neck Surgery</i> June 2014 150: 919-924, doi:10.1177/0194599814527233 | none mentioned | 1 | 1 | 1 |
| RR                                   | 187 | 2012 | KONNYU, K., KWOK, E., SKIDMORE, B., MOHER, D.. The effectiveness and safety of emergency department short stay units: a rapid review. <i>Open Medicine, North America</i> , 6, jan. 2012. Available at: <a href="http://www.openmedicine.ca/article/view/478/449">http://www.openmedicine.ca/article/view/478/449</a> .                                             | no protocol    | 1 | 1 | 1 |
| RR                                   | 188 | 2015 | Butow, P., Price, M. A., Shaw, J. M., Turner, J., Clayton, J. M., Grimison, P., Rankin, N., and Kirsten, L. (2015) Clinical pathway for the screening, assessment and management of anxiety and depression in adult cancer patients: Australian guidelines. <i>Psycho-Oncology</i> , 24: 987–1001. doi: 10.1002/pon.3920.                                           | no protocol    | 1 | 1 | 1 |
| RR                                   | 189 | 2014 | R.B. Costello, C.V. Lentino, C.C. Boyd, M.L. O'Connell, C.C. Crawford, M.L. Sprengel, et al., The effectiveness of melatonin for promoting healthy sleep: a rapid evidence assessment of the literature, <i>Nutr. J.</i> , 13 (2014), p. 106 DOI: 10.1186/1475-2891-13-106                                                                                          | not published  | 1 | 0 | 1 |
| RR                                   | 190 | 2014 | Lee, C., Crawford, C., & Swann, S. (2014). Multimodal, integrative therapies for the self-management of chronic pain symptoms. <i>Pain Medicine (Malden, Mass.)</i> , 15 Suppl 1S76-S85. doi:10.1111/pme.12408                                                                                                                                                      | yes            | 1 | 0 | 1 |
| <b>Rapid reviews (CRD databases)</b> |     |      |                                                                                                                                                                                                                                                                                                                                                                     |                |   |   |   |
| CRD RR                               | 191 | 2015 | Health Quality Ontario. Prophylactic antibiotics for individuals with chronic obstructive pulmonary disease (COPD): a rapid review. Health Quality Ontario; 2015 February. 26 p. Available from: <a href="http://www.hqontario.ca/evidence/evidence-process/episodes-of-">http://www.hqontario.ca/evidence/evidence-process/episodes-of-</a>                        | none mentioned | 1 | 0 | 1 |
| CRD RR                               | 192 | 2013 | Ghazipura M. Community versus inpatient rehabilitation in hip fracture patients: a rapid review. Toronto, Ontario; 2013 Apr. 23 p. Available from: <a href="http://www.hqontario.ca/evidence/publications-and-ohac-recommendations/rapid-reviews">http://www.hqontario.ca/evidence/publications-and-ohac-recommendations/rapid-reviews</a> .                        | none mentioned | 1 | 0 | 0 |
| CRD RR                               | 193 | 2015 | Health Quality Ontario. Sodium restriction in heart failure: a rapid review. Toronto: Health Quality Ontario; 2015 February. 20 p. Available from: <a href="http://www.hqontario.ca/evidence/evidence-process/episodes-of-care#community-chf">http://www.hqontario.ca/evidence/evidence-process/episodes-of-care#community-chf</a>                                  | none mentioned | 1 | 0 | 1 |
| CRD RR                               | 194 | 2014 | Lambrinos, A. Preoperative consultations: a rapid review. Toronto: Health Quality Ontario; 2014 March. 19 p. Available from: <a href="http://www.hqontario.ca/evidence/evidence-process/appropriateness-initiative#preop-consult">http://www.hqontario.ca/evidence/evidence-process/appropriateness-initiative#preop-consult</a> .                                  | none mentioned | 1 | 0 | 1 |

Tabelle1

|   |   |   |   |   |    |   |   |    |   |                                                                                     |           |  |
|---|---|---|---|---|----|---|---|----|---|-------------------------------------------------------------------------------------|-----------|--|
| 0 | 0 | 1 | 0 | 0 | 0  | 0 | 0 | 0  | 3 | 0                                                                                   | not found |  |
| 0 | 0 | 1 | 1 | 1 | 0  | 0 | 1 | 7  | 1 | not found<br>na (no<br>rating tool<br>available<br>for this type<br>of<br>document) | 9         |  |
| 1 | 0 | 1 | 1 | 1 | 1  | 0 | 1 | 9  | 2 |                                                                                     |           |  |
| 0 | 0 | 0 | 0 | 0 | 0  | 0 | 0 | 3  | 0 | not found                                                                           | 3         |  |
| 0 | 0 | 1 | 0 | 0 | 1  | 0 | 1 | 5  | 1 | not found                                                                           | 5         |  |
| 0 | 0 | 1 | 1 | 1 | 0  | 1 | 1 | 7  | 1 | not found                                                                           | 7         |  |
|   |   |   |   |   |    |   |   | 4  |   |                                                                                     | 7         |  |
| 1 | 1 | 1 | 1 | 1 | 1  | 1 | 1 | 10 | 2 | not found                                                                           |           |  |
| 0 | 0 | 1 | 1 | 1 | na | 1 | 1 | 6  | 1 | not found                                                                           |           |  |
| 1 | 0 | 1 | 1 | 1 | 1  | 1 | 1 | 9  | 2 | not found                                                                           |           |  |
| 0 | 0 | 1 | 1 | 1 | 1  | 1 | 1 | 8  | 2 | not found                                                                           |           |  |

Tabelle1

|        |     |      |                                                                                                                                                                                                                                                                                                                                                                                                                                                |                |   |   |   |
|--------|-----|------|------------------------------------------------------------------------------------------------------------------------------------------------------------------------------------------------------------------------------------------------------------------------------------------------------------------------------------------------------------------------------------------------------------------------------------------------|----------------|---|---|---|
| CRD RR | 195 | 2013 | Ling D. Role of screening for respiratory syncytial virus or influenza and empirical antiviral treatment for patients with community-acquired pneumonia: a rapid review. Toronto, ON: Health Quality Ontario; 2013 November. 17 p. Available from: <a href="http://www.hqontario.ca/evidence/publications-and-ohtac-recommendations/rapid-reviews">http://www.hqontario.ca/evidence/publications-and-ohtac-recommendations/rapid-reviews</a> . | none mentioned | 1 | 0 | 1 |
| CRD RR | 196 | 2015 | Health Quality Ontario. Communication of discharge instructions: a rapid review. Toronto: Health Quality Ontario; 2015 February. 18 p. Available from: <a href="http://www.hqontario.ca/evidence/evidence-process/episodes-of-care#community-chf">http://www.hqontario.ca/evidence/evidence-process/episodes-of-care#community-chf</a> .                                                                                                       | none mentioned | 1 | 0 | 1 |
| CRD RR | 197 | 2013 | Ghazipura M. Optimal Timing for Antibiotic Administration in Patients with Community-Acquired Pneumonia. Toronto, ON: Health Quality Ontario; 2013 November. 23 p. Available from: <a href="http://www.hqontario.ca/evidence/publications-and-ohtac-recommendations/rapid-reviews">http://www.hqontario.ca/evidence/publications-and-ohtac-recommendations/rapid-reviews</a> .                                                                 | none mentioned | 1 | 0 | 1 |
| CRD RR | 198 | 2013 | McCurdy BR. Action plans for individuals with chronic obstructive pulmonary disease (COPD): a rapid review. Toronto, ON: Health Quality Ontario; 2013 Jan. 20 p. Available from: <a href="http://www.hqontario.ca/evidence/publications-and-ohtac-recommendations/rapid-reviews">www.hqontario.ca/evidence/publications-and-ohtac-recommendations/rapid-reviews</a>                                                                            | none mentioned | 1 | 0 | 1 |
| CRD RR | 199 | 2015 | Wang M. Pulmonary rehabilitation in the home versus other settings for individuals with chronic obstructive pulmonary disease (COPD): a rapid review. Toronto: Health Quality Ontario; 2015 February. 23 p. Available from: <a href="http://www.hqontario.ca/evidence/ev">http://www.hqontario.ca/evidence/ev</a>                                                                                                                              | none mentioned | 1 | 0 | 1 |
| CRD RR | 200 | 2013 | Bungay, H., & Vella-Burrows, T. (2013). The effects of participating in creative activities on the health and well-being of children and young people: A rapid review of the literature. <i>Perspectives in Public Health</i> , 133(1), 44–52.                                                                                                                                                                                                 | none mentioned | 1 | 0 | 1 |
| CRD RR | 201 | 2015 | Lambrinos A. Home-based exercise programs in heart failure: a rapid review. Toronto: Health Quality Ontario; 2015 February. 21 p. Available from: <a href="http://www.hqontario.ca/evidence/evidence-process/episodes-of-care#community-chf">http://www.hqontario.ca/evidence/evidence-process/episodes-of-care#community-chf</a> .                                                                                                            | none mentioned | 1 | 0 | 1 |
| CRD RR | 202 | 2015 | Health Quality Ontario. Home-based versus centre-based rehabilitation for community-dwelling postacute stroke patients: an economic rapid review. Toronto: Health Quality Ontario; 2015 February. 23 p. Available from: <a href="http://www.hqontario.ca/evidence/evidence-process/episodes-of-care#community-chf">http://www.hqontario.ca/evidence/evidence-process/episodes-of-care#community-chf</a> .                                      | none mentioned | 1 | 0 | 1 |
| CRD RR | 203 | 2013 | Nikitovic M. Intensity of rehabilitation after hip fracture: a rapid review. Toronto, ON: Health Quality Ontario; 2013 Apr. 17 p. Available from: <a href="http://www.hqontario.ca/evidence/publications-and-ohtac-recommendations/rapid-reviews">http://www.hqontario.ca/evidence/publications-and-ohtac-recommendations/rapid-reviews</a> .                                                                                                  | none mentioned | 1 | 0 | 1 |

Tabelle1

|   |   |    |    |    |    |    |   |   |   |   |                                                                                     |
|---|---|----|----|----|----|----|---|---|---|---|-------------------------------------------------------------------------------------|
| 1 | 0 | na | na | na | na |    | 1 | 1 | 5 | 1 | not found<br>na (no<br>rating tool<br>available<br>for this type<br>of<br>document) |
| 1 | 0 | na | na | na | na |    | 1 | 1 | 5 | 1 | not found<br>na (no<br>rating tool<br>available<br>for this type<br>of<br>document) |
| 1 | 0 | 0  | 0  | 1  | 1  | 1  | 1 | 1 | 8 | 1 | not found<br>na (no<br>rating tool<br>available<br>for this type<br>of<br>document) |
| 1 | 0 | 1  | 1  | 1  | 1  | na | 1 | 1 | 8 | 2 | not found<br>na (no<br>rating tool<br>available<br>for this type<br>of<br>document) |
| 1 | 0 | 0  | 0  | 1  | 1  | 1  | 1 | 1 | 8 | 2 | not found<br>na (no<br>rating tool<br>available<br>for this type<br>of<br>document) |
| 1 | 0 | 1  | 1  | 1  | 1  | 1  | 1 | 0 | 8 | 2 | 6<br>(moderate)                                                                     |
| 1 | 0 | 1  | 1  | 1  | 1  | 1  | 1 | 1 | 9 | 2 | not found<br>na (no<br>rating tool<br>available<br>for this type<br>of<br>document) |
| 1 | 0 | 0  | 0  | 0  | 0  | 0  | 1 | 1 | 5 | 1 | not found<br>na (no<br>rating tool<br>available<br>for this type<br>of<br>document) |
| 1 | 0 | na | na | na | na |    | 1 | 1 | 5 | 1 | not found                                                                           |

Tabelle1

|        |     |      |                                                                                                                                                                                                                                                                                                                                                                 |                |   |   |   |
|--------|-----|------|-----------------------------------------------------------------------------------------------------------------------------------------------------------------------------------------------------------------------------------------------------------------------------------------------------------------------------------------------------------------|----------------|---|---|---|
| CRD RR | 204 | 2015 | Self-management and educational interventions in the postacute stroke population: a rapid review. Toronto, ON: Health Quality Ontario; 2015 February. 23 p. Available from: <a href="http://www.hqontario.ca/evidence/evidence-process/episodes-of-care#community-strok">http://www.hqontario.ca/evidence/evidence-process/episodes-of-care#community-strok</a> | none mentioned | 1 | 0 | 1 |
| CRD RR | 205 | 2015 | Health Quality Ontario. Criteria for referral to home care: a rapid review. Toronto: Health Quality Ontario; 2015 February. 20 p. Available from: <a href="http://www.hqontario.ca/evidence/evidence-process/episodes-of-care#community-chf">http://www.hqontario.ca/evidence/evidence-process/episodes-of-care#community-chf</a> .                             | none mentioned | 1 | 0 | 1 |
| CRD RR | 206 | 2014 | Baidoobonso S. Effect of supportive interventions on informal caregivers of people at the end of life: a rapid review. Toronto: Health Quality Ontario; 2014 December. 25 p. Available from: <a href="http://www.hqontario.ca/evidence/publications-and-ohtac-recommenda">http://www.hqontario.ca/evidence/publications-and-ohtac-recommenda</a>                | none mentioned | 1 | 0 | 0 |
| CRD RR | 207 | 2014 | Miani C, Ball S, Pitchforth E, Exley J, King S, Roland M, et al. Organisational interventions to reduce length of stay in hospital: a rapid evidence assessment. Health Serv Deliv Res 2014;2(52). DOI: 10.3310/hsdr02520                                                                                                                                       | yes            | 1 | 1 | 1 |
| CRD RR | 208 | 2015 | Wang M. Airway clearance techniques for patients with stable chronic obstructive pulmonary disease (COPD): a rapid review. Toronto: Health Quality Ontario; 2015 February. 23 p. Available from: <a href="http://www.hqontario.ca/evidence/evidence-process/episodes-of-">http://www.hqontario.ca/evidence/evidence-process/episodes-of-</a>                    | none mentioned | 1 | 0 | 1 |
| CRD RR | 209 | 2015 | Health Quality Ontario. Exercise programs after pulmonary rehabilitation for patients with chronic obstructive pulmonary disease (COPD). Toronto: Health Quality Ontario; 2015 February. 20 p. Available from: <a href="http://www.hqontario.ca/evidence/evidence-proces">http://www.hqontario.ca/evidence/evidence-proces</a>                                  | none mentioned | 1 | 0 | 1 |
| CRD RR | 210 | 2015 | Health Quality Ontario. Respiratory services in home care for individuals with chronic obstructive pulmonary disease (COPD): a rapid review. Toronto: Health Quality Ontario; 2015 February. 20 p. Available from: <a href="http://www.hqontario.ca/evidence/evidence-pr">http://www.hqontario.ca/evidence/evidence-pr</a>                                      | none mentioned | 1 | 0 | 1 |
| CRD RR | 211 | 2013 | Brener S. Optimal timing to begin an active rehabilitation program after a hip fracture: a rapid review. Toronto, ON: Health Quality Ontario; 2013 Apr. 20 p. Available from: <a href="http://www.hqontario.ca/evidence/publications-and-ohtac-recommendations/rapid-re">http://www.hqontario.ca/evidence/publications-and-ohtac-recommendations/rapid-re</a>   | none mentioned | 1 | 0 | 1 |
| CRD RR | 212 | 2013 | Schaik A. The effectiveness of statins for primary prevention: a rapid review. Toronto, ON: Health Quality Ontario; 2013 Feb. 23 p. Available from: <a href="http://www.hqontario.ca/evidence/publications-and-ohtac-recommendations/rapid-reviews">http://www.hqontario.ca/evidence/publications-and-ohtac-recommendations/rapid-reviews</a> .                 | none mentioned | 1 | 0 | 1 |

Tabelle1

|   |   |   |   |      |   |   |   |    |   |                                                                                     |
|---|---|---|---|------|---|---|---|----|---|-------------------------------------------------------------------------------------|
| 1 | 0 | 0 | 1 | 1    | 0 | 1 | 1 | 7  | 1 | not found                                                                           |
| 1 | 0 | 1 | 1 | 1    | 0 | 1 | 1 | 8  | 2 | not found<br>na (no<br>rating tool<br>available<br>for this type<br>of<br>document) |
| 0 | 0 | 1 | 1 | 1    | 0 | 1 | 1 | 6  | 1 | na (no<br>rating tool<br>available<br>for this type<br>of<br>document)              |
| 1 | 1 | 1 | 1 | 1    | 1 | 1 | 1 | 11 | 2 | document)                                                                           |
| 1 | 0 | 1 | 1 | 1    | 0 | 1 | 1 | 8  | 2 | not found                                                                           |
| 1 | 0 | 0 | 1 | 1    | 0 | 1 | 1 | 7  | 1 | not found                                                                           |
| 1 | 0 | 1 | 1 | 1    | 0 | 1 | 1 | 8  | 2 | not found                                                                           |
| 1 | 0 | 1 | 1 | 1 na |   | 1 | 1 | 8  | 2 | not found                                                                           |
| 1 | 0 | 1 | 1 | 1    | 1 | 1 | 1 | 9  | 2 | not found                                                                           |

Tabelle1

|        |     |      |                                                                                                                                                                                                                                                                                                                                                                   |                |   |   |   |
|--------|-----|------|-------------------------------------------------------------------------------------------------------------------------------------------------------------------------------------------------------------------------------------------------------------------------------------------------------------------------------------------------------------------|----------------|---|---|---|
| CRD RR | 213 | 2015 | Health Quality Ontario. Physical activity counselling: a rapid review. Toronto: Health Quality Ontario; 2015 February. 20 p. Available from: <a href="http://www.hqontario.ca/evidence/evidence-process/episodes-of-care#community-chf">http://www.hqontario.ca/evidence/evidence-process/episodes-of-care#community-chf</a> .                                    | none mentioned | 1 | 0 | 1 |
| CRD RR | 214 | 2015 | Health Quality Ontario. Cognitive-behavioural therapy for anxiety and depression in patients with COPD: a rapid review. Toronto: Health Quality Ontario; 2015 February. 21 p. Available from: <a href="http://www.hqontario.ca/evidence/evidence-process/episodes-of-care">http://www.hqontario.ca/evidence/evidence-process/episodes-of-care</a> .               | none mentioned | 1 | 0 | 1 |
| CRD RR | 215 | 2015 | Ghazipura M. Cardiovascular and aerobic exercise in postacute stroke patients: a rapid review. Toronto, ON: Health Quality Ontario; 2015 February. 17 p. Available from: <a href="http://www.hqontario.ca/evidence/evidence-process/episodes-of-care#community-stroke">http://www.hqontario.ca/evidence/evidence-process/episodes-of-care#community-stroke</a> .  | none mentioned | 1 | 0 | 1 |
| CRD RR | 216 | 2015 | Health Quality Ontario. Aerobic exercise training in patients with heart failure: a rapid review. Toronto: Health Quality Ontario; 2015 February. 19 p. Available from: <a href="http://www.hqontario.ca/evidence/evidence-process/episodes-of-care#community-chf">http://www.hqontario.ca/evidence/evidence-process/episodes-of-care#community-chf</a> .         | none mentioned | 1 | 0 | 1 |
| CRD RR | 217 | 2015 | Health Quality Ontario. Care coordination for postacute stroke, chronic obstructive pulmonary disease, and heart failure clients: an economic rapid review. Toronto: Health Quality Ontario; 2015 February. 20 p. Available from: <a href="http://www.hqontario.ca/evidence">http://www.hqontario.ca/evidence</a> .                                               | none mentioned | 1 | 0 | 1 |
| CRD RR | 218 | 2015 | Lambrinos A. Medication reconciliation at discharge: a rapid review. Toronto: Health Quality Ontario; 2015 February. 24 p. Available from: <a href="http://www.hqontario.ca/evidence/evidence-process/episodes-of-care#community-chf">http://www.hqontario.ca/evidence/evidence-process/episodes-of-care#community-chf</a> .                                      | none mentioned | 1 | 0 | 1 |
| CRD RR | 219 | 2013 | McCurdy BR. Inhospital physiotherapy for acute exacerbations of chronic obstructive pulmonary disease (AECOPD): a rapid review. Toronto, ON: Health Quality Ontario; 2012 Dec. 28 p. Available from: <a href="http://www.hqontario.ca/evidence/publications-and-ohrac-recommend">www.hqontario.ca/evidence/publications-and-ohrac-recommend</a> .                 | none mentioned | 1 | 0 | 1 |
| CRD RR | 220 | 2013 | Health Quality Ontario. Effectiveness and safety of thrombolytics for ischemic stroke: a rapid review. Toronto, ON: Health Quality Ontario; 2013 Jan. 25 p. Available from: <a href="http://www.hqontario.ca/evidence/publications-and-ohrac-recommendations/rapid-revi">http://www.hqontario.ca/evidence/publications-and-ohrac-recommendations/rapid-revi</a> . | none mentioned | 1 | 0 | 1 |

Tabelle1

|   |   |    |    |    |    |   |   |         |   |                                                         |
|---|---|----|----|----|----|---|---|---------|---|---------------------------------------------------------|
| 1 | 0 | 1  | 1  | 1  | 0  | 1 | 1 | 8       | 2 | not found                                               |
| 1 | 0 | 0  | 1  | 1  | 1  | 1 | 1 | 8       | 2 | not found                                               |
| 1 | 0 | 1  | 1  | 1  | 1  | 1 | 1 | 9       | 2 | not found                                               |
| 1 | 0 | 1  | 1  | 1  | 1  | 1 | 1 | 9       | 2 | not found                                               |
| 1 | 0 | na | na | na | na | 1 | 1 | 5       | 1 | na (no rating tool available for this type of document) |
| 1 | 0 | 1  | 1  | 1  | 1  | 1 | 1 | 9       | 2 | not found                                               |
| 1 | 0 | 0  | 1  | 0  | 1  | 1 | 1 | 7       | 1 | not found                                               |
| 1 | 0 | 1  | 1  | 1  | 1  | 1 | 1 | 9       | 2 | not found                                               |
|   |   |    |    |    |    |   |   | 8       |   |                                                         |
|   |   |    |    |    |    |   |   | median  |   |                                                         |
|   |   |    |    |    |    |   |   | amstar: | 8 |                                                         |
