# Supplementary material for: Characteristics of stakeholder involvement in systematic and rapid reviews: a methodological review in the area of health services research
Source: PubMed Central journal article supplement — BMJ Open. 2019 Aug 15;9(8):e024587. doi: 10.1136/bmjopen-2018-024587 (PMC6701675; doi:10.1136/bmjopen-2018-024587), 2019-08-15
Supplement: bmjopen-2018-024587supp006.pdf [file bmjopen-2018-024587supp006.pdf]

Tabelle1

## Characteristics of stakeholder involvement in systematic and rapid reviews: Study characteristics

### General Information

| Study type | Study ID | Year of study | version number | Citation                                                                                                                                                                                                                                                               | Institution performing review                                                                       | country | year | contact details, corresponding author (not shown) | specific topic                               | Thematic Focus | Type of intervention       | Setting specified                     | Setting            |
|------------|----------|---------------|----------------|------------------------------------------------------------------------------------------------------------------------------------------------------------------------------------------------------------------------------------------------------------------------|-----------------------------------------------------------------------------------------------------|---------|------|---------------------------------------------------|----------------------------------------------|----------------|----------------------------|---------------------------------------|--------------------|
| CSR        | 101      | 2012          | 1              | Olsen O, Clausen JA. Planned hospital birth versus planned home birth. <i>Cochrane Database of Systematic Reviews</i> 2012, Issue 9. Art. No.: CD000352. DOI: 10.1002/14651858.CD000352.pub2.                                                                          | General Practice and Section of General Practice, Department of Public Health, University of        | DNK     | 2012 |                                                   | childbirth                                   | Treatment      | Type of birth              | birth setting hospital/home           | Multiple           |
| CSR        | 102      | 2013          | 1              | Moi JHY, Sriranganathan MK, Edwards CJ, Buchbinder R. Lifestyle interventions for acute gout. <i>Cochrane Database of Systematic Reviews</i> 2013, Issue 11. Art. No.: CD010519. DOI: 10.1002/14651858.CD010519.pub2.                                                  | Department of Rheumatology, The Royal Melbourne Hospital, Parkville, Australia.                     | AUS     | 2013 |                                                   | Acute gout treatment                         | Treatment      | lifestyle interventions    | inpatients and outpatients            | multiple           |
| CSR        | 103      | 2011          | 1              | Thomas RE, Lorenzetti D, Spragins W. Mentoring adolescents to prevent drug and alcohol use. <i>Cochrane Database of Systematic Reviews</i> 2011, Issue 11. Art. No.: CD007381. DOI: 10.1002/14651858.CD007381.pub2.                                                    | University of Calgary, Department of Medicine, Calgary, Alberta, Canada                             | CAN     | 2011 |                                                   | drug/alcohol prevention                      | Prevention     | mentoring acts of any kind | mentoring programs                    | Multiple           |
| CSR        | 104      | 2012          | 1              | Garrison SR, Allan GM, Sekhon RK, Musini VM, Khan KM. Magnesium for skeletal muscle cramps. <i>Cochrane Database of Systematic Reviews</i> 2012, Issue 9. Art. No.: CD009402. DOI: 10.1002/14651858.CD009402.pub2.                                                     | University of British Columbia, Vancouver, BC, Canada                                               | CAN     | 2012 |                                                   | Skeletal muscle cramps                       | Treatment      | Magnesium supplementation  | outpatients (primary care, community) | Outpatient         |
| CSR        | 105      | 2012 update   |                | Tejani AM, Wasdell M, Spiwak R, Rowell G, Nathwani S. Carnitine for fatigue in multiple sclerosis. <i>Cochrane Database of Systematic Reviews</i> 2012, Issue 5. Art. No.: CD007280. DOI: 10.1002/14651858.CD007280.pub3.                                              | University of British Columbia, Vancouver, BC, Canada                                               | CAN     | 2012 |                                                   | Multiple Sclerosis fatigue                   | Treatment      | Carnitine supplementation  | outpatients                           | Outpatient         |
| CSR        | 106      | 2013 update   |                | Taylor F, Huffman MD, Macedo AF, Moore THM, Burke M, Davey Smith G, Ward K, Ebrahim S. Statins for the primary prevention of cardiovascular disease. <i>Cochrane Database of Systematic Reviews</i> 2013, Issue 1. Art. No.: CD004816. DOI: 10.1002/14651858.CD004816. | & Tropical Medicine, Department of Non-communicable Disease Epidemiology, London, UK                | GBR     | 2013 |                                                   | primary prevention of cardiovascular disease | Prevention     | statins                    | community setting                     | Community          |
| CSR        | 107      | 2013 update   |                | Jorge EC, Jorge EN, El Dib RP. Early light reduction for preventing retinopathy of prematurity in very low birth weight infants. <i>Cochrane Database of Systematic Reviews</i> 2013, Issue 8. Art. No.: CD000122. DOI: 10.1002/14651858.CD000122.pub2.                | Botucatu Medical School, Universidade Estadual Paulista (UNESP), Botucatu, São Paulo, Brazil        | BRA     | 2013 |                                                   | ROP prevention in premature infants          | Prevention     | light reduction            | hospital                              | Inpatient/Hospital |
| CSR        | 108      | 2012          | 1              | Jin H, Leng Q, Li C. Dietary flavonoid for preventing colorectal neoplasms. <i>Cochrane Database of Systematic Reviews</i> 2012, Issue 8. Art. No.: CD009350. DOI: 10.1002/14651858.CD009350.pub2.                                                                     | University of Traditional Chinese Medicine, National Center of Colorectal Surgery, Nanjing, Jiangsu | CHN     | 2012 |                                                   | colorectal neoplasm prevention               | Prevention     | Flavonoid intake           | community setting                     | Community          |

Tabelle1

| Population               | N      | overall age range | sex | Funding (who?)                                                               | notable conflicts of interests of authors           | review   | <b>Stakeholder involvement SHI</b> | <b>PRISMA</b>                            |
|--------------------------|--------|-------------------|-----|------------------------------------------------------------------------------|-----------------------------------------------------|----------|------------------------------------|------------------------------------------|
|                          |        |                   |     |                                                                              |                                                     | protocol | SHI: yes = 1, no = 0               | Procedure according to PRISMA-guidelines |
| Low risk pregnant women  | 11     | pregnant          | f   | governmental, institutional: National Institute for Health Research, UK.     | none                                                | yes      |                                    | 1                                        |
| adults with acute gout   | 19     | adult             | f/m | governmental, institutional                                                  | none                                                | yes      |                                    | 0                                        |
| adolescents              | 1994   | 13 - 18           | f/m | governmental, institutional                                                  | none                                                | yes      |                                    | 0                                        |
| adults                   | 406    | adult             | f/m | governmental, institutional: Canadian Institutes of Health Research          | and Khan are co-authors of a RCT which was included | yes      |                                    | 0                                        |
| adults with MS diagnosed | 36     | adult             | f/m | institutional: Fraser Health Research Administration and Development Office, | none                                                | yes      |                                    | 1                                        |
| adults                   | 56934  | adult             | f/m | institutional: Department of Social Medicine, University of Bristol, UK.,    | none                                                | yes      |                                    | 0                                        |
| Premature human infants  | 897    | premature         | f/m | institutional: University of Rochester, NY, USA., Department of              | served as a member of the Data Safety               | yes      |                                    | 0                                        |
| adults                   | 390769 | adult             | f/m | governmental, institutional                                                  | none                                                | yes      |                                    | 0                                        |

Tabelle1

|     |     |      |        |   |                                                                                                                                                                                                                                                                                                                         |                                                                                                  |      |                                                |                             |                        |                                      |                                  |                    |
|-----|-----|------|--------|---|-------------------------------------------------------------------------------------------------------------------------------------------------------------------------------------------------------------------------------------------------------------------------------------------------------------------------|--------------------------------------------------------------------------------------------------|------|------------------------------------------------|-----------------------------|------------------------|--------------------------------------|----------------------------------|--------------------|
| CSR | 109 | 2014 | update | 1 | Karmali KN, Davies P, Taylor F, Beswick A, Martin N, Ebrahim S. Promoting patient uptake and adherence in cardiac rehabilitation. <i>Cochrane Database of Systematic Reviews</i> 2014, Issue 6. Art. No.: CD007131. DOI: 10.1002/14651858.CD007131.pub3.                                                                | Feinberg School of Medicine, Departments of Preventive Medicine and Medicine (Cardiology), USA   | 2014 | Secondary prevention of cardiovascular disease | Prevention                  | cardiac rehabilitation | rehabilitation setting               | Inpatient/Hospital               |                    |
| CSR | 110 | 2014 |        | 1 | Bjelakovic G, Gluud LL, Nikolova D, Whitfield K, Krstic G, Wetterslev J, Gluud C. Vitamin D supplementation for prevention of cancer in adults. <i>Cochrane Database of Systematic Reviews</i> 2014, Issue 6. Art. No.: CD007469. DOI: 10.1002/14651858.CD007469.pub2.                                                  | Medical Faculty, University of Nis, Department of Internal Medicine, Nis, Serbia                 | SRB  | 2014                                           | Cancer Prevention           | Prevention             | Vitamin D supplementation            | community setting                | Community          |
| CSR | 111 | 2014 |        | 1 | Carney T, Myers BJ, Louw J, Okwundu CI. Brief school-based interventions and behavioural outcomes for substance-using adolescents. <i>Cochrane Database of Systematic Reviews</i> 2014, Issue 2. Art. No.: CD008969. DOI: 10.1002/14651858.CD008969.pub2.                                                               | Research Council, Alcohol and Drug Abuse Research Unit, Cape Town, Western Cape, South Africa    | ZAF  | 2014                                           | drug/alcohol prevention     | Prevention             | Brief Interventions (psychotherapy)  | High schools, colleges           | Community          |
| CSR | 112 | 2013 | update |   | Taylor MJ, Rudkin L, Bullemor-Day P, Lubin J, Chukwujekwu C, Hawton K. Strategies for managing sexual dysfunction induced by antidepressant medication. <i>Cochrane Database of Systematic Reviews</i> 2013, Issue 5. Art. No.: CD003382. DOI: 10.1002/14651858.CD003382.                                               | Institute of Psychiatry, King's College London, Department of Psychosis Studies, London, UK      | GBR  | 2013                                           | sexual dysfunction          | Treatment              | sildenafil, bupropion, etc.          | outpatients phase lia            | Outpatient         |
| CSR | 113 | 2012 |        | 1 | Fonner VA, Denison J, Kennedy CE, O'Reilly K, Sweat M. Voluntary counseling and testing (VCT) for changing HIV-related risk behavior in developing countries. <i>Cochrane Database of Systematic Reviews</i> 2012, Issue 9. Art. No.: CD001224. DOI: 10.1002/14651858.CD001224.                                         | School of Public Health, Department of International Health, Social and Behavioral Interventions | USA  | 2012                                           | HIV-prevention              | Prevention             | voluntary counseling and testing VCT | clinical, mobile or home setting | Multiple           |
| CSR | 114 | 2012 | update |   | Shields L, Zhou H, Pratt J, Taylor M, Hunter J, Pascoe E. Family-centred care for hospitalised children aged 0-12 years. <i>Cochrane Database of Systematic Reviews</i> 2012, Issue 10. Art. No.: CD004811. DOI: 10.1002/14651858.CD004811.pub3.                                                                        | Tropical Health Research Unit for Nursing and Midwifery Practice, Townsville, QLD, Australia     | AUS  | 2012                                           | pediatric care              | Treatment              | family-centred models of care        | hospital                         | Inpatient/Hospital |
| CSR | 115 | 2014 |        | 1 | Nava F, Ghilotti F, Maggi L, Hatemi G, Del Bianco A, Merlo C, Filippini G, Tramacere I. Biologics, colchicine, corticosteroids, immunosuppressants and interferon-alpha for Neuro-Behçet's Syndrome. <i>Cochrane Database of Systematic Reviews</i> 2014, Issue 12. Art. No.: CD009103. DOI: 10.1002/14651858.CD009103. | University of Milano-Bicocca, Faculty of Statistical Science, Milan, Italy                       | ITA  | 2014                                           | Neuro-Behçet Syndrome (NBS) | Treatment              | different treatments                 | inpatients and outpatients       | Multiple           |
| CSR | 116 | 2013 |        | 1 | Njei B, Kongnyuy EJ, Kumar S, Okwen MP, Sankar MJ, Mbuagbaw L. Optimal timing for antiretroviral therapy initiation in patients with HIV infection and concurrent cryptococcal meningitis. <i>Cochrane Database of Systematic Reviews</i> 2013, Issue 2. Art. No.: CD007796. DOI: 10.1002/14651858.CD007796.pub3.       | School of Medicine, Department of Medicine, Farmington, Connecticut, USA                         | USA  | 2013                                           | HIV treatment               | Treatment              | antiretroviral therapy               | outpatients                      | Outpatient         |
| CSR | 117 | 2014 |        | 1 | Lager KE, Mistri AK, Khunti K, Haunton VJ, Sett AK, Wilson AD. Interventions for improving modifiable risk factor control in the secondary prevention of stroke. <i>Cochrane Database of Systematic Reviews</i> 2014, Issue 5. Art. No.: CD009103. DOI: 10.1002/14651858.CD009103.                                      | University of Leicester, Department of Health Sciences, Leicester, UK                            | GBR  | 2014                                           | secondary stroke prevention | Prevention             | modifiable risk factor control       | outpatients                      | Outpatient         |
| CSR | 118 | 2013 | update |   | Chen W, Zhang Y, Li X, Yang G, Liu JP. Chinese herbal medicine for diabetic peripheral neuropathy. <i>Cochrane Database of Systematic Reviews</i> 2013, Issue 10. Art. No.: CD007796. DOI: 10.1002/14651858.CD007796.pub3.                                                                                              | Chinese Medicine, Centre for Evidence-Based Chinese Medicine, Beijing, China                     | CHN  | 2013                                           | chinese herbal medicine     | Treatment              | chinese herbs, chinese medicine      | inpatients and outpatients       | Multiple           |
| CSR | 119 | 2011 | update |   | Fede G, Germani G, Gluud C, Gurusamy KS, Burroughs AK. Propylthiouracil for alcoholic liver disease. <i>Cochrane Database of Systematic Reviews</i> 2011, Issue 6. Art. No.: CD002800. DOI: 10.1002/14651858.CD002800.pub3.                                                                                             | Royal Free Hampstead NHS Foundation Trust, Sheila Sherlock Liver Centre, London, UK              | GBR  | 2011                                           | alcoholic liver disease     | Treatment              | Propylthiouracil administration      | outpatients                      | Outpatient         |
| CSR | 120 | 2012 | update |   | Jefferson T, Rivetti A, Di Pietrantonj C, Demicheli V, Ferroni E. Vaccines for preventing influenza in healthy children. <i>Cochrane Database of Systematic Reviews</i> 2012, Issue 8. Art. No.: CD004879. DOI: 10.1002/14651858.CD004879.pub4.                                                                         | The Cochrane Collaboration, Roma, Italy                                                          | ITA  | 2012                                           | influenza prevention        | Prevention             | vaccination                          | outpatients                      | Outpatient         |

Tabelle1

|                                                       |                |        |     |                                                                                                                                                |                                                    |                                                |   |
|-------------------------------------------------------|----------------|--------|-----|------------------------------------------------------------------------------------------------------------------------------------------------|----------------------------------------------------|------------------------------------------------|---|
| adults with past cardiovascular event                 | 2505           | adult  | f/m | institutional: National Institute for Health Research (NIHR) programme grant, institutional: Centre for Clinical Intervention Research,        | none                                               | yes                                            | 0 |
| adults                                                | 390769         | adult  | f/m | institutional: South African Medical Research Council, South Africa., Open institutional: Department of Psychiatry, University of Oxford, UK., | none                                               | previously acted as a temporary consultant for | 0 |
| adolescents antidepressant-induced sexual dysfunction | 1139           | < 19   | f/m | institutional: World Health Organization, Department of HIV/AIDS,                                                                              | none                                               | yes                                            | 0 |
| adults, low- or middle-income country                 | 40309          | adult  | f/m | governmental, institutional: Fondazione I.R.C.C.S. Istituto Neurologico Carlo                                                                  | none                                               | yes                                            | 0 |
| children 0 - 12                                       | 288            | 0 - 12 | f/m | governmental, institutional: Cochrane HIV/AIDS Review Group, USA.                                                                              | none                                               | yes                                            | 0 |
| patients > 13 with NBS diagnosed                      | 0              | > 13   | f/m | institutional: Department of Health Sciences, University of Leicester, UK.                                                                     | has received speaker fees for talks on stroke from | yes                                            | 0 |
| HIV patients with cryptococcal meningitis             | 337            | adult  | f/m | institutional: National Basic Research Program of China, Centre for Evidence-                                                                  | none                                               | yes                                            | 0 |
| patients with ischaemic/hemorrhagic stroke or TIA     | 8021           | adult  | f/m | institutional: The Copenhagen Trial Unit, Denmark., The Danish Medical                                                                         | none                                               | yes                                            | 0 |
| diabetic peripheral neuropathy                        | no restriction |        |     | institutional: REGIONE PIEMONTE ASL 20 ALESSANDRIA,                                                                                            | Jefferson was an ad hoc consultant for             | yes                                            | 0 |
| DPN                                                   | 3639           | s      | f/m |                                                                                                                                                |                                                    |                                                | 0 |
| alcoholic steatosis, fibrosis, hepatitis,             | 710            | adult  | f/m |                                                                                                                                                |                                                    |                                                | 0 |
| healthy children                                      | 300000         | 0 - 16 | f/m |                                                                                                                                                |                                                    |                                                | 0 |

Tabelle1

|                                          |     |             |   |                                                                                                                                                                                                                                                                                                                 |                                                                                                         |     |      |                                                            |                 |                                                 |                               |                    |
|------------------------------------------|-----|-------------|---|-----------------------------------------------------------------------------------------------------------------------------------------------------------------------------------------------------------------------------------------------------------------------------------------------------------------|---------------------------------------------------------------------------------------------------------|-----|------|------------------------------------------------------------|-----------------|-------------------------------------------------|-------------------------------|--------------------|
| CSR                                      | 121 | 2011        | 1 | Akl EA, Oxman AD, Herrin J, Vist GE, Terrenato I, Sperati F, Costiniuk C, Blank D, Schünemann H. Framing of health information messages. <i>Cochrane Database of Systematic Reviews</i> 2011, Issue 12. Art. No.: CD006777. DOI: 10.1002/14651858.CD006777.pub2.                                                | Department of Clinical Epidemiology and Biostatistics, Hamilton, Ontario, Canada                        | CAN | 2011 | framing of health information messages                     | Health Services | negatively/positively framed health messages    | hospital                      | Inpatient/Hospital |
| CSR                                      | 122 | 2011        | 1 | Smart NA, Marshall BJ, Daley M, Boulos E, Windus J, Baker N, Kwok N. Low-fat diets for acquired hypercholesterolaemia. <i>Cochrane Database of Systematic Reviews</i> 2011, Issue 2. Art. No.: CD007957. DOI: 10.1002/14651858.CD007957.pub2.                                                                   | Bond University, Faculty of Health Science and Medicine, Robina, Queensland, Australia                  | AUS | 2011 | acquired hypercholesterolaemia                             | Treatment       | any kind of low-fat diet                        | community setting             | Community          |
| CSR                                      | 123 | 2011        | 1 | Cheuk DKL, Chiang AKS, Lee TL, Chan GCF, Ha SY. Vaccines for prophylaxis of viral infections in patients with hematological malignancies. <i>Cochrane Database of Systematic Reviews</i> 2011, Issue 3. Art. No.: CD006505. DOI: 10.1002/14651858.CD006505.pub2.                                                | Kong, Queen Mary Hospital, Department of Pediatrics and Adolescent Medicine, Hong Kong SAR, China       | CHN | 2011 | viral vaccines in patients with hematological malignancies | Treatment       | viral vaccination                               | hospital                      | Inpatient/Hospital |
| CSR                                      | 124 | 2015 update | 1 | Kwong JSW, Lau HLC, Yeung F, Chau PH. Yoga for secondary prevention of coronary heart disease. <i>Cochrane Database of Systematic Reviews</i> 2015, Issue 7. Art. No.: CD009506. DOI: 10.1002/14651858.CD009506.pub4.                                                                                           | Sichuan University, Chinese Cochrane Center, Chinese Evidence-Based Medicine Center, Chengdu, China     | CHN | 2015 | prevention of coronary heart disease                       | Prevention      | any type of yoga exercises                      | yoga program-setting          | Outpatient         |
| CSR                                      | 125 | 2015        | 1 | Overvest GM, Jacobs W, Vleggeert-Lankamp C, Thomé C, Gunzburg R, Peul W. Effectiveness of posterior decompression techniques compared with conventional laminectomy for lumbar stenosis. <i>Cochrane Database of Systematic Reviews</i> 2015, Issue 3. Art. No.: CD010000. DOI: 10.1002/14651858.CD010000.pub3. | Leiden University Medical Center, Department of Neurosurgery, Leiden, Netherlands                       | NED | 2015 | treatment of lumbar stenosis                               | Treatment       | bilateral laminotomy                            | hospital (surgery)            | Inpatient/Hospital |
| CSR                                      | 126 | 2014 update | 1 | Martí-Carvajal AJ, Knight-Madden JM, Martínez-Zapata MJ. Interventions for treating leg ulcers in people with sickle cell disease. <i>Cochrane Database of Systematic Reviews</i> 2014, Issue 12. Art. No.: CD008394. DOI: 10.1002/14651858.CD008394.pub3.                                                      | Iberoamerican Cochrane Network, Valencia, Venezuela                                                     | VEN | 2014 | leg ulcers in people with sickle cell disease              | Treatment       | any clinical interventions                      | hospital or community setting | Multiple           |
| CSR                                      | 127 | 2014 update | 1 | Junker AE, Als-Nielsen B, Gluud C, Gluud LL. Dopamine agents for hepatic encephalopathy. <i>Cochrane Database of Systematic Reviews</i> 2014, Issue 2. Art. No.: CD003047. DOI: 10.1002/14651858.CD003047.pub3.                                                                                                 | Gentofte Hospital, Department of Medicine F, Hellerup, Denmark                                          | DNK | 2014 | treatment of hepatic encephalopathy                        | Treatment       | dopamine agonists                               | hospital                      | Inpatient/Hospital |
| CSR                                      | 128 | 2013        | 1 | Peckham EJ, Nelson EA, Greenhalgh J, Cooper K, Roberts ER, Agrawal A. Homeopathy for treatment of irritable bowel syndrome. <i>Cochrane Database of Systematic Reviews</i> 2013, Issue 11. Art. No.: CD009710. DOI: 10.1002/14651858.CD009710.pub2.                                                             | University of York, Department of Health Sciences, Heslington, UK                                       | GBR | 2013 | irritable bowel syndrome                                   | Treatment       | homeopathic treatment                           | inpatients and outpatients    | Multiple           |
| CSR                                      | 129 | 2013        | 1 | Okwundu CI, Nagpal S, Musekiwa A, Sinclair D. Home- or community-based programmes for treating malaria. <i>Cochrane Database of Systematic Reviews</i> 2013, Issue 5. Art. No.: CD009527. DOI: 10.1002/14651858.CD009527.pub2.                                                                                  | Centre for Evidence-based Health Care, Faculty of Medicine and Health Sciences, Tygerberg, South Africa | ZAF | 2013 | malaria treating programmes                                | Treatment       | Home- or community-based programmes             | home or community setting     | Multiple           |
| CSR                                      | 130 | 2013        | 1 | Rahimi-Movaghgar A, Amin-Esmaeili M, Hefazi M, Yousefi-Nooraie R. Pharmacological therapies for maintenance treatments of opium dependence. <i>Cochrane Database of Systematic Reviews</i> 2013, Issue 1. Art. No.: CD007775. DOI: 10.1002/14651858.CD007775.pub2.                                              | for HIV/AIDS (IRCHA), Tehran University of Medical Sciences, Department for Mental Health, Tehran, Iran | IRN | 2013 | opium dependence                                           | Treatment       | any pharmacological therapies                   | outpatients                   | Outpatient         |
| <b>Systematic reviews (non-Cochrane)</b> |     |             |   |                                                                                                                                                                                                                                                                                                                 |                                                                                                         |     |      |                                                            |                 |                                                 |                               |                    |
| SR                                       | 131 | 2015        | 1 | Rush CJ, Campbell RT, Jhund PS, et al. Falling cardiovascular mortality in heart failure with reduced ejection fraction and implications for clinical trials. <i>JACC Heart Fail.</i> 2015;3(8):603-14.                                                                                                         | Hairmyres Hospital, East Kilbride, Scotland, United Kingdom                                             | GBR | 2015 | heart failure mortality                                    | Treatment       | disease-modifying therapies, esp. beta-blockers | outpatients and inpatients    | Multiple           |

Tabelle1

|                                                                                                                                                                              |        |       |     |                                                                                                                                                                                                                                                                                                                                                      |                                                       |                |   |   |
|------------------------------------------------------------------------------------------------------------------------------------------------------------------------------|--------|-------|-----|------------------------------------------------------------------------------------------------------------------------------------------------------------------------------------------------------------------------------------------------------------------------------------------------------------------------------------------------------|-------------------------------------------------------|----------------|---|---|
| consumers, health professionals, policy acquired (not familial) hypercholesterolaemia patients with hematological malignancies adults with diagnosis of acute or chronic CHD | 16342  | adult | f/m | institutional: State University of New York at Buffalo, NY, USA., Italian National institutional: Primary Healthcare Research Education and Development institutional: The University of Hong Kong, Hong Kong, Cochrane institutional: The Chinese University of Hong Kong, Hong Kong.                                                               | review authors were also authors of one               | yes            | 0 |   |
| patients with lumbar stenosis                                                                                                                                                | 733    | adult | f/m | governmental, institutional: Leiden University Medical Center, Netherlands.                                                                                                                                                                                                                                                                          | none                                                  | yes            | 0 |   |
| adults with sickle cell disease                                                                                                                                              | 198    | adult | f/m | institutional: Iberoamerican Cochrane Center, Spain., Cystic institutional: Copenhagen Trial Unit, Denmark., The 1991 Pharmacy institutional: University of Leeds, UK., Homeopathy Research Institute, institutional: Centre for Evidence-Based Health Care, Stellenbosch, governmental, institutional: Tehran University of Medical Sciences, Iran. | Carvajal was employed by Eli Lilly to run a four-hour | yes            | 1 |   |
| patients with hepatic encephalopathy                                                                                                                                         | 144    | adult | f/m | institutional: University of Leeds, UK., Homeopathy Research Institute, institutional: Centre for Evidence-Based Health Care, Stellenbosch, governmental, institutional: Tehran University of Medical Sciences, Iran.                                                                                                                                | none                                                  | yes            | 0 |   |
| patients with irritable bowel syndrome and adults with fever or malaria symptoms                                                                                             | 213    | adult | f/m | institutional: Centre for Evidence-Based Health Care, Stellenbosch, governmental, institutional: Tehran University of Medical Sciences, Iran.                                                                                                                                                                                                        | contributed to the design and management              | yes            | 0 |   |
| opium dependant adults                                                                                                                                                       | 870    | adult | f/m | institutional: Tehran University of Medical Sciences, Iran.                                                                                                                                                                                                                                                                                          | none                                                  | yes            | 0 |   |
| patients with chronic heart failure                                                                                                                                          | 136182 | adult | f/m | institutional: universities, British Heart Foundation Project Grant,                                                                                                                                                                                                                                                                                 | not mentioned                                         | none mentioned | 0 | 0 |

Tabelle1

|    |     |      |   |                                                                                                                                                                                                                                                                                                                                                                                                                                                                                                |                                                                                                                                                                                  |     |      |                                        |                 |                                                      |                               |                    |
|----|-----|------|---|------------------------------------------------------------------------------------------------------------------------------------------------------------------------------------------------------------------------------------------------------------------------------------------------------------------------------------------------------------------------------------------------------------------------------------------------------------------------------------------------|----------------------------------------------------------------------------------------------------------------------------------------------------------------------------------|-----|------|----------------------------------------|-----------------|------------------------------------------------------|-------------------------------|--------------------|
| SR | 132 | 2015 | 1 | <p>Foersch M, Jacobs C, Wriedt S, Hechtner M, Wehrbein H. Effectiveness of maxillary protraction using facemask with or without maxillary expansion: a systematic review and meta-analysis. <i>Clinical Oral Investigations</i> [serial online]. July 2015;19(6):1181-119</p>                                                                                                                                                                                                                  | and Dentofacial Orthopedics, Johannes Gutenberg-University Mainz Medical Center, Analysis, and Library Services, Center for Surveillance, Epidemiology, and Laboratory Services, | DEU | 2015 | deficient maxilla and reverse overbite | Treatment       | maxillary protraction with face mask therapy         | home setting                  | Home               |
| SR | 133 | 2015 | 1 | <p>Sipe TA, Finnie RKC, Knopf JA, et al. Effects of mental health benefits legislation: A Community Guide systematic review. <i>Am J Prev Med.</i> 2015;48(6):755–766.</p>                                                                                                                                                                                                                                                                                                                     |                                                                                                                                                                                  | USA | 2015 | mental health                          | Health Services | Health insurance benefits for mental health services | outpatients                   | Outpatient         |
| SR | 134 | 2013 | 1 | <p>A.A. Ahmed, E. Alsharief, A. Alsharief, Intensive versus conventional glycemic control: what is best for patients with type 2 diabetes? <i>Diabetes Metab Syndr,</i> 7 (2013), pp. 48–51</p>                                                                                                                                                                                                                                                                                                | Cardiff University, UK School of Psychological Sciences, University of Manchester, United Kingdom                                                                                | GBR | 2013 | Type 2 Diabetes                        | Treatment       | intensive and conventional insulin therapy           | home setting                  | Home               |
| SR | 135 | 2012 | 1 | <p>M. Panagioti, P.A. Gooding, N. Tarrow A meta-analysis of the association between posttraumatic stress disorder and suicidality: the role of comorbid depression; <i>Compr. Psychiatry,</i> 53 (2012), pp. 915–930</p>                                                                                                                                                                                                                                                                       | School of Medicine, University of Queensland, Brisbane, Queensland, Australia                                                                                                    | GBR | 2012 | posttraumatic stress disorder          | community-based | measuring frequency of suicidality                   | outpatients                   | Outpatient         |
| SR | 136 | 2015 | 1 | <p>Z. Wang Age-dependent decline of association between obesity and mortality: a systematic review and meta-analysis <i>Obes Res Clin Pract,</i> 9 (2015), pp. 1–11</p>                                                                                                                                                                                                                                                                                                                        | School of Music, 100 Ferguson Hall, 2106 4th Street South, Minneapolis, MN 55455, USA                                                                                            | AUS | 2015 | obesity–mortality association          | community-based | assessing effect of obesity on mortality             | community setting             | Community          |
| SR | 137 | 2015 | 1 | <p>E. Rolka A systematic review of music and dyslexia, <i>The Arts in Psychotherapy,</i> 46 (2015), pp 24-32</p>                                                                                                                                                                                                                                                                                                                                                                               |                                                                                                                                                                                  | USA | 2015 | dyslexia                               | Treatment       | music interventions                                  | therapy setting               | Outpatient         |
| SR | 138 | 2011 | 1 | <p>Wu S, Cohen D, Shi Y, Pearson M, Sturm R. Economic analysis of physical activity interventions. <i>Am J Prev Med.</i> 2011;40(2):149–58.</p>                                                                                                                                                                                                                                                                                                                                                | RAND Corporation, Santa Monica, California                                                                                                                                       | USA | 2011 | physical activity                      | Prevention      | interventions promoting physical activity            | school and community setting  | Community          |
| SR | 139 | 2012 | 1 | <p>Rodgers M, Asaria M, Walker S, McMillan D, Lucock M, Harden M, et al.The clinical effectiveness and cost-effectiveness of low-intensity psychological interventions for the secondary prevention of relapse after depression: a systematic review. <i>Health Technol Treat Aromatase Inhibitor–Related Arthralgia in Breast Cancer: A Systematic Review and Meta-Analysis.</i> <i>Journal of Alternative and Complementary Medicine.</i> 2015;21(5):251-260. doi:10.1089/acm.2014.0083.</p> | Centre for Reviews and Dissemination, University of York, York, UK                                                                                                               | GBR | 2012 | secondary prevention of depression     | Prevention      | low- intensity psychological interventions           | inpatients and outpatients    | Multiple           |
| SR | 140 | 2015 | 1 | <p>Int J Integr Care 2013; Jul–Sep; URN:NBN:NL:UI:10-1-114740 , Community services' involvement in the discharge of older adults from hospital into the community, Comparison of labor and delivery care provided by certified nurse-midwives and physicians: a systematic review, 1990 to 2008. <i>Women's Health Issues Off Publ Jacobs Inst Womens Health.</i> 2012;22:e73–e81. doi: 10.1016/j.whi.2011.06.005.</p>                                                                         | Institute of Traditional Medicine, National Yang-Ming University, Taipei, Taiwan.                                                                                                | TWN | 2015 | arthralgia in breast cancer patients   | Treatment       | acupuncture                                          | therapy setting (acupuncture) | Outpatient         |
| SR | 141 | 2013 | 1 | <p>Division of Health Sciences, University of South Australia, Adelaide, Australia</p>                                                                                                                                                                                                                                                                                                                                                                                                         |                                                                                                                                                                                  | AUS | 2013 | discharge procedure                    | Health Services | community services                                   | community setting             | Community          |
| SR | 142 | 2012 | 1 | <p>C., Soulié, A6:1134 (2015). [Management of low-risk prostate cancer]. <i>Progrès En Urologie : Journal de l'Association Française d'urologie et de La Société Française d'urologie,</i> 25(1), 1–10. <a href="https://doi.org/10.1016/j.purol.2014.10.007">https://doi.org/10.1016/j.purol.2014.10.007</a></p>                                                                                                                                                                              | University of Maryland School of Nursing, Baltimore, USA                                                                                                                         | USA | 2012 | Labor and Delivery Care                | Treatment       | labor and delivery care                              | birth setting                 | Inpatient/Hospital |
| SR | 143 | 2015 | 1 | <p>Université Paris Descartes, institut Montsouris, 42, boulevard Jourdan, 75014 Paris, France</p>                                                                                                                                                                                                                                                                                                                                                                                             |                                                                                                                                                                                  | FRA | 2015 | low-risk prostate cancer               | Treatment       | different treatments                                 | inpatients and outpatients    | Multiple           |

Tabelle1

|                                                                        |               |                 |     |                                                                                        |               |                     |   |   |
|------------------------------------------------------------------------|---------------|-----------------|-----|----------------------------------------------------------------------------------------|---------------|---------------------|---|---|
| patients treated with face mask covered by private or public insurance | 936           | adult           | f/m | governmental, institutional                                                            | none          | yes                 | 0 | 1 |
| patients with type 2 diabetes diagnosed with posttraumatic stress      | 23182         | adult           | f/m | governmental, institutional                                                            | none          | yes (not mentioned) | 0 | 0 |
| individuals with BMI > 30                                              | 4650877       | adult           | f/m | governmental, institutional: National Health and Medical Research Council of Australia | not mentioned | none                | 0 | 1 |
| patients suffering from dyslexia                                       | 2726          | 6 to 36         | f/m | governmental, institutional                                                            | not mentioned | no                  | 0 | 1 |
| Population adults receiving treatment for depression                   | not mentioned | no restrictions | f/m | governmental, institutional: National Cancer research institute, UK                    | not mentioned | none                | 0 | 1 |
| women with breast cancer stages I - III                                | 207           | adult           | f   | governmental, institutional                                                            | none          | yes                 | 0 | 0 |
| patients > 65 discharged from hospital                                 | 8440          | > 65            | f/m | governmental, institutional                                                            | not mentioned | none                | 0 | 0 |
| pregnant women                                                         | 2836410       | no restrictions | f   | institutional, supported by Tri-Council for Nursing and the Advanced                   | not mentioned | none                | 0 | 0 |
| patients with low-risk prostate cancer                                 | not mentioned | adult           | m   | governmental, institutional                                                            | none          | none                | 0 | 1 |



Tabelle1

|    |     |      |   |                                                                                                                                                                                                                                                                                                       |                                                                                                           |     |      |                                                  |                 |                                          |                                |                  |
|----|-----|------|---|-------------------------------------------------------------------------------------------------------------------------------------------------------------------------------------------------------------------------------------------------------------------------------------------------------|-----------------------------------------------------------------------------------------------------------|-----|------|--------------------------------------------------|-----------------|------------------------------------------|--------------------------------|------------------|
| SR | 144 | 2014 | 1 | Maglione, Margaret A.; Das, Lopamudra; Raaen, Laura; et al. Safety of Vaccines Used for Routine Immunization of US Children: A Systematic Review PEDIATRICS Volume: 134 Issue: 2 Pages: 325-337 Published: AUG 2014 DOI <a href="http://dx.doi.org/10.1542/peds">http://dx.doi.org/10.1542/peds</a> . | RAND Corporation, Santa Monica, California;                                                               | USA | 2014 | vaccination                                      | Treatment       | assessing safety and adverse effects     | outpatients                    | Outpatient       |
| SR | 145 | 2014 | 1 | Albrecht B, Staiger PK, Hall K, et al. (2014) Benzodiazepine use and aggressive behaviour: A systematic review. Australian and New Zealand Journal of Psychiatry 48: 1096–1114. doi: 10.1177/0004867414548902                                                                                         | School of Psychology, Deakin University, Melbourne, Australia                                             | AUS | 2014 | benzodiazepines                                  | Treatment       | benzodiazepine consumption               | community and hospital setting | Multiple         |
| SR | 146 | 2012 | 1 | Te Morenga Lisa, Mallard Simonette, Mann Jim. Dietary sugars and body weight: systematic review and meta-analyses of randomised controlled trials and cohort studies BMJ 2013; 346 :e7492 doi: <a href="http://dx.doi.org/10.1136/bmj.e7492">http://dx.doi.org/10.1136/bmj.e7492</a>                  | Nutrition and Medicine, University of Otago, PO Box 56, Dunedin 9054, New Zealand                         | NZL | 2012 | association between dietary sugar and bodyweight | community-based | ad libitum diets                         | community setting              | Community        |
| SR | 147 | 2014 | 1 | Pierre M. J. Zelissen & Frank J. G. Backx (2014) Impact of Overt and Subclinical Hypothyroidism on Exercise Tolerance: A Systematic Review, Research Quarterly for Exercise and Sport, 85:3, 365-389, DOI: 10.1080/02701367.2014.930405                                                               | Rehabilitation, Nursing Science and Sport, University Medical Center Utrecht                              | NED | 2014 | primary hypothyreosis                            | community-based | exercise                                 | outpatients                    | Outpatient       |
| SR | 148 | 2013 | 1 | Vanessa Siffredi , Vicki Anderson , Richard J. Leventer & Megan M. Spencer- Smith (2013) Neuropsychological Profile of Agenesis of the Corpus Callosum: A Systematic Review, Developmental Neuropsychology, 38:1, 36-57, DOI: 10.1080/87565641.2012.721421                                            | Murdoch Childrens Research Institute , Melbourne , Australia                                              | AUS | 2013 | Agenesis of Corpus Callosum                      | community-based | measuring of IQ (quantitative)           | laboratory setting             | different/ other |
| SR | 149 | 2015 | 1 | Llewellyn, A., Simmonds, M., Owen, C. G., and Woolacott, N. (2015) Childhood obesity as a predictor of morbidity in adulthood: a systematic review and meta-analysis. Obes Rev, 17: 56–67. doi: 10.1111/obr.12316.                                                                                    | Centre for Reviews and Dissemination, University of York, York, UK                                        | GBR | 2015 | childhood obesity                                | community-based | assessing effect of obesity on mortality | community setting              | Community        |
| SR | 150 | 2014 | 1 | Matsuda, A., Yamaoka, K., Tango, T., Matsuda, T., Nishimoto, H. (2014). Effectiveness of psychoeducational support on quality of life in early-stage breast cancer patients: A systematic review and meta-analysis of randomized controlled trials. Qual Life R                                       | Center for Cancer Control and Information Services, National Cancer Center, 5-1-1 Tsukiji, Chuo-ku, Tokyo | JPN | 2014 | breast cancer                                    | Treatment       | psychoeducational support                | psychotherapy setting          | Outpatient       |
| SR | 151 | 2013 | 1 | A. Bak, J. Browne, H. P. Loveday and A. Tsiami (2013). Systematic review of nutritional interventions to prevent healthcare-associated infections in undernourished elderly. Proceedings of the Nutrition Society, 72, E212 doi:10.1017/S0029665113002371.                                            | Joanna Briggs Institute Collaboration Centre, University of West London, Brentford TW8 9GA, UK            | GBR | 2013 | undernourishment of older people                 | Treatment       | nutritional interventions                | healthcare setting             | different/other  |
| SR | 152 | 2014 | 1 | L. Bourke, K. E. Homer, M. A. Thaha, L. Steed, D. J. Rosario, K. A. Robb, J. M. Saxton and S. J. C. Taylor Interventions to improve exercise behaviour in sedentary people living with and beyond cancer: A systematic review British Journal of Cancer (2014)                                        | School of Medicine and Dentistry, Blizard Institute,                                                      | GBR | 2014 | cancer and exercise                              | Treatment       | improving exercise behaviour             | community setting              | Community        |
| SR | 153 | 2013 | 1 | Library of Systematic Reviews, [S.I.], v. 8, n. 16 Suppl, p. S34 - 45, jul. 2010. ISSN 1838-2142. <a href="http://www.joannabriggslibrary.org/jbillibrary/index.php/jbisrir/article/view/571/">http://www.joannabriggslibrary.org/jbillibrary/index.php/jbisrir/article/view/571/</a>                 | School of Health Sciences, Faculty of Health, University of Newcastle.                                    | GBR | 2013 | childhood obesity                                | Prevention      | parent-centered interventions            | community , family setting     | Community        |
| SR | 154 | 2014 | 1 | peptidase-4 inhibitors versus intermediate-acting insulin or placebo for patients with type 2 diabetes failing two oral antihyperglycaemic agents: a systematic review and network meta-analysis. BMJ Open 2014;4:e005752. doi:10.1136/bmjopen-2014-005752                                            | Li Ka Shing Knowledge Institute, St. Michael's Hospital, Toronto, Ontario, Canada.                        | CAN | 2014 | DPP-4 inhibitors in type 2 diabetes              | Treatment       | DPP-4 inhibitors/therapy                 | Home setting                   | Home             |
| SR | 155 | 2012 | 1 | Agarwal R, Goldenberg M, Perry R, Ishak WW. The Quality of Life of Adults with Attention Deficit Hyperactivity Disorder: A Systematic Review. Innovations in Clinical Neuroscience. 2012;9(5-6):10-21.                                                                                                | Brookdale University Hospital, Brooklyn, New York                                                         | USA | 2012 | quality of life in ADHD patients                 | community-based | quality of life measurement              | community setting              | community        |

Tabelle1

|                                                                                                 |                      |                        |     |                                                                                                 |                                                         |                            |   |   |
|-------------------------------------------------------------------------------------------------|----------------------|------------------------|-----|-------------------------------------------------------------------------------------------------|---------------------------------------------------------|----------------------------|---|---|
| children                                                                                        | not<br>mention<br>ed | children               | f/m | institutional: Agency<br>for Healthcare<br>Research and<br>Quality, US                          | none                                                    | yes (not<br>mentione<br>d) | 1 | 1 |
| adults                                                                                          | 74536                | adult                  | f/m | governmental,<br>institutional                                                                  | has received<br>speaking<br>honorarium<br>from          | yes (not<br>mentione<br>d) | 1 | 1 |
| Population<br>patients with<br>primary<br>hypothyreosi<br>s                                     | 517844               | no<br>restriction<br>s | f/m | institutional:<br>University of Otago<br>and the Riddet<br>Institute, a New                     | the University<br>of Otago,<br>Riddet<br>Institute, and | yes                        | 1 | 1 |
| with<br>diagnosed<br>agenesis of<br>Corpus                                                      | 1379                 | 16 - 80                | f/m | governmental,<br>institutional                                                                  | not<br>mentioned                                        | none<br>mentione<br>d      | 0 | 1 |
|                                                                                                 | 110                  | 0 - 73                 | f/m | institutional: Victorian<br>Government's<br>Operational<br>Infrastructure                       | not<br>mentioned                                        | none<br>mentione<br>d      | 0 | 0 |
| children and<br>adolescents                                                                     | 4648420              | 0 - 18                 | f/m | governmental,<br>institutional: NIHR<br>HTA Programme,                                          | none                                                    | yes                        | 0 | 1 |
| early- stage<br>breast<br>cancer<br>patients<br>(some<br>undernourish<br>ed, some<br>well       | 1159                 | adult                  | f   | institutional: Ministry<br>of Education, Culture,<br>Sports, Science and<br>Technology in Japan | not<br>mentioned                                        | none<br>mentione<br>d      | 0 | 1 |
| people with<br>primary<br>cancer<br>diagnosis<br>school,<br>primary and<br>secondary<br>school) | 2485                 | > 59                   | m/f | governmental,<br>institutional                                                                  | not<br>mentioned                                        | yes (not<br>mentione<br>d) | 0 | 0 |
|                                                                                                 | 648                  | adult                  | m/f | governmental,<br>institutional                                                                  | not<br>mentioned                                        | yes (not<br>mentione<br>d) | 0 | 1 |
| patients with<br>type 2<br>diabetes                                                             | 2967                 | adult                  | m/f | institutional:<br>Canadian Institutes<br>for Health<br>Research/Drug                            | none                                                    | yes                        | 1 | 1 |
| no restriction                                                                                  | 18933                | no<br>restriction<br>s | m/f | governmental,<br>institutional                                                                  | none                                                    | no                         | 0 | 0 |

Tabelle1

|    |     |      |   |                                                                                                                                                                                                                                                                                                                    |                                                                                                                                                                                               |     |      |                      |                 |                                                 |                            |            |
|----|-----|------|---|--------------------------------------------------------------------------------------------------------------------------------------------------------------------------------------------------------------------------------------------------------------------------------------------------------------------|-----------------------------------------------------------------------------------------------------------------------------------------------------------------------------------------------|-----|------|----------------------|-----------------|-------------------------------------------------|----------------------------|------------|
| SR | 156 | 2013 | 1 | Ian C. Scott, Rachael Tan, Daniel Stahl, Sophia Steer, Cathryn M. Lewis, and Andrew P. Cope The protective effect of alcohol on developing rheumatoid arthritis: a systematic review and meta-analysis Rheumatology (2013) 52 (5): 856-867 first published online 15 October 2013. doi:10.1093/rheumatology/ket311 | Cellular Biology of Inflammation, Department of Medical and Molecular Genetics, Guy's Hospital, Huashan Hospital, Fudan University, No.12 Wulumuqi Road, Shanghai, 200040, China              | GBR | 2013 | rheumatoid arthritis | community-based | alcohol intake                                  | community setting          | Community  |
| SR | 157 | 2014 | 1 | Hu MB, Xu H, Bai PD, et al. Obesity has multifaceted impact on biochemical recurrence of prostate cancer: a dose-response meta-analysis of 36,927 patients. Med Oncol 2014; 31:829. DOI: 10.1007/s12032-013-0829-8                                                                                                 | College of Medicine, University of Illinois at Chicago, Chicago, Illinois                                                                                                                     | CHN | 2014 | prostate cancer      | Prevention      | assessing effect of obesity (BMI) on recurrence | clinical setting           | Outpatient |
| SR | 158 | 2014 | 1 | Blasco, M.A., Redleaf, M.I., 2014. Cochlear implantation in unilateral sudden deafness improves tinnitus and speech comprehension: meta-analysis and systematic review. Otol. Neurotol. 35 (8), 1426-1432. DOI: 10.1097/MAO.0000000000000431                                                                       | College of Medicine, University of Illinois at Chicago, Chicago, Illinois                                                                                                                     | USA | 2014 | cochlear implants    | Treatment       | hearing loss                                    | outpatients                | Outpatient |
| SR | 159 | 2014 | 1 | Physical Activity in Overweight and Obese Adolescents: Systematic Review of the Effects on Physical Fitness Components and Cardiovascular Risk Factors SPORTS MEDICINE Volume: 44 Issue: 8 Pages: 1139-1152 Published: AUG 2014                                                                                    | Janeiro, Lab Phys Act & Hlth Promot, Inst Phys Educ & Sports, BR-20550013 Rio De Janeiro, Division of Mental Health and Wellbeing, Warwick Medical School, University of Warwick, CV4 7AL, UK | BRA | 2014 | obesity prevention   | Prevention      | physical activity                               | community, therapy setting | Multiple   |
| SR | 160 | 2015 | 1 | Gibbs et al., 2014, M. Gibbs, C. Winsper, S. Marwaha, E. Gilbert, M. Broome, S.P. Singh, Cannabis use and mania symptoms: a systematic review and meta-analysis J. Affect. Disord., 171C (2014), pp. 39–47, doi:10.1016/j.jad.2014.09.016                                                                          | Division of Mental Health and Wellbeing, Warwick Medical School, University of Warwick, CV4 7AL, UK                                                                                           | GBR | 2015 | cannabis use         | community-based | cannabis use and association with mania         | community setting          | Community  |

## Rapid reviews

Tabelle1

|                                                                     |       |         |     |                                                                           |                                             |                     |   |   |
|---------------------------------------------------------------------|-------|---------|-----|---------------------------------------------------------------------------|---------------------------------------------|---------------------|---|---|
| drinkers/non-drinkers                                               | 96462 | adult   | m/f | governmental, institutional: Arthritis Research UK                        | undertaking a clinical research fellowship, | none mentioned      | 0 | 0 |
| patients with primary prostate cancer                               | 36927 | adult   | m   | governmental, institutional: National Natural Science Foundation of China | none                                        | none mentioned      | 0 | 0 |
| patients with unilateral hearing loss                               | 36    | adult   | m/f | governmental, institutional                                               | none                                        | none mentioned      | 0 | 0 |
| overweight and obese adolescents who had experienced mania symptoms | 1616  | 12 - 17 | m/f | institutional: Carlos Chagas Filho Foundation for the Research Support in | none                                        | none mentioned      | 0 | 1 |
|                                                                     | 2391  | > 12    | m/f | governmental, institutional                                               | none                                        | yes (not mentioned) | 0 | 1 |

Tabelle1

|    |     |             |   |                                                                                                                                                                                                                                                                                                                                                                  |                                                                                                                                             |     |      |                                                                      |                                                |                               |                    |
|----|-----|-------------|---|------------------------------------------------------------------------------------------------------------------------------------------------------------------------------------------------------------------------------------------------------------------------------------------------------------------------------------------------------------------|---------------------------------------------------------------------------------------------------------------------------------------------|-----|------|----------------------------------------------------------------------|------------------------------------------------|-------------------------------|--------------------|
| RR | 161 | 2015        | 1 | Sedation and Anesthesia Options for Diagnostic Procedures: A Review of Clinical Effectiveness and Guidelines<br>Menear M, Briand C. Implementing a continuum of evidence-based psychosocial interventions for people with severe mental illness: part 1- review of major initiatives and implementation strategies. <i>Can J Psychiatry</i> (2014) 59(4):178–86. | Canadian Agency for Drugs and Technologies in Health Preventive Medicine, School of Public Health, University of Montreal, Montreal, Quebec | CAN | 2015 | sedation/anesthesia<br>Treatment                                     | Sedation and anesthesia options                | anesthesia setting hospital   | Inpatient/Hospital |
| RR | 162 | 2014        | 1 | Saeed S, Golfam M, Beall RF, Ashbury FD, Palmer LJ, Little J. Effectiveness of individual-focused interventions to prevent chronic disease. <i>Eur J Clin Invest</i> 2014;44:883–91.                                                                                                                                                                             | Department of Epidemiology and Community Medicine, University of Ottawa, Ottawa, ON, Canada                                                 | CAN | 2014 | prevention of chronic disease<br>Prevention                          | different psychological interventions          | mental health service setting | Inpatient/Hospital |
| RR | 163 | 2014        | 1 | Sara A Kreindler, Yang Cui, Colleen J Metge, Melissa Raynard, Patient characteristics associated with longer emergency department stay: a rapid review, <i>Emerg Med J</i> 2016;33:3 194-199 Published Online First: 4 September 2015 doi:10.1136/emmermed-2015-204913                                                                                           | Department of Community Health Sciences, University of Manitoba, Winnipeg, Manitoba, Canada                                                 | CAN | 2015 | length of emergency department stay<br>Health Services               | assessing length of stay                       | emergency department          | Inpatient/Hospital |
| RR | 164 | 2015 update | 1 | Chetan R Trivedy, Matthew W Cooke, Unscheduled return visits (URV) in adults to the emergency department (ED): a rapid evidence assessment policy review, <i>Emerg Med J</i> 2015;32:4 324-329 Published Online First: 28 October 2013 doi:10.1136/emmermed-2013-202719                                                                                          | <i>Division of Health Sciences, Warwick Medical School, Coventry, UK</i>                                                                    | GBR | 2015 | unscheduled return visits to emergency department<br>Health Services | assessing reasons for URVs                     | emergency department          | Inpatient/Hospital |
| RR | 165 | 2015        | 1 | J. Yu, Y. Wang, Y. Li, X. Li, C. Li, J.T. Shen, PHP74 - The DA Vinci Surgical System: A Rapid Review of the Clinical and Economic Evidence, <i>Value in Health, Volume 17, Issue 7, November 2014, Page A798, ISSN 1098-3015, http://dx.doi.org/10.1016/j.jval.2014.08.476.</i>                                                                                  | West China Hospital, Sichuan University, Chengdu, China                                                                                     | CHN | 2014 | Da Vinci Surgical System<br>Treatment                                | using DVSS for surgical procedures             | hospital, surgery             | Inpatient/Hospital |
| RR | 166 | 2014        | 1 | Lal S, Adair CE. E-mental health: a rapid review of the literature. <i>Psychiatr Serv.</i> 2014;65:24–32.                                                                                                                                                                                                                                                        | McGill University Institute / Douglas Mental Health University Institute, Montreal, Quebec, Canada                                          | CAN | 2014 | e-mental health<br>Health Services                                   | different types of e-mental health initiatives | e-health setting              | different/other    |
| RR | 167 | 2014        | 1 | Beall RF, Baskerville N, Golfam M, Saeed S, Little J. Modes of delivery in prevention intervention studies: a rapid review. <i>Eur J Clin Invest</i> 2014;44:688–96. DOI: 10.1111/eci.12279                                                                                                                                                                      | Epidemiology and Community Medicine, University of Ottawa, Ottawa, ON, Canada                                                               | CAN | 2014 | promoting primary prevention<br>Prevention                           | promoting physical activity, diet etc          | community setting             | Community          |
| RR | 168 | 2014        | 1 | Jiwa, M., McManus, A., and Dadich, A. (2013) Continuity of cancer care: Where do primary care practitioners fit in? <i>Cancer Forum</i> , 37(1): 31-34.                                                                                                                                                                                                          | Curtin Health Innovation Research Institute, Curtin University, Perth Western Australia.                                                    | AUS | 2013 | primary cancer care<br>Treatment                                     | cancer care                                    | outpatients (primary care)    | outpatient         |
| RR | 169 | 2013        | 1 | Movement Therapies for the Self-Management of Chronic Pain Symptoms, Courtney Lee, Cindy Crawford, Eric Schoomaker, <i>Active Self-Care Therapies for Pain (PACT) Working Group, Pain Medicine</i> Apr 2014, 15 (S1) S40-S53; DOI: 10.1111/pme.12411                                                                                                             | Samueli Institute, Alexandria, Virginia, USA                                                                                                | USA | 2014 | chronic pain management<br>Treatment                                 | movement therapy                               | therapy setting               | Outpatient         |
| RR | 170 | 2014        | 1 | Boyce T, Holmes A (2012) Addressing Health Inequalities in the Delivery of the Human Papillomavirus Vaccination Programme: Examining the Role of the School Nurse. <i>PLoS ONE</i> 7(9): e43416. doi:10.1371/journal.pone.0043416                                                                                                                                | Department of Medicine, Imperial College London, Hammersmith Hospital,                                                                      | GBR | 2012 | HPV immunisation<br>Treatment                                        | HPV vaccination                                | "school nurse" setting        | Community          |
| RR | 171 | 2012        | 1 | experience of community engagement for individuals: a rapid review of evidence. <i>Health &amp; Social Care In The Community</i> [serial online]. May 2011;19(3):250-260. Available from: MEDLINE, Ipswich, MA. doi: 10.1111/j.1365-2524.2010.00976.x                                                                                                            | Division of Health Research, School of Health and Medicine, Lancaster University                                                            | GBR | 2011 | community engagement<br>Prevention                                   | different forms of community engagement        | community setting             | Community          |
| RR | 172 | 2011        | 1 |                                                                                                                                                                                                                                                                                                                                                                  |                                                                                                                                             |     |      |                                                                      |                                                |                               |                    |

Tabelle1

|                                                                          |               |                |     |                                                                                            |                                                 |                     |   |
|--------------------------------------------------------------------------|---------------|----------------|-----|--------------------------------------------------------------------------------------------|-------------------------------------------------|---------------------|---|
| Anesthesia patients of all ages                                          | 3538          | no restriction | m/f | governmental, institutional                                                                | not mentioned                                   | no protocol         | 1 |
| adults with severe mental illness SMI                                    | not mentioned | adult          | m/f | governmental, institutional: Canadian Psychiatric Association                              | none                                            | no protocol         | 0 |
| adults                                                                   | not mentioned | adult          | m/f | institutional: Cancer Care Ontario, Ministry of Health and Long-Term Care                  | not mentioned                                   | none mentioned      | 1 |
| patients in emergency department repeatedly visiting ED within 48 or 72h | > 1700000     | no restriction | m/f | governmental, institutional                                                                | none                                            | yes                 | 1 |
| patients undergoing surgery receiving mental health services             | not mentioned | no restriction | m/f | governmental, institutional                                                                | none                                            | none mentioned      | 0 |
| Population                                                               | not mentioned | no restriction | m/f | governmental, institutional: Cancer Care Ontario, Ministry of Health and Long-Term Care    | not mentioned                                   | yes                 | 0 |
| Patients with cancer                                                     | not mentioned | no restriction | m/f | governmental, institutional: Cancer Institute NSW                                          | not mentioned                                   | yes (not mentioned) | 0 |
| patients with chronic pain symptoms                                      | 2418          | adult          | m/f | governmental, institutional                                                                | none                                            | yes (not mentioned) | 1 |
| adolescent girls                                                         | 16744         | adolescent     | f   | institutional; National Institute for Health Research (NIHR), UK Clinical Research Society | the authors of The Marmot Review's Fair Society | none mentioned      |   |
| Population                                                               | not mentioned | no restriction | m/f | institutional: National Institute for Health and Clinical Excellence (NICE),               | none                                            | none mentioned      | 0 |

Tabelle1

|    |     |      |   |                                                                                                                                                                                                                                                                                                   |                                                                                                                                                                                          |     |      |                                                       |                 |                                                        |                                     |                    |
|----|-----|------|---|---------------------------------------------------------------------------------------------------------------------------------------------------------------------------------------------------------------------------------------------------------------------------------------------------|------------------------------------------------------------------------------------------------------------------------------------------------------------------------------------------|-----|------|-------------------------------------------------------|-----------------|--------------------------------------------------------|-------------------------------------|--------------------|
| RR | 173 | 2014 | 1 | Sensory Art Therapies for the Self-Management of Chronic Pain Symptoms, Cindy Crawford, Courtney Lee, John Bingham, Active Self-Care Therapies for Pain (PACT) Working Group, Pain Medicine Apr 2014, 15 (S1) S66-S75; DOI: 10.1111/pme.12409                                                     | Samueli Institute, Alexandria, Virginia, USA                                                                                                                                             | USA | 2014 | chronic pain management                               | Treatment       | sensory art & music therapies                          | therapy setting                     | Outpatient         |
| RR | 174 | 2013 | 1 | Ndumbe-Eyoh S, Moffatt H. Intersectoral action for health equity: a rapid systematic review. BMC Public Health. 2013;13:1056-2458-13-1056. DOI: 10.1186/1471-2458-13-1056                                                                                                                         | Centre for Determinants of Health, P.O.Box 5000, Antigonish NS B2G 2 W5, Canada                                                                                                          | CAN | 2013 | health equity                                         | Health Services | Any intersectoral intervention involving public health | community and school setting        | Community          |
| RR | 175 | 2014 | 1 | Brunton, G., Paraskeva, N., Caird, J., Bird, K. S., Kavanagh, J., Kwan, I., & ... Thomas, J. (2014). Psychosocial predictors, assessment, and outcomes of cosmetic procedures: a systematic rapid evidence assessment. Aesthetic Plastic Surgery, 38(5), 1030-1040. doi:10.1007/s00266-014-0369-4 | Social Science Research Unit, EPPI-Centre, Institute of Education, University of London                                                                                                  | GBR | 2014 | psychological outcomes of cosmetic procedures         | Treatment       | cosmetic interventions                                 | inpatient                           | Inpatient/Hospital |
| RR | 176 | 2011 | 1 | Geddes et al., 2011, R. Geddes, J. Frank, S. Haw, A rapid review of key strategies to improve the cognitive and social development of children in Scotland, Health Policy, 101 (2011), pp. 20–28 doi:10.1016/j.healthpol.2010.08.013                                                              | Public Health Research and Policy, MRC Human Genetics Unit building, Western General Hospital, Activity Research (CEDAR), Institute of Public Health, University of Cambridge            | GBR | 2011 | cognitive and social development of children          | Treatment       | early childhood interventions                          | community setting                   | Community          |
| RR | 177 | 2013 | 1 | Humphreys, DK, Ogilvie, D. Synthesising evidence for equity impacts of population-based physical activity interventions: A pilot study. Int J Behav Nutr Phys Act. 2013;10:76. DOI: 10.1186/1479-5868-10-76                                                                                       | Public Health, University of Cambridge                                                                                                                                                   | GBR | 2013 | population-level interventions on social inequalities | Prevention      | population-based physical activity interventions       | community setting                   | Community          |
| RR | 178 | 2014 | 1 | Muñoz, K., Caballero, A., & White, K. (2014). Effectiveness of questionnaires for screening hearing of school-age children: a comprehensive literature review. International Journal Of Audiology, 53(12), 910-914. doi:10.3109/14992027.2014.943846                                              | Communication Disorders & Deaf Education, Utah State University, Logan, Utah, USA                                                                                                        | USA | 2014 | hearing loss in children                              | community-based | screening for hearing loss                             | school setting                      | Community          |
| RR | 179 | 2014 | 1 | Physically Oriented Therapies for the Self-Management of Chronic Pain Symptoms, Cindy Crawford, Courtney Lee, Todd May, Active Self-Care Therapies for Pain (PACT) Working Group, Pain Medicine Apr 2014, 15 (S1) S54-S65; DOI: 10.1111/pme.12410                                                 | Samueli Institute, Alexandria, Virginia, USA                                                                                                                                             | USA | 2014 | chronic pain management                               | Treatment       | Physically oriented therapies                          | therapy setting                     | Outpatient         |
| RR | 180 | 2014 | 1 | Moe-Byrne, T., Chambers, D., Harden, M., McDaid, C., Behaviour change interventions to promote prescribing of generic drugs: A rapid evidence synthesis and systematic review (2014) BMJ Open, 4 (5), art. no. e004623. doi: 10.1136/bmjopen-2013-004623                                          | University of York, Centre for Reviews and Dissemination, York, UK                                                                                                                       | GBR | 2014 | prescribing generic drugs                             | Health Services | behaviour change interventions                         | National Health Service and similar | different/other    |
| RR | 181 | 2014 | 1 | health interventions to monitor, promote and improve the health of adults with intellectual disabilities in the community: a systematic review. Research in Developmental Disabilities 35, 887–907. doi: 10.1016/j.ridd.2014.01.010                                                               | Mental Health Sciences, Charles Bell House, 2nd Floor, 67-73 Riding House Street, London W1W 7EJ, Department of Health Sciences, University of York, York, YO10 5DD, United Kingdom (UK) | GBR | 2014 | intellectual disabilities                             | Treatment       | carer-led interventions                                | community setting (carer-led)       | Community          |
| RR | 182 | 2011 | 1 | Mann R, Gilbody S. Validity of two case finding questions to detect postnatal depression: a review of diagnostic test accuracy. J Affect Disord. 2011;133:388–97. doi:10.1016/j.jad.2010.11.015.                                                                                                  | Health Promotion Research Centre, National University of Ireland Galway, Galway, Ireland                                                                                                 | IRL | 2013 | postnatal depression                                  | community-based | Assessing PND with different methods                   | post-birth setting                  | Outpatient         |
| RR | 183 | 2013 | 1 | Barry, M. M., D'Eath, M., & Sixsmith, J. (2013). Interventions for improving population health literacy: insights from a rapid review of the evidence. Journal Of Health Communication, 18(12), 1507-1522. doi:10.1080/10810730.2013.840699                                                       | Health Promotion Research Centre, National University of Ireland Galway, Galway, Ireland                                                                                                 | IRL | 2013 | population health literacy                            | Health Services | Communication / health literacy interventions          | community setting                   | Community          |
| RR | 184 | 2013 | 1 | Kessel, A., Zambon, M., Nguyen-Van-Tam, J. S. and on behalf of the UK Antiviral Effectiveness Review Group (2013), Neuraminidase inhibitors for influenza: a review and public health perspective in the aftermath of the 2009 pandemic. Influenza and Other Respiratory Viruses, 7: 14–24. doi:  | Influenza Research Group, Division of Epidemiology and Public Health, School of Community Health                                                                                         | GBR | 2013 | influenza management and prevention                   | Treatment       | neuraminidase inhibitors (NAIs)                        | community (focuses on epidemics)    | Community          |

Tabelle1

|                                                                |               |                |     |                                                                                    |                                             |                     |   |
|----------------------------------------------------------------|---------------|----------------|-----|------------------------------------------------------------------------------------|---------------------------------------------|---------------------|---|
| patients suffering from chronic pain                           | 711           | adult          | m/f | governmental, institutional                                                        | none                                        | none mentioned      | 0 |
| general population participants requesting cosmetic procedures | 115613        | no restriction | m/f | governmental, institutional: Policy Research Programme in the Department of Health | none                                        | yes (not mentioned) | 1 |
| children 0–5 years                                             | not mentioned | no restriction | m/f | institutional: SCPHRP is funded by the Medical Research Council                    | not mentioned                               | none mentioned      | 0 |
| general population                                             | not mentioned | no restriction | m/f | institutional: British Heart Foundation, Economic and Social Research Council,     | none                                        | none mentioned      | 0 |
| school age children                                            | 2717          | 2 - 13         | m/f | governmental, institutional                                                        | none                                        | yes (not mentioned) | 0 |
| patients suffering from chronic pain                           | 1087          | adult          | m/f | governmental, institutional                                                        | none                                        | none mentioned      | 0 |
| healthcare providers                                           | not mentioned | adult          | m/f | institutional: NIHR CLAHRC for Leeds, York & Bradford                              | none                                        | yes                 | 1 |
| patients with and without intellectual disabilities            | 4721          | > 2            | m/f | governmental, institutional: National Institute for Health Research (NIHR)         | none                                        | yes                 | 0 |
| adult women with live birth                                    | 506           | adult          | f   | institutional: Hull York Medical School (HYMS), University of York, York           | none                                        | yes (not mentioned) | 0 |
| adult health service users                                     | not mentioned | adult          | m/f | institutional: European Centre for Disease Prevention and Control (ECDC)           | not mentioned                               | yes (not mentioned) | 1 |
| Population                                                     | not mentioned | no restriction | m/f | institutional: Health Protection Agency (HPA) and the Department of                | funding for influenza-related research from |                     | 1 |



Tabelle1

|    |     |      |   |                                                                                                                                                                                                                                                                                                                                                                                                                                                                                                                                                                                        |                                                                                                 |     |      |                                                 |                 |                                      |                                                   |                    |
|----|-----|------|---|----------------------------------------------------------------------------------------------------------------------------------------------------------------------------------------------------------------------------------------------------------------------------------------------------------------------------------------------------------------------------------------------------------------------------------------------------------------------------------------------------------------------------------------------------------------------------------------|-------------------------------------------------------------------------------------------------|-----|------|-------------------------------------------------|-----------------|--------------------------------------|---------------------------------------------------|--------------------|
| RR | 185 | 2012 | 1 | McMurrin, M. (2012). Individual-level interventions for alcohol-related violence: a rapid evidence assessment. <i>Criminal Behaviour And Mental Health: CBMH</i> , 22(1), 14-28. doi:10.1002/cbm.821                                                                                                                                                                                                                                                                                                                                                                                   | Institute of Mental Health, University of Nottingham, Nottingham, UK                            | GBR | 2012 | alcohol-related violence                        | Treatment       | psychological interventions          | therapy setting                                   | Outpatient         |
| RR | 186 | 2014 | 1 | Smit, Jonna K. van Vulpen, Inge Wegner, Inge Stegeman, and Wilko Grolman, Rapid Systematic Review of Normal Audiometry Results as a Predictor for Benign Paroxysmal Positional Vertigo. <i>Otolaryngology -- Head and Neck Surgery</i> June 2014 150: 919-924, KONNYU, K., KWOK, E., SKIDMORE, B., MOHER, D.. The effectiveness and safety of emergency department short stay units: a rapid review. <i>Open Medicine</i> , North America, 6, jan. 2012. Available at: <a href="http://www.openmedicine.ca/article/view/478/449">http://www.openmedicine.ca/article/view/478/449</a> . | Otorhinolaryngology--Head and Neck Surgery, University Medical Center, Utrecht, The Netherlands | NED | 2014 | benign paroxysmal positional vertigo            | community-based | pure-tone audiometry                 | audiometry setting                                | Outpatient         |
| RR | 187 | 2012 | 1 | P., Rankin, N., and Kirsten, L. (2015) Clinical pathway for the screening, assessment and management of anxiety and depression in adult cancer patients: Australian guidelines. <i>Psycho-Oncology</i> , 24: 987–1001. doi: 10.1002/pon.3920.                                                                                                                                                                                                                                                                                                                                          | Department of Emergency Medicine at The Ottawa Hospital                                         | CAN | 2012 | length of emergency department stay             | Health Services | ED short stay units (SSU)            | emergency department                              | Inpatient/Hospital |
| RR | 188 | 2015 | 1 | R.B. Costello, C.V. Lentino, C.C. Boyd, M.L. O'Connell, C.C. Crawford, M.L. Sprengel, et al., The effectiveness of melatonin for promoting healthy sleep: a rapid evidence assessment of the literature, <i>Nutr. J.</i> , 13 (2014), p. 106 DOI: 10.1186/1475-2891-13-106                                                                                                                                                                                                                                                                                                             | operative Research Group (PoCoG), The University of Sydney, Sydney, NSW, Australia              | AUS | 2015 | anxiety and depression in adult cancer patients | community-based | screening for anxiety and depression | hospital community setting (night and shift work) | Inpatient/Hospital |
| RR | 189 | 2014 | 1 | Lee, C., Crawford, C., & Swann, S. (2014). Multimodal, integrative therapies for the self-management of chronic pain symptoms. <i>Pain Medicine</i> (Malden, Mass.), 15 Suppl 1S76-S85. doi:10.1111/pme.12408                                                                                                                                                                                                                                                                                                                                                                          | Emergency Medicine, Uniformed Services University of the Health Sciences                        | USA | 2014 | sleep quality / sleep disorders                 | Treatment       | Melatonin application                |                                                   | Community          |
| RR | 190 | 2014 | 1 |                                                                                                                                                                                                                                                                                                                                                                                                                                                                                                                                                                                        | Samueli Institute, Alexandria, Virginia, USA                                                    | USA | 2014 | chronic pain management                         | Treatment       | Multimodal, Integrative Therapies    | community (self-management)                       | Community          |

## Rapid reviews (CRD databases)

|        |     |      |   |                                                                                                                                                                                                                                                                                                                                                                        |                                                                                       |     |      |                                                    |                 |                                |                         |                    |
|--------|-----|------|---|------------------------------------------------------------------------------------------------------------------------------------------------------------------------------------------------------------------------------------------------------------------------------------------------------------------------------------------------------------------------|---------------------------------------------------------------------------------------|-----|------|----------------------------------------------------|-----------------|--------------------------------|-------------------------|--------------------|
| CRD Rf | 191 | 2015 | 1 | Health Quality Ontario. Prophylactic antibiotics for individuals with chronic obstructive pulmonary disease (COPD): a rapid review. <i>Health Quality Ontario</i> ; 2015 February. 26 p. Available from: <a href="http://www.hqontario.ca/evidence/evidence-process/episodes-of-ghazipura">http://www.hqontario.ca/evidence/evidence-process/episodes-of-ghazipura</a> | Health Quality Ontario, <a href="http://www.hqontario.ca">http://www.hqontario.ca</a> | CAN | 2015 | prophylactic use of azithromycin for COPD patients | Treatment       | Azithromycin                   | outpatients             | Outpatient         |
| CRD Rf | 192 | 2013 | 1 | Ghazipura M. Community versus inpatient rehabilitation in hip fracture patients: a rapid review. <i>Toronto, Ontario</i> ; 2013 Apr. 23 p. Available from: <a href="http://www.hqontario.ca/evidence/publications-and-oh-tac-recommendations/rapid-reviews">http://www.hqontario.ca/evidence/publications-and-oh-tac-recommendations/rapid-reviews</a> .               | Health Quality Ontario, <a href="http://www.hqontario.ca">http://www.hqontario.ca</a> | CAN | 2013 | Hip fracture rehabilitation                        | Treatment       | physiotherapy                  | inpatient vs outpatient | Multiple           |
| CRD Rf | 193 | 2015 | 1 | Health Quality Ontario. Sodium restriction in heart failure: a rapid review. <i>Toronto: Health Quality Ontario</i> ; 2015 February. 20 p. Available from: <a href="http://www.hqontario.ca/evidence/evidence-process/episodes-of-care#community-chf">http://www.hqontario.ca/evidence/evidence-process/episodes-of-care#community-chf</a>                             | Health Quality Ontario, <a href="http://www.hqontario.ca">http://www.hqontario.ca</a> | CAN | 2015 | heart failure                                      | Prevention      | restricting sodium             | community setting       | Community          |
| CRD Rf | 194 | 2014 | 1 | Lambrinos, A. Preoperative consultations: a rapid review. <i>Toronto: Health Quality Ontario</i> ; 2014 March. 19 p. Available from: <a href="http://www.hqontario.ca/evidence/evidence-process/appropriateness-initiative#preop-consult">http://www.hqontario.ca/evidence/evidence-process/appropriateness-initiative#preop-consult</a> .                             | Health Quality Ontario, <a href="http://www.hqontario.ca">http://www.hqontario.ca</a> | CAN | 2014 | preoperative assessment                            | Health Services | preoperative consultations     | hospital (surgery)      | Inpatient/Hospital |
| CRD Rf | 195 | 2013 | 1 | Ling D. Role of screening for respiratory syncytial virus or influenza and empirical antiviral treatment for patients with community-acquired pneumonia: a rapid review. <i>Toronto, ON: Health Quality Ontario</i> ; 2013 November. 17 p. Available from: <a href="http://www.hqontario.ca">http://www.hqontario.ca</a>                                               | Health Quality Ontario, <a href="http://www.hqontario.ca">http://www.hqontario.ca</a> | CAN | 2013 | CAP (pneumonia) management                         | Treatment       | screening for RSV or influenza | hospital inpatients     | inpatient/Hospital |

Tabelle1

|                                              |                          |     |                                                                            |                                   |                     |   |
|----------------------------------------------|--------------------------|-----|----------------------------------------------------------------------------|-----------------------------------|---------------------|---|
| alcohol-associated violence problems         | 1265 > 14                | m/f | governmental, institutional                                                | not mentioned                     | yes (not mentioned) | 0 |
| Patients with vertigo                        | 102 adult                | m/f | governmental, institutional                                                | none                              | none mentioned      | 0 |
| patients at emergency department             | no restriction<br>9963 s | m/f | governmental, institutional: Canadian Institutes of Health Research        | is a contributing editor for Open | no protocol         | 1 |
| cancer patients                              | not mentioned<br>adult   | m/f | governmental, institutional                                                | not mentioned                     | no protocol         | 1 |
| healthy population or patients with insomnia | 1903 adult               | m/f | institutional: Defense Health Program and USUHS, Consortium for Health and | none                              | not published       | 1 |
| patients with chronic pain symptoms          | 3561 adult               | m/f | governmental, institutional                                                | none                              | yes (not mentioned) | 1 |
| COPD patients                                | 176 adult                | m/f | governmental, institutional                                                | none                              | none mentioned      | 1 |
| hip fracture patients                        | 195 > 65                 | m/f | governmental, institutional                                                | none                              | none mentioned      | 1 |
| patients with heart failure                  | 3318 > 53                | m/f | governmental, institutional                                                | none                              | none mentioned      | 1 |
| surgery patients                             | 372746 adult             | m/f | governmental, institutional                                                | none                              | none mentioned      | 1 |
| patients with CAP                            | 0 adult                  | f/m | governmental, institutional                                                | none                              | none mentioned      | 1 |

Tabelle1

|        |     |      |   |                                                                                                                                                                                                                                                                                                                                                                                                         |                                                                                           |     |      |                                                     |                 |                                              |                                            |                     |
|--------|-----|------|---|---------------------------------------------------------------------------------------------------------------------------------------------------------------------------------------------------------------------------------------------------------------------------------------------------------------------------------------------------------------------------------------------------------|-------------------------------------------------------------------------------------------|-----|------|-----------------------------------------------------|-----------------|----------------------------------------------|--------------------------------------------|---------------------|
| CRD RF | 196 | 2015 | 1 | Health Quality Ontario. Communication of discharge instructions: a rapid review. Toronto: Health Quality Ontario; 2015 February. 18 p. Available from: <a href="http://www.hqontario.ca/evidence/evidence-process/episodes-of-care#community-chf">http://www.hqontario.ca/evidence/evidence-process/episodes-of-care#community-chf</a> .                                                                | Health Quality Ontario, <a href="http://www.hqontario.ca">http://www.hqontario.ca</a>     | CAN | 2015 | discharge procedure                                 | Health Services | providing a written discharge plan           | acute hospital to home (discharge-setting) | different/ other    |
| CRD RF | 197 | 2013 | 1 | Community-Acquired Pneumonia. Toronto, ON: Health Quality Ontario; 2013 November. 23 p. Available from: <a href="http://www.hqontario.ca/evidence/publications-and-ohnac-recommendations/rapid-review">http://www.hqontario.ca/evidence/publications-and-ohnac-recommendations/rapid-review</a>                                                                                                         | Health Quality Ontario, <a href="http://www.hqontario.ca">http://www.hqontario.ca</a>     | CAN | 2013 | CAP (pneumonia) management                          | Treatment       | timing of antibiotics administration         | hospital                                   | inpatient/ Hospital |
| CRD RF | 198 | 2013 | 1 | pulmonary disease (COPD): a rapid review. Toronto, ON: Health Quality Ontario; 2013 Jan. 20 p. Available from: <a href="http://www.hqontario.ca/evidence/publications-and-ohnac-recommendations/rapid-review">www.hqontario.ca/evidence/publications-and-ohnac-recommendations/rapid-review</a>                                                                                                         | Health Quality Ontario, <a href="http://www.hqontario.ca">http://www.hqontario.ca</a>     | CAN | 2013 | COPD management                                     | Treatment       | action plans                                 | home and outpatients setting               | Multiple            |
| CRD RF | 199 | 2015 | 1 | Wang M. Pulmonary rehabilitation in the home versus other settings for individuals with chronic obstructive pulmonary disease (COPD): a rapid review. Toronto: Health Quality Ontario; 2015 February. 23 p. Available from: <a href="http://www.hqontario.ca/evidence/ev">http://www.hqontario.ca/evidence/ev</a>                                                                                       | Health Quality Ontario, <a href="http://www.hqontario.ca">http://www.hqontario.ca</a>     | CAN | 2015 | pulmonary rehabilitation                            | Treatment       | home-based rehabilitation                    | home setting                               | Home                |
| CRD RF | 200 | 2013 | 1 | Bungay, H., & Vella-Burrows, T. (2013). The effects of participating in creative activities on the health and well-being of children and young people: A rapid review of the literature. <i>Perspectives in Public Health</i> , 133(1), 44–52.                                                                                                                                                          | Department of Allied Health, Anglia Ruskin University, East Road, Cambridge, CB1 1 PT, UK | GBR | 2013 | lifestyle                                           | Prevention      | participating in creative activities         | community setting (activities)             | Community           |
| CRD RF | 201 | 2015 | 1 | Lambrinos A. Home-based exercise programs in heart failure: a rapid review. Toronto: Health Quality Ontario; 2015 February. 21 p. Available from: <a href="http://www.hqontario.ca/evidence/evidence-process/episodes-of-care#community-chf">http://www.hqontario.ca/evidence/evidence-process/episodes-of-care#community-chf</a> .                                                                     | Health Quality Ontario, <a href="http://www.hqontario.ca">http://www.hqontario.ca</a>     | CAN | 2015 | secondary prevention of heart failure               | Prevention      | home-based exercise programs                 | home setting                               | Home                |
| CRD RF | 202 | 2015 | 1 | Health Quality Ontario. Home-based versus centre-based rehabilitation for community-dwelling postacute stroke patients: an economic rapid review. Toronto: Health Quality Ontario; 2015 February. 23 p. Available from: <a href="http://www.hqontario.ca/evidence/evidence-process/episodes-of-care#community-chf">http://www.hqontario.ca/evidence/evidence-process/episodes-of-care#community-chf</a> | Health Quality Ontario, <a href="http://www.hqontario.ca">http://www.hqontario.ca</a>     | CAN | 2015 | stroke rehabilitation                               | Treatment       | centre-based vs home-based rehabilitation    | rehabilitation centre vs home setting      | Multiple            |
| CRD RF | 203 | 2013 | 1 | Nikitovic M. Intensity of rehabilitation after hip fracture: a rapid review. Toronto, ON: Health Quality Ontario; 2013 Apr. 17 p. Available from: <a href="http://www.hqontario.ca/evidence/publications-and-ohnac-recommendations/rapid-reviews">http://www.hqontario.ca/evidence/publications-and-ohnac-recommendations/rapid-reviews</a> .                                                           | Health Quality Ontario, <a href="http://www.hqontario.ca">http://www.hqontario.ca</a>     | CAN | 2013 | rehabilitation after hip fracture                   | Treatment       | increasing rehabilitation intensity          | rehabilitation setting                     | Inpatient/ Hospital |
| CRD RF | 204 | 2015 | 1 | Self-management and educational interventions in the postacute stroke population: a rapid review. Toronto, ON: Health Quality Ontario; 2015 February. 23 p. Available from: <a href="http://www.hqontario.ca/evidence/evidence-process/episodes-of-care#community-strok">http://www.hqontario.ca/evidence/evidence-process/episodes-of-care#community-strok</a>                                         | Health Quality Ontario, <a href="http://www.hqontario.ca">http://www.hqontario.ca</a>     | CAN | 2015 | secondary prevention of stroke, COPD, heart failure | Prevention      | self-management or educational interventions | home and community setting                 | Multiple            |
| CRD RF | 205 | 2015 | 1 | Health Quality Ontario. Criteria for referral to home care: a rapid review. Toronto: Health Quality Ontario; 2015 February. 20 p. Available from: <a href="http://www.hqontario.ca/evidence/evidence-process/episodes-of-care#community-chf">http://www.hqontario.ca/evidence/evidence-process/episodes-of-care#community-chf</a> .                                                                     | Health Quality Ontario, <a href="http://www.hqontario.ca">http://www.hqontario.ca</a>     | CAN | 2015 | criteria for referring to home care services        | Health Services | home care services                           | home care setting                          | Home                |
| CRD RF | 206 | 2014 | 1 | Baidoobonso S. Effect of supportive interventions on informal caregivers of people at the end of life: a rapid review. Toronto: Health Quality Ontario; 2014 December. 25 p. Available from: <a href="http://www.hqontario.ca/evidence/publications-and-ohnac-recommendations/rapid-reviews">http://www.hqontario.ca/evidence/publications-and-ohnac-recommendations/rapid-reviews</a>                  | Health Quality Ontario, <a href="http://www.hqontario.ca">http://www.hqontario.ca</a>     | CAN | 2014 | palliative care                                     | Health Services | supportive interventions                     | palliative care setting                    | Inpatient/ Hospital |
| CRD RF | 207 | 2014 | 1 | Miani C, Ball S, Pitchforth E, Exley J, King S, Roland M, et al. Organisational interventions to reduce length of stay in hospital: a rapid evidence assessment. <i>Health Serv Deliv Res</i> 2014;2(52). DOI: 10.3310/hsdr02520                                                                                                                                                                        | RAND Europe, Cambridge, UK                                                                | GBR | 2014 | length of stay in acute care hospitals              | Health Services | various                                      | hospital                                   | Inpatient/ Hospital |

Tabelle1

|                                           |               |          |     |                                                                  |               |                |   |
|-------------------------------------------|---------------|----------|-----|------------------------------------------------------------------|---------------|----------------|---|
| patients being discharged from hospital   | 0             | adult    | f/m | governmental, institutional                                      | none          | none mentioned | 1 |
| patients with CAP                         | not mentioned | adult    | m/f | governmental, institutional                                      | none          | none mentioned | 1 |
| patients with COPD                        | 574           | adult    | m/f | governmental, institutional                                      | none          | none mentioned | 1 |
| patients with COPD                        | ca 400        | > 40     | m/f | governmental, institutional                                      | none          | none mentioned | 1 |
| children 11 - 18                          | ca 3500       | 11 to 18 | m/f | funded by Lambeth PCT                                            | not mentioned | none mentioned | 0 |
| heart failure patients                    | 296           | adult    | m/f | governmental, institutional                                      | none          | none mentioned | 1 |
| postacute stroke patients                 | not mentioned | adult    | m/f | governmental, institutional                                      | none          | none mentioned | 1 |
| patients with hip fracture                | 0             | adult    | f/m | governmental, institutional                                      | none          | none mentioned | 1 |
| post-acute stroke, CHF, and COPD patients | not mentioned | adult    | m/f | governmental, institutional                                      | none          | none mentioned | 1 |
| adults                                    | 895           | adult    | m/f | governmental, institutional                                      | none          | none mentioned | 1 |
| patients at the end of life               | 1836          | adult    | m/f | governmental, institutional                                      | none          | none mentioned | 1 |
| acute hospital patients                   | 142899        | adult    | m/f | governmental, institutional: funded by the HS&DR programme, NIHR | none          | yes            | 0 |

Tabelle1

|        |     |      |   |                                                                                                                                                                                                                                                                                                                                                                                                      |                                                                                       |     |      |                                         |                 |                                          |                                               |                    |
|--------|-----|------|---|------------------------------------------------------------------------------------------------------------------------------------------------------------------------------------------------------------------------------------------------------------------------------------------------------------------------------------------------------------------------------------------------------|---------------------------------------------------------------------------------------|-----|------|-----------------------------------------|-----------------|------------------------------------------|-----------------------------------------------|--------------------|
| CRD Rf | 208 | 2015 | 1 | Wang M. Airway clearance techniques for patients with stable chronic obstructive pulmonary disease (COPD): a rapid review. Toronto: Health Quality Ontario; 2015 February. 23 p. Available from: <a href="http://www.hqontario.ca/evidence/evidence-process/episodes-of-care#community-chf">http://www.hqontario.ca/evidence/evidence-process/episodes-of-care#community-chf</a> .                   | Health Quality Ontario, <a href="http://www.hqontario.ca">http://www.hqontario.ca</a> | CAN | 2015 | COPD management                         | Treatment       | airway clearance techniques              | outpatients                                   | Outpatient         |
| CRD Rf | 209 | 2015 | 1 | Health Quality Ontario. Exercise programs after pulmonary rehabilitation for patients with chronic obstructive pulmonary disease (COPD). Toronto: Health Quality Ontario; 2015 February. 20 p. Available from: <a href="http://www.hqontario.ca/evidence/evidence-process/episodes-of-care#community-chf">http://www.hqontario.ca/evidence/evidence-process/episodes-of-care#community-chf</a> .     | Health Quality Ontario, <a href="http://www.hqontario.ca">http://www.hqontario.ca</a> | CAN | 2015 | COPD rehabilitation                     | Treatment       | exercise programs                        | community setting (exercise)                  | Community          |
| CRD Rf | 210 | 2015 | 1 | Health Quality Ontario. Respiratory services in home care for individuals with chronic obstructive pulmonary disease (COPD): a rapid review. Toronto: Health Quality Ontario; 2015 February. 20 p. Available from: <a href="http://www.hqontario.ca/evidence/evidence-process/episodes-of-care#community-chf">http://www.hqontario.ca/evidence/evidence-process/episodes-of-care#community-chf</a> . | Health Quality Ontario, <a href="http://www.hqontario.ca">http://www.hqontario.ca</a> | CAN | 2015 | respiratory rehabilitation              | Treatment       | respiratory therapy                      | therapy setting                               | Outpatient         |
| CRD Rf | 211 | 2013 | 1 | Brener S. Optimal timing to begin an active rehabilitation program after a hip fracture: a rapid review. Toronto, ON: Health Quality Ontario; 2013 Apr. 20 p. Available from: <a href="http://www.hqontario.ca/evidence/publications-and-ohtac-recommendations/rapid-reviews">http://www.hqontario.ca/evidence/publications-and-ohtac-recommendations/rapid-reviews</a> .                            | Health Quality Ontario, <a href="http://www.hqontario.ca">http://www.hqontario.ca</a> | CAN | 2013 | rehabilitation after hip fracture       | Treatment       | active rehabilitation program            | rehabilitation setting                        | Inpatient/Hospital |
| CRD Rf | 212 | 2013 | 1 | Schlink A. The effectiveness of statins for primary prevention: a rapid review. Toronto, ON: Health Quality Ontario; 2013 Feb. 23 p. Available from: <a href="http://www.hqontario.ca/evidence/publications-and-ohtac-recommendations/rapid-reviews">http://www.hqontario.ca/evidence/publications-and-ohtac-recommendations/rapid-reviews</a> .                                                     | Health Quality Ontario, <a href="http://www.hqontario.ca">http://www.hqontario.ca</a> | CAN | 2013 | coronary/stroke prevention              | Prevention      | statin administration                    | community setting                             | Community          |
| CRD Rf | 213 | 2015 | 1 | Health Quality Ontario. Physical activity counselling: a rapid review. Toronto: Health Quality Ontario; 2015 February. 20 p. Available from: <a href="http://www.hqontario.ca/evidence/evidence-process/episodes-of-care#community-chf">http://www.hqontario.ca/evidence/evidence-process/episodes-of-care#community-chf</a> .                                                                       | Health Quality Ontario, <a href="http://www.hqontario.ca">http://www.hqontario.ca</a> | CAN | 2015 | secondary prevention of heart failure   | Prevention      | exercise counselling                     | community setting (exercise)                  | Community          |
| CRD Rf | 214 | 2015 | 1 | Health Quality Ontario. Cognitive-behavioural therapy for anxiety and depression in patients with COPD: a rapid review. Toronto: Health Quality Ontario; 2015 February. 21 p. Available from: <a href="http://www.hqontario.ca/evidence/evidence-process/episodes-of-care#community-chf">http://www.hqontario.ca/evidence/evidence-process/episodes-of-care#community-chf</a> .                      | Health Quality Ontario, <a href="http://www.hqontario.ca">http://www.hqontario.ca</a> | CAN | 2015 | anxiety and depression in COPD patients | Treatment       | cognitive-behavioural therapy (CBT)      | therapy setting                               | Outpatient         |
| CRD Rf | 215 | 2015 | 1 | Ghazipura M. Cardiovascular and aerobic exercise in postacute stroke patients: a rapid review. Toronto, ON: Health Quality Ontario; 2015 February. 17 p. Available from: <a href="http://www.hqontario.ca/evidence/evidence-process/episodes-of-care#community-stroke">http://www.hqontario.ca/evidence/evidence-process/episodes-of-care#community-stroke</a> .                                     | Health Quality Ontario, <a href="http://www.hqontario.ca">http://www.hqontario.ca</a> | CAN | 2015 | secondary prevention of stroke          | Treatment       | aerobic training/cardiovascular exercise | community setting (exercise)                  | Community          |
| CRD Rf | 216 | 2015 | 1 | Health Quality Ontario. Aerobic exercise training in patients with heart failure: a rapid review. Toronto: Health Quality Ontario; 2015 February. 19 p. Available from: <a href="http://www.hqontario.ca/evidence/evidence-process/episodes-of-care#community-chf">http://www.hqontario.ca/evidence/evidence-process/episodes-of-care#community-chf</a> .                                            | Health Quality Ontario, <a href="http://www.hqontario.ca">http://www.hqontario.ca</a> | CAN | 2015 | secondary prevention of heart failure   | Prevention      | aerobic exercise                         | community setting (exercise)                  | Community          |
| CRD Rf | 217 | 2015 | 1 | Health Quality Ontario. Care coordination for postacute stroke, chronic obstructive pulmonary disease, and heart failure clients: an economic rapid review. Toronto: Health Quality Ontario; 2015 February. 20 p. Available from: <a href="http://www.hqontario.ca/evidence">http://www.hqontario.ca/evidence</a> .                                                                                  | Health Quality Ontario, <a href="http://www.hqontario.ca">http://www.hqontario.ca</a> | CAN | 2015 | post-acute stroke, COPD, or CHF         | Health Services | care coordination intervention           | hospital hospital to home (discharge-setting) | Inpatient/Hospital |
| CRD Rf | 218 | 2015 | 1 | Lambrinos A. Medication reconciliation at discharge: a rapid review. Toronto: Health Quality Ontario; 2015 February. 24 p. Available from: <a href="http://www.hqontario.ca/evidence/evidence-process/episodes-of-care#community-chf">http://www.hqontario.ca/evidence/evidence-process/episodes-of-care#community-chf</a> .                                                                         | Health Quality Ontario, <a href="http://www.hqontario.ca">http://www.hqontario.ca</a> | CAN | 2015 | Discharge procedure                     | Health Services | medication reconciliation                |                                               | Different/other    |
| CRD Rf | 219 | 2013 | 1 | McCurdy BR. Inhospital physiotherapy for acute exacerbations of chronic obstructive pulmonary disease (AECOPD): a rapid review. Toronto, ON: Health Quality Ontario; 2012 Dec. 28 p. Available from: <a href="http://www.hqontario.ca/evidence/publications-and-ohtac-recommendations">http://www.hqontario.ca/evidence/publications-and-ohtac-recommendations</a> .                                 | Health Quality Ontario, <a href="http://www.hqontario.ca">http://www.hqontario.ca</a> | CAN | 2013 | acute exacerbating COPD                 | Treatment       | inhospital physiotherapy                 | hospital                                      | Inpatient/Hospital |

Tabelle1

|                                                             |               |       |     |                             |      |                |   |
|-------------------------------------------------------------|---------------|-------|-----|-----------------------------|------|----------------|---|
| patients with stable COPD                                   | 525           | adult | m/f | governmental, institutional | none | none mentioned | 1 |
| patients with COPD or pneumonia                             | not mentioned | adult | m/f | governmental, institutional | none | none mentioned | 1 |
| patients with respiratory disease                           | 37            | adult | m/f | governmental, institutional | none | none mentioned | 1 |
| patients with hip fracture                                  | 339           | adult | m/f | governmental, institutional | none | none mentioned | 1 |
| adults                                                      | 169921        | adult | m/f | governmental, institutional | none | none mentioned | 1 |
| patients with heart failure                                 | 1628          | adult | m/f | governmental, institutional | none | none mentioned | 1 |
| patients with COPD                                          | not mentioned | adult | m/f | governmental, institutional | none | none mentioned | 1 |
| postacute stroke patients                                   | 399           | adult | m/f | governmental, institutional | none | none mentioned | 1 |
| patients with heart failure post-acute stroke, COPD, or CHF | 3662          | adult | m/f | governmental, institutional | none | none mentioned | 1 |
| being discharged, receiving medication                      | 0 -           |       | f/m | governmental, institutional | none | none mentioned | 1 |
| patients with acute exacerbating COPD                       | 2447          | adult | m/f | governmental, institutional | none | none mentioned | 1 |
| patients with acute exacerbating COPD                       | not mentioned | adult | m/f | governmental, institutional | none | none mentioned | 1 |

Tabelle1

|        |     |      |   |                                                                                                                                                                                                                                                                                                                                                                 |                                                                                       |     |      |                              |           |                                          |          |                    |
|--------|-----|------|---|-----------------------------------------------------------------------------------------------------------------------------------------------------------------------------------------------------------------------------------------------------------------------------------------------------------------------------------------------------------------|---------------------------------------------------------------------------------------|-----|------|------------------------------|-----------|------------------------------------------|----------|--------------------|
| CRD RF | 220 | 2013 | 1 | Health Quality Ontario. Effectiveness and safety of thrombolytics for ischemic stroke: a rapid review. Toronto, ON: Health Quality Ontario; 2013 Jan. 25 p. Available from: <a href="http://www.hqontario.ca/evidence/publications-and-ohrac-recommendations/rapid-revi">http://www.hqontario.ca/evidence/publications-and-ohrac-recommendations/rapid-revi</a> | Health Quality Ontario, <a href="http://www.hqontario.ca">http://www.hqontario.ca</a> | CAN | 2013 | treatment of ischemic stroke | Treatment | intravenous thrombolytics administration | hospital | Inpatient/Hospital |
|--------|-----|------|---|-----------------------------------------------------------------------------------------------------------------------------------------------------------------------------------------------------------------------------------------------------------------------------------------------------------------------------------------------------------------|---------------------------------------------------------------------------------------|-----|------|------------------------------|-----------|------------------------------------------|----------|--------------------|

Tabelle1

|                                      |      |       |     |                                |      |                       |   |
|--------------------------------------|------|-------|-----|--------------------------------|------|-----------------------|---|
| patients with<br>ischaemic<br>stroke | 6288 | adult | m/f | governmental,<br>institutional | none | none<br>mentione<br>d | 1 |
|--------------------------------------|------|-------|-----|--------------------------------|------|-----------------------|---|
