# Supplementary material for: Characteristics of stakeholder involvement in systematic and rapid reviews: a methodological review in the area of health services research
Source: PubMed Central journal article supplement — BMJ Open. 2019 Aug 15;9(8):e024587. doi: 10.1136/bmjopen-2018-024587 (PMC6701675; doi:10.1136/bmjopen-2018-024587), 2019-08-15
Supplement: bmjopen-2018-024587supp007.pdf [file bmjopen-2018-024587supp007.pdf]

| Review type | Sequence of exclusion after randomization | Reference                                                                                                                                                                                                                                                                                    |
|-------------|-------------------------------------------|----------------------------------------------------------------------------------------------------------------------------------------------------------------------------------------------------------------------------------------------------------------------------------------------|
| CSR         | 1                                         | Verra Wiebe C, van den Boom Lennard GH, Jacobs W, Clement Darren J, Wymenga Ate AB, Nelissen Rob GHH. Retention versus sacrifice of the posterior cruciate ligament in total knee arthroplasty for treating osteoarthritis. <i>Cochrane Database of Systematic Reviews</i> [Internet]. 2013. |
| CSR         | 2                                         | Anie Kofi A, Massaglia P. Psychological therapies for thalassaemia. <i>Cochrane Database of Systematic Reviews</i> [Internet]. 2014.                                                                                                                                                         |
| CSR         | 3                                         | Wilkinson P, Izmeth Z. Continuation and maintenance treatments for depression in older people. <i>Cochrane Database of Systematic Reviews</i> [Internet]. 2012.                                                                                                                              |
| CSR         | 4                                         | van Dalen Elvira C, van As Jorrit W, de Camargo B. Methotrexate for high-grade osteosarcoma in children and young adults. <i>Cochrane Database of Systematic Reviews</i> [Internet]. 2011.                                                                                                   |
| CSR         | 5                                         | Omar Muhammad I, Alexander Cameron E. Drug treatment for faecal incontinence in adults. <i>Cochrane Database of Systematic Reviews</i> [Internet]. 2013.                                                                                                                                     |
| CSR         | 6                                         | Preston Nancy J, Hurlow A, Brine J, Bennett Michael I. Blood transfusions for anaemia in patients with advanced cancer. <i>Cochrane Database of Systematic Reviews</i> [Internet]. 2012.                                                                                                     |
| CSR         | 7                                         | Skoetz N, Bauer K, Elter T, Monsef I, Roloff V, Hallek M, et al. Alemtuzumab for patients with chronic lymphocytic leukaemia. <i>Cochrane Database of Systematic Reviews</i> [Internet]. 2012.                                                                                               |
| CSR         | 8                                         | Li Luying R, Sydenham E, Chaudhary B, Beecher D, You C. Glucocorticoid with cyclophosphamide for paraquat-induced lung fibrosis. <i>Cochrane Database of Systematic Reviews</i> [Internet]. 2014.                                                                                            |
| CSR         | 9                                         | Ohlsson A, Lacy Janet B. Intravenous immunoglobulin for preventing infection in preterm and/or low birth weight infants. <i>Cochrane Database of Systematic Reviews</i> [Internet]. 2013.                                                                                                    |
| CSR         | 10                                        | Gurusamy Kurinchi S, Giljaca V, Takwoingi Y, Higgie D, Poropat G, Štimac D, et al. Endoscopic retrograde cholangiopancreatography versus intraoperative cholangiography for diagnosis of common bile duct stones. <i>Cochrane Database of Systematic Reviews</i> [Internet]. 2015.           |
| CSR         | 11                                        | Zhang Y, Fang C, Dong Bi R, Wu T, Deng Jue L. Oxygen therapy for pneumonia in adults. <i>Cochrane Database of Systematic Reviews</i> [Internet]. 2012.                                                                                                                                       |
| CSR         | 12                                        | Qureshi Mosarrat J, Kumar M. D-Penicillamine for preventing retinopathy of prematurity in preterm infants. <i>Cochrane Database of Systematic Reviews</i> [Internet]. 2013.                                                                                                                  |
| CSR         | 13                                        | Di Nisio M, Peinemann F, Porreca E, Rutjes Anne WS. Primary prophylaxis for venous thromboembolism in patients undergoing cardiac or thoracic surgery. <i>Cochrane Database of Systematic Reviews</i> [Internet]. 2015.                                                                      |
| CSR         | 14                                        | Tan Hannah B, Daniila S, Murray A, Serra R, El Dib R, Henderson Tom OW, et al. Immunonutrition as an adjuvant therapy for burns. <i>Cochrane Database of Systematic Reviews</i> [Internet]. 2014.                                                                                            |
| CSR         | 15                                        | Hurlow A, Bennett Michael I, Robb Karen A, Johnson Mark I, Simpson Karen H, Oxberry Stephen G. Transcutaneous electric nerve stimulation (TENS) for cancer pain in adults. <i>Cochrane Database of Systematic Reviews</i> [Internet]. 2012.                                                  |
| CSR         | 16                                        | Dong Z, Xu J, Wang Z, Petrov Maxim S. Stents for the prevention of pancreatic fistula following pancreaticoduodenectomy. <i>Cochrane Database of Systematic Reviews</i> [Internet]. 2013.                                                                                                    |
| CSR         | 17                                        | Feagan Brian G, MacDonald John K. Oral 5-aminosalicylic acid for induction of remission in ulcerative colitis. <i>Cochrane Database of Systematic Reviews</i> [Internet]. 2012.                                                                                                              |
| CSR         | 18                                        | Dhiwakar M, Clement WA, Supriya M, McKerrow W. Antibiotics to reduce post-tonsillectomy morbidity. <i>Cochrane Database of Systematic Reviews</i> [Internet]. 2012.                                                                                                                          |
| CSR         | 19                                        | Gai Robin L, Vedula Satyanarayana S, Beck R. Corticosteroids for treating optic neuritis. <i>Cochrane Database of Systematic Reviews</i> [Internet]. 2015.                                                                                                                                   |
| CSR         | 20                                        | Andras A, Sala Tenna A, Crawford F. Vitamin K antagonists or low-molecular-weight heparin for the long term treatment of symptomatic venous thromboembolism. <i>Cochrane Database of Systematic Reviews</i> [Internet]. 2012.                                                                |
| CSR         | 21                                        | Rajaram Sujanthy S, Desai Nayan K, Kalra A, Gajera M, Cavanaugh Susan K, Brampton W, et al. Pulmonary artery catheters for adult patients in intensive care. <i>Cochrane Database of Systematic Reviews</i> [Internet]. 2013.                                                                |
| CSR         | 22                                        | Nelson Richard L, Kelsey P, Leeman H, Meardon N, Patel H, Paul K, et al. Antibiotic treatment for Clostridium difficile-associated diarrhea in adults. <i>Cochrane Database of Systematic Reviews</i> [Internet]. 2011.                                                                      |
| CSR         | 23                                        | Gurion R, Belnik-Plitman Y, Gafter-Gvili A, Paul M, Vidal L, Ben-Bassat I, et al. Colony-stimulating factors for prevention and treatment of infectious complications in patients with acute myelogenous leukemia. <i>Cochrane Database of Systematic Reviews</i> [Internet]. 2012.          |

|     |    |                                                                                                                                                                                                                                                                              |
|-----|----|------------------------------------------------------------------------------------------------------------------------------------------------------------------------------------------------------------------------------------------------------------------------------|
| CSR | 24 | Akl Elie A, Ramly Elie P, Kahale Lara A, Yosuiico Victor ED, Barba M, Sperati F, et al. Anticoagulation for people with cancer and central venous catheters. <i>Cochrane Database of Systematic Reviews</i> [Internet]. 2014.                                                |
| CSR | 25 | Maduwage K, Buckley Nick A, de Silva HJ, Laloo David G, Isbister Geoffrey K. Snake antivenom for snake venom induced consumption coagulopathy. <i>Cochrane Database of Systematic Reviews</i> [Internet]. 2015.                                                              |
| CSR | 26 | Xiao Y, Luo M, Wang J, Luo H. Losigamone add-on therapy for partial epilepsy. <i>Cochrane Database of Systematic Reviews</i> [Internet]. 2012.                                                                                                                               |
| CSR | 27 | Lamers Mieke H, Broekman M, Drenth Joost PH, Gluud C. Aminoadamantanes versus other antiviral drugs for chronic hepatitis C. <i>Cochrane Database of Systematic Reviews</i> [Internet]. 2014.                                                                                |
| CSR | 28 | Elbers Roy G, Verhoef J, van Wegen Erwin EH, Berendse Henk W, Kwakkel G. Interventions for fatigue in Parkinson's disease. <i>Cochrane Database of Systematic Reviews</i> [Internet]. 2015.                                                                                  |
| CSR | 29 | Lodha R, Kabra Sushil K, Pandey Ravindra M. Antibiotics for community-acquired pneumonia in children. <i>Cochrane Database of Systematic Reviews</i> [Internet]. 2013.                                                                                                       |
| CSR | 30 | Thornton J, Rangaraj S. Disease modifying anti-rheumatic drugs in people with cystic fibrosis-related arthritis. <i>Cochrane Database of Systematic Reviews</i> [Internet]. 2012.                                                                                            |
| CSR | 31 | Wong V, Cheuk Daniel KL, Lee S, Chu V. Acupuncture for acute management and rehabilitation of traumatic brain injury. <i>Cochrane Database of Systematic Reviews</i> [Internet]. 2013.                                                                                       |
| CSR | 32 | Li H, Wang J, Li C, Xiao Z. Repetitive transcranial magnetic stimulation (rTMS) for panic disorder in adults. <i>Cochrane Database of Systematic Reviews</i> [Internet]. 2014.                                                                                               |
| CSR | 33 | Allersma T, Farquhar C, Cantineau Astrid EP. Natural cycle in vitro fertilisation (IVF) for subfertile couples. <i>Cochrane Database of Systematic Reviews</i> [Internet]. 2013.                                                                                             |
| CSR | 34 | Johnson N, Bryant A, Miles T, Hogberg T, Cornes P. Adjuvant chemotherapy for endometrial cancer after hysterectomy. <i>Cochrane Database of Systematic Reviews</i> [Internet]. 2011.                                                                                         |
| CSR | 35 | Choo Karen Jui L, Simons FER, Sheikh A. Glucocorticoids for the treatment of anaphylaxis. <i>Cochrane Database of Systematic Reviews</i> [Internet]. 2012.                                                                                                                   |
| CSR | 36 | Ohlsson A, Shah Vibhuti S, Stade Brenda C. Vaginal chlorhexidine during labour to prevent early-onset neonatal group B streptococcal infection. <i>Cochrane Database of Systematic Reviews</i> [Internet]. 2014.                                                             |
| CSR | 37 | Cheng Y, Lu J, Xiong X, Wu S, Lin Y, Wu T, et al. Gases for establishing pneumoperitoneum during laparoscopic abdominal surgery. <i>Cochrane Database of Systematic Reviews</i> [Internet]. 2013.                                                                            |
| CSR | 38 | Zheng J, Fang Y, Cai Bo W, Zhang H, Liu W, Wu B, et al. Intracystic bleomycin for cystic craniopharyngiomas in children. <i>Cochrane Database of Systematic Reviews</i> [Internet]. 2014.                                                                                    |
| CSR | 39 | Tonia T, Mettler A, Robert N, Schwarzer G, Seidenfeld J, Weingart O, et al. Erythropoietin or darbepoetin for patients with cancer. <i>Cochrane Database of Systematic Reviews</i> [Internet]. 2012.                                                                         |
| CSR | 40 | Bricker L, Medley N, Pratt Jeremy J. Routine ultrasound in late pregnancy (after 24 weeks' gestation). <i>Cochrane Database of Systematic Reviews</i> [Internet]. 2015.                                                                                                      |
| CSR | 41 | Lin X, Lu J, Yang M, Dong Bi R, Wu Hong M. Macrolides for diffuse panbronchiolitis. <i>Cochrane Database of Systematic Reviews</i> [Internet]. 2015.                                                                                                                         |
| CSR | 42 | Gurusamy Kurinchi S, Nagendran M, Broadhurst Jack F, Anker Stefan D, Richards T. Iron therapy in anaemic adults without chronic kidney disease. <i>Cochrane Database of Systematic Reviews</i> [Internet]. 2014.                                                             |
| CSR | 43 | Ei Dib R, Gameiro Orsi LF, Ogata Matheus SP, Módolo Norma SP, Braz Leandro G, Jorge Eliane C, et al. Zinc supplementation for the prevention of type 2 diabetes mellitus in adults with insulin resistance. <i>Cochrane Database of Systematic Reviews</i> [Internet]. 2015. |
| CSR | 44 | La Mantia L, Di Pietrantonj C, Rovaris M, Rigon G, Frau S, Berardo F, et al. Interferon-beta versus glatiramer acetate for relapsing-remitting multiple sclerosis. <i>Cochrane Database of Systematic Reviews</i> [Internet]. 2014.                                          |
| CSR | 45 | Zhao S, Sampson S, Xia J, Jayaram Mahesh B. Psychoeducation (brief) for people with serious mental illness. <i>Cochrane Database of Systematic Reviews</i> [Internet]. 2015.                                                                                                 |
| CSR | 46 | Gluud Lise L, Dam G, Les I, Córdoba J, Marchesini G, Borre M, et al. Branched-chain amino acids for people with hepatic encephalopathy. <i>Cochrane Database of Systematic Reviews</i> [Internet]. 2015.                                                                     |
| CSR | 47 | Mason M, Welsh Emma J, Smith I. Drug therapy for obstructive sleep apnoea in adults. <i>Cochrane Database of Systematic Reviews</i> [Internet]. 2013.                                                                                                                        |
| CSR | 48 | Tanaka Y, Nakayama T, Nishimori M, Tsujimura Y, Kawaguchi M, Sato Y. Lidocaine for preventing postoperative sore throat. <i>Cochrane Database of Systematic Reviews</i> [Internet]. 2015.                                                                                    |
| CSR | 49 | Petrucci N, De Feo C. Lung protective ventilation strategy for the acute respiratory distress syndrome. <i>Cochrane Database of Systematic Reviews</i> [Internet]. 2013.                                                                                                     |
| CSR | 50 | Mehrholz J, Kugler J, Pohl M. Locomotor training for walking after spinal cord injury. <i>Cochrane Database of Systematic Reviews</i> [Internet]. 2012.                                                                                                                      |
| CSR | 51 | Xander C, Meerpohl Joerg J, Galandi D, Buroh S, Schwarzer G, Antes G, et al. Pharmacological interventions for pruritus in adult palliative care patients. <i>Cochrane Database of Systematic Reviews</i> [Internet]. 2013.                                                  |
| CSR | 52 | Pammi M, Abrams Steven A. Oral lactoferrin for the treatment of sepsis and necrotizing enterocolitis in neonates. <i>Cochrane Database of Systematic Reviews</i> [Internet]. 2011.                                                                                           |

|     |    |                                                                                                                                                                                                                                                                                                                                                                           |
|-----|----|---------------------------------------------------------------------------------------------------------------------------------------------------------------------------------------------------------------------------------------------------------------------------------------------------------------------------------------------------------------------------|
| CSR | 53 | Eliakim-Raz N, Robenshtok E, Shefet D, Gafter-Gvili A, Vidal L, Paul M, et al. Empiric antibiotic coverage of atypical pathogens for community-acquired pneumonia in hospitalized adults. <i>Cochrane Database of Systematic Reviews</i> [Internet]. 2012.                                                                                                                |
| CSR | 54 | Hsu Charlie CT, Kwan Gigi NC, Thompson Shane A, Evans-Barns H, van Driel Mieke L. Embolisation for pulmonary arteriovenous malformation. <i>Cochrane Database of Systematic Reviews</i> [Internet]. 2015.                                                                                                                                                                 |
| CSR | 55 | Evans Jennifer R, Lawrenson John G. Antioxidant vitamin and mineral supplements for slowing the progression of age-related macular degeneration. <i>Cochrane Database of Systematic Reviews</i> [Internet]. 2012.                                                                                                                                                         |
| CSR | 56 | Stanton Tasha R, Wand Benedict M, Carr Daniel B, Birklein F, Wasner Gunnar L, O'Connell Neil E. Local anaesthetic sympathetic blockade for complex regional pain syndrome. <i>Cochrane Database of Systematic Reviews</i> [Internet]. 2013.                                                                                                                               |
| CSR | 57 | Afshari A, Wikkelsø A, Brok J, Møller Ann M, Wetterslev J. Thrombelaastography (TEG) or thromboelastometry (ROTEM) to monitor haemotherapy versus usual care in patients with massive transfusion. <i>Cochrane Database of Systematic Reviews</i> [Internet]. 2011.                                                                                                       |
| CSR | 58 | Zhou Q, Zheng J, Yu L, Jia X. Pregabalin monotherapy for epilepsy. <i>Cochrane Database of Systematic Reviews</i> [Internet]. 2012.                                                                                                                                                                                                                                       |
| CSR | 59 | Kumbargere Nagraj S, Naresh S, Srinivas K, Renjith George P, Shrestha A, Levenson D, et al. Interventions for the management of taste disturbances. <i>Cochrane Database of Systematic Reviews</i> [Internet]. 2014.                                                                                                                                                      |
| CSR | 60 | Fernandes Ricardo M, Bialy Liza M, Vandermeer B, Tjosvold L, Plint Amy C, Patel H, et al. Glucocorticoids for acute viral bronchiolitis in infants and young children. <i>Cochrane Database of Systematic Reviews</i> [Internet]. 2013.                                                                                                                                   |
| CSR | 61 | Meerpohl Joerg J, Antes G, Rucker G, Fleeman N, Motschall E, Niemyer Charlotte M, et al. Deferasirox for managing iron overload in people with thalassaemia. <i>Cochrane Database of Systematic Reviews</i> [Internet]. 2012.                                                                                                                                             |
| CSR | 62 | Andriolo Brenda NG, Andriolo Régis B, Saconato H, Atallah Álvaro N, Valente O. Early versus late tracheostomy for critically ill patients. <i>Cochrane Database of Systematic Reviews</i> [Internet]. 2015.                                                                                                                                                               |
| CSR | 63 | Magni Laura R, Purgato M, Gastaldon C, Papola D, Furukawa Toshi A, Cipriani A, et al. Fluoxetine versus other types of pharmacotherapy for depression. <i>Cochrane Database of Systematic Reviews</i> [Internet]. 2013.                                                                                                                                                   |
| CSR | 64 | Ricci S, Dinia L, Del Sette M, Anzola P, Mazzoli T, Cenciarelli S, et al. Sonothrombolysis for acute ischaemic stroke. <i>Cochrane Database of Systematic Reviews</i> [Internet]. 2012.                                                                                                                                                                                   |
| CSR | 65 | Fisher Sheila A, Zhang H, Doree C, Mathur A, Martin-Rendon E. Stem cell treatment for acute myocardial infarction. <i>Cochrane Database of Systematic Reviews</i> [Internet]. 2015.                                                                                                                                                                                       |
| CSR | 66 | Daniels T, Mills N, Whitaker P. Nebuliser systems for drug delivery in cystic fibrosis. <i>Cochrane Database of Systematic Reviews</i> [Internet]. 2013.                                                                                                                                                                                                                  |
| CSR | 67 | Sickinger M-T, von Tresckow B, Kobe C, Engert A, Borchmann P, Skoetz N. Positron emission tomography-adapted therapy for first-line treatment in individuals with Hodgkin lymphoma. <i>Cochrane Database of Systematic Reviews</i> [Internet]. 2015.                                                                                                                      |
| CSR | 68 | Kavirajan Harish C, Lueck K, Chuang K. Alternating current cranial electrotherapy stimulation (CES) for depression. <i>Cochrane Database of Systematic Reviews</i> [Internet]. 2014.                                                                                                                                                                                      |
| CSR | 69 | Gupta Aditya K, Paquet M, Villanueva E, Brintnell W. Interventions for actinic keratoses. <i>Cochrane Database of Systematic Reviews</i> [Internet]. 2012.                                                                                                                                                                                                                |
| CSR | 70 | Khasraw M, Ameratunga Malaka S, Grant R, Wheeler H, Pavlakis N. Antiangiogenic therapy for high-grade glioma. <i>Cochrane Database of Systematic Reviews</i> [Internet]. 2014.                                                                                                                                                                                            |
| CSR | 71 | Leucht C, Huhn M, Leucht S. Amitriptyline versus placebo for major depressive disorder. <i>Cochrane Database of Systematic Reviews</i> [Internet]. 2012.                                                                                                                                                                                                                  |
| CSR | 72 | Malanda Uriëll L, Welschen Laura MC, Riphagen Ingrid I, Dekker Jacqueline M, Nijpels G, Bot Sandra DM. Self-monitoring of blood glucose in patients with type 2 diabetes mellitus who are not using insulin. <i>Cochrane Database of Systematic Reviews</i> [Internet]. 2012.                                                                                             |
| CSR | 73 | Povlsen B, Hansson T, Povlsen Sebastian D. Treatment for thoracic outlet syndrome. <i>Cochrane Database of Systematic Reviews</i> [Internet]. 2014.                                                                                                                                                                                                                       |
| CSR | 74 | Hofstede Stefanie N, Nouta Klaas A, Jacobs W, van Hooff Miranda L, Wymenga Ate B, Pijls Bart G, et al. Mobile bearing vs fixed bearing prostheses for posterior cruciate retaining total knee arthroplasty for postoperative functional status in patients with osteoarthritis and rheumatoid arthritis. <i>Cochrane Database of Systematic Reviews</i> [Internet]. 2015. |
| CSR | 75 | Visser J, Snel M, Van Vliet Huib AAM. Hormonal versus non-hormonal contraceptives in women with diabetes mellitus type 1 and 2. <i>Cochrane Database of Systematic Reviews</i> [Internet]. 2013.                                                                                                                                                                          |
| CSR | 76 | Kleinstäuber M, Witthöft M, Steffanowski A, van Marwijk H, Hiller W, Lambert Michael J. Pharmacological interventions for somatoform disorders in adults. <i>Cochrane Database of Systematic Reviews</i> [Internet]. 2014.                                                                                                                                                |
| CSR | 77 | Anderson-James S, Marchant Julie M, Acworth Jason P, Turner C, Chang Anne B. Inhaled corticosteroids for subacute cough in children. <i>Cochrane Database of Systematic Reviews</i> [Internet]. 2013.                                                                                                                                                                     |
| CSR | 78 | Tramm R, Ilic D, Davies Andrew R, Pellegrino Vincent A, Romero L, Hodgson C. Extracorporeal membrane oxygenation for critically ill adults. <i>Cochrane Database of Systematic Reviews</i> [Internet]. 2015.                                                                                                                                                              |

|     |     |                                                                                                                                                                                                                                                                                                                                  |
|-----|-----|----------------------------------------------------------------------------------------------------------------------------------------------------------------------------------------------------------------------------------------------------------------------------------------------------------------------------------|
| CSR | 79  | Scholefield B, Duncan H, Davies P, Gao Smith F, Khan K, Perkins Gavin D, et al. Hypothermia for neuroprotection in children after cardiopulmonary arrest. <i>Cochrane Database of Systematic Reviews</i> [Internet]. 2013.                                                                                                       |
| CSR | 80  | Prabhu Rama KR, Swaminathan N, Harvey Lisa A. Passive movements for the treatment and prevention of contractures. <i>Cochrane Database of Systematic Reviews</i> [Internet]. 2013.                                                                                                                                               |
| CSR | 81  | Kew Kayleigh M, Undela K, Kotortsi I, Ferrara G. Macrolides for chronic asthma. <i>Cochrane Database of Systematic Reviews</i> [Internet]. 2015.                                                                                                                                                                                 |
| CSR | 82  | Segal D, MacDonald John K, Chande N. Low dose naltrexone for induction of remission in Crohn's disease. <i>Cochrane Database of Systematic Reviews</i> [Internet]. 2014.                                                                                                                                                         |
| CSR | 83  | Boonmak P, Boonmak S, Pattanittum P. High initial concentration versus low initial concentration sevoflurane for inhalational induction of anaesthesia. <i>Cochrane Database of Systematic Reviews</i> [Internet]. 2012.                                                                                                         |
| CSR | 84  | Hunt H, Stanworth S, Curry N, Woolley T, Cooper C, Ukoumunne O, et al. Thromboelastography (TEG) and rotational thromboelastometry (ROTEM) for trauma-induced coagulopathy in adult trauma patients with bleeding. <i>Cochrane Database of Systematic Reviews</i> [Internet]. 2015.                                              |
| CSR | 85  | Ells Louisa J, Mead E, Atkinson G, Corpeleijn E, Roberts K, Viner R, et al. Surgery for the treatment of obesity in children and adolescents. <i>Cochrane Database of Systematic Reviews</i> [Internet]. 2015.                                                                                                                   |
| CSR | 86  | Ali A, Hall I, Blickwedel J, Hassiotis A. Behavioural and cognitive-behavioural interventions for outwardly-directed aggressive behaviour in people with intellectual disabilities. <i>Cochrane Database of Systematic Reviews</i> [Internet]. 2015.                                                                             |
| CSR | 87  | Kiwanuka Suzanne N, Rutebemberwa E, Nalwadda C, Okui O, Ssengooba F, Kinengyere Alison A, et al. Interventions to manage dual practice among health workers. <i>Cochrane Database of Systematic Reviews</i> [Internet]. 2011.                                                                                                    |
| CSR | 88  | Vasudev A, Macritchie K, Rao Sanjay NK, Geddes J, Young Allan H. Tiagabine in the maintenance treatment of bipolar disorder. <i>Cochrane Database of Systematic Reviews</i> [Internet]. 2011.                                                                                                                                    |
| CSR | 89  | Daly C, Cody June D, Khan I, Rabindranath Kannaiyan S, Vale L, Wallace Sheila A. Double bag or Y-set versus standard transfer systems for continuous ambulatory peritoneal dialysis in end-stage kidney disease. <i>Cochrane Database of Systematic Reviews</i> [Internet]. 2014.                                                |
| CSR | 90  | Saldanha Ian J, Akinyede O, Robinson Karen A. Immunosuppressive drug therapy for preventing rejection following lung transplantation in cystic fibrosis. <i>Cochrane Database of Systematic Reviews</i> [Internet]. 2013.                                                                                                        |
| CSR | 91  | Bradt J, Dileo C, Shim M. Music interventions for preoperative anxiety. <i>Cochrane Database of Systematic Reviews</i> [Internet]. 2013.                                                                                                                                                                                         |
| CSR | 92  | Jacobs W, Van der Gaag Niels A, Tuschel A, de Kleuver M, Peul W, Verbout AJ, et al. Total disc replacement for chronic back pain in the presence of disc degeneration. <i>Cochrane Database of Systematic Reviews</i> [Internet]. 2012.                                                                                          |
| CSR | 93  | Wakai A, O'Sullivan R, McCabe A. Intra-articular lignocaine versus intravenous analgesia with or without sedation for manual reduction of acute anterior shoulder dislocation in adults. <i>Cochrane Database of Systematic Reviews</i> [Internet]. 2011.                                                                        |
| CSR | 94  | Chang Zhi H, Liu Zhao Y. Subintimal angioplasty for chronic lower limb arterial occlusion. <i>Cochrane Database of Systematic Reviews</i> [Internet]. 2013.                                                                                                                                                                      |
| CSR | 95  | Moja L, Lucenteforte E, Kwag Koren H, Bertele V, Campomori A, Chakravarthy U, et al. Systemic safety of bevacizumab versus ranibizumab for neovascular age-related macular degeneration. <i>Cochrane Database of Systematic Reviews</i> [Internet]. 2014.                                                                        |
| CSR | 96  | Robertson L, Roche A. Primary prophylaxis for venous thromboembolism in people undergoing major amputation of the lower extremity. <i>Cochrane Database of Systematic Reviews</i> [Internet]. 2013.                                                                                                                              |
| CSR | 97  | Magula N, Dedicat M. Low dose versus high dose stavudine for treating people with HIV infection. <i>Cochrane Database of Systematic Reviews</i> [Internet]. 2015.                                                                                                                                                                |
| CSR | 98  | Ghamami N, Chiang Sandy Hsiang Y, Dormuth C, Wright James M. Time course for blood pressure lowering of dihydropyridine calcium channel blockers. <i>Cochrane Database of Systematic Reviews</i> [Internet]. 2014.                                                                                                               |
| SR  | 99  | Sculean A, Nikolidakis D, Nikou G, Ivanovic A, Chapple ILC, Stavropoulos A. Biomaterials for promoting periodontal regeneration in human intrabony defects: a systematic review. <i>Periodontology</i> 2000. 2015;68(1):182-216.                                                                                                 |
| SR  | 100 | Bright R, Hynes K, Gronthos S, Bartold PM. Periodontal ligament-derived cells for periodontal regeneration in animal models: a systematic review. <i>Journal Of Periodontal Research</i> . 2015;50(2):160-72.                                                                                                                    |
| SR  | 101 | Hernandez AV, Usmani A, Rajamanickam A, Moheet A. Thiazolidinediones and risk of heart failure in patients with or at high risk of type 2 diabetes mellitus: A meta-analysis and meta-regression analysis of placebo-controlled randomized clinical trials. <i>American Journal of Cardiovascular Drugs</i> . 2011;11(2):115-28. |
| SR  | 102 | Valery PC, Moore SP, Meiklejohn J, Bray F. International variations in childhood cancer in indigenous populations: A systematic review. <i>The Lancet Oncology</i> . 2014;15(2):e90-103.                                                                                                                                         |
| SR  | 103 | Kim SH, Stoicea N, Soghomonyan S, Bergese SD. Remifentanyl-Acute opioid tolerance and opioid-induced hyperalgesia: A systematic review. <i>American Journal of Therapeutics</i> . 2015;22(3):e62-e74.                                                                                                                            |

|    |     |                                                                                                                                                                                                                                                                                                                                                                                 |
|----|-----|---------------------------------------------------------------------------------------------------------------------------------------------------------------------------------------------------------------------------------------------------------------------------------------------------------------------------------------------------------------------------------|
| SR | 104 | Xiao X, Li L, Feng Y, Jiang YS, He QW, Tan XG, et al. Sevoflurane in the anesthesia of child short period surgery: A systematic review. <i>Chinese Journal of Evidence-Based Medicine</i> . 2011;11(10):1184-91.                                                                                                                                                                |
| SR | 105 | Ranjan A, Penninga E, Jelsig AM, Hasselbalch HC, Bjerrum OW. Inheritance of the chronic myeloproliferative neoplasms. A systematic review. <i>Clinical Genetics</i> . 2013;83(2):99-107.                                                                                                                                                                                        |
| SR | 106 | Usenbo A, Kramer V, Young T, Musekiwa A. Prevalence of arthritis in Africa: A systematic review and meta-analysis. <i>PLoS ONE</i> . 2015;10(8).                                                                                                                                                                                                                                |
| SR | 107 | Siebert W. Adhesions after previous cesarean section. Meta-analysis and systematic review. <i>Gynakologische Praxis</i> . 2012;36(2):336.                                                                                                                                                                                                                                       |
| SR | 108 | Drake MT, Murad MH, Mauck KF, Lane MA, Undavalli C, Elraiyah T, et al. Risk factors for low bone mass-related fractures in men: A systematic review and meta-analysis. <i>Journal of Clinical Endocrinology and Metabolism</i> . 2012;97(6):1861-70.                                                                                                                            |
| SR | 109 | Butler EN, Chawla N, Lund J, Harlan LC, Warren JL, Yabroff KR. Patterns of colorectal cancer care in the United States and Canada: A systematic review. <i>Journal of the National Cancer Institute</i> . 2013. p. 13-35.                                                                                                                                                       |
| SR | 110 | Montin L, Koivisto JM. Effectiveness of self-directed learning methods compared with other learning methods in nursing education related to nursing students' or registered nurses' learning outcomes: A systematic review protocol. <i>JBI Database of Systematic Reviews and Implementation Reports</i> . 2014;12(2):1-8.                                                     |
| SR | 111 | Jindal A, Bal A, Agarwal R. Inflammatory myofibroblastic tumor of the trachea in the pediatric age group: Case report and systematic review of the literature. <i>Journal of Bronchology and Interventional Pulmonology</i> . 2015;22(1):58-65.                                                                                                                                 |
| SR | 112 | Baldwin C, Brusco NK. The effect of vocational rehabilitation on return-to-work rates post stroke: A systematic review. <i>Topics in Stroke Rehabilitation</i> . 2011;18(5):562-72.                                                                                                                                                                                             |
| SR | 113 | Sundar S, Wu J, Hillaby K, Yap J, Lilford R. A systematic review evaluating the relationship between progression free survival and post progression survival in advanced ovarian cancer. <i>Gynecologic Oncology</i> . 2012;125(2):493-9.                                                                                                                                       |
| SR | 114 | Detjen AK, DiNardo AR, Leyden J, Steingart KR, Menzies D, Schiller I, et al. Xpert MTB/RIF for the diagnosis of tuberculosis in children-a systematic review and meta-analysis. <i>American Journal of Tropical Medicine and Hygiene</i> . 2013;89(5):418-9.                                                                                                                    |
| SR | 115 | Bellemain-Appaix A, O'Connor SA, Silvain J, Cucherat M, Beygui F, Barthélémy O, et al. Association of clopidogrel pretreatment with mortality, cardiovascular events, and major bleeding among patients undergoing percutaneous coronary intervention: A systematic review and meta-analysis. <i>JAMA - Journal of the American Medical Association</i> . 2012;308(23):2507-17. |
| SR | 116 | Liese J, Ulrich F, Schreckenbach T, Wahle M, Zeuzem S, Bechstein WO, et al. A rare cause of acute liver failure: Adult onset still's disease-case report and systematic review of the literature. <i>Transplant International</i> . 2011;24:237.                                                                                                                                |
| SR | 117 | Davie A, Damera V, Bianic F, Ricci J, Bernhardt P, Gokhale S, et al. CNI-related renal impairment in liver transplantation: A comparison of cyclosporine and tacrolimus-based regimens. <i>American Journal of Transplantation</i> . 2013;13:533.                                                                                                                               |
| SR | 118 | Loar J. Diagnostic accuracy and radiation dose of CT coronary angiography in atrial fibrillation: Systematic review and meta-analysis: Vorre MM, Abdulla J. <i>Radiology</i> 2013;267:376-86. <i>Journal of Emergency Medicine</i> . 2013;45(2):308.                                                                                                                            |
| SR | 119 | Sharma V, Deo SV, Altarabsheh SE, Cho YH, Erwin PJ, Park SJ. Comparison of the early haemodynamics of stented pericardial and porcine aortic valves. <i>European Journal of Cardio-thoracic Surgery</i> . 2014;47(1):4-10.                                                                                                                                                      |
| SR | 120 | Van Tuyl LH, Lems WF, Boers M. Measurement of stiffness in patients with rheumatoid arthritis in low disease activity or remission: A systematic review. <i>BMC Musculoskeletal Disorders</i> . 2014;15(1).                                                                                                                                                                     |
| SR | 121 | Shumay D, Del Gaudio F, Melisko M, Dunn L. Factors related to fear of recurrence in breast cancer survivors. <i>Psycho-Oncology</i> . 2013;22:134.                                                                                                                                                                                                                              |
| SR | 122 | Rawlinson A, Kitchingham N, Hart C, McMahon G, Ong SL, Khanna A. Mechanisms of reducing postoperative pain, nausea and vomiting: A systematic review of current techniques. <i>Evidence-Based Medicine</i> . 2012;17(3):75-80.                                                                                                                                                  |
| SR | 123 | Chen L, Xiao-Qing Z, Qin L, Hong W. Influencing factors related to sun protection in children and adolescents: A systematic review. <i>Chinese Journal of Evidence-Based Medicine</i> . 2014;14(12):1429-33.                                                                                                                                                                    |
| SR | 124 | Qin SY, Jiang HX, Ning HJ, Nie HM, Tao L, Hu BL, et al. Effect of Helicobacter pylori eradication on blood ammonia levels in cirrhotic patients: A systematic review. <i>Hepato-Gastroenterology</i> . 2012;59(120):2576-81.                                                                                                                                                    |
| SR | 125 | Müller SA, Vavken P, Pagenstert G. Simulated activity but real trauma: A systematic review on nintendo wii injuries based on a case report of an acute anterior cruciate ligament rupture. <i>Medicine (United States)</i> . 2015;94(12):e648.                                                                                                                                  |
| SR | 126 | Kim S-H, Lilot M, Sidhu KS, Rinehart J, Yu Z, Canales C, et al. Accuracy and precision of continuous noninvasive arterial pressure monitoring compared with invasive arterial pressure: a systematic review and meta-analysis. <i>Anesthesiology</i> . 2014;120(5):1080-97.                                                                                                     |
| SR | 127 | Nickerson JW, Chackungal S, Knowlton L, McQueen K, Burkle FM. Surgical care during humanitarian crises: a systematic review of published surgical caseload data from foreign medical teams. <i>Prehospital And Disaster Medicine</i> . 2012;27(2):184-9.                                                                                                                        |
| SR | 128 | Zulman DM, Sussman JB, Chen X, Cigolle CT, Blaum CS, Hayward RA. Examining the evidence: A systematic review of the inclusion and analysis of older adults in randomized controlled trials. <i>Journal of General Internal Medicine</i> . 2011;26(7):783-90.                                                                                                                    |
| SR | 129 | Singh S, Venkatesh SK, Wang Z, Miller FH, Motosugi U, Low RN, et al. Diagnostic performance of magnetic resonance elastography in staging liver fibrosis: A systematic                                                                                                                                                                                                          |

|    |     |                                                                                                                                                                                                                                                                                                                              |
|----|-----|------------------------------------------------------------------------------------------------------------------------------------------------------------------------------------------------------------------------------------------------------------------------------------------------------------------------------|
|    |     | review and meta-analysis of individual participant data. <i>Clinical Gastroenterology and Hepatology</i> . 2015;13(3):440-51.                                                                                                                                                                                                |
| SR | 130 | Hergan D, Thut D, Sherman O, Day MS. Meniscal allograft transplantation. <i>Arthroscopy - Journal of Arthroscopic and Related Surgery</i> . 2011;27(1):101-12.                                                                                                                                                               |
| SR | 131 | Gong Z, Zhao D. Cardiovascular diseases and risk factors among Chinese immigrants. <i>Internal And Emergency Medicine</i> . 2015.                                                                                                                                                                                            |
| SR | 132 | Jordan SJ, Nagle CM, Coory MD, Maresco D, Protani MM, Pandeya NA, et al. Has the association between hysterectomy and ovarian cancer changed over time? A systematic review and meta-analysis. <i>European Journal of Cancer</i> . 2013;49(17):3638-47.                                                                      |
| SR | 133 | Lalidou F, Kolios G, Tavidou A, Drosos GI. Bone grafts as carriers for local antibiotic delivery for the treatment and prevention of bone infections. <i>Surgical Technology International</i> . 2014;25:239-45.                                                                                                             |
| SR | 134 | Cheng S, Grasso L, Martinez-Orozco JA, Al-Agha R, Pivonello R, Colao A, et al. Pregnancy in acromegaly: Experience from two referral centers and systematic review of the literature. <i>Clinical Endocrinology</i> . 2012;76(2):264-71.                                                                                     |
| SR | 135 | Wu F, Weng S, Li C, Sun J, Li L, Gao Q. Submandibular gland transfer for the prevention of postirradiation xerostomia in patients with head and neck cancer: A systematic review and meta-analysis. <i>ORL</i> . 2015;77(2):70-86.                                                                                           |
| SR | 136 | Torné R, Rodríguez-Hernández A, Bernard T, Arikán Abelló F, Vilalta Castan J, Sahuquillo J. Subarachnoid hemorrhage in systemic lupus erythematosus: Systematic review and report of three cases. <i>Clinical Neurology and Neurosurgery</i> . 2015;128:17-24.                                                               |
| SR | 137 | Jokiniemi K, Pietilä A-M, Kylmä J, Haatainen K. Advanced nursing roles: a systematic review. <i>Nursing &amp; Health Sciences</i> . 2012;14(3):421-31.                                                                                                                                                                       |
| SR | 138 | Gerstner D, Walsler S, Brenner B, Bünger J, Eikmann T, Raulf-Heimsoth M, et al. Health relevance of exposure to bioaerosols. <i>Allergologie</i> . 2014;37(5):190-7.                                                                                                                                                         |
| SR | 139 | Kurth E, Kennedy HP, Spichiger E, Hösl I, Zemp Stutz E. Crying babies, tired mothers: What do we know? A systematic review. <i>Midwifery</i> . 2011;27(2):187-94.                                                                                                                                                            |
| SR | 140 | Cook DA, Brydges R, Zendejas B, Hamstra SJ, Hatala R. Technology-enhanced simulation to assess health professionals: A systematic review of validity evidence, research methods, and reporting quality. <i>Academic Medicine</i> . 2013;88(6):872-83.                                                                        |
| SR | 141 | Xia L, Wang X, Xu T, Zhang X, Zhu Z, Qin L, et al. Robotic versus open radical cystectomy: An updated systematic review and meta-analysis. <i>PLoS ONE</i> . 2015;10(3).                                                                                                                                                     |
| SR | 142 | Taylor RS, Desai MJ, Rigoard P, Taylor RJ. Predictors of pain relief following spinal cord stimulation in chronic back and leg pain and failed back surgery syndrome: A systematic review and meta-regression analysis. <i>Pain Practice</i> . 2014;14(6):489-505.                                                           |
| SR | 143 | Manouchehri N, Birch DW, Shi X, Hadi G, Karmali S. Heated versus cold insufflation for minimally invasive abdominal surgery has minimal benefit on patient outcomes. <i>Surgical Endoscopy and Other Interventional Techniques</i> . 2011;25:S346.                                                                           |
| SR | 144 | Chiappini E, Accetta G, Bonsignori F, Boddp V, Galli L, Biggeri A, et al. Interferon-γ release assays for the diagnosis of mycobacterium tuberculosis infection in children: A systematic review and meta-analysis. <i>International Journal of Immunopathology and Pharmacology</i> . 2012;25(3):557-64.                    |
| SR | 145 | Carson SJ. Limited evidence for existing caries assessment systems. <i>Evidence-Based Dentistry</i> . 2013;14(1):10-1.                                                                                                                                                                                                       |
| SR | 146 | Siriwardhana C, Ali SS, Roberts B, Stewart R. A systematic review of resilience and mental health outcomes of conflict-driven adult forced migrants. <i>Conflict And Health</i> . 2014;8:13.                                                                                                                                 |
| SR | 147 | Chamberlain C, McNamara B, Williams ED, Yore D, Oldenburg B, Oats J, et al. Diabetes in pregnancy among indigenous women in australia, canada, new zealand and the united states: A systematic review of the evidence for screening in early pregnancy. <i>Diabetes/Metabolism Research and Reviews</i> . 2013;29(4):241-56. |
| SR | 148 | Leadley RM, Armstrong N, Lee YC, Allen A, Kleijnen J. Chronic diseases in the European Union: The prevalence and health cost implications of chronic pain. <i>Journal of Pain and Palliative Care Pharmacotherapy</i> . 2012;26(4):310-25.                                                                                   |
| SR | 149 | Xiangjun K. To ensure all ward 22a patients on atypical antipsychotics are monitored according to protocol. <i>Annals of the Academy of Medicine Singapore</i> . 2012;41(9):S181.                                                                                                                                            |
| SR | 150 | Weatherley ND, Jackson PR. The new Sheffield risk and benefit tables for the elderly. <i>QJM</i> . 2011;104(1):3-12.                                                                                                                                                                                                         |
| SR | 151 | Srigley JA, Lightfoot D, Fernie G, Gardam M, Muller MP. Hand hygiene monitoring technology: protocol for a systematic review. <i>Systematic reviews</i> . 2013;2:101.                                                                                                                                                        |
| SR | 152 | Morgan JL, Thomas K, Braungart S, Nelson RL. Transparent cap colonoscopy versus standard colonoscopy: A systematic review and meta-analysis. <i>Techniques in Coloproctology</i> . 2013;17(4):353-60.                                                                                                                        |
| SR | 153 | Hahn A, Jochai D, Caufield-Noll C, Rios R, Allen L, Cordts G. Self inflicted burns: A systematic review of the literature. <i>Journal of Burn Care and Research</i> . 2012;33(2):S181.                                                                                                                                       |
| SR | 154 | <i>Canadian Respiratory Journal</i> . 2013;20(2).                                                                                                                                                                                                                                                                            |
| SR | 155 | Dawe SR, Windsor JA, Broeders JAJL, Cregan PC, Hewett PJ, Maddern GJ. A systematic review of surgical skills transfer after simulation-based training: Laparoscopic cholecystectomy and endoscopy. <i>Annals of Surgery</i> . 2014;259(2):236-48.                                                                            |
| SR | 156 | Xiong C, Liu G, Ma R, Xue J, Wu A. Efficacy of palonosetron for preventing postoperative nausea and vomiting: a systematic review and meta-analysis. <i>Canadian Journal of Anesthesia</i> . 2015.                                                                                                                           |
| SR | 157 | O'Horo JC, Silva GLM, Silvia Munoz-Price L, Safdar N. The efficacy of daily bathing with chlorhexidine for reducing healthcare-associated bloodstream infections: A meta-analysis. <i>Infection Control and Hospital Epidemiology</i> . 2012;33(3):257-67.                                                                   |

|    |     |                                                                                                                                                                                                                                                                              |
|----|-----|------------------------------------------------------------------------------------------------------------------------------------------------------------------------------------------------------------------------------------------------------------------------------|
| SR | 158 | Rehm J, Kailasapillai S, Larsen E, Rehm MX, Samokhvalov AV, Shield KD, et al. A systematic review of the epidemiology of unrecorded alcohol consumption and the chemical composition of unrecorded alcohol. <i>Addiction (Abingdon, England)</i> . 2014;109(6):880-93.       |
| SR | 159 | Schadewaldt V, McInnes E, Hiller JE, Gardner A. Views and experiences of nurse practitioners and medical practitioners with collaborative practice in primary health care - an integrative review. <i>BMC Family Practice</i> . 2013;14:132-.                                |
| SR | 160 | Hao Z, Yang C, Liu M, Wu B. Renal dysfunction and thrombolytic therapy in patients with acute ischemic stroke: A systematic review and meta-analysis. <i>Medicine (United States)</i> . 2014;93(28):e286.                                                                    |
| SR | 161 | Kishi T, Matsunaga S, Iwata N. Suvorexant for primary insomnia: A systematic review and meta-analysis of randomized placebo-controlled trials. <i>PLoS ONE</i> . 2015;10(8).                                                                                                 |
| SR | 162 | Jones CJ, Smith HE, Llewellyn CD. A systematic review of the effectiveness of interventions using the Common Sense Self-Regulatory Model to improve adherence behaviours. <i>Journal Of Health Psychology</i> . 2015.                                                        |
| SR | 163 | White A. Outpatient interventions for hepatology patients with fluid retention: a review and synthesis of the literature. <i>Gastroenterology Nursing: The Official Journal Of The Society Of Gastroenterology Nurses And Associates</i> . 2014;37(3):236-44.                |
| SR | 164 | Williams M, Lewis L, McKeough Z, Holland A, Lee A, McNamara R, et al. Association between exercise session attendance and improvements in exercise outcomes in people with COPD. <i>Respirology</i> . 2013;18:56.                                                            |
| SR | 165 | Heck E, Jaworska N, DeSomma E, Dhoopar AS, MacMaster FP, Dewey D, et al. A survey of mental health services at post-secondary institutions in Alberta. <i>Canadian Journal of Psychiatry</i> . 2014;59(5):250-8.                                                             |
| SR | 166 | Renzaho AMN, Romios P, Crock C, Sønderlund AL. The effectiveness of cultural competence programs in ethnic minority patientcentered health care-a systematic review of the literature. <i>International Journal for Quality in Health Care</i> . 2013;25(3):261-9.           |
| SR | 167 | Soong JL, Lim WH. Vasopressin and terlipressin in the treatment of vasodilatory septic shock: A systematic review. <i>Proceedings of Singapore Healthcare</i> . 2011;20(3):208-18.                                                                                           |
| SR | 168 | Sexton CE, Betts JF, Demnitz N, Dawes H, Ebmeier KP, Johansen-Berg H. A systematic review of MRI studies examining the relationship between physical fitness and activity and the white matter of the ageing brain. <i>Neuroimage</i> . 2015.                                |
| SR | 169 | Foroozan M, Beauchet A, Funck-Brentano E, Sei JF, Saiag P. Current evidence on recurrence rate of basal cell and squamous cell carcinomas treated by Mohs micrographic surgery: Systematic review. <i>Journal of the American Academy of Dermatology</i> . 2014;70(5):AB195. |
| SR | 170 | Zhang Q, Li J, Liu F, Li Z. Comments on Li H et al. "A systematic review of matrix metalloproteinase 9 as a biomarker of survival in patients with osteosarcoma". <i>Tumor Biology</i> . 2014;36(1):5-6.                                                                     |
| SR | 171 | Coghill D, Banaschewski T, Zuddas A, Pelaz A, Gagliano A, Doepfner M. Long-acting methylphenidate formulations in the treatment of attention-deficit/hyperactivity disorder: A systematic review of head-to-head studies. <i>BMC Psychiatry</i> . 2013;13.                   |
| SR | 172 | Sacchetti M, Mantelli F, Lambiase A, Mastropasqua A, Merlo D, Bonini S. Systematic review of randomised clinical trials on topical ciclosporin a for the treatment of dry eye disease. <i>British Journal of Ophthalmology</i> . 2014;98(8):1016-22.                         |
| SR | 173 | Cramer JA, Sapin C, François C. Indirect comparison of clobazam and other therapies for Lennox-Gastaut syndrome. <i>Acta Neurologica Scandinavica</i> . 2013;128(2):91-9.                                                                                                    |
| SR | 174 | Rueda-Ochoa OL, Munoz-Suarez D, Calvo-Betancourt L, Lopez E, Vargas C, Delgado M, et al. Heart rate variability as a prognostic marker of mortality in patients with myocardial infarction systematic review and meta-analysis. <i>Europace</i> . 2012;14:iv31.              |
| SR | 175 | Hatfield G, Hammond C, Hunt MA. Clinical tests of balance in the knee osteoarthritis population: A systematic review. <i>Osteoarthritis and Cartilage</i> . 2015;23:A374.                                                                                                    |
| SR | 176 | Christopher N, Mehta N, Sinert R. Systematic review: Lung ultrasound for the diagnosis of pneumonia in the emergency department. <i>Academic Emergency Medicine</i> . 2014;21(5):S36.                                                                                        |
| SR | 177 | Nettis E, Delle Donne P, Di Leo E, Calogiuri GF, Ferrannini A, Vacca A. Rupatadine for the treatment of urticaria. <i>Expert Opinion on Pharmacotherapy</i> . 2013;14(13):1807-13.                                                                                           |
| SR | 178 | Zeiler FA, Zeiler KJ, Teitelbaum J, Gillman LM, West M. VNS for refractory status epilepticus. <i>Epilepsy Research</i> . 2015;112:100-13.                                                                                                                                   |
| SR | 179 | Sofaer N, Strech D. The need for systematic reviews of reasons. <i>Bioethics</i> . 2012;26(6):315-28.                                                                                                                                                                        |
| SR | 180 | Leclère C, Viaux S, Avril M, Achard C, Chetouani M, Missonnier S, et al. Why synchrony matters during mother-child interactions: A systematic review. <i>PLoS ONE</i> . 2014;9(12).                                                                                          |
| SR | 181 | Patel V, Patel P, Dawson J. Comment on: Non-infectious pulmonary toxicity of rituximab: A systematic review. <i>Rheumatology (United Kingdom)</i> . 2012;51(11):2111-2.                                                                                                      |
| SR | 182 | O'Sullivan KE, Hurley ET, Segurado R, Sugrue D, Hurley JP. Transaortic TAVI is a valid alternative to transapical approach. <i>Journal of Cardiac Surgery</i> . 2015;30(5):381-90.                                                                                           |
| SR | 183 | Tseng S-H, Chen H-C, Tam K-W. Systematic review and meta-analysis of the effect of equine assisted activities and therapies on gross motor outcome in children with cerebral palsy. <i>Disability And Rehabilitation</i> . 2013;35(2):89-99.                                 |
| SR | 184 | Jayakrishnan TT, Groeschl RT, George B, Thomas JP, Pappas S, Gamblin TC, et al. Management of acute cholecystitis in cancer patients: A comparative effectiveness approach. <i>Surgical Endoscopy and Other Interventional Techniques</i> . 2014;28(5):1505-14.              |
| SR | 185 | Alves GS, Oertel Knöchel V, Knöchel C, Carvalho AF, Pantel J, Engelhardt E, et al. Integrating retrogenesis theory to alzheimer's disease pathology: Insight from DTI-TBSS                                                                                                   |

|    |     |                                                                                                                                                                                                                                                                                                                                                                                                                                                                       |
|----|-----|-----------------------------------------------------------------------------------------------------------------------------------------------------------------------------------------------------------------------------------------------------------------------------------------------------------------------------------------------------------------------------------------------------------------------------------------------------------------------|
|    |     | investigation of the white matter microstructural integrity. <i>BioMed Research International</i> . 2015;2015.                                                                                                                                                                                                                                                                                                                                                        |
| SR | 186 | Huster KM, Müller A, Prohn MJ, Nowak D, Herbig B. Medical risks in older pilots: a systematic review on incapacitation and age. <i>International archives of occupational and environmental health</i> . 2014;87(6):567-78.                                                                                                                                                                                                                                           |
| SR | 187 | Alcaraz A, González-Zuelgaray J, Augustovski F. Cost-effectiveness of cardioverter defibrillators in patients with risk factors for sudden death in Argentina. <i>Value in Health</i> . 2011;14(5 SUPPL.):S33-S8.                                                                                                                                                                                                                                                     |
| SR | 188 | Lopez A, Billioud V, Peyrin-Biroulet C, Peyrin-Biroulet L. Adherence to anti-TNF therapy in inflammatory bowel diseases: A systematic review. <i>Inflammatory Bowel Diseases</i> . 2013;19(7):1528-33.                                                                                                                                                                                                                                                                |
| SR | 189 | Khan M, Wendel C, Thai H, Movahed M. Failed percutaneous recanalization of chronic total occlusion is associated with higher in-hospital mortality: A systematic review and meta-analysis of the literature. <i>Catheterization and Cardiovascular Interventions</i> . 2013;81:S33-S4.                                                                                                                                                                                |
| SR | 190 | Neville CE, McKinley MC, Holmes VA, Spence D, Woodside JV. The relationship between breastfeeding and postpartum weight change-a systematic review and critical evaluation. <i>International Journal of Obesity</i> . 2014;38(4):577-90.                                                                                                                                                                                                                              |
| SR | 191 | Hawley G, Janamian T, Jackson C, Wilkinson SA. In a maternity shared-care environment, what do we know about the paper hand-held and electronic health record: A systematic literature review. <i>BMC Pregnancy and Childbirth</i> . 2014;14(1).                                                                                                                                                                                                                      |
| SR | 192 | Raja FA, Counsell N, Colombo N, Pfisterer J, du Bois A, Parmar MK, et al. Platinum versus platinum-combination chemotherapy in platinum-sensitive recurrent ovarian cancer: A meta-analysis using individual patient data. <i>Annals of Oncology</i> . 2013;24(12):3028-34.                                                                                                                                                                                           |
| SR | 193 | Lipka S, Rabbanifard R, Kumar A, Brady P. Single versus double balloon enteroscopy for small bowel diagnostics: A systematic review and meta-analysis. <i>Journal of Clinical Gastroenterology</i> . 2015;49(3):177-84.                                                                                                                                                                                                                                               |
| SR | 194 | Wilhelm B, Rajić A, Greig JD, Waddell L, Harris J. The effect of Hazard analysis critical control point programs on microbial contamination of carcasses in abattoirs: A systematic review of published data. <i>Foodborne Pathogens and Disease</i> . 2011;8(9):949-60.                                                                                                                                                                                              |
| SR | 195 | Hurst KV, Lee R, Milosevic I, Handa A. Re: 'Efficacy and Safety of the New Oral Anticoagulants Dabigatran, Rivaroxaban, Apixaban, and Edoxaban in the Treatment and Secondary Prevention of Venous Thromboembolism: A Systematic Review and Meta-analysis of Phase III Trials'- Key Learning Points for Surgeons. <i>European Journal Of Vascular And Endovascular Surgery: The Official Journal Of The European Society For Vascular Surgery</i> . 2015;50(1):126-7. |
| SR | 196 | Antony AK, Hootnick JL, Antony AK. Ulnar forearm free flaps in head and neck reconstruction: systematic review of the literature and a case report. <i>Microsurgery</i> . 2014;34(1):68-75.                                                                                                                                                                                                                                                                           |
| SR | 197 | Pantelic M, Shenderovich Y, Cluver L, Boyes M. Predictors of internalised HIV-related stigma: a systematic review of studies in sub-Saharan Africa. <i>Health Psychology Review</i> . 2015:1-22.                                                                                                                                                                                                                                                                      |
| SR | 198 | Zhang Z, Xu J, Yao Y, Chu S, Cheng H, Chen D, et al. Giant cell tumors of the skull: A series of 18 cases and review of the literature. <i>Journal of Neuro-Oncology</i> . 2013;115(3):437-44.                                                                                                                                                                                                                                                                        |
| SR | 199 | Freedman OC, Fletcher GG, Gandhi S, Mates M, Dent SF, Trudeau ME, et al. Adjuvant endocrine therapy for early breast cancer: A systematic review of the evidence for the 2014 cancer care Ontario systemic therapy guideline. <i>Current Oncology</i> . 2015;22:S95-S113.                                                                                                                                                                                             |
| SR | 200 | Carr HJ, McDermott A, Tadbiri H, Uebbing AM, Londrigan M. The effectiveness of computer-based learning in hospitalized adults with heart failure on knowledge, re-admission, self-care, quality of life and patient satisfaction: A systematic review. <i>JBI Database of Systematic Reviews and Implementation Reports</i> . 2014;12(5):430-65.                                                                                                                      |
| SR | 201 | Frank M, Mittendorf T. Influence of pharmacogenomic profiling prior to pharmaceutical treatment in metastatic colorectal cancer on cost effectiveness: A systematic review. <i>PharmacoEconomics</i> . 2013;31(3):215-28.                                                                                                                                                                                                                                             |
| SR | 202 | Do Nascimento FV, Piccoli V, Beer MA, Von Frankenberg AD, Crispim D, Gerchman F. Association of HSD11B1 polymorphic variants and adipose tissue gene expression with metabolic syndrome, obesity and type 2 diabetes mellitus: A systematic review. <i>Diabetology and Metabolic Syndrome</i> . 2015;7(1).                                                                                                                                                            |
| SR | 203 | McKay AJ, Mahesh PA, Fordham JZ, Majeed A. Prevalence of COPD in India: A systematic review. <i>Primary Care Respiratory Journal</i> . 2012;21(3):313-21.                                                                                                                                                                                                                                                                                                             |
| SR | 204 | Córdoba-Soriano JG, Puri R, Amat-Santos I, Ribeiro HB, Abdul-Jawad Altisent O, del Trigo M, et al. Valve thrombosis following transcatheter aortic valve implantation: a systematic review. <i>Revista Española De Cardiología (English Ed)</i> . 2015;68(3):198-204.                                                                                                                                                                                                 |
| SR | 205 | Tan A, Tan DT, Tan X-W, Mehta JS. Osteo-odonto keratoprosthesis: systematic review of surgical outcomes and complication rates. <i>The Ocular Surface</i> . 2012;10(1):15-25.                                                                                                                                                                                                                                                                                         |
| SR | 206 | Sommerville EW, Chinnery PF, Gorman GS, Taylor RW. Genotypic and phenotypic heterogeneity in adult-onset progressive external ophthalmoplegia (PEO) with mitochondrial DNA instability: A systematic review. <i>Neuromuscular Disorders</i> . 2014;24:S15.                                                                                                                                                                                                            |
| SR | 207 | Lippi G, Mattiuzzi C, Franchini M. Sleep apnea and venous thromboembolism. A systematic review. <i>Thrombosis And Haemostasis</i> . 2015;114(4).                                                                                                                                                                                                                                                                                                                      |



|    |     |                                                                                                                                                                                                                                                                                                                                                                |
|----|-----|----------------------------------------------------------------------------------------------------------------------------------------------------------------------------------------------------------------------------------------------------------------------------------------------------------------------------------------------------------------|
| SR | 208 | Van Loo HM, de Jonge P, Romeijn J-W, Kessler RC, Schoevers RA. Data-driven subtypes of major depressive disorder: a systematic review. <i>BMC Medicine</i> . 2012;10:156-.                                                                                                                                                                                     |
| SR | 209 | Kriza C, Emmert M, Wahlster P, Niederländer C, Kolominsky-Rabas P. A comparison of the main cost-effectiveness drivers of virtual colonography versus conventional colonoscopy for colorectal cancer screening: An international review. <i>Annals of Oncology</i> . 2013;24:iv120.                                                                            |
| SR | 210 | De Ruijter RAG, Stegenga B, Schaub RMH, Reneman MF, Middel B. Determinants of physical and mental health complaints in dentists: a systematic review. <i>Community Dentistry And Oral Epidemiology</i> . 2015;43(1):86-96.                                                                                                                                     |
| SR | 211 | Leitmeyer K. European risk assessment guidance for infectious diseases transmitted on aircraft--the RAGIDA project. <i>Euro Surveillance: Bulletin Européen Sur Les Maladies Transmissibles = European Communicable Disease Bulletin</i> . 2011;16(16).                                                                                                        |
| SR | 212 | Fitzharris M, Yu J, Hammond N, Taylor C, Wu Y, Finfer S, et al. Injury in China: A systematic review of injury surveillance studies conducted in Chinese hospital emergency departments. <i>BMC Emergency Medicine</i> . 2011;11.                                                                                                                              |
| SR | 213 | Linhares AC, Stupka JA, Ciapponi A, Bardach AE, Glujovsky D, Aruj PK, et al. Burden and typing of rotavirus group A in Latin America and the Caribbean: Systematic review and meta-analysis. <i>Reviews in Medical Virology</i> . 2011;21(2):89-109.                                                                                                           |
| SR | 214 | Billeci L, Sicca F, Maharatna K, Apicella F, Narzisi A, Campatelli G, et al. On the application of Quantitative EEG for characterizing autistic brain: A systematic review. <i>Frontiers in Human Neuroscience</i> . 2013(JUL).                                                                                                                                |
| SR | 215 | Sendt KV, Tracy DK, Bhattacharyya S. A systematic review of factors influencing adherence to antipsychotic medication in schizophrenia-spectrum disorders. <i>Psychiatry Research</i> . 2015;225(1-2):14-30.                                                                                                                                                   |
| SR | 216 | Johnson RF, Gustin J. Acute renal failure requiring renal replacement therapy in the intensive care unit: Impact on prognostic assessment for shared decision making. <i>Journal of Palliative Medicine</i> . 2011;14(7):883-9.                                                                                                                                |
| SR | 217 | Wang H, Chen T, Wang H, Song Y, Li X, Wang J. A systematic review of the physiological and operative severity score for the enUmeration of mortality and morbidity and its Portsmouth modification as predictors of post-operative morbidity and mortality in patients undergoing pancreatic surgery. <i>American Journal of Surgery</i> . 2013;205(4):466-72. |
| SR | 218 | Bose H. Role of occupational therapy in dysphagia management for children with special needs. <i>Archives of Physical Medicine and Rehabilitation</i> . 2013;94(10):e60.                                                                                                                                                                                       |
| SR | 219 | Cervero RM, Gaines JK. The impact of CME on physician performance and patient health outcomes: an updated synthesis of systematic reviews. <i>The Journal Of Continuing Education In The Health Professions</i> . 2015;35(2):131-8.                                                                                                                            |
| SR | 220 | Marta GN, Riera R, Macedo CR, De Castro Jr G, Carvalho AL, Kowalski LP. Induction chemotherapy prior to surgery with or without postoperative radiotherapy for oral cavity cancer patients: Systematic review and meta-analysis. <i>Head and Neck</i> . 2015;37:E187.                                                                                          |
| SR | 221 | Peña L, Moreno CB, Gutierrez-Alvarez AM. Pain management in Guillain-Barre syndrome: A systematic review. <i>Neurologia (Barcelona, Spain)</i> . 2014.                                                                                                                                                                                                         |
| SR | 222 | Patil AS, Martin J, Tsukahara K, Skljarevski A, Miller K, Towns R, et al. Pseudomonas amniotic Pregnancy: Case Report and Review of Etiologic Considerations. <i>Fetal and Pediatric Pathology</i> . 2015.                                                                                                                                                     |
| SR | 223 | Visser BJ, Wieten RW, Kroon D, Nagel IM, Bèlard S, van Vugt M, et al. Efficacy and safety of artemisinin combination therapy (ACT) for non-falciparum malaria: a systematic review. <i>Malaria Journal</i> . 2014;13:463-.                                                                                                                                     |
| SR | 224 | Booksmythe I, Mautz B, Davis J, Nakagawa S, Jennions MD. Facultative adjustment of the offspring sex ratio and male attractiveness: a systematic review and meta-analysis. <i>Biological Reviews Of The Cambridge Philosophical Society</i> . 2015.                                                                                                            |
| SR | 225 | Liu YF, Dong H, Chen Z, Wang Y, Tu SH. Impact of ankylosing spondylitis on sexual function: A systematic review and meta analysis. <i>Experimental and Therapeutic Medicine</i> . 2015;9(4):1501-7.                                                                                                                                                            |
| SR | 226 | Rathbone J, Kaltenthaler E, Richards A, Tappenden P, Bessey A, Cantrell A. A systematic review of eculizumab for atypical haemolytic uraemic syndrome (aHUS). <i>BMJ Open</i> . 2013;3(11).                                                                                                                                                                    |
| SR | 227 | Konno R, Kang HS, Makimoto K. The best evidence for minimizing resistance-to-care during assisted personal care for older adults with dementia in nursing homes: A systematic review. <i>JBI Database of Systematic Reviews and Implementation Reports</i> . 2012;10(58):4622-32.                                                                              |
| SR | 228 | Lee MR, Unger JG, Rohrich RJ. Management of the nasal dorsum in rhinoplasty: a systematic review of the literature regarding technique, outcomes, and complications. <i>Plastic and reconstructive surgery</i> . 2011;128(5):538e-50e.                                                                                                                         |
| SR | 229 | Broeders JA, Roks DJGH, Ahmed Ali U, Draaisma WA, Smout AJPM, Hazebroek EJ. Laparoscopic anterior versus posterior fundoplication for gastroesophageal reflux disease: Systematic review and meta-analysis of randomised trials. <i>Surgical Endoscopy and Other Interventional Techniques</i> . 2012;26:S2.                                                   |
| SR | 230 | Jia Y, Chen C, Ng CS, Leung SW. Meta-analysis of randomized controlled trials on the efficacy of Di'ao Xinxuekang capsule and isosorbide dinitrate in treating angina pectoris. <i>Evidence-based Complementary and Alternative Medicine</i> . 2012;2012.                                                                                                      |
| SR | 231 | Chiappini E, Accetta G, Bonsignori F, Boddp V, Galli L, Biggeri A, et al. Interferon-γ release assays for the diagnosis of mycobacterium tuberculosis infection in children: A systematic review and meta-analysis. <i>International Journal of Immunopathology and Pharmacology</i> . 2012;25(3):557-64.                                                      |

|    |     |                                                                                                                                                                                                                                                                                                         |
|----|-----|---------------------------------------------------------------------------------------------------------------------------------------------------------------------------------------------------------------------------------------------------------------------------------------------------------|
| SR | 232 | Elnahas A, Graybiel K, Farrokhvar F, Gmora S, Anvari M, Hong D. Revisional surgery after failed laparoscopic adjustable gastric banding: A systematic review. <i>Surgical Endoscopy and Other Interventional Techniques</i> . 2013;27(3):740-5.                                                         |
| SR | 233 | Noyes AM, Thompson PD. A systematic review of the time course of atherosclerotic plaque regression. <i>Atherosclerosis</i> . 2014;234(1):75-84.                                                                                                                                                         |
| SR | 234 | Al-Moraissi EA, El-Sharkawy TM, El-Ghareeb TI, Chrcanovic BR. Three-dimensional versus standard miniplate fixation in the management of mandibular angle fractures: A systematic review and meta-analysis. <i>International Journal of Oral and Maxillofacial Surgery</i> . 2014;43(6):708-16.          |
| SR | 235 | Domínguez VB, Ramos N, García D, Bustamante M, Torrents A, Varea S, et al. Clinical trials during pregnancy: What has been done. A systematic review. <i>Basic and Clinical Pharmacology and Toxicology</i> . 2011;109:71.                                                                              |
| SR | 236 | Punukollu M, Mushet N, Linney M, Hennessy C, Morton M. Neuropsychiatric manifestations of Sydenham's chorea: A systematic review. <i>Developmental Medicine and Child Neurology</i> . 2015.                                                                                                             |
| SR | 237 | Dourdin N, Wagner M, Melnyk P, Rindress D. Systematic review to assess the quality of published health economic evaluations. <i>Journal of Population Therapeutics and Clinical Pharmacology</i> . 2011;18(2):e210.                                                                                     |
| SR | 238 | Hills C, Boshoff K, Jewell K. Preferred teaching and learning approaches of students considered 'Generation Y' in health professions pre registration education: A comprehensive systematic review protocol. <i>JBIC Database of Systematic Reviews and Implementation Reports</i> . 2013;11(5):140-56. |
| SR | 239 | Klonoff EA. Introduction to the special section on discrimination. <i>Health Psychology: Official Journal Of The Division Of Health Psychology, American Psychological Association</i> . 2014;33(1):1-2.                                                                                                |
| SR | 240 | Al Shemeili S, Klein S, Strath A, Stewart D. Identifying inappropriate anticholinergic prescribing in the elderly: A systematic review. <i>International Journal of Clinical Pharmacy</i> . 2013;35(6):1343.                                                                                            |
| SR | 241 | Oliveira MA, Ribeiro H, Castillo-Salgado C. Geospatial analysis applied to epidemiological studies of dengue: a systematic review. <i>Revista Brasileira De Epidemiologia = Brazilian Journal Of Epidemiology</i> . 2013;16(4):907-17.                                                                  |
| SR | 242 | Miller AC, Elamin EM, Suffredini AF. Inhaled anticoagulation regimens for the treatment of smoke inhalation-associated acute lung injury: A systematic review. <i>Critical Care Medicine</i> . 2014;42(2):413-9.                                                                                        |
| SR | 243 | Belvederi Murri M, Pariante CM, Dazzan P, Hepgul N, Papadopoulos AS, Zunsain P, et al. Hypothalamic-pituitary-adrenal axis and clinical symptoms in first-episode psychosis. <i>Psychoneuroendocrinology</i> . 2012;37(5):629-44.                                                                       |
| SR | 244 | Zeni MB. Systematic review of health literacy in Cochrane database studies on paediatric asthma educational interventions: Searching beyond rigorous design. <i>International Journal of Evidence-Based Healthcare</i> . 2012;10(1):3-8.                                                                |
| SR | 245 | Fleuren MAH, Paulussen TGWM, Van Dommelen P, Van Buuren S. Towards a measurement instrument for determinants of innovations. <i>International Journal For Quality In Health Care: Journal Of The International Society For Quality In Health Care / Isqua</i> . 2014;26(5):501-10.                      |
| SR | 246 | Yampolsky C, Hem S, Bendersky D. Dorsal column stimulator applications. <i>Surgical Neurology International</i> . 2012;3(SUPPL4):S275-S89.                                                                                                                                                              |
| SR | 247 | Polisena J, Chen S, Cimon K, McGill S, Forward K, Gardam M. Clinical effectiveness of rapid tests for methicillin resistant <i>Staphylococcus aureus</i> (MRSA) in hospitalized patients: A systematic review. <i>BMC Infectious Diseases</i> . 2011:336.                                               |
| SR | 248 | Hu Z, Yin X, Liao J, Zhou C, Yang Z, Zou S. The effect of teeth extraction for orthodontic treatment on the upper airway: a systematic review. <i>Sleep and Breathing</i> . 2015.                                                                                                                       |
| SR | 249 | Cleynen I, Vazeille E, Artieda M, Verspaget HW, Szczypiorska M, Bringer M-A, et al. Genetic and microbial factors modulating the ubiquitin proteasome system in inflammatory bowel disease. <i>Gut</i> . 2014;63(8):1265-74.                                                                            |
| SR | 250 | Gupta A, Chazen JL, Hartman M, Delgado D, Anumula N, Shao H, et al. Cerebrovascular reserve and stroke risk in patients with carotid stenosis or occlusion: A systematic review and meta-analysis. <i>Stroke</i> . 2012;43(11):2884-91.                                                                 |
| SR | 251 | Armstrong R, White S, Streak J, Tivey D. The effect of nasal introduction of anaesthetic in adults undergoing fiberoptic endoscopic evaluation of swallowing (FEES): A systematic review protocol. <i>JBIC Database of Systematic Reviews and Implementation Reports</i> . 2013;11(6):259-74.           |
| SR | 252 | Gao Q, Tsoi KKF, Hirai HW, Wong MCS, Chan FKL, Wu JCY, et al. Serrated polyps and the risk of synchronous colorectal advanced neoplasia: A systematic review and meta-analysis. <i>American Journal of Gastroenterology</i> . 2015;110(4):501-9.                                                        |
| SR | 253 | Sproat R, Radford P, Hunt A. Hemostatic glues in tonsillectomy: A systematic review. <i>Laryngoscope</i> . 2015.                                                                                                                                                                                        |
| SR | 254 | Bourke L, Rosario DJ, Steed L, Taylor SJC. Response to comment on 'Interventions to improve exercise behaviour in sedentary people living with and beyond cancer: A systematic review'. <i>British Journal of Cancer</i> . 2014;111(12):2378-9.                                                         |
| SR | 255 | Rodrigo GJ, Plaza V. Efficacy and safety of a fixed-dose combination of indacaterol and glycopyrronium for the treatment of COPD: A systematic review. <i>Chest</i> . 2014;146(2):309-17.                                                                                                               |
| SR | 256 | Mooney J, Ranasinghe I, Chow C, Barzi F, Zoungas S, Tan T, et al. Pre-operative kidney function as a predictor of adverse outcomes after surgery- A systematic review and meta-analysis. <i>Heart Lung and Circulation</i> . 2011;20:S212.                                                              |

|    |     |                                                                                                                                                                                                                                                                                                                 |
|----|-----|-----------------------------------------------------------------------------------------------------------------------------------------------------------------------------------------------------------------------------------------------------------------------------------------------------------------|
| SR | 257 | Ben Hadj Yahia M-B, Jouin-Bortolotti A, Dervaux B. Extending the Human Papillomavirus Vaccination Programme to Include Males in High-Income Countries: A Systematic Review of the Cost-Effectiveness Studies. <i>Clinical Drug Investigation</i> . 2015;35(8):471-85.                                           |
| SR | 258 | Singh AD, Turell ME, Topham AK. Uveal melanoma: Trends in incidence, treatment, and survival. <i>Ophthalmology</i> . 2011;118(9):1881-5.                                                                                                                                                                        |
| SR | 259 | Gornall BF, Myles PS, Smith CL, Burke JA, Leslie K, Pereira MJ, et al. Measurement of quality of recovery using the QoR-40: A quantitative systematic review. <i>British Journal of Anaesthesia</i> . 2013;111(2):161-9.                                                                                        |
| SR | 260 | Luijten M, Machielsen MWJ, Veltman DJ, Hester R, de Haan L, Franken IHA. Systematic review of ERP and fMRI studies investigating inhibitory control and error processing in people with substance dependence and behavioural addictions. <i>Journal of Psychiatry and Neuroscience</i> . 2014;39(3):149-69.     |
| SR | 261 | Wu CC, Bai CH, Huang MT, Wu CH, Tam KW. Local anesthetic infusion pump for pain management following open inguinal hernia repair: A meta-analysis. <i>International Journal of Surgery</i> . 2014;12(3):245-50.                                                                                                 |
| SR | 262 | Tsukamoto K, Machida K. Effects of psychological stress on neutrophil phagocytosis and bactericidal activity in humans a meta-analysis. <i>International Journal of Psychophysiology</i> . 2014;91(2):67-72.                                                                                                    |
| SR | 263 | Clark K, Currow DC. Assessing constipation in palliative care within a gastroenterology framework. <i>Palliative Medicine</i> . 2012;26(6):834-41.                                                                                                                                                              |
| SR | 264 | Boers M. Using literature to solve clinical problems. <i>Annals of the Rheumatic Diseases</i> . 2013;72.                                                                                                                                                                                                        |
| SR | 265 | De-Almeida CP, Wenzel A, de-Carvalho CS, Powell VB, Araújo-Neto C, Quarantini LC, et al. Amygdalar volume in borderline personality disorder with and without comorbid post-traumatic stress disorder: A meta-analysis. <i>CNS Spectrums</i> . 2012;17(2):70-5.                                                 |
| SR | 266 | Boerner KE, Birnie KA, Chambers CT, Taddio A, McMurtry CM, Noel M, et al. Simple Psychological Interventions for Reducing Pain From Common Needle Procedures in Adults: Systematic Review of Randomized and Quasi-Randomized Controlled Trials. <i>The Clinical Journal Of Pain</i> . 2015;31(10 Suppl):S90-S8. |
| SR | 267 | Jeon KC, Chen LS, Goodson P. Decision to abort after a prenatal diagnosis of sex chromosome abnormality: A systematic review of the literature. <i>Genetics in Medicine</i> . 2011.                                                                                                                             |
| SR | 268 | Muth A, Ragnarsson O, Johannsson G, Wängberg B. Systematic review of surgery and outcomes in patients with primary aldosteronism. <i>The British journal of surgery</i> . 2015;102(4):307-17.                                                                                                                   |
| SR | 269 | Pan X-F, Griffiths UK, Pennington M, Yu H, Jit M. Systematic review of economic evaluations of vaccination programs in mainland China: Are they sufficient to inform decision making? <i>Vaccine</i> . 2015.                                                                                                    |
| SR | 270 | Zeng X, Dong P, Xie X. Disease burden of rheumatoid arthritis in mainland China: A systematic review and meta-analysis. <i>Value in Health</i> . 2012;15(7):A672.                                                                                                                                               |
| SR | 271 | Sharma V, Deo SV, Altarabsheh SE, Cho YH, Erwin PJ, Park SJ. Comparison of the early haemodynamics of stented pericardial and porcine aortic valves. <i>European Journal Of Cardio-Thoracic Surgery: Official Journal Of The European Association For Cardio-Thoracic Surgery</i> . 2015;47(1):4-10.            |
| SR | 272 | Liu Y, Lv DL, Duan JJ, Xu SL, Zhang JF, Yang XJ, et al. ALDH1A1 expression correlates with clinicopathologic features and poor prognosis of breast cancer patients: A systematic review and meta-analysis. <i>BMC Cancer</i> . 2014;14(1).                                                                      |
| SR | 273 | Capolongo S, Buffoli M, Oppio A, Petronio MG. [Sustainability and hygiene of building: future perspectives]. <i>Epidemiologia E Prevenzione</i> . 2014;38(6 Suppl 2):46-50.                                                                                                                                     |
| SR | 274 | Ahsan SF, Wang Y. In response to "systematic review and meta-analysis of Meniett therapy for Meniere's disease". <i>Laryngoscope</i> . 2015.                                                                                                                                                                    |
| SR | 275 | Moraes LC, Só MVR, Dal Pizzol TdS, Ferreira MBC, Montagner F. Distribution of genes related to antimicrobial resistance in different oral environments: a systematic review. <i>Journal Of Endodontics</i> . 2015;41(4):434-41.                                                                                 |
| SR | 276 | McMahon JM, Volpe EM, Klostermann K, Trabold N, Xue Y. A systematic review of the psychometric properties of the Sexual Relationship Power Scale in HIV/AIDS research. <i>Archives Of Sexual Behavior</i> . 2015;44(2):267-94.                                                                                  |
| SR | 277 | Bennabi D, Aouizerate B, El-Hage W, Doumy O, Moliere F, Courtet P, et al. Risk factors for treatment resistance in unipolar depression: a systematic review. <i>Journal Of Affective Disorders</i> . 2015;171:137-41.                                                                                           |
| SR | 278 | Joshi A, Trout K. The role of health information kiosks in diverse settings: a systematic review. <i>Health Information And Libraries Journal</i> . 2014;31(4):254-73.                                                                                                                                          |
| SR | 279 | i JY, Zhang YF, Smith GS, Xue CJ, Luo YN, Chen WH, et al. Quality of reporting of randomized clinical trials in tai chi interventions-A systematic review. <i>Evidence-based Complementary and Alternative Medicine</i> . 2011;2011.                                                                            |
| SR | 280 | Wood TJ, Quinn KM, Farrokyar F, Deheshi B, Corbett T, Ghert MA. Local control of extra-abdominal desmoid tumors: Systematic review and meta-analysis. <i>Rare Tumors</i> . 2013;5(1):5-10.                                                                                                                      |
| SR | 281 | Mounesan L, Sepidarkish M, Hosseini H, Ahmadi A, Ardalan G, Kelishadi R, et al. Policy brief on promoting physical activity among adolescents. <i>International Journal of Preventive Medicine</i> . 2012;3(9):599-606.                                                                                         |
| SR | 282 | Dulon M, Peters C, Schablon A, Nienhaus A. MRSA carriage among healthcare workers in non-outbreak settings in Europe and the United States: A systematic review. <i>BMC Infectious Diseases</i> . 2014;14(1).                                                                                                   |

|    |     |                                                                                                                                                                                                                                                                                                                                                                   |
|----|-----|-------------------------------------------------------------------------------------------------------------------------------------------------------------------------------------------------------------------------------------------------------------------------------------------------------------------------------------------------------------------|
| SR | 283 | Xie ZB, Ma L, Wang XB, Bai T, Ye JZ, Zhong JH, et al. Transarterial embolization with or without chemotherapy for advanced hepatocellular carcinoma: a systematic review. <i>Tumor Biology</i> . 2014;35(9):8451-9.                                                                                                                                               |
| SR | 284 | Zhou H-X, Lu L, Chu T, Wang T, Cao D, Li F, et al. Skeletal cryptococcosis from 1977 to 2013. <i>Frontiers In Microbiology</i> . 2015;5:740-.                                                                                                                                                                                                                     |
| SR | 285 | Creemers H, Grupstra H, Nollet F, van den Berg LH, Beelen A. Prognostic factors for the course of functional status of patients with ALS: a systematic review. <i>Journal of Neurology</i> . 2015;262(6):1407-23.                                                                                                                                                 |
| SR | 286 | Malchow B, Hasan A, Fusar-Poli P, Schmitt A, Falkai P, Wobrock T. Cannabis abuse and brain morphology in schizophrenia: A review of the available evidence. <i>European Archives of Psychiatry and Clinical Neuroscience</i> . 2013;263(1):3-13.                                                                                                                  |
| SR | 287 | Rahimtoola SH, Huang G. Treatment of obstructive thrombosed prosthetic heart valve. <i>Cardiology (Switzerland)</i> . 2015;131:98.                                                                                                                                                                                                                                |
| SR | 288 | Wolz I, Fagundo AB, Treasure J, Fernández-Aranda F. The processing of food stimuli in abnormal eating: A systematic review of electrophysiology. <i>European Eating Disorders Review</i> . 2015;23(4):251-61.                                                                                                                                                     |
| SR | 289 | Schinasi L, Leon ME. Non-hodgkin lymphoma and occupational exposure to agricultural pesticide chemical groups and active ingredients: A systematic review and meta-analysis. <i>International Journal of Environmental Research and Public Health</i> . 2014;11(4):4449-527.                                                                                      |
| SR | 290 | Baker L, Beres AL, Baird R. A systematic review and meta-analysis of gastrostomy insertion techniques in children. <i>Journal of Pediatric Surgery</i> . 2015;50(5):718-25.                                                                                                                                                                                       |
| SR | 291 | Abdallah FW, Halpern SH, Aoyama K, Brull R. Will the real benefits of single-shot interscalene block please stand up? A systematic review and meta-analysis. <i>Anesthesia and Analgesia</i> . 2015;120(5):1114-29.                                                                                                                                               |
| SR | 292 | Bryden A, Roberts B, Petticrew M, McKee M. A systematic review of the influence of community level social factors on alcohol use. <i>Health and Place</i> . 2013;21:70-85.                                                                                                                                                                                        |
| SR | 293 | Zwiers R, Wiegerinck JI, Murawski CD, Smyth NA, Kennedy JG, Van Dijk CN. Surgical treatment for posterior ankle impingement. <i>Arthroscopy - Journal of Arthroscopic and Related Surgery</i> . 2013;29(7):1263-70.                                                                                                                                               |
| SR | 294 | Van Der Meer FJ, Veltorst E, Meijer CJ, Machielsen MW, Fusar-Poli P, De Haan L. Cannabis use in patients at clinical high risk of psychosis: Impact on prodromal symptoms and transition to psychosis-a systematic review. <i>Schizophrenia Research</i> . 2012;136:S347.                                                                                         |
| SR | 295 | Zhang R, Xu Y, Yang S, Liang H, Zhang Y, Liu Y. OnabotulinumtoxinA for neurogenic detrusor overactivity and dose differences: a systematic review. <i>International braz j urol : official journal of the Brazilian Society of Urology</i> . 2015;41(2):207-19.                                                                                                   |
| RR | 296 | Kiezebrink K, Coyle J, Hoddinott P, Witham M, Clarke A, Avenell A. Ways to intervene and support engagement of older adults weight loss study (wise owls) c mixed methods project developing an intervention. <i>Annals of Nutrition and Metabolism</i> . 2013;63:721-2.                                                                                          |
| RR | 297 | Chaiyachati KH, Ogbuoi O, Price M, Suthar AB, Negussie EK, Bärnighausen T. Interventions to improve adherence to antiretroviral therapy: a rapid systematic review. <i>AIDS (London, England)</i> . 2014;28 Suppl 2:S187-S204.                                                                                                                                    |
| RR | 298 | Franek J. Challenges of developing rapid guidance for complex interventions. <i>BMJ Quality and Safety</i> . 2013;22:A33.                                                                                                                                                                                                                                         |
| RR | 299 | Dennis SM, Harris M, Lloyd J, Powell Davies G, Faruqi N, Zwar N. Do people with existing chronic conditions benefit from telephone coaching? A rapid review. <i>Australian Health Review: A Publication Of The Australian Hospital Association</i> . 2013;37(3):381-8.                                                                                            |
| RR | 300 | Hildon Z, Neuburger J, Allwood D, van der Meulen J, Black N. Clinicians' and patients' views of metrics of change derived from patient reported outcome measures (PROMs) for comparing providers' performance of surgery. <i>BMC health services research</i> . 2012;12:171.                                                                                      |
| RR | 301 | Elliott IA, Beech AR. A U.K. Cost-Benefit Analysis of Circles of Support and Accountability Interventions. <i>Sexual Abuse: Journal of Research and Treatment</i> . 2013;25(3):211-29.                                                                                                                                                                            |
| RR | 302 | Jarrett N, Scott I, Addington-Hall J, Amir Z, Brearley S, Hodges L, et al. Informing future research priorities into the psychological and social problems faced by cancer survivors: a rapid review and synthesis of the literature. <i>European Journal Of Oncology Nursing: The Official Journal Of European Oncology Nursing Society</i> . 2013;17(5):510-20. |
| RR | 303 | Varker T, Forbes D, Dell L, Weston A, Merlin T, Hodson S, et al. Rapid evidence assessment: increasing the transparency of an emerging methodology. <i>Journal Of Evaluation In Clinical Practice</i> . 2015.                                                                                                                                                     |
| RR | 304 | Khangura S, Konnyu K, Cushman R, Grimshaw J, Moher D. Evidence summaries: The evolution of a rapid review approach. <i>Systematic Reviews</i> . 2012;1(1).                                                                                                                                                                                                        |
| RR | 305 | Jain S, Boyd C, Fiorentino L, Khorsan R, Crawford C. Are there efficacious treatments for treating the fatigue-sleep disturbance-depression symptom cluster in breast cancer patients? A Rapid Evidence Assessment of the Literature (REAL®). <i>Breast Cancer: Targets and Therapy</i> . 2015;7:267-91.                                                          |
| RR | 306 | Feys F, Devroey D. Dapoxetine for premature ejaculation: A rapid evidence assessment. <i>Journal of Sexual Medicine</i> . 2015;12:24.                                                                                                                                                                                                                             |
| RR | 307 | Sutton A, Grant MJ. Cost-effective ways of delivering enquiry services: a rapid review. <i>Health Information And Libraries Journal</i> . 2011;28(4):249-55.                                                                                                                                                                                                      |
| RR | 308 | Jain S, Fiorentino L, Lee C, Crawford C, Khorsan R, Jonas W. A rapid evidence assessment (real®) of the literature: Are there efficacious treatments for treating the                                                                                                                                                                                             |

|    |     |                                                                                                                                                                                                                                                                                                                                                        |
|----|-----|--------------------------------------------------------------------------------------------------------------------------------------------------------------------------------------------------------------------------------------------------------------------------------------------------------------------------------------------------------|
|    |     | fatigue-sleep disturbance-depression symptom cluster in breast cancer patients? <i>Psycho-Oncology</i> . 2013;22:75-6.                                                                                                                                                                                                                                 |
| RR | 309 | Manayi A, Saeidnia S. A concern on phthalate pollution of herbal extracts/medicines and detection methods. <i>Research Journal of Pharmacognosy</i> . 2014;2(3):49-54.                                                                                                                                                                                 |
| RR | 310 | Boycott N, Schneider J, McMurrin M. Additional interventions to enhance the effectiveness of individual placement and support: a rapid evidence assessment. <i>Rehabilitation Research And Practice</i> . 2012;2012:382420-.                                                                                                                           |
| RR | 311 | Tavares SBN, Alves de Sousa NL, Manrique EJC, Pinheiro de Albuquerque ZB, Zeferino LC, Amaral RG. Improvement in the routine screening of cervical smears: A study using rapid prescreening and 100% rapid review as internal quality control methods. <i>Cancer Cytopathology</i> . 2011;119(6):367-76.                                               |
| RR | 312 | Khorsan R, Crawford C, Ives JA, Walter AR, Jonas WB. The effect of omega-3 fatty acids on biomarkers of inflammation: a rapid evidence assessment of the literature. <i>Military Medicine</i> . 2014;179(11 Suppl):2-60.                                                                                                                               |
| RR | 313 | Thomas B, Potter J, Sacks G, Webster J. Evaluation of national food reformulation initiatives: A proposed evaluation tool. <i>Global Heart</i> . 2014;9(1):e309.                                                                                                                                                                                       |
| RR | 314 | Lee C, Crawford C, Wallerstedt D, York A, Duncan A, Smith J, et al. The effectiveness of acupuncture research across components of the trauma spectrum response (tsr): A systematic review of reviews. <i>Systematic Reviews</i> . 2012;1(1).                                                                                                          |
| RR | 315 | McDaid D, Park A. Investing in integrative medicine for mental health and wellbeing: Making the economic case. <i>BMC Complementary and Alternative Medicine</i> . 2012;12.                                                                                                                                                                            |
| RR | 316 | Kim S, Wang B, Lee J, Kim B, La H, Park YM, et al. Statistical analysis system of spontaneous adverse drug reaction reports. <i>Journal of Korean Society for Clinical Pharmacology and Therapeutics</i> . 2012;20(2):155-64.                                                                                                                          |
| RR | 317 | Shin JJ, Rosenfeld RM, Schwartz SR, Mitchell RB, Weinberger DG. Rapid review: The guidelines in pediatric otolaryngology. <i>Otolaryngology - Head and Neck Surgery (United States)</i> . 2012;147:P30.                                                                                                                                                |
| RR | 318 | van den Broek EMJM, van der Zaag-Loonen HJ, Bruintjes TD. Systematic Review: Efficacy of Gufoni Maneuver for Treatment of Lateral Canal Benign Paroxysmal Positional Vertigo with Geotropic Nystagmus. <i>Otolaryngology--Head And Neck Surgery: Official Journal Of American Academy Of Otolaryngology-Head And Neck Surgery</i> . 2014;150(6):933-8. |
| RR | 319 | Reynolds P. Gap analysis of animal hemorrhagic shock models through rapid evidence assessment strategies. <i>Shock</i> . 2015;43(6):42.                                                                                                                                                                                                                |
| RR | 320 | Macaulay R. What the english could learn from the Irish: Making the nice approval process more cost-effective. <i>Value in Health</i> . 2014;17(7):A440.                                                                                                                                                                                               |
| RR | 321 | Sadlier M, Murphy M. Do standardized referral forms improve the quality of general practitioner referral letters to pigmented lesion clinics? A pilot study. <i>British Journal of Dermatology</i> . 2012;167(6):e29.                                                                                                                                  |
| RR | 322 | Lui M, Jones CA, Westby MD. Effect of non-surgical, non-pharmacological weight loss interventions in patients who are obese prior to hip and knee arthroplasty surgery: a rapid review. <i>Systematic Reviews</i> . 2015;4:121-.                                                                                                                       |
| RR | 323 | Wiffen PJ, Derry S, Moore RA. Impact of morphine, fentanyl, oxycodone or codeine on patient consciousness, appetite and thirst when used to treat cancer pain. <i>The Cochrane Database Of Systematic Reviews</i> . 2014;5:CD011056.                                                                                                                   |
| RR | 324 | Moran R, Davidson P. An uneven spread: a review of public involvement in the National Institute of Health Research's Health Technology Assessment program. <i>International Journal Of Technology Assessment In Health Care</i> . 2011;27(4):343-7.                                                                                                    |
| RR | 325 | Ryu S, James J, Gerszten P, Yin F, Timmerman R, Hitchcock Y, et al. RTOG 0631 Phase II/III study of image-guided stereotactic radiosurgery for localized spine metastases: Phase II results. <i>International Journal of Radiation Oncology Biology Physics</i> . 2011;81(2):S131-S2.                                                                  |
| RR | 326 | Marks L, Weatherly H, Mason A. Prioritizing investment in public health and health equity: what can commissioners do? <i>Public Health</i> . 2013;127(5):410-8.                                                                                                                                                                                        |
| RR | 327 | Koster M, Garrity C, Gallagher C, Schunemann H, Norris S. The role of rapid systematic reviews for development of rapid guidance in health care and health policy settings. <i>BMJ Quality and Safety</i> . 2013;22:A6.                                                                                                                                |
| RR | 328 | Halladay CW, Trikalinos TA, Schmid IT, Schmid CH, Dahabreh IJ. Using data sources beyond PubMed has a modest impact on the results of systematic reviews of therapeutic interventions. <i>Journal of Clinical Epidemiology</i> . 2015;68(9):1076-84.                                                                                                   |
| RR | 329 | Klee EW, Winter E, Ferber MJ. Bioinformatics decision support for interpretation of clinical NGS variants. <i>Journal of Molecular Diagnostics</i> . 2013;15(6):940-1.                                                                                                                                                                                 |
| RR | 330 | Kirkland SW, Bullard M, Couperthwaite S, Rowe BH. Establishing a standardized process of gathering evidence-based information to support clinical knowledge development. <i>Canadian Journal of Emergency Medicine</i> . 2014;16:S95.                                                                                                                  |
| RR | 331 | Ryu S, Pugh SL, Gerszten PC, Yin F-F, Timmerman RD, Hitchcock YJ, et al. RTOG 0631 phase 2/3 study of image guided stereotactic radiosurgery for localized (1-3) spine metastases: phase 2 results. <i>Practical Radiation Oncology</i> . 2014;4(2):76-81.                                                                                             |
| RR | 332 | Yang ZX, Shen JT, Li YP, Zhao K, Shi CH, Xiao Y, et al. Helical tomotherapy for cancer treatment: a rapid health technology assessment. <i>Journal Of Evidence-Based Medicine</i> . 2014;7(3):192-218.                                                                                                                                                 |
| RR | 333 | de Bruin RJM, Hage R, van der Zaag-Loonen H, van Benthem PPG. Rapid review: sinonasal surgery vs. medical therapy for asthma in patients with chronic rhinosinusitis with or without nasal polyps. <i>European Archives Of Oto-Rhino-Laryngology: Official Journal Of The European Federation Of Oto-Rhino-Laryngological Societies (EUFOS)</i> :      |

|    |     |                                                                                                                                                                                                                                                                                                                                            |
|----|-----|--------------------------------------------------------------------------------------------------------------------------------------------------------------------------------------------------------------------------------------------------------------------------------------------------------------------------------------------|
|    |     | Affiliated With The German Society For Oto-Rhino-Laryngology - Head And Neck Surgery. 2015.                                                                                                                                                                                                                                                |
| RR | 334 | Neville-Webbe HL, Carser JE, Wong H, Andrews J, Poulter T, Smith R, et al. The impact of a new acute oncology service in acute hospitals: Experience from the Clatterbridge Cancer Centre and Merseyside and Cheshire Cancer Network. <i>Clinical Medicine, Journal of the Royal College of Physicians of London</i> . 2013;13(6):565-659. |
| RR | 335 | Lombardi G, Zustovich F, Farina P, Polo V, Farina M, Puppa AD, et al. Cilengitide in bevacizumab-refractory high-grade glioma: two case reports and critical review of the literature. <i>Anti-Cancer Drugs</i> . 2012;23(7):749-53.                                                                                                       |
| RR | 336 | Petrosino A, Campie P, Pace J, Fronius T, Guckenburg S, Wiatrowski M, et al. Cross-sector, multi-agency interventions to address urban youth firearms violence: A Rapid Evidence Assessment. <i>Aggression and Violent Behavior</i> . 2015;22:87-96.                                                                                       |
| RR | 337 | Freitas MG, Souza KM, Silva MT, Elias FTS. Bariatric surgery from the perspective of brazilian national health system (sus). <i>Value in Health</i> . 2012;15(7):A402-A3.                                                                                                                                                                  |
| RR | 338 | Coleman P, Turner J. Patient priorities and decision-making about using 999 EMS? A review of the literature. <i>Emergency Medicine Journal</i> . 2011;28(11):e2.                                                                                                                                                                           |
| RR | 339 | Davidson G, Kelly B, Macdonald G, Rizzo M, Lombard L, Abogunrin O, et al. Supported decision making: a review of the international literature. <i>International Journal Of Law And Psychiatry</i> . 2015;38:61-7.                                                                                                                          |
| RR | 340 | Hartling L, Guise J-M, Kato E, Anderson J, Aronson N, Belinson S, et al. EPC Methods: An Exploration of Methods and Context for the Production of Rapid Reviews. 2015.                                                                                                                                                                     |
| RR | 341 | Talaulikar VS, Arulkumaran S. Medico-legal issues with CTG interpretation. <i>Current Women's Health Reviews</i> . 2013;9(3):145-57.                                                                                                                                                                                                       |
| RR | 342 | Yadav R, Shah AK, Loeb JA, Swamy MNS, Agarwal R. Morphology-based automatic seizure detector for intracerebral EEG recordings. <i>IEEE Transactions on Biomedical Engineering</i> . 2012;59(7):1871-81.                                                                                                                                    |
| RR | 343 | Crawford C, Lee C, Freilich D, Buckenmaier CC, Crawford P, Delgado R, et al. Effectiveness of active self-care complementary and integrative medicine therapies: Options for the management of chronic pain symptoms. <i>Pain Medicine (United States)</i> . 2014;15(S1):S86-S95.                                                          |
| RR | 344 | Toomey E, Currie-Murphy L, Matthews J, Hurley DA. Implementation fidelity of physiotherapist-delivered group education and exercise interventions to promote self-management in people with osteoarthritis and chronic low back pain: a rapid review part II. <i>Manual Therapy</i> . 2015;20(2):287-94.                                   |
| RR | 345 | Treanor CJ, Donnelly M. The late effects of cancer and cancer treatment: a rapid review. <i>The Journal Of Community And Supportive Oncology</i> . 2014;12(4):137-48.                                                                                                                                                                      |
| RR | 346 | Miani C, Ball S, Pitchforth E, Exley J, King S, Roland M, et al. Organisational interventions to reduce length of stay in hospital: a rapid evidence assessment. 2014.                                                                                                                                                                     |
| RR | 347 | Kilpatrick C, Murdoch H, Paterson A. The rapid delivery of national evidence based recommendations for HAI care bundles. <i>Antimicrobial Resistance and Infection Control</i> . 2013;2.                                                                                                                                                   |
| RR | 348 | Attipoe S, Zeno SA, Lee C, Crawford C, Khorsan R, Walter AR, et al. Tyrosine for Mitigating Stress and Enhancing Performance in Healthy Adult Humans, a Rapid Evidence Assessment of the Literature. <i>Military Medicine</i> . 2015;180(7):754-65.                                                                                        |
| RR | 349 | Lee C, Crawford C, Buckenmaier C, Schoomaker E, Delgado R, York A. Active, self-care complementary and integrative medicine therapies for the management of chronic pain symptoms: A rapid evidence assessment of the literature. <i>Journal of Alternative and Complementary Medicine</i> . 2014;20(5):A137-A8.                           |
| RR | 350 | Nancarrow SA, Roots A, Grace S, Saberi V. Models of care involving district hospitals: a rapid review to inform the Australian rural and remote context. <i>Australian Health Review: A Publication Of The Australian Hospital Association</i> . 2015.                                                                                     |
| RR | 351 | Bungay H, Vella-Burrows T. The effects of participating in creative activities on the health and well-being of children and young people: a rapid review of the literature. <i>Perspectives In Public Health</i> . 2013;133(1):44-52.                                                                                                      |
| RR | 352 | Polisena J, Garrity C, Kamel C, Stevens A, Abou-Setta AM. Rapid review programs to support health care and policy decision making: a descriptive analysis of processes and methods. <i>Systematic Reviews</i> . 2015;4:26-.                                                                                                                |
| RR | 353 | Fitzpatrick-Lewis D, Ganann R, Krishnaratne S, Ciliska D, Kouyoumdjian F, Hwang SW. Effectiveness of interventions to improve the health and housing status of homeless people: a rapid systematic review. <i>BMC public health</i> . 2011;11:638.                                                                                         |
| RR | 354 | Belshaw Z, Asher L, Harvey ND, Dean RS. Quality of life assessment in domestic dogs: An evidence-based rapid review. <i>Veterinary Journal</i> . 2015.                                                                                                                                                                                     |
| RR | 355 | Tricco AC, Zarin W, Antony J, Hutton B, Moher D, Sherifali D, et al. An international survey and modified Delphi approach revealed numerous rapid review methods. <i>Journal Of Clinical Epidemiology</i> . 2015.                                                                                                                          |
| RR | 356 | Mobinizadeh M, Oliyaeemanesh A, Doaee S, Nejati M, Aboee P, Azadbakht M, et al. Health technology assessment of infliximab: A rapid review of type 2 studies. <i>Journal of Isfahan Medical School</i> . 2012;30(178).                                                                                                                     |
| RR | 357 | York A, Crawford C, Walter A, Walter JAG, Jonas WB, Coeytaux R. Acupuncture research in military and veteran populations: A rapid evidence assessment of the literature. <i>Medical Acupuncture</i> . 2011;23(4):229-36.                                                                                                                   |
| RR | 358 | Cai J-Q, Chen K, Mou Y-P, Pan Y, Xu X-W, Zhou Y-C, et al. Laparoscopic versus open wedge resection for gastrointestinal stromal tumors of the stomach: a single-center 8-year retrospective cohort study of 156 patients with long-term follow-up. <i>BMC Surgery</i> . 2015;15:58-.                                                       |

|    |     |                                                                                                                                                                                                                                                                                                                                             |
|----|-----|---------------------------------------------------------------------------------------------------------------------------------------------------------------------------------------------------------------------------------------------------------------------------------------------------------------------------------------------|
| RR | 359 | Visnansky M, Mesaros S. Patient self-testing of oral anticoagulation therapy by coaguchek® xs system. Rapid health technology assessment in Slovak health care environment. <i>Value in Health</i> . 2011;14(7):A257-A8.                                                                                                                    |
| RR | 360 | Turner RM, Bird SM, Higgins JPT. The impact of study size on meta-analyses: examination of underpowered studies in Cochrane reviews. <i>Plos One</i> . 2013;8(3):e59202-e.                                                                                                                                                                  |
| RR | 361 | Hersi M, Stevens A, Quach P, Hamel C, Thavorn K, Garritty C, et al. Effectiveness of Personal Protective Equipment for Healthcare Workers Caring for Patients with Filovirus Disease: A Rapid Review. <i>Plos One</i> . 2015;10(10):e0140290-e.                                                                                             |
| RR | 362 | Doaee S, Mobinizadeh M, Oliyaeemanesh A. Rapid health technology assessment in rehabilitation hospital: Review article. <i>Journal of Isfahan Medical School</i> . 2013;31(237).                                                                                                                                                            |
| RR | 363 | Chao ST, Meier T, Godley A, Hugebeck B, Kolar M, Barrett P, et al. One-year experience with the workflow enhancement (we) team: Does continuous improvement have to be continuous? <i>International Journal of Radiation Oncology Biology Physics</i> . 2014;90(1):S744.                                                                    |
| RR | 364 | Kelly BJ, Perkins DA, Fuller JD, Parker SM. Shared care in mental illness: A rapid review to inform implementation. <i>International Journal Of Mental Health Systems</i> . 2011;5:31-.                                                                                                                                                     |
| RR | 365 | Lee C, Crawford C, Teo L, Spevak C. An analysis of the various chronic pain conditions captured in a systematic review of active self-care complementary and integrative medicine therapies for the management of chronic pain symptoms. <i>Pain Medicine (Malden, Mass)</i> . 2014;15 Suppl 1:S96-S103.                                    |
| RR | 366 | Hayden JA, Killian L, Zygmunt A, Babineau J, Martin-Misener R, Jensen JL, et al. Methods of a multi-faceted rapid knowledge synthesis project to inform the implementation of a new health service model: Collaborative Emergency Centres. <i>Systematic Reviews</i> . 2015;4(1).                                                           |
| RR | 367 | Toomey E, Currie-Murphy L, Matthews J, Hurley DA. The effectiveness of physiotherapist-delivered group education and exercise interventions to promote self-management for people with osteoarthritis and chronic low back pain: a rapid review part I. <i>Manual Therapy</i> . 2015;20(2):265-86.                                          |
| RR | 368 | Tse Y, Charters H. Rapid response to safety incidences in a children's hospital-reconstructing a system fit for the Francis report era. <i>Archives of Disease in Childhood</i> . 2014;99:A201.                                                                                                                                             |
| RR | 369 | McMurrin M. Individual-level interventions for alcohol-related violence: A rapid evidence assessment. <i>Criminal Behaviour and Mental Health</i> . 2011.                                                                                                                                                                                   |
| RR | 370 | Twycross A, Parker R, Williams A, Gibson F. Cancer-Related Pain and Pain Management: Sources, Prevalence, and the Experiences of Children and Parents. <i>Journal Of Pediatric Oncology Nursing: Official Journal Of The Association Of Pediatric Oncology Nurses</i> . 2015;32(6):369-84.                                                  |
| RR | 371 | Vujanic G, Sandstedt B, Leuschner I, Sznajder B. Central pathology review in multicentre tumour trials-do we really need it? <i>Pediatric Blood and Cancer</i> . 2011;57(5):742.                                                                                                                                                            |
| RR | 372 | Mahon S, Redmond S, Carney P. Transparency of the medicines reimbursement system in Ireland: A quantitative analysis of the influences on reimbursement decisions [2006-2013]. <i>Value in Health</i> . 2013;16(7):A459.                                                                                                                    |
| RR | 373 | Treatments for Constipation: A Review of Systematic Reviews. Canadian Agency for Drugs and Technologies in Health Rapid Response Reports. 2014.                                                                                                                                                                                             |
| RR | 374 | Featherstone RM, Dryden DM, Foisy M, Guise J-M, Mitchell MD, Paynter RA, et al. Advancing knowledge of rapid reviews: an analysis of results, conclusions and recommendations from published review articles examining rapid reviews. <i>Systematic Reviews</i> . 2015;4:50-.                                                               |
| RR | 375 | Geng Y, Fowler CS, Fulton S. Clinical librarian support for rapid review of clinical utility of cancer molecular biomarkers. <i>Medical Reference Services Quarterly</i> . 2015;34(2):202-14.                                                                                                                                               |
| RR | 376 | Beani JC. Solar protection products: Efficacy and risks. <i>Annales de Dermatologie et de Venereologie</i> . 2012;139(4):261-72.                                                                                                                                                                                                            |
| RR | 377 | Moeller-Saxone K, Davis E, Herrman H. Promoting mental health in Asia-Pacific: Systematic review focusing on Thailand and China. <i>Asia-Pacific Psychiatry: Official Journal Of The Pacific Rim College Of Psychiatrists</i> . 2015;7(4):355-65.                                                                                           |
| RR | 378 | Ju H, Hewson K. Health technology assessment and evidence-based policy making: Queensland Department of Health experience. <i>International Journal Of Technology Assessment In Health Care</i> . 2014;30(6):595-600.                                                                                                                       |
| RR | 379 | Manrique EJC, Souza NLA, Tavares SBN, Albuquerque ZBP, Zeferino LC, Amaral RG. Analysis of the performance of 100% rapid review using an average time of 1 and 2 minutes according to the quality of cervical cytology specimens. <i>Cytopathology: Official Journal Of The British Society For Clinical Cytology</i> . 2011;22(3):195-201. |
| RR | 380 | Bragge P, Piccenna L, Middleton JW, Williams S, Creasey G, Dunlop S, et al. Developing a spinal cord injury research strategy using a structured process of evidence review and stakeholder dialogue. Part I: rapid review of SCI prioritisation literature. <i>Spinal Cord</i> . 2015;53(10):714-20.                                       |
| RR | 381 | Lee C, Crawford C, Hickey A. Mind-body therapies for the self-management of chronic pain symptoms. <i>Pain Medicine (Malden, Mass)</i> . 2014;15 Suppl 1:S21-S39.                                                                                                                                                                           |
| RR | 382 | Lockett T, Phillips J, Agar M, Virdun C, Green A, Davidson PM. Elements of effective palliative care models: a rapid review. <i>BMC Health Services Research</i> . 2014;14:136-.                                                                                                                                                            |
| RR | 383 | Van De Velde S, De Buck E, Dieltjens T, Aertgeerts B. Medicinal use of potato-derived products: Conclusions of a rapid versus full systematic review. <i>Phytotherapy Research</i> . 2011;25(5):787-8.                                                                                                                                      |

|    |     |                                                                                                                                                                                                                                                                                                                                                                 |
|----|-----|-----------------------------------------------------------------------------------------------------------------------------------------------------------------------------------------------------------------------------------------------------------------------------------------------------------------------------------------------------------------|
| RR | 384 | Szmuda T, Sloniewski P, Waszak PM, Springer J, Szmuda M. Towards a new treatment paradigm for ruptured blood blister-like aneurysms of the internal carotid artery? A rapid systematic review. <i>Journal Of Neurointerventional Surgery</i> . 2015.                                                                                                            |
| RR | 385 | Heard T, Chandra A, Culora G, Gupta SS, Herbert A, Morgan M. Use of the ThinPrep Imaging System for internal quality control of cervical cytology. <i>Cytopathology: Official Journal Of The British Society For Clinical Cytology</i> . 2013;24(4):246-53.                                                                                                     |
| RR | 386 | Qi Q, Fang G, Chen YX, Liu Y, Zhou CL, Wang J, et al. Mass vaccination campaign of hepatitis a vaccine and measles-mumps-rubella live attenuated vaccine in children in stricken regions of 4.20 lushan earthquake in Sichuan Province. <i>Chinese Journal of Evidence-Based Medicine</i> . 2014;14(5):501-4.                                                   |
| RR | 387 | Migliore A, Jefferson T, Cerbo M, Abraha I, Montedori A. Implantable devices for the closure of patent foramen ovale in adults: an Italian rapid health technology assessment. <i>Expert Review Of Medical Devices</i> . 2014;11(2):151-61.                                                                                                                     |
| RR | 388 | Polisena J, Garrity C, Umscheid CA, Kamel C, Samra K, Smith J, et al. Rapid Review Summit: an overview and initiation of a research agenda. <i>Systematic Reviews</i> . 2015;4:111-.                                                                                                                                                                            |
| RR | 389 | Lavery B, Orton S, Baker H, Ross J, Walsh R, Stevens R, et al. Transforming follow-up: Patients as true partners in a major multi-disciplinary change project. <i>European Journal of Cancer</i> . 2013;49:S438.                                                                                                                                                |
| RR | 390 | Venugopal S, Blundell J, Raja Sri A, Bennett G. Current management of iron deficiency in pregnancy at a district general hospital. <i>British Journal of Haematology</i> . 2013;161:74.                                                                                                                                                                         |
| RR | 391 | Mattivi JT, Buchberger B. [Rapid Reviews: Sisyphos' Salvation? - An Inventory]. <i>Gesundheitswesen (Bundesverband Der Arzte Des Offentlichen Gesundheitsdienstes (Germany))</i> . 2015.                                                                                                                                                                        |
| RR | 392 | Wolffenden L, Carruthers J, Wyse R, Yoong S. Translation of tobacco control programs in schools: findings from a rapid review of systematic reviews of implementation and dissemination interventions. <i>Health Promotion Journal Of Australia: Official Journal Of Australian Association Of Health Promotion Professionals</i> . 2014;25(2):136-8.           |
| RR | 393 | Van der Scheer-Horst ES, van Benthem PPG, Brintjes TD, van Leeuwen RB, van der Zaag-Loonen HJ. The efficacy of vestibular rehabilitation in patients with benign paroxysmal positional vertigo: a rapid review. <i>Otolaryngology--Head And Neck Surgery: Official Journal Of American Academy Of Otolaryngology-Head And Neck Surgery</i> . 2014;151(5):740-5. |
| RR | 394 | Antidepressants in Elderly Patients with Major and Minor Depression: A Review of Clinical Effectiveness and Guidelines. <i>Canadian Agency for Drugs and Technologies in Health Rapid Response Reports</i> . 2015.                                                                                                                                              |
| RR | 395 | Yadav R, Shah AK, Loeb JA, Swamy MN, Agarwal R. A novel unsupervised spike sorting algorithm for intracranial EEG. <i>Conference proceedings : Annual International Conference of the IEEE Engineering in Medicine and Biology Society IEEE Engineering in Medicine and Biology Society Conference</i> . 2011;2011:7545-8.                                      |
| RR | 396 | Tricco AC, Antony J, Zarin W, Striffler L, Ghassemi M, Ivory J, et al. A scoping review of rapid review methods. <i>BMC Medicine</i> . 2015;13(1).                                                                                                                                                                                                              |
| RR | 397 | Golfam M, Beall R, Brehaut J, Saeed S, Relton C, Ashbury FD, et al. Comparing alternative design options for chronic disease prevention interventions. <i>European Journal Of Clinical Investigation</i> . 2015;45(1):87-99.                                                                                                                                    |
| RR | 398 | Van der Veen EL, van Hulst RA, de Ru JA. Hyperbaric Oxygen Therapy in Acute Acoustic Trauma: A Rapid Systematic Review. <i>Otolaryngology--Head And Neck Surgery: Official Journal Of American Academy Of Otolaryngology-Head And Neck Surgery</i> . 2014;151(1):42-5.                                                                                          |
| RR | 399 | Vogus A, Graff K. PEPFAR Transitions to Country Ownership: Review of Past Donor Transitions and Application of Lessons Learned to the Eastern Caribbean. <i>Global Health, Science And Practice</i> . 2015;3(2):274-86.                                                                                                                                         |
| RR | 400 | Liew Y, De Berker D, Sansom J. Rapid clinical review of patients assessed by a teledermatology service: Analysis of pathways and outcomes. <i>British Journal of Dermatology</i> . 2014;171:138.                                                                                                                                                                |
| RR | 401 | Hwang EH, Hwang M, Shin BC, Lee GS. Effect of Tai Chi as therapeutic exercise on blood pressure: Rapid systematic review. <i>Journal of Alternative and Complementary Medicine</i> . 2014;20(5):A57.                                                                                                                                                            |
| RR | 402 | Banbury A, Roots A, Nancarrow S. Rapid review of applications of e-health and remote monitoring for rural residents. <i>The Australian Journal Of Rural Health</i> . 2014;22(5):211-22.                                                                                                                                                                         |
| RR | 403 | Souza KM, Goncalves L. HTA studies on orphan drugs by rebratsxmembers. <i>Value in Health</i> . 2014;17(7):A540.                                                                                                                                                                                                                                                |
| RR | 404 | Briand C, Menear M. Implementing a continuum of evidence-based psychosocial interventions for people with severe mental illness: Part 2 - Review of critical implementation issues. <i>Canadian Journal of Psychiatry</i> . 2014;59(4):187-95.                                                                                                                  |
| RR | 405 | Exploring the method and process of rapid review. <i>Chinese Journal of Evidence-Based Medicine</i> . 2014;14(5):497-500.                                                                                                                                                                                                                                       |
| RR | 406 | Parker S, Fuller J. Are nurses well placed as care co-ordinators in primary care and what is needed to develop their role: a rapid review? <i>Health &amp; Social Care In The Community</i> . 2015.                                                                                                                                                             |
| RR | 407 | Ball K, Carver A, Downing K, Jackson M, O'Rourke K. Addressing the social determinants of inequities in physical activity and sedentary behaviours. <i>Health Promotion International</i> . 2015;30 Suppl 2:ii8-ii19.                                                                                                                                           |



|        |     |                                                                                                                                                                                                                                                                                                                                     |
|--------|-----|-------------------------------------------------------------------------------------------------------------------------------------------------------------------------------------------------------------------------------------------------------------------------------------------------------------------------------------|
| RR     | 408 | Bavolek RA, Aubin CD, Kim AJ. Team-based learning: Electrocardiogram interpretation and application for emergency medicine residents. <i>Academic Emergency Medicine</i> . 2013;20(5):S346.                                                                                                                                         |
| RR     | 409 | Li A, Giaddui T, Chen W, Cui Y, McNulty S, Freedman G, et al. An analysis of rapid review cases that failed to meet the RTOG 1005 contouring and dose-volume criteria. <i>International Journal of Radiation Oncology Biology Physics</i> . 2013;87(2):S228.                                                                        |
| RR     | 410 | Neville FG, Goodall CA, Williams DJ, Donnelly PD. Violence brief interventions: A rapid review. <i>Aggression and Violent Behavior</i> . 2014;19(6):692-8.                                                                                                                                                                          |
| RR     | 411 | Wegner I, Niesten MEF, van Werkhoven CH, Grolman W. Rapid Systematic Review of the Epley Maneuver versus Vestibular Rehabilitation for Benign Paroxysmal Positional Vertigo. <i>Otolaryngology--Head And Neck Surgery: Official Journal Of American Academy Of Otolaryngology-Head And Neck Surgery</i> . 2014;151(2):201-7.        |
| RR     | 412 | Oh J, Calabresi PA. Emerging injectable therapies for multiple sclerosis. <i>The Lancet Neurology</i> . 2013;12(11):1115-26.                                                                                                                                                                                                        |
| RR     | 413 | Phillips J. Palliative care systems: Evidence for key models of care elements. <i>Asia-Pacific Journal of Clinical Oncology</i> . 2013;9:95.                                                                                                                                                                                        |
| RR     | 414 | Hinchliffe A. Minor ailments schemes: A rapid review of the evidence. <i>International Journal of Pharmacy Practice</i> . 2012;20:39-40.                                                                                                                                                                                            |
| RR     | 415 | Loveday HP, Wilson JA, Kerr K, Pitchers R, Walker JT, Browne J. Association between healthcare water systems and <i>Pseudomonas aeruginosa</i> infections: a rapid systematic review. <i>The Journal Of Hospital Infection</i> . 2014;86(1):7-15.                                                                                   |
| RR     | 416 | Do Nascimento Tavares SB, De Souza NLA, Manrique EJC, Azara CZS, Da Silveira EA, Amaral RG. Internal quality control for cervical cytopathology: Comparison of potential false-negatives detected at rapid prescreening and at 100% rapid review. <i>Acta Cytologica</i> . 2014;58(5):439-45.                                       |
| RR     | 417 | Konnyu KJ, Kwok E, Skidmore B, Moher D. The effectiveness and safety of emergency department short stay units: a rapid review. <i>Open Medicine: A Peer-Reviewed, Independent, Open-Access Journal</i> . 2012;6(1):e10-e6.                                                                                                          |
| RR     | 418 | Gabapentin for Adults with Neuropathic Pain: A Review of the Clinical Evidence and Guidelines. <i>Canadian Agency for Drugs and Technologies in Health Rapid Response Reports</i> . 2014.                                                                                                                                           |
| RR     | 419 | Harker J, Kleijnen J. What is a rapid review? A methodological exploration of rapid reviews in Health Technology Assessments. <i>International Journal Of Evidence-Based Healthcare</i> . 2012;10(4):397-410.                                                                                                                       |
| RR     | 420 | McCullough AL, Haycock JC, Forward DP, Moran CG. Early management of the severely injured major trauma patient. <i>British Journal Of Anaesthesia</i> . 2014;113(2):234-41.                                                                                                                                                         |
| RR     | 421 | Munn Z, Lockwood C, Moola S. The Development and Use of Evidence Summaries for Point of Care Information Systems: A Streamlined Rapid Review Approach. <i>Worldviews On Evidence-Based Nursing / Sigma Theta Tau International, Honor Society Of Nursing</i> . 2015;12(3):131-8.                                                    |
| RR     | 422 | Fiscella K, Tobin JN, Carroll JK, He H, Ogedegbe G. Ethical oversight in quality improvement and quality improvement research: new approaches to promote a learning health care system. <i>BMC Medical Ethics</i> . 2015;16(1):63-.                                                                                                 |
| RR     | 423 | Davis C, Tomas J. Care of the dying: how do we replace the Liverpool Care Pathway? <i>British Medical Bulletin</i> . 2014;112(1):5-15.                                                                                                                                                                                              |
| RR     | 424 | Blank L, Coster J, O'Cathain A, Knowles E, Tosh J, Turner J, et al. The appropriateness of, and compliance with, telephone triage decisions: a systematic review and narrative synthesis. <i>Journal Of Advanced Nursing</i> . 2012;68(12):2610-21.                                                                                 |
| RR     | 425 | Oh HC, Ng WH. Rapid health technology assessment-intrathecal baclofen pump therapy for intractable spasticity. <i>Proceedings of Singapore Healthcare</i> . 2011;20:66.                                                                                                                                                             |
| RR     | 426 | Drennan VM, Halter M, Brearley S, Carneiro W, Gabe J, Gage H, et al. Investigating the contribution of physician assistants to primary care in England: a mixed-methods study. 2014.                                                                                                                                                |
| RR     | 427 | Dangott B, Salama M. Automated image analysis and scoring of tartrate resistance acid phosphatase preparations. <i>Laboratory Investigation</i> . 2012;92:331A.                                                                                                                                                                     |
| RR     | 428 | Hinrichs S, Jahagirdar D, Miani C, Guerin B, Nolte E. Learning for the NHS on procurement and supply chain management: a rapid evidence assessment. <i>NIHR Journals Library</i> . 2014.                                                                                                                                            |
| RR     | 429 | Brearley SG, Stamatakis Z, Addington-Hall J, Foster C, Hodges L, Jarrett N, et al. The physical and practical problems experienced by cancer survivors: a rapid review and synthesis of the literature. <i>European Journal Of Oncology Nursing: The Official Journal Of European Oncology Nursing Society</i> . 2011;15(3):204-12. |
| RR     | 430 | Moyad MA. Heart health = urologic health and heart unhealthy = urologic unhealthy: Rapid review of lifestyle changes and dietary supplements. <i>Urologic Clinics of North America</i> . 2011;38(3):359-67.                                                                                                                         |
| CRD RR | 431 | Pre-emptive oral non-steroidal anti-inflammatory drugs or acetaminophen for knee arthroscopy: a rapid review (Structured abstract). <i>Health Technology Assessment Database [Internet]</i> . 2014; (3).                                                                                                                            |
| CRD RR | 432 | Pron G. Coronary revascularization in ischemic heart failure patients: a rapid review (Structured abstract). <i>Health Technology Assessment Database [Internet]</i> . 2013; (3).                                                                                                                                                   |
| CRD RR | 433 | Schaik A, Lambrinos A. Vasodilators for in-hospital heart failure management: a rapid review (update) (Structured abstract). <i>Health Technology Assessment Database [Internet]</i> . 2015; (3).                                                                                                                                   |
| CRD RR | 434 | Brener S. Local infiltration analgesia in hip and knee arthroplasty: a rapid review (Structured abstract). <i>Health Technology Assessment Database [Internet]</i> . 2013; (3).                                                                                                                                                     |

|        |     |                                                                                                                                                                                                                                                                                                |
|--------|-----|------------------------------------------------------------------------------------------------------------------------------------------------------------------------------------------------------------------------------------------------------------------------------------------------|
| CRD RR | 435 | Bracing after knee arthroscopy: a rapid review (Structured abstract). Health Technology Assessment Database [Internet]. 2014; (3).                                                                                                                                                             |
| CRD RR | 436 | Preoperative shower or bath with antiseptics before knee arthroscopy: a rapid review (Structured abstract). Health Technology Assessment Database [Internet]. 2014; (3).                                                                                                                       |
| CRD RR | 437 | Pron G. Early mobilization and ambulation in hospitalized heart failure patients: a rapid review (Structured abstract). Health Technology Assessment Database [Internet]. 2013; (3).                                                                                                           |
| CRD RR | 438 | Intra-articular analgesia after knee arthroscopy: a rapid review (Structured abstract). Health Technology Assessment Database [Internet]. 2014; (3).                                                                                                                                           |
| CRD RR | 439 | Costello RB, Lentino CV, Boyd CC, O'Connell ML, Crawford CC, Sprengel ML, et al. The effectiveness of melatonin for promoting healthy sleep: a rapid evidence assessment of the literature (Provisional abstract). Database of Abstracts of Reviews of Effects [Internet]. 2014; (2):[106 p.]. |
| CRD RR | 440 | Monotherapy versus combination therapy for adults hospitalized for community-acquired pneumonia: a rapid review (Structured abstract). Health Technology Assessment Database [Internet]. 2013; (3).                                                                                            |
| CRD RR | 441 | Cost-effectiveness of urgent care for transient ischemic attack: an economic rapid review (Structured abstract). Health Technology Assessment Database [Internet]. 2015; (3).                                                                                                                  |
| CRD RR | 442 | Birmingham SL. Pulmonary rehabilitation setting for adults with chronic obstructive pulmonary disease (COPD): an economic rapid review (Structured abstract). Health Technology Assessment Database [Internet]. 2015; (3).                                                                     |
| CRD RR | 443 | McMartin K. Preoperative cardiac stress tests for noncardiac surgery: a rapid review (Structured abstract). Health Technology Assessment Database [Internet]. 2014; (3).                                                                                                                       |
| CRD RR | 444 | Hemoglobin A1c testing in diabetes: a rapid review (Structured abstract). Health Technology Assessment Database [Internet]. 2014; (3).                                                                                                                                                         |
| CRD RR | 445 | Migliore A, Jefferson T, Cerbo M, Abraha I, Montedori A. Implantable devices for the closure of patent foramen ovale in adults: an Italian rapid health technology assessment (Provisional abstract). Database of Abstracts of Reviews of Effects [Internet]. 2014; (2):[151-61 pp.].          |
| CRD RR | 446 | Schaik A. Optimized timing of thrombolytic therapy for the treatment of stroke: a rapid review (Structured abstract). Health Technology Assessment Database [Internet]. 2013; (3).                                                                                                             |
| CRD RR | 447 | Lockett T, Phillips J, Agar M, Viridun C, Green A, Davidson PM. Elements of effective palliative care models: a rapid review (Provisional abstract). BMC Health Services Research [Internet]. 2014; 14(1):[136 p.].                                                                            |
| CRD RR | 448 | Dorresteyn PM, Ipenburg NA, Murphy KJ, Smit M, Vulpen JK, Wegner I, et al. Rapid systematic review of normal audiometry results as a predictor for benign paroxysmal positional vertigo (Provisional abstract). Otolaryngology - Head and Neck Surgery [Internet]. 2014; 150(6):[919-24 pp.].  |
| CRD RR | 449 | Roberfroid D, San Miguel L, Paulus D. Non-invasive markers of subclinical atherosclerosis for predicting a primary cardiovascular event: a rapid systematic review (Structured abstract). Health Technology Assessment Database [Internet]. 2015; (3).                                         |
| CRD RR | 450 | Fergenbaum J. Harms of Prostate-Specific Antigen (PSA) screening in prostate cancer: a rapid review (Structured abstract). Health Technology Assessment Database [Internet]. 2015; (3).                                                                                                        |
| CRD RR | 451 | Total hip arthroplasty versus hemiarthroplasty for displaced femoral neck fractures: a rapid review (Structured abstract). Health Technology Assessment Database [Internet]. 2013; (3).                                                                                                        |
| CRD RR | 452 | Brener S. Anesthesia among patients undergoing knee arthroplasty: a rapid review (Structured abstract). Health Technology Assessment Database [Internet]. 2013; (3).                                                                                                                           |
| CRD RR | 453 | Nikitovic M. Antibiotic-laden bone cement for primary knee arthroplasty: a rapid review (Structured abstract). Health Technology Assessment Database [Internet]. 2013; (3).                                                                                                                    |
| CRD RR | 454 | Nikitovic M. Clinical utility of echocardiography for patients with hip fracture: a rapid review (Structured abstract). Health Technology Assessment Database [Internet]. 2013; (3).                                                                                                           |
| CRD RR | 455 | Ghazipura M. Shorter versus longer duration of antibiotic therapy in patients with community-acquired pneumonia: a rapid review (Structured abstract). Health Technology Assessment Database [Internet]. 2013; (3).                                                                            |
| CRD RR | 456 | Ghazipura M. Care coordination on postacute stroke, chronic obstructive pulmonary disease, and heart failure clients: a rapid review (Structured abstract). Health Technology Assessment Database [Internet]. 2015; (3).                                                                       |
| CRD RR | 457 | Ghazipura M. Usefulness of urinary antigen testing for Legionella in the treatment of community-acquired pneumonia: a rapid review (Structured abstract). Health Technology Assessment Database [Internet]. 2013; (3).                                                                         |
| CRD RR | 458 | Chaiyachati KH, Ogbuoi O, Price M, Suthar AB, Negussie EK, Barnighausen T. Interventions to improve adherence to antiretroviral therapy: a rapid systematic review (Provisional abstract). Database of Abstracts of Reviews of Effects [Internet]. 2014; (2):[S187-s204 pp.].                  |
| CRD RR | 459 | Brener S. Optimal timing of hip fracture surgery: a rapid review (Structured abstract). Health Technology Assessment Database [Internet]. 2013; (3).                                                                                                                                           |
| CRD RR | 460 | Scheer-Horst ES, Benthem PP, Brintjes TD, Leeuwen RB, Zaag-Loonen HJ. The efficacy of vestibular rehabilitation in patients with benign paroxysmal positional vertigo: a rapid review (Provisional abstract). Database of Abstracts of Reviews of Effects [Internet]. 2014; (2):[740-5 pp.].   |

|        |     |                                                                                                                                                                                                                                                                                                                                                           |
|--------|-----|-----------------------------------------------------------------------------------------------------------------------------------------------------------------------------------------------------------------------------------------------------------------------------------------------------------------------------------------------------------|
| CRD RR | 461 | Hinrichs S, Jahagirdar D, Miani C, Guerin B, Nolte E. Learning for the NHS on procurement and supply chain management: a rapid evidence assessment (Structured abstract). Health Technology Assessment Database [Internet]. 2014; (3).                                                                                                                    |
| CRD RR | 462 | Toomey E, Currie-Murphy L, Matthews J, Hurley DA. The effectiveness of physiotherapist-delivered group education and exercise interventions to promote self-management for people with osteoarthritis and chronic low back pain: rapid review Part I (Provisional abstract). Database of Abstracts of Reviews of Effects [Internet]. 2014; (2);[epub p.]. |
| CRD RR | 463 | Simultaneous or staged bilateral knee arthroplasty: a rapid review (Structured abstract). Health Technology Assessment Database [Internet]. 2013; (3).                                                                                                                                                                                                    |
| CRD RR | 464 | Brener S. The effectiveness of cement in primary hip replacements: a rapid review (Structured abstract). Health Technology Assessment Database [Internet]. 2013; (3).                                                                                                                                                                                     |
| CRD RR | 465 | Dennett L, Harstall C. Stingray catheter and guidewire for recanalization of coronary chronic total occlusions: A rapid evidence assessment (Structured abstract). Health Technology Assessment Database [Internet]. 2013; (3);[28 p.].                                                                                                                   |
| CRD RR | 466 | Turner J, Preston L, Booth A, O'Keeffe C, Campbell F, Jesurasa A, et al. What evidence is there for a relationship between organisational features and patient outcomes in congenital heart disease services? A rapid review (Structured abstract). Health Technology Assessment Database [Internet]. 2014; (3).                                          |
| CRD RR | 467 | Wegner I, Niesten ME, Werkhoven CH, Grolman W. Rapid systematic review of the Epley maneuver versus vestibular rehabilitation for benign paroxysmal positional vertigo (Provisional abstract). Database of Abstracts of Reviews of Effects [Internet]. 2014; (2);[201-7 pp.].                                                                             |
| CRD RR | 468 | Antibiotic coverage in atypical pathogens for adults hospitalized with community-acquired pneumonia: a rapid review (Structured abstract). Health Technology Assessment Database [Internet]. 2013; (3).                                                                                                                                                   |
| CRD RR | 469 | Brener S. Electrocardiograms for diagnosing ischemia as a precipitant to acute heart failure: a rapid review (Structured abstract). Health Technology Assessment Database [Internet]. 2013; (3).                                                                                                                                                          |
| CRD RR | 470 | Schaik A. Vasodilators for in-hospital heart failure management: a rapid review (Structured abstract). Health Technology Assessment Database [Internet]. 2013; (3).                                                                                                                                                                                       |
| CRD RR | 471 | Severity assessment tools for patients with community-acquired pneumonia: a rapid review (Structured abstract). Health Technology Assessment Database [Internet]. 2013; (3).                                                                                                                                                                              |
| CRD RR | 472 | Reinink H, Wegner I, Stegeman I, Grolman W. Rapid systematic review of repeated application of the Epley maneuver for treating posterior BPPV (Provisional abstract). Database of Abstracts of Reviews of Effects [Internet]. 2014; (2);[399-406 pp.].                                                                                                    |
| CRD RR | 473 | Effect of a 60-minute door-to-needle tissue plasminogen activator on stroke disability: a rapid review (Structured abstract). Health Technology Assessment Database [Internet]. 2015; (3).                                                                                                                                                                |
| CRD RR | 474 | Brener S. Chest X-rays for diagnosing pulmonary infection as a precipitant of acute heart failure: a rapid review (Structured abstract). Health Technology Assessment Database [Internet]. 2013; (3).                                                                                                                                                     |
| CRD RR | 475 | Predictive validity of tools used to assess the risk of unplanned admissions: A rapid review of the evidence (Structured abstract). Health Technology Assessment Database [Internet]. 2014; (3).                                                                                                                                                          |
| CRD RR | 476 | Testing vitamin B12 levels in neuropathy, alopecia, dizziness, and fatigue: a rapid review (Structured abstract). Health Technology Assessment Database [Internet]. 2014; (3).                                                                                                                                                                            |
| CRD RR | 477 | Ultrafiltration in heart failure: a rapid review (Structured abstract). Health Technology Assessment Database [Internet]. 2015; (3).                                                                                                                                                                                                                      |
| CRD RR | 478 | Optimal onset-to-admission interval for inpatient stroke rehabilitation: a rapid review (Structured abstract). Health Technology Assessment Database [Internet]. 2013; (3).                                                                                                                                                                               |
| CRD RR | 479 | Jang BH, Lee HY, Jung YJ, An JH. Efficacy of atomoxetine and methylphenidate in attention deficits hyperactivity disorder in adults: a rapid review (Structured abstract). Health Technology Assessment Database [Internet]. 2012; (3).                                                                                                                   |
| CRD RR | 480 | Bond K, Dennett L, Harstall C, Yan C, Chuck A. Total prosthetic replacement of the temporomandibular joint: a rapid evidence assessment and economic analysis (Structured abstract). Health Technology Assessment Database [Internet]. 2013; (3).                                                                                                         |
| CRD RR | 481 | Sehatazadeh S. Effectiveness of increased intensity of rehabilitation in post-stroke patients: a rapid review (Structured abstract). Health Technology Assessment Database [Internet]. 2013; (3).                                                                                                                                                         |
| CRD RR | 482 | Yang ZX, Shen JT, Li YP, Zhao K, Shi CH, Xiao Y, et al. Helical tomotherapy for cancer treatment: a rapid health technology assessment (Provisional abstract). Database of Abstracts of Reviews of Effects [Internet]. 2014; (2);[192-218 pp.].                                                                                                           |
| CRD RR | 483 | Sehatazadeh S. Transient ischemic attack: where can patients receive optimal care? A rapid review (Structured abstract). Health Technology Assessment Database [Internet]. 2013; (3).                                                                                                                                                                     |
| CRD RR | 484 | Nikitovic M. Intramedullary nails in comparison with sliding hip screws for intertrochanteric hip fractures: a rapid review (Structured abstract). Health Technology Assessment Database [Internet]. 2013; (3).                                                                                                                                           |
| CRD RR | 485 | McMartin K. B-type natriuretic peptide testing: a rapid review (Structured abstract). Health Technology Assessment Database [Internet]. 2013; (3).                                                                                                                                                                                                        |
| CRD RR | 486 | Nikitovic M. Intensity of rehabilitation during the acute hospitalization period after hip or knee arthroplasty: a rapid review (Structured abstract). Health Technology Assessment Database [Internet]. 2013; (3).                                                                                                                                       |

|               |     |                                                                                                                                                                                                                                                                                                        |
|---------------|-----|--------------------------------------------------------------------------------------------------------------------------------------------------------------------------------------------------------------------------------------------------------------------------------------------------------|
| <b>CRD RR</b> | 487 | Criteria for switching from intravenous to oral antibiotics in patients hospitalized with community-acquired pneumonia: a rapid review (Structured abstract). Health Technology Assessment Database [Internet]. 2013; (3).                                                                             |
| <b>CRD RR</b> | 488 | Duijn JG, Isfordink LM, Nij Bijvank JA, Stapper CW, Vuren AJ, Wegner I, et al. Rapid systematic review of the Epley maneuver for treating posterior canal benign paroxysmal positional vertigo (Provisional abstract). Database of Abstracts of Reviews of Effects [Internet]. 2014; (2):[925-32 pp.]. |
| <b>CRD RR</b> | 489 | Brener S. Nerve blocks for pain management in patients with hip fractures: a rapid review (Structured abstract). Health Technology Assessment Database [Internet]. 2013; (3).                                                                                                                          |

CSR: Cochrane systematic reviews; SR: non-Cochrane systematic reviews; RR: rapid reviews; CRD RR: Rapid reviews of the University of York, databases of the Center for Reviews and Dissemination
