# Supplementary material for: Characteristics of stakeholder involvement in systematic and rapid reviews: a methodological review in the area of health services research
Source: PubMed Central journal article supplement — BMJ Open. 2019 Aug 15;9(8):e024587. doi: 10.1136/bmjopen-2018-024587 (PMC6701675; doi:10.1136/bmjopen-2018-024587), 2019-08-15
Supplement: bmjopen-2018-024587supp008.pdf [file bmjopen-2018-024587supp008.pdf]

**Characteristics of stakeholder involvement in systematic and rapid reviews:  
a methodological review in the area of health services research**

**Jonas Feldmann, Milo A. Puhan, Margot Mutsch\***

**Supplementary Table S2:**

**Characteristics of the study population by type of included review**

|                                    | <b>Cochrane<br/>SR (%)</b> | <b>Non-Cochrane<br/>SR (%)</b> | <b>RR (%)</b>             | <b>CRD RR<br/>(%)</b> | <b>Total (%)</b>        |
|------------------------------------|----------------------------|--------------------------------|---------------------------|-----------------------|-------------------------|
| <b>Setting</b>                     |                            |                                |                           |                       |                         |
| Hospital setting,<br>inpatients    | 7 (23)                     | 1 (3)                          | 8 (27)                    | 10 (33)               | 26 (22)                 |
| Outpatients                        | 9 (30)                     | 9 (30)                         | 7 (23)                    | 4 (13)                | 29 (24)                 |
| Home setting                       | 0                          | 3 (10)                         | 0                         | 3 (10)                | 6 (5)                   |
| Community setting                  | 5 (17)                     | 10 (33)                        | 13 (43)                   | 7 (23)                | 35 (29)                 |
| Multiple                           | 9 (30)                     | 5 (17)                         | 0                         | 4 (13)                | 18 (15)                 |
| Other                              | 0                          | 2 (7)                          | 2 (7)                     | 2 (7)                 | 6 (5)                   |
| <b>Population size<sup>1</sup></b> |                            |                                |                           |                       |                         |
| Median<br>(range)                  | 733<br>(0; 390,769)        | 2,846.5<br>(36; 4,650,877)     | 2,717<br>(102; 1,700,000) | 349.5<br>(0; 372,746) | 1,622<br>(0; 4,650,877) |
| <b>Population type</b>             |                            |                                |                           |                       |                         |
| Patients with<br>disease/condition | 18 (60)                    | 18 (60)                        | 20 (67)                   | 26 (87)               | 82 (68)                 |
| Healthy population                 | 9 (30)                     | 8 (27)                         | 9 (30)                    | 3 (10)                | 29 (24)                 |
| Other                              | 3 (10)                     | 4 (13)                         | 1 (3)                     | 1 (3)                 | 9 (8)                   |
| <b>Age range (yrs)</b>             |                            |                                |                           |                       |                         |
| Adults (>18)                       | 20 (67)                    | 14 (47)                        | 13 (43)                   | 25 (83)               | 72 (60)                 |

|                     |         |         |         |          |          |
|---------------------|---------|---------|---------|----------|----------|
| Adolescents (13-18) | 2 (7)   | 1 (3)   | 1 (3)   | 1 (3)    | 5 (4)    |
| Children (0-12)     | 3 (10)  | 1 (3)   | 1 (3)   | 0        | 5 (4)    |
| Youth (0-18)        | 1 (3)   | 2 (7)   | 0       | 0        | 3 (3)    |
| Other subgroups     | 1 (3)   | 6 (20)  | 2 (7)   | 3 (10)   | 12 (10)  |
| Population          | 3 (10)  | 6 (20)  | 13 (43) | 1 (3)    | 23 (19)  |
| <b>Sex</b>          |         |         |         |          |          |
| Females and males   | 29 (97) | 28 (93) | 24 (80) | 30 (100) | 111 (93) |
| Females only        | 1 (3)   | 1 (3)   | 4 (13)  | 0        | 6 (5)    |
| Males only          | 0       | 1 (3)   | 2 (7)   | 0        | 3 (3)    |

CRD: University of York, Centre for Reviews and Dissemination; RR: rapid review; SR: systematic review; WHO: World Health Organisation

<sup>1</sup> Zero means that there were no participants mentioned or included in the review.
